# Supplementary material
Source: publisher figshare collection journal article supplement (https://plos.figshare.com/articles/dataset/_/1323015)
Supplement: Supplementary file [file 1]

| Azadirachtin |                              | Control    |                              |
|--------------|------------------------------|------------|------------------------------|
| time (sec)   | Activity (pixels/sec * 10-2) | time (sec) | Activity (pixels/sec * 10-2) |
| 0.0513       | 17.75                        | 0.0725     | 27.25                        |
| 0.0888       | 19.25                        | 0.1063     | 36.25                        |
| 0.1213       | 19                           | 0.14       | 30.25                        |
| 0.1525       | 18.25                        | 0.1738     | 28                           |
| 0.1863       | 20.25                        | 0.2088     | 30.75                        |
| 0.2213       | 19.5                         | 0.2413     | 24                           |
| 0.2525       | 16.5                         | 0.2738     | 23.75                        |
| 0.2863       | 20.5                         | 0.3063     | 30.5                         |
| 0.3163       | 22.25                        | 0.3413     | 24                           |
| 0.3538       | 17.25                        | 0.3725     | 23.75                        |
| 0.3888       | 17.25                        | 0.4075     | 28                           |
| 0.4225       | 23                           | 0.4413     | 21.75                        |
| 0.4538       | 15.5                         | 0.4775     | 28                           |
| 0.485        | 14.25                        | 0.5075     | 22.25                        |
| 0.515        | 18.5                         | 0.5388     | 22.5                         |
| 0.5513       | 15                           | 0.5725     | 24                           |
| 0.5875       | 15                           | 0.6063     | 25.25                        |
| 0.6213       | 16                           | 0.64       | 29.75                        |
| 0.6525       | 19.75                        | 0.6738     | 26.75                        |
| 0.6863       | 20.5                         | 0.7088     | 29                           |
| 0.7213       | 15.75                        | 0.7413     | 27                           |
| 0.7525       | 20.5                         | 0.7738     | 28                           |
| 0.7863       | 17.5                         | 0.8063     | 26.75                        |
| 0.8163       | 15.5                         | 0.8413     | 25.5                         |
| 0.8538       | 15.5                         | 0.8725     | 27                           |
| 0.8888       | 26.5                         | 0.905      | 26.75                        |
| 0.9225       | 17.5                         | 0.9438     | 30.5                         |
| 0.9538       | 16                           | 0.9775     | 25.75                        |
| 0.985        | 19.75                        | 1.0075     | 24.5                         |
| 1.015        | 15.5                         | 1.0413     | 27.75                        |
| 1.0513       | 15.75                        | 1.0725     | 28.5                         |
| 1.0875       | 14.5                         | 1.1063     | 25                           |
| 1.1213       | 16.25                        | 1.1375     | 23.25                        |
| 1.1525       | 15.5                         | 1.1738     | 25.25                        |
| 1.1863       | 14.25                        | 1.21       | 20.25                        |
| 1.2238       | 16.25                        | 1.2413     | 22.5                         |
| 1.2525       | 17.25                        | 1.2738     | 21                           |
| 1.2863       | 15                           | 1.3063     | 25.25                        |
| 1.3163       | 20                           | 1.3413     | 23.25                        |
| 1.3525       | 16.5                         | 1.3725     | 23.25                        |
| 1.3888       | 13.5                         | 1.405      | 26.25                        |
| 1.4225       | 15                           | 1.4438     | 25                           |
| 1.4538       | 17                           | 1.4775     | 23.5                         |
| 1.485        | 18.75                        | 1.5075     | 25.5                         |
| 1.515        | 16.75                        | 1.5413     | 23.5                         |
| 1.5538       | 16.5                         | 1.5713     | 20.5                         |
| 1.5875       | 13.25                        | 1.6088     | 23.75                        |

|        |       |        |       |
|--------|-------|--------|-------|
| 1.6225 | 16    | 1.6413 | 21.5  |
| 1.655  | 20.5  | 1.6738 | 21.5  |
| 1.69   | 22    | 1.7088 | 22.25 |
| 1.7238 | 18.75 | 1.7413 | 20    |
| 1.755  | 16.5  | 1.7738 | 18.75 |
| 1.7875 | 18.75 | 1.8063 | 21.75 |
| 1.8188 | 20.5  | 1.8413 | 25    |
| 1.8563 | 19    | 1.8725 | 24    |
| 1.8913 | 29.25 | 1.905  | 26    |
| 1.9213 | 19.25 | 1.9438 | 21.5  |
| 1.955  | 18.5  | 1.9775 | 23.5  |
| 1.9863 | 29    | 2.0075 | 24.25 |
| 2.02   | 25.75 | 2.0413 | 25    |
| 2.0538 | 18    | 2.0713 | 26.5  |
| 2.0875 | 14    | 2.1063 | 27    |
| 2.1225 | 13.75 | 2.1375 | 28    |
| 2.155  | 13.25 | 2.1713 | 22    |
| 2.1888 | 17.25 | 2.2088 | 32.75 |
| 2.2238 | 12.25 | 2.2413 | 25.5  |
| 2.255  | 18    | 2.275  | 29.25 |
| 2.2875 | 16.5  | 2.3063 | 24.75 |
| 2.3188 | 12.75 | 2.3413 | 26    |
| 2.3563 | 16.75 | 2.3725 | 27.25 |
| 2.3913 | 13.25 | 2.405  | 28    |
| 2.4213 | 15    | 2.4438 | 26.75 |
| 2.455  | 15.5  | 2.4775 | 22    |
| 2.4863 | 17.75 | 2.5075 | 23.5  |
| 2.52   | 15.75 | 2.5413 | 27.5  |
| 2.5538 | 16    | 2.5713 | 26    |
| 2.5875 | 15.25 | 2.6063 | 26.25 |
| 2.6238 | 15.5  | 2.6375 | 24    |
| 2.655  | 16    | 2.6725 | 24    |
| 2.6888 | 18.25 | 2.71   | 29    |
| 2.7238 | 14.5  | 2.7413 | 24.5  |
| 2.755  | 15    | 2.775  | 26.5  |
| 2.7875 | 16    | 2.8063 | 25    |
| 2.8188 | 14.25 | 2.8425 | 26.25 |
| 2.8538 | 16    | 2.8725 | 24    |
| 2.8913 | 15.5  | 2.905  | 21.25 |
| 2.9213 | 12    | 2.9425 | 31.75 |
| 2.955  | 14.25 | 2.9775 | 24    |
| 2.9863 | 15.5  | 3.0075 | 23.25 |
| 3.0213 | 15    | 3.0413 | 22.75 |
| 3.0538 | 17    | 3.0713 | 21.25 |
| 3.0875 | 20.25 | 3.1063 | 24    |
| 3.1225 | 17.25 | 3.1375 | 23.25 |
| 3.155  | 18.75 | 3.1725 | 20.25 |
| 3.1888 | 15    | 3.21   | 22.5  |
| 3.2238 | 11.75 | 3.2413 | 21    |
| 3.255  | 18.75 | 3.275  | 26.75 |

|        |       |        |       |
|--------|-------|--------|-------|
| 3.2875 | 13.25 | 3.3063 | 21.5  |
| 3.3188 | 13    | 3.3413 | 24    |
| 3.3513 | 17.25 | 3.3725 | 23    |
| 3.3913 | 17.75 | 3.405  | 20.25 |
| 3.4213 | 17    | 3.4425 | 23.5  |
| 3.455  | 16.25 | 3.4775 | 24.25 |
| 3.4863 | 17.75 | 3.51   | 23.75 |
| 3.52   | 17    | 3.5413 | 25    |
| 3.5538 | 18.5  | 3.5713 | 24.5  |
| 3.5875 | 18.25 | 3.6063 | 24.5  |
| 3.6225 | 18    | 3.6388 | 23.75 |
| 3.655  | 14.25 | 3.6725 | 25.25 |
| 3.6913 | 16    | 3.71   | 25.25 |
| 3.7238 | 11.75 | 3.7413 | 25.25 |
| 3.7563 | 15.5  | 3.775  | 23.5  |
| 3.7875 | 16.25 | 3.8063 | 26.5  |
| 3.8188 | 16.5  | 3.8388 | 25    |
| 3.8513 | 15.5  | 3.8738 | 25.75 |
| 3.8913 | 14    | 3.9038 | 27.25 |
| 3.9213 | 14.5  | 3.94   | 22.5  |
| 3.955  | 16.75 | 3.9775 | 23.5  |
| 3.9863 | 10.75 | 4.01   | 22.25 |
| 4.02   | 15.75 | 4.045  | 24.5  |
| 4.0538 | 16    | 4.0713 | 24.25 |
| 4.0875 | 16    | 4.1063 | 24.75 |
| 4.1225 | 13.25 | 4.1375 | 25.75 |
| 4.155  | 14.5  | 4.1725 | 27.25 |
| 4.1888 | 16.5  | 4.21   | 28.5  |
| 4.2238 | 17    | 4.2413 | 24.75 |
| 4.2563 | 23.75 | 4.275  | 25.25 |
| 4.2875 | 16.25 | 4.3063 | 23.5  |
| 4.3188 | 18.75 | 4.3388 | 24.75 |
| 4.3513 | 16.25 | 4.3725 | 27.5  |
| 4.3913 | 14.75 | 4.4038 | 21.25 |
| 4.4213 | 15.5  | 4.44   | 25.5  |
| 4.455  | 14.75 | 4.4788 | 24.25 |
| 4.4863 | 15.75 | 4.51   | 24.75 |
| 4.52   | 15.75 | 4.5413 | 27.5  |
| 4.5538 | 17.25 | 4.5713 | 24    |
| 4.5875 | 17    | 4.6038 | 23.75 |
| 4.6225 | 14.25 | 4.6375 | 22.75 |
| 4.655  | 16.75 | 4.6725 | 18    |
| 4.6888 | 17.75 | 4.71   | 23.5  |
| 4.7238 | 16.75 | 4.7413 | 26.5  |
| 4.7563 | 17.25 | 4.775  | 22.75 |
| 4.7875 | 17    | 4.8063 | 25    |
| 4.8188 | 15.5  | 4.8388 | 25.5  |
| 4.8513 | 16.5  | 4.8725 | 24.25 |
| 4.8913 | 16    | 4.9063 | 28.5  |
| 4.9213 | 15.75 | 4.94   | 27.75 |

|        |       |        |       |
|--------|-------|--------|-------|
| 4.955  | 16.25 | 4.9775 | 24.5  |
| 4.9863 | 19.25 | 5.01   | 22.5  |
| 5.02   | 15.75 | 5.0413 | 29.25 |
| 5.0538 | 15.25 | 5.0713 | 22.75 |
| 5.0875 | 15.5  | 5.1038 | 27.75 |
| 5.1213 | 16.75 | 5.1375 | 29    |
| 5.155  | 16.25 | 5.1725 | 27    |
| 5.1888 | 16.25 | 5.21   | 22.5  |
| 5.2238 | 17.5  | 5.2425 | 24.5  |
| 5.2563 | 15    | 5.275  | 25.75 |
| 5.2875 | 14.25 | 5.3063 | 24.75 |
| 5.3188 | 15    | 5.3388 | 23.5  |
| 5.3525 | 16.25 | 5.3725 | 23.25 |
| 5.3913 | 15.5  | 5.4063 | 26.75 |
| 5.4213 | 14.25 | 5.44   | 18.25 |
| 5.455  | 15.75 | 5.4775 | 24    |
| 5.4863 | 15    | 5.51   | 22.5  |
| 5.52   | 15.5  | 5.5413 | 26    |
| 5.5538 | 18.25 | 5.5713 | 23.5  |
| 5.5875 | 17.5  | 5.6038 | 23.75 |
| 5.6213 | 21.75 | 5.6375 | 24.25 |
| 5.655  | 13    | 5.6738 | 26    |
| 5.6888 | 21.75 | 5.71   | 21.75 |
| 5.7238 | 17.5  | 5.7425 | 25    |
| 5.7563 | 17    | 5.775  | 26.5  |
| 5.7875 | 15.75 | 5.8063 | 23    |
| 5.8188 | 16    | 5.8388 | 26.5  |
| 5.85   | 16.25 | 5.8725 | 26.5  |
| 5.8913 | 16.25 | 5.9063 | 22.5  |
| 5.9213 | 17.25 | 5.94   | 23.5  |
| 5.955  | 19    | 5.9775 | 26.5  |
| 5.9888 | 16    | 6.01   | 21.5  |
| 6.02   | 14.75 | 6.0413 | 29.75 |
| 6.0538 | 16.25 | 6.0713 | 23.75 |
| 6.0875 | 16.75 | 6.1013 | 26.5  |
| 6.1213 | 19.25 | 6.1375 | 26    |
| 6.155  | 14.75 | 6.17   | 27.25 |
| 6.1888 | 13.5  | 6.21   | 27    |
| 6.2238 | 18    | 6.2425 | 24.25 |
| 6.2563 | 15.25 | 6.275  | 24.25 |
| 6.2875 | 17.75 | 6.3063 | 22.25 |
| 6.3188 | 18.75 | 6.3388 | 27.25 |
| 6.35   | 18.75 | 6.3713 | 26    |
| 6.3913 | 16.75 | 6.4063 | 22.75 |
| 6.4213 | 17.5  | 6.44   | 25    |
| 6.455  | 16.75 | 6.4775 | 23.5  |
| 6.4888 | 13.25 | 6.51   | 24.25 |
| 6.52   | 16.5  | 6.5425 | 27.5  |
| 6.5538 | 13.75 | 6.5713 | 26.25 |
| 6.5875 | 16.25 | 6.6013 | 23.75 |

|        |       |        |       |
|--------|-------|--------|-------|
| 6.6225 | 14.5  | 6.6388 | 24.75 |
| 6.655  | 19.25 | 6.67   | 21    |
| 6.6888 | 14.25 | 6.71   | 24.25 |
| 6.7238 | 14.5  | 6.7425 | 24    |
| 6.7563 | 15    | 6.775  | 27    |
| 6.7875 | 13    | 6.8063 | 25.75 |
| 6.8188 | 15.5  | 6.8388 | 26.25 |
| 6.85   | 16.75 | 6.8713 | 22.75 |
| 6.8888 | 15.5  | 6.9063 | 30.25 |
| 6.9213 | 17    | 6.94   | 31.5  |
| 6.955  | 14.25 | 6.98   | 29.5  |
| 6.9888 | 17.25 | 7.01   | 26.25 |
| 7.02   | 16.5  | 7.0413 | 24.5  |
| 7.0538 | 13.5  | 7.0713 | 21.75 |
| 7.0888 | 14.75 | 7.1013 | 28    |
| 7.12   | 17.25 | 7.1388 | 29.5  |
| 7.155  | 15.5  | 7.17   | 25    |
| 7.1888 | 12.25 | 7.21   | 26.75 |
| 7.2238 | 16.25 | 7.2425 | 28    |
| 7.2563 | 15.5  | 7.275  | 25.25 |
| 7.2875 | 16.25 | 7.3063 | 26.5  |
| 7.3188 | 14.5  | 7.3388 | 28    |
| 7.35   | 13.75 | 7.3713 | 24    |
| 7.3888 | 14.25 | 7.4063 | 26.75 |
| 7.4213 | 12.5  | 7.4425 | 31.25 |
| 7.455  | 20.75 | 7.48   | 22.25 |
| 7.4913 | 14    | 7.51   | 27    |
| 7.52   | 12.25 | 7.5413 | 23    |
| 7.5538 | 14    | 7.5713 | 27.75 |
| 7.5875 | 12.25 | 7.6013 | 28.5  |
| 7.62   | 16.75 | 7.6388 | 24.25 |
| 7.655  | 15    | 7.67   | 24.75 |
| 7.6888 | 16.75 | 7.71   | 23    |
| 7.7238 | 17.25 | 7.7425 | 24    |
| 7.7563 | 17.5  | 7.775  | 28    |
| 7.7875 | 19    | 7.8063 | 22    |
| 7.8188 | 12.5  | 7.8388 | 26.25 |
| 7.85   | 16.25 | 7.87   | 26.5  |
| 7.8888 | 16.75 | 7.9063 | 25.5  |
| 7.9213 | 12.75 | 7.9425 | 30.25 |
| 7.955  | 16.5  | 7.98   | 24    |
| 7.9888 | 13    | 8.01   | 30.5  |
| 8.02   | 13.5  | 8.0413 | 25    |
| 8.0538 | 12.25 | 8.0713 | 30    |
| 8.0875 | 12.5  | 8.1013 | 25.25 |
| 8.12   | 13.75 | 8.1363 | 23.5  |
| 8.1525 | 11.75 | 8.17   | 27.25 |
| 8.1888 | 12    | 8.21   | 27.25 |
| 8.2263 | 14.5  | 8.2425 | 27    |
| 8.2563 | 12    | 8.275  | 27    |

|        |       |        |       |
|--------|-------|--------|-------|
| 8.2875 | 10    | 8.3063 | 29    |
| 8.3188 | 14    | 8.3388 | 26.5  |
| 8.35   | 12    | 8.37   | 29.5  |
| 8.3888 | 16    | 8.4063 | 25.5  |
| 8.4213 | 12    | 8.4425 | 26    |
| 8.455  | 12    | 8.48   | 24.5  |
| 8.4888 | 14.5  | 8.51   | 21.5  |
| 8.52   | 12.25 | 8.5413 | 26.75 |
| 8.5538 | 14.75 | 8.5713 | 24.75 |
| 8.5875 | 16.25 | 8.6013 | 24.5  |
| 8.62   | 16.75 | 8.6363 | 28    |
| 8.6525 | 13    | 8.67   | 26.5  |
| 8.6888 | 14.75 | 8.71   | 23.5  |
| 8.7263 | 16.25 | 8.7425 | 22.25 |
| 8.7563 | 20.25 | 8.775  | 23.75 |
| 8.7875 | 15.25 | 8.8063 | 27.75 |
| 8.8188 | 18    | 8.8388 | 27.5  |
| 8.85   | 13.75 | 8.87   | 24.25 |
| 8.8888 | 17.25 | 8.9063 | 22.5  |
| 8.9213 | 13    | 8.94   | 23.75 |
| 8.955  | 12.75 | 8.98   | 22    |
| 8.9888 | 14    | 9.01   | 24.75 |
| 9.02   | 15.25 | 9.0413 | 25.5  |
| 9.0538 | 13.25 | 9.0713 | 19.75 |
| 9.0875 | 11.5  | 9.1013 | 28.25 |
| 9.12   | 15.5  | 9.1363 | 22    |
| 9.1525 | 15.75 | 9.17   | 24.25 |
| 9.1888 | 9.5   | 9.2113 | 31.25 |
| 9.2263 | 12.75 | 9.2425 | 31    |
| 9.2563 | 11.75 | 9.275  | 27.25 |
| 9.2875 | 11    | 9.3063 | 23    |
| 9.3188 | 11.5  | 9.3388 | 22.25 |
| 9.35   | 15    | 9.37   | 24.75 |
| 9.3913 | 19    | 9.4063 | 23.75 |
| 9.42   | 17.75 | 9.4413 | 26.5  |
| 9.455  | 12.75 | 9.48   | 23.25 |
| 9.4913 | 14    | 9.51   | 23.75 |
| 9.52   | 15.5  | 9.5413 | 22.5  |
| 9.5538 | 15.25 | 9.5713 | 26    |
| 9.5875 | 14.5  | 9.6013 | 26.75 |
| 9.62   | 14.5  | 9.6363 | 28.5  |
| 9.6525 | 15    | 9.6725 | 28.5  |
| 9.6888 | 16.5  | 9.7113 | 35    |
| 9.7263 | 16    | 9.7438 | 23.5  |
| 9.7563 | 15.75 | 9.7775 | 21.5  |
| 9.7875 | 18.25 | 9.8088 | 24.25 |
| 9.8175 | 16.75 | 9.8413 | 22    |
| 9.85   | 18    | 9.8725 | 24.5  |
| 9.8888 | 15.75 | 9.9063 | 25.25 |
| 9.92   | 18.75 | 9.9438 | 22.25 |

|         |       |         |       |
|---------|-------|---------|-------|
| 9.955   | 15    | 9.9825  | 27.5  |
| 9.9888  | 14.25 | 10.0125 | 24.75 |
| 10.02   | 17    | 10.0425 | 24.25 |
| 10.0538 | 17.75 | 10.0725 | 19    |
| 10.0875 | 14.5  | 10.1025 | 21.5  |
| 10.12   | 14.25 | 10.135  | 25.75 |
| 10.1525 | 15.75 | 10.1738 | 21    |
| 10.1888 | 14.5  | 10.2113 | 24.25 |
| 10.2263 | 19    | 10.2438 | 23.5  |
| 10.2563 | 17.25 | 10.2775 | 22.75 |
| 10.2875 | 12.5  | 10.3088 | 26.5  |
| 10.3175 | 15.75 | 10.3413 | 26.5  |
| 10.35   | 16    | 10.375  | 24    |
| 10.3888 | 14.75 | 10.4063 | 26.25 |
| 10.42   | 14.5  | 10.4438 | 23.75 |
| 10.455  | 14.25 | 10.4825 | 25.25 |
| 10.4888 | 17.75 | 10.5125 | 30.5  |
| 10.52   | 15    | 10.5425 | 31    |
| 10.5538 | 14    | 10.5725 | 28.5  |
| 10.5875 | 13.25 | 10.6025 | 30.25 |
| 10.62   | 14.75 | 10.635  | 31.5  |
| 10.6525 | 12.75 | 10.675  | 23.5  |
| 10.6863 | 13    | 10.7113 | 24.5  |
| 10.7263 | 10.25 | 10.7438 | 28    |
| 10.7563 | 10.25 | 10.7775 | 25.75 |
| 10.7875 | 12.5  | 10.8088 | 24.25 |
| 10.8175 | 14    | 10.8413 | 23.5  |
| 10.85   | 12.5  | 10.875  | 27.5  |
| 10.8888 | 10.75 | 10.9063 | 25.5  |
| 10.92   | 15.25 | 10.9438 | 26    |
| 10.9563 | 9.5   | 10.9825 | 26    |
| 10.9888 | 13.5  | 11.0125 | 26.5  |
| 11.02   | 10.5  | 11.0425 | 27.5  |
| 11.0538 | 10.5  | 11.0725 | 26    |
| 11.0875 | 9.5   | 11.1025 | 26    |
| 11.12   | 11.25 | 11.135  | 27    |
| 11.1525 | 10    | 11.1738 | 26    |
| 11.1863 | 13.75 | 11.2125 | 28    |
| 11.2263 | 14.5  | 11.2438 | 26.5  |
| 11.2563 | 14.25 | 11.2775 | 29.25 |
| 11.2875 | 18.25 | 11.3088 | 24.75 |
| 11.3175 | 14.75 | 11.3413 | 23.5  |
| 11.35   | 17.75 | 11.375  | 26.5  |
| 11.3888 | 17    | 11.4063 | 27.25 |
| 11.42   | 15.75 | 11.4438 | 22    |
| 11.4563 | 17    | 11.4825 | 25.25 |
| 11.4888 | 15    | 11.5125 | 26.75 |
| 11.52   | 15.5  | 11.5425 | 22.5  |
| 11.5538 | 15    | 11.5725 | 28    |
| 11.5875 | 16.5  | 11.6025 | 29.75 |

|         |       |         |       |
|---------|-------|---------|-------|
| 11.62   | 12.75 | 11.635  | 26    |
| 11.6525 | 15.25 | 11.6738 | 30.25 |
| 11.6863 | 16.25 | 11.7125 | 26.5  |
| 11.7263 | 15.25 | 11.7463 | 29.25 |
| 11.7563 | 18    | 11.7775 | 25.5  |
| 11.7875 | 12.75 | 11.8088 | 23    |
| 11.8175 | 13    | 11.8413 | 23.75 |
| 11.85   | 10.75 | 11.875  | 20    |
| 11.8888 | 16    | 11.905  | 24    |
| 11.92   | 14.25 | 11.9438 | 22.5  |
| 11.9563 | 13.75 | 11.9825 | 26.75 |
| 11.9888 | 13.5  | 12.0125 | 27.5  |
| 12.02   | 13.25 | 12.0425 | 21    |
| 12.0538 | 18.25 | 12.0725 | 23.75 |
| 12.0875 | 15.75 | 12.1025 | 28.25 |
| 12.12   | 11.25 | 12.135  | 27.25 |
| 12.1525 | 13.5  | 12.1738 | 25.25 |
| 12.1863 | 9.75  | 12.2113 | 25.75 |
| 12.2263 | 14.5  | 12.2438 | 22.75 |
| 12.2563 | 14.75 | 12.2775 | 25.75 |
| 12.2875 | 13    | 12.3088 | 23    |
| 12.3175 | 11.5  | 12.3413 | 22.5  |
| 12.35   | 14.25 | 12.375  | 19.75 |
| 12.3888 | 11    | 12.405  | 23    |
| 12.42   | 8.75  | 12.4438 | 21.5  |
| 12.455  | 14.5  | 12.4825 | 21.75 |
| 12.4888 | 10.25 | 12.5125 | 27.75 |
| 12.52   | 10.75 | 12.5425 | 26.5  |
| 12.5538 | 10.75 | 12.5725 | 26.25 |
| 12.585  | 7.25  | 12.6025 | 22.25 |
| 12.62   | 9.5   | 12.635  | 22.75 |
| 12.6525 | 10.5  | 12.6738 | 27.5  |
| 12.6863 | 14    | 12.7113 | 28.75 |
| 12.7263 | 16.5  | 12.7463 | 28    |
| 12.7563 | 11.5  | 12.7775 | 23    |
| 12.7875 | 13.25 | 12.8088 | 19.5  |
| 12.8175 | 10    | 12.8413 | 21    |
| 12.85   | 11.75 | 12.875  | 26.5  |
| 12.8888 | 12.25 | 12.905  | 31.5  |
| 12.92   | 14.75 | 12.9413 | 25.5  |
| 12.955  | 13.75 | 12.9825 | 27.75 |
| 12.9888 | 15.25 | 13.0125 | 23    |
| 13.02   | 13.25 | 13.0425 | 27.5  |
| 13.0538 | 15.5  | 13.0725 | 21.5  |
| 13.085  | 18.25 | 13.1025 | 26.5  |
| 13.12   | 15.5  | 13.135  | 23.5  |
| 13.1525 | 12    | 13.1763 | 21    |
| 13.1863 | 16    | 13.2113 | 23    |
| 13.2263 | 12.5  | 13.2438 | 24    |
| 13.2563 | 11.75 | 13.2775 | 22.5  |



|         |       |         |       |
|---------|-------|---------|-------|
| 13.2875 | 10.75 | 13.31   | 25.5  |
| 13.3175 | 13    | 13.3413 | 19.25 |
| 13.35   | 10.5  | 13.375  | 25    |
| 13.3888 | 14.75 | 13.41   | 26.5  |
| 13.42   | 12.75 | 13.4438 | 20.25 |
| 13.455  | 10.25 | 13.4825 | 24.5  |
| 13.4888 | 13.25 | 13.5125 | 26.75 |
| 13.52   | 9.5   | 13.5425 | 23.5  |
| 13.5538 | 13.25 | 13.5725 | 19.75 |
| 13.585  | 10.5  | 13.6025 | 25    |
| 13.62   | 12    | 13.635  | 24    |
| 13.6525 | 14    | 13.6738 | 25.75 |
| 13.6863 | 12.75 | 13.7113 | 31.25 |
| 13.7238 | 13.75 | 13.7438 | 21.75 |
| 13.7563 | 10.25 | 13.7775 | 27    |
| 13.7875 | 10    | 13.8088 | 23    |
| 13.8175 | 14    | 13.8413 | 23.75 |
| 13.85   | 12    | 13.875  | 25    |
| 13.8888 | 12.75 | 13.91   | 30.5  |
| 13.92   | 15    | 13.9438 | 25.25 |
| 13.955  | 16    | 13.9825 | 26.25 |
| 13.9888 | 17    | 14.0125 | 24.75 |
| 14.02   | 14    | 14.0425 | 27.5  |
| 14.0538 | 16    | 14.0725 | 29.25 |
| 14.085  | 17.25 | 14.1025 | 26.75 |
| 14.12   | 14.75 | 14.135  | 33.75 |
| 14.155  | 13.75 | 14.1738 | 26.25 |
| 14.1863 | 16    | 14.21   | 27.5  |
| 14.2238 | 18.75 | 14.2438 | 28    |
| 14.2563 | 19    | 14.2775 | 23.25 |
| 14.2875 | 16.75 | 14.3088 | 23.5  |
| 14.3175 | 16.75 | 14.3413 | 25    |
| 14.35   | 19.25 | 14.3788 | 31    |
| 14.3888 | 15    | 14.415  | 22.75 |
| 14.4213 | 14.5  | 14.4475 | 21.5  |
| 14.455  | 12.5  | 14.4863 | 22.5  |
| 14.4888 | 16    | 14.5163 | 21.5  |
| 14.52   | 11.25 | 14.5488 | 24.25 |
| 14.5538 | 13.5  | 14.5763 | 25.25 |
| 14.585  | 16.25 | 14.6088 | 21.25 |
| 14.62   | 15.75 | 14.6388 | 26.5  |
| 14.6525 | 14    | 14.6763 | 24    |
| 14.6863 | 12.5  | 14.7188 | 25.75 |
| 14.7238 | 16    | 14.75   | 21    |
| 14.7563 | 14.5  | 14.7825 | 26.75 |
| 14.7875 | 14.25 | 14.8138 | 24    |
| 14.8175 | 16.25 | 14.8488 | 24    |
| 14.8475 | 18.5  | 14.88   | 22    |
| 14.89   | 19    | 14.9163 | 17.5  |
| 14.92   | 16.5  | 14.95   | 18.5  |

|         |       |         |       |
|---------|-------|---------|-------|
| 14.955  | 16.5  | 14.9875 | 21    |
| 14.9875 | 15.5  | 15.0188 | 23.25 |
| 15.02   | 14.75 | 15.0488 | 20.5  |
| 15.0538 | 12    | 15.0788 | 22.25 |
| 15.085  | 14    | 15.1113 | 23.5  |
| 15.12   | 14.25 | 15.1413 | 16.5  |
| 15.1525 | 17    | 15.1763 | 19.5  |
| 15.1888 | 19.75 | 15.2188 | 19    |
| 15.2238 | 16    | 15.25   | 21    |
| 15.2563 | 17.25 | 15.2825 | 26    |
| 15.2875 | 15.5  | 15.3138 | 21.75 |
| 15.3175 | 18.75 | 15.3488 | 23.5  |
| 15.3475 | 17    | 15.38   | 24.25 |
| 15.3888 | 18    | 15.4163 | 24.25 |
| 15.42   | 18.75 | 15.45   | 23.5  |
| 15.455  | 14.5  | 15.4875 | 25    |
| 15.4875 | 18    | 15.5188 | 22.5  |
| 15.52   | 19    | 15.5488 | 22.25 |
| 15.5538 | 20.5  | 15.5788 | 21.5  |
| 15.585  | 18    | 15.6138 | 23.25 |
| 15.62   | 17.25 | 15.6413 | 17.75 |
| 15.6525 | 19    | 15.6763 | 23.5  |
| 15.6888 | 17    | 15.7188 | 19.75 |
| 15.7238 | 18.25 | 15.75   | 23.25 |
| 15.7563 | 18.5  | 15.7825 | 24.5  |
| 15.7875 | 17.75 | 15.8138 | 24.75 |
| 15.82   | 20.75 | 15.8488 | 22.25 |
| 15.8513 | 17.25 | 15.88   | 21.25 |
| 15.8913 | 18.75 | 15.9163 | 19.5  |
| 15.9225 | 23.25 | 15.95   | 27    |
| 15.9588 | 17.75 | 15.9875 | 26    |
| 15.99   | 15.75 | 16.0188 | 23.5  |
| 16.0225 | 15.75 | 16.0488 | 19.75 |
| 16.055  | 17.5  | 16.0788 | 26.75 |
| 16.0863 | 15.75 | 16.1113 | 30    |
| 16.1213 | 17.75 | 16.1438 | 26.75 |
| 16.1538 | 17    | 16.1763 | 21.5  |
| 16.1913 | 15.75 | 16.215  | 26.75 |
| 16.225  | 17.5  | 16.25   | 23    |
| 16.255  | 17.75 | 16.2825 | 25    |
| 16.29   | 18.5  | 16.3138 | 30    |
| 16.32   | 20.25 | 16.3488 | 27.75 |
| 16.3513 | 18.25 | 16.38   | 25.25 |
| 16.3913 | 17.75 | 16.4163 | 25.75 |
| 16.4225 | 16.5  | 16.45   | 22.25 |
| 16.4588 | 17.25 | 16.485  | 21    |
| 16.49   | 16.25 | 16.5188 | 21.75 |
| 16.5225 | 13.75 | 16.5488 | 26.5  |
| 16.555  | 14.75 | 16.5788 | 24.75 |
| 16.5863 | 14.75 | 16.6113 | 21.75 |

|         |       |         |       |
|---------|-------|---------|-------|
| 16.6213 | 17    | 16.6438 | 24    |
| 16.6538 | 16    | 16.6763 | 29    |
| 16.6913 | 18.75 | 16.715  | 25.5  |
| 16.725  | 12.5  | 16.75   | 27.5  |
| 16.755  | 13.25 | 16.7825 | 27.5  |
| 16.79   | 15.25 | 16.8138 | 24.5  |
| 16.82   | 16.75 | 16.8488 | 23.5  |
| 16.8513 | 11.75 | 16.88   | 26    |
| 16.8913 | 13    | 16.9163 | 29    |
| 16.9225 | 11.5  | 16.9488 | 22.75 |
| 16.9588 | 12    | 16.985  | 25    |
| 16.99   | 18    | 17.0188 | 26.75 |
| 17.0225 | 14.75 | 17.0488 | 24    |
| 17.055  | 16.25 | 17.0788 | 25.75 |
| 17.0863 | 17    | 17.1113 | 19.75 |
| 17.12   | 19.25 | 17.1463 | 27    |
| 17.1538 | 16    | 17.1763 | 25.25 |
| 17.1913 | 17    | 17.215  | 24.75 |
| 17.225  | 17.25 | 17.25   | 24.75 |
| 17.255  | 16.5  | 17.2825 | 24    |
| 17.29   | 15.25 | 17.3138 | 21.25 |
| 17.32   | 15    | 17.3488 | 20    |
| 17.3513 | 15    | 17.38   | 22.5  |
| 17.3913 | 16.5  | 17.4163 | 18.5  |
| 17.4225 | 16.25 | 17.4488 | 21.5  |
| 17.4588 | 20    | 17.485  | 17.5  |
| 17.49   | 16.75 | 17.5188 | 17.25 |
| 17.5225 | 17.75 | 17.5488 | 18.75 |
| 17.555  | 15.5  | 17.5788 | 19.5  |
| 17.5863 | 16.25 | 17.6113 | 21.25 |
| 17.62   | 19    | 17.6463 | 20.75 |
| 17.6538 | 14.25 | 17.6763 | 25.25 |
| 17.6913 | 15.25 | 17.715  | 20.25 |
| 17.725  | 15    | 17.75   | 23    |
| 17.755  | 15.75 | 17.7825 | 23.5  |
| 17.79   | 18    | 17.8138 | 20    |
| 17.82   | 15.5  | 17.8513 | 20.5  |
| 17.8513 | 18.5  | 17.88   | 23.25 |
| 17.8913 | 12.5  | 17.9163 | 24.75 |
| 17.9225 | 13.25 | 17.95   | 23    |
| 17.9588 | 13.25 | 17.9838 | 27.75 |
| 17.99   | 17.5  | 18.02   | 24.75 |
| 18.02   | 18    | 18.0488 | 25.25 |
| 18.055  | 17.25 | 18.0788 | 28    |
| 18.0863 | 16.75 | 18.1113 | 22.25 |
| 18.12   | 17.5  | 18.1463 | 22.75 |
| 18.1538 | 19.25 | 18.1763 | 22.5  |
| 18.1913 | 20    | 18.215  | 26    |
| 18.225  | 18.75 | 18.25   | 25.75 |
| 18.255  | 19.5  | 18.2825 | 24.5  |

|         |       |         |       |
|---------|-------|---------|-------|
| 18.29   | 14.25 | 18.315  | 23.25 |
| 18.32   | 12.5  | 18.3488 | 27.25 |
| 18.3513 | 15.5  | 18.38   | 26.5  |
| 18.3913 | 16.25 | 18.4163 | 26.5  |
| 18.4225 | 14.25 | 18.4488 | 21.75 |
| 18.4588 | 15.25 | 18.4838 | 27.5  |
| 18.49   | 16.25 | 18.5188 | 21.25 |
| 18.52   | 14.5  | 18.5488 | 21.75 |
| 18.555  | 13.75 | 18.5788 | 24.5  |
| 18.5863 | 14.5  | 18.6113 | 26.75 |
| 18.62   | 15.5  | 18.6463 | 22.25 |
| 18.6538 | 18    | 18.6763 | 27    |
| 18.6913 | 15.25 | 18.715  | 25.25 |
| 18.725  | 12.25 | 18.75   | 28    |
| 18.755  | 13    | 18.7825 | 19.75 |
| 18.79   | 14.75 | 18.8138 | 27.25 |
| 18.82   | 18.75 | 18.8488 | 23.25 |
| 18.8513 | 20.25 | 18.88   | 24    |
| 18.8888 | 16.25 | 18.9163 | 24.75 |
| 18.9225 | 12.5  | 18.9488 | 25.75 |
| 18.9588 | 14    | 18.9838 | 23.5  |
| 18.99   | 13.25 | 19.0188 | 27    |
| 19.02   | 17    | 19.0488 | 24    |
| 19.055  | 13.5  | 19.0788 | 28    |
| 19.0888 | 10.75 | 19.1125 | 26.5  |
| 19.12   | 14.25 | 19.1463 | 24    |
| 19.1538 | 14.5  | 19.1763 | 24.5  |
| 19.1913 | 15.75 | 19.2175 | 25.75 |
| 19.225  | 13    | 19.2525 | 31.25 |
| 19.255  | 15.75 | 19.2838 | 25.75 |
| 19.2888 | 13.5  | 19.315  | 27    |
| 19.32   | 17.75 | 19.35   | 29.75 |
| 19.3513 | 12.25 | 19.3838 | 26.25 |
| 19.3888 | 16.5  | 19.4175 | 27.5  |
| 19.4238 | 15.5  | 19.45   | 27    |
| 19.4588 | 15    | 19.485  | 31    |
| 19.49   | 13    | 19.5225 | 28.25 |
| 19.52   | 17.75 | 19.5513 | 25    |
| 19.555  | 17.25 | 19.5813 | 28.75 |
| 19.5888 | 20.75 | 19.6138 | 29.75 |
| 19.62   | 17.5  | 19.6488 | 25.5  |
| 19.6538 | 18.75 | 19.6788 | 31.5  |
| 19.6913 | 14.25 | 19.715  | 33    |
| 19.725  | 16.75 | 19.75   | 30.5  |
| 19.755  | 14    | 19.7838 | 27.75 |
| 19.7888 | 15    | 19.815  | 33.5  |
| 19.82   | 14.25 | 19.85   | 29.5  |
| 19.8513 | 17    | 19.8838 | 36.5  |
| 19.8888 | 18.25 | 19.9175 | 33.75 |
| 19.9225 | 15.75 | 19.95   | 30.25 |

|         |       |         |       |
|---------|-------|---------|-------|
| 19.9588 | 14.75 | 19.985  | 38.5  |
| 19.99   | 12.25 | 20.0213 | 31    |
| 20.02   | 15.5  | 20.0513 | 35.25 |
| 20.055  | 10.75 | 20.0813 | 33.25 |
| 20.0888 | 9.5   | 20.1138 | 35.5  |
| 20.12   | 9.25  | 20.1488 | 31.5  |
| 20.1538 | 11.25 | 20.1788 | 32.25 |
| 20.1913 | 11    | 20.215  | 38.5  |
| 20.225  | 16.75 | 20.25   | 36.5  |
| 20.2563 | 17    | 20.2838 | 35.75 |
| 20.29   | 17.5  | 20.3163 | 36    |
| 20.3225 | 12.5  | 20.35   | 35    |
| 20.3538 | 17    | 20.3838 | 37    |
| 20.39   | 15.5  | 20.4175 | 33.5  |
| 20.4275 | 14.25 | 20.45   | 37.75 |
| 20.4613 | 17.5  | 20.485  | 33.75 |
| 20.4925 | 11.75 | 20.5213 | 32.25 |
| 20.5225 | 15.25 | 20.5513 | 30    |
| 20.555  | 13.75 | 20.5813 | 35.25 |
| 20.59   | 13.25 | 20.615  | 31.25 |
| 20.6213 | 12.5  | 20.6488 | 30.5  |
| 20.655  | 14    | 20.6788 | 31.5  |
| 20.6938 | 14.75 | 20.715  | 34.25 |
| 20.7263 | 14.25 | 20.75   | 33.25 |
| 20.7563 | 12.25 | 20.7838 | 29.25 |
| 20.79   | 15.25 | 20.815  | 34    |
| 20.8225 | 15    | 20.85   | 31.25 |
| 20.8538 | 11.5  | 20.8838 | 33.25 |
| 20.89   | 10.75 | 20.9175 | 30.5  |
| 20.9275 | 13.25 | 20.95   | 34.5  |
| 20.9613 | 13    | 20.985  | 29.5  |
| 20.9925 | 9.25  | 21.0213 | 32.5  |
| 21.0225 | 10.5  | 21.0513 | 33.5  |
| 21.055  | 8.25  | 21.0813 | 31    |
| 21.09   | 13    | 21.115  | 30    |
| 21.1213 | 13.25 | 21.1488 | 32.5  |
| 21.155  | 13.75 | 21.1788 | 24.5  |
| 21.1938 | 11.5  | 21.215  | 30.5  |
| 21.2263 | 12.5  | 21.25   | 29.75 |
| 21.2563 | 13.25 | 21.2863 | 29.25 |
| 21.29   | 11.5  | 21.315  | 29.5  |
| 21.3225 | 12.5  | 21.35   | 27.25 |
| 21.3538 | 10.25 | 21.385  | 29.75 |
| 21.39   | 12    | 21.4175 | 25    |
| 21.4275 | 14.75 | 21.45   | 26.75 |
| 21.4613 | 14.5  | 21.4825 | 26.75 |
| 21.4925 | 15.25 | 21.5188 | 29    |
| 21.5225 | 14.75 | 21.5513 | 27.25 |
| 21.555  | 13    | 21.5813 | 28.5  |
| 21.59   | 12.75 | 21.615  | 31.5  |

|         |       |         |       |
|---------|-------|---------|-------|
| 21.6213 | 13.5  | 21.6488 | 30.75 |
| 21.655  | 13    | 21.6813 | 32.75 |
| 21.6938 | 14.5  | 21.715  | 28.5  |
| 21.7263 | 14    | 21.75   | 32    |
| 21.7563 | 14.5  | 21.7838 | 30.25 |
| 21.79   | 16.75 | 21.815  | 30.25 |
| 21.8213 | 13    | 21.8475 | 33.5  |
| 21.8538 | 15.5  | 21.885  | 29.5  |
| 21.89   | 14.5  | 21.9175 | 28    |
| 21.9275 | 14.75 | 21.9525 | 28.5  |
| 21.9613 | 16.25 | 21.9825 | 31.75 |
| 21.9925 | 15.25 | 22.0188 | 27.75 |
| 22.0225 | 16.75 | 22.0513 | 25.75 |
| 22.055  | 14    | 22.0813 | 30    |
| 22.09   | 19    | 22.115  | 26    |
| 22.1213 | 14.25 | 22.1488 | 26.75 |
| 22.155  | 15.75 | 22.1813 | 27.5  |
| 22.1938 | 12    | 22.215  | 27.5  |
| 22.2263 | 12.25 | 22.25   | 24    |
| 22.2563 | 14.75 | 22.2838 | 23.75 |
| 22.29   | 12.75 | 22.315  | 24    |
| 22.3213 | 15    | 22.3475 | 24.5  |
| 22.3538 | 17.25 | 22.385  | 26.75 |
| 22.39   | 15.25 | 22.4175 | 24.75 |
| 22.4275 | 13.25 | 22.45   | 27.75 |
| 22.4613 | 19.25 | 22.4825 | 31    |
| 22.4925 | 16.75 | 22.5213 | 21.25 |
| 22.5225 | 13.25 | 22.5513 | 29.25 |
| 22.555  | 16.5  | 22.5813 | 29.25 |
| 22.59   | 18.5  | 22.615  | 27.75 |
| 22.6213 | 18    | 22.6488 | 30.5  |
| 22.655  | 15    | 22.6813 | 35.5  |
| 22.6938 | 21.5  | 22.715  | 30.75 |
| 22.7263 | 17.5  | 22.75   | 31.25 |
| 22.7563 | 14    | 22.7838 | 28.75 |
| 22.79   | 16.75 | 22.815  | 28    |
| 22.8213 | 16    | 22.8475 | 28.5  |
| 22.8538 | 16.25 | 22.885  | 24.75 |
| 22.89   | 14.25 | 22.9175 | 28.5  |
| 22.9275 | 17.25 | 22.95   | 29.75 |
| 22.9613 | 13.75 | 22.98   | 25.5  |
| 22.9925 | 16    | 23.0188 | 25.5  |
| 23.0225 | 17.75 | 23.0513 | 24.25 |
| 23.055  | 17.5  | 23.0813 | 29    |
| 23.0875 | 16    | 23.1175 | 30.5  |
| 23.1213 | 18.5  | 23.1488 | 32.5  |
| 23.155  | 18.75 | 23.1813 | 30.25 |
| 23.1938 | 19    | 23.215  | 30    |
| 23.2275 | 19.25 | 23.2488 | 28    |
| 23.2563 | 11.25 | 23.2825 | 26.75 |

|         |       |         |       |
|---------|-------|---------|-------|
| 23.29   | 15.5  | 23.315  | 28.25 |
| 23.3213 | 14.25 | 23.3475 | 29    |
| 23.3538 | 15.75 | 23.385  | 30.5  |
| 23.39   | 11.75 | 23.4175 | 32.25 |
| 23.4275 | 13.5  | 23.45   | 33    |
| 23.4613 | 15.5  | 23.48   | 29.5  |
| 23.4925 | 10.75 | 23.5188 | 35.75 |
| 23.5225 | 12.5  | 23.5525 | 28.5  |
| 23.555  | 17    | 23.5813 | 31    |
| 23.5875 | 18.5  | 23.615  | 31    |
| 23.6213 | 18    | 23.6488 | 35.25 |
| 23.655  | 22.25 | 23.6813 | 30.5  |
| 23.6938 | 20.75 | 23.7175 | 31    |
| 23.7263 | 18.5  | 23.7488 | 30.5  |
| 23.7563 | 20.25 | 23.7825 | 32    |
| 23.79   | 21.5  | 23.815  | 28.75 |
| 23.8225 | 19    | 23.8475 | 24.75 |
| 23.8538 | 20.75 | 23.885  | 24.25 |
| 23.89   | 16.5  | 23.9175 | 23.5  |
| 23.925  | 18.25 | 23.95   | 26    |
| 23.9588 | 19.75 | 23.98   | 23.25 |
| 23.9925 | 23.25 | 24.0188 | 31    |
| 24.0225 | 20.75 | 24.0513 | 28.75 |
| 24.055  | 17.5  | 24.0813 | 30.25 |
| 24.0875 | 20    | 24.115  | 26.5  |
| 24.1213 | 20    | 24.1488 | 32.75 |
| 24.155  | 20    | 24.1813 | 33    |
| 24.1938 | 19    | 24.215  | 23.75 |
| 24.2263 | 18.25 | 24.2513 | 29.25 |
| 24.2563 | 14.75 | 24.2825 | 28.25 |
| 24.29   | 19.5  | 24.315  | 28.25 |
| 24.3225 | 19.25 | 24.3475 | 28.5  |
| 24.3538 | 19.25 | 24.385  | 30.5  |
| 24.3888 | 20.75 | 24.4175 | 29.25 |
| 24.425  | 17    | 24.45   | 25.25 |
| 24.4588 | 18.25 | 24.48   | 28.75 |
| 24.4925 | 19.75 | 24.5188 | 26    |
| 24.5225 | 22    | 24.5513 | 26    |
| 24.555  | 17.25 | 24.5813 | 29.5  |
| 24.5875 | 18.75 | 24.615  | 27.75 |
| 24.6213 | 20.25 | 24.6488 | 28.75 |
| 24.655  | 19.25 | 24.6813 | 29.5  |
| 24.6938 | 16    | 24.715  | 23.25 |
| 24.7263 | 18.75 | 24.7475 | 28.5  |
| 24.7563 | 16.25 | 24.7825 | 27.5  |
| 24.79   | 17.5  | 24.815  | 28    |
| 24.8225 | 18.75 | 24.8475 | 29.5  |
| 24.8525 | 17    | 24.885  | 31.5  |
| 24.8888 | 19.25 | 24.9175 | 27    |
| 24.925  | 18    | 24.95   | 23.5  |

|         |       |         |       |
|---------|-------|---------|-------|
| 24.9588 | 16.25 | 24.98   | 21.5  |
| 24.9925 | 17.25 | 25.0188 | 24.5  |
| 25.0225 | 16    | 25.0488 | 25.25 |
| 25.055  | 17    | 25.0813 | 23.5  |
| 25.0875 | 17.5  | 25.115  | 26    |
| 25.1213 | 13.75 | 25.1488 | 28.5  |
| 25.155  | 14.25 | 25.1813 | 26    |
| 25.1938 | 17.5  | 25.215  | 29.75 |
| 25.2263 | 16.5  | 25.2475 | 23.5  |
| 25.2563 | 18.75 | 25.2825 | 30.25 |
| 25.29   | 18    | 25.315  | 25    |
| 25.3225 | 11.75 | 25.3475 | 28.75 |
| 25.3525 | 16.25 | 25.385  | 29    |
| 25.3888 | 15.25 | 25.4175 | 23.75 |
| 25.4263 | 15    | 25.45   | 26.25 |
| 25.4613 | 15.75 | 25.48   | 23.25 |
| 25.4925 | 10.5  | 25.5188 | 26.75 |
| 25.5225 | 14.5  | 25.5488 | 25.75 |
| 25.555  | 17.25 | 25.5813 | 26.5  |
| 25.5875 | 19.25 | 25.615  | 24.75 |
| 25.6188 | 19    | 25.6488 | 24.75 |
| 25.655  | 17.25 | 25.6838 | 22.25 |
| 25.6938 | 14.25 | 25.7163 | 26.5  |
| 25.7263 | 17.5  | 25.75   | 25.75 |
| 25.7563 | 14.75 | 25.785  | 23.5  |
| 25.79   | 14    | 25.8163 | 27.5  |
| 25.8225 | 19.5  | 25.8488 | 21.25 |
| 25.8525 | 17.5  | 25.8863 | 23.5  |
| 25.8888 | 13.75 | 25.9188 | 20.25 |
| 25.925  | 14.25 | 25.9525 | 28    |
| 25.9588 | 13.5  | 25.9825 | 23    |
| 25.9925 | 15.25 | 26.02   | 28    |
| 26.0225 | 14.25 | 26.0513 | 24.75 |
| 26.055  | 16.5  | 26.0838 | 27.5  |
| 26.0875 | 11.25 | 26.1175 | 23.5  |
| 26.1188 | 17    | 26.1513 | 24.75 |
| 26.155  | 14.75 | 26.1838 | 26.5  |
| 26.1925 | 15.75 | 26.2163 | 26.25 |
| 26.2263 | 12.75 | 26.25   | 29.75 |
| 26.2563 | 14    | 26.285  | 31.5  |
| 26.29   | 16.5  | 26.3163 | 29.25 |
| 26.3225 | 19.25 | 26.3513 | 35.25 |
| 26.3525 | 14.75 | 26.3863 | 28.75 |
| 26.3888 | 15.25 | 26.42   | 25.75 |
| 26.425  | 17.75 | 26.4525 | 24.5  |
| 26.4588 | 17.5  | 26.4825 | 21.75 |
| 26.4925 | 15.75 | 26.52   | 23.5  |
| 26.5225 | 13.5  | 26.5513 | 22.75 |
| 26.555  | 15    | 26.5838 | 19.75 |
| 26.5875 | 11    | 26.6163 | 24.75 |



|         |       |         |       |
|---------|-------|---------|-------|
| 26.62   | 13.75 | 26.6513 | 28    |
| 26.655  | 15.25 | 26.6838 | 24.75 |
| 26.6925 | 12    | 26.7163 | 26.25 |
| 26.7263 | 12.75 | 26.75   | 25.75 |
| 26.7563 | 16.25 | 26.785  | 25    |
| 26.79   | 16.25 | 26.8163 | 26    |
| 26.8225 | 15    | 26.8488 | 30.75 |
| 26.8525 | 16.25 | 26.8863 | 27.5  |
| 26.8875 | 16.25 | 26.92   | 25.5  |
| 26.925  | 22.25 | 26.9538 | 28.75 |
| 26.9588 | 18.75 | 26.9825 | 32    |
| 26.9925 | 18.75 | 27.02   | 26    |
| 27.0225 | 15.5  | 27.0513 | 26.5  |
| 27.055  | 20    | 27.0838 | 27.25 |
| 27.0875 | 17.5  | 27.1163 | 28    |
| 27.1188 | 20.25 | 27.1513 | 29.25 |
| 27.155  | 16.25 | 27.1838 | 29.75 |
| 27.1925 | 17.5  | 27.2163 | 28.5  |
| 27.2263 | 15    | 27.25   | 31.75 |
| 27.2563 | 19    | 27.285  | 29.75 |
| 27.29   | 21.25 | 27.3163 | 28.5  |
| 27.3225 | 15.5  | 27.3513 | 26    |
| 27.3525 | 17.75 | 27.3863 | 30.25 |
| 27.3875 | 15.25 | 27.42   | 25    |
| 27.425  | 16    | 27.4525 | 25.25 |
| 27.4588 | 19.5  | 27.4825 | 23.75 |
| 27.4925 | 16    | 27.52   | 27    |
| 27.5225 | 16.5  | 27.5513 | 24.5  |
| 27.555  | 15.75 | 27.5838 | 29.25 |
| 27.5875 | 19.25 | 27.6163 | 25.5  |
| 27.6188 | 15.5  | 27.6513 | 26.75 |
| 27.655  | 18    | 27.6838 | 28.25 |
| 27.6925 | 15.5  | 27.7163 | 26    |
| 27.7263 | 13.5  | 27.75   | 25.5  |
| 27.7563 | 20.75 | 27.785  | 24.25 |
| 27.79   | 18    | 27.815  | 23.5  |
| 27.8225 | 19.25 | 27.8488 | 26.75 |
| 27.8525 | 16    | 27.8863 | 25.75 |
| 27.8875 | 19.25 | 27.92   | 29    |
| 27.925  | 14.75 | 27.9525 | 28    |
| 27.9588 | 17    | 27.9825 | 23.75 |
| 27.9925 | 15.75 | 28.0175 | 27.75 |
| 28.0225 | 16.5  | 28.0513 | 24.5  |
| 28.055  | 17    | 28.0838 | 29    |
| 28.0875 | 12.75 | 28.1188 | 32.25 |
| 28.1188 | 17.5  | 28.1513 | 26.5  |
| 28.1525 | 14.75 | 28.1838 | 28    |
| 28.1925 | 16.25 | 28.2163 | 30.75 |
| 28.2263 | 19.75 | 28.25   | 31.25 |
| 28.2563 | 14.75 | 28.285  | 27.75 |

|         |       |         |       |
|---------|-------|---------|-------|
| 28.29   | 15.75 | 28.315  | 29.25 |
| 28.3225 | 18.25 | 28.3488 | 29.5  |
| 28.3525 | 18.25 | 28.3863 | 28.25 |
| 28.3875 | 18.25 | 28.42   | 25.25 |
| 28.425  | 18    | 28.4525 | 28    |
| 28.4588 | 18    | 28.4825 | 30.5  |
| 28.4925 | 14.75 | 28.5175 | 30    |
| 28.5225 | 16.5  | 28.5513 | 31    |
| 28.555  | 17.75 | 28.5838 | 28    |
| 28.5875 | 18    | 28.6188 | 29    |
| 28.6188 | 14    | 28.6513 | 27.5  |
| 28.65   | 14    | 28.6863 | 27.5  |
| 28.6925 | 11.25 | 28.7163 | 32.5  |
| 28.7263 | 19.75 | 28.75   | 26.25 |
| 28.7563 | 18.25 | 28.785  | 30.5  |
| 28.79   | 18.5  | 28.815  | 25.75 |
| 28.8225 | 18.25 | 28.8488 | 29    |
| 28.8525 | 17.75 | 28.8863 | 29    |
| 28.8875 | 15.75 | 28.92   | 30    |
| 28.925  | 18    | 28.9525 | 33    |
| 28.9588 | 17.25 | 28.9825 | 31.25 |
| 28.9925 | 21.5  | 29.0175 | 27.5  |
| 29.0225 | 17.5  | 29.0513 | 26    |
| 29.055  | 15    | 29.0838 | 30.75 |
| 29.0875 | 13.25 | 29.1188 | 25    |
| 29.1188 | 17.75 | 29.1513 | 34.25 |
| 29.15   | 15.25 | 29.1863 | 27.25 |
| 29.1925 | 17.25 | 29.2163 | 29.25 |
| 29.2263 | 18.75 | 29.2475 | 28.5  |
| 29.2563 | 18    | 29.285  | 27.5  |
| 29.29   | 15.25 | 29.315  | 31.5  |
| 29.3225 | 19    | 29.3488 | 28    |
| 29.3525 | 16.25 | 29.3863 | 30    |
| 29.3875 | 22    | 29.4225 | 35    |
| 29.425  | 17.75 | 29.4525 | 23.75 |
| 29.4588 | 17.25 | 29.4825 | 27.5  |
| 29.4925 | 17.25 | 29.5175 | 24    |
| 29.5225 | 12.5  | 29.5513 | 34    |
| 29.555  | 15.75 | 29.5875 | 31.25 |
| 29.5875 | 16.25 | 29.6188 | 31.75 |
| 29.6188 | 12    | 29.6513 | 28.75 |
| 29.65   | 11.75 | 29.6838 | 26.5  |
| 29.6925 | 16    | 29.7163 | 25.25 |
| 29.7263 | 16.5  | 29.7475 | 26.25 |
| 29.7563 | 14.75 | 29.785  | 25.25 |
| 29.79   | 18.25 | 29.8175 | 23.5  |
| 29.8225 | 19    | 29.8488 | 27.75 |
| 29.8525 | 16    | 29.8863 | 28.25 |
| 29.8875 | 20.5  | 29.92   | 28    |
| 29.9225 | 16.75 | 29.9525 | 26.25 |

|         |       |         |       |
|---------|-------|---------|-------|
| 29.9588 | 16.5  | 29.9825 | 34.25 |
| 29.9938 | 17.5  | 30.0175 | 25.75 |
| 30.0238 | 13.75 | 30.0513 | 31    |
| 30.055  | 14.75 | 30.0838 | 25.5  |
| 30.0875 | 15.75 | 30.1188 | 31.25 |
| 30.1188 | 17.75 | 30.1513 | 30.75 |
| 30.15   | 12.75 | 30.1838 | 29    |
| 30.1925 | 16.25 | 30.2163 | 32.75 |
| 30.2263 | 16    | 30.2475 | 26.25 |
| 30.2563 | 15.75 | 30.2838 | 34    |
| 30.29   | 15    | 30.315  | 30.75 |
| 30.3225 | 13.25 | 30.3488 | 32.25 |
| 30.3525 | 17    | 30.3863 | 26.25 |
| 30.3875 | 16.25 | 30.42   | 23.5  |
| 30.4225 | 19.75 | 30.4525 | 27.5  |
| 30.4563 | 17.25 | 30.4825 | 25    |
| 30.4925 | 16.5  | 30.5175 | 30.75 |
| 30.5225 | 16    | 30.5513 | 29    |
| 30.555  | 17    | 30.5838 | 31.25 |
| 30.5875 | 18    | 30.6188 | 28    |
| 30.6188 | 16.5  | 30.6513 | 27.25 |
| 30.65   | 18    | 30.6838 | 34.75 |
| 30.6925 | 20.25 | 30.7163 | 28    |
| 30.7263 | 17.75 | 30.7475 | 24    |
| 30.7563 | 14.25 | 30.7838 | 24.5  |
| 30.79   | 17    | 30.815  | 29    |
| 30.8225 | 18    | 30.8488 | 26.25 |
| 30.8525 | 16.5  | 30.8863 | 29.5  |
| 30.8875 | 15.75 | 30.92   | 29.25 |
| 30.9225 | 21.25 | 30.9525 | 25.75 |
| 30.9563 | 17.75 | 30.9825 | 26.75 |
| 30.9925 | 19.75 | 31.0175 | 31.75 |
| 31.0225 | 19.5  | 31.0513 | 25.25 |
| 31.055  | 18.5  | 31.0813 | 28.75 |
| 31.0875 | 22.5  | 31.1188 | 30    |
| 31.1188 | 21.25 | 31.1513 | 26.25 |
| 31.15   | 15.75 | 31.1838 | 28.25 |
| 31.1925 | 15    | 31.2163 | 25    |
| 31.2263 | 16.25 | 31.2475 | 32    |
| 31.2563 | 15    | 31.2838 | 25    |
| 31.29   | 17    | 31.315  | 27.5  |
| 31.3225 | 16.25 | 31.3488 | 28.75 |
| 31.3525 | 13.5  | 31.3863 | 24.75 |
| 31.3875 | 16    | 31.42   | 28.25 |
| 31.4225 | 14.5  | 31.4525 | 28.5  |
| 31.4563 | 11.75 | 31.4825 | 31.5  |
| 31.4925 | 17.75 | 31.5175 | 22.5  |
| 31.5225 | 16.25 | 31.5513 | 27.25 |
| 31.555  | 17    | 31.5813 | 30.75 |
| 31.5875 | 17.5  | 31.6188 | 28    |

|         |       |         |       |
|---------|-------|---------|-------|
| 31.6188 | 18.25 | 31.6513 | 27.75 |
| 31.65   | 20.75 | 31.6838 | 28.75 |
| 31.6925 | 20.5  | 31.7163 | 29    |
| 31.7263 | 19.75 | 31.7475 | 29.75 |
| 31.7563 | 19    | 31.7838 | 29.25 |
| 31.79   | 20.5  | 31.815  | 27.25 |
| 31.8225 | 17.5  | 31.8488 | 28.5  |
| 31.8525 | 12.75 | 31.8863 | 29.75 |
| 31.8875 | 15.75 | 31.92   | 25.75 |
| 31.9213 | 18.25 | 31.9525 | 28.25 |
| 31.9563 | 17    | 31.9825 | 26.5  |
| 31.9925 | 15    | 32.0175 | 24    |
| 32.0225 | 13.25 | 32.0513 | 21    |
| 32.055  | 16.5  | 32.0813 | 25.75 |
| 32.0875 | 18.25 | 32.1188 | 30.5  |
| 32.1188 | 17.5  | 32.1513 | 25.75 |
| 32.15   | 17.25 | 32.1838 | 24.75 |
| 32.1913 | 19.5  | 32.2163 | 23    |
| 32.2263 | 19.75 | 32.2475 | 23    |
| 32.2563 | 19    | 32.2838 | 27    |
| 32.29   | 18.75 | 32.315  | 21.75 |
| 32.3225 | 18.75 | 32.3488 | 19.25 |
| 32.3525 | 15    | 32.3863 | 19.5  |
| 32.3875 | 24.25 | 32.42   | 23.25 |
| 32.4213 | 20.25 | 32.4525 | 25.75 |
| 32.4563 | 16.5  | 32.4825 | 22    |
| 32.4925 | 21.5  | 32.5163 | 22    |
| 32.5225 | 20.5  | 32.5513 | 23.75 |
| 32.555  | 18.75 | 32.5813 | 26    |
| 32.5875 | 20.25 | 32.6188 | 26.5  |
| 32.6188 | 17.75 | 32.6513 | 25    |
| 32.65   | 20    | 32.6838 | 24    |
| 32.6913 | 17.75 | 32.7163 | 25.75 |
| 32.7263 | 16.5  | 32.7475 | 24    |
| 32.7563 | 18.5  | 32.785  | 24.5  |
| 32.79   | 13.75 | 32.815  | 25.75 |
| 32.8225 | 16.75 | 32.8488 | 25.5  |
| 32.8538 | 15.25 | 32.8863 | 22.75 |
| 32.8888 | 13.5  | 32.92   | 21.5  |
| 32.9238 | 15.75 | 32.9525 | 22.75 |
| 32.9575 | 15.25 | 32.9825 | 20.25 |
| 32.995  | 14.75 | 33.0163 | 25.5  |
| 33.025  | 16    | 33.0488 | 26    |
| 33.0575 | 16.75 | 33.0813 | 28.75 |
| 33.09   | 12.75 | 33.1188 | 26.25 |
| 33.1213 | 13.75 | 33.1513 | 22.5  |
| 33.1525 | 14.25 | 33.1838 | 24    |
| 33.195  | 16    | 33.2163 | 26.5  |
| 33.2288 | 14.25 | 33.2488 | 28    |
| 33.2588 | 14.5  | 33.2838 | 29    |

|         |       |         |       |
|---------|-------|---------|-------|
| 33.2913 | 15.5  | 33.315  | 28.5  |
| 33.3238 | 15.5  | 33.3488 | 29.25 |
| 33.3538 | 15.5  | 33.3863 | 27.5  |
| 33.3888 | 17    | 33.42   | 29.25 |
| 33.4238 | 17.25 | 33.4525 | 27.75 |
| 33.4575 | 14    | 33.4825 | 26    |
| 33.4938 | 20.5  | 33.5163 | 27.25 |
| 33.525  | 13.5  | 33.5488 | 31.5  |
| 33.5575 | 15.75 | 33.5813 | 29.5  |
| 33.59   | 17    | 33.6188 | 24.75 |
| 33.6213 | 17    | 33.6538 | 24    |
| 33.6525 | 17    | 33.6838 | 23    |
| 33.695  | 14.5  | 33.7163 | 25    |
| 33.7288 | 16.75 | 33.7488 | 27.5  |
| 33.7588 | 17.75 | 33.7838 | 28    |
| 33.7913 | 17.75 | 33.815  | 17.75 |
| 33.8238 | 16.25 | 33.8475 | 21.25 |
| 33.8538 | 15    | 33.8863 | 27    |
| 33.8888 | 13.75 | 33.92   | 30.5  |
| 33.9238 | 15.5  | 33.9525 | 22.5  |
| 33.9575 | 18.5  | 33.9825 | 24.25 |
| 33.9938 | 17    | 34.0163 | 25.75 |
| 34.025  | 16.5  | 34.0488 | 25.5  |
| 34.0575 | 17.75 | 34.0813 | 24.5  |
| 34.09   | 21    | 34.1188 | 24.75 |
| 34.1213 | 19.5  | 34.1513 | 28.25 |
| 34.1525 | 15.25 | 34.1838 | 24.75 |
| 34.195  | 20.75 | 34.2163 | 24    |
| 34.2288 | 18.5  | 34.2488 | 24.25 |
| 34.2588 | 22    | 34.2838 | 23.25 |
| 34.2913 | 19.25 | 34.315  | 24.5  |
| 34.3238 | 21.75 | 34.3475 | 24.25 |
| 34.3538 | 19.75 | 34.3863 | 23    |
| 34.3888 | 22    | 34.42   | 28.25 |
| 34.4238 | 19    | 34.4525 | 25.25 |
| 34.4575 | 20.5  | 34.4825 | 28.25 |
| 34.4938 | 14.5  | 34.5163 | 30.5  |
| 34.525  | 22.5  | 34.5488 | 27    |
| 34.5575 | 18    | 34.5813 | 24.25 |
| 34.59   | 22    | 34.6188 | 29.5  |
| 34.6213 | 20.5  | 34.6513 | 30.75 |
| 34.655  | 23.5  | 34.6838 | 28.5  |
| 34.695  | 21.5  | 34.7163 | 27    |
| 34.7288 | 18.5  | 34.7488 | 26.75 |
| 34.7588 | 19.75 | 34.7813 | 26.75 |
| 34.7913 | 21.25 | 34.815  | 25.25 |
| 34.8238 | 18.75 | 34.8525 | 31.25 |
| 34.8538 | 20.25 | 34.8888 | 22.75 |
| 34.8888 | 18.25 | 34.9225 | 23.5  |
| 34.9238 | 20.5  | 34.955  | 24.25 |

|         |       |         |       |
|---------|-------|---------|-------|
| 34.9575 | 20    | 34.985  | 23.25 |
| 34.9938 | 20.5  | 35.0175 | 20.5  |
| 35.025  | 18    | 35.05   | 24    |
| 35.0575 | 23    | 35.0825 | 22.75 |
| 35.09   | 22.25 | 35.1213 | 24.5  |
| 35.1213 | 19.75 | 35.1525 | 24.5  |
| 35.155  | 19.25 | 35.185  | 20.5  |
| 35.1925 | 19.25 | 35.2175 | 26.5  |
| 35.2288 | 19.75 | 35.2513 | 24.25 |
| 35.2588 | 19.25 | 35.2838 | 25.5  |
| 35.2913 | 16.25 | 35.3175 | 23    |
| 35.3238 | 19.75 | 35.3525 | 24    |
| 35.3538 | 15    | 35.3913 | 21.25 |
| 35.3888 | 17    | 35.4225 | 31.75 |
| 35.4238 | 16.5  | 35.455  | 28.25 |
| 35.4575 | 14.25 | 35.485  | 27    |
| 35.4938 | 15    | 35.5175 | 26.5  |
| 35.525  | 17.25 | 35.55   | 29.25 |
| 35.5575 | 19.5  | 35.5825 | 27.75 |
| 35.59   | 13.75 | 35.6188 | 27    |
| 35.6213 | 18    | 35.6525 | 24.75 |
| 35.655  | 19.5  | 35.685  | 24.25 |
| 35.6925 | 18.75 | 35.7175 | 27    |
| 35.7288 | 18.75 | 35.7513 | 28.75 |
| 35.7588 | 20.75 | 35.7838 | 21.75 |
| 35.7913 | 20.5  | 35.8175 | 26.75 |
| 35.8238 | 18    | 35.8525 | 26.5  |
| 35.8538 | 18.75 | 35.8888 | 27.75 |
| 35.89   | 19.75 | 35.9225 | 25    |
| 35.925  | 18.25 | 35.955  | 24    |
| 35.9588 | 19    | 35.985  | 22.5  |
| 35.995  | 19    | 36.0175 | 17.75 |
| 36.0263 | 15.75 | 36.05   | 21.75 |
| 36.06   | 18.25 | 36.0825 | 23.25 |
| 36.0925 | 21.75 | 36.1188 | 18.75 |
| 36.1238 | 16.75 | 36.1525 | 20.5  |
| 36.1575 | 17.75 | 36.1875 | 24.25 |
| 36.1975 | 18.25 | 36.2175 | 21.25 |
| 36.2313 | 16.25 | 36.2513 | 25.25 |
| 36.2613 | 17.75 | 36.285  | 24.25 |
| 36.2938 | 14.25 | 36.3163 | 25.25 |
| 36.325  | 19    | 36.3525 | 24    |
| 36.355  | 17.5  | 36.3888 | 19.25 |
| 36.39   | 16    | 36.4238 | 22.5  |
| 36.425  | 16.75 | 36.455  | 27.75 |
| 36.4588 | 17.5  | 36.4875 | 25    |
| 36.495  | 13.5  | 36.5175 | 23.5  |
| 36.5263 | 17.75 | 36.55   | 24.25 |
| 36.56   | 14.25 | 36.585  | 26.5  |
| 36.5925 | 16    | 36.6188 | 25    |

|         |       |         |       |
|---------|-------|---------|-------|
| 36.6238 | 14.5  | 36.6525 | 22.25 |
| 36.6575 | 13.25 | 36.685  | 17    |
| 36.6975 | 15.5  | 36.7175 | 23    |
| 36.7313 | 16    | 36.7513 | 23.25 |
| 36.7613 | 14    | 36.7838 | 25    |
| 36.7938 | 13    | 36.8163 | 24.5  |
| 36.825  | 15.5  | 36.8525 | 24    |
| 36.855  | 18.25 | 36.8888 | 28.25 |
| 36.89   | 17.5  | 36.9225 | 23.5  |
| 36.925  | 16    | 36.955  | 23.5  |
| 36.9588 | 20    | 36.9875 | 29.25 |
| 36.995  | 19.5  | 37.0175 | 34.25 |
| 37.0263 | 18.5  | 37.0475 | 28.5  |
| 37.06   | 19.25 | 37.0825 | 30.5  |
| 37.0925 | 17    | 37.1188 | 28    |
| 37.1238 | 15.25 | 37.1525 | 25    |
| 37.1575 | 15.5  | 37.1875 | 34    |
| 37.1975 | 15.25 | 37.2175 | 24.5  |
| 37.2313 | 14.5  | 37.2513 | 25.75 |
| 37.2613 | 14.5  | 37.2838 | 19.5  |
| 37.2938 | 18.5  | 37.3163 | 30    |
| 37.3238 | 15    | 37.3525 | 28.75 |
| 37.355  | 12.25 | 37.3875 | 27.75 |
| 37.39   | 15.5  | 37.4225 | 29.5  |
| 37.425  | 16.25 | 37.455  | 26    |
| 37.4588 | 14    | 37.4875 | 25.5  |
| 37.4963 | 14.75 | 37.5175 | 30.25 |
| 37.5263 | 17    | 37.5475 | 25.25 |
| 37.56   | 15.25 | 37.585  | 28    |
| 37.5925 | 18    | 37.6213 | 31.75 |
| 37.6238 | 17.75 | 37.655  | 30.5  |
| 37.6575 | 22.75 | 37.685  | 31.25 |
| 37.6975 | 15.25 | 37.7175 | 27.5  |
| 37.7313 | 18    | 37.7513 | 28.75 |
| 37.7613 | 20.75 | 37.7838 | 36.25 |
| 37.7938 | 20.5  | 37.8163 | 30.75 |
| 37.8238 | 17.75 | 37.8525 | 34.25 |
| 37.855  | 17.5  | 37.8875 | 32.5  |
| 37.89   | 20    | 37.9238 | 32    |
| 37.925  | 17.5  | 37.955  | 36.75 |
| 37.9588 | 18    | 37.9875 | 31.5  |
| 37.995  | 17.25 | 38.0175 | 31.25 |
| 38.0263 | 20.5  | 38.0475 | 27.25 |
| 38.06   | 18.75 | 38.085  | 27.5  |
| 38.0925 | 14    | 38.1188 | 32    |
| 38.1238 | 19    | 38.155  | 28    |
| 38.1575 | 16.5  | 38.185  | 30.25 |
| 38.1975 | 14.25 | 38.2175 | 26    |
| 38.2313 | 21    | 38.2513 | 28    |
| 38.2613 | 17.25 | 38.2838 | 36.75 |

|         |       |         |       |
|---------|-------|---------|-------|
| 38.2938 | 17.75 | 38.3163 | 30.25 |
| 38.3238 | 18.5  | 38.3525 | 32.75 |
| 38.355  | 16.25 | 38.39   | 32.5  |
| 38.39   | 15.5  | 38.4225 | 25    |
| 38.425  | 14.5  | 38.455  | 28.5  |
| 38.4588 | 14.75 | 38.4875 | 33.75 |
| 38.495  | 13.5  | 38.5175 | 29.5  |
| 38.5288 | 11.5  | 38.5475 | 30.25 |
| 38.56   | 16    | 38.5875 | 33.25 |
| 38.5925 | 17.25 | 38.6188 | 32.25 |
| 38.6238 | 14.5  | 38.6525 | 29.25 |
| 38.6575 | 17.5  | 38.685  | 31.25 |
| 38.6975 | 13.75 | 38.7175 | 32.75 |
| 38.73   | 17    | 38.7513 | 31.25 |
| 38.7613 | 19.25 | 38.7838 | 29.5  |
| 38.7938 | 15.5  | 38.815  | 31    |
| 38.8238 | 16.75 | 38.8525 | 29    |
| 38.855  | 21    | 38.8875 | 29.75 |
| 38.89   | 19    | 38.9225 | 29.75 |
| 38.925  | 21    | 38.955  | 27.5  |
| 38.9588 | 19.5  | 38.9875 | 32.75 |
| 38.995  | 14    | 39.0175 | 26.25 |
| 39.0263 | 18.25 | 39.0475 | 32    |
| 39.06   | 17    | 39.0875 | 28.5  |
| 39.0925 | 22.5  | 39.1188 | 34.75 |
| 39.1238 | 18.25 | 39.1525 | 31.75 |
| 39.1575 | 27    | 39.185  | 35.75 |
| 39.1975 | 16    | 39.2188 | 34.75 |
| 39.23   | 21    | 39.2513 | 34.75 |
| 39.2613 | 16    | 39.2838 | 28.25 |
| 39.2938 | 21    | 39.315  | 28    |
| 39.3238 | 18.25 | 39.3525 | 28.5  |
| 39.355  | 17    | 39.3875 | 28    |
| 39.39   | 18.75 | 39.4238 | 27.25 |
| 39.425  | 19.75 | 39.455  | 33    |
| 39.4588 | 13    | 39.4875 | 28    |
| 39.4963 | 14.25 | 39.5175 | 33    |
| 39.5263 | 16.25 | 39.5475 | 29.75 |
| 39.56   | 17    | 39.5875 | 30.5  |
| 39.5925 | 16.5  | 39.6188 | 33.75 |
| 39.6238 | 14    | 39.6525 | 32.25 |
| 39.6575 | 18.25 | 39.685  | 36    |
| 39.6975 | 17    | 39.7188 | 29.25 |
| 39.73   | 15.5  | 39.7513 | 32.25 |
| 39.7613 | 16    | 39.7838 | 31.5  |
| 39.7938 | 16.25 | 39.815  | 29.25 |
| 39.8238 | 15.5  | 39.8525 | 31.5  |
| 39.855  | 15.25 | 39.8875 | 44.75 |
| 39.8913 | 14.5  | 39.9225 | 35.75 |
| 39.925  | 14.5  | 39.955  | 31    |



|         |       |         |       |
|---------|-------|---------|-------|
| 39.9588 | 12.25 | 39.9875 | 34.25 |
| 39.995  | 10.5  | 40.0175 | 31    |
| 40.0263 | 12.25 | 40.0475 | 29.25 |
| 40.06   | 13.75 | 40.085  | 29    |
| 40.0925 | 11.75 | 40.12   | 26.25 |
| 40.1238 | 12.25 | 40.1525 | 29.5  |
| 40.1575 | 16.25 | 40.185  | 29.25 |
| 40.1975 | 12.75 | 40.2188 | 30.25 |
| 40.23   | 14    | 40.2513 | 29.25 |
| 40.2613 | 19.5  | 40.2838 | 24.25 |
| 40.2938 | 13.25 | 40.315  | 29    |
| 40.3238 | 18.75 | 40.3525 | 25.75 |
| 40.355  | 17    | 40.3875 | 32.25 |
| 40.3913 | 15    | 40.42   | 31.75 |
| 40.425  | 19    | 40.4563 | 33.25 |
| 40.4588 | 15    | 40.4875 | 32.25 |
| 40.4963 | 18    | 40.5175 | 30    |
| 40.5263 | 18.25 | 40.5475 | 27.75 |
| 40.56   | 21    | 40.5825 | 33.25 |
| 40.59   | 19.25 | 40.6188 | 32.75 |
| 40.6238 | 17.5  | 40.6525 | 28.5  |
| 40.6588 | 20.5  | 40.685  | 31.25 |
| 40.6975 | 17.25 | 40.7188 | 29.75 |
| 40.73   | 19.75 | 40.7513 | 31    |
| 40.7613 | 20.5  | 40.7838 | 29.5  |
| 40.7938 | 17.25 | 40.815  | 29.75 |
| 40.8238 | 16.5  | 40.8525 | 28    |
| 40.855  | 19.25 | 40.8863 | 28    |
| 40.8913 | 20    | 40.92   | 31.75 |
| 40.925  | 16.5  | 40.955  | 29    |
| 40.9588 | 19    | 40.9888 | 25    |
| 40.995  | 21    | 41.02   | 25.25 |
| 41.0263 | 15.5  | 41.05   | 20.25 |
| 41.06   | 18.75 | 41.0838 | 24.5  |
| 41.09   | 17.25 | 41.12   | 22    |
| 41.1238 | 18.5  | 41.155  | 24    |
| 41.1588 | 16.25 | 41.1875 | 25.5  |
| 41.1975 | 13.25 | 41.2238 | 23.5  |
| 41.23   | 15.75 | 41.2538 | 29.5  |
| 41.2613 | 17    | 41.285  | 26    |
| 41.2938 | 17    | 41.3188 | 27    |
| 41.3238 | 12.75 | 41.355  | 25.5  |
| 41.355  | 13.25 | 41.3913 | 28.25 |
| 41.3913 | 16.75 | 41.4213 | 24.75 |
| 41.425  | 13.75 | 41.4563 | 26    |
| 41.4588 | 16.75 | 41.4888 | 24.5  |
| 41.495  | 15.25 | 41.52   | 22.75 |
| 41.5263 | 16    | 41.5513 | 20.25 |
| 41.56   | 14.75 | 41.5838 | 23.25 |
| 41.59   | 13.25 | 41.62   | 24.25 |

|         |       |         |       |
|---------|-------|---------|-------|
| 41.6238 | 14.5  | 41.655  | 25.5  |
| 41.6588 | 13    | 41.6875 | 24    |
| 41.695  | 15    | 41.7213 | 28.25 |
| 41.73   | 14    | 41.7538 | 24    |
| 41.7613 | 13    | 41.785  | 23.75 |
| 41.7938 | 15    | 41.8188 | 27.75 |
| 41.8238 | 14    | 41.855  | 27.5  |
| 41.855  | 13    | 41.8888 | 28.25 |
| 41.8913 | 15    | 41.9213 | 26.75 |
| 41.925  | 15    | 41.9563 | 29    |
| 41.9588 | 16    | 41.9888 | 27.75 |
| 41.9925 | 15.25 | 42.02   | 29.75 |
| 42.0263 | 17.75 | 42.0513 | 29    |
| 42.06   | 19    | 42.0838 | 29.25 |
| 42.09   | 17.75 | 42.12   | 27.75 |
| 42.1238 | 18.25 | 42.155  | 30    |
| 42.1588 | 20.5  | 42.1863 | 25.75 |
| 42.195  | 14    | 42.2213 | 30.75 |
| 42.23   | 15.5  | 42.2538 | 25.5  |
| 42.2613 | 11.75 | 42.285  | 26    |
| 42.2938 | 13.75 | 42.3188 | 29.25 |
| 42.3238 | 12.25 | 42.355  | 26.25 |
| 42.355  | 13.25 | 42.3888 | 26    |
| 42.3913 | 17.25 | 42.4213 | 24.5  |
| 42.425  | 15.25 | 42.4588 | 29.75 |
| 42.4588 | 13.25 | 42.4888 | 24.25 |
| 42.4925 | 16.5  | 42.52   | 23    |
| 42.5263 | 13    | 42.5513 | 26.5  |
| 42.56   | 15.5  | 42.5838 | 26    |
| 42.59   | 16.75 | 42.62   | 27    |
| 42.6238 | 18.25 | 42.655  | 20.5  |
| 42.6588 | 14.25 | 42.6863 | 23.75 |
| 42.695  | 16.25 | 42.7213 | 24.25 |
| 42.73   | 12.25 | 42.7538 | 28.75 |
| 42.7613 | 13.5  | 42.785  | 26.25 |
| 42.7938 | 13    | 42.8188 | 23.75 |
| 42.8238 | 15.75 | 42.855  | 28.25 |
| 42.855  | 15.5  | 42.8888 | 22.5  |
| 42.8913 | 12.75 | 42.9213 | 27.5  |
| 42.925  | 15.25 | 42.9588 | 23    |
| 42.9613 | 14.25 | 42.9888 | 23.75 |
| 42.9925 | 14.5  | 43.02   | 28    |
| 43.0263 | 10.75 | 43.0538 | 28.5  |
| 43.06   | 15.25 | 43.0838 | 25.25 |
| 43.09   | 17    | 43.12   | 27.75 |
| 43.1238 | 15    | 43.155  | 28.75 |
| 43.1588 | 13.75 | 43.1863 | 24.5  |
| 43.195  | 11.25 | 43.2213 | 22.5  |
| 43.23   | 16.75 | 43.2563 | 31.75 |
| 43.2613 | 13.25 | 43.2875 | 27.75 |

|         |       |         |       |
|---------|-------|---------|-------|
| 43.2938 | 12.5  | 43.3213 | 30.25 |
| 43.3238 | 20.5  | 43.3538 | 26    |
| 43.355  | 19.5  | 43.3913 | 29.25 |
| 43.3913 | 17.5  | 43.4238 | 31.25 |
| 43.425  | 19.5  | 43.4575 | 29.25 |
| 43.4613 | 17.75 | 43.49   | 35    |
| 43.4925 | 17    | 43.5213 | 30    |
| 43.5263 | 16.75 | 43.5525 | 30.25 |
| 43.56   | 17.75 | 43.5863 | 27    |
| 43.59   | 16.25 | 43.6238 | 22    |
| 43.625  | 21    | 43.6563 | 26.5  |
| 43.6588 | 22    | 43.6888 | 26.75 |
| 43.695  | 17.5  | 43.7238 | 32.5  |
| 43.73   | 17.75 | 43.7563 | 27.5  |
| 43.7613 | 17.75 | 43.7875 | 27.75 |
| 43.7938 | 20    | 43.8213 | 29.25 |
| 43.8238 | 20    | 43.8563 | 32    |
| 43.8538 | 22.5  | 43.8913 | 29    |
| 43.8913 | 17.5  | 43.9238 | 30.5  |
| 43.925  | 20.5  | 43.9575 | 30.75 |
| 43.9613 | 18    | 43.99   | 28    |
| 43.9925 | 19.75 | 44.0213 | 26.75 |
| 44.0263 | 21    | 44.0525 | 25.75 |
| 44.0625 | 21.25 | 44.0863 | 32.25 |
| 44.09   | 18.5  | 44.1238 | 28    |
| 44.1275 | 17.75 | 44.155  | 28.5  |
| 44.1588 | 18.5  | 44.1888 | 26.25 |
| 44.195  | 19.5  | 44.2238 | 25.25 |
| 44.23   | 19.25 | 44.2588 | 24.5  |
| 44.2613 | 18.75 | 44.29   | 21    |
| 44.2938 | 19.5  | 44.3213 | 29.25 |
| 44.3238 | 20.5  | 44.3563 | 26.5  |
| 44.3538 | 18.75 | 44.3913 | 30    |
| 44.3913 | 18.75 | 44.4238 | 30.25 |
| 44.425  | 19.25 | 44.4575 | 27.25 |
| 44.4613 | 17.5  | 44.49   | 32.25 |
| 44.4925 | 23.25 | 44.5213 | 29.25 |
| 44.5263 | 17.25 | 44.5525 | 28    |
| 44.56   | 18    | 44.5863 | 28.25 |
| 44.59   | 19.25 | 44.6238 | 28.25 |
| 44.6275 | 19.75 | 44.655  | 28.25 |
| 44.6588 | 20.75 | 44.6888 | 22.25 |
| 44.695  | 18    | 44.7263 | 27.75 |
| 44.73   | 17    | 44.7563 | 29.5  |
| 44.76   | 17.5  | 44.79   | 25    |
| 44.7938 | 16.75 | 44.8213 | 31.25 |
| 44.8238 | 14.25 | 44.8563 | 27.5  |
| 44.8538 | 20    | 44.8913 | 22.5  |
| 44.8938 | 20.75 | 44.9238 | 27    |
| 44.925  | 20.5  | 44.9575 | 26.75 |

|         |       |         |       |
|---------|-------|---------|-------|
| 44.9613 | 19.75 | 44.99   | 25.75 |
| 44.9925 | 17.25 | 45.0213 | 28.75 |
| 45.0263 | 17.5  | 45.0525 | 25.5  |
| 45.06   | 21.25 | 45.0863 | 27    |
| 45.09   | 18.75 | 45.1238 | 30.5  |
| 45.1275 | 17.75 | 45.155  | 22.5  |
| 45.1588 | 18.5  | 45.1888 | 28    |
| 45.1963 | 15.25 | 45.2225 | 27    |
| 45.2325 | 18.5  | 45.2563 | 27.5  |
| 45.26   | 20.25 | 45.29   | 27.5  |
| 45.2938 | 17.75 | 45.3213 | 28.25 |
| 45.3238 | 18.25 | 45.3563 | 27    |
| 45.3538 | 17.5  | 45.3913 | 30.75 |
| 45.3913 | 18    | 45.4238 | 23    |
| 45.425  | 20    | 45.4575 | 27.5  |
| 45.4613 | 19    | 45.49   | 27    |
| 45.4925 | 18.5  | 45.5213 | 25    |
| 45.5263 | 12.25 | 45.5525 | 28    |
| 45.56   | 14    | 45.5863 | 25.75 |
| 45.59   | 15.75 | 45.6238 | 28.25 |
| 45.6275 | 14.25 | 45.6563 | 31.25 |
| 45.6588 | 16.75 | 45.6888 | 29.25 |
| 45.6963 | 17.75 | 45.7225 | 25.5  |
| 45.73   | 17.25 | 45.7563 | 33.25 |
| 45.76   | 15    | 45.79   | 32    |
| 45.7938 | 13.5  | 45.8213 | 29.75 |
| 45.8238 | 14.25 | 45.8563 | 29.25 |
| 45.8538 | 15.5  | 45.8913 | 30.25 |
| 45.8913 | 13.25 | 45.9238 | 30    |
| 45.925  | 14    | 45.9575 | 31.25 |
| 45.9613 | 11.5  | 45.9913 | 31.25 |
| 45.9925 | 16.75 | 46.0213 | 30.25 |
| 46.0263 | 14.5  | 46.0525 | 24.5  |
| 46.06   | 18.25 | 46.0875 | 27.25 |
| 46.09   | 20.25 | 46.1188 | 22    |
| 46.1275 | 21    | 46.155  | 32.5  |
| 46.1588 | 18.75 | 46.1888 | 26.75 |
| 46.1963 | 20.25 | 46.2225 | 24    |
| 46.2313 | 22.75 | 46.2563 | 30.25 |
| 46.26   | 20.5  | 46.29   | 29.75 |
| 46.2938 | 17.25 | 46.3213 | 27    |
| 46.3238 | 18    | 46.3563 | 29.25 |
| 46.3538 | 20.5  | 46.3938 | 24.75 |
| 46.3938 | 21.5  | 46.4213 | 27.25 |
| 46.425  | 15.75 | 46.4575 | 27.25 |
| 46.4613 | 18.25 | 46.4875 | 28    |
| 46.4925 | 20.5  | 46.5225 | 31    |
| 46.5238 | 16.75 | 46.5525 | 30.75 |
| 46.56   | 15.5  | 46.5875 | 28.25 |
| 46.59   | 16    | 46.6188 | 31    |

|         |       |         |       |
|---------|-------|---------|-------|
| 46.6275 | 17.75 | 46.6563 | 27    |
| 46.6588 | 17.5  | 46.6888 | 29.25 |
| 46.6963 | 19.5  | 46.7225 | 29.5  |
| 46.73   | 15    | 46.7563 | 24.75 |
| 46.76   | 17    | 46.79   | 32.25 |
| 46.7938 | 20.5  | 46.8213 | 35    |
| 46.8238 | 19.5  | 46.8563 | 52.75 |
| 46.8538 | 16    | 46.8913 | 33.75 |
| 46.8938 | 16.5  |         |       |
| 46.9263 | 19.75 |         |       |
| 46.9613 | 20.25 | 46.9875 | 36    |
| 46.9925 | 20.75 |         |       |
| 47.0238 | 18.75 | 47.0525 | 33.25 |
| 47.06   | 18.5  | 47.0875 | 38.5  |
| 47.09   | 16.5  | 47.1188 | 32.5  |
| 47.125  | 16.5  | 47.155  | 32.75 |
| 47.1588 | 13    | 47.1888 | 50.25 |
| 47.1963 | 18.25 | 47.2225 | 47.25 |
| 47.23   | 17    | 47.2588 | 28.5  |
| 47.26   | 14.75 | 47.29   | 51    |
| 47.2938 | 18.5  | 47.3213 | 39.25 |
| 47.3238 | 15.5  | 47.3563 | 29.25 |
| 47.3538 | 15.25 | 47.3913 | 29.5  |
| 47.3938 | 13.5  | 47.4213 | 23    |
| 47.4288 | 12.75 | 47.4575 | 23.75 |
| 47.4613 | 14.25 | 47.4875 | 30.75 |
| 47.4925 | 14.25 | 47.5225 | 22.75 |
| 47.5238 | 14    | 47.5525 | 32.25 |
| 47.56   | 15.75 | 47.5875 | 33.75 |
| 47.59   | 15.5  | 47.6188 | 28.75 |
| 47.625  | 13.25 | 47.655  | 33.25 |
| 47.6588 | 16.75 | 47.6888 | 29    |
| 47.6988 | 13    | 47.7225 | 31.75 |
| 47.73   | 12.75 | 47.7563 | 34.75 |
| 47.76   | 12.5  | 47.79   | 28.75 |
| 47.7938 | 15.5  | 47.8213 | 28.25 |
| 47.8238 | 15.75 | 47.8575 | 28    |
| 47.8563 | 11.5  | 47.8913 | 37.5  |
| 47.8938 | 12.5  | 47.9213 | 32.5  |
| 47.9288 | 14.25 | 47.9575 | 35.5  |
| 47.9613 | 16.75 | 47.9875 | 32.75 |
| 47.9925 | 15.5  | 48.0225 | 28.5  |
| 48.0238 | 19    | 48.0525 | 33.75 |
| 48.06   | 16.25 | 48.0875 | 27.75 |
| 48.09   | 13.25 | 48.1188 | 25.25 |
| 48.125  | 13.25 | 48.155  | 27.25 |
| 48.1588 | 13.5  | 48.1888 | 28.5  |
| 48.1963 | 13.75 | 48.2225 | 23.25 |
| 48.23   | 11.75 | 48.255  | 24    |
| 48.26   | 11.75 | 48.29   | 30    |

|         |       |         |       |
|---------|-------|---------|-------|
| 48.2913 | 13.5  | 48.325  | 27    |
| 48.3238 | 11.5  | 48.3563 | 30.75 |
| 48.3563 | 16.75 | 48.3913 | 29.25 |
| 48.3938 | 11    | 48.4213 | 24.5  |
| 48.4288 | 13.25 | 48.4575 | 30.5  |
| 48.4613 | 14.5  | 48.4875 | 26    |
| 48.4925 | 18    | 48.5225 | 28.5  |
| 48.5238 | 17.25 | 48.5525 | 27.75 |
| 48.56   | 15.75 | 48.5875 | 29.75 |
| 48.59   | 17.25 | 48.6188 | 28    |
| 48.625  | 17.25 | 48.6563 | 25.75 |
| 48.6613 | 16    | 48.6888 | 31    |
| 48.6963 | 16.25 | 48.7225 | 30    |
| 48.7325 | 18.5  | 48.755  | 26.5  |
| 48.7625 | 18.5  | 48.79   | 31    |
| 48.7925 | 21.25 | 48.8238 | 30    |
| 48.825  | 14    | 48.8563 | 23.75 |
| 48.8575 | 14    | 48.8913 | 27.75 |
| 48.895  | 19.75 | 48.9213 | 27.75 |
| 48.93   | 13.75 | 48.9575 | 25.75 |
| 48.9625 | 18.25 | 48.9875 | 25    |
| 48.9938 | 16.5  | 49.0225 | 25    |
| 49.0263 | 16.75 | 49.0525 | 26.25 |
| 49.0625 | 15.5  | 49.0875 | 22.25 |
| 49.0925 | 15    | 49.1213 | 29.75 |
| 49.13   | 14    | 49.155  | 26    |
| 49.1613 | 17.5  | 49.1875 | 27    |
| 49.1988 | 16.5  | 49.2225 | 24.75 |
| 49.2325 | 18.25 | 49.255  | 23.75 |
| 49.2625 | 20.5  | 49.29   | 24.5  |
| 49.2925 | 17.5  | 49.3238 | 23.5  |
| 49.325  | 17.25 | 49.3563 | 20.5  |
| 49.3575 | 15    | 49.3913 | 22.75 |
| 49.395  | 17.25 | 49.4213 | 21    |
| 49.43   | 17.75 | 49.4575 | 24.5  |
| 49.4625 | 19.75 | 49.4875 | 24    |
| 49.4938 | 17.5  | 49.5225 | 25    |
| 49.5263 | 15.25 | 49.5525 | 23    |
| 49.5625 | 19    | 49.5875 | 23.5  |
| 49.5925 | 16.5  | 49.6188 | 26    |
| 49.63   | 17.5  | 49.655  | 24    |
| 49.6613 | 18.75 | 49.6875 | 25    |
| 49.6988 | 19.25 | 49.7225 | 27.25 |
| 49.7325 | 21.75 | 49.7575 | 27.75 |
| 49.7625 | 18.5  | 49.79   | 28.25 |
| 49.7925 | 20.25 | 49.8238 | 26    |
| 49.825  | 17.5  | 49.8575 | 23.75 |
| 49.8575 | 18    | 49.8925 | 26.5  |
| 49.895  | 16    | 49.9225 | 26    |
| 49.93   | 14.5  | 49.9588 | 27.25 |

|         |       |         |       |
|---------|-------|---------|-------|
| 49.9625 | 16    | 49.99   | 29.5  |
| 49.9938 | 14.75 | 50.025  | 22.25 |
| 50.0263 | 14.75 | 50.055  | 20.75 |
| 50.0613 | 16.75 | 50.09   | 24.25 |
| 50.0925 | 15.5  | 50.1213 | 24.5  |
| 50.13   | 16    | 50.1575 | 22.5  |
| 50.1613 | 16.5  | 50.19   | 28.5  |
| 50.1988 | 17.25 | 50.225  | 27.75 |
| 50.2325 | 16    | 50.2588 | 24.25 |
| 50.2625 | 20    | 50.2913 | 23.75 |
| 50.2925 | 15.25 | 50.325  | 28.25 |
| 50.325  | 18.5  | 50.3575 | 24.75 |
| 50.3575 | 17.25 | 50.3925 | 23    |
| 50.395  | 16.5  | 50.4225 | 19    |
| 50.43   | 17.25 | 50.4588 | 23.75 |
| 50.4625 | 17.75 | 50.49   | 22    |
| 50.4938 | 14.75 | 50.5225 | 26.5  |
| 50.5263 | 17.75 | 50.5575 | 24.25 |
| 50.5613 | 21.5  | 50.59   | 24.5  |
| 50.5938 | 20    | 50.6213 | 25.5  |
| 50.6325 | 21.25 | 50.6588 | 22.5  |
| 50.6613 | 18.5  | 50.69   | 21.25 |
| 50.7013 | 17.5  | 50.725  | 25.75 |
| 50.7325 | 17.5  | 50.7588 | 22    |
| 50.7625 | 14.75 | 50.7913 | 22.5  |
| 50.7925 | 13    | 50.825  | 26.25 |
| 50.8263 | 15.5  | 50.8575 | 27.25 |
| 50.8575 | 14.75 | 50.8925 | 25    |
| 50.895  | 13.5  | 50.9225 | 27    |
| 50.93   | 11.5  | 50.9588 | 22.75 |
| 50.9625 | 14.5  | 50.99   | 25.5  |
| 50.9938 | 15.5  | 51.025  | 24    |
| 51.0263 | 15.75 | 51.06   | 21.75 |
| 51.0613 | 19    | 51.0925 | 23.75 |
| 51.0938 | 19.5  | 51.1238 | 26.25 |
| 51.13   | 17.25 | 51.16   | 24    |
| 51.1613 | 17.25 | 51.1913 | 21    |
| 51.1988 | 17.25 | 51.2263 | 22.5  |
| 51.2325 | 20    | 51.26   | 24.25 |
| 51.2625 | 18    | 51.295  | 22.25 |
| 51.2925 | 17.75 | 51.3263 | 24    |
| 51.325  | 18.25 | 51.3588 | 20.25 |
| 51.3575 | 16.5  | 51.3938 | 22.5  |
| 51.395  | 17.5  | 51.425  | 19.75 |
| 51.43   | 14.5  | 51.4613 | 23.25 |
| 51.4625 | 14.75 | 51.4925 | 23.5  |
| 51.4938 | 18.25 | 51.525  | 21.5  |
| 51.5263 | 14.5  | 51.56   | 21.5  |
| 51.5613 | 18    | 51.5925 | 22.5  |
| 51.5938 | 16.25 | 51.6238 | 21.75 |

|         |       |
|---------|-------|
| 51.63   | 19    |
| 51.6613 | 14.75 |
| 51.6988 | 19.25 |
| 51.7325 | 17.25 |
| 51.7625 | 15.75 |
| 51.7925 | 16.5  |
| 51.8225 | 18.75 |
| 51.8575 | 17.75 |
| 51.895  | 18    |
| 51.93   | 18    |
| 51.9625 | 17.25 |
| 51.9938 | 16    |
| 52.0288 | 18.25 |
| 52.0613 | 18.5  |
| 52.0938 | 16.25 |
| 52.13   | 17    |
| 52.1613 | 18.5  |
| 52.2013 | 15    |
| 52.2325 | 16.75 |
| 52.2625 | 16.5  |
| 52.2925 | 17.75 |
| 52.3225 | 18    |
| 52.3575 | 16.75 |
| 52.395  | 16.25 |
| 52.43   | 16    |
| 52.4625 | 19.75 |
| 52.4938 | 16.75 |
| 52.5263 | 17.75 |
| 52.5625 | 13.75 |
| 52.5938 | 14.5  |
| 52.63   | 16.25 |
| 52.6613 | 16.25 |
| 52.6988 | 16.75 |
| 52.7325 | 14.5  |
| 52.7625 | 15.5  |
| 52.7925 | 15.25 |
| 52.8225 | 17.75 |
| 52.8575 | 15.5  |
| 52.895  | 12.75 |
| 52.93   | 19.75 |
| 52.9625 | 18.75 |
| 52.9938 | 11.75 |
| 53.0275 | 14.75 |
| 53.0613 | 17    |
| 53.0925 | 17.5  |
| 53.13   | 15.75 |
| 53.1613 | 17    |
| 53.1988 | 16    |
| 53.2325 | 17.5  |
| 53.2625 | 18.5  |

|         |       |
|---------|-------|
| 51.66   | 25.5  |
| 51.6913 | 21.25 |
| 51.7263 | 25.75 |
| 51.76   | 29.25 |
| 51.795  | 23.25 |
| 51.8275 | 22.25 |
| 51.8588 | 24.25 |
| 51.8938 | 24.75 |
| 51.925  | 24    |
| 51.9613 | 27    |
| 51.995  | 30.5  |
| 52.0263 | 28.25 |
| 52.06   | 26    |
| 52.0925 | 34.75 |
| 52.1238 | 33    |
| 52.16   | 29.75 |
| 52.1913 | 31.75 |
| 52.2263 | 30    |
| 52.2625 | 30    |
| 52.295  | 27.5  |
| 52.3288 | 29    |
| 52.3588 | 32.25 |
| 52.3938 | 35.5  |
| 52.425  | 28    |
| 52.465  | 26.25 |
| 52.4925 | 29.25 |
| 52.5263 | 29.5  |
| 52.56   | 28.5  |
| 52.5925 | 25.5  |
| 52.6238 | 26.25 |
| 52.66   | 28.75 |
| 52.6913 | 28.5  |
| 52.7263 | 28.75 |
| 52.76   | 24.25 |
| 52.7925 | 23.75 |
| 52.8275 | 21.25 |
| 52.8588 | 26.25 |
| 52.8938 | 23.5  |
| 52.925  | 25    |
| 52.9638 | 24.5  |
| 52.9925 | 25.75 |
| 53.0263 | 24.5  |
| 53.0625 | 26.5  |
| 53.0925 | 21    |
| 53.1238 | 21.5  |
| 53.16   | 22    |
| 53.1913 | 25    |
| 53.2263 | 18.5  |
| 53.26   | 21.75 |
| 53.2925 | 17.75 |



|         |       |         |       |
|---------|-------|---------|-------|
| 53.2925 | 18.25 | 53.3275 | 21.5  |
| 53.325  | 20.75 | 53.3588 | 19    |
| 53.3575 | 19.25 | 53.3938 | 18    |
| 53.3963 | 14.75 | 53.425  | 19    |
| 53.43   | 15    | 53.4613 | 24    |
| 53.4625 | 18.5  | 53.4925 | 23    |
| 53.4938 | 17.75 | 53.5263 | 20    |
| 53.5263 | 14.5  | 53.56   | 20.5  |
| 53.5613 | 15.75 | 53.595  | 20.75 |
| 53.5925 | 15.5  | 53.6238 | 22.5  |
| 53.63   | 13.5  | 53.66   | 21.5  |
| 53.6613 | 19    | 53.6913 | 20.75 |
| 53.6988 | 17.5  | 53.7263 | 18.25 |
| 53.7325 | 12.5  | 53.7625 | 22.5  |
| 53.7625 | 15.75 | 53.7925 | 24    |
| 53.7925 | 14.5  | 53.8275 | 21.5  |
| 53.825  | 13.5  | 53.8588 | 25.75 |
| 53.8575 | 16.75 | 53.8925 | 26    |
| 53.895  | 10.75 | 53.925  | 25.75 |
| 53.93   | 15.5  | 53.9625 | 26.5  |
| 53.9625 | 14.5  | 53.9925 | 28    |
| 53.9938 | 17.25 | 54.0263 | 28.5  |
| 54.0263 | 17.5  | 54.06   | 25.5  |
| 54.0613 | 20.25 | 54.0925 | 27.5  |
| 54.0925 | 15.25 | 54.1238 | 29    |
| 54.13   | 15    | 54.1613 | 28.5  |
| 54.1613 | 14.25 | 54.1913 | 30    |
| 54.1988 | 14    | 54.2263 | 25    |
| 54.2325 | 18.25 | 54.2625 | 25.25 |
| 54.2625 | 17.25 | 54.2925 | 23.75 |
| 54.2925 | 17.75 | 54.3275 | 25.25 |
| 54.325  | 16.75 | 54.3588 | 24.5  |
| 54.3575 | 18.5  | 54.3925 | 27    |
| 54.395  | 17    | 54.425  | 30.25 |
| 54.43   | 13.75 | 54.4613 | 27    |
| 54.4625 | 14.75 | 54.4925 | 25    |
| 54.4938 | 14.25 | 54.5263 | 24.25 |
| 54.5263 | 15.5  | 54.56   | 26.5  |
| 54.5613 | 15    | 54.5925 | 26.5  |
| 54.5925 | 14.5  | 54.6238 | 25.25 |
| 54.6313 | 14.75 | 54.66   | 26.75 |
| 54.6613 | 12    | 54.6913 | 26.5  |
| 54.6988 | 16.75 | 54.7263 | 29.75 |
| 54.7325 | 15.75 | 54.7625 | 26.75 |
| 54.7625 | 17.25 | 54.7925 | 33    |
| 54.7925 | 15    | 54.8275 | 31.25 |
| 54.825  | 14    | 54.8588 | 30.75 |
| 54.8575 | 12.75 | 54.8913 | 26.25 |
| 54.895  | 13.25 | 54.925  | 24.5  |
| 54.93   | 15.75 | 54.9613 | 29    |

|         |       |         |       |
|---------|-------|---------|-------|
| 54.9625 | 19.5  | 54.9925 | 28    |
| 54.9938 | 13    | 55.0263 | 26.5  |
| 55.0288 | 14.5  | 55.06   | 26    |
| 55.0613 | 14.5  | 55.0925 | 28    |
| 55.0925 | 14.5  | 55.1238 | 27    |
| 55.13   | 13.75 | 55.16   | 28.75 |
| 55.1613 | 18    | 55.1913 | 31.25 |
| 55.1988 | 17.25 | 55.2263 | 26.25 |
| 55.2325 | 17.5  | 55.2625 | 27.5  |
| 55.2625 | 14.25 | 55.2925 | 27    |
| 55.2925 | 19.5  | 55.3275 | 29.5  |
| 55.325  | 20.75 | 55.3588 | 30.75 |
| 55.355  | 17.75 | 55.3913 | 34.25 |
| 55.395  | 16.5  | 55.425  | 30.5  |
| 55.4275 | 18.5  | 55.4613 | 27.5  |
| 55.4625 | 17.75 | 55.4925 | 26.5  |
| 55.4938 | 15.75 | 55.5263 | 30.5  |
| 55.5263 | 20.25 | 55.56   | 29.75 |
| 55.5613 | 17    | 55.5925 | 28.75 |
| 55.5925 | 17    | 55.6238 | 28.25 |
| 55.63   | 14.75 | 55.66   | 30.5  |
| 55.6613 | 14.5  | 55.6913 | 26    |
| 55.6988 | 16.25 | 55.7263 | 25.25 |
| 55.7325 | 14.25 | 55.7625 | 28.25 |
| 55.7625 | 16.5  | 55.7925 | 29    |
| 55.7925 | 18.5  | 55.8275 | 28.25 |
| 55.8275 | 15.5  | 55.8588 | 30.75 |
| 55.855  | 17.75 | 55.8913 | 26.25 |
| 55.895  | 16.5  | 55.925  | 30.5  |
| 55.9275 | 18    | 55.9613 | 26.75 |
| 55.9625 | 14.75 | 55.9938 | 23.5  |
| 55.9938 | 15.75 | 56.0263 | 28    |
| 56.0263 | 11.75 | 56.0588 | 31.5  |
| 56.0613 | 9     | 56.0925 | 24    |
| 56.0925 | 10.5  | 56.1238 | 31.25 |
| 56.13   | 10    | 56.16   | 31    |
| 56.1613 | 12.5  | 56.1913 | 31.75 |
| 56.1988 | 13.5  | 56.2263 | 30.25 |
| 56.2325 | 12.75 | 56.2625 | 30    |
| 56.2625 | 6.5   | 56.2925 | 36    |
| 56.2925 | 14.75 | 56.3275 | 29.5  |
| 56.325  | 11.75 | 56.3588 | 30    |
| 56.355  | 15.5  | 56.3938 | 35.25 |
| 56.395  | 16.5  | 56.425  | 31.25 |
| 56.4275 | 17.75 | 56.4625 | 29.75 |
| 56.4625 | 15.5  | 56.4938 | 28.25 |
| 56.4938 | 16.25 | 56.5263 | 32    |
| 56.5263 | 18.25 | 56.56   | 31    |
| 56.5625 | 21    | 56.5925 | 30.5  |
| 56.5925 | 16.75 | 56.6238 | 28.5  |

|         |       |
|---------|-------|
| 56.63   | 12.75 |
| 56.6625 | 20.75 |
| 56.7    | 17.5  |
| 56.735  | 17.75 |
| 56.765  | 18.25 |
| 56.7963 | 14.25 |
| 56.8263 | 15    |
| 56.8575 | 15.25 |
| 56.8975 | 13.25 |
| 56.93   | 14    |
| 56.965  | 15.25 |
| 56.995  | 14    |
| 57.0275 | 16    |
| 57.065  | 15    |
| 57.095  | 15.5  |
| 57.13   | 17    |
| 57.1625 | 15    |
| 57.2    | 16.25 |
| 57.235  | 15.5  |
| 57.265  | 17.5  |
| 57.2963 | 15.25 |
| 57.3263 | 19.75 |
| 57.36   | 15.25 |
| 57.3975 | 16.5  |
| 57.43   | 12    |
| 57.465  | 15.75 |
| 57.495  | 16.25 |
| 57.5275 | 12.25 |
| 57.565  | 12.5  |
| 57.595  | 15    |
| 57.63   | 15.25 |
| 57.6625 | 12.25 |
| 57.6988 | 13.75 |
| 57.735  | 13.75 |
| 57.765  | 14.75 |
| 57.7963 | 13.75 |
| 57.8263 | 16.25 |
| 57.86   | 13.75 |
| 57.8975 | 13    |
| 57.93   | 16.25 |
| 57.965  | 15.25 |
| 57.995  | 13.25 |
| 58.0275 | 15.5  |
| 58.065  | 16.25 |
| 58.095  | 16    |
| 58.13   | 15    |
| 58.1625 | 15    |
| 58.1988 | 15.5  |
| 58.235  | 13.25 |
| 58.265  | 15.25 |

|         |       |
|---------|-------|
| 56.66   | 38.5  |
| 56.6913 | 31    |
| 56.7263 | 29.5  |
| 56.7625 | 25.5  |
| 56.7925 | 26.75 |
| 56.8275 | 30.5  |
| 56.8588 | 29.5  |
| 56.8913 | 28    |
| 56.925  | 28.25 |
| 56.9588 | 33.25 |
| 56.9938 | 29.25 |
| 57.0263 | 32.75 |
| 57.0638 | 28.5  |
| 57.0925 | 30.25 |
| 57.1238 | 29.75 |
| 57.1613 | 22    |
| 57.1913 | 25.5  |
| 57.2263 | 30.25 |
| 57.2625 | 28.5  |
| 57.2925 | 25    |
| 57.3275 | 24.25 |
| 57.3588 | 21.25 |
| 57.3913 | 25.75 |
| 57.425  | 22    |
| 57.4563 | 26.75 |
| 57.4938 | 28    |
| 57.5263 | 25.75 |
| 57.5613 | 21.75 |
| 57.5925 | 21    |
| 57.6238 | 25.25 |
| 57.66   | 24.25 |
| 57.6913 | 23    |
| 57.7288 | 21.25 |
| 57.765  | 18    |
| 57.7925 | 23.75 |
| 57.8275 | 24.5  |
| 57.8588 | 23.5  |
| 57.8913 | 20.75 |
| 57.925  | 29    |
| 57.9563 | 27    |
| 57.9938 | 30.75 |
| 58.0263 | 29.25 |
| 58.0625 | 30.5  |
| 58.0925 | 30.75 |
| 58.1238 | 26.5  |
| 58.16   | 24.75 |
| 58.1913 | 24.5  |
| 58.2288 | 31    |
| 58.2625 | 23.75 |
| 58.2925 | 23.25 |

|         |       |         |       |
|---------|-------|---------|-------|
| 58.2963 | 14.25 | 58.3275 | 24.25 |
| 58.3263 | 14.5  | 58.3613 | 25.5  |
| 58.36   | 16    | 58.3913 | 25.25 |
| 58.395  | 11.5  | 58.425  | 29    |
| 58.43   | 13.5  | 58.4575 | 28.5  |
| 58.465  | 12    | 58.4938 | 28.75 |
| 58.495  | 14.75 | 58.5263 | 29.75 |
| 58.5275 | 15.25 | 58.5613 | 28.25 |
| 58.565  | 16.5  | 58.595  | 28    |
| 58.595  | 16    | 58.6238 | 30.25 |
| 58.63   | 17.5  | 58.66   | 26.75 |
| 58.6625 | 18    | 58.6913 | 26.25 |
| 58.6988 | 17.5  | 58.7288 | 28    |
| 58.735  | 17.5  | 58.7625 | 25.75 |
| 58.765  | 12    | 58.7925 | 22.5  |
| 58.7963 | 18.5  | 58.8275 | 30.25 |
| 58.8263 | 14.25 | 58.8588 | 30.25 |
| 58.86   | 14.75 | 58.8913 | 31.25 |
| 58.895  | 12.25 | 58.925  | 25.5  |
| 58.93   | 11.5  | 58.9613 | 26.25 |
| 58.965  | 11.25 | 58.9938 | 29.75 |
| 58.995  | 16.25 | 59.0263 | 25.75 |
| 59.0275 | 14.5  | 59.0613 | 27    |
| 59.065  | 13.25 | 59.0925 | 24    |
| 59.095  | 14.25 | 59.1238 | 27    |
| 59.13   | 11.75 | 59.1575 | 25.5  |
| 59.1625 | 13    | 59.1913 | 22.75 |
| 59.1988 | 18    | 59.2288 | 21.5  |
| 59.235  | 15.5  | 59.2625 | 20    |
| 59.265  | 13    | 59.2925 | 20.25 |
| 59.2963 | 13.75 | 59.3275 | 23.25 |
| 59.3263 | 14    | 59.3588 | 23    |
| 59.36   | 12.75 | 59.3913 | 21.5  |
| 59.395  | 13.75 | 59.425  | 23.75 |
| 59.43   | 14.75 | 59.46   | 22.75 |
| 59.4625 | 10.75 | 59.4938 | 21.25 |
| 59.495  | 14.5  | 59.5263 | 24.25 |
| 59.5275 | 18    | 59.5625 | 27    |
| 59.565  | 16.75 | 59.595  | 27.5  |
| 59.595  | 15.5  | 59.625  | 26    |
| 59.63   | 17.25 | 59.6588 | 30.25 |
| 59.6625 | 16    | 59.695  | 28.5  |
| 59.6988 | 14.25 | 59.73   | 28    |
| 59.735  | 16.75 | 59.7638 | 28.5  |
| 59.7663 | 12    | 59.7938 | 25.75 |
| 59.7963 | 14.25 | 59.8288 | 32.25 |
| 59.8263 | 8.5   | 59.8613 | 26.75 |
| 59.86   | 13.25 | 59.8938 | 29.75 |
| 59.895  | 11.25 | 59.9275 | 29.75 |
| 59.93   | 11    | 59.9625 | 32.25 |

|         |       |         |       |
|---------|-------|---------|-------|
| 59.9625 | 11    | 59.9988 | 29.75 |
| 59.995  | 10.75 | 60.0288 | 32.25 |
| 60.03   | 12.75 | 60.0638 | 29.5  |
| 60.065  | 12.5  | 60.095  | 28.75 |
| 60.095  | 11    | 60.125  | 31.5  |
| 60.13   | 12.5  | 60.1588 | 36.25 |
| 60.1613 | 12.75 | 60.195  | 39    |
| 60.1988 | 9.5   | 60.23   | 34.75 |
| 60.235  | 11.25 | 60.2638 | 40.75 |
| 60.265  | 10.75 | 60.2938 | 36.75 |
| 60.2988 | 14.25 | 60.3288 | 29.5  |
| 60.3263 | 12    | 60.3613 | 30.5  |
| 60.36   | 10.25 | 60.3938 | 27.25 |
| 60.395  | 11.5  | 60.4275 | 24    |
| 60.4288 | 12    | 60.4625 | 35.25 |
| 60.4625 | 10.5  | 60.4988 | 27.75 |
| 60.495  | 12.5  | 60.5288 | 24.5  |
| 60.53   | 15.75 | 60.5638 | 24.5  |
| 60.565  | 13.5  | 60.595  | 24    |
| 60.595  | 10    | 60.625  | 29    |
| 60.63   | 11.75 | 60.6588 | 29.5  |
| 60.6613 | 14.25 | 60.6975 | 32    |
| 60.6988 | 13.75 | 60.73   | 30.25 |
| 60.735  | 11.75 | 60.7638 | 30.5  |
| 60.765  | 12.25 | 60.795  | 32.25 |
| 60.7963 | 10.75 | 60.8288 | 33    |
| 60.8263 | 15.5  | 60.8625 | 26.5  |
| 60.86   | 13.75 | 60.8938 | 31.75 |
| 60.895  | 11    | 60.9275 | 28    |
| 60.9288 | 14.25 | 60.9625 | 31.25 |
| 60.9625 | 11    | 60.9988 | 32.5  |
| 60.995  | 12.25 | 61.0288 | 28    |
| 61.03   | 10.5  | 61.0638 | 30.5  |
| 61.065  | 10.75 | 61.095  | 26.25 |
| 61.0963 | 12    | 61.125  | 31.75 |
| 61.13   | 13.5  | 61.1588 | 26.75 |
| 61.1613 | 10.75 | 61.1975 | 34.25 |
| 61.1988 | 10.75 | 61.23   | 26.75 |
| 61.2325 | 15    | 61.2638 | 27    |
| 61.265  | 14.25 | 61.295  | 25.75 |
| 61.2963 | 11    | 61.3288 | 32    |
| 61.3263 | 12.5  | 61.3613 | 33    |
| 61.36   | 11.75 | 61.3938 | 32.25 |
| 61.395  | 13.5  | 61.4275 | 25    |
| 61.4275 | 12.75 | 61.4625 | 28    |
| 61.4625 | 10.5  | 61.4988 | 31.25 |
| 61.495  | 10.25 | 61.5288 | 29.25 |
| 61.53   | 12.25 | 61.5638 | 28.5  |
| 61.565  | 11.25 | 61.595  | 34    |
| 61.5963 | 7.25  |         |       |

|         |       |         |       |
|---------|-------|---------|-------|
| 61.63   | 9.5   | 61.6588 | 29.75 |
| 61.6613 | 12.75 |         |       |
| 61.6988 | 11.75 |         |       |
| 61.7325 | 8.25  | 61.7638 | 46.5  |
| 61.765  | 10.5  | 61.795  | 52.25 |
| 61.7963 | 10    |         |       |
| 61.8263 | 12.25 | 61.8613 | 39.75 |
| 61.86   | 8.5   | 61.8938 | 34.75 |
| 61.895  | 12.75 | 61.9275 | 36    |
| 61.9263 | 9.75  | 61.9625 | 26.75 |
| 61.9625 | 11.75 | 61.9988 | 48    |
| 61.995  | 12.5  | 62.0288 | 31    |
| 62.03   | 11.75 | 62.065  | 32.25 |
| 62.065  | 7.75  | 62.095  | 37.5  |
| 62.0963 | 9.75  | 62.125  | 25    |
| 62.13   | 8.5   | 62.1588 | 25.25 |
| 62.1613 | 11.75 | 62.1975 | 29    |
| 62.1988 | 9.5   | 62.2288 | 31    |
| 62.2325 | 10    | 62.265  | 24.75 |
| 62.265  | 13.5  | 62.295  | 35    |
| 62.2963 | 9.75  | 62.3288 | 28.25 |
| 62.3263 | 9.5   | 62.3613 | 34.25 |
| 62.36   | 12.75 | 62.3938 | 27.75 |
| 62.395  | 11.25 | 62.4313 | 41    |
| 62.4263 | 9.25  |         |       |
| 62.4625 | 12.25 | 62.4988 | 43    |
| 62.495  | 9.75  | 62.5288 | 37.5  |
| 62.53   | 13.75 | 62.565  | 43.5  |
| 62.565  | 9.25  | 62.5975 | 29.25 |
| 62.5963 | 13.5  | 62.625  | 35.25 |
| 62.63   | 13    | 62.6588 | 36.25 |
| 62.6613 | 12    | 62.6975 | 38.25 |
| 62.6988 | 11.25 |         |       |
| 62.7325 | 13.75 | 62.7638 | 34.25 |
| 62.765  | 9.5   | 62.795  | 37.75 |
| 62.7963 | 12    | 62.8288 | 48.25 |
| 62.8263 | 10.75 | 62.8613 | 34.75 |
| 62.86   | 10.5  | 62.8938 | 34.5  |
| 62.895  | 12    | 62.9288 | 34    |
| 62.9263 | 11.75 | 62.9625 | 30    |
| 62.9625 | 12    | 62.9988 | 39.25 |
| 62.9938 | 9.5   | 63.0288 | 27.25 |
| 63.03   | 12.25 | 63.065  | 37.25 |
| 63.065  | 12    | 63.095  | 41    |
| 63.0988 | 8.75  | 63.125  | 31    |
| 63.13   | 11.5  | 63.1588 | 31.5  |
| 63.1613 | 11.25 | 63.1975 | 27    |
| 63.1988 | 12.25 | 63.2288 | 30.5  |
| 63.2325 | 8.25  | 63.2638 | 26    |
| 63.265  | 12.75 | 63.295  | 32.75 |

|         |       |         |       |
|---------|-------|---------|-------|
| 63.2963 | 7.5   | 63.3288 | 28.75 |
| 63.3263 | 8.75  | 63.3613 | 27.75 |
| 63.36   | 8.75  | 63.3938 | 25    |
| 63.395  | 7.5   | 63.4288 | 30.5  |
| 63.4263 | 8     | 63.4625 | 23.5  |
| 63.4613 | 7.75  | 63.4988 | 32.5  |
| 63.4938 | 6.5   | 63.5313 | 32.25 |
| 63.53   | 6.75  | 63.565  | 30.25 |
| 63.565  | 8.5   | 63.595  | 30.25 |
| 63.5963 | 9     | 63.625  | 29.75 |
| 63.63   | 7.75  | 63.6613 | 31.25 |
| 63.6613 | 7     | 63.6975 | 29.5  |
| 63.6963 | 11.25 | 63.7288 | 31.75 |
| 63.7325 | 7     | 63.7638 | 25.5  |
| 63.7663 | 10    | 63.795  | 28    |
| 63.7963 | 10    | 63.8288 | 30    |
| 63.8288 | 12    | 63.8613 | 29.75 |
| 63.86   | 13.25 | 63.8938 | 24.75 |
| 63.8925 | 10    | 63.9275 | 22.75 |
| 63.9263 | 13    | 63.9625 | 23.75 |
| 63.9613 | 13.5  | 63.9988 | 25    |
| 63.9938 | 13.75 | 64.0313 | 21.5  |
| 64.03   | 11.25 | 64.065  | 25.5  |
| 64.065  | 15.5  | 64.095  | 22.5  |
| 64.0963 | 13.5  | 64.125  | 23.25 |
| 64.13   | 13.75 | 64.1613 | 20.75 |
| 64.1613 | 10.75 | 64.1975 | 28.75 |
| 64.1963 | 20.5  | 64.23   | 25    |
| 64.2325 | 11.75 | 64.2638 | 32.25 |
| 64.2663 | 14.75 | 64.295  | 29.75 |
| 64.2963 | 12    | 64.3313 | 28.25 |
| 64.3288 | 14.75 | 64.3613 | 29.5  |
| 64.36   | 13.25 | 64.3938 | 29.25 |
| 64.3925 | 12    | 64.4275 | 26    |
| 64.4263 | 12    | 64.4625 | 27.25 |
| 64.4613 | 11.25 | 64.4988 | 28.5  |
| 64.4938 | 12.25 | 64.5313 | 29.25 |
| 64.53   | 11.5  | 64.565  | 26    |
| 64.565  | 12.25 | 64.595  | 27.5  |
| 64.5963 | 14    | 64.625  | 25.5  |
| 64.63   | 14.25 | 64.6613 | 27.25 |
| 64.6613 | 10.75 | 64.6975 | 22.5  |
| 64.6963 | 14.5  | 64.73   | 28.5  |
| 64.7325 | 15.25 | 64.7638 | 22.75 |
| 64.7638 | 11.25 | 64.795  | 29.25 |
| 64.7963 | 12.25 | 64.8288 | 24    |
| 64.8288 | 12    | 64.8613 | 31.25 |
| 64.86   | 14.25 | 64.9    | 31.25 |
| 64.8925 | 8.5   | 64.9275 | 28    |
| 64.9263 | 11.75 | 64.9625 | 26.5  |

|         |       |         |       |
|---------|-------|---------|-------|
| 64.9613 | 11.25 | 64.9988 | 30    |
| 64.9938 | 12.5  | 65.0313 | 32    |
| 65.03   | 13.5  | 65.065  | 30    |
| 65.065  | 12.75 | 65.095  | 25    |
| 65.0963 | 12    | 65.125  | 26.5  |
| 65.13   | 15    | 65.1613 | 28    |
| 65.1613 | 13.25 | 65.1975 | 22.5  |
| 65.1963 | 12    | 65.23   | 24.75 |
| 65.2325 | 12.5  | 65.2638 | 25.5  |
| 65.2638 | 11.25 | 65.295  | 24.25 |
| 65.2963 | 15    | 65.3288 | 23.25 |
| 65.3288 | 16.75 | 65.3613 | 25    |
| 65.36   | 10.25 | 65.3963 | 26.75 |
| 65.3925 | 11.5  | 65.4275 | 26.5  |
| 65.4263 | 12    | 65.4625 | 28.5  |
| 65.4613 | 13.5  | 65.4963 | 23.25 |
| 65.4938 | 13.75 | 65.5325 | 24.5  |
| 65.53   | 11.5  | 65.5675 | 31    |
| 65.5663 | 12.75 | 65.5963 | 26    |
| 65.5963 | 13.75 | 65.6275 | 24    |
| 65.63   | 11.5  | 65.6625 | 26.5  |
| 65.6613 | 12.25 | 65.6988 | 26.25 |
| 65.6963 | 14    | 65.7325 | 26.5  |
| 65.7325 | 12    | 65.7663 | 24.25 |
| 65.7638 | 12.5  | 65.7975 | 27    |
| 65.7963 | 13.25 | 65.8313 | 24.5  |
| 65.8288 | 13.5  | 65.8638 | 22.25 |
| 65.86   | 16.5  | 65.9    | 21.75 |
| 65.8925 | 14.5  | 65.93   | 27.25 |
| 65.9263 | 12.25 | 65.965  | 26.5  |
| 65.96   | 18    | 65.9975 | 21.25 |
| 65.9938 | 12    | 66.0325 | 25.75 |
| 66.03   | 10.25 | 66.0688 | 25.25 |
| 66.0663 | 10.75 | 66.0963 | 26.25 |
| 66.0963 | 12.75 | 66.1288 | 26    |
| 66.13   | 10.75 | 66.1625 | 29.5  |
| 66.1613 | 11    | 66.1988 | 27.25 |
| 66.1963 | 12    | 66.2325 | 27    |
| 66.2325 | 10.5  | 66.2675 | 28.25 |
| 66.2638 | 9     | 66.2975 | 29.25 |
| 66.2963 | 9.25  | 66.3313 | 26.75 |
| 66.3288 | 8.75  | 66.3638 | 20.5  |
| 66.36   | 11    | 66.4    | 27.75 |
| 66.3925 | 11    | 66.43   | 27.75 |
| 66.4263 | 12    | 66.4675 | 24.75 |
| 66.46   | 17.5  | 66.4975 | 20.75 |
| 66.4938 | 11.75 | 66.5325 | 25.5  |
| 66.53   | 12.25 | 66.5663 | 23    |
| 66.5663 | 11.25 | 66.5963 | 23    |
| 66.5963 | 13.25 | 66.6288 | 23    |



|         |       |         |       |
|---------|-------|---------|-------|
| 66.63   | 13.5  | 66.6625 | 25.5  |
| 66.6613 | 10.75 | 66.6988 | 21.25 |
| 66.6963 | 10    | 66.7325 | 23.5  |
| 66.7325 | 12.75 | 66.7675 | 22.5  |
| 66.7638 | 13.75 | 66.8    | 21.75 |
| 66.7963 | 12.5  | 66.8313 | 20.5  |
| 66.8288 | 13.5  | 66.865  | 20.5  |
| 66.86   | 14    | 66.9    | 22.25 |
| 66.8925 | 14.25 | 66.93   | 25.25 |
| 66.9263 | 12.75 | 66.9675 | 23    |
| 66.96   | 12.5  | 66.9975 | 23.5  |
| 66.9938 | 10.25 | 67.0325 | 20.25 |
| 67.0288 | 11.5  | 67.0663 | 23    |
| 67.0663 | 15.75 | 67.0963 | 20.5  |
| 67.0963 | 12.25 | 67.1288 | 18.5  |
| 67.1288 | 13.5  | 67.1625 | 20.25 |
| 67.1613 | 12.25 | 67.1963 | 20    |
| 67.1963 | 11.75 | 67.2325 | 23.5  |
| 67.2325 | 10.5  | 67.2675 | 20.75 |
| 67.2638 | 10.5  | 67.2975 | 19.25 |
| 67.2963 | 10    | 67.3313 | 20.25 |
| 67.3288 | 12.75 | 67.3663 | 20.75 |
| 67.36   | 13    | 67.4    | 20.75 |
| 67.3925 | 10.75 | 67.43   | 20.75 |
| 67.4263 | 14    | 67.4675 | 21.5  |
| 67.46   | 15    | 67.4975 | 19.25 |
| 67.4963 | 12.5  | 67.5325 | 21.25 |
| 67.5288 | 16.5  | 67.5663 | 17.5  |
| 67.5663 | 16    | 67.5963 | 22    |
| 67.5963 | 16.75 | 67.6288 | 21.75 |
| 67.63   | 18.75 | 67.6638 | 21.75 |
| 67.6625 | 15    | 67.6963 | 19.75 |
| 67.6975 | 16    | 67.7325 | 22.5  |
| 67.735  | 17.25 | 67.7675 | 21.5  |
| 67.7663 | 18.75 | 67.7975 | 22.75 |
| 67.7975 | 16.75 | 67.8313 | 26    |
| 67.83   | 13    | 67.8663 | 26    |
| 67.8625 | 13.75 | 67.9    | 26.25 |
| 67.895  | 14    | 67.9313 | 25.5  |
| 67.9288 | 14.75 | 67.9675 | 22    |
| 67.9625 | 13.25 | 67.9975 | 26    |
| 67.9975 | 14.25 | 68.0325 | 23.25 |
| 68.0325 | 12.75 | 68.0663 | 26.75 |
| 68.0688 | 11.75 | 68.0963 | 25.75 |
| 68.0988 | 13.75 | 68.1288 | 23    |
| 68.13   | 11.5  | 68.1625 | 28    |
| 68.1625 | 12.75 | 68.1963 | 27    |
| 68.1975 | 15    | 68.2325 | 25.75 |
| 68.235  | 16    | 68.27   | 21.75 |
| 68.2663 | 14.25 | 68.2975 | 23.25 |

|         |       |
|---------|-------|
| 68.3    | 15    |
| 68.33   | 19.75 |
| 68.3625 | 17.5  |
| 68.395  | 14.5  |
| 68.4288 | 12.25 |
| 68.4625 | 14.25 |
| 68.4975 | 12.5  |
| 68.5325 | 11.5  |
| 68.5688 | 14.25 |
| 68.5988 | 16.5  |
| 68.63   | 13    |
| 68.6625 | 10.5  |
| 68.6975 | 13.75 |
| 68.735  | 12.5  |
| 68.7663 | 10.25 |
| 68.8    | 9.75  |
| 68.83   | 10.25 |
| 68.8625 | 12.75 |
| 68.895  | 10    |
| 68.9288 | 12    |
| 68.9625 | 10.75 |
| 68.9975 | 8.25  |
| 69.0325 | 11.75 |
| 69.0688 | 12    |
| 69.0988 | 10.5  |
| 69.13   | 9.5   |
| 69.1625 | 7.5   |
| 69.1975 | 12.25 |
| 69.235  | 12.25 |
| 69.2663 | 10.25 |
| 69.3    | 12.25 |
| 69.33   | 12.75 |
| 69.365  | 12.75 |
| 69.395  | 11.5  |
| 69.4313 | 11.5  |
| 69.4625 | 12.5  |
| 69.4975 | 11.75 |
| 69.53   | 10.5  |
| 69.5688 | 14    |
| 69.5988 | 12    |
| 69.63   | 14.5  |
| 69.6625 | 11.5  |
| 69.6975 | 12    |
| 69.735  | 12    |
| 69.7663 | 13.25 |
| 69.8    | 11.5  |
| 69.83   | 11    |
| 69.8625 | 15    |
| 69.895  | 10.5  |
| 69.9288 | 12.25 |

|         |       |
|---------|-------|
| 68.3313 | 23.25 |
| 68.3663 | 23    |
| 68.4    | 24.5  |
| 68.4313 | 22.25 |
| 68.4675 | 20.75 |
| 68.4975 | 22.75 |
| 68.5325 | 26.5  |
| 68.5663 | 24.75 |
| 68.5975 | 25.25 |
| 68.6288 | 26.75 |
| 68.6625 | 23.75 |
| 68.6975 | 22.5  |
| 68.7325 | 24.25 |
| 68.7675 | 26.75 |
| 68.8    | 27.25 |
| 68.8313 | 21.75 |
| 68.8663 | 24.75 |
| 68.9    | 26.75 |
| 68.9313 | 26.25 |
| 68.9675 | 21.5  |
| 68.9975 | 25.75 |
| 69.0325 | 21.5  |
| 69.0663 | 21.75 |
| 69.0975 | 21.75 |
| 69.1288 | 20.5  |
| 69.1625 | 20.75 |
| 69.1975 | 24.5  |
| 69.2325 | 23.75 |
| 69.2675 | 26.75 |
| 69.2975 | 19.5  |
| 69.3313 | 23.5  |
| 69.3663 | 23.25 |
| 69.4013 | 23.5  |
| 69.4313 | 18.25 |
| 69.4675 | 21.25 |
| 69.5    | 17.75 |
| 69.5325 | 25.5  |
| 69.5663 | 22.25 |
| 69.5975 | 24.25 |
| 69.6288 | 16.5  |
| 69.6625 | 24    |
| 69.6975 | 23    |
| 69.7325 | 25.25 |
| 69.7663 | 23.5  |
| 69.7975 | 21.75 |
| 69.8338 | 24.75 |
| 69.8663 | 21.5  |
| 69.9    | 23.5  |
| 69.935  | 23.5  |
| 69.965  | 20    |

|         |       |
|---------|-------|
| 69.9625 | 13    |
| 69.9975 | 12.25 |
| 70.0313 | 12    |
| 70.0688 | 13.5  |
| 70.0988 | 11.75 |
| 70.13   | 12.25 |
| 70.1625 | 16    |
| 70.1975 | 11.75 |
| 70.2325 | 14.75 |
| 70.2663 | 17    |
| 70.3    | 19.75 |
| 70.33   | 13    |
| 70.3625 | 16.25 |
| 70.395  | 13.25 |
| 70.4288 | 12.75 |
| 70.4625 | 14.5  |
| 70.4975 | 10.75 |
| 70.5313 | 13.5  |
| 70.5688 | 14.5  |
| 70.5988 | 16    |
| 70.63   | 15.25 |
| 70.6625 | 13.25 |
| 70.6975 | 11.25 |
| 70.7338 | 18    |
| 70.7663 | 12.25 |
| 70.8    | 11    |
| 70.83   | 13.75 |
| 70.8625 | 12    |
| 70.895  | 13.5  |
| 70.9288 | 12.75 |
| 70.9625 | 12.75 |
| 70.9975 | 11.75 |
| 71.0313 | 10.25 |
| 71.0688 | 13    |
| 71.0988 | 11.75 |
| 71.13   | 11.75 |
| 71.1613 | 11.75 |
| 71.1975 | 13.25 |
| 71.2338 | 15    |
| 71.2663 | 9.5   |
| 71.3    | 13.5  |
| 71.33   | 12.25 |
| 71.3625 | 9.5   |
| 71.3925 | 14.75 |
| 71.4288 | 13.25 |
| 71.4625 | 17.25 |
| 71.4975 | 11.5  |
| 71.5313 | 12.5  |
| 71.5688 | 13.75 |
| 71.5988 | 13.75 |

|         |       |
|---------|-------|
| 70      | 21    |
| 70.0325 | 20.5  |
| 70.0663 | 20.5  |
| 70.0975 | 19.25 |
| 70.1288 | 19    |
| 70.1625 | 22    |
| 70.1975 | 22    |
| 70.2325 | 23.25 |
| 70.2663 | 27.25 |
| 70.2975 | 30.25 |
| 70.335  | 22.75 |
| 70.3663 | 27    |
| 70.4    | 23.5  |
| 70.4338 | 23    |
| 70.465  | 26    |
| 70.5    | 29.25 |
| 70.5325 | 25.25 |
| 70.5663 | 28.75 |
| 70.5975 | 23.25 |
| 70.6288 | 22    |
| 70.6625 | 25.5  |
| 70.6975 | 22.75 |
| 70.7325 | 24.25 |
| 70.7663 | 28    |
| 70.7975 | 22    |
| 70.8338 | 26.75 |
| 70.8663 | 23.75 |
| 70.9013 | 22.25 |
| 70.9338 | 20.25 |
| 70.965  | 25    |
| 71      | 24.5  |
| 71.0325 | 21    |
| 71.0675 | 20.75 |
| 71.0975 | 25.75 |
| 71.1288 | 22.25 |
| 71.1625 | 23.25 |
| 71.1975 | 23.5  |
| 71.2325 | 22.5  |
| 71.2663 | 24.25 |
| 71.2975 | 24.75 |
| 71.3338 | 25.75 |
| 71.3663 | 24.75 |
| 71.4    | 24.5  |
| 71.4338 | 22.75 |
| 71.465  | 27.75 |
| 71.5025 | 24.75 |
| 71.5325 | 25.5  |
| 71.5675 | 19.5  |
| 71.5975 | 28.75 |
| 71.6288 | 25.25 |

|         |       |         |       |
|---------|-------|---------|-------|
| 71.63   | 12    | 71.6625 | 24.75 |
| 71.6613 | 12.5  | 71.6975 | 25.75 |
| 71.6975 | 15.25 | 71.7325 | 26    |
| 71.7338 | 14    | 71.7663 | 25.25 |
| 71.7663 | 16.75 | 71.7975 | 25    |
| 71.8    | 15.25 | 71.8338 | 26.75 |
| 71.83   | 12.75 | 71.8663 | 25    |
| 71.8625 | 12.5  | 71.9    | 26.25 |
| 71.8925 | 13.75 | 71.9338 | 27.5  |
| 71.93   | 14.75 | 71.965  | 28    |
| 71.9625 | 13.5  | 72      | 27.75 |
| 71.9975 | 18.75 | 72.0325 | 29.5  |
| 72.0313 | 16    | 72.0675 | 25.25 |
| 72.0688 | 16    | 72.0975 | 26    |
| 72.0988 | 14.75 | 72.1288 | 22.5  |
| 72.13   | 19.25 | 72.1688 | 25    |
| 72.1638 | 18.25 | 72.1975 | 24.75 |
| 72.1975 | 16.5  | 72.2313 | 23    |
| 72.235  | 14.75 | 72.2675 | 34    |
| 72.2663 | 16.75 | 72.3013 | 23.5  |
| 72.3    | 14.5  | 72.335  | 33.25 |
| 72.33   | 15.25 | 72.3675 | 27.75 |
| 72.3625 | 16.75 | 72.405  | 29.75 |
| 72.3925 | 15.25 | 72.435  | 29.25 |
| 72.4288 | 11.75 | 72.4663 | 33    |
| 72.4625 | 15.75 | 72.5025 | 28.25 |
| 72.4975 | 15.75 | 72.535  | 29    |
| 72.5313 | 16.25 | 72.57   | 29.75 |
| 72.5688 | 15    | 72.6    | 30.5  |
| 72.5988 | 16    | 72.6313 | 25    |
| 72.63   | 13.25 | 72.6688 | 25.75 |
| 72.6613 | 14.25 | 72.7    | 25.25 |
| 72.6975 | 14    | 72.7363 | 27.75 |
| 72.7338 | 12.5  | 72.7675 | 28.5  |
| 72.7688 | 10.5  | 72.8013 | 28.75 |
| 72.8    | 15.5  | 72.835  | 27.25 |
| 72.83   | 13    | 72.8675 | 26    |
| 72.8625 | 14.25 | 72.9038 | 34.75 |
| 72.8925 | 16    | 72.935  | 28.25 |
| 72.9288 | 13.25 | 72.9663 | 28.5  |
| 72.9625 | 13.75 | 73.0025 | 33.5  |
| 72.9975 | 14.75 | 73.035  | 33    |
| 73.0313 | 13.25 | 73.07   | 33.75 |
| 73.0688 | 12.75 | 73.1    | 28.5  |
| 73.0988 | 12.75 | 73.1313 | 36.75 |
| 73.13   | 14    | 73.1688 | 29    |
| 73.1638 | 15.5  | 73.2    | 32    |
| 73.1975 | 16    | 73.2363 | 28.25 |
| 73.2338 | 14.75 | 73.2675 | 29.25 |
| 73.2688 | 17.25 | 73.3013 | 31    |

|         |       |         |       |
|---------|-------|---------|-------|
| 73.2988 | 16.25 | 73.335  | 34.25 |
| 73.33   | 14.5  | 73.3675 | 32    |
| 73.3625 | 15.5  | 73.4038 | 28.25 |
| 73.3925 | 14.75 | 73.435  | 28.75 |
| 73.4288 | 14.75 | 73.4663 | 22.5  |
| 73.4625 | 16.5  | 73.5025 | 24.25 |
| 73.4975 | 13.5  | 73.535  | 23.75 |
| 73.5313 | 11.25 | 73.57   | 24.25 |
| 73.5688 | 14    | 73.6    | 26    |
| 73.5988 | 11.25 | 73.6313 | 24    |
| 73.63   | 14    | 73.6688 | 29.5  |
| 73.66   | 14.75 | 73.7    | 26.25 |
| 73.6988 | 13    | 73.7363 | 23.75 |
| 73.7338 | 15.25 | 73.7675 | 23    |
| 73.7688 | 14.25 | 73.8013 | 27.75 |
| 73.7988 | 19    | 73.835  | 26    |
| 73.83   | 13.5  | 73.8675 | 28.75 |
| 73.8625 | 11.25 | 73.9038 | 30.25 |
| 73.8925 | 14.5  | 73.935  | 27.5  |
| 73.9288 | 14.25 | 73.9663 | 28.75 |
| 73.965  | 13    | 74.0025 | 28.25 |
| 73.9975 | 13    | 74.0325 | 30    |
| 74.0313 | 14.5  | 74.07   | 28.75 |
| 74.0688 | 12.25 | 74.1    | 24.5  |
| 74.0988 | 13.5  | 74.1338 | 26.75 |
| 74.13   | 12.5  | 74.1688 | 26.5  |
| 74.16   | 13.25 | 74.2    | 21.5  |
| 74.1975 | 11.5  | 74.2363 | 24.25 |
| 74.2338 | 13.25 | 74.2675 | 24    |
| 74.2688 | 12    | 74.3038 | 26.25 |
| 74.2988 | 12.5  | 74.335  | 21    |
| 74.33   | 13    | 74.3675 | 24.25 |
| 74.3625 | 15.75 | 74.4038 | 21.25 |
| 74.3925 | 10.5  | 74.435  | 20.75 |
| 74.4288 | 10.5  | 74.4663 | 28    |
| 74.465  | 14.75 | 74.5025 | 23.5  |
| 74.4963 | 16    | 74.5375 | 21    |
| 74.5313 | 14    | 74.5725 | 22    |
| 74.5688 | 8.25  | 74.6025 | 21.75 |
| 74.5988 | 13    | 74.6363 | 27.75 |
| 74.63   | 11.75 | 74.67   | 25.25 |
| 74.66   | 13.75 | 74.7013 | 24    |
| 74.6975 | 10.75 | 74.7375 | 28.25 |
| 74.7338 | 10.25 | 74.7713 | 23.25 |
| 74.7688 | 11    | 74.805  | 30.5  |
| 74.7988 | 13    | 74.8363 | 26.25 |
| 74.83   | 15.5  | 74.8688 | 23    |
| 74.8625 | 17.75 | 74.905  | 27.5  |
| 74.8925 | 13.5  | 74.94   | 20.5  |
| 74.9263 | 14.5  | 74.9725 | 23.5  |

|         |       |
|---------|-------|
| 74.965  | 16.25 |
| 74.9963 | 20    |
| 75.0313 | 13.75 |
| 75.0688 | 12.75 |
| 75.0988 | 11.75 |
| 75.13   | 12    |
| 75.16   | 14.75 |
| 75.1975 | 15.75 |
| 75.2338 | 16.25 |
| 75.2688 | 15.5  |
| 75.3013 | 14.5  |
| 75.3325 | 14.75 |
| 75.365  | 11.75 |
| 75.395  | 11.75 |
| 75.4313 | 11.5  |
| 75.4675 | 11.5  |
| 75.5013 | 11    |
| 75.5338 | 13    |
| 75.57   | 8.75  |
| 75.6    | 12.5  |
| 75.6313 | 11.75 |
| 75.6613 | 9     |
| 75.6988 | 9     |
| 75.735  | 10.25 |
| 75.77   | 12.75 |
| 75.8013 | 12    |
| 75.8325 | 11.25 |
| 75.865  | 10.5  |
| 75.895  | 12.25 |
| 75.9288 | 10    |
| 75.9675 | 8     |
| 76.0013 | 12.75 |
| 76.0338 | 11.75 |
| 76.07   | 15.75 |
| 76.1    | 10.75 |
| 76.1313 | 11.25 |
| 76.1613 | 12    |
| 76.1988 | 10.5  |
| 76.235  | 10    |
| 76.27   | 12.25 |
| 76.3013 | 12    |
| 76.3325 | 12.5  |
| 76.365  | 12    |
| 76.395  | 14    |
| 76.4288 | 13    |
| 76.4675 | 10.5  |
| 76.5013 | 12    |
| 76.5338 | 15.25 |
| 76.57   | 12.5  |
| 76.6    | 11.5  |

|         |       |
|---------|-------|
| 75.0025 | 25.25 |
| 75.0375 | 21    |
| 75.0725 | 27    |
| 75.1025 | 23.25 |
| 75.1363 | 30.25 |
| 75.17   | 25.25 |
| 75.2013 | 23.25 |
| 75.2375 | 22    |
| 75.2713 | 21.75 |
| 75.305  | 23.75 |
| 75.3363 | 18.75 |
| 75.3688 | 26.5  |
| 75.405  | 21.75 |
| 75.4375 | 24.5  |
| 75.4688 | 25    |
| 75.5025 | 21.25 |
| 75.5375 | 22    |
| 75.5725 | 19.25 |
| 75.6025 | 23.25 |
| 75.6363 | 29.75 |
| 75.67   | 24.75 |
| 75.7013 | 21.5  |
| 75.7375 | 26.5  |
| 75.7713 | 24.5  |
| 75.805  | 21.5  |
| 75.8363 | 21.75 |
| 75.8688 | 26.25 |
| 75.905  | 26.25 |
| 75.9375 | 24.25 |
| 75.9688 | 20.25 |
| 76.0025 | 26    |
| 76.0375 | 27.25 |
| 76.075  | 28.25 |
| 76.1025 | 24.5  |
| 76.1363 | 24    |
| 76.17   | 23.25 |
| 76.2013 | 22.25 |
| 76.2375 | 26.5  |
| 76.2713 | 24.75 |
| 76.305  | 25.25 |
| 76.3363 | 27.25 |
| 76.3713 | 25    |
| 76.405  | 31.25 |
| 76.4375 | 27    |
| 76.4688 | 25.75 |
| 76.5025 | 35.5  |
| 76.5375 | 26.5  |
| 76.5738 | 27.25 |
| 76.6025 | 21    |
| 76.6363 | 18    |

|         |       |         |       |
|---------|-------|---------|-------|
| 76.6313 | 12.25 | 76.6725 | 23.25 |
| 76.6613 | 9.25  | 76.7013 | 14.5  |
| 76.6988 | 14.75 | 76.7375 | 17.5  |
| 76.735  | 11    | 76.77   | 21.75 |
| 76.77   | 11    | 76.8063 | 21.5  |
| 76.8013 | 13    | 76.8363 | 19.25 |
| 76.8325 | 11.25 | 76.8713 | 25.25 |
| 76.865  | 11.75 | 76.905  | 24.75 |
| 76.895  | 14.25 | 76.9375 | 24.25 |
| 76.9288 | 13.75 | 76.9688 | 27.25 |
| 76.9675 | 12.75 | 77.0025 | 23.75 |
| 77.0013 | 12.75 | 77.0375 | 24.5  |
| 77.0338 | 12.25 | 77.0725 | 23.5  |
| 77.07   | 10.5  | 77.1025 | 24.25 |
| 77.1    | 12.75 | 77.1363 | 22    |
| 77.1313 | 13    | 77.17   | 25    |
| 77.1613 | 9.75  | 77.2013 | 26    |
| 77.1988 | 11.25 | 77.2375 | 25.5  |
| 77.235  | 10.75 | 77.27   | 19    |
| 77.27   | 10.5  | 77.3038 | 22.5  |
| 77.3013 | 8.25  | 77.3363 | 26    |
| 77.3325 | 11.5  | 77.3713 | 27    |
| 77.365  | 12.75 | 77.405  | 30.5  |
| 77.395  | 11.25 | 77.4375 | 25.25 |
| 77.4288 | 7.75  | 77.4688 | 27.5  |
| 77.4688 | 9.5   | 77.5038 | 22.25 |
| 77.5013 | 10.25 | 77.5375 | 27.25 |
| 77.5338 | 11    | 77.5725 | 22.25 |
| 77.5713 | 10    | 77.6025 | 24.5  |
| 77.6    | 8.5   | 77.6388 | 25    |
| 77.6313 | 15    | 77.67   | 25.75 |
| 77.6613 | 12    | 77.7013 | 22.75 |
| 77.7013 | 11.75 | 77.7375 | 29.25 |
| 77.735  | 15    | 77.7713 | 24.5  |
| 77.77   | 13    | 77.8038 | 25.75 |
| 77.8013 | 14    | 77.8363 | 24    |
| 77.8325 | 13    | 77.8713 | 24.5  |
| 77.865  | 15.75 | 77.905  | 22.5  |
| 77.895  | 13.5  | 77.9375 | 23.5  |
| 77.9263 | 10.5  | 77.9688 | 24    |
| 77.9688 | 12.5  | 78.0038 | 23.75 |
| 78.0013 | 11    | 78.0375 | 21.25 |
| 78.0338 | 9     | 78.075  | 20.5  |
| 78.07   | 9     | 78.1025 | 22.75 |
| 78.1    | 11    | 78.1388 | 24.75 |
| 78.1313 | 13.5  | 78.17   | 23.5  |
| 78.1613 | 11    | 78.2013 | 21.25 |
| 78.1988 | 9.25  | 78.2388 | 23.75 |
| 78.235  | 12.75 | 78.27   | 26    |
| 78.27   | 11    | 78.3038 | 27    |

|         |       |
|---------|-------|
| 78.3013 | 10    |
| 78.3325 | 11    |
| 78.365  | 10.25 |
| 78.395  | 15    |
| 78.4263 | 7.75  |
| 78.4688 | 9.5   |
| 78.5013 | 10.25 |
| 78.5338 | 11.75 |
| 78.57   | 8.5   |
| 78.6    | 11    |
| 78.6313 | 12    |
| 78.6613 | 9.25  |
| 78.6988 | 13    |
| 78.735  | 9.5   |
| 78.7688 | 8.75  |
| 78.8013 | 11    |
| 78.8325 | 12    |
| 78.865  | 10.75 |
| 78.895  | 8.25  |
| 78.9275 | 12.75 |
| 78.9688 | 8     |
| 79.0013 | 10.25 |
| 79.0338 | 10.5  |
| 79.07   | 12.25 |
| 79.1    | 12.25 |
| 79.1313 | 12.75 |
| 79.1613 | 10    |
| 79.1988 | 11.5  |
| 79.2363 | 16    |
| 79.2675 | 13.75 |
| 79.3013 | 12    |
| 79.3325 | 13    |
| 79.365  | 13.5  |
| 79.395  | 12.5  |
| 79.4275 | 11.5  |
| 79.4688 | 10.75 |
| 79.5013 | 13.75 |
| 79.5338 | 15    |
| 79.57   | 12.5  |
| 79.6    | 9.25  |
| 79.6313 | 13.75 |
| 79.6613 | 8.5   |
| 79.6988 | 8.5   |
| 79.7363 | 10.25 |
| 79.7675 | 10.75 |
| 79.8013 | 11.25 |
| 79.8325 | 13.25 |
| 79.865  | 13.5  |
| 79.895  | 13.25 |
| 79.9275 | 9.25  |

|         |       |
|---------|-------|
| 78.3363 | 29.25 |
| 78.3713 | 26    |
| 78.405  | 25.75 |
| 78.4375 | 28.5  |
| 78.4688 | 25.75 |
| 78.5038 | 32.75 |
| 78.5375 | 28.75 |
| 78.5725 | 26.75 |
| 78.6038 | 23.5  |
| 78.6388 | 27.5  |
| 78.67   | 27.25 |
| 78.7013 | 27    |
| 78.7375 | 29.5  |
| 78.77   | 22    |
| 78.8038 | 26    |
| 78.8363 | 25.75 |
| 78.8713 | 27    |
| 78.9075 | 23.25 |
| 78.9375 | 26.5  |
| 78.9688 | 24.25 |
| 79.0038 | 23.25 |
| 79.0375 | 24.5  |
| 79.0725 | 23    |
| 79.1038 | 24.75 |
| 79.1388 | 23.25 |
| 79.17   | 22    |
| 79.2013 | 26.25 |
| 79.2375 | 25.25 |
| 79.27   | 24.75 |
| 79.3038 | 27.25 |
| 79.3363 | 31.5  |
| 79.3713 | 27.75 |
| 79.4075 | 26.25 |
| 79.4375 | 25.5  |
| 79.4688 | 24.75 |
| 79.5038 | 21.25 |
| 79.5375 | 26.75 |
| 79.5725 | 21.25 |
| 79.6038 | 22.25 |
| 79.6388 | 26    |
| 79.67   | 21    |
| 79.7013 | 22    |
| 79.7375 | 23.25 |
| 79.77   | 20.75 |
| 79.8038 | 17.75 |
| 79.8363 | 19.75 |
| 79.8725 | 25.75 |
| 79.9075 | 24.25 |
| 79.9375 | 25.5  |
| 79.9688 | 22.5  |



|         |       |         |       |
|---------|-------|---------|-------|
| 79.9713 | 14.25 | 80.0063 | 21.75 |
| 80.0038 | 15.75 | 80.0363 | 23.5  |
| 80.0363 | 13    | 80.0738 | 23.25 |
| 80.0725 | 10    | 80.1063 | 24.75 |
| 80.1025 | 13.25 | 80.14   | 23.5  |
| 80.1325 | 14    | 80.1713 | 22    |
| 80.1625 | 11.75 | 80.2025 | 24.25 |
| 80.2    | 11.25 | 80.24   | 26.5  |
| 80.2388 | 13.5  | 80.2725 | 28.5  |
| 80.2688 | 13.25 | 80.3063 | 24    |
| 80.3025 | 11.5  | 80.34   | 23.5  |
| 80.3338 | 12.75 | 80.375  | 22    |
| 80.3675 | 11.75 | 80.41   | 24.25 |
| 80.3975 | 10.25 | 80.44   | 25.75 |
| 80.4313 | 12.25 | 80.4738 | 28.75 |
| 80.4713 | 9     | 80.5075 | 24    |
| 80.5038 | 12.25 | 80.54   | 27.25 |
| 80.5363 | 13    | 80.5763 | 20.75 |
| 80.5725 | 16    | 80.6088 | 23    |
| 80.6025 | 12.75 | 80.6425 | 23.25 |
| 80.6325 | 13.25 | 80.6738 | 24.25 |
| 80.6625 | 11.75 | 80.705  | 22.75 |
| 80.7    | 14.5  | 80.7413 | 21.25 |
| 80.7388 | 13.5  | 80.7738 | 23.5  |
| 80.7688 | 12.25 | 80.8088 | 27.25 |
| 80.8025 | 13    | 80.8413 | 23.5  |
| 80.8338 | 11    | 80.8763 | 23.75 |
| 80.8675 | 11.5  | 80.9113 | 26    |
| 80.8975 | 13    | 80.9413 | 27    |
| 80.9313 | 11.25 | 80.975  | 21.75 |
| 80.9713 | 11.25 | 81.0075 | 25.25 |
| 81.0038 | 9.25  | 81.04   | 21.25 |
| 81.0363 | 11.5  | 81.0788 | 22    |
| 81.0725 | 13.5  | 81.1088 | 29.5  |
| 81.1025 | 16.5  | 81.1425 | 21    |
| 81.1325 | 11.5  | 81.1738 | 22.5  |
| 81.165  | 9.75  | 81.205  | 24    |
| 81.2    | 12.75 | 81.2413 | 22    |
| 81.2388 | 10.5  | 81.2738 | 25.75 |
| 81.2688 | 9.75  | 81.3088 | 22    |
| 81.3025 | 10.25 | 81.3413 | 27    |
| 81.3338 | 8     | 81.3763 | 24.25 |
| 81.3675 | 11    | 81.4113 | 27.25 |
| 81.3975 | 11.5  | 81.4413 | 21.5  |
| 81.4313 | 12.75 | 81.4738 | 29.5  |
| 81.4713 | 13.25 | 81.5075 | 29    |
| 81.5038 | 13.75 | 81.54   | 25.75 |
| 81.5363 | 13.75 | 81.5763 | 24.25 |
| 81.5725 | 13    | 81.6113 | 27.5  |
| 81.6025 | 13    | 81.6425 | 26.25 |

|         |       |         |       |
|---------|-------|---------|-------|
| 81.6325 | 12.25 | 81.6738 | 24.25 |
| 81.665  | 11.75 | 81.705  | 25.75 |
| 81.7025 | 12    | 81.7413 | 26.25 |
| 81.7388 | 10.75 | 81.7763 | 26.5  |
| 81.7688 | 10.75 | 81.8088 | 23.75 |
| 81.8025 | 10.5  | 81.8413 | 26.75 |
| 81.8338 | 11.75 | 81.8763 | 25    |
| 81.8675 | 11    | 81.9113 | 24    |
| 81.8975 | 14.25 | 81.9413 | 33    |
| 81.9313 | 12    | 81.9738 | 29.75 |
| 81.9713 | 11.75 | 82.0075 | 27.75 |
| 82.0038 | 12.75 | 82.04   | 30.75 |
| 82.0375 | 9.75  | 82.0763 | 28.5  |
| 82.0725 | 11.25 | 82.1113 | 30    |
| 82.1025 | 13.75 | 82.1425 | 29.25 |
| 82.1325 | 13    | 82.1738 | 25.75 |
| 82.165  | 10.75 | 82.205  | 30.75 |
| 82.2025 | 8.75  | 82.2413 | 25    |
| 82.2363 | 11.75 | 82.2738 | 26    |
| 82.2688 | 11.25 | 82.3088 | 27.5  |
| 82.3025 | 10.5  | 82.3413 | 27.5  |
| 82.3338 | 11    | 82.3763 | 25    |
| 82.3675 | 10.5  | 82.4113 | 22.75 |
| 82.3975 | 9.75  | 82.4413 | 28.25 |
| 82.4313 | 14.5  | 82.4738 | 25.5  |
| 82.4713 | 12    | 82.5075 | 32.5  |
| 82.5038 | 12.5  | 82.5388 | 26.75 |
| 82.535  | 10    | 82.5763 | 22    |
| 82.5725 | 13.25 | 82.6113 | 25.75 |
| 82.6025 | 11    | 82.6425 | 25.5  |
| 82.6325 | 10.75 | 82.6763 | 23.25 |
| 82.665  | 16    | 82.705  | 25.5  |
| 82.7013 | 13    | 82.7413 | 24.5  |
| 82.7363 | 14    | 82.7738 | 17    |
| 82.7688 | 13.5  | 82.8088 | 19.5  |
| 82.8025 | 12.75 | 82.8413 | 22.5  |
| 82.8338 | 8.5   | 82.8763 | 23.75 |
| 82.8675 | 10.5  | 82.9113 | 21.25 |
| 82.8975 | 14.5  | 82.9413 | 26.5  |
| 82.9313 | 18.5  | 82.9738 | 27    |
| 82.9713 | 12    | 83.0075 | 26.5  |
| 83.0038 | 11.25 | 83.0388 | 23.75 |
| 83.035  | 12    | 83.0763 | 28.25 |
| 83.0725 | 11.75 | 83.1113 | 26.5  |
| 83.1025 | 13.25 | 83.1425 | 30.75 |
| 83.1325 | 11.5  | 83.1738 | 25.75 |
| 83.1675 | 7.75  | 83.205  | 27.5  |
| 83.2013 | 10    | 83.2438 | 23    |
| 83.2363 | 9.75  | 83.275  | 26.5  |
| 83.2688 | 5.25  | 83.3088 | 30    |

|         |       |
|---------|-------|
| 83.3038 | 12    |
| 83.3338 | 12.25 |
| 83.3675 | 9.75  |
| 83.3975 | 11.25 |
| 83.4313 | 10.5  |
| 83.4713 | 8     |
| 83.5038 | 11.75 |
| 83.535  | 10.75 |
| 83.5725 | 9     |
| 83.6025 | 9     |
| 83.6325 | 11.25 |
| 83.6675 | 8.5   |
| 83.7013 | 7.75  |
| 83.7363 | 9     |
| 83.7688 | 6.75  |
| 83.8038 | 8     |
| 83.8363 | 6.75  |
| 83.8675 | 9     |
| 83.9    | 8.5   |
| 83.9313 | 9.5   |
| 83.9713 | 10    |
| 84.0025 | 8.75  |
| 84.035  | 10.25 |
| 84.0725 | 11.25 |
| 84.1025 | 9.75  |
| 84.1325 | 10.25 |
| 84.1675 | 12.25 |
| 84.2013 | 14    |
| 84.2363 | 11    |
| 84.2688 | 12    |
| 84.3038 | 8.5   |
| 84.3338 | 11.5  |
| 84.3675 | 13.25 |
| 84.4    | 6.5   |
| 84.4313 | 8.75  |
| 84.4713 | 12    |
| 84.5025 | 12.25 |
| 84.535  | 9.25  |
| 84.5725 | 15.5  |
| 84.6025 | 11.75 |
| 84.6325 | 14.25 |
| 84.6675 | 14    |
| 84.7013 | 15    |
| 84.7363 | 11.5  |
| 84.7688 | 13.25 |
| 84.8038 | 10.75 |
| 84.8338 | 10.75 |
| 84.8675 | 12.75 |
| 84.9    | 10.5  |
| 84.9338 | 7.5   |

|         |       |
|---------|-------|
| 83.3413 | 26    |
| 83.3763 | 21.25 |
| 83.4113 | 29    |
| 83.4413 | 28.5  |
| 83.4738 | 32.25 |
| 83.5075 | 24.75 |
| 83.5388 | 23    |
| 83.5763 | 29.75 |
| 83.6113 | 25.5  |
| 83.6425 | 25    |
| 83.6738 | 30.5  |
| 83.705  | 25.5  |
| 83.7413 | 25    |
| 83.7738 | 29.5  |
| 83.8088 | 26.5  |
| 83.8438 | 25    |
| 83.8763 | 26    |
| 83.9113 | 26.25 |
| 83.9413 | 27.75 |
| 83.9738 | 27    |
| 84.0075 | 28    |
| 84.0388 | 28    |
| 84.0763 | 25    |
| 84.1113 | 26    |
| 84.1425 | 30.5  |
| 84.1738 | 26.25 |
| 84.205  | 25.25 |
| 84.2413 | 26.25 |
| 84.2738 | 29    |
| 84.31   | 26.5  |
| 84.3438 | 27.5  |
| 84.3763 | 33    |
| 84.4113 | 28.25 |
| 84.4413 | 30.5  |
| 84.4738 | 26.75 |
| 84.5075 | 27.75 |
| 84.5388 | 23.5  |
| 84.5763 | 24.75 |
| 84.6113 | 26.25 |
| 84.6425 | 26.25 |
| 84.6738 | 21.75 |
| 84.705  | 26.25 |
| 84.7413 | 20.5  |
| 84.7738 | 18.75 |
| 84.81   | 26    |
| 84.8438 | 25.75 |
| 84.8763 | 26.5  |
| 84.9113 | 25.25 |
| 84.9413 | 21.5  |
| 84.9738 | 20.5  |

|         |       |         |       |
|---------|-------|---------|-------|
| 84.9713 | 12.25 | 85.0075 | 25.25 |
| 85.0025 | 11    | 85.0388 | 24.5  |
| 85.035  | 13.5  | 85.0763 | 23.75 |
| 85.0725 | 10.5  | 85.1138 | 26.75 |
| 85.1025 | 11.75 | 85.145  | 23.25 |
| 85.1325 | 12    | 85.1763 | 26.5  |
| 85.1675 | 9.25  | 85.2063 | 20.25 |
| 85.2013 | 10.75 | 85.2438 | 20.75 |
| 85.2363 | 13.5  | 85.275  | 26.25 |
| 85.2688 | 13.25 | 85.3088 | 21.75 |
| 85.3038 | 14.5  | 85.345  | 24.25 |
| 85.3338 | 13    | 85.3775 | 24    |
| 85.3675 | 13    | 85.4125 | 21.75 |
| 85.4    | 14.5  | 85.4438 | 22.5  |
| 85.4338 | 17    | 85.4763 | 26.25 |
| 85.4713 | 11.75 | 85.51   | 22    |
| 85.5025 | 12    | 85.5438 | 26.75 |
| 85.535  | 14.25 | 85.58   | 23.5  |
| 85.5725 | 12    | 85.6138 | 20    |
| 85.6025 | 10.5  | 85.645  | 21.75 |
| 85.6325 | 13    | 85.6763 | 22.25 |
| 85.6675 | 12    | 85.7063 | 23    |
| 85.7013 | 10.25 | 85.7425 | 28    |
| 85.7363 | 8.5   | 85.775  | 25    |
| 85.7688 | 11.5  | 85.8088 | 18.75 |
| 85.8038 | 12.75 | 85.845  | 23.75 |
| 85.8338 | 13.75 | 85.8775 | 25.25 |
| 85.8675 | 10.75 | 85.9125 | 21    |
| 85.9013 | 11.25 | 85.9438 | 26.5  |
| 85.9338 | 10.5  | 85.9763 | 27.5  |
| 85.9713 | 10.5  | 86.01   | 24.25 |
| 86.0025 | 15    | 86.045  | 23.25 |
| 86.035  | 14    | 86.0813 | 28    |
| 86.0725 | 11.75 | 86.1138 | 20    |
| 86.1025 | 9.75  | 86.145  | 22.75 |
| 86.1325 | 11    | 86.1763 | 23.5  |
| 86.1675 | 13    | 86.2063 | 23    |
| 86.2013 | 14.25 | 86.2425 | 22    |
| 86.2363 | 14    | 86.275  | 18.75 |
| 86.2663 | 11.5  | 86.3088 | 24    |
| 86.3013 | 13    | 86.345  | 23.25 |
| 86.3338 | 14.75 | 86.3775 | 25.75 |
| 86.3675 | 13.5  | 86.4125 | 24.75 |
| 86.4013 | 12.25 | 86.4438 | 22.75 |
| 86.4338 | 12    | 86.4763 | 22.25 |
| 86.4725 | 14.25 | 86.51   | 22.75 |
| 86.5025 | 12.25 | 86.5438 | 25.25 |
| 86.535  | 11.5  | 86.58   | 23    |
| 86.5725 | 14.75 | 86.6138 | 25.75 |
| 86.6025 | 11.75 | 86.645  | 23.75 |

|         |       |         |       |
|---------|-------|---------|-------|
| 86.6325 | 11    | 86.6788 | 24.75 |
| 86.6675 | 12.75 | 86.7063 | 25.25 |
| 86.7013 | 13.5  | 86.7425 | 22.5  |
| 86.7363 | 12.25 | 86.775  | 28.5  |
| 86.7663 | 11.25 | 86.8088 | 22    |
| 86.8013 | 15.25 | 86.845  | 25.5  |
| 86.8338 | 15.25 | 86.8775 | 22.25 |
| 86.8675 | 8.5   | 86.9125 | 27.5  |
| 86.9013 | 14.5  | 86.9438 | 25    |
| 86.9338 | 13.5  | 86.9763 | 24.25 |
| 86.9713 | 16.25 | 87.0075 | 28    |
| 87.0025 | 11.25 | 87.0438 | 28.25 |
| 87.035  | 12.75 | 87.08   | 27.25 |
| 87.0725 | 18.5  | 87.1138 | 27    |
| 87.1025 | 18    | 87.145  | 25.5  |
| 87.1325 | 17.5  | 87.1763 | 28    |
| 87.1675 | 14.25 | 87.2063 | 26.25 |
| 87.2013 | 13.75 | 87.2425 | 26.75 |
| 87.2363 | 15.75 | 87.275  | 21.25 |
| 87.2663 | 17.25 | 87.3113 | 26.25 |
| 87.3013 | 16.5  | 87.345  | 22    |
| 87.3338 | 16.25 | 87.3775 | 24.75 |
| 87.3675 | 11.25 | 87.4125 | 27    |
| 87.4013 | 14.5  | 87.4438 | 23.5  |
| 87.4338 | 13.5  | 87.4763 | 24    |
| 87.4713 | 13    | 87.5075 | 23    |
| 87.5025 | 14.25 | 87.5463 | 26.25 |
| 87.535  | 13    | 87.58   | 23    |
| 87.5725 | 17.25 | 87.6138 | 24.5  |
| 87.6025 | 14.25 | 87.645  | 23    |
| 87.6325 | 13.25 | 87.6763 | 22.75 |
| 87.6675 | 12.75 | 87.7063 | 25    |
| 87.7013 | 15.25 | 87.745  | 21.5  |
| 87.7363 | 15.75 | 87.775  | 21.5  |
| 87.7663 | 14.75 | 87.8113 | 25.75 |
| 87.8013 | 15.75 | 87.845  | 24.75 |
| 87.8338 | 18    | 87.8775 | 18.75 |
| 87.8675 | 17.75 | 87.9125 | 23.75 |
| 87.9013 | 13.5  | 87.9438 | 34    |
| 87.9338 | 11.5  | 87.9763 | 26    |
| 87.9713 | 13.5  | 88.0075 | 29.5  |
| 88.0025 | 17.25 | 88.0463 | 22.25 |
| 88.0375 | 11    | 88.08   | 25.75 |
| 88.0725 | 17.75 | 88.1138 | 27.25 |
| 88.1025 | 13.75 | 88.145  | 28.5  |
| 88.1325 | 14    | 88.1763 | 27.25 |
| 88.1675 | 20.25 | 88.2063 | 26.5  |
| 88.2013 | 18.5  | 88.2425 | 26.75 |
| 88.2363 | 14    | 88.275  | 23    |
| 88.2663 | 15    | 88.3113 | 29.5  |

|         |       |         |       |
|---------|-------|---------|-------|
| 88.3013 | 15.25 | 88.345  | 23.75 |
| 88.3338 | 14.5  | 88.3775 | 27.75 |
| 88.3675 | 15    | 88.4125 | 24.75 |
| 88.4013 | 13.5  | 88.4438 | 28    |
| 88.4338 | 14.5  | 88.4763 | 28.25 |
| 88.4713 | 13    | 88.5075 | 24    |
| 88.5025 | 14.25 | 88.5438 | 28.25 |
| 88.5375 | 14.25 | 88.5775 | 23.25 |
| 88.5725 | 16    | 88.615  | 28.75 |
| 88.6025 | 15.75 | 88.645  | 22.25 |
| 88.6325 | 18    | 88.6763 | 25.25 |
| 88.6675 | 13.25 | 88.7063 | 25    |
| 88.7025 | 15.25 | 88.7425 | 22.5  |
| 88.7363 | 16.5  | 88.775  | 25.25 |
| 88.7663 | 12.75 | 88.8113 | 23.25 |
| 88.8013 | 16    | 88.845  | 24.75 |
| 88.8338 | 14.75 | 88.8775 | 25.75 |
| 88.8675 | 10    | 88.9125 | 26    |
| 88.9013 | 15.75 | 88.9438 | 23.75 |
| 88.9338 | 18.25 | 88.9763 | 21.75 |
| 88.9713 | 16.25 | 89.0075 | 24.75 |
| 89.0025 | 14.5  | 89.0463 | 25.75 |
| 89.0363 | 12.25 | 89.0775 | 26.5  |
| 89.0725 | 13    | 89.1138 | 25.25 |
| 89.1025 | 17.25 | 89.145  | 21    |
| 89.1325 | 14.75 | 89.1763 | 22.5  |
| 89.1675 | 14    | 89.2063 | 22.75 |
| 89.2013 | 15.75 | 89.2425 | 21.25 |
| 89.2363 | 13.25 | 89.275  | 21.25 |
| 89.2663 | 16.75 | 89.3113 | 21.5  |
| 89.3013 | 14.25 | 89.345  | 26.75 |
| 89.3338 | 14.25 | 89.3775 | 21    |
| 89.3675 | 12    | 89.41   | 22.5  |
| 89.4013 | 11    | 89.4438 | 24.25 |
| 89.4338 | 18    | 89.4763 | 15.25 |
| 89.4713 | 13.5  | 89.5075 | 14    |
| 89.5025 | 17.25 | 89.545  | 24.75 |
| 89.5363 | 13.75 | 89.58   | 19    |
| 89.5725 | 15.25 | 89.6138 | 22.5  |
| 89.6025 | 13.75 | 89.645  | 19.5  |
| 89.635  | 17.5  | 89.6763 | 23.75 |
| 89.6688 | 12    | 89.7063 | 23.25 |
| 89.7013 | 10    | 89.7425 | 20.25 |
| 89.7363 | 13.5  | 89.775  | 18.75 |
| 89.7663 | 14.75 | 89.8113 | 24    |
| 89.8013 | 13.25 | 89.845  | 25.5  |
| 89.8338 | 15.5  | 89.8775 | 20.5  |
| 89.8675 | 14.25 | 89.91   | 25.75 |
| 89.9013 | 13.25 | 89.9438 | 26.25 |
| 89.9338 | 15    | 89.9763 | 23.25 |

|         |       |         |       |
|---------|-------|---------|-------|
| 89.9713 | 12.75 | 90.0075 | 24.5  |
| 90.0025 | 15.75 | 90.045  | 26.25 |
| 90.0363 | 17    | 90.0775 | 22.75 |
| 90.0725 | 14.5  | 90.1138 | 28.5  |
| 90.1025 | 17    | 90.145  | 24.5  |
| 90.135  | 10.75 | 90.1763 | 24.25 |
| 90.1688 | 14.5  | 90.2063 | 25.25 |
| 90.2025 | 15.75 | 90.2425 | 26.5  |
| 90.2363 | 14.25 | 90.2763 | 27    |
| 90.2663 | 13.5  | 90.3113 | 24.25 |
| 90.3013 | 15.25 | 90.345  | 26.25 |
| 90.3338 | 14.5  | 90.3775 | 24.5  |
| 90.3675 | 13.25 | 90.41   | 25.25 |
| 90.4013 | 15    | 90.4438 | 24.5  |
| 90.4338 | 18.75 | 90.4763 | 25    |
| 90.4713 | 16.5  | 90.5075 | 26    |
| 90.5025 | 14    | 90.545  | 26.5  |
| 90.5363 | 15.5  | 90.5775 | 20.75 |
| 90.5725 | 14.25 | 90.6138 | 21    |
| 90.6025 | 18.25 | 90.645  | 24.5  |
| 90.635  | 20.5  | 90.6763 | 21.5  |
| 90.6688 | 19    | 90.7063 | 20.5  |
| 90.7025 | 18.25 | 90.7425 | 19.75 |
| 90.7363 | 16    | 90.7763 | 25.5  |
| 90.7663 | 17.75 | 90.8113 | 28    |
| 90.8013 | 16.25 | 90.845  | 21.75 |
| 90.8338 | 17.75 | 90.8775 | 25.75 |
| 90.8675 | 14.25 | 90.91   | 27    |
| 90.9013 | 14.25 | 90.9438 | 26.5  |
| 90.9375 | 17.25 | 90.9763 | 25.75 |
| 90.9725 | 18    | 91.0075 | 23.25 |
| 91.0038 | 16.75 | 91.045  | 19    |
| 91.0388 | 17.75 | 91.0775 | 20.25 |
| 91.075  | 14    | 91.1138 | 20.75 |
| 91.105  | 15    | 91.145  | 23.25 |
| 91.1375 | 17.25 | 91.1763 | 23    |
| 91.1713 | 14.75 | 91.2063 | 24    |
| 91.205  | 16.5  | 91.2425 | 25.75 |
| 91.2388 | 15.25 | 91.2775 | 23.25 |
| 91.2688 | 12.25 | 91.3113 | 23    |
| 91.3025 | 19.75 | 91.345  | 17.5  |
| 91.335  | 14.5  | 91.3775 | 19.25 |
| 91.3688 | 13.75 | 91.41   | 25.75 |
| 91.4025 | 14    | 91.4438 | 22.5  |
| 91.4375 | 14.75 | 91.4763 | 23    |
| 91.4725 | 12.75 | 91.5075 | 19.75 |
| 91.5038 | 12.75 | 91.545  | 21.75 |
| 91.5388 | 11    | 91.5788 | 20    |
| 91.5725 | 11.5  | 91.6138 | 19.25 |
| 91.605  | 12.75 | 91.645  | 24    |

|         |       |
|---------|-------|
| 91.64   | 13    |
| 91.6713 | 12.75 |
| 91.705  | 16.25 |
| 91.7388 | 10.75 |
| 91.7688 | 14.25 |
| 91.8025 | 13.75 |
| 91.835  | 14.25 |
| 91.8688 | 13.5  |
| 91.9025 | 19.25 |
| 91.9375 | 15    |
| 91.9713 | 18.5  |
| 92.0038 | 18.5  |
| 92.0388 | 12.5  |
| 92.0725 | 13.75 |
| 92.105  | 13.25 |
| 92.1375 | 12.75 |
| 92.1725 | 10.25 |
| 92.205  | 14    |
| 92.2388 | 9     |
| 92.2688 | 17.5  |
| 92.3    | 13.75 |
| 92.335  | 16.25 |
| 92.3688 | 13.5  |
| 92.4025 | 14.25 |
| 92.4375 | 15.5  |
| 92.4713 | 11    |
| 92.5038 | 9.75  |
| 92.5388 | 11.5  |
| 92.5725 | 13.75 |
| 92.605  | 12.25 |
| 92.6375 | 13.75 |
| 92.6713 | 12.75 |
| 92.705  | 16.25 |
| 92.7388 | 13    |
| 92.7688 | 12.25 |
| 92.8    | 11    |
| 92.835  | 10    |
| 92.8688 | 10.5  |
| 92.9025 | 13    |
| 92.9375 | 11.25 |
| 92.9713 | 15.75 |
| 93.0038 | 13.25 |
| 93.0388 | 19.5  |
| 93.0725 | 20    |
| 93.105  | 11.5  |
| 93.1375 | 14.25 |
| 93.1713 | 13.5  |
| 93.205  | 18    |
| 93.2388 | 15.25 |
| 93.2688 | 16    |

|         |       |
|---------|-------|
| 91.6763 | 19    |
| 91.7063 | 20.25 |
| 91.7425 | 21    |
| 91.7775 | 18    |
| 91.8113 | 22.75 |
| 91.845  | 21.25 |
| 91.8775 | 27    |
| 91.91   | 23.5  |
| 91.9438 | 23.5  |
| 91.9763 | 23.25 |
| 92.0088 | 25.5  |
| 92.045  | 23.25 |
| 92.0775 | 22    |
| 92.1138 | 28.75 |
| 92.145  | 22    |
| 92.1763 | 24.75 |
| 92.2063 | 24.5  |
| 92.2425 | 25.25 |
| 92.2775 | 26    |
| 92.3113 | 24.25 |
| 92.345  | 27.75 |
| 92.3788 | 22    |
| 92.41   | 26.25 |
| 92.4438 | 26    |
| 92.4763 | 24.25 |
| 92.5088 | 23.75 |
| 92.545  | 26.75 |
| 92.5775 | 24.75 |
| 92.6138 | 20    |
| 92.645  | 25.75 |
| 92.6763 | 16    |
| 92.7063 | 25.25 |
| 92.7425 | 23.25 |
| 92.7775 | 21.5  |
| 92.8113 | 23.75 |
| 92.845  | 23.25 |
| 92.8775 | 27.5  |
| 92.91   | 27.25 |
| 92.9438 | 27.75 |
| 92.9775 | 23    |
| 93.0088 | 23    |
| 93.045  | 26.25 |
| 93.08   | 23.75 |
| 93.1138 | 21.25 |
| 93.1463 | 28.25 |
| 93.1763 | 21.5  |
| 93.2063 | 23.75 |
| 93.2425 | 26    |
| 93.2775 | 25.75 |
| 93.31   | 25.25 |



|         |       |         |       |
|---------|-------|---------|-------|
| 93.3    | 15.5  | 93.3438 | 23.25 |
| 93.335  | 10.5  | 93.38   | 24.25 |
| 93.3688 | 13.25 | 93.41   | 24.25 |
| 93.4025 | 13.25 | 93.4438 | 22.25 |
| 93.4375 | 14.5  | 93.4775 | 23.5  |
| 93.4713 | 13.25 | 93.5088 | 21.25 |
| 93.5038 | 12.75 | 93.545  | 24.75 |
| 93.5388 | 12.25 | 93.5775 | 23    |
| 93.5725 | 15.75 | 93.6138 | 23    |
| 93.605  | 11.5  | 93.645  | 24.75 |
| 93.6375 | 12.25 | 93.6763 | 21.25 |
| 93.6713 | 15    | 93.7063 | 20.5  |
| 93.705  | 13.75 | 93.745  | 16.75 |
| 93.7388 | 15.75 | 93.7775 | 18.75 |
| 93.7688 | 10.75 | 93.81   | 21.25 |
| 93.8    | 13.75 | 93.8438 | 22.5  |
| 93.835  | 15    | 93.8775 | 19    |
| 93.8688 | 17    | 93.91   | 23    |
| 93.9025 | 14.5  | 93.9438 | 21.25 |
| 93.9375 | 15.5  | 93.9775 | 21.25 |
| 93.9725 | 19.25 | 94.0088 | 18.75 |
| 94.0038 | 14    | 94.0425 | 22.75 |
| 94.04   | 12    | 94.0775 | 24.25 |
| 94.0725 | 15.5  | 94.1138 | 22.5  |
| 94.105  | 15    | 94.145  | 22    |
| 94.1375 | 11.75 | 94.1763 | 19.75 |
| 94.1713 | 18.75 | 94.2063 | 21.5  |
| 94.205  | 17    | 94.2463 | 22.25 |
| 94.2388 | 19.75 | 94.2788 | 27.5  |
| 94.2688 | 21.25 | 94.3113 | 26.25 |
| 94.3025 | 14    | 94.3463 | 24    |
| 94.335  | 14.5  | 94.3788 | 27.25 |
| 94.3688 | 15.75 | 94.4113 | 25.75 |
| 94.4025 | 16.5  | 94.445  | 25    |
| 94.4375 | 15    | 94.4813 | 18.25 |
| 94.4713 | 19.75 | 94.5113 | 25    |
| 94.5038 | 12.75 | 94.545  | 23.25 |
| 94.5388 | 10.75 | 94.5813 | 25    |
| 94.5725 | 15.5  | 94.6163 | 25.25 |
| 94.605  | 14.75 | 94.6475 | 25.5  |
| 94.6375 | 15.75 | 94.6788 | 27    |
| 94.67   | 12.25 | 94.7088 | 26.75 |
| 94.705  | 13    | 94.7463 | 26.75 |
| 94.7388 | 17    | 94.7788 | 27.5  |
| 94.7688 | 18    | 94.8113 | 28.75 |
| 94.8    | 13    | 94.8463 | 26    |
| 94.835  | 13.5  | 94.8788 | 28.75 |
| 94.8688 | 13.75 | 94.9113 | 26.5  |
| 94.9025 | 13.25 | 94.945  | 30    |
| 94.9375 | 12.75 | 94.9813 | 26.75 |

|         |       |         |       |
|---------|-------|---------|-------|
| 94.9713 | 12.5  | 95.0113 | 25.25 |
| 95.0038 | 17.25 | 95.045  | 32.5  |
| 95.04   | 14.25 | 95.08   | 31.5  |
| 95.0725 | 13.5  | 95.1163 | 24    |
| 95.105  | 13.75 | 95.1475 | 26.5  |
| 95.1388 | 12.25 | 95.1775 | 26.25 |
| 95.1725 | 15.25 | 95.2088 | 25.75 |
| 95.205  | 12.25 | 95.2463 | 29    |
| 95.2388 | 15    | 95.2788 | 23.5  |
| 95.2688 | 11.75 | 95.3113 | 24.5  |
| 95.3    | 12.5  | 95.3463 | 25.25 |
| 95.335  | 16.5  | 95.3788 | 23    |
| 95.3688 | 12    | 95.4113 | 21.5  |
| 95.4025 | 15.75 | 95.445  | 28.25 |
| 95.4375 | 15.75 | 95.4813 | 26.75 |
| 95.4713 | 16.75 | 95.5113 | 24.25 |
| 95.5038 | 14.5  | 95.545  | 28.5  |
| 95.5388 | 16.75 | 95.58   | 23    |
| 95.5725 | 18    | 95.6163 | 23.5  |
| 95.605  | 13.75 | 95.6475 | 24    |
| 95.6388 | 17.5  | 95.6775 | 22.75 |
| 95.6725 | 13.75 | 95.7088 | 28.5  |
| 95.705  | 18.25 | 95.7463 | 21.25 |
| 95.7388 | 14.75 | 95.7788 | 26.5  |
| 95.7688 | 14.75 | 95.8113 | 26.75 |
| 95.8    | 14.75 | 95.8463 | 28.25 |
| 95.835  | 18.5  | 95.8788 | 25.25 |
| 95.8688 | 20.5  | 95.9113 | 27    |
| 95.9025 | 13.75 | 95.945  | 25    |
| 95.9375 | 15.5  | 95.9813 | 26    |
| 95.9713 | 15.5  | 96.0138 | 25.75 |
| 96.0038 | 17.75 | 96.045  | 25.25 |
| 96.0388 | 15    | 96.0825 | 28.75 |
| 96.0725 | 18.75 | 96.1175 | 26.75 |
| 96.105  | 17.75 | 96.1488 | 24    |
| 96.1388 | 14.75 | 96.1788 | 23.5  |
| 96.1725 | 11    | 96.2113 | 23.5  |
| 96.205  | 12.25 | 96.2488 | 28    |
| 96.2388 | 10.5  | 96.2813 | 23.5  |
| 96.27   | 11    | 96.3138 | 27.25 |
| 96.3    | 11.5  | 96.35   | 27.75 |
| 96.335  | 13.75 | 96.3813 | 20.5  |
| 96.3688 | 11.25 | 96.4138 | 26    |
| 96.4025 | 15    | 96.4475 | 28.25 |
| 96.4375 | 10    | 96.4825 | 25.5  |
| 96.4713 | 16.25 | 96.515  | 22.75 |
| 96.5038 | 13.5  | 96.5463 | 25.5  |
| 96.5388 | 12.75 | 96.5825 | 24.75 |
| 96.5725 | 12    | 96.6175 | 23    |
| 96.605  | 14.25 | 96.6488 | 20.75 |

|         |       |         |       |
|---------|-------|---------|-------|
| 96.6388 | 18    | 96.6788 | 25    |
| 96.6725 | 12    | 96.7138 | 23    |
| 96.705  | 16.25 | 96.7488 | 28.5  |
| 96.7363 | 13.75 | 96.7813 | 25.75 |
| 96.7688 | 12.25 | 96.8138 | 24.25 |
| 96.8    | 13.25 | 96.85   | 27.25 |
| 96.835  | 13.25 | 96.8813 | 27.75 |
| 96.8713 | 12.5  | 96.9138 | 25.75 |
| 96.9025 | 16.25 | 96.9475 | 26.5  |
| 96.9375 | 13.5  | 96.9825 | 28.5  |
| 96.9713 | 21.5  | 97.015  | 24    |
| 97.0038 | 16.25 | 97.0463 | 20.75 |
| 97.0388 | 14.75 | 97.0825 | 19.75 |
| 97.07   | 15.25 | 97.1175 | 22.25 |
| 97.105  | 14.5  | 97.1488 | 25.75 |
| 97.1388 | 14.5  | 97.1788 | 29.75 |
| 97.1725 | 12.5  | 97.2163 | 26.25 |
| 97.205  | 13.75 | 97.2488 | 24.25 |
| 97.2363 | 12.5  | 97.2813 | 22.75 |
| 97.27   | 16.75 | 97.3138 | 21.75 |
| 97.3    | 13.75 | 97.35   | 27    |
| 97.3375 | 11.75 | 97.3813 | 22    |
| 97.3688 | 11.5  | 97.4138 | 24.25 |
| 97.4025 | 17.5  | 97.4488 | 23    |
| 97.4375 | 12.5  | 97.4838 | 20    |
| 97.4713 | 12.75 | 97.5175 | 25.25 |
| 97.5038 | 11    | 97.55   | 23.75 |
| 97.5388 | 15.5  | 97.5838 | 20    |
| 97.57   | 16.25 | 97.6188 | 22.5  |
| 97.605  | 11    | 97.6513 | 27.5  |
| 97.6388 | 11    | 97.6813 | 19    |
| 97.6725 | 9.5   | 97.7188 | 18.75 |
| 97.705  | 12    | 97.7513 | 21    |
| 97.7363 | 13.75 | 97.7825 | 18.75 |
| 97.77   | 13    | 97.8163 | 21.75 |
| 97.8    | 14.5  | 97.8525 | 23.5  |
| 97.835  | 8.75  | 97.8838 | 21.25 |
| 97.8688 | 9.75  | 97.915  | 21    |
| 97.9025 | 7.5   | 97.9488 | 19    |
| 97.9375 | 13.5  | 97.9838 | 22.75 |
| 97.9713 | 13.25 | 98.0175 | 24.5  |
| 98.0038 | 12.5  | 98.05   | 23.5  |
| 98.04   | 14.75 | 98.0838 | 26.75 |
| 98.07   | 14.75 | 98.1188 | 22.5  |
| 98.105  | 14    | 98.1513 | 26    |
| 98.1388 | 15.75 | 98.1813 | 25    |
| 98.1725 | 12.25 | 98.2188 | 22    |
| 98.205  | 13    | 98.2513 | 24.75 |
| 98.2388 | 17.5  | 98.2825 | 23    |
| 98.27   | 13.75 | 98.3175 | 26.25 |

|         |       |         |       |
|---------|-------|---------|-------|
| 98.3    | 11.75 | 98.3525 | 24.5  |
| 98.335  | 19    | 98.3838 | 22.75 |
| 98.3688 | 17    | 98.415  | 24.5  |
| 98.4025 | 15    | 98.4488 | 22    |
| 98.435  | 12.75 | 98.4838 | 24.25 |
| 98.4713 | 18.5  | 98.5175 | 26.75 |
| 98.5038 | 18    | 98.55   | 26.25 |
| 98.5388 | 15.75 | 98.5838 | 22.25 |
| 98.57   | 16.75 | 98.6188 | 23.75 |
| 98.605  | 18    | 98.6513 | 20    |
| 98.6388 | 18    | 98.6813 | 23.25 |
| 98.6725 | 17    | 98.7188 | 24    |
| 98.705  | 17.25 | 98.755  | 22    |
| 98.7375 | 19.25 | 98.7825 | 22.75 |
| 98.7725 | 18.25 | 98.8163 | 21.75 |
| 98.8025 | 13.75 | 98.8525 | 20.75 |
| 98.8363 | 13.25 | 98.8838 | 22.25 |
| 98.8713 | 17    | 98.915  | 21.5  |
| 98.9075 | 13.5  | 98.9513 | 21.75 |
| 98.9375 | 17.5  | 98.9838 | 18.25 |
| 98.9738 | 16    | 99.0175 | 20.75 |
| 99.0063 | 17    | 99.05   | 21.5  |
| 99.04   | 14    | 99.0838 | 21.5  |
| 99.0713 | 12    | 99.1188 | 22    |
| 99.1088 | 12.25 | 99.1513 | 23.5  |
| 99.14   | 10.25 | 99.1813 | 26    |
| 99.1738 | 12.5  | 99.2188 | 28.25 |
| 99.2063 | 13.75 | 99.2525 | 24.5  |
| 99.2375 | 11.5  | 99.2825 | 24.25 |
| 99.2725 | 12.25 | 99.3163 | 27.75 |
| 99.3025 | 12    | 99.3525 | 30.5  |
| 99.3363 | 13.5  | 99.3838 | 26.5  |
| 99.3713 | 11.5  | 99.415  | 25    |
| 99.4075 | 14    | 99.4513 | 25.75 |
| 99.4375 | 11.75 | 99.4838 | 26    |
| 99.4738 | 11    | 99.5175 | 24.25 |
| 99.5038 | 10.5  | 99.55   | 23    |
| 99.54   | 13.25 | 99.5838 | 24.5  |
| 99.5713 | 14    | 99.6188 | 27.25 |
| 99.6063 | 12    | 99.6513 | 25.5  |
| 99.64   | 10.5  | 99.6813 | 28    |
| 99.6738 | 13    | 99.7188 | 24.75 |
| 99.7063 | 9.25  | 99.7525 | 25.75 |
| 99.7375 | 11.75 | 99.7825 | 26.75 |
| 99.7725 | 8.25  | 99.8163 | 24    |
| 99.8025 | 12.25 | 99.85   | 25    |
| 99.8363 | 14    | 99.8838 | 25    |
| 99.8738 | 11.25 | 99.915  | 25.5  |
| 99.9075 | 14.25 | 99.9513 | 26.75 |
| 99.9375 | 12.75 | 99.9838 | 25    |

|          |       |          |       |
|----------|-------|----------|-------|
| 99.9738  | 11.25 | 100.0188 | 25.5  |
| 100.0038 | 15.5  | 100.05   | 27    |
| 100.04   | 12.25 | 100.0838 | 22.75 |
| 100.0713 | 13.5  | 100.1188 | 25    |
| 100.1063 | 13.75 | 100.1513 | 26.25 |
| 100.14   | 14.25 | 100.1825 | 20.25 |
| 100.1738 | 8     | 100.2188 | 25.25 |
| 100.2063 | 8.25  | 100.2525 | 23.5  |
| 100.2375 | 9.25  | 100.2825 | 23.25 |
| 100.2725 | 9.25  | 100.3163 | 24    |
| 100.3025 | 10.5  | 100.3475 | 21.75 |
| 100.3363 | 12    | 100.3838 | 21.25 |
| 100.3713 | 15.5  | 100.415  | 23    |
| 100.4075 | 8.75  | 100.4513 | 21.5  |
| 100.4375 | 17    | 100.4838 | 24.5  |
| 100.4738 | 15.75 | 100.5175 | 20.25 |
| 100.5063 | 15    | 100.55   | 20.25 |
| 100.54   | 11    | 100.5838 | 22.5  |
| 100.5713 | 11.5  | 100.6188 | 20.5  |
| 100.6063 | 13.75 | 100.6513 | 23    |
| 100.6425 | 14.5  | 100.6813 | 21.75 |
| 100.6738 | 11.75 | 100.7188 | 23.5  |
| 100.7038 | 12.75 | 100.7525 | 20.5  |
| 100.7375 | 15.25 | 100.7825 | 21.75 |
| 100.7725 | 16.75 | 100.8163 | 24.5  |
| 100.8025 | 11.25 | 100.8475 | 20    |
| 100.8363 | 15    | 100.8838 | 20.75 |
| 100.8713 | 13.75 | 100.915  | 20.5  |
| 100.9075 | 14.5  | 100.9513 | 29.25 |
| 100.9375 | 13.75 | 100.9838 | 22.5  |
| 100.9738 | 14.25 | 101.0175 | 21.5  |
| 101.0038 | 12.5  | 101.05   | 18.5  |
| 101.04   | 15.25 | 101.085  | 17    |
| 101.0713 | 10    | 101.1188 | 18.75 |
| 101.1063 | 11    | 101.1513 | 22    |
| 101.1425 | 10.5  | 101.1813 | 16    |
| 101.1738 | 8.25  | 101.2188 | 17.25 |
| 101.2038 | 11.5  | 101.2525 | 20    |
| 101.2375 | 15.25 | 101.2825 | 19    |
| 101.2725 | 9     | 101.3163 | 23    |
| 101.3025 | 12.5  | 101.3475 | 22    |
| 101.335  | 13.75 | 101.3838 | 20.5  |
| 101.3713 | 13    | 101.415  | 21.5  |
| 101.4075 | 12.5  | 101.4525 | 22    |
| 101.4375 | 13.5  | 101.4863 | 17.5  |
| 101.4738 | 15    | 101.5175 | 22    |
| 101.5038 | 16    | 101.55   | 17    |
| 101.54   | 16.75 | 101.5838 | 20.75 |
| 101.5713 | 11.75 | 101.6188 | 18.25 |
| 101.6063 | 14.25 | 101.6513 | 24.25 |

|          |       |          |       |
|----------|-------|----------|-------|
| 101.6425 | 15    | 101.6825 | 22.75 |
| 101.6738 | 19.5  | 101.7188 | 23    |
| 101.7038 | 13    | 101.7525 | 28    |
| 101.7375 | 15.25 | 101.7825 | 17.25 |
| 101.7713 | 15.5  | 101.8163 | 18.75 |
| 101.8025 | 11.5  | 101.8475 | 18.75 |
| 101.835  | 16.75 | 101.8838 | 16.5  |
| 101.8713 | 16.25 | 101.915  | 16.25 |
| 101.91   | 11.75 | 101.95   | 18.25 |
| 101.9375 | 16    | 101.9888 | 21.5  |
| 101.9738 | 12.75 | 102.0175 | 22.25 |
| 102.0038 | 13    | 102.05   | 22.5  |
| 102.04   | 15.5  | 102.0838 | 21    |
| 102.0713 | 13    | 102.1188 | 18    |
| 102.1063 | 10.75 | 102.1513 | 23.25 |
| 102.1425 | 10.75 | 102.1825 | 20.5  |
| 102.1738 | 12    | 102.2188 | 24    |
| 102.2038 | 10.75 | 102.2525 | 24    |
| 102.2375 | 9.25  | 102.2825 | 22.75 |
| 102.2713 | 10.75 | 102.3163 | 23.25 |
| 102.3025 | 11    | 102.3475 | 23.25 |
| 102.335  | 11.75 | 102.3838 | 23.75 |
| 102.3713 | 13.5  | 102.415  | 19.75 |
| 102.4075 | 14.25 | 102.45   | 22.75 |
| 102.4375 | 10.75 | 102.4863 | 22.25 |
| 102.4725 | 10    | 102.5175 | 20.75 |
| 102.5038 | 9.75  | 102.55   | 27.5  |
| 102.54   | 13.25 | 102.5838 | 22    |
| 102.5713 | 10    | 102.6188 | 24    |
| 102.6038 | 14.75 | 102.6513 | 19    |
| 102.6425 | 14.25 | 102.6825 | 19.5  |
| 102.6738 | 13.75 | 102.7188 | 19.5  |
| 102.7038 | 9.75  | 102.7525 | 21.75 |
| 102.7375 | 15.5  | 102.7825 | 23.5  |
| 102.7713 | 11.25 | 102.8163 | 24.25 |
| 102.8025 | 9.25  | 102.8475 | 21.75 |
| 102.835  | 14.5  | 102.8838 | 22.25 |
| 102.8713 | 10.75 | 102.915  | 27.25 |
| 102.9075 | 10.5  | 102.95   | 23.25 |
| 102.9375 | 11.5  | 102.9863 | 20.25 |
| 102.9725 | 12.25 | 103.0175 | 21.75 |
| 103.0038 | 9.75  | 103.05   | 22.5  |
| 103.04   | 9.25  | 103.085  | 23.5  |
| 103.0713 | 11    | 103.1175 | 18.75 |
| 103.1038 | 13    | 103.1513 | 22    |
| 103.1425 | 11.5  | 103.1825 | 25.25 |
| 103.1738 | 12.5  | 103.2188 | 22.5  |
| 103.2038 | 12    | 103.2525 | 25.5  |
| 103.2375 | 11.25 | 103.2825 | 26.75 |
| 103.2713 | 10.75 | 103.3163 | 26    |

|          |       |
|----------|-------|
| 103.3025 | 15    |
| 103.335  | 12    |
| 103.3713 | 17    |
| 103.4075 | 19.25 |
| 103.4375 | 14.25 |
| 103.4725 | 15.5  |
| 103.5038 | 15.25 |
| 103.54   | 16.25 |
| 103.5713 | 18.5  |
| 103.6038 | 19.25 |
| 103.6425 | 17.75 |
| 103.6738 | 14.75 |
| 103.705  | 16.75 |
| 103.7375 | 14.5  |
| 103.7713 | 17.75 |
| 103.8025 | 13    |
| 103.835  | 13.75 |
| 103.8738 | 15.5  |
| 103.9075 | 14    |
| 103.9375 | 12.5  |
| 103.9725 | 14    |
| 104.0038 | 15    |
| 104.0375 | 16.5  |
| 104.0713 | 13.75 |
| 104.1038 | 15    |
| 104.1425 | 16    |
| 104.1738 | 11    |
| 104.2038 | 13.5  |
| 104.235  | 13.5  |
| 104.2713 | 15    |
| 104.3025 | 11.75 |
| 104.335  | 13    |
| 104.3738 | 12.5  |
| 104.4075 | 15.75 |
| 104.4375 | 12    |
| 104.4725 | 13.5  |
| 104.5038 | 10.25 |
| 104.5375 | 10.75 |
| 104.5713 | 12.5  |
| 104.6038 | 11    |
| 104.6425 | 14.75 |
| 104.6738 | 12    |
| 104.7038 | 11.5  |
| 104.735  | 16    |
| 104.7713 | 19    |
| 104.8025 | 13.75 |
| 104.835  | 14.75 |
| 104.8725 | 13.25 |
| 104.9075 | 17.25 |
| 104.9375 | 15.25 |

|          |       |
|----------|-------|
| 103.3475 | 22.25 |
| 103.3838 | 18.25 |
| 103.415  | 24.25 |
| 103.45   | 21    |
| 103.4863 | 25.5  |
| 103.5175 | 23.25 |
| 103.55   | 23.25 |
| 103.5838 | 26.25 |
| 103.6175 | 24    |
| 103.6513 | 25    |
| 103.6825 | 25.5  |
| 103.7213 | 24    |
| 103.7525 | 23    |
| 103.7825 | 22    |
| 103.8163 | 20.25 |
| 103.8475 | 22    |
| 103.8838 | 21.5  |
| 103.915  | 23.75 |
| 103.95   | 24.25 |
| 103.9875 | 22.25 |
| 104.0175 | 23    |
| 104.05   | 25.75 |
| 104.0838 | 24.5  |
| 104.1175 | 27.75 |
| 104.1513 | 22.5  |
| 104.1825 | 24.25 |
| 104.22   | 26.5  |
| 104.2525 | 25.75 |
| 104.285  | 25.5  |
| 104.3163 | 30.75 |
| 104.3475 | 28.75 |
| 104.3838 | 28.75 |
| 104.415  | 29.75 |
| 104.45   | 30    |
| 104.4863 | 24.5  |
| 104.5175 | 22    |
| 104.55   | 24.25 |
| 104.5838 | 23.5  |
| 104.6175 | 22.75 |
| 104.6513 | 25.75 |
| 104.6825 | 24.5  |
| 104.72   | 24.25 |
| 104.755  | 26    |
| 104.785  | 26    |
| 104.8163 | 26.5  |
| 104.8475 | 21.75 |
| 104.8838 | 25.5  |
| 104.915  | 28    |
| 104.95   | 25.25 |
| 104.9863 | 24.5  |

|          |       |
|----------|-------|
| 104.9725 | 15    |
| 105.0038 | 14    |
| 105.0375 | 19.5  |
| 105.0713 | 14.25 |
| 105.1038 | 9.5   |
| 105.1425 | 11.5  |
| 105.1738 | 14    |
| 105.2038 | 11.75 |
| 105.235  | 10    |
| 105.2713 | 12.25 |
| 105.3025 | 13.75 |
| 105.335  | 14.5  |
| 105.3725 | 15.75 |
| 105.41   | 14.25 |
| 105.4375 | 15.25 |
| 105.4725 | 10.75 |
| 105.5025 | 14.5  |
| 105.5375 | 11    |
| 105.5713 | 12.75 |
| 105.6038 | 12.5  |
| 105.6425 | 15.25 |
| 105.6738 | 13.5  |
| 105.7063 | 12.25 |
| 105.735  | 13.75 |
| 105.7713 | 12    |
| 105.8025 | 12.75 |
| 105.835  | 18.5  |
| 105.8738 | 14.25 |
| 105.9075 | 16    |
| 105.9375 | 15    |
| 105.9725 | 17.5  |
| 106.0025 | 17.5  |
| 106.0375 | 21.75 |
| 106.0713 | 17    |
| 106.1038 | 16    |
| 106.1425 | 20.25 |
| 106.1738 | 12.5  |
| 106.2038 | 11    |
| 106.235  | 13.5  |
| 106.2713 | 13.5  |
| 106.3025 | 12.25 |
| 106.335  | 14.75 |
| 106.3738 | 11.5  |
| 106.4075 | 11    |
| 106.4375 | 12.5  |
| 106.4725 | 12.5  |
| 106.5025 | 18    |
| 106.5375 | 10    |
| 106.5713 | 15.25 |
| 106.6038 | 14    |

|          |       |
|----------|-------|
| 105.0175 | 23.25 |
| 105.05   | 28.5  |
| 105.0838 | 25.75 |
| 105.1175 | 24    |
| 105.1513 | 22.75 |
| 105.185  | 26    |
| 105.22   | 20.75 |
| 105.2525 | 20.5  |
| 105.285  | 22.25 |
| 105.3163 | 27.75 |
| 105.3475 | 23.5  |
| 105.3838 | 22.25 |
| 105.415  | 22.25 |
| 105.45   | 21.25 |
| 105.4863 | 26.25 |
| 105.5175 | 21    |
| 105.55   | 25.5  |
| 105.5838 | 23    |
| 105.6175 | 21.25 |
| 105.6513 | 28.25 |
| 105.685  | 23.25 |
| 105.72   | 26.5  |
| 105.7525 | 27.5  |
| 105.7875 | 27.25 |
| 105.8163 | 27.5  |
| 105.8475 | 28.75 |
| 105.8838 | 27.75 |
| 105.915  | 27.25 |
| 105.9513 | 26.25 |
| 105.9863 | 22.5  |
| 106.0175 | 28.25 |
| 106.05   | 26.25 |
| 106.0838 | 25.75 |
| 106.1175 | 21    |
| 106.1513 | 25.75 |
| 106.185  | 24    |
| 106.22   | 23    |
| 106.2525 | 24.25 |
| 106.285  | 24.75 |
| 106.3163 | 23.25 |
| 106.3475 | 23.75 |
| 106.3813 | 19    |
| 106.415  | 20.5  |
| 106.4513 | 22.25 |
| 106.4838 | 22.5  |
| 106.5175 | 22.75 |
| 106.55   | 21.25 |
| 106.5838 | 20.5  |
| 106.6175 | 19.75 |
| 106.6513 | 17.25 |



|          |       |          |       |
|----------|-------|----------|-------|
| 106.6425 | 10.25 | 106.685  | 20.5  |
| 106.6738 | 13.25 | 106.72   | 19    |
| 106.7038 | 12.75 | 106.7525 | 19.5  |
| 106.735  | 13.75 | 106.785  | 21.25 |
| 106.7688 | 13    | 106.8163 | 23    |
| 106.8025 | 11.5  | 106.8475 | 23.25 |
| 106.835  | 11.25 | 106.8825 | 20.25 |
| 106.8738 | 10    | 106.915  | 20.75 |
| 106.9075 | 11.5  | 106.9513 | 19.75 |
| 106.9375 | 11.25 | 106.9838 | 17.75 |
| 106.9725 | 10.25 | 107.0175 | 20    |
| 107.005  | 10    | 107.05   | 16.25 |
| 107.0375 | 11    | 107.0838 | 18.5  |
| 107.0713 | 8     | 107.1175 | 23.5  |
| 107.105  | 12.25 | 107.1513 | 19.75 |
| 107.14   | 11.25 | 107.185  | 20.25 |
| 107.1738 | 12    | 107.22   | 22.25 |
| 107.2038 | 11.25 | 107.2525 | 18    |
| 107.235  | 12.25 | 107.285  | 19    |
| 107.2688 | 8.5   | 107.3163 | 19.5  |
| 107.3013 | 15.5  | 107.3475 | 15.25 |
| 107.335  | 12.25 | 107.3813 | 20.25 |
| 107.3738 | 11    | 107.415  | 17.75 |
| 107.4075 | 11    | 107.4513 | 18.25 |
| 107.4375 | 10.5  | 107.4838 | 22.75 |
| 107.4725 | 12.5  | 107.5175 | 19.75 |
| 107.505  | 9     | 107.55   | 22.5  |
| 107.5375 | 11    | 107.5838 | 17.75 |
| 107.5713 | 12    | 107.6175 | 21.25 |
| 107.6038 | 13.25 | 107.6513 | 26.5  |
| 107.64   | 10.25 | 107.685  | 22.25 |
| 107.6738 | 9.75  | 107.72   | 23.5  |
| 107.7038 | 10.75 | 107.7525 | 21.25 |
| 107.735  | 10.25 | 107.785  | 23.75 |
| 107.7688 | 13.5  | 107.8163 | 22.75 |
| 107.8013 | 14.25 | 107.8475 | 21.5  |
| 107.8375 | 12    | 107.8813 | 19.75 |
| 107.8738 | 13.75 | 107.915  | 20.25 |
| 107.9088 | 13.25 | 107.9513 | 23.25 |
| 107.94   | 11.75 | 107.9838 | 22.75 |
| 107.9725 | 14.25 | 108.0175 | 19    |
| 108.005  | 17.25 | 108.05   | 21.25 |
| 108.0375 | 16.5  | 108.0838 | 24.25 |
| 108.0713 | 15    | 108.1175 | 16.75 |
| 108.1038 | 16    | 108.1513 | 24.25 |
| 108.14   | 12.25 | 108.185  | 23.25 |
| 108.1738 | 13.5  | 108.22   | 18.75 |
| 108.2038 | 13.75 | 108.25   | 22.5  |
| 108.235  | 14.25 | 108.285  | 23.75 |
| 108.2688 | 11.25 | 108.3163 | 25.5  |

|          |       |
|----------|-------|
| 108.3013 | 12    |
| 108.335  | 18.25 |
| 108.3738 | 14    |
| 108.4075 | 15.25 |
| 108.4375 | 14    |
| 108.4725 | 15.5  |
| 108.505  | 16.25 |
| 108.5363 | 12.25 |
| 108.5713 | 13.25 |
| 108.6038 | 13.25 |
| 108.64   | 17.25 |
| 108.6738 | 15    |
| 108.7038 | 11.75 |
| 108.735  | 12.5  |
| 108.7688 | 13.25 |
| 108.8013 | 16.75 |
| 108.835  | 14    |
| 108.8738 | 16    |
| 108.9075 | 12.25 |
| 108.9375 | 14.5  |
| 108.9725 | 11.75 |
| 109.005  | 15.25 |
| 109.0363 | 16.75 |
| 109.0713 | 16.25 |
| 109.1063 | 13    |
| 109.14   | 15.5  |
| 109.1738 | 13.75 |
| 109.2038 | 13.25 |
| 109.235  | 13    |
| 109.2688 | 14.25 |
| 109.3013 | 11.25 |
| 109.335  | 14.75 |
| 109.3738 | 15.5  |
| 109.4063 | 11.75 |
| 109.4375 | 14.75 |
| 109.4725 | 12.75 |
| 109.505  | 13.5  |
| 109.5363 | 13.25 |
| 109.5713 | 12    |
| 109.6038 | 11.25 |
| 109.64   | 14    |
| 109.6738 | 14.75 |
| 109.7038 | 11    |
| 109.735  | 11.25 |
| 109.7688 | 14.5  |
| 109.7988 | 15    |
| 109.835  | 16.75 |
| 109.8738 | 14.25 |
| 109.9063 | 10.75 |
| 109.9375 | 16    |

|          |       |
|----------|-------|
| 108.3475 | 24.25 |
| 108.3813 | 23.25 |
| 108.4163 | 24.75 |
| 108.4513 | 21.5  |
| 108.4838 | 24    |
| 108.5175 | 21    |
| 108.55   | 25.75 |
| 108.5838 | 28.5  |
| 108.6175 | 23.5  |
| 108.6513 | 22.75 |
| 108.6875 | 24.5  |
| 108.72   | 24.5  |
| 108.75   | 23    |
| 108.785  | 24    |
| 108.8163 | 24.25 |
| 108.8475 | 22.75 |
| 108.8813 | 21.5  |
| 108.9163 | 25.75 |
| 108.9513 | 23.25 |
| 108.9838 | 24.5  |
| 109.0188 | 25.75 |
| 109.05   | 27.25 |
| 109.0838 | 25.25 |
| 109.1175 | 26.25 |
| 109.1513 | 27.75 |
| 109.1875 | 22.75 |
| 109.22   | 26    |
| 109.25   | 26.5  |
| 109.285  | 24    |
| 109.3163 | 25.5  |
| 109.3475 | 22.5  |
| 109.3813 | 23.75 |
| 109.4163 | 25.75 |
| 109.4513 | 27    |
| 109.4838 | 24.75 |
| 109.5188 | 27.75 |
| 109.55   | 25.75 |
| 109.5838 | 23.5  |
| 109.6175 | 26.75 |
| 109.65   | 27    |
| 109.6875 | 23.25 |
| 109.72   | 30.75 |
| 109.75   | 25.25 |
| 109.785  | 25    |
| 109.8175 | 22    |
| 109.85   | 24    |
| 109.8813 | 23.25 |
| 109.9163 | 23.5  |
| 109.9513 | 24    |
| 109.9838 | 23.25 |

|          |       |          |       |
|----------|-------|----------|-------|
| 109.9725 | 15.5  | 110.0188 | 24.5  |
| 110.005  | 13.5  | 110.05   | 19.75 |
| 110.0363 | 15    | 110.0838 | 24    |
| 110.0713 | 14.75 | 110.1175 | 22.75 |
| 110.1038 | 15.5  | 110.15   | 18.25 |
| 110.14   | 18.75 | 110.1875 | 23    |
| 110.1738 | 14    | 110.22   | 16.5  |
| 110.2038 | 15.75 | 110.25   | 20.25 |
| 110.235  | 16.5  | 110.285  | 19    |
| 110.2688 | 14    | 110.3163 | 20.5  |
| 110.2988 | 11.25 | 110.3475 | 19.75 |
| 110.335  | 12.25 | 110.3813 | 23.5  |
| 110.3738 | 12.75 | 110.4163 | 19.75 |
| 110.4063 | 14.5  | 110.4513 | 18    |
| 110.4375 | 13    | 110.4838 | 20    |
| 110.4725 | 14.5  | 110.5175 | 18.75 |
| 110.505  | 13.25 | 110.55   | 21.75 |
| 110.5363 | 13.75 | 110.5838 | 24    |
| 110.5713 | 13    | 110.6175 | 21    |
| 110.6038 | 17    | 110.65   | 18.25 |
| 110.64   | 16.5  | 110.6875 | 22.25 |
| 110.6738 | 16.75 | 110.72   | 15    |
| 110.7038 | 13.5  | 110.75   | 22.25 |
| 110.735  | 13.75 | 110.785  | 20.75 |
| 110.7688 | 15.75 | 110.8163 | 17.75 |
| 110.7988 | 15.25 | 110.8475 | 21.5  |
| 110.835  | 17    | 110.8813 | 21    |
| 110.8738 | 12.25 | 110.9163 | 19.75 |
| 110.9063 | 13.25 | 110.9513 | 20.5  |
| 110.9375 | 13    | 110.9838 | 21    |
| 110.9725 | 13.5  | 111.0175 | 21.25 |
| 111.005  | 14.5  | 111.05   | 17.5  |
| 111.0363 | 13.25 | 111.0838 | 18.5  |
| 111.0688 | 16.75 | 111.1175 | 17.5  |
| 111.1038 | 14.5  | 111.1525 | 18    |
| 111.14   | 16.25 | 111.1875 | 18.25 |
| 111.1738 | 11.25 | 111.22   | 14.75 |
| 111.2038 | 14.25 | 111.25   | 21    |
| 111.235  | 14    | 111.285  | 17.25 |
| 111.2688 | 12.25 | 111.3163 | 19    |
| 111.2988 | 14.5  | 111.35   | 26.75 |
| 111.335  | 15.75 | 111.3825 | 18.75 |
| 111.3738 | 12    | 111.42   | 17.5  |
| 111.4063 | 15    | 111.4563 | 18.5  |
| 111.4375 | 13.5  | 111.485  | 15.5  |
| 111.4725 | 16.75 | 111.5188 | 20.25 |
| 111.505  | 13.5  | 111.5513 | 16.5  |
| 111.5363 | 9.75  | 111.585  | 14.25 |
| 111.5688 | 16.25 | 111.62   | 17.25 |
| 111.6038 | 11.5  | 111.6563 | 19    |

|          |       |          |       |
|----------|-------|----------|-------|
| 111.64   | 14.5  | 111.6888 | 18    |
| 111.6713 | 14.5  | 111.7225 | 13.75 |
| 111.7038 | 14    | 111.7538 | 17.25 |
| 111.735  | 15.5  | 111.7888 | 19    |
| 111.7688 | 16.25 | 111.8213 | 20    |
| 111.7988 | 14    | 111.8538 | 18.5  |
| 111.835  | 16.5  | 111.885  | 14    |
| 111.8738 | 16    | 111.9213 | 21    |
| 111.9063 | 14.5  | 111.9563 | 20    |
| 111.9375 | 15.75 | 111.9875 | 18.5  |
| 111.9725 | 16.25 | 112.0213 | 22.75 |
| 112.005  | 13.25 | 112.0538 | 19.25 |
| 112.0363 | 13.25 | 112.0838 | 19.25 |
| 112.0688 | 15.75 | 112.1213 | 21    |
| 112.1038 | 17    | 112.16   | 16    |
| 112.14   | 11.25 | 112.1913 | 18.5  |
| 112.1713 | 12.25 | 112.2238 | 20    |
| 112.2038 | 9.75  | 112.2538 | 19    |
| 112.2363 | 14.25 | 112.2863 | 15.75 |
| 112.2688 | 12    | 112.3213 | 20.5  |
| 112.2988 | 14.25 | 112.3525 | 21    |
| 112.335  | 13.25 | 112.385  | 20.75 |
| 112.375  | 12.5  | 112.4213 | 19.75 |
| 112.4063 | 11.25 | 112.4563 | 16.25 |
| 112.4375 | 12.25 | 112.4875 | 23    |
| 112.4725 | 12.25 | 112.5213 | 22    |
| 112.505  | 9.5   | 112.5538 | 20.5  |
| 112.5363 | 13.25 | 112.5838 | 21.25 |
| 112.5663 | 11.5  | 112.6213 | 19.75 |
| 112.605  | 15.5  | 112.66   | 20.25 |
| 112.64   | 11.5  | 112.6913 | 20.5  |
| 112.6713 | 11.25 | 112.7238 | 21.5  |
| 112.7038 | 11.75 | 112.7538 | 18.5  |
| 112.7363 | 9.5   | 112.7863 | 20.5  |
| 112.7688 | 10.25 | 112.8213 | 21    |
| 112.7988 | 12.75 | 112.8525 | 23.5  |
| 112.835  | 8.5   | 112.885  | 18.75 |
| 112.875  | 12.5  | 112.9213 | 19    |
| 112.9063 | 12.5  | 112.9563 | 21.25 |
| 112.9375 | 9.25  | 112.9875 | 17.5  |
| 112.9725 | 11.25 | 113.0213 | 21.5  |
| 113.005  | 10    | 113.0538 | 22.5  |
| 113.0363 | 11.25 | 113.0838 | 20.75 |
| 113.0663 | 10.75 | 113.1213 | 20.5  |
| 113.105  | 9.75  | 113.1575 | 20.5  |
| 113.14   | 9     | 113.1925 | 21.5  |
| 113.1713 | 13    | 113.2238 | 20.75 |
| 113.2038 | 9     | 113.2538 | 19.25 |
| 113.2363 | 9.25  | 113.2863 | 21    |
| 113.2688 | 13    | 113.3213 | 22.5  |

|          |       |          |       |
|----------|-------|----------|-------|
| 113.2988 | 9     | 113.3525 | 18.25 |
| 113.3338 | 8.75  | 113.3875 | 17.75 |
| 113.375  | 9.5   | 113.4213 | 14.5  |
| 113.4063 | 12.75 | 113.4563 | 18.5  |
| 113.4363 | 14    | 113.4875 | 18.25 |
| 113.4725 | 9     | 113.5213 | 14    |
| 113.505  | 16.25 | 113.5538 | 20.5  |
| 113.5363 | 16.5  | 113.5838 | 23.25 |
| 113.5663 | 14.5  | 113.6225 | 18.25 |
| 113.605  | 19    | 113.6575 | 22    |
| 113.64   | 20.5  | 113.69   | 20.5  |
| 113.6713 | 19.75 | 113.7238 | 21    |
| 113.7038 | 12.25 | 113.7538 | 21    |
| 113.7363 | 17.25 | 113.7863 | 22.25 |
| 113.7688 | 16    | 113.8213 | 20    |
| 113.7988 | 13    | 113.8525 | 17.75 |
| 113.8338 | 13.25 | 113.8875 | 19.75 |
| 113.875  | 14.25 | 113.9213 | 18    |
| 113.9063 | 14    | 113.9563 | 22    |
| 113.9363 | 12.25 | 113.9875 | 19.5  |
| 113.9725 | 11.5  | 114.0213 | 20.5  |
| 114.005  | 14.75 | 114.0525 | 25.5  |
| 114.0363 | 13.25 | 114.0838 | 21    |
| 114.0663 | 16.75 | 114.1213 | 22.75 |
| 114.105  | 12.25 | 114.1575 | 22.75 |
| 114.14   | 13.25 | 114.19   | 18    |
| 114.1713 | 14.75 | 114.2238 | 21.75 |
| 114.2038 | 11.5  | 114.2538 | 24.25 |
| 114.2363 | 14.75 | 114.2863 | 19.75 |
| 114.2688 | 15    | 114.3213 | 24.75 |
| 114.2988 | 12.5  | 114.3525 | 19.5  |
| 114.3338 | 15.75 | 114.39   | 22.5  |
| 114.375  | 12.75 | 114.4213 | 19    |
| 114.4063 | 14.25 | 114.4563 | 18.5  |
| 114.4363 | 13.25 | 114.4875 | 20.25 |
| 114.4725 | 14.25 | 114.5213 | 22    |
| 114.505  | 19.25 | 114.5525 | 21    |
| 114.5363 | 20    | 114.5838 | 19.25 |
| 114.5663 | 16.25 | 114.6213 | 28    |
| 114.6025 | 15    | 114.6575 | 26.5  |
| 114.6413 | 17.5  | 114.69   | 27.25 |
| 114.6713 | 17    | 114.7238 | 22.75 |
| 114.7038 | 12.75 | 114.7538 | 26.25 |
| 114.7363 | 15.5  | 114.7863 | 21    |
| 114.7688 | 19.5  | 114.8213 | 21    |
| 114.7988 | 16.75 | 114.8525 | 26.25 |
| 114.8338 | 15.5  | 114.89   | 21.5  |
| 114.875  | 15.5  | 114.9213 | 23.75 |
| 114.9063 | 15.5  | 114.9563 | 19.75 |
| 114.9363 | 11    | 114.9875 | 28    |

|          |       |          |       |
|----------|-------|----------|-------|
| 114.9725 | 16.75 | 115.0213 | 23.25 |
| 115.005  | 16.75 | 115.0525 | 24.25 |
| 115.0363 | 11.25 | 115.0838 | 28.75 |
| 115.0663 | 14.5  | 115.1225 | 30.75 |
| 115.1025 | 14    | 115.1575 | 23.5  |
| 115.14   | 11.25 | 115.19   | 24    |
| 115.1713 | 15.25 | 115.2238 | 23.25 |
| 115.2038 | 15.25 | 115.2538 | 25    |
| 115.2388 | 13.25 | 115.2863 | 25.25 |
| 115.2688 | 10.75 | 115.3213 | 25.25 |
| 115.2988 | 13    | 115.3525 | 24.75 |
| 115.3338 | 10    | 115.39   | 24.5  |
| 115.375  | 12.75 | 115.4213 | 23.75 |
| 115.4063 | 11.25 | 115.4563 | 28.75 |
| 115.4363 | 9.25  | 115.4875 | 24.5  |
| 115.4725 | 15.5  | 115.5213 | 24.25 |
| 115.505  | 15    | 115.5525 | 27    |
| 115.5363 | 13.25 | 115.5838 | 25.5  |
| 115.5663 | 14.75 | 115.6238 | 29.75 |
| 115.605  | 14.25 | 115.6575 | 27    |
| 115.64   | 12.25 | 115.69   | 29.25 |
| 115.6713 | 14    | 115.7238 | 22.5  |
| 115.7038 | 14.25 | 115.7538 | 24.75 |
| 115.7363 | 15.75 | 115.7863 | 27.5  |
| 115.7688 | 16.5  | 115.8188 | 25    |
| 115.7988 | 16    | 115.8525 | 25.5  |
| 115.8363 | 16.25 | 115.89   | 22.25 |
| 115.875  | 13.25 | 115.9213 | 27    |
| 115.9063 | 13    | 115.9563 | 23.75 |
| 115.9363 | 14.25 | 115.9875 | 25    |
| 115.9725 | 13    | 116.0213 | 23.25 |
| 116.005  | 12.5  | 116.0525 | 22.25 |
| 116.0363 | 10.75 | 116.0838 | 20.5  |
| 116.0663 | 9.75  | 116.1225 | 24.75 |
| 116.105  | 9.5   | 116.1575 | 20.25 |
| 116.14   | 9.75  | 116.19   | 23    |
| 116.1713 | 14    | 116.2238 | 22.25 |
| 116.2013 | 9     | 116.2538 | 23    |
| 116.2363 | 13.25 | 116.2863 | 24.75 |
| 116.2688 | 12    | 116.3188 | 21.5  |
| 116.2988 | 10.5  | 116.3525 | 23.25 |
| 116.3363 | 11    | 116.39   | 20.75 |
| 116.375  | 7.75  | 116.4213 | 25.75 |
| 116.4063 | 12    | 116.4538 | 26    |
| 116.4363 | 13    | 116.4875 | 23.25 |
| 116.4725 | 13    | 116.5225 | 25.75 |
| 116.505  | 15.75 | 116.5525 | 25.5  |
| 116.5363 | 15.75 | 116.5838 | 29    |
| 116.5663 | 13.75 | 116.6238 | 28.75 |
| 116.605  | 11.75 | 116.6575 | 27.25 |

|          |       |          |       |
|----------|-------|----------|-------|
| 116.6425 | 14.5  | 116.69   | 24.25 |
| 116.6713 | 11.5  | 116.7238 | 22.75 |
| 116.7013 | 10    | 116.7538 | 26.5  |
| 116.7363 | 12.75 | 116.7863 | 24.25 |
| 116.7688 | 15    | 116.8188 | 24.25 |
| 116.7988 | 13.5  | 116.855  | 25.75 |
| 116.8363 | 14.75 | 116.89   | 26    |
| 116.8738 | 11    | 116.9213 | 27.25 |
| 116.9063 | 11.5  | 116.9538 | 26.25 |
| 116.9363 | 10.25 | 116.9875 | 22.5  |
| 116.9725 | 16.75 | 117.0213 | 25.25 |
| 117.005  | 17    | 117.0525 | 26.5  |
| 117.0375 | 15    | 117.0863 | 25.75 |
| 117.0663 | 13    | 117.1238 | 25.5  |
| 117.105  | 14.75 | 117.1575 | 23.75 |
| 117.14   | 12.25 | 117.19   | 27.25 |
| 117.1725 | 15.5  | 117.2238 | 24.25 |
| 117.2013 | 14    | 117.2538 | 25.75 |
| 117.2363 | 12    | 117.2863 | 25.75 |
| 117.2688 | 16.5  | 117.3188 | 26.5  |
| 117.2988 | 17.75 | 117.355  | 21.5  |
| 117.3363 | 14    | 117.39   | 22.25 |
| 117.3738 | 16.25 | 117.4213 | 27    |
| 117.4063 | 13.75 | 117.4538 | 22.25 |
| 117.4363 | 14    | 117.4875 | 22.5  |
| 117.475  | 15.75 | 117.5213 | 22.5  |
| 117.505  | 15    | 117.5525 | 26    |
| 117.5363 | 14.25 | 117.5825 | 28    |
| 117.5663 | 14.25 | 117.6238 | 22.75 |
| 117.605  | 17.75 | 117.6575 | 24.25 |
| 117.64   | 19.75 | 117.69   | 25.25 |
| 117.6713 | 20.25 | 117.7238 | 25    |
| 117.7013 | 14    | 117.7538 | 25.75 |
| 117.7363 | 16.75 | 117.7863 | 21.5  |
| 117.7688 | 16    | 117.8188 | 21.5  |
| 117.7988 | 17.75 | 117.855  | 29    |
| 117.8363 | 16    | 117.89   | 23.75 |
| 117.8738 | 19.25 | 117.92   | 22    |
| 117.9063 | 19.5  | 117.9538 | 23.25 |
| 117.9363 | 17    | 117.9875 | 22.25 |
| 117.975  | 15.5  | 118.0213 | 21.75 |
| 118.005  | 14.5  | 118.0525 | 20    |
| 118.0363 | 15    | 118.0825 | 22.5  |
| 118.0688 | 14.5  | 118.1238 | 22    |
| 118.105  | 12.75 | 118.1575 | 22    |
| 118.14   | 12.25 | 118.19   | 24    |
| 118.1713 | 11.25 | 118.2238 | 23.75 |
| 118.2013 | 12.5  | 118.2538 | 27.5  |
| 118.2363 | 11.5  | 118.2863 | 21.75 |
| 118.2688 | 11.5  | 118.3188 | 22    |

|          |       |          |       |
|----------|-------|----------|-------|
| 118.2988 | 9.75  | 118.3575 | 26.75 |
| 118.3388 | 14    | 118.39   | 23.25 |
| 118.3738 | 12.25 | 118.42   | 23    |
| 118.4063 | 13.25 | 118.4538 | 20.25 |
| 118.4363 | 11    | 118.4875 | 23.75 |
| 118.475  | 13    | 118.5213 | 23.5  |
| 118.505  | 11    | 118.5525 | 23.25 |
| 118.5363 | 13.25 | 118.5838 | 28.5  |
| 118.57   | 17    | 118.6238 | 20    |
| 118.605  | 16    | 118.6575 | 24    |
| 118.64   | 13.5  | 118.69   | 20.75 |
| 118.6713 | 13.25 | 118.7238 | 20.75 |
| 118.7013 | 11.75 | 118.7538 | 21.25 |
| 118.7363 | 12.25 | 118.7863 | 20    |
| 118.7688 | 11.75 | 118.8188 | 20.5  |
| 118.7988 | 13.5  | 118.8588 | 18.5  |
| 118.8388 | 13.5  | 118.89   | 17.5  |
| 118.8738 | 17.25 | 118.92   | 19.5  |
| 118.9063 | 16    | 118.9538 | 21    |
| 118.9363 | 16    | 118.9875 | 19    |
| 118.9725 | 13.25 | 119.0213 | 19.25 |
| 119.005  | 16.5  | 119.0525 | 22    |
| 119.0375 | 15.5  | 119.0838 | 19.25 |
| 119.07   | 12.5  | 119.1238 | 18.75 |
| 119.105  | 17.25 | 119.1575 | 18.75 |
| 119.1375 | 12    | 119.19   | 24.5  |
| 119.1713 | 15.5  | 119.2213 | 22.75 |
| 119.2013 | 14.25 | 119.2538 | 21.75 |
| 119.2363 | 10.5  | 119.2863 | 23.25 |
| 119.2688 | 13    | 119.3188 | 20.75 |
| 119.2988 | 14.5  | 119.355  | 26.75 |
| 119.3388 | 10.25 | 119.39   | 25.25 |
| 119.3738 | 11.5  | 119.42   | 24.75 |
| 119.4063 | 13.75 | 119.4563 | 29.75 |
| 119.4363 | 14.5  | 119.4875 | 22    |
| 119.4725 | 16.75 | 119.5213 | 20    |
| 119.505  | 10.25 | 119.5525 | 20.75 |
| 119.5363 | 11    | 119.5838 | 20.25 |
| 119.57   | 11    | 119.6238 | 19.5  |
| 119.605  | 12.25 | 119.6575 | 19    |
| 119.6375 | 14.75 | 119.69   | 25.5  |
| 119.6713 | 13    | 119.7213 | 20.5  |
| 119.7013 | 14.5  | 119.7538 | 23.25 |
| 119.7363 | 12.5  | 119.7863 | 21    |
| 119.7688 | 10    | 119.8188 | 22.75 |
| 119.7988 | 12    | 119.855  | 17.5  |
| 119.8388 | 12.25 | 119.89   | 22    |
| 119.8738 | 8.75  | 119.92   | 26    |
| 119.9063 | 11    | 119.9538 | 19.75 |
| 119.9363 | 15.5  | 119.9875 | 15.5  |



|          |       |          |       |
|----------|-------|----------|-------|
| 119.9725 | 9.75  | 120.02   | 20.25 |
| 120.005  | 15.75 | 120.0525 | 17.25 |
| 120.0363 | 15    | 120.0838 | 17    |
| 120.07   | 14    | 120.1238 | 16.5  |
| 120.105  | 13.75 | 120.1575 | 19.25 |
| 120.1375 | 13.75 | 120.19   | 20.25 |
| 120.1713 | 12.75 | 120.2213 | 26.25 |
| 120.2013 | 16.5  | 120.2538 | 25.25 |
| 120.2363 | 11.75 | 120.2888 | 21.75 |
| 120.2688 | 16    | 120.3213 | 20.25 |
| 120.2988 | 13.5  | 120.355  | 20.75 |
| 120.3388 | 13.5  | 120.39   | 22.25 |
| 120.3738 | 13.25 | 120.42   | 18.25 |
| 120.4063 | 15    | 120.4538 | 24    |
| 120.4363 | 12    | 120.4875 | 19.75 |
| 120.4725 | 13.5  | 120.52   | 22.25 |
| 120.505  | 13.25 | 120.5525 | 20.25 |
| 120.5363 | 15.5  | 120.5838 | 20.5  |
| 120.57   | 13.75 | 120.6238 | 18    |
| 120.6075 | 12    | 120.6588 | 18.75 |
| 120.6375 | 12.5  | 120.69   | 23    |
| 120.6713 | 13    | 120.7213 | 21.25 |
| 120.7013 | 11.5  | 120.7538 | 22.25 |
| 120.7363 | 13    | 120.7863 | 17.25 |
| 120.7688 | 13.5  | 120.8213 | 16.5  |
| 120.7988 | 11    | 120.855  | 14.5  |
| 120.8388 | 15.25 | 120.89   | 20.25 |
| 120.8738 | 13.25 | 120.92   | 21.25 |
| 120.9063 | 10.5  | 120.9538 | 15.75 |
| 120.9363 | 12.75 | 120.9875 | 17.25 |
| 120.9725 | 14.75 | 121.02   | 21.25 |
| 121.005  | 9.75  | 121.0525 | 19    |
| 121.0363 | 15.5  | 121.0838 | 21.25 |
| 121.0713 | 12.25 | 121.1238 | 20.25 |
| 121.105  | 15    | 121.1575 | 20.25 |
| 121.1375 | 12.75 | 121.19   | 24    |
| 121.1713 | 11.25 | 121.2213 | 21.75 |
| 121.2013 | 13    | 121.2538 | 18    |
| 121.2363 | 9.25  | 121.2863 | 22.25 |
| 121.2688 | 12.25 | 121.3213 | 18.25 |
| 121.2988 | 10    | 121.355  | 21    |
| 121.3388 | 12.75 | 121.39   | 22    |
| 121.3738 | 12.25 | 121.42   | 18    |
| 121.405  | 13.25 | 121.4538 | 18.5  |
| 121.4363 | 10.25 | 121.4863 | 20    |
| 121.4725 | 12    | 121.52   | 19.25 |
| 121.505  | 13.5  | 121.5525 | 20.75 |
| 121.5363 | 11.75 | 121.5863 | 20.5  |
| 121.5713 | 15    | 121.6225 | 18    |
| 121.605  | 15.75 | 121.6575 | 18    |

|          |       |          |       |
|----------|-------|----------|-------|
| 121.6375 | 13.5  | 121.69   | 18.75 |
| 121.6713 | 12    | 121.7213 | 16.25 |
| 121.7038 | 12.5  | 121.7538 | 18.25 |
| 121.7363 | 15.25 | 121.7863 | 19.75 |
| 121.7688 | 13.25 | 121.8213 | 17.25 |
| 121.7988 | 15.25 | 121.855  | 18.5  |
| 121.8388 | 10.25 | 121.89   | 16.25 |
| 121.8738 | 12.5  | 121.92   | 20.25 |
| 121.905  | 16.5  | 121.9538 | 17.75 |
| 121.9363 | 15.75 | 121.9863 | 14.75 |
| 121.9725 | 15    | 122.02   | 14.25 |
| 122.005  | 14    | 122.0538 | 16.5  |
| 122.0363 | 14.5  | 122.0863 | 15.75 |
| 122.0713 | 11.5  | 122.1225 | 19.25 |
| 122.105  | 16.25 | 122.1575 | 18.75 |
| 122.1375 | 14.25 | 122.19   | 22    |
| 122.1713 | 13.5  | 122.2213 | 17.25 |
| 122.2038 | 12.25 | 122.2538 | 16    |
| 122.235  | 12    | 122.2863 | 19.25 |
| 122.2688 | 15    | 122.3213 | 20    |
| 122.3    | 17    | 122.355  | 19    |
| 122.3388 | 16    | 122.39   | 21.75 |
| 122.375  | 13.25 | 122.42   | 18.5  |
| 122.4063 | 11    | 122.4538 | 19.75 |
| 122.44   | 14.25 | 122.4863 | 20.75 |
| 122.4738 | 12.25 | 122.52   | 17    |
| 122.5063 | 15    | 122.5538 | 19    |
| 122.5375 | 13.75 | 122.5863 | 17.5  |
| 122.5725 | 10.75 | 122.6225 | 19.25 |
| 122.6075 | 12.5  | 122.6575 | 19.75 |
| 122.64   | 16    | 122.69   | 19.25 |
| 122.6738 | 12.5  | 122.7213 | 17.5  |
| 122.7063 | 13.75 | 122.7538 | 15    |
| 122.7375 | 14.5  | 122.7863 | 20.75 |
| 122.7713 | 10.5  | 122.8225 | 17.5  |
| 122.805  | 13.75 | 122.8575 | 20.5  |
| 122.8413 | 11    | 122.89   | 18.75 |
| 122.875  | 9.75  | 122.92   | 17    |
| 122.9063 | 14    | 122.9538 | 22.75 |
| 122.94   | 12.5  | 122.9863 | 17.25 |
| 122.9738 | 13.75 | 123.02   | 16.5  |
| 123.0063 | 11.5  | 123.055  | 19.25 |
| 123.0375 | 12.75 | 123.0888 | 17.75 |
| 123.0725 | 12.5  | 123.1225 | 18    |
| 123.1075 | 15.25 | 123.1575 | 18    |
| 123.14   | 14.25 | 123.19   | 16.75 |
| 123.1738 | 11.25 | 123.2213 | 18.75 |
| 123.2063 | 14.25 | 123.2538 | 16    |
| 123.2375 | 12.25 | 123.2838 | 19.25 |
| 123.2713 | 11.25 | 123.3225 | 20.5  |

|          |       |
|----------|-------|
| 123.3075 | 11    |
| 123.3413 | 12.25 |
| 123.375  | 12    |
| 123.4063 | 11.25 |
| 123.44   | 11.5  |
| 123.4738 | 13.5  |
| 123.5063 | 13    |
| 123.5375 | 13.5  |
| 123.5725 | 14.25 |
| 123.6075 | 12    |
| 123.64   | 13    |
| 123.6713 | 14.25 |
| 123.7063 | 11.25 |
| 123.7375 | 10.75 |
| 123.7713 | 10.75 |
| 123.8075 | 12.5  |
| 123.8413 | 13    |
| 123.875  | 13.25 |
| 123.9063 | 16    |
| 123.94   | 16.25 |
| 123.975  | 16.5  |
| 124.0063 | 12.75 |
| 124.0375 | 15.25 |
| 124.0725 | 17.25 |
| 124.105  | 15    |
| 124.14   | 15.75 |
| 124.1713 | 13.5  |
| 124.2063 | 15.5  |
| 124.2375 | 15.25 |
| 124.2713 | 15.25 |
| 124.3075 | 13.5  |
| 124.3413 | 15    |
| 124.375  | 15    |
| 124.4063 | 15    |
| 124.44   | 12.5  |
| 124.4738 | 11.5  |
| 124.5063 | 14.5  |
| 124.5375 | 17.75 |
| 124.5725 | 13.5  |
| 124.605  | 15.5  |
| 124.64   | 11    |
| 124.6713 | 15.5  |
| 124.7063 | 15.75 |
| 124.7375 | 13.5  |
| 124.7713 | 14.25 |
| 124.8075 | 13.75 |
| 124.8413 | 18.75 |
| 124.875  | 15.25 |
| 124.9063 | 12    |
| 124.94   | 15.5  |

|          |       |
|----------|-------|
| 123.3538 | 23    |
| 123.39   | 20.25 |
| 123.42   | 19.5  |
| 123.4538 | 20.75 |
| 123.4863 | 14.5  |
| 123.52   | 19    |
| 123.5538 | 19.25 |
| 123.5863 | 22.75 |
| 123.62   | 20.75 |
| 123.6575 | 23    |
| 123.69   | 24.5  |
| 123.7213 | 21.75 |
| 123.7538 | 25    |
| 123.7838 | 21.5  |
| 123.8225 | 21.25 |
| 123.8538 | 21.75 |
| 123.89   | 20.25 |
| 123.92   | 22.75 |
| 123.9538 | 19.75 |
| 123.9863 | 24.75 |
| 124.02   | 18.75 |
| 124.0538 | 25.5  |
| 124.0863 | 18.75 |
| 124.12   | 25    |
| 124.1588 | 22.75 |
| 124.19   | 22.5  |
| 124.2213 | 21.5  |
| 124.2513 | 28.25 |
| 124.2838 | 24.75 |
| 124.3225 | 24.75 |
| 124.3538 | 27.25 |
| 124.39   | 28.5  |
| 124.42   | 23.75 |
| 124.4538 | 24.5  |
| 124.4863 | 26    |
| 124.52   | 22.25 |
| 124.5538 | 21.5  |
| 124.5863 | 22    |
| 124.62   | 24    |
| 124.6575 | 19.5  |
| 124.69   | 25    |
| 124.7225 | 20    |
| 124.7513 | 26.5  |
| 124.7863 | 23.5  |
| 124.8225 | 24.5  |
| 124.8538 | 18.75 |
| 124.8875 | 26.75 |
| 124.92   | 19.25 |
| 124.9538 | 28.5  |
| 124.9863 | 20.25 |

|          |       |          |       |
|----------|-------|----------|-------|
| 124.9738 | 16.25 | 125.02   | 26.25 |
| 125.0038 | 19.5  | 125.0563 | 20    |
| 125.0375 | 19    | 125.0863 | 21.75 |
| 125.0725 | 15.5  | 125.12   | 21.75 |
| 125.105  | 16    | 125.1575 | 23.5  |
| 125.14   | 17.5  | 125.19   | 17    |
| 125.1713 | 15.25 | 125.2213 | 27    |
| 125.2063 | 15.75 | 125.2513 | 22    |
| 125.2375 | 16.75 | 125.2863 | 19.5  |
| 125.2713 | 14.25 | 125.3225 | 24.25 |
| 125.3075 | 15    | 125.3538 | 26.5  |
| 125.3413 | 15.5  | 125.3875 | 17.5  |
| 125.375  | 15    | 125.42   | 24.75 |
| 125.4063 | 12.5  | 125.4538 | 18.25 |
| 125.44   | 12.5  | 125.4863 | 23.75 |
| 125.4738 | 15.25 | 125.5188 | 19.75 |
| 125.5038 | 19.75 | 125.5563 | 24.5  |
| 125.5413 | 17.75 | 125.5863 | 23.5  |
| 125.5725 | 14.25 | 125.62   | 23.75 |
| 125.605  | 16.75 | 125.6575 | 25.25 |
| 125.6425 | 13.5  | 125.69   | 20.5  |
| 125.6713 | 19    | 125.7213 | 19.25 |
| 125.7063 | 17.25 | 125.7513 | 21.75 |
| 125.7375 | 18.25 | 125.7875 | 23.25 |
| 125.7713 | 16.75 | 125.8225 | 22    |
| 125.8075 | 11.75 | 125.8538 | 19.5  |
| 125.8413 | 16    | 125.8875 | 22.75 |
| 125.875  | 16    | 125.92   | 20    |
| 125.9063 | 15.25 | 125.9538 | 19    |
| 125.94   | 14.75 | 125.9863 | 18.75 |
| 125.9738 | 16    | 126.0188 | 19.75 |
| 126.0038 | 14.75 | 126.055  | 19    |
| 126.0413 | 16.5  | 126.0863 | 17    |
| 126.0725 | 16.5  | 126.1175 | 18    |
| 126.105  | 13.5  | 126.1575 | 17.75 |
| 126.14   | 17.25 | 126.19   | 20.25 |
| 126.1713 | 14.25 | 126.2213 | 17.75 |
| 126.2063 | 15.5  | 126.2513 | 16.25 |
| 126.2375 | 18    | 126.2863 | 17    |
| 126.2713 | 15.5  | 126.3225 | 19    |
| 126.3075 | 16    | 126.3538 | 16    |
| 126.3413 | 15.25 | 126.3875 | 18.5  |
| 126.375  | 10.75 | 126.42   | 17.5  |
| 126.4063 | 12    | 126.4538 | 23.75 |
| 126.44   | 20.25 | 126.4863 | 18.75 |
| 126.4738 | 16.5  | 126.5188 | 20    |
| 126.5038 | 14.25 | 126.555  | 20.25 |
| 126.5413 | 21.5  | 126.5863 | 19    |
| 126.5725 | 16    | 126.6175 | 19.25 |
| 126.605  | 16.25 | 126.6575 | 20.75 |

|          |       |
|----------|-------|
| 126.64   | 16.25 |
| 126.6713 | 21.25 |
| 126.7063 | 15.5  |
| 126.7375 | 15    |
| 126.7713 | 14.25 |
| 126.8075 | 14    |
| 126.8413 | 16.25 |
| 126.875  | 14    |
| 126.9063 | 15.75 |
| 126.94   | 16.75 |
| 126.9738 | 20.5  |
| 127.0038 | 19    |
| 127.0438 | 22.25 |
| 127.075  | 17.5  |
| 127.1063 | 19.25 |
| 127.1413 | 16.75 |
| 127.1725 | 15.5  |
| 127.2088 | 16.5  |
| 127.24   | 17.5  |
| 127.275  | 19.25 |
| 127.3088 | 19.75 |
| 127.3438 | 21    |
| 127.3775 | 15.75 |
| 127.4088 | 17.5  |
| 127.4413 | 17.75 |
| 127.475  | 19.5  |
| 127.505  | 16    |
| 127.5438 | 14.75 |
| 127.575  | 19.25 |
| 127.6063 | 19.5  |
| 127.6413 | 17.25 |
| 127.6738 | 17.5  |
| 127.7088 | 19.25 |
| 127.74   | 16    |
| 127.7738 | 16.75 |
| 127.8088 | 21.75 |
| 127.8438 | 19.25 |
| 127.8775 | 21.25 |
| 127.9088 | 20.5  |
| 127.9413 | 19    |
| 127.975  | 19    |
| 128.0075 | 19    |
| 128.0438 | 17.25 |
| 128.075  | 23.75 |
| 128.1063 | 20.25 |
| 128.1413 | 23.5  |
| 128.1738 | 21.25 |
| 128.2088 | 20.5  |
| 128.24   | 22.5  |
| 128.275  | 23.75 |

|          |       |
|----------|-------|
| 126.69   | 23.25 |
| 126.7213 | 21.25 |
| 126.7513 | 22    |
| 126.7875 | 21.25 |
| 126.8225 | 21.75 |
| 126.8538 | 22.25 |
| 126.8875 | 21.25 |
| 126.92   | 22.5  |
| 126.9538 | 23.75 |
| 126.9863 | 22.75 |
| 127.0188 | 20.25 |
| 127.055  | 19.5  |
| 127.0863 | 19.5  |
| 127.1175 | 23.25 |
| 127.1575 | 21.5  |
| 127.19   | 22.75 |
| 127.2213 | 24.75 |
| 127.2538 | 22.5  |
| 127.2875 | 17.75 |
| 127.3225 | 20.75 |
| 127.355  | 25.75 |
| 127.3888 | 20.25 |
| 127.4238 | 19.5  |
| 127.455  | 21.5  |
| 127.4875 | 18.75 |
| 127.52   | 16.5  |
| 127.5575 | 16.25 |
| 127.5888 | 21.25 |
| 127.62   | 18.25 |
| 127.6575 | 21.75 |
| 127.6925 | 20.75 |
| 127.7238 | 22.75 |
| 127.7538 | 21.75 |
| 127.79   | 22    |
| 127.8238 | 21.5  |
| 127.8588 | 22.75 |
| 127.8888 | 22.5  |
| 127.9238 | 23.75 |
| 127.955  | 24    |
| 127.9875 | 24    |
| 128.02   | 29.25 |
| 128.0575 | 24.5  |
| 128.0888 | 22.25 |
| 128.12   | 21.75 |
| 128.1575 | 24.25 |
| 128.1925 | 23.75 |
| 128.2238 | 25.25 |
| 128.2538 | 26    |
| 128.2875 | 29    |
| 128.3238 | 23    |

|          |       |          |       |
|----------|-------|----------|-------|
| 128.3088 | 18    | 128.355  | 21.25 |
| 128.3438 | 20.5  | 128.3875 | 23.5  |
| 128.3775 | 21.75 | 128.4238 | 24.5  |
| 128.4088 | 18    | 128.455  | 25    |
| 128.4413 | 15.5  | 128.4875 | 24.75 |
| 128.475  | 20.25 | 128.52   | 28    |
| 128.5075 | 20    | 128.5575 | 30    |
| 128.5438 | 18    | 128.5888 | 24.75 |
| 128.575  | 19.25 | 128.62   | 22.25 |
| 128.6063 | 19.75 | 128.6575 | 28.25 |
| 128.6425 | 18.5  | 128.6925 | 23.75 |
| 128.6738 | 16.25 | 128.7238 | 24.75 |
| 128.7088 | 22.5  | 128.7538 | 25.5  |
| 128.74   | 19.5  | 128.79   | 27.5  |
| 128.775  | 21.25 | 128.8213 | 27.5  |
| 128.8088 | 19.5  | 128.855  | 24.75 |
| 128.8438 | 18    | 128.8875 | 26.5  |
| 128.8775 | 18    | 128.9238 | 24.25 |
| 128.9088 | 17.25 | 128.955  | 22.25 |
| 128.9413 | 17    | 128.9875 | 22    |
| 128.975  | 19.75 | 129.0225 | 27    |
| 129.0075 | 14.5  | 129.0575 | 24.5  |
| 129.0438 | 20.25 | 129.0888 | 27.5  |
| 129.075  | 17.5  | 129.12   | 25.75 |
| 129.1063 | 17.5  | 129.1575 | 25.75 |
| 129.1438 | 18.75 | 129.1925 | 26.5  |
| 129.1738 | 15.5  | 129.2238 | 23.25 |
| 129.2088 | 21.25 | 129.2538 | 26.5  |
| 129.24   | 19.5  | 129.2875 | 25.5  |
| 129.275  | 20.25 | 129.3213 | 26.5  |
| 129.3088 | 20.75 | 129.355  | 19.25 |
| 129.3438 | 22.75 | 129.3863 | 20.75 |
| 129.3788 | 18.75 | 129.4238 | 20.75 |
| 129.4088 | 18.75 | 129.455  | 24    |
| 129.4413 | 21.5  | 129.4875 | 23    |
| 129.475  | 19.25 | 129.5225 | 20.5  |
| 129.5075 | 19.25 | 129.5575 | 23    |
| 129.5438 | 17.25 | 129.5888 | 26.5  |
| 129.575  | 16.25 | 129.62   | 26.25 |
| 129.6063 | 18.25 | 129.6575 | 21.25 |
| 129.6413 | 15.25 | 129.6925 | 22.75 |
| 129.6738 | 14.75 | 129.7238 | 21    |
| 129.7088 | 13.75 | 129.7538 | 20.75 |
| 129.7413 | 14    | 129.7875 | 17.75 |
| 129.775  | 16.75 | 129.8213 | 21.5  |
| 129.8088 | 15    | 129.855  | 22    |
| 129.8438 | 12.75 | 129.8863 | 19    |
| 129.8775 | 14.5  | 129.9238 | 17.25 |
| 129.9088 | 15.75 | 129.955  | 22.25 |
| 129.9413 | 13.25 | 129.9875 | 27.5  |

|          |       |          |       |
|----------|-------|----------|-------|
| 129.975  | 12.75 | 130.0238 | 20.75 |
| 130.0075 | 12.25 | 130.0575 | 24.75 |
| 130.0413 | 16.25 | 130.0888 | 24.75 |
| 130.075  | 9.75  | 130.12   | 25.75 |
| 130.1063 | 14    | 130.155  | 23.25 |
| 130.1413 | 18.25 | 130.1925 | 20.5  |
| 130.1725 | 11.25 | 130.2238 | 19    |
| 130.2088 | 17.5  | 130.2538 | 22    |
| 130.2413 | 18.25 | 130.2875 | 19.25 |
| 130.275  | 15.5  | 130.3213 | 22.75 |
| 130.3088 | 16.25 | 130.355  | 17.75 |
| 130.3438 | 15.5  | 130.3863 | 20.25 |
| 130.3775 | 17    | 130.4238 | 21.75 |
| 130.4088 | 16.5  | 130.455  | 24.25 |
| 130.4413 | 15    | 130.4875 | 25    |
| 130.475  | 13.75 | 130.525  | 26.75 |
| 130.51   | 13    | 130.5563 | 22    |
| 130.5413 | 15.5  | 130.5888 | 19.25 |
| 130.575  | 11.5  | 130.62   | 22    |
| 130.6063 | 16.75 | 130.655  | 20.75 |
| 130.6413 | 15.5  | 130.6925 | 25.75 |
| 130.6725 | 15.5  | 130.7238 | 20    |
| 130.7088 | 16.5  | 130.755  | 20.25 |
| 130.7413 | 17.25 | 130.7875 | 25.25 |
| 130.775  | 12.25 | 130.8213 | 21.75 |
| 130.8088 | 12.25 | 130.855  | 18.5  |
| 130.845  | 18    | 130.8863 | 20    |
| 130.8775 | 11.5  | 130.9225 | 21.75 |
| 130.9088 | 13.75 | 130.955  | 19    |
| 130.9413 | 12.5  | 130.9875 | 20    |
| 130.975  | 17    | 131.025  | 25.5  |
| 131.01   | 15    | 131.0563 | 22.5  |
| 131.0413 | 12    | 131.0913 | 23    |
| 131.075  | 13.25 | 131.12   | 21.5  |
| 131.1063 | 15.5  | 131.1563 | 17.25 |
| 131.1413 | 13    | 131.1925 | 18.25 |
| 131.1725 | 12.5  | 131.2238 | 17    |
| 131.2088 | 10.75 | 131.255  | 20.75 |
| 131.2413 | 12.25 | 131.2875 | 18.5  |
| 131.275  | 12.5  | 131.3213 | 20.75 |
| 131.3088 | 10    | 131.355  | 16.75 |
| 131.3438 | 14    | 131.3863 | 16.25 |
| 131.3775 | 12.5  | 131.4213 | 21    |
| 131.4088 | 13    | 131.455  | 12.25 |
| 131.4413 | 14    | 131.4875 | 20.75 |
| 131.4775 | 14    | 131.525  | 20.25 |
| 131.51   | 14.5  | 131.5563 | 21.25 |
| 131.5413 | 18.75 | 131.5875 | 18.75 |
| 131.575  | 17.25 | 131.62   | 22.5  |
| 131.6063 | 12.5  | 131.6563 | 19.75 |

|          |       |          |       |
|----------|-------|----------|-------|
| 131.6413 | 15.25 | 131.6975 | 22    |
| 131.6725 | 13.75 | 131.7238 | 24.75 |
| 131.7088 | 11.25 | 131.755  | 20.25 |
| 131.7413 | 18.5  | 131.7875 | 19.25 |
| 131.775  | 13    | 131.8213 | 22    |
| 131.8075 | 11.25 | 131.855  | 21.75 |
| 131.8438 | 13.5  | 131.8863 | 25.25 |
| 131.8775 | 12.75 | 131.9213 | 21.5  |
| 131.9088 | 14.5  | 131.955  | 16.75 |
| 131.9413 | 14    | 131.9875 | 20    |
| 131.9775 | 15.5  | 132.025  | 20    |
| 132.01   | 12    | 132.0563 | 17.5  |
| 132.0425 | 17    | 132.0875 | 20.25 |
| 132.075  | 18    | 132.12   | 23    |
| 132.1063 | 18.5  | 132.1563 | 20    |
| 132.1413 | 13    | 132.1925 | 21.5  |
| 132.1725 | 14    | 132.2238 | 23.25 |
| 132.2088 | 16.5  | 132.255  | 21.25 |
| 132.2413 | 14.75 | 132.2875 | 21.5  |
| 132.275  | 15    | 132.3213 | 20.75 |
| 132.3075 | 19    | 132.355  | 25.25 |
| 132.345  | 17.25 | 132.3863 | 22.75 |
| 132.3788 | 15.5  | 132.4213 | 18.25 |
| 132.4113 | 13.75 | 132.455  | 20.5  |
| 132.4438 | 14.75 | 132.4875 | 20.25 |
| 132.4788 | 13.5  | 132.525  | 22.25 |
| 132.5113 | 16.5  | 132.5563 | 19.5  |
| 132.5438 | 13    | 132.5875 | 19.75 |
| 132.5775 | 16.25 | 132.62   | 23    |
| 132.61   | 14.5  | 132.6563 | 20.25 |
| 132.6425 | 14    | 132.6925 | 20    |
| 132.6738 | 11.75 | 132.7238 | 23.25 |
| 132.7113 | 12    | 132.755  | 19.5  |
| 132.7463 | 14.75 | 132.7875 | 19    |
| 132.7775 | 14    | 132.8213 | 22.75 |
| 132.81   | 19    | 132.855  | 16.25 |
| 132.845  | 14.75 | 132.8863 | 21.25 |
| 132.8788 | 13.75 | 132.9213 | 20    |
| 132.9113 | 14.5  | 132.955  | 23    |
| 132.9438 | 17.25 | 132.99   | 20.75 |
| 132.9788 | 13.25 | 133.025  | 21    |
| 133.0113 | 17    | 133.0563 | 22.25 |
| 133.0438 | 14.25 | 133.0875 | 21    |
| 133.0775 | 14.25 | 133.12   | 20.5  |
| 133.11   | 11    | 133.1538 | 20.75 |
| 133.1425 | 10.75 | 133.19   | 22.25 |
| 133.1763 | 16.5  | 133.2238 | 22.75 |
| 133.2138 | 14.75 | 133.255  | 22    |
| 133.2475 | 11.75 | 133.2875 | 24.25 |
| 133.2788 | 18.75 | 133.3188 | 20.75 |



|          |       |
|----------|-------|
| 133.3138 | 9.5   |
| 133.3463 | 12.25 |
| 133.38   | 11.75 |
| 133.4125 | 12    |
| 133.445  | 14    |
| 133.4813 | 12    |
| 133.5138 | 13.75 |
| 133.5463 | 10.25 |
| 133.58   | 14.5  |
| 133.6125 | 14.75 |
| 133.645  | 15.75 |
| 133.6763 | 11.25 |
| 133.715  | 13.75 |
| 133.7475 | 12    |
| 133.7788 | 11.5  |
| 133.8138 | 11.5  |
| 133.8463 | 12.5  |
| 133.88   | 13.75 |
| 133.9125 | 11.5  |
| 133.945  | 15    |
| 133.9813 | 13.5  |
| 134.0138 | 10    |
| 134.0463 | 16    |
| 134.08   | 11.75 |
| 134.1125 | 12    |
| 134.145  | 15    |
| 134.1763 | 13.5  |
| 134.215  | 13.5  |
| 134.2475 | 12.75 |
| 134.2788 | 11    |
| 134.3113 | 13.75 |
| 134.3463 | 13.5  |
| 134.38   | 11    |
| 134.4125 | 9     |
| 134.4463 | 12    |
| 134.4813 | 11    |
| 134.5138 | 9.75  |
| 134.545  | 13.75 |
| 134.58   | 11.5  |
| 134.6113 | 9     |
| 134.645  | 12.25 |
| 134.6763 | 10    |
| 134.715  | 12    |
| 134.7475 | 9.75  |
| 134.7788 | 12    |
| 134.8113 | 12.25 |
| 134.8475 | 15.5  |
| 134.8813 | 12.25 |
| 134.9138 | 14    |
| 134.95   | 10    |

|          |       |
|----------|-------|
| 133.3575 | 25    |
| 133.3875 | 18    |
| 133.4238 | 20.5  |
| 133.4575 | 24    |
| 133.4913 | 19    |
| 133.5263 | 19.25 |
| 133.5575 | 22.5  |
| 133.5888 | 23.75 |
| 133.6225 | 22.5  |
| 133.6575 | 25.5  |
| 133.6888 | 27    |
| 133.7263 | 26.75 |
| 133.7575 | 26    |
| 133.79   | 24.5  |
| 133.8213 | 27.5  |
| 133.8575 | 25    |
| 133.8875 | 24.25 |
| 133.9238 | 27    |
| 133.9575 | 23    |
| 133.9913 | 29.25 |
| 134.0263 | 23.75 |
| 134.0575 | 29.25 |
| 134.0888 | 24.25 |
| 134.1225 | 21.75 |
| 134.1575 | 24.75 |
| 134.1888 | 21.25 |
| 134.2263 | 20.5  |
| 134.2575 | 27.75 |
| 134.29   | 26.75 |
| 134.3213 | 25.5  |
| 134.3575 | 28.75 |
| 134.3875 | 28.25 |
| 134.4238 | 30.25 |
| 134.455  | 22.5  |
| 134.4913 | 26    |
| 134.5263 | 26    |
| 134.5575 | 26.75 |
| 134.5888 | 26.75 |
| 134.6225 | 28.25 |
| 134.6575 | 26.5  |
| 134.6888 | 26.75 |
| 134.7263 | 23.5  |
| 134.7575 | 32.75 |
| 134.79   | 27.25 |
| 134.8213 | 27.5  |
| 134.8575 | 31    |
| 134.8875 | 32.25 |
| 134.9238 | 23.75 |
| 134.955  | 30.75 |
| 134.9913 | 28    |

|          |       |          |       |
|----------|-------|----------|-------|
| 134.9838 | 11.5  | 135.0263 | 31.25 |
| 135.015  | 9.5   | 135.0575 | 30    |
| 135.0463 | 11.25 | 135.0913 | 26.5  |
| 135.0825 | 9.25  | 135.1225 | 24    |
| 135.1138 | 10.25 | 135.1575 | 28.5  |
| 135.1475 | 12.5  | 135.1888 | 21.25 |
| 135.1788 | 10.25 | 135.2263 | 26.5  |
| 135.2175 | 8     | 135.2575 | 28.25 |
| 135.25   | 8.75  | 135.29   | 26.75 |
| 135.2813 | 9.75  | 135.3213 | 29.75 |
| 135.3138 | 9.5   | 135.3575 | 27    |
| 135.3475 | 9.75  | 135.3875 | 27    |
| 135.3813 | 9.25  | 135.4238 | 25.75 |
| 135.4138 | 13    | 135.4538 | 25    |
| 135.45   | 14.75 | 135.4913 | 23.25 |
| 135.4838 | 17.75 | 135.5263 | 26.75 |
| 135.515  | 12.75 | 135.5575 | 22.25 |
| 135.5463 | 13.75 | 135.5875 | 26.5  |
| 135.5825 | 10.25 | 135.6225 | 27    |
| 135.6138 | 17.5  | 135.6575 | 22.75 |
| 135.6475 | 12.75 | 135.6888 | 23.75 |
| 135.6813 | 14.75 | 135.725  | 19.5  |
| 135.7175 | 13.25 | 135.7575 | 22.25 |
| 135.75   | 13    | 135.79   | 15.75 |
| 135.7813 | 15    | 135.8213 | 24    |
| 135.8138 | 11.5  | 135.855  | 21.25 |
| 135.8475 | 12.25 | 135.89   | 20.75 |
| 135.8813 | 15.5  | 135.9238 | 17.5  |
| 135.9138 | 13    | 135.9538 | 19.75 |
| 135.9475 | 12    | 135.9913 | 22    |
| 135.9838 | 10.5  | 136.0263 | 17    |
| 136.015  | 12.25 | 136.06   | 18.5  |
| 136.0463 | 13.75 | 136.0875 | 23    |
| 136.0825 | 14.75 | 136.1225 | 16.5  |
| 136.115  | 8.5   | 136.1563 | 21.5  |
| 136.1475 | 13.25 | 136.1888 | 24.25 |
| 136.1813 | 14.25 | 136.2263 | 23.5  |
| 136.2175 | 16    | 136.2588 | 21    |
| 136.25   | 15.5  | 136.29   | 20.5  |
| 136.2813 | 11.5  | 136.3213 | 24.5  |
| 136.3138 | 12    | 136.355  | 20.75 |
| 136.3475 | 13.75 | 136.39   | 25.5  |
| 136.3813 | 10.25 | 136.4238 | 19.25 |
| 136.4138 | 15.25 | 136.4538 | 25    |
| 136.45   | 11.75 | 136.4913 | 20.75 |
| 136.4838 | 9     | 136.5263 | 26.25 |
| 136.515  | 12.25 | 136.5575 | 28    |
| 136.5463 | 13    | 136.5875 | 21.5  |
| 136.5825 | 14.75 | 136.6225 | 21.5  |
| 136.6138 | 14.5  | 136.6563 | 18.5  |

|          |       |          |       |
|----------|-------|----------|-------|
| 136.6475 | 10.25 | 136.6888 | 19.5  |
| 136.6813 | 13.25 | 136.725  | 17.25 |
| 136.7175 | 12.75 | 136.7588 | 16.25 |
| 136.75   | 15.5  | 136.79   | 20.25 |
| 136.7813 | 14.75 | 136.8213 | 21.75 |
| 136.8138 | 11    | 136.855  | 18.5  |
| 136.8475 | 12.5  | 136.89   | 20.75 |
| 136.8813 | 14    | 136.9238 | 21.75 |
| 136.9138 | 10.5  | 136.9538 | 18.25 |
| 136.9475 | 12.75 | 136.9888 | 21.75 |
| 136.9838 | 12    | 137.0263 | 18.5  |
| 137.015  | 14.5  | 137.0575 | 18.75 |
| 137.0463 | 12.75 | 137.0875 | 18    |
| 137.0825 | 9.5   | 137.1225 | 22.75 |
| 137.1138 | 12.75 | 137.1563 | 19.5  |
| 137.145  | 8.75  | 137.1888 | 20.25 |
| 137.1813 | 13    | 137.225  | 20.5  |
| 137.22   | 9     | 137.2588 | 21.75 |
| 137.25   | 14.75 | 137.29   | 20    |
| 137.2813 | 8.25  | 137.3213 | 25.25 |
| 137.3138 | 10.5  | 137.3525 | 22.75 |
| 137.3475 | 10    | 137.39   | 21.75 |
| 137.3813 | 13    | 137.4238 | 29    |
| 137.4163 | 12.75 | 137.4538 | 22.25 |
| 137.4475 | 12    | 137.4888 | 22.5  |
| 137.4838 | 14.75 | 137.5263 | 17.5  |
| 137.515  | 12.5  | 137.5575 | 24.75 |
| 137.5463 | 13.75 | 137.5888 | 19.25 |
| 137.58   | 15.75 | 137.6225 | 19.25 |
| 137.6138 | 17.25 | 137.6563 | 21.5  |
| 137.645  | 16    | 137.6888 | 22.25 |
| 137.6813 | 13.25 | 137.7238 | 21.25 |
| 137.7213 | 14    | 137.7588 | 21    |
| 137.75   | 14    | 137.79   | 18.25 |
| 137.7813 | 11.5  | 137.8238 | 20.75 |
| 137.8163 | 16.5  | 137.8525 | 24.75 |
| 137.8475 | 13.75 | 137.8913 | 18    |
| 137.8813 | 15.25 | 137.9238 | 23    |
| 137.9163 | 16.25 | 137.9538 | 19.25 |
| 137.9475 | 10.75 | 137.9888 | 24.75 |
| 137.9838 | 12    | 138.0263 | 21    |
| 138.015  | 14.5  | 138.0575 | 21.75 |
| 138.0463 | 12.5  | 138.0875 | 18.75 |
| 138.08   | 14    | 138.1225 | 22    |
| 138.1138 | 12.25 | 138.1563 | 20.75 |
| 138.145  | 13.75 | 138.1888 | 20    |
| 138.1813 | 13.75 | 138.2238 | 21.75 |
| 138.22   | 11.5  | 138.2575 | 19.5  |
| 138.25   | 14.75 | 138.29   | 19.75 |
| 138.2813 | 16.75 | 138.3213 | 17.5  |

|          |       |
|----------|-------|
| 138.3138 | 14    |
| 138.3475 | 10.25 |
| 138.3813 | 11.75 |
| 138.4163 | 11.25 |
| 138.4475 | 14.5  |
| 138.4838 | 11.25 |
| 138.515  | 16.25 |
| 138.5463 | 15.5  |
| 138.58   | 14.25 |
| 138.6138 | 12.25 |
| 138.6463 | 15    |
| 138.6813 | 14.5  |
| 138.72   | 13.5  |
| 138.75   | 16.5  |
| 138.7813 | 12.75 |
| 138.8138 | 18.25 |
| 138.8475 | 17    |
| 138.8813 | 12.5  |
| 138.9163 | 13.25 |
| 138.9488 | 14.25 |
| 138.985  | 12    |
| 139.015  | 15.25 |
| 139.0463 | 19.5  |
| 139.08   | 37.75 |
| 139.1138 | 15    |
| 139.1463 | 36.5  |
| 139.1825 | 14.75 |
| 139.2175 | 34.25 |
| 139.25   | 14.75 |
| 139.2813 | 14.75 |
| 139.3138 | 20.25 |
| 139.3475 | 28.5  |
| 139.3813 | 20    |
| 139.4163 | 19.5  |
| 139.4488 | 13.25 |
| 139.4838 | 13.75 |
| 139.5175 | 15.75 |
| 139.5463 | 23.25 |
| 139.58   | 16.25 |
| 139.6138 | 17    |
| 139.6463 | 16.5  |
| 139.6838 | 12.25 |
| 139.7175 | 11.75 |
| 139.75   | 17.75 |
| 139.7813 | 18    |
| 139.8138 | 21    |
| 139.8475 | 18    |
| 139.8813 | 14    |
| 139.9163 | 16    |
| 139.9488 | 13.5  |

|          |       |
|----------|-------|
| 138.3525 | 19.25 |
| 138.39   | 18.75 |
| 138.4238 | 22.75 |
| 138.4538 | 21.25 |
| 138.4888 | 22    |
| 138.5263 | 23.75 |
| 138.5575 | 23.75 |
| 138.5875 | 24.25 |
| 138.6225 | 23.25 |
| 138.6563 | 19    |
| 138.6888 | 22.5  |
| 138.7238 | 19.25 |
| 138.7575 | 17.75 |
| 138.79   | 18.25 |
| 138.8213 | 18.75 |
| 138.8525 | 19.25 |
| 138.89   | 17    |
| 138.9213 | 19    |
| 138.9538 | 20    |
| 138.9888 | 13.5  |
| 139.0263 | 20.25 |
| 139.0575 | 18.75 |
| 139.0875 | 25.75 |
| 139.1225 | 15.75 |
| 139.1563 | 16.75 |
| 139.1888 | 22.25 |
| 139.2238 | 18.75 |
| 139.2575 | 19.75 |
| 139.29   | 19    |
| 139.3213 | 19    |
| 139.3525 | 20.25 |
| 139.39   | 22.5  |
| 139.4213 | 19.25 |
| 139.4538 | 21.25 |
| 139.4913 | 21.5  |
| 139.5238 | 23    |
| 139.5575 | 26    |
| 139.5875 | 26.25 |
| 139.62   | 25.25 |
| 139.6563 | 24.5  |
| 139.6888 | 22    |
| 139.7238 | 24.25 |
| 139.7575 | 20.5  |
| 139.79   | 21.75 |
| 139.8213 | 24    |
| 139.8525 | 18.25 |
| 139.89   | 19.5  |
| 139.9213 | 19.75 |
| 139.9538 | 18.75 |
| 139.99   | 19    |

|          |       |
|----------|-------|
| 139.9838 | 14.5  |
| 140.015  | 20    |
| 140.0463 | 16.5  |
| 140.08   | 10.5  |
| 140.1138 | 12.75 |
| 140.1463 | 12.25 |
| 140.1838 | 9.25  |
| 140.2175 | 13    |
| 140.25   | 12.25 |
| 140.2813 | 12.25 |
| 140.3113 | 13.5  |
| 140.3475 | 13.75 |
| 140.3838 | 12.5  |
| 140.4163 | 11.5  |
| 140.4488 | 13.75 |
| 140.4838 | 16.25 |
| 140.515  | 15.75 |
| 140.5463 | 14    |
| 140.58   | 12.5  |
| 140.6138 | 14    |
| 140.6463 | 13.75 |
| 140.6863 | 11.25 |
| 140.7175 | 12.75 |
| 140.75   | 12    |
| 140.7813 | 14.25 |
| 140.8113 | 9.5   |
| 140.8463 | 10    |
| 140.8813 | 11.25 |
| 140.9163 | 10    |
| 140.9488 | 12.75 |
| 140.9863 | 12.25 |
| 141.015  | 11    |
| 141.0463 | 13.75 |
| 141.08   | 11.75 |
| 141.1138 | 11.25 |
| 141.1463 | 9.75  |
| 141.1863 | 9.5   |
| 141.2175 | 13.75 |
| 141.25   | 12.25 |
| 141.2813 | 11    |
| 141.3113 | 9.25  |
| 141.3463 | 11    |
| 141.3813 | 12.25 |
| 141.4138 | 15    |
| 141.4488 | 17    |
| 141.4838 | 14.5  |
| 141.515  | 12.5  |
| 141.5463 | 10.5  |
| 141.58   | 15.25 |
| 141.6138 | 11.5  |

|          |       |
|----------|-------|
| 140.0238 | 21    |
| 140.0575 | 22.5  |
| 140.0875 | 23.75 |
| 140.12   | 19.75 |
| 140.1563 | 19.75 |
| 140.1888 | 19.25 |
| 140.2238 | 17.25 |
| 140.2575 | 17.25 |
| 140.29   | 19.5  |
| 140.3213 | 21.5  |
| 140.3525 | 19.5  |
| 140.39   | 24.25 |
| 140.4213 | 21.5  |
| 140.4538 | 21    |
| 140.49   | 18.5  |
| 140.5238 | 21    |
| 140.5575 | 23.75 |
| 140.5875 | 17.75 |
| 140.62   | 27.25 |
| 140.6575 | 21.25 |
| 140.6888 | 22    |
| 140.7238 | 20    |
| 140.7575 | 18.25 |
| 140.7888 | 18.75 |
| 140.8213 | 20    |
| 140.8525 | 18.75 |
| 140.8913 | 18.25 |
| 140.9213 | 20.25 |
| 140.9538 | 16.75 |
| 140.99   | 16.75 |
| 141.0238 | 19.5  |
| 141.0575 | 19.25 |
| 141.0875 | 17.5  |
| 141.12   | 24    |
| 141.1563 | 21.25 |
| 141.1875 | 21    |
| 141.2238 | 19.75 |
| 141.2575 | 21.5  |
| 141.2888 | 21    |
| 141.3225 | 21.25 |
| 141.3525 | 24.25 |
| 141.3888 | 25    |
| 141.4213 | 23.25 |
| 141.4538 | 28.75 |
| 141.49   | 24    |
| 141.5238 | 25.25 |
| 141.555  | 22.25 |
| 141.5875 | 21.25 |
| 141.6213 | 16.25 |
| 141.6563 | 25.25 |

|          |       |          |       |
|----------|-------|----------|-------|
| 141.6463 | 10.5  | 141.6875 | 23.25 |
| 141.6863 | 10.25 | 141.7238 | 21.75 |
| 141.7175 | 12.25 | 141.7575 | 19.5  |
| 141.75   | 13.75 | 141.7888 | 23.5  |
| 141.7813 | 9.75  | 141.8213 | 23.5  |
| 141.8113 | 12    | 141.8525 | 20    |
| 141.8475 | 8.75  | 141.8888 | 21.25 |
| 141.8813 | 12.25 | 141.9213 | 22.5  |
| 141.9138 | 11.5  | 141.9538 | 22.5  |
| 141.9488 | 10    | 141.99   | 25.75 |
| 141.9825 | 10.75 | 142.0238 | 21.25 |
| 142.015  | 12.75 | 142.055  | 27.25 |
| 142.0463 | 10.75 | 142.0875 | 27.5  |
| 142.08   | 10.5  | 142.1213 | 21.25 |
| 142.115  | 11.5  | 142.1563 | 22.75 |
| 142.1463 | 11.25 | 142.1875 | 22.25 |
| 142.1863 | 10    | 142.2238 | 24.25 |
| 142.2175 | 13    | 142.2575 | 18.25 |
| 142.25   | 10.25 | 142.2888 | 21.75 |
| 142.2813 | 8.75  | 142.3213 | 24.5  |
| 142.3113 | 11.75 | 142.3525 | 26    |
| 142.3463 | 12.5  | 142.3888 | 23.5  |
| 142.3825 | 15    | 142.4213 | 29    |
| 142.4175 | 9.75  | 142.4538 | 22    |
| 142.4513 | 12.25 | 142.49   | 25.25 |
| 142.485  | 8.75  | 142.5238 | 21.75 |
| 142.5175 | 9.75  | 142.555  | 25.5  |
| 142.5488 | 11.5  | 142.5875 | 24.25 |
| 142.5838 | 8     | 142.6238 | 23.75 |
| 142.62   | 10    | 142.6588 | 27.75 |
| 142.6525 | 10    | 142.6938 | 24.5  |
| 142.6888 | 10.25 | 142.7275 | 21.25 |
| 142.72   | 9.75  | 142.7575 | 21.25 |
| 142.7538 | 10    | 142.7913 | 23    |
| 142.7888 | 10.25 | 142.8238 | 24.5  |
| 142.8163 | 8.75  | 142.8538 | 25.75 |
| 142.85   | 9.25  | 142.89   | 19    |
| 142.8838 | 11.75 | 142.9225 | 19.75 |
| 142.92   | 12.75 | 142.955  | 17.25 |
| 142.9538 | 8.5   | 142.9913 | 18.5  |
| 142.9875 | 11.75 | 143.025  | 20.25 |
| 143.0188 | 15    | 143.0563 | 16.5  |
| 143.0488 | 10.5  | 143.09   | 20.75 |
| 143.0838 | 14.25 | 143.1238 | 20    |
| 143.1175 | 14    | 143.1563 | 23.25 |
| 143.1525 | 13.25 | 143.19   | 16.5  |
| 143.1888 | 11.75 | 143.2275 | 18.25 |
| 143.22   | 10.25 | 143.2575 | 23    |
| 143.2538 | 12.75 | 143.2913 | 22    |
| 143.2863 | 9     | 143.3213 | 22.5  |

|          |       |          |       |
|----------|-------|----------|-------|
| 143.3163 | 7.5   | 143.3538 | 24.25 |
| 143.35   | 12.5  | 143.39   | 23.25 |
| 143.3838 | 8.5   | 143.4225 | 22.75 |
| 143.42   | 7.25  | 143.455  | 19.75 |
| 143.4538 | 7.25  | 143.4913 | 22.25 |
| 143.4875 | 7.75  | 143.525  | 18.75 |
| 143.5188 | 8.5   | 143.5563 | 22    |
| 143.5488 | 9.25  | 143.59   | 20    |
| 143.5838 | 8     | 143.6238 | 25    |
| 143.6175 | 8.5   | 143.6563 | 19.75 |
| 143.655  | 9.75  | 143.69   | 23.75 |
| 143.6888 | 9.75  | 143.7275 | 20.25 |
| 143.7213 | 6.5   | 143.76   | 21    |
| 143.7538 | 11    | 143.7938 | 23    |
| 143.7863 | 13.5  | 143.8238 | 20    |
| 143.8163 | 10    | 143.8563 | 18.25 |
| 143.8525 | 15    | 143.8925 | 22    |
| 143.8888 | 10    | 143.9238 | 17.5  |
| 143.9213 | 12.5  | 143.9563 | 20.25 |
| 143.9538 | 11.75 | 143.9925 | 20.75 |
| 143.9875 | 8.75  | 144.0263 | 21.5  |
| 144.0188 | 7.5   | 144.0575 | 19.25 |
| 144.0488 | 9.75  | 144.09   | 18.75 |
| 144.0838 | 10.25 | 144.125  | 17.25 |
| 144.1175 | 11.25 | 144.1588 | 19.25 |
| 144.1525 | 11.25 | 144.1925 | 16.25 |
| 144.1888 | 11    | 144.23   | 17    |
| 144.22   | 11    | 144.2625 | 18    |
| 144.2513 | 8.75  | 144.2938 | 15    |
| 144.2863 | 13.75 | 144.3238 | 17.5  |
| 144.3163 | 11.25 | 144.3563 | 18.75 |
| 144.3525 | 9.75  | 144.3925 | 20    |
| 144.3888 | 10    | 144.4238 | 16.75 |
| 144.4213 | 7.75  | 144.4563 | 19.5  |
| 144.4538 | 7.25  | 144.4925 | 21.75 |
| 144.4875 | 10    | 144.5263 | 25.25 |
| 144.5188 | 11.25 | 144.5575 | 23.5  |
| 144.5488 | 8.75  | 144.59   | 20.75 |
| 144.5838 | 10.75 | 144.625  | 24.25 |
| 144.6175 | 10.5  | 144.6588 | 24.25 |
| 144.6525 | 13.5  | 144.6925 | 21.25 |
| 144.6888 | 12    | 144.73   | 24.25 |
| 144.72   | 12.5  | 144.7625 | 20.75 |
| 144.7513 | 13    | 144.7938 | 18    |
| 144.7863 | 9     | 144.8238 | 20    |
| 144.8163 | 11    | 144.8563 | 21.75 |
| 144.8525 | 11.5  | 144.8925 | 24    |
| 144.8888 | 14.25 | 144.9238 | 19.5  |
| 144.9213 | 11.5  | 144.9563 | 21.25 |
| 144.9538 | 11    | 144.9925 | 24.75 |

|          |       |          |       |
|----------|-------|----------|-------|
| 144.9875 | 12.75 | 145.0263 | 24    |
| 145.0188 | 9.75  | 145.0575 | 22.5  |
| 145.0488 | 13.5  | 145.09   | 22.75 |
| 145.0813 | 12    | 145.125  | 21    |
| 145.1175 | 8.25  | 145.1588 | 20.25 |
| 145.1525 | 10.5  | 145.1925 | 19    |
| 145.1888 | 12.75 | 145.2275 | 14.75 |
| 145.22   | 13.25 | 145.2625 | 23.25 |
| 145.2525 | 13    | 145.2938 | 16.5  |
| 145.2863 | 12.25 | 145.3238 | 16.5  |
| 145.3163 | 13.75 | 145.3563 | 21.25 |
| 145.3525 | 11    | 145.3925 | 19    |
| 145.3875 | 10.5  | 145.4225 | 18.25 |
| 145.4213 | 9.5   | 145.4588 | 19.5  |
| 145.455  | 11    | 145.4925 | 19.25 |
| 145.4875 | 9.25  | 145.5263 | 18.25 |
| 145.5188 | 11    | 145.5575 | 19.5  |
| 145.5488 | 9     | 145.59   | 25.25 |
| 145.5825 | 11.5  | 145.6275 | 23    |
| 145.6175 | 13.75 | 145.6613 | 32    |
| 145.6525 | 13    | 145.6938 | 15.75 |
| 145.6888 | 13.25 | 145.73   | 14.75 |
| 145.72   | 12.5  | 145.765  | 21    |
| 145.7513 | 15    | 145.7963 | 23.5  |
| 145.7888 | 14    | 145.8263 | 24.75 |
| 145.8163 | 15.25 | 145.8563 | 21.5  |
| 145.8525 | 13.25 | 145.8938 | 20.75 |
| 145.8875 | 13.75 | 145.9263 | 25.25 |
| 145.9213 | 13    | 145.9613 | 25.75 |
| 145.9538 | 15.25 | 145.9938 | 25.5  |
| 145.9875 | 12.5  | 146.0275 | 20.75 |
| 146.0188 | 10.5  | 146.0588 | 19.75 |
| 146.0488 | 11.5  | 146.0913 | 27    |
| 146.0825 | 13.5  | 146.1275 | 27    |
| 146.1188 | 16    | 146.1613 | 25.5  |
| 146.1525 | 12.75 | 146.1938 | 30.5  |
| 146.1888 | 17.25 | 146.23   | 25.75 |
| 146.22   | 15    | 146.2625 | 25.25 |
| 146.2513 | 14.75 | 146.2963 | 27.5  |
| 146.2863 | 13    | 146.3263 | 29.75 |
| 146.3163 | 12.75 | 146.3563 | 32.25 |
| 146.3525 | 10.5  | 146.3938 | 29    |
| 146.3875 | 10.25 | 146.4263 | 27    |
| 146.4213 | 11    | 146.4613 | 28.5  |
| 146.4538 | 14.25 | 146.4938 | 24.75 |
| 146.4875 | 11.75 | 146.5275 | 27.75 |
| 146.5188 | 10.25 | 146.5588 | 22.5  |
| 146.5488 | 12.75 | 146.5913 | 24.25 |
| 146.5825 | 11.5  | 146.6275 | 24    |
| 146.6188 | 13    | 146.6613 | 27    |



|          |       |          |       |
|----------|-------|----------|-------|
| 146.6525 | 13    | 146.6938 | 25.25 |
| 146.6888 | 12.75 | 146.73   | 25.75 |
| 146.72   | 12.25 | 146.7625 | 31    |
| 146.7513 | 13    | 146.7963 | 31.5  |
| 146.7863 | 11.25 | 146.8263 | 32    |
| 146.8163 | 13    | 146.8563 | 31.25 |
| 146.8525 | 10.25 | 146.8938 | 29    |
| 146.8875 | 10.5  | 146.9263 | 26    |
| 146.9213 | 10.25 | 146.9613 | 27    |
| 146.9538 | 12.5  | 146.9925 | 31.75 |
| 146.9875 | 10.5  | 147.0275 | 25.25 |
| 147.0175 | 14.5  | 147.0588 | 24.25 |
| 147.0488 | 12.25 | 147.0913 | 25    |
| 147.0825 | 12.25 | 147.125  | 22.25 |
| 147.1188 | 14.5  | 147.1613 | 26.25 |
| 147.1525 | 12.25 | 147.1938 | 27.5  |
| 147.1888 | 13    | 147.23   | 19.25 |
| 147.22   | 10.5  | 147.2625 | 26.5  |
| 147.2513 | 12.5  | 147.2963 | 21.75 |
| 147.2863 | 13    | 147.3263 | 22.5  |
| 147.3188 | 13    | 147.3563 | 19.25 |
| 147.3513 | 13.25 | 147.3938 | 20.75 |
| 147.3875 | 13.75 | 147.4263 | 19    |
| 147.4213 | 10    | 147.4613 | 25    |
| 147.4538 | 14.5  | 147.4925 | 19.25 |
| 147.4875 | 12.5  | 147.5275 | 22.25 |
| 147.5175 | 11.5  | 147.5588 | 18.25 |
| 147.5488 | 14.75 | 147.5913 | 19.75 |
| 147.5825 | 14.25 | 147.625  | 23.25 |
| 147.6188 | 16.75 | 147.6613 | 20.5  |
| 147.65   | 13.25 | 147.6938 | 19.5  |
| 147.6888 | 14    | 147.73   | 22    |
| 147.72   | 11.5  | 147.7625 | 15.25 |
| 147.7513 | 13.75 | 147.7963 | 19.25 |
| 147.7863 | 12.5  | 147.8263 | 22    |
| 147.8188 | 10    | 147.8563 | 21    |
| 147.8513 | 12.75 | 147.8938 | 15.75 |
| 147.8875 | 12.25 | 147.9263 | 16.25 |
| 147.9213 | 10.25 | 147.9613 | 23.5  |
| 147.9538 | 14.5  | 147.9925 | 25.75 |
| 147.9875 | 11.25 | 148.0275 | 18    |
| 148.0175 | 8.75  | 148.0588 | 19    |
| 148.0488 | 12.5  | 148.0913 | 20    |
| 148.0825 | 11    | 148.125  | 17.5  |
| 148.1188 | 11    | 148.1613 | 20.5  |
| 148.15   | 14.25 | 148.1938 | 18    |
| 148.1875 | 12.25 | 148.23   | 18.25 |
| 148.22   | 15    | 148.2625 | 19.75 |
| 148.2513 | 12.25 | 148.2963 | 19.75 |
| 148.2863 | 10    | 148.3263 | 18.5  |

|          |       |
|----------|-------|
| 148.3188 | 14    |
| 148.3513 | 12.5  |
| 148.3875 | 11.25 |
| 148.4213 | 11.5  |
| 148.4538 | 12.5  |
| 148.4875 | 13.5  |
| 148.5175 | 10.25 |
| 148.5488 | 12.5  |
| 148.5825 | 10.75 |
| 148.6188 | 13    |
| 148.65   | 9     |
| 148.6875 | 11.25 |
| 148.72   | 13.25 |
| 148.7513 | 12.5  |
| 148.7863 | 12.5  |
| 148.8213 | 17.5  |
| 148.8525 | 13.25 |
| 148.8888 | 13    |
| 148.9238 | 15.25 |
| 148.9563 | 9.5   |
| 148.9888 | 13.25 |
| 149.0188 | 13.25 |
| 149.0525 | 15.75 |
| 149.085  | 12.5  |
| 149.1213 | 14.25 |
| 149.1538 | 12.75 |
| 149.1888 | 11.75 |
| 149.2225 | 12.5  |
| 149.2538 | 12.5  |
| 149.2888 | 12.75 |
| 149.3213 | 10.5  |
| 149.355  | 13.75 |
| 149.3888 | 12.75 |
| 149.4238 | 11    |
| 149.4563 | 8.75  |
| 149.4888 | 11.75 |
| 149.5188 | 12.5  |
| 149.5525 | 11.5  |
| 149.585  | 13.5  |
| 149.6213 | 13    |
| 149.6538 | 9.5   |
| 149.6888 | 10.75 |
| 149.7225 | 14.5  |
| 149.7538 | 12.5  |
| 149.7863 | 10.5  |
| 149.8213 | 13.5  |
| 149.855  | 13.75 |
| 149.8888 | 11.75 |
| 149.9238 | 9.5   |
| 149.9563 | 12.25 |

|          |       |
|----------|-------|
| 148.3563 | 19.5  |
| 148.3938 | 19.75 |
| 148.4238 | 13.5  |
| 148.4613 | 15    |
| 148.4925 | 19    |
| 148.5275 | 21.25 |
| 148.5588 | 18.75 |
| 148.5913 | 17.75 |
| 148.625  | 17.75 |
| 148.6613 | 21.5  |
| 148.6988 | 19.5  |
| 148.73   | 16.75 |
| 148.76   | 18.25 |
| 148.7963 | 18    |
| 148.8263 | 18.75 |
| 148.8563 | 16    |
| 148.8913 | 21.75 |
| 148.9238 | 20    |
| 148.9613 | 20.25 |
| 148.9925 | 19.75 |
| 149.0275 | 22.5  |
| 149.0588 | 20.75 |
| 149.0913 | 20.5  |
| 149.125  | 19.25 |
| 149.1613 | 22.5  |
| 149.195  | 22.75 |
| 149.23   | 17    |
| 149.26   | 28.5  |
| 149.2963 | 23.5  |
| 149.3263 | 18.75 |
| 149.3563 | 21    |
| 149.3913 | 24.25 |
| 149.4238 | 20.25 |
| 149.4613 | 22    |
| 149.4925 | 20.5  |
| 149.5275 | 22    |
| 149.5588 | 21    |
| 149.5913 | 22.75 |
| 149.625  | 22    |
| 149.6613 | 21    |
| 149.695  | 17.25 |
| 149.73   | 18.75 |
| 149.76   | 18.5  |
| 149.7963 | 21.5  |
| 149.8263 | 19.75 |
| 149.8563 | 22    |
| 149.8913 | 19.25 |
| 149.9238 | 23    |
| 149.9613 | 20.25 |
| 149.9925 | 26.75 |

|          |       |          |       |
|----------|-------|----------|-------|
| 149.9888 | 12.75 | 150.0275 | 24.25 |
| 150.0188 | 11.75 | 150.0588 | 24.5  |
| 150.0525 | 15.25 | 150.0913 | 25    |
| 150.085  | 11.75 | 150.125  | 25.75 |
| 150.12   | 14.75 | 150.1613 | 25    |
| 150.1538 | 9.75  | 150.195  | 21    |
| 150.1888 | 12    | 150.2313 | 20    |
| 150.2225 | 13    | 150.26   | 23    |
| 150.2563 | 11.5  | 150.2963 | 24.25 |
| 150.2875 | 15.25 | 150.3263 | 24    |
| 150.3213 | 18    | 150.3563 | 19.25 |
| 150.355  | 12.25 | 150.3913 | 18.25 |
| 150.3888 | 10.75 | 150.4238 | 23.25 |
| 150.4238 | 14    | 150.4613 | 20.25 |
| 150.4563 | 11.75 | 150.4925 | 22    |
| 150.4888 | 10    | 150.5263 | 20.75 |
| 150.5188 | 11.5  | 150.5588 | 20.5  |
| 150.5525 | 13.25 | 150.5913 | 19    |
| 150.5863 | 10.5  | 150.625  | 24.75 |
| 150.62   | 10.5  | 150.66   | 19.25 |
| 150.6525 | 10.5  | 150.695  | 20    |
| 150.69   | 13.25 | 150.73   | 14.5  |
| 150.7225 | 11.5  | 150.76   | 19    |
| 150.7538 | 13.25 | 150.7963 | 20.75 |
| 150.7875 | 11.75 | 150.8263 | 18.25 |
| 150.8213 | 11.75 | 150.8563 | 17.75 |
| 150.855  | 11.25 | 150.8913 | 17    |
| 150.8888 | 14.75 | 150.9288 | 20.75 |
| 150.9238 | 15.25 | 150.9613 | 21.25 |
| 150.9563 | 13.75 | 150.9925 | 19.25 |
| 150.9888 | 11.25 | 151.0263 | 20.75 |
| 151.0188 | 16.25 | 151.0588 | 24.75 |
| 151.0525 | 16.5  | 151.0913 | 22.25 |
| 151.085  | 14.5  | 151.1238 | 20.25 |
| 151.12   | 16.75 | 151.16   | 20    |
| 151.1525 | 15.5  | 151.195  | 22.5  |
| 151.19   | 12.5  | 151.23   | 21.5  |
| 151.2225 | 14.25 | 151.26   | 22    |
| 151.2538 | 15.25 | 151.2963 | 19    |
| 151.2875 | 11.25 | 151.3263 | 22.25 |
| 151.3213 | 13.25 | 151.3563 | 24    |
| 151.355  | 15.25 | 151.3938 | 18.25 |
| 151.3888 | 14.75 | 151.4263 | 22.25 |
| 151.4238 | 12.5  | 151.4613 | 18.5  |
| 151.4563 | 13.75 | 151.4925 | 22.25 |
| 151.4888 | 19.5  | 151.525  | 23.25 |
| 151.5213 | 15.5  | 151.5588 | 19.75 |
| 151.5525 | 17    | 151.5913 | 20.5  |
| 151.585  | 12.75 | 151.6238 | 20.5  |
| 151.62   | 12    | 151.66   | 27    |

|          |       |          |       |
|----------|-------|----------|-------|
| 151.6525 | 13.5  | 151.695  | 21.75 |
| 151.69   | 15    | 151.73   | 20.25 |
| 151.7225 | 15    | 151.76   | 18.5  |
| 151.7538 | 10.25 | 151.7963 | 18.75 |
| 151.7875 | 15.25 | 151.8263 | 16.5  |
| 151.8213 | 14    | 151.8563 | 21.25 |
| 151.855  | 17.5  | 151.8913 | 22.5  |
| 151.8888 | 14.75 | 151.9263 | 21.25 |
| 151.9238 | 17.25 | 151.9613 | 19.75 |
| 151.9563 | 13.5  | 151.9925 | 24.75 |
| 151.9888 | 14.75 | 152.025  | 20.5  |
| 152.0213 | 15.25 | 152.0588 | 19.5  |
| 152.0525 | 13.75 | 152.0913 | 24    |
| 152.085  | 12    | 152.1238 | 22.5  |
| 152.1225 | 16.25 | 152.16   | 23.25 |
| 152.1525 | 12.5  | 152.1975 | 18.75 |
| 152.19   | 16.5  | 152.23   | 24.25 |
| 152.2225 | 12.5  | 152.26   | 21.25 |
| 152.2538 | 17.75 | 152.2963 | 19.5  |
| 152.2875 | 14.5  | 152.3263 | 21.75 |
| 152.3213 | 14.75 | 152.3563 | 18.75 |
| 152.355  | 19.5  | 152.3913 | 20.5  |
| 152.3875 | 15.5  | 152.4263 | 19.75 |
| 152.4238 | 14    | 152.4613 | 17.5  |
| 152.4575 | 12.75 | 152.4925 | 17    |
| 152.4888 | 14    | 152.525  | 20.25 |
| 152.5213 | 12.25 | 152.5588 | 22.75 |
| 152.5525 | 16    | 152.5913 | 17.75 |
| 152.585  | 17.25 | 152.625  | 21.5  |
| 152.62   | 17.25 | 152.66   | 19.75 |
| 152.6525 | 16    | 152.695  | 23    |
| 152.69   | 12.75 | 152.73   | 18.75 |
| 152.7238 | 11.75 | 152.76   | 18    |
| 152.7538 | 14.5  | 152.7938 | 18.5  |
| 152.7875 | 21    | 152.8263 | 19.75 |
| 152.8213 | 15.75 | 152.8563 | 18.25 |
| 152.855  | 13.5  | 152.8913 | 17.5  |
| 152.8875 | 14.5  | 152.9263 | 20.25 |
| 152.9238 | 16    | 152.9613 | 20    |
| 152.9563 | 15.5  | 152.9925 | 21    |
| 152.9888 | 14    | 153.0275 | 24.25 |
| 153.0213 | 14.5  | 153.0588 | 22    |
| 153.0525 | 14.75 | 153.0913 | 19.5  |
| 153.085  | 16.25 | 153.125  | 20.5  |
| 153.12   | 18.25 | 153.16   | 21.75 |
| 153.1525 | 16    | 153.195  | 23.5  |
| 153.19   | 16.5  | 153.23   | 20.25 |
| 153.2225 | 15.5  | 153.26   | 18.75 |
| 153.255  | 21.5  | 153.2938 | 18.75 |
| 153.2875 | 18.25 | 153.3263 | 19.25 |

|          |       |          |       |
|----------|-------|----------|-------|
| 153.3213 | 15.25 | 153.3563 | 24.5  |
| 153.355  | 18.5  | 153.3913 | 19.25 |
| 153.3875 | 17.25 | 153.4238 | 23.5  |
| 153.4238 | 15.75 | 153.4613 | 20.75 |
| 153.4563 | 16.25 | 153.4925 | 23    |
| 153.4888 | 13.75 | 153.525  | 24    |
| 153.5213 | 15    | 153.5588 | 19.75 |
| 153.5513 | 11.25 | 153.5913 | 19    |
| 153.585  | 14.5  | 153.625  | 22.5  |
| 153.62   | 10.75 | 153.6613 | 20.25 |
| 153.6525 | 11    | 153.695  | 19.75 |
| 153.69   | 11.75 | 153.73   | 24.75 |
| 153.7225 | 14.5  | 153.76   | 21.5  |
| 153.755  | 11    | 153.7938 | 22.75 |
| 153.7875 | 11.75 | 153.8263 | 20.25 |
| 153.8213 | 14.25 | 153.8563 | 19.25 |
| 153.855  | 18.75 | 153.8913 | 20.75 |
| 153.8875 | 14    | 153.9238 | 20.25 |
| 153.9213 | 12.75 | 153.9613 | 19.75 |
| 153.9563 | 17.5  | 153.9925 | 18.5  |
| 153.9888 | 17.75 | 154.025  | 19.5  |
| 154.0213 | 14.75 | 154.0588 | 23    |
| 154.0513 | 18.5  | 154.0913 | 18    |
| 154.085  | 14.75 | 154.125  | 23.25 |
| 154.12   | 20.75 | 154.1613 | 22    |
| 154.1525 | 16    | 154.195  | 20.5  |
| 154.19   | 18.25 | 154.23   | 20.75 |
| 154.2225 | 16.75 | 154.26   | 24.5  |
| 154.255  | 15.5  | 154.2938 | 23.5  |
| 154.2875 | 16.75 | 154.3263 | 21.25 |
| 154.3213 | 18.5  | 154.3563 | 19.5  |
| 154.355  | 15.5  | 154.3913 | 22.5  |
| 154.3875 | 15.5  | 154.4238 | 16.25 |
| 154.4213 | 14    | 154.4613 | 25    |
| 154.4563 | 15    | 154.4925 | 19.25 |
| 154.4913 | 13.5  | 154.525  | 20    |
| 154.5213 | 17.5  | 154.5588 | 26    |
| 154.5513 | 14    | 154.5913 | 21    |
| 154.585  | 14.25 | 154.625  | 22.75 |
| 154.62   | 11.5  | 154.6613 | 23.5  |
| 154.65   | 15.75 | 154.695  | 25    |
| 154.69   | 14    | 154.73   | 24.75 |
| 154.7225 | 12.75 | 154.76   | 20.5  |
| 154.755  | 12.5  | 154.7938 | 25.5  |
| 154.7875 | 17.5  | 154.8263 | 23    |
| 154.8213 | 13.5  | 154.8563 | 19.75 |
| 154.855  | 13.75 | 154.8913 | 19.75 |
| 154.8875 | 15.5  | 154.9238 | 22.75 |
| 154.9213 | 14.75 | 154.9613 | 21.25 |
| 154.9563 | 14.25 | 154.9925 | 18.75 |

|          |       |          |       |
|----------|-------|----------|-------|
| 154.9913 | 12.5  | 155.025  | 21.75 |
| 155.0213 | 14.25 | 155.0588 | 22    |
| 155.0513 | 13.5  | 155.0913 | 20.5  |
| 155.085  | 12    | 155.125  | 22    |
| 155.12   | 15.25 | 155.1613 | 25.25 |
| 155.15   | 16.25 | 155.195  | 21.25 |
| 155.19   | 14.5  | 155.23   | 21    |
| 155.2225 | 12.25 | 155.26   | 23.75 |
| 155.255  | 15.5  | 155.2938 | 28    |
| 155.2875 | 17.5  | 155.3263 | 27.5  |
| 155.3213 | 12.25 | 155.3563 | 19.25 |
| 155.355  | 15.5  | 155.3913 | 22.25 |
| 155.3875 | 13.75 | 155.4263 | 25.25 |
| 155.42   | 13.25 | 155.4613 | 23.5  |
| 155.4563 | 12.75 | 155.4925 | 19.5  |
| 155.4913 | 17.75 | 155.525  | 25.5  |
| 155.5213 | 13.5  | 155.5575 | 19.75 |
| 155.5513 | 14.5  | 155.5913 | 22.5  |
| 155.585  | 12    | 155.625  | 21.5  |
| 155.62   | 10.75 | 155.6625 | 17.75 |
| 155.65   | 17.5  | 155.695  | 20.25 |
| 155.69   | 12.25 | 155.73   | 22.25 |
| 155.7225 | 15    | 155.76   | 20.75 |
| 155.755  | 13.25 | 155.7938 | 22.25 |
| 155.7875 | 13    | 155.8263 | 19.75 |
| 155.8213 | 13.75 | 155.8563 | 19.5  |
| 155.855  | 14.75 | 155.8913 | 20.75 |
| 155.8875 | 14    | 155.9263 | 21    |
| 155.9213 | 13    | 155.9638 | 18.75 |
| 155.9563 | 15.75 | 155.9925 | 22.5  |
| 155.9913 | 15.5  | 156.025  | 19.75 |
| 156.0213 | 16.5  | 156.0575 | 20.25 |
| 156.0525 | 13.75 | 156.0913 | 18.5  |
| 156.085  | 17.25 | 156.125  | 22.75 |
| 156.1188 | 13.75 | 156.1613 | 17.5  |
| 156.15   | 11.5  | 156.195  | 18.25 |
| 156.19   | 13    | 156.23   | 20.5  |
| 156.2238 | 13.25 | 156.26   | 22.25 |
| 156.255  | 14    | 156.2938 | 17.75 |
| 156.2875 | 11.75 | 156.3263 | 16.25 |
| 156.3213 | 15.5  | 156.3563 | 17.25 |
| 156.355  | 13.75 | 156.3938 | 17    |
| 156.3875 | 11    | 156.4263 | 19.25 |
| 156.42   | 13.5  | 156.4613 | 20    |
| 156.4563 | 11.75 | 156.4925 | 21.25 |
| 156.4913 | 15.25 | 156.525  | 22.5  |
| 156.5213 | 14.25 | 156.5575 | 18    |
| 156.5513 | 11.5  | 156.5913 | 21.75 |
| 156.585  | 11.75 | 156.6263 | 20.25 |
| 156.6188 | 13.75 | 156.6613 | 22.75 |

|          |       |          |       |
|----------|-------|----------|-------|
| 156.65   | 14.75 | 156.695  | 26.25 |
| 156.6888 | 14.75 | 156.73   | 23.5  |
| 156.7238 | 16.5  | 156.76   | 16.25 |
| 156.755  | 17.5  | 156.7938 | 19.25 |
| 156.7875 | 15    | 156.8263 | 20    |
| 156.8213 | 14.5  | 156.8563 | 22    |
| 156.855  | 16.25 | 156.8938 | 22.25 |
| 156.8875 | 17.25 | 156.9288 | 21.75 |
| 156.92   | 15.25 | 156.9613 | 20.25 |
| 156.9563 | 13    | 156.9925 | 22.25 |
| 156.9913 | 13.5  | 157.025  | 24.75 |
| 157.0213 | 16    | 157.0575 | 22.75 |
| 157.0513 | 11.25 | 157.0913 | 27    |
| 157.085  | 14.75 | 157.1263 | 23    |
| 157.1188 | 13.5  | 157.1613 | 23.75 |
| 157.15   | 15.5  | 157.195  | 22.25 |
| 157.1888 | 15.75 | 157.23   | 17.5  |
| 157.2238 | 13    | 157.26   | 23    |
| 157.255  | 15.5  | 157.2938 | 21    |
| 157.2875 | 15    | 157.3263 | 23.75 |
| 157.3188 | 15.5  | 157.3563 | 21.5  |
| 157.355  | 12.25 | 157.3938 | 21.25 |
| 157.3875 | 12.75 | 157.4263 | 22    |
| 157.4175 | 15    | 157.4613 | 17.5  |
| 157.4588 | 11.25 | 157.4925 | 25    |
| 157.4913 | 14    | 157.525  | 19.5  |
| 157.5213 | 16    | 157.56   | 19.75 |
| 157.5513 | 15    | 157.5913 | 24.5  |
| 157.585  | 13.75 | 157.6263 | 23    |
| 157.6188 | 14.75 | 157.6613 | 19.25 |
| 157.65   | 14.75 | 157.695  | 21.75 |
| 157.6888 | 14.5  | 157.73   | 24.5  |
| 157.7238 | 15.75 | 157.76   | 19.5  |
| 157.755  | 12    | 157.7938 | 14.75 |
| 157.7875 | 16.5  | 157.8263 | 20    |
| 157.8188 | 19    | 157.8563 | 19.5  |
| 157.8525 | 16.25 | 157.8938 | 17.25 |
| 157.8875 | 14.5  | 157.9263 | 19.75 |
| 157.9175 | 18.5  | 157.9613 | 23    |
| 157.9588 | 13.25 | 157.9925 | 21.75 |
| 157.9913 | 13.25 | 158.025  | 17.75 |
| 158.0238 | 15    | 158.0575 | 24.5  |
| 158.0538 | 11    | 158.0913 | 24.5  |
| 158.0875 | 15    | 158.1263 | 19    |
| 158.1213 | 12.75 | 158.1625 | 22    |
| 158.1525 | 10.75 | 158.1975 | 24.75 |
| 158.1913 | 15.5  | 158.23   | 23.25 |
| 158.2263 | 12.5  | 158.26   | 19.75 |
| 158.2575 | 12.75 | 158.2938 | 22.5  |
| 158.2888 | 10.75 | 158.3263 | 20.5  |

|          |       |          |       |
|----------|-------|----------|-------|
| 158.32   | 11.5  | 158.3563 | 26    |
| 158.3538 | 13.25 | 158.3938 | 23    |
| 158.3888 | 15.5  | 158.4263 | 20.75 |
| 158.4213 | 11.5  | 158.4613 | 25.25 |
| 158.46   | 15    | 158.4925 | 21.75 |
| 158.4925 | 13    | 158.525  | 16.25 |
| 158.5238 | 14    | 158.5575 | 20    |
| 158.5538 | 12.25 | 158.5913 | 18.75 |
| 158.5875 | 13    | 158.6263 | 21.25 |
| 158.6213 | 16.25 | 158.6625 | 20.75 |
| 158.6525 | 13.75 | 158.6975 | 20.75 |
| 158.6925 | 13.75 | 158.73   | 17.5  |
| 158.7263 | 15.25 | 158.76   | 20    |
| 158.7575 | 13.25 | 158.7938 | 19.5  |
| 158.7888 | 13    | 158.8263 | 18.75 |
| 158.82   | 12.5  | 158.8563 | 17.75 |
| 158.8538 | 14.75 | 158.8938 | 19.25 |
| 158.8888 | 12.25 | 158.9288 | 19.5  |
| 158.9225 | 12    | 158.9613 | 19.5  |
| 158.96   | 14.25 | 158.9925 | 21.5  |
| 158.9925 | 14.5  | 159.025  | 18    |
| 159.0238 | 12.5  | 159.0575 | 20.25 |
| 159.0538 | 11.75 | 159.0913 | 16.25 |
| 159.0875 | 13.5  | 159.1288 | 21.25 |
| 159.1213 | 12.25 | 159.1625 | 21.75 |
| 159.1525 | 10    | 159.1975 | 17    |
| 159.1925 | 11.5  | 159.23   | 18.5  |
| 159.2263 | 11.5  | 159.26   | 22.25 |
| 159.2575 | 10    | 159.2938 | 20    |
| 159.2888 | 9     | 159.3263 | 22.5  |
| 159.32   | 12    | 159.3563 | 19.75 |
| 159.3538 | 9.5   | 159.3938 | 22    |
| 159.3888 | 11.25 | 159.4288 | 25    |
| 159.4213 | 11.25 | 159.4638 | 24.5  |
| 159.4575 | 12.25 | 159.495  | 19.75 |
| 159.4925 | 12    | 159.5288 | 18.75 |
| 159.5238 | 11.75 | 159.56   | 21.5  |
| 159.5538 | 12    | 159.5938 | 21    |
| 159.5888 | 14.75 | 159.6288 | 20.25 |
| 159.6213 | 9.25  | 159.6638 | 19.25 |
| 159.6525 | 16.5  | 159.6988 | 20.75 |
| 159.6925 | 14.5  | 159.7313 | 16.75 |
| 159.7263 | 12.5  | 159.7625 | 22.5  |
| 159.7575 | 15.25 | 159.795  | 18.5  |
| 159.7888 | 12.75 | 159.8313 | 18    |
| 159.82   | 17    | 159.8575 | 17    |
| 159.8538 | 13.75 | 159.8963 | 16.25 |
| 159.8888 | 15    | 159.9288 | 16    |
| 159.9213 | 16.5  | 159.9638 | 18.25 |
| 159.9575 | 15    | 159.995  | 14.25 |



|          |       |          |       |
|----------|-------|----------|-------|
| 159.9925 | 16.25 | 160.0288 | 14.25 |
| 160.0238 | 16    | 160.06   | 19.75 |
| 160.0538 | 16    | 160.0938 | 16    |
| 160.0875 | 19.25 | 160.1313 | 18    |
| 160.1213 | 16.25 | 160.1638 | 17    |
| 160.1525 | 17.5  | 160.1988 | 16.25 |
| 160.1925 | 16.75 | 160.2313 | 17    |
| 160.2263 | 14.25 | 160.2625 | 16.5  |
| 160.2575 | 17.5  | 160.295  | 16    |
| 160.2888 | 16    | 160.3275 | 13.25 |
| 160.32   | 16    | 160.3575 | 16.25 |
| 160.3538 | 18.5  | 160.3988 | 14.5  |
| 160.3863 | 18.75 | 160.4288 | 13    |
| 160.4238 | 20.25 | 160.4638 | 14.5  |
| 160.4575 | 18.75 | 160.4975 | 11    |
| 160.4925 | 15    | 160.5288 | 15.5  |
| 160.5238 | 19.75 | 160.56   | 13.75 |
| 160.5538 | 17.25 | 160.5938 | 13.25 |
| 160.5875 | 21.25 | 160.6313 | 18.75 |
| 160.6213 | 19.75 | 160.6638 | 16.25 |
| 160.6525 | 19    | 160.6988 | 15.25 |
| 160.6925 | 20.25 | 160.7313 | 21.5  |
| 160.7263 | 19.75 | 160.7625 | 14.5  |
| 160.7575 | 15.75 | 160.795  | 20.25 |
| 160.7888 | 15.75 | 160.825  | 17.5  |
| 160.82   | 18.75 | 160.8575 | 19    |
| 160.8538 | 16.5  | 160.8988 | 20    |
| 160.8863 | 15.75 | 160.9288 | 16.25 |
| 160.9238 | 19    | 160.9638 | 17    |
| 160.9575 | 14    | 160.995  | 18.5  |
| 160.9925 | 17.25 | 161.0288 | 19.5  |
| 161.0238 | 15.5  | 161.06   | 15.25 |
| 161.0538 | 14.75 | 161.0938 | 15    |
| 161.0875 | 15.5  | 161.1313 | 19    |
| 161.12   | 15.25 | 161.1638 | 15.75 |
| 161.1525 | 12.75 | 161.1988 | 17.75 |
| 161.1925 | 13.75 | 161.2313 | 16.75 |
| 161.2263 | 15    | 161.2625 | 13.25 |
| 161.2575 | 15    | 161.295  | 16    |
| 161.2888 | 16    | 161.325  | 12.75 |
| 161.3213 | 16    | 161.3575 | 17.5  |
| 161.355  | 15.25 | 161.3988 | 17.25 |
| 161.39   | 14.5  | 161.4288 | 14.25 |
| 161.4275 | 14    | 161.4638 | 20.25 |
| 161.4588 | 14.5  | 161.495  | 11.25 |
| 161.4938 | 20.25 | 161.5288 | 15    |
| 161.5263 | 28.25 | 161.56   | 16    |
| 161.5563 | 19.5  | 161.5938 | 15.5  |
| 161.5925 | 15.75 | 161.6313 | 19.5  |
| 161.6225 | 16    | 161.6638 | 14.75 |

|          |       |          |       |
|----------|-------|----------|-------|
| 161.655  | 19.75 | 161.6988 | 16.75 |
| 161.695  | 19.25 | 161.7313 | 18    |
| 161.7288 | 16.5  | 161.7625 | 16.25 |
| 161.76   | 17.5  | 161.795  | 18    |
| 161.79   | 17.25 | 161.825  | 20.25 |
| 161.8213 | 16.25 | 161.8575 | 14.25 |
| 161.855  | 17.5  | 161.8988 | 16.75 |
| 161.8875 | 15    | 161.9288 | 15.75 |
| 161.9275 | 14.25 | 161.9638 | 16.75 |
| 161.9588 | 21    | 161.995  | 14    |
| 161.9938 | 18.75 | 162.0288 | 18    |
| 162.0263 | 17.5  | 162.0625 | 21.75 |
| 162.0563 | 18.25 | 162.0938 | 18.25 |
| 162.09   | 18.5  | 162.1325 | 11.75 |
| 162.1225 | 15.75 | 162.1638 | 17.75 |
| 162.1575 | 15.75 | 162.1988 | 20    |
| 162.195  | 15.25 | 162.2313 | 22.75 |
| 162.2263 | 15    | 162.2625 | 17    |
| 162.26   | 15.75 | 162.295  | 21    |
| 162.29   | 14.5  | 162.325  | 21    |
| 162.3213 | 18.5  | 162.36   | 18.25 |
| 162.355  | 13    | 162.3988 | 21.25 |
| 162.3875 | 11    | 162.4288 | 20.5  |
| 162.4275 | 13.5  | 162.4638 | 20.5  |
| 162.4588 | 17.25 | 162.495  | 21    |
| 162.4938 | 12.75 | 162.5263 | 19.75 |
| 162.5263 | 15    | 162.56   | 14    |
| 162.5563 | 15.75 | 162.5938 | 15.5  |
| 162.59   | 14.5  | 162.6313 | 22.5  |
| 162.6225 | 17.25 | 162.6638 | 20.5  |
| 162.6575 | 17.5  | 162.6988 | 19.5  |
| 162.695  | 12    | 162.7313 | 18.75 |
| 162.7263 | 18.5  | 162.7625 | 22.75 |
| 162.76   | 12.75 | 162.795  | 28.75 |
| 162.79   | 14    | 162.825  | 25.5  |
| 162.8213 | 16    | 162.86   | 19    |
| 162.855  | 16    | 162.8988 | 17.25 |
| 162.8875 | 17.5  | 162.9288 | 23.25 |
| 162.9275 | 17    | 162.9638 | 23.25 |
| 162.9588 | 15.75 | 162.995  | 18.75 |
| 162.9963 | 17.5  | 163.0288 | 19.75 |
| 163.0263 | 17.25 | 163.06   | 19.5  |
| 163.0563 | 15.5  | 163.0938 | 14.75 |
| 163.09   | 18    | 163.1313 | 15.5  |
| 163.1225 | 16.5  | 163.1638 | 17    |
| 163.16   | 19.25 | 163.1988 | 19.25 |
| 163.195  | 14    | 163.2313 | 15.5  |
| 163.2263 | 14.25 | 163.2625 | 19.75 |
| 163.26   | 16.75 | 163.295  | 19.5  |
| 163.29   | 13    | 163.325  | 18.5  |

|          |       |          |       |
|----------|-------|----------|-------|
| 163.3213 | 13.25 | 163.3613 | 21.5  |
| 163.355  | 18.5  | 163.3988 | 16.75 |
| 163.3888 | 15.25 | 163.4288 | 17.5  |
| 163.4275 | 14.75 | 163.4638 | 15.25 |
| 163.4588 | 12.25 | 163.495  | 16.25 |
| 163.4938 | 14    | 163.5263 | 16.5  |
| 163.5263 | 16.5  | 163.56   | 15.75 |
| 163.5563 | 15.5  | 163.5938 | 17    |
| 163.59   | 15.25 | 163.6313 | 15.5  |
| 163.6225 | 14.5  | 163.6663 | 13    |
| 163.6588 | 14.5  | 163.6988 | 13.5  |
| 163.6925 | 14.75 | 163.7313 | 15.5  |
| 163.7263 | 11.5  | 163.7625 | 14.25 |
| 163.76   | 16.5  | 163.795  | 14.75 |
| 163.79   | 16.25 | 163.8275 | 14.75 |
| 163.8213 | 12.75 | 163.8638 | 15    |
| 163.855  | 13.75 | 163.8988 | 13.75 |
| 163.8863 | 17.25 | 163.9288 | 12.75 |
| 163.9275 | 16.5  | 163.9638 | 13.5  |
| 163.9588 | 14    | 163.995  | 22    |
| 163.9938 | 18.25 | 164.0263 | 14.75 |
| 164.0263 | 15    | 164.06   | 17    |
| 164.0563 | 18    | 164.0938 | 16.75 |
| 164.09   | 14.75 | 164.1313 | 20    |
| 164.1225 | 14    | 164.1638 | 20    |
| 164.1588 | 15.25 | 164.1988 | 20.75 |
| 164.1925 | 14    | 164.2313 | 20.75 |
| 164.2263 | 14.75 | 164.2625 | 16    |
| 164.26   | 15.25 | 164.295  | 19    |
| 164.29   | 9.75  | 164.3275 | 17.5  |
| 164.3213 | 16.5  | 164.3638 | 14.75 |
| 164.355  | 11.25 | 164.3988 | 15.75 |
| 164.3863 | 14.5  | 164.4288 | 20.25 |
| 164.4275 | 13    | 164.4638 | 16.75 |
| 164.4613 | 11    | 164.495  | 14    |
| 164.4963 | 12    | 164.5288 | 19    |
| 164.5288 | 11.75 | 164.56   | 19.5  |
| 164.5588 | 12.75 | 164.5938 | 15.5  |
| 164.5913 | 14    | 164.6313 | 21.25 |
| 164.6238 | 12.75 | 164.6638 | 19.75 |
| 164.66   | 16    | 164.6988 | 20.25 |
| 164.6938 | 14    | 164.7313 | 18.25 |
| 164.7288 | 14.75 | 164.7625 | 19.75 |
| 164.7613 | 12.75 | 164.795  | 19.25 |
| 164.7913 | 12.5  | 164.8275 | 18.5  |
| 164.8238 | 14.25 | 164.8638 | 17.75 |
| 164.8575 | 17    | 164.8988 | 16.5  |
| 164.8888 | 13.75 | 164.9288 | 17    |
| 164.93   | 14.5  | 164.9638 | 20    |
| 164.9613 | 14    | 164.995  | 19.5  |

|          |       |          |       |
|----------|-------|----------|-------|
| 164.9963 | 19    | 165.0263 | 17.25 |
| 165.0288 | 15.5  | 165.06   | 19.5  |
| 165.0588 | 16    | 165.0963 | 17.5  |
| 165.0913 | 16.25 | 165.1313 | 15.25 |
| 165.1238 | 19.5  | 165.1638 | 18.5  |
| 165.16   | 12.5  | 165.1988 | 18.25 |
| 165.1938 | 15.5  | 165.2313 | 17.5  |
| 165.2288 | 14    | 165.2625 | 19.25 |
| 165.2613 | 16.5  | 165.2963 | 19    |
| 165.2913 | 16    | 165.3275 | 18.5  |
| 165.3238 | 13.75 | 165.3638 | 17.75 |
| 165.3575 | 12.75 | 165.3988 | 19    |
| 165.3888 | 14    | 165.4288 | 17.25 |
| 165.43   | 14.5  | 165.4638 | 19.75 |
| 165.4613 | 9.5   | 165.495  | 20.75 |
| 165.4963 | 14.75 | 165.5263 | 25    |
| 165.5288 | 9.5   | 165.56   | 17    |
| 165.5588 | 10.75 | 165.5963 | 18.25 |
| 165.5913 | 14    | 165.6313 | 17.25 |
| 165.6263 | 12    | 165.6638 | 26.5  |
| 165.66   | 10.75 | 165.6988 | 24    |
| 165.6938 | 16.75 | 165.7313 | 19.25 |
| 165.7288 | 13.75 | 165.7625 | 20.75 |
| 165.7613 | 16.5  | 165.795  | 22.75 |
| 165.7913 | 19.75 | 165.8275 | 21.25 |
| 165.8238 | 16    | 165.8638 | 19.75 |
| 165.8575 | 17.25 | 165.8963 | 17.75 |
| 165.8888 | 18    | 165.9288 | 20.75 |
| 165.93   | 18.5  | 165.9638 | 18.25 |
| 165.9613 | 19.25 | 165.995  | 19.25 |
| 165.9963 | 14.75 | 166.0263 | 20.75 |
| 166.0288 | 17.25 | 166.06   | 19    |
| 166.0588 | 22.75 | 166.0963 | 20.5  |
| 166.0913 | 14.25 | 166.1313 | 20.5  |
| 166.1263 | 15.5  | 166.1638 | 17.25 |
| 166.16   | 18    | 166.1988 | 20    |
| 166.1938 | 13.5  | 166.2313 | 21.5  |
| 166.2288 | 17.5  | 166.2625 | 18.75 |
| 166.2613 | 17.75 | 166.295  | 20.5  |
| 166.2913 | 12.5  | 166.3275 | 19.5  |
| 166.3238 | 18.25 | 166.3638 | 21.5  |
| 166.3575 | 19.5  | 166.3963 | 24.5  |
| 166.3888 | 12.75 | 166.4288 | 21    |
| 166.4275 | 25.5  | 166.4638 | 17.5  |
| 166.4613 | 18.25 | 166.4975 | 22.25 |
| 166.4963 | 21.75 | 166.5288 | 17.5  |
| 166.5288 | 23.5  | 166.5613 | 15.25 |
| 166.5588 | 12.5  | 166.5975 | 20.25 |
| 166.5913 | 28.25 | 166.6325 | 20    |
| 166.6263 | 20.75 | 166.6663 | 19    |

|          |       |          |       |
|----------|-------|----------|-------|
| 166.6588 | 12.5  | 166.7    | 16.75 |
| 166.6938 | 24.75 | 166.7325 | 20    |
| 166.7288 | 20.5  | 166.7638 | 18.5  |
| 166.7613 | 15    | 166.7975 | 22    |
| 166.7913 | 20.75 | 166.8313 | 13.5  |
| 166.8238 | 16.25 | 166.8663 | 17.75 |
| 166.8575 | 16.5  | 166.9    | 17.5  |
| 166.8888 | 19.5  | 166.9313 | 21.5  |
| 166.9275 | 24    | 166.9663 | 18.75 |
| 166.9613 | 23.25 | 166.9975 | 18    |
| 166.9963 | 23.5  | 167.0288 | 19.5  |
| 167.0288 | 20.75 | 167.0613 | 21.5  |
| 167.0588 | 21.75 | 167.0975 | 20.25 |
| 167.0913 | 22.75 | 167.1325 | 14.25 |
| 167.1263 | 20    | 167.1663 | 20.5  |
| 167.1588 | 19.25 | 167.2    | 17.5  |
| 167.1938 | 20.5  | 167.2325 | 19.25 |
| 167.2288 | 18.5  | 167.2638 | 18.5  |
| 167.2613 | 19    | 167.2975 | 13.5  |
| 167.2913 | 21    | 167.3313 | 14.5  |
| 167.3238 | 19.5  | 167.3663 | 21.5  |
| 167.3575 | 16.25 | 167.4    | 20.75 |
| 167.3888 | 16.5  | 167.4338 | 18    |
| 167.4275 | 15    | 167.4663 | 17    |
| 167.4613 | 18    | 167.4975 | 17.25 |
| 167.4938 | 16.75 | 167.5288 | 16    |
| 167.5288 | 16.5  | 167.5613 | 16.75 |
| 167.5588 | 17    | 167.5975 | 21.25 |
| 167.5913 | 17    | 167.6325 | 18.75 |
| 167.6263 | 16.25 | 167.6663 | 19.5  |
| 167.6588 | 16    | 167.7025 | 22    |
| 167.6938 | 17.5  | 167.7325 | 21.75 |
| 167.7288 | 20.75 | 167.7638 | 21    |
| 167.7613 | 17.25 | 167.7975 | 22.25 |
| 167.7925 | 18    | 167.8338 | 21.5  |
| 167.8238 | 16.25 | 167.8675 | 23.5  |
| 167.8575 | 18    | 167.9013 | 23.75 |
| 167.8888 | 21    | 167.9363 | 22    |
| 167.9275 | 20.5  | 167.9688 | 24.75 |
| 167.9613 | 19.25 | 168      | 24    |
| 167.9938 | 20.5  | 168.03   | 22.25 |
| 168.0288 | 16.5  | 168.0625 | 24    |
| 168.0588 | 16.5  | 168.1038 | 22.75 |
| 168.0913 | 20    | 168.135  | 26.25 |
| 168.1263 | 19    | 168.1675 | 27.25 |
| 168.1588 | 19.25 | 168.1988 | 22.25 |
| 168.1938 | 18.75 | 168.2338 | 23    |
| 168.2288 | 19.75 | 168.2663 | 28    |
| 168.2613 | 19.75 | 168.3    | 33    |
| 168.2913 | 17.5  | 168.335  | 24    |

|          |       |          |       |
|----------|-------|----------|-------|
| 168.3238 | 14.25 | 168.3675 | 20    |
| 168.3588 | 16.5  | 168.4013 | 20.5  |
| 168.3888 | 17    | 168.4363 | 19.25 |
| 168.4275 | 16    | 168.4688 | 20    |
| 168.4613 | 14.5  | 168.5    | 22.25 |
| 168.4938 | 19.75 | 168.53   | 17.75 |
| 168.5288 | 16.5  | 168.5663 | 19.25 |
| 168.5588 | 16.25 | 168.6038 | 23    |
| 168.5913 | 17.25 | 168.635  | 23    |
| 168.6263 | 17.5  | 168.6675 | 17.5  |
| 168.6588 | 13.5  | 168.6988 | 22.25 |
| 168.6963 | 16.25 | 168.7338 | 25    |
| 168.7288 | 15    | 168.7663 | 23.75 |
| 168.7613 | 17.5  | 168.8    | 24.25 |
| 168.7913 | 16    | 168.835  | 22    |
| 168.8263 | 11.5  | 168.8675 | 20.75 |
| 168.8588 | 14.5  | 168.9013 | 18.75 |
| 168.8888 | 14    | 168.9363 | 28.25 |
| 168.925  | 16    | 168.9688 | 23.5  |
| 168.9613 | 16.5  | 169      | 21    |
| 168.9938 | 18    | 169.03   | 21    |
| 169.0288 | 19.75 | 169.0663 | 25.75 |
| 169.0588 | 16    | 169.1038 | 19.75 |
| 169.0913 | 19.25 | 169.135  | 28.5  |
| 169.1263 | 17.5  | 169.1675 | 36    |
| 169.1588 | 14.25 | 169.1988 | 21    |
| 169.1963 | 18.5  | 169.2338 | 23.5  |
| 169.2288 | 16.5  | 169.2663 | 23.25 |
| 169.2613 | 17.25 | 169.3    | 40.75 |
| 169.2913 | 18.75 | 169.335  | 47.5  |
| 169.3263 | 13    | 169.3675 | 18    |
| 169.3588 | 18    |          |       |
| 169.3888 | 12    | 169.4363 | 45.5  |
| 169.425  | 12.25 | 169.4688 | 35.75 |
| 169.4613 | 13.5  | 169.5    | 31.75 |
| 169.4938 | 13.25 | 169.53   | 40.25 |
| 169.5288 | 15.25 |          |       |
| 169.5588 | 18.5  | 169.6038 | 29    |
| 169.5913 | 15    | 169.635  | 35.75 |
| 169.6263 | 13    | 169.6675 | 32.25 |
| 169.6588 | 13    | 169.6988 | 25    |
| 169.695  | 14.5  | 169.7338 | 28.25 |
| 169.7288 | 13.75 | 169.7663 | 17.5  |
| 169.7613 | 15    | 169.8013 | 18.25 |
| 169.7913 | 15.75 | 169.835  | 25.5  |
| 169.8263 | 17.25 | 169.8675 | 24.25 |
| 169.8588 | 15.75 | 169.9013 | 17.5  |
| 169.8888 | 12.75 | 169.9363 | 25    |
| 169.925  | 14.25 | 169.9688 | 21.75 |
| 169.9613 | 14.75 | 170      | 22    |

|          |       |          |       |
|----------|-------|----------|-------|
| 169.9938 | 12.25 | 170.03   | 23.5  |
| 170.0288 | 13    | 170.0663 | 24.75 |
| 170.0588 | 14.25 | 170.1038 | 21    |
| 170.0913 | 13    | 170.135  | 27.5  |
| 170.1263 | 15    | 170.165  | 25.75 |
| 170.1588 | 15.5  | 170.1988 | 20    |
| 170.195  | 12.75 | 170.2338 | 31.75 |
| 170.2288 | 9.5   | 170.2663 | 38    |
| 170.2613 | 12.75 | 170.3013 | 32    |
| 170.2913 | 14.5  | 170.3363 | 24    |
| 170.3263 | 15.25 | 170.3675 | 31    |
| 170.3588 | 15.25 | 170.4013 | 31.25 |
| 170.3888 | 17.75 | 170.4363 | 23    |
| 170.425  | 15.75 | 170.4688 | 21.25 |
| 170.4613 | 15.25 | 170.5    | 21.5  |
| 170.4938 | 17    | 170.53   | 17.5  |
| 170.5288 | 17.25 | 170.5663 | 23.5  |
| 170.5588 | 12    | 170.6038 | 14.5  |
| 170.5913 | 11.75 | 170.635  | 17.5  |
| 170.6263 | 15    | 170.665  | 20    |
| 170.6588 | 14.75 | 170.6988 | 16.25 |
| 170.695  | 14.5  | 170.7338 | 16.75 |
| 170.7288 | 12.75 | 170.7663 | 17.5  |
| 170.76   | 10    | 170.8038 | 16.75 |
| 170.7913 | 10.25 | 170.8388 | 19.25 |
| 170.8263 | 11.75 | 170.8675 | 16.5  |
| 170.8588 | 10.25 | 170.9013 | 13    |
| 170.8888 | 13    | 170.9363 | 18.75 |
| 170.925  | 14    | 170.9688 | 15.75 |
| 170.9613 | 12    | 171      | 13.75 |
| 170.9938 | 12    | 171.03   | 15    |
| 171.0288 | 13.25 | 171.0663 | 16.75 |
| 171.0588 | 12.25 | 171.1038 | 17.75 |
| 171.0913 | 13    | 171.135  | 14    |
| 171.1263 | 13    | 171.165  | 12.25 |
| 171.1588 | 11.5  | 171.1988 | 17.25 |
| 171.1963 | 11.25 | 171.2338 | 15.5  |
| 171.2288 | 10    | 171.2663 | 16.5  |
| 171.26   | 10.75 | 171.3038 | 20    |
| 171.2913 | 12    | 171.3363 | 18.5  |
| 171.3263 | 9.5   | 171.3675 | 20.5  |
| 171.3588 | 6.25  | 171.4013 | 21.75 |
| 171.3888 | 14.25 | 171.4363 | 18.75 |
| 171.425  | 14    | 171.47   | 17.25 |
| 171.4613 | 13.5  | 171.5    | 19.25 |
| 171.4938 | 13.25 | 171.5325 | 16.25 |
| 171.5288 | 13.5  | 171.5663 | 17    |
| 171.56   | 17.25 | 171.6038 | 20    |
| 171.5913 | 12.5  | 171.635  | 18.5  |
| 171.6263 | 12.25 | 171.665  | 19    |

|          |       |          |       |
|----------|-------|----------|-------|
| 171.66   | 10.75 | 171.6988 | 20.75 |
| 171.695  | 13.5  | 171.7338 | 16    |
| 171.7288 | 12.5  | 171.7663 | 14.5  |
| 171.76   | 11.75 | 171.8038 | 17.5  |
| 171.7913 | 9     | 171.8363 | 24    |
| 171.8263 | 11    | 171.8675 | 17.5  |
| 171.8588 | 9.75  | 171.9013 | 16    |
| 171.8913 | 10.5  | 171.9363 | 15    |
| 171.9263 | 12.75 | 171.9688 | 17.75 |
| 171.9613 | 11.75 | 172      | 15.5  |
| 171.9938 | 7.75  | 172.0338 | 15.5  |
| 172.0288 | 13    | 172.0663 | 16.25 |
| 172.06   | 13.75 | 172.1038 | 16.75 |
| 172.0913 | 11    | 172.135  | 16.5  |
| 172.1263 | 13.75 | 172.165  | 16.75 |
| 172.1588 | 11.25 | 172.1988 | 20.25 |
| 172.1938 | 14.5  | 172.2338 | 19    |
| 172.2288 | 15    | 172.2663 | 17.5  |
| 172.26   | 16.75 | 172.3038 | 17.25 |
| 172.2913 | 9.5   | 172.3363 | 20.5  |
| 172.3263 | 9.5   | 172.3675 | 17.25 |
| 172.3588 | 10.25 | 172.4013 | 15.25 |
| 172.3913 | 14.75 | 172.4338 | 18.25 |
| 172.4263 | 13.75 | 172.4675 | 22.5  |
| 172.4613 | 13.5  | 172.5    | 20.5  |
| 172.4938 | 13.5  | 172.5325 | 23    |
| 172.5288 | 16.75 | 172.5688 | 22.5  |
| 172.56   | 15.25 | 172.6038 | 19.5  |
| 172.5913 | 13.75 | 172.635  | 26    |
| 172.6263 | 11.75 | 172.665  | 21.25 |
| 172.6588 | 12.75 | 172.6988 | 21.25 |
| 172.6938 | 14.5  | 172.7338 | 17.75 |
| 172.7288 | 12.5  | 172.7688 | 23.75 |
| 172.76   | 11.75 | 172.8038 | 19    |
| 172.7913 | 9.25  | 172.8363 | 21.75 |
| 172.8263 | 17    | 172.8675 | 15.25 |
| 172.8588 | 14    | 172.9013 | 20.5  |
| 172.8888 | 14.75 | 172.9338 | 18    |
| 172.9263 | 13.5  | 172.9675 | 27.75 |
| 172.9613 | 13    | 173      | 21.5  |
| 172.9938 | 11    | 173.0338 | 20.25 |
| 173.0288 | 12.5  | 173.0688 | 16.75 |
| 173.06   | 10.5  | 173.1038 | 19.25 |
| 173.0938 | 13.75 | 173.135  | 19.25 |
| 173.1263 | 11    | 173.165  | 20.75 |
| 173.1588 | 11.75 | 173.1988 | 19.75 |
| 173.1938 | 12.5  | 173.2338 | 20.25 |
| 173.2288 | 12.25 | 173.2675 | 21    |
| 173.26   | 9.25  | 173.3038 | 17.75 |
| 173.2913 | 10    | 173.3363 | 22    |



|          |       |
|----------|-------|
| 173.3263 | 14    |
| 173.3588 | 12    |
| 173.3913 | 15.25 |
| 173.4263 | 11.25 |
| 173.4613 | 10.75 |
| 173.4938 | 11.25 |
| 173.5288 | 13.75 |
| 173.56   | 13.25 |
| 173.5938 | 12    |
| 173.6275 | 14    |
| 173.665  | 16.25 |
| 173.695  | 12.25 |
| 173.73   | 16.5  |
| 173.7625 | 13.75 |
| 173.7963 | 10.25 |
| 173.8288 | 12.75 |
| 173.8613 | 10.75 |
| 173.8963 | 14.5  |
| 173.9288 | 12    |
| 173.9638 | 11    |
| 173.9963 | 13.75 |
| 174.03   | 10    |
| 174.0613 | 10.5  |
| 174.095  | 11    |
| 174.1275 | 11    |
| 174.1625 | 11.75 |
| 174.195  | 11.75 |
| 174.23   | 11    |
| 174.2625 | 8.75  |
| 174.2963 | 9.5   |
| 174.3288 | 9.5   |
| 174.3613 | 11.25 |
| 174.3938 | 8.25  |
| 174.4288 | 12.25 |
| 174.4638 | 11.5  |
| 174.4963 | 13    |
| 174.53   | 14.25 |
| 174.5613 | 16.25 |
| 174.595  | 16.5  |
| 174.6275 | 15    |
| 174.6625 | 11.5  |
| 174.695  | 15    |
| 174.73   | 14    |
| 174.7625 | 13.25 |
| 174.7963 | 11    |
| 174.8288 | 13    |
| 174.8613 | 12.75 |
| 174.8938 | 10    |
| 174.9288 | 14.5  |
| 174.9638 | 14    |

|          |       |
|----------|-------|
| 173.3675 | 22.5  |
| 173.4013 | 25.75 |
| 173.4338 | 23.75 |
| 173.4688 | 27    |
| 173.5    | 22    |
| 173.5338 | 31.75 |
| 173.5688 | 21    |
| 173.6038 | 32.5  |
| 173.635  | 20    |
| 173.665  | 26.25 |
| 173.6988 | 21.5  |
| 173.7338 | 27    |
| 173.7675 | 23.25 |
| 173.805  | 30.75 |
| 173.8363 | 21    |
| 173.8675 | 27    |
| 173.9013 | 18.25 |
| 173.9338 | 28.25 |
| 173.9675 | 20    |
| 174      | 25.75 |
| 174.0338 | 24.75 |
| 174.0688 | 29    |
| 174.1038 | 20.5  |
| 174.135  | 27.75 |
| 174.1663 | 26.75 |
| 174.1988 | 31.5  |
| 174.2338 | 23.75 |
| 174.2675 | 31.5  |
| 174.305  | 26.5  |
| 174.3363 | 24.5  |
| 174.3675 | 26.25 |
| 174.4013 | 28.75 |
| 174.4338 | 27    |
| 174.4675 | 25.25 |
| 174.5025 | 24.5  |
| 174.5338 | 26.75 |
| 174.5688 | 26.5  |
| 174.6038 | 22    |
| 174.6375 | 27    |
| 174.665  | 27    |
| 174.6975 | 23.5  |
| 174.7338 | 22.5  |
| 174.7675 | 19.75 |
| 174.805  | 22    |
| 174.8363 | 18.75 |
| 174.8675 | 21.5  |
| 174.9013 | 21.5  |
| 174.9338 | 18.25 |
| 174.9675 | 25.25 |
| 175.0025 | 21.5  |

|          |       |
|----------|-------|
| 174.9963 | 13.25 |
| 175.0275 | 11.25 |
| 175.0613 | 11.25 |
| 175.095  | 15.75 |
| 175.13   | 12    |
| 175.1625 | 14.5  |
| 175.195  | 14.75 |
| 175.23   | 11.75 |
| 175.2625 | 15.5  |
| 175.2963 | 14    |
| 175.3288 | 12.5  |
| 175.3613 | 14.75 |
| 175.3938 | 16.5  |
| 175.4288 | 12.5  |
| 175.4638 | 17    |
| 175.4963 | 17.25 |
| 175.5275 | 12.5  |
| 175.5613 | 14    |
| 175.595  | 15.5  |
| 175.63   | 12.25 |
| 175.665  | 14.5  |
| 175.695  | 14.5  |
| 175.73   | 15    |
| 175.7625 | 13    |
| 175.7963 | 14    |
| 175.8288 | 10.5  |
| 175.8613 | 16.75 |
| 175.8938 | 15.5  |
| 175.9288 | 12.25 |
| 175.9638 | 11.75 |
| 175.9963 | 12.75 |
| 176.0275 | 12    |
| 176.0613 | 11.25 |
| 176.095  | 13    |
| 176.13   | 11.75 |
| 176.165  | 12    |
| 176.195  | 13.25 |
| 176.23   | 11.5  |
| 176.2625 | 11.25 |
| 176.2963 | 10.5  |
| 176.3288 | 7.75  |
| 176.3625 | 12    |
| 176.3938 | 12.25 |
| 176.4288 | 13.25 |
| 176.4638 | 13.25 |
| 176.4963 | 13.5  |
| 176.5288 | 10.75 |
| 176.5613 | 11    |
| 176.595  | 11.5  |
| 176.63   | 12    |

|          |       |
|----------|-------|
| 175.0388 | 19.25 |
| 175.0725 | 16.25 |
| 175.105  | 21.5  |
| 175.1375 | 18.75 |
| 175.1675 | 22    |
| 175.2013 | 23    |
| 175.2338 | 21.5  |
| 175.2713 | 23.5  |
| 175.3075 | 23    |
| 175.3388 | 21.75 |
| 175.37   | 23.75 |
| 175.4025 | 22.25 |
| 175.4325 | 23.5  |
| 175.4688 | 25.25 |
| 175.505  | 23.25 |
| 175.54   | 20    |
| 175.57   | 22    |
| 175.605  | 21.75 |
| 175.6375 | 21.25 |
| 175.67   | 22    |
| 175.7    | 25.75 |
| 175.735  | 27    |
| 175.7713 | 20.75 |
| 175.8075 | 22    |
| 175.8388 | 22.5  |
| 175.87   | 25.25 |
| 175.9025 | 23.5  |
| 175.9325 | 25.75 |
| 175.9688 | 24.25 |
| 176.005  | 22.75 |
| 176.04   | 23.75 |
| 176.07   | 19    |
| 176.105  | 26.25 |
| 176.1375 | 25    |
| 176.17   | 27.75 |
| 176.2025 | 20.5  |
| 176.2375 | 24    |
| 176.28   | 25.25 |
| 176.31   | 26.25 |
| 176.3413 | 23    |
| 176.3725 | 24    |
| 176.4038 | 25.75 |
| 176.4338 | 22.5  |
| 176.47   | 27    |
| 176.5088 | 26.25 |
| 176.5413 | 26    |
| 176.5713 | 21.5  |
| 176.6063 | 21.5  |
| 176.64   | 22.25 |
| 176.67   | 20.5  |

|          |       |          |       |
|----------|-------|----------|-------|
| 176.665  | 11.75 | 176.7025 | 19.25 |
| 176.695  | 14.75 | 176.7375 | 18    |
| 176.73   | 12.25 | 176.7763 | 22.5  |
| 176.7625 | 11.25 | 176.81   | 24.25 |
| 176.7963 | 13    | 176.8413 | 25    |
| 176.8288 | 10.25 | 176.875  | 23.5  |
| 176.8625 | 16    | 176.9038 | 26.5  |
| 176.8938 | 13.75 | 176.9338 | 26.25 |
| 176.9288 | 12.25 | 176.9725 | 24.75 |
| 176.9613 | 14    | 177.01   | 24.25 |
| 176.9963 | 11    | 177.0413 | 28.5  |
| 177.0288 | 12.25 | 177.0713 | 18.75 |
| 177.0613 | 12.75 | 177.1063 | 24.5  |
| 177.095  | 13.75 | 177.14   | 23.25 |
| 177.13   | 13.75 | 177.17   | 21.75 |
| 177.165  | 9.25  | 177.2025 | 23.25 |
| 177.195  | 12.75 | 177.2388 | 18.5  |
| 177.23   | 8.5   | 177.2763 | 23.75 |
| 177.2625 | 15    | 177.31   | 21    |
| 177.2963 | 10.25 | 177.3413 | 20.25 |
| 177.33   | 11.5  | 177.3725 | 21.75 |
| 177.3625 | 11.25 | 177.4038 | 22    |
| 177.3963 | 11    | 177.4338 | 25.5  |
| 177.4288 | 11.5  | 177.47   | 21.75 |
| 177.4638 | 10    | 177.51   | 23    |
| 177.4963 | 12.5  | 177.5413 | 22.5  |
| 177.5288 | 12    | 177.5713 | 23    |
| 177.5613 | 9.75  | 177.6063 | 22    |
| 177.595  | 12.75 | 177.64   | 22.25 |
| 177.63   | 8     | 177.67   | 24.75 |
| 177.665  | 8     | 177.7025 | 19    |
| 177.695  | 9.25  | 177.7388 | 25    |
| 177.73   | 10.25 | 177.7763 | 26    |
| 177.7625 | 9.25  | 177.81   | 21    |
| 177.7963 | 8.5   | 177.8413 | 17.75 |
| 177.83   | 8.25  | 177.8725 | 21.25 |
| 177.8625 | 11.25 | 177.9038 | 21.75 |
| 177.8938 | 6.5   | 177.9338 | 21.5  |
| 177.9288 | 7.75  | 177.97   | 23.25 |
| 177.9613 | 9.25  | 178.01   | 21    |
| 177.9963 | 10    | 178.0413 | 24.25 |
| 178.0288 | 8.5   | 178.0713 | 18    |
| 178.0613 | 9     | 178.1063 | 22.5  |
| 178.0975 | 10.25 | 178.14   | 25    |
| 178.13   | 10.75 | 178.17   | 23.25 |
| 178.165  | 10    | 178.2025 | 22.25 |
| 178.195  | 9.5   | 178.2388 | 22.5  |
| 178.23   | 10.25 | 178.2763 | 22    |
| 178.2625 | 11    | 178.31   | 24.5  |
| 178.2963 | 10.75 | 178.3413 | 22.5  |

|          |       |          |       |
|----------|-------|----------|-------|
| 178.33   | 13.5  | 178.3725 | 20.75 |
| 178.3625 | 12    | 178.4038 | 28.75 |
| 178.3938 | 10.5  | 178.4338 | 25.5  |
| 178.4288 | 10.25 | 178.4725 | 24.75 |
| 178.4613 | 12.25 | 178.5088 | 22.5  |
| 178.4963 | 8.5   | 178.5413 | 20    |
| 178.5288 | 11.25 | 178.5713 | 22.25 |
| 178.5613 | 12.25 | 178.6063 | 20    |
| 178.5975 | 12.5  | 178.64   | 19.75 |
| 178.63   | 10.25 | 178.67   | 25    |
| 178.665  | 8.5   | 178.7075 | 17.75 |
| 178.695  | 9.75  | 178.7388 | 20.5  |
| 178.73   | 12.75 | 178.7763 | 20.5  |
| 178.7625 | 11.25 | 178.81   | 21.5  |
| 178.7963 | 8     | 178.8413 | 21.75 |
| 178.83   | 9     | 178.8725 | 25.25 |
| 178.8625 | 11.25 | 178.9038 | 19.75 |
| 178.8938 | 9     | 178.9338 | 22    |
| 178.9288 | 7.5   | 178.9725 | 20.75 |
| 178.9613 | 12.75 | 179.0113 | 24.75 |
| 178.9963 | 9.5   | 179.0438 | 23    |
| 179.0288 | 9     | 179.0738 | 22.25 |
| 179.0613 | 9.25  | 179.1075 | 19.75 |
| 179.0975 | 9     | 179.1413 | 20    |
| 179.13   | 8.5   | 179.1713 | 21.5  |
| 179.165  | 8.25  | 179.2075 | 24.5  |
| 179.1963 | 9     | 179.2425 | 20.25 |
| 179.23   | 9     | 179.2775 | 20.25 |
| 179.2625 | 10.75 | 179.3113 | 24.5  |
| 179.2963 | 8.25  | 179.3438 | 24    |
| 179.3313 | 9.5   | 179.375  | 25.5  |
| 179.3625 | 11.5  | 179.4063 | 21.75 |
| 179.395  | 10.75 | 179.4363 | 24    |
| 179.4288 | 10.5  | 179.4775 | 22.25 |
| 179.4613 | 11.75 | 179.5113 | 23    |
| 179.4963 | 9.25  | 179.5438 | 24    |
| 179.5288 | 11.5  | 179.575  | 22.25 |
| 179.5613 | 8.75  | 179.6075 | 22.25 |
| 179.5975 | 9     | 179.6413 | 27.25 |
| 179.63   | 8.25  | 179.6713 | 24    |
| 179.6625 | 9     | 179.7088 | 29.25 |
| 179.6963 | 10.25 | 179.745  | 22.25 |
| 179.73   | 7.5   | 179.7775 | 22.75 |
| 179.765  | 12.25 | 179.8113 | 24    |
| 179.7963 | 10    | 179.8438 | 24    |
| 179.8313 | 9.25  | 179.875  | 22    |
| 179.8625 | 13.5  | 179.9063 | 22.5  |
| 179.895  | 11.5  | 179.9363 | 24.5  |
| 179.9288 | 10.25 | 179.975  | 26.75 |
| 179.9613 | 7.25  | 180.0138 | 23.25 |

|          |       |
|----------|-------|
| 179.9963 | 12    |
| 180.0288 | 12    |
| 180.0613 | 11.25 |
| 180.0975 | 10    |
| 180.13   | 9.25  |
| 180.1625 | 10.25 |
| 180.1963 | 16    |
| 180.23   | 12.5  |
| 180.265  | 9.5   |
| 180.2963 | 10.25 |
| 180.3313 | 8     |
| 180.3625 | 11    |
| 180.395  | 12.25 |
| 180.4288 | 9.25  |
| 180.4613 | 9.5   |
| 180.4963 | 11.25 |
| 180.5288 | 12.25 |
| 180.5663 | 14.75 |
| 180.5975 | 13    |
| 180.63   | 10.25 |
| 180.6638 | 12.75 |
| 180.6963 | 14.75 |
| 180.73   | 15    |
| 180.765  | 12.25 |
| 180.7963 | 14.25 |
| 180.8313 | 11.75 |
| 180.8625 | 11.75 |
| 180.895  | 11.5  |
| 180.9288 | 11.75 |
| 180.9613 | 15.5  |
| 180.9963 | 11.25 |
| 181.0288 | 10    |
| 181.0663 | 14.75 |
| 181.0975 | 12.25 |
| 181.1313 | 11    |
| 181.1625 | 11.25 |
| 181.1963 | 10    |
| 181.23   | 15.75 |
| 181.265  | 10.75 |
| 181.2963 | 12.75 |
| 181.3313 | 12.25 |
| 181.3625 | 9.75  |
| 181.395  | 10.5  |
| 181.4288 | 13    |
| 181.4625 | 12.25 |
| 181.4988 | 13.5  |
| 181.5313 | 14.25 |
| 181.5675 | 8     |
| 181.5988 | 15.75 |
| 181.635  | 12.75 |

|          |       |
|----------|-------|
| 180.0425 | 22.5  |
| 180.0738 | 22.5  |
| 180.1075 | 20.75 |
| 180.1413 | 20.25 |
| 180.1713 | 20.25 |
| 180.2088 | 22.75 |
| 180.2425 | 23    |
| 180.2775 | 21    |
| 180.3113 | 21.5  |
| 180.3438 | 22.5  |
| 180.375  | 22.5  |
| 180.4063 | 18.25 |
| 180.4388 | 22.5  |
| 180.475  | 23.5  |
| 180.5113 | 19.25 |
| 180.5425 | 22.5  |
| 180.5738 | 19.25 |
| 180.6075 | 18.75 |
| 180.6413 | 25.75 |
| 180.6713 | 23.75 |
| 180.7088 | 20.75 |
| 180.7425 | 24.5  |
| 180.7775 | 20.5  |
| 180.8113 | 21    |
| 180.8438 | 23.25 |
| 180.875  | 22.75 |
| 180.9063 | 24.5  |
| 180.9425 | 25.75 |
| 180.975  | 20.75 |
| 181.0113 | 21.5  |
| 181.0425 | 22.5  |
| 181.0738 | 22    |
| 181.1075 | 22.5  |
| 181.1413 | 22    |
| 181.1713 | 21    |
| 181.2063 | 24    |
| 181.2413 | 22.25 |
| 181.2775 | 23    |
| 181.3113 | 18.75 |
| 181.3438 | 22.75 |
| 181.375  | 20    |
| 181.4063 | 24    |
| 181.44   | 20.5  |
| 181.475  | 25.75 |
| 181.5113 | 23.5  |
| 181.5438 | 24    |
| 181.5738 | 20.5  |
| 181.6075 | 25.25 |
| 181.6413 | 18.75 |
| 181.6738 | 20    |

|          |       |          |       |
|----------|-------|----------|-------|
| 181.6663 | 12.5  | 181.7063 | 19.5  |
| 181.7    | 22    | 181.7413 | 21.5  |
| 181.735  | 13    | 181.7775 | 20.75 |
| 181.7675 | 11.75 | 181.8113 | 23.75 |
| 181.8013 | 15.75 | 181.8438 | 22    |
| 181.835  | 15    | 181.875  | 19.25 |
| 181.8675 | 13.75 | 181.9063 | 19    |
| 181.8988 | 16.25 | 181.94   | 20.5  |
| 181.9325 | 12.75 | 181.975  | 23.5  |
| 181.9663 | 13    | 182.0113 | 18.75 |
| 182.0013 | 12.75 | 182.0425 | 21.5  |
| 182.035  | 13.5  | 182.0738 | 19.75 |
| 182.07   | 15    | 182.1075 | 16.75 |
| 182.1013 | 16.25 | 182.1425 | 24    |
| 182.1363 | 13.75 | 182.175  | 22.75 |
| 182.1663 | 13.25 | 182.2063 | 21.5  |
| 182.2025 | 12.5  | 182.2413 | 19.25 |
| 182.235  | 15.5  | 182.2775 | 23.5  |
| 182.2675 | 14.25 | 182.3113 | 20.75 |
| 182.3013 | 12.25 | 182.3438 | 21.25 |
| 182.3375 | 14    | 182.375  | 14.75 |
| 182.3675 | 11.5  | 182.4063 | 22.25 |
| 182.3988 | 15.5  | 182.44   | 21.25 |
| 182.4313 | 15.5  | 182.475  | 23.75 |
| 182.4663 | 10.5  | 182.5113 | 25.5  |
| 182.5013 | 13.75 | 182.5425 | 29.75 |
| 182.535  | 14.75 | 182.5738 | 23    |
| 182.57   | 11.75 | 182.6075 | 23    |
| 182.6013 | 13.75 | 182.6413 | 21.75 |
| 182.6363 | 10.25 | 182.675  | 21    |
| 182.6663 | 11.75 | 182.7063 | 17.75 |
| 182.7025 | 11.25 | 182.7413 | 20.25 |
| 182.735  | 9.75  | 182.7775 | 22.75 |
| 182.7675 | 10.25 | 182.8125 | 22.5  |
| 182.8038 | 11.5  | 182.8425 | 20.75 |
| 182.835  | 6.75  | 182.875  | 22.25 |
| 182.8675 | 11.25 | 182.9063 | 20    |
| 182.8988 | 14    | 182.94   | 21.25 |
| 182.9313 | 14.25 | 182.975  | 20.5  |
| 182.9663 | 14.5  | 183.0138 | 22    |
| 183.0013 | 12.5  | 183.0425 | 25    |
| 183.035  | 12    | 183.0738 | 28.5  |
| 183.07   | 12.25 | 183.1075 | 23    |
| 183.1013 | 13    | 183.1413 | 21.75 |
| 183.1363 | 12.5  | 183.175  | 21.5  |
| 183.1663 | 14.75 | 183.2063 | 23    |
| 183.2025 | 11.25 | 183.2413 | 20.25 |
| 183.235  | 13.75 | 183.2775 | 22    |
| 183.2675 | 14.25 | 183.3113 | 20.5  |
| 183.3038 | 10.5  | 183.3425 | 16    |

|          |       |          |       |
|----------|-------|----------|-------|
| 183.335  | 16.5  | 183.375  | 15.25 |
| 183.3688 | 14.75 | 183.41   | 18.25 |
| 183.3988 | 14.25 | 183.44   | 19.25 |
| 183.4313 | 13.5  | 183.475  | 20    |
| 183.4663 | 11    | 183.5113 | 20.25 |
| 183.5013 | 10    | 183.5425 | 16.25 |
| 183.535  | 14.5  | 183.5738 | 18    |
| 183.57   | 10.75 | 183.6075 | 15.75 |
| 183.6013 | 13    | 183.6413 | 15.5  |
| 183.6363 | 14.75 | 183.675  | 20.5  |
| 183.6663 | 15    | 183.7063 | 20.25 |
| 183.7025 | 13.25 | 183.7413 | 18.25 |
| 183.735  | 10.75 | 183.7775 | 25.5  |
| 183.77   | 13.25 | 183.8088 | 21.75 |
| 183.8038 | 12.75 | 183.8425 | 22.25 |
| 183.835  | 14.25 | 183.875  | 19.75 |
| 183.8688 | 14    | 183.91   | 21.75 |
| 183.8988 | 15    | 183.94   | 22.75 |
| 183.9313 | 14    | 183.975  | 22    |
| 183.9663 | 14.5  | 184.0125 | 23.25 |
| 184.0013 | 10.25 | 184.0425 | 25.25 |
| 184.0375 | 11.5  | 184.0738 | 24.75 |
| 184.07   | 11.5  | 184.1075 | 24.5  |
| 184.1013 | 12.75 | 184.1413 | 23.75 |
| 184.1363 | 10.25 | 184.175  | 21.25 |
| 184.1663 | 10.75 | 184.2063 | 23.5  |
| 184.2    | 12.25 | 184.24   | 20.5  |
| 184.235  | 13    | 184.2775 | 20.25 |
| 184.27   | 11.75 | 184.3088 | 18.75 |
| 184.3038 | 13.5  | 184.3425 | 16.5  |
| 184.335  | 9.5   | 184.375  | 19.25 |
| 184.3688 | 13.75 | 184.41   | 14    |
| 184.3988 | 13    | 184.4425 | 16.25 |
| 184.4338 | 12.5  | 184.475  | 18.25 |
| 184.4663 | 10.75 | 184.5125 | 14.75 |
| 184.5013 | 13    | 184.5425 | 17.25 |
| 184.5388 | 13.25 | 184.5738 | 22.5  |
| 184.57   | 14    | 184.6075 | 20    |
| 184.6013 | 12.75 | 184.6413 | 18.75 |
| 184.6363 | 13.5  | 184.675  | 22.75 |
| 184.6663 | 12    | 184.7063 | 23    |
| 184.7    | 13.5  | 184.74   | 18.25 |
| 184.735  | 14.25 | 184.7775 | 15.75 |
| 184.77   | 12    | 184.8088 | 21    |
| 184.8038 | 12.75 | 184.8425 | 18.25 |
| 184.835  | 14.25 | 184.875  | 19.25 |
| 184.8688 | 18    | 184.91   | 21.5  |
| 184.8988 | 14.25 | 184.94   | 23.75 |
| 184.9338 | 14.75 | 184.975  | 21.25 |
| 184.9688 | 14    | 185.0125 | 20.25 |

|          |       |
|----------|-------|
| 185.005  | 14.5  |
| 185.0413 | 16.25 |
| 185.0725 | 15.5  |
| 185.1063 | 13.25 |
| 185.1375 | 14.25 |
| 185.1675 | 12.25 |
| 185.2013 | 16.5  |
| 185.2375 | 15.5  |
| 185.2713 | 11.75 |
| 185.305  | 13.25 |
| 185.3363 | 11.25 |
| 185.3713 | 13.75 |
| 185.4013 | 12.25 |
| 185.4375 | 16.75 |
| 185.4688 | 13.25 |
| 185.5063 | 14.25 |
| 185.5413 | 15.25 |
| 185.5725 | 15.5  |
| 185.6063 | 16.75 |
| 185.6375 | 12.5  |
| 185.6675 | 11.5  |
| 185.7013 | 10.25 |
| 185.7375 | 10    |
| 185.7713 | 13.75 |
| 185.805  | 10.25 |
| 185.8363 | 10    |
| 185.8713 | 13.75 |
| 185.9013 | 11    |
| 185.9375 | 12    |
| 185.9688 | 11.5  |
| 186.0063 | 11.5  |
| 186.0413 | 12.25 |
| 186.0725 | 8.5   |
| 186.1063 | 7.5   |
| 186.1375 | 9.5   |
| 186.1675 | 12    |
| 186.2013 | 12.25 |
| 186.2375 | 15.5  |
| 186.2713 | 15.5  |
| 186.305  | 10.25 |
| 186.3363 | 16.25 |
| 186.3713 | 13.25 |
| 186.4013 | 13    |
| 186.4375 | 15    |
| 186.47   | 19.75 |
| 186.5063 | 12.5  |
| 186.5413 | 12    |
| 186.5725 | 11.5  |
| 186.6063 | 12.75 |
| 186.6375 | 13.5  |

|          |       |
|----------|-------|
| 185.0425 | 16    |
| 185.0738 | 19.25 |
| 185.1075 | 21.75 |
| 185.145  | 16    |
| 185.175  | 22.25 |
| 185.2063 | 18    |
| 185.24   | 20.25 |
| 185.2775 | 21.25 |
| 185.3088 | 18.75 |
| 185.3425 | 23.75 |
| 185.375  | 23.75 |
| 185.41   | 21.5  |
| 185.44   | 20.5  |
| 185.475  | 16    |
| 185.51   | 22    |
| 185.5425 | 21.25 |
| 185.5738 | 22.5  |
| 185.6075 | 17.5  |
| 185.645  | 16.75 |
| 185.675  | 19    |
| 185.7063 | 26.25 |
| 185.74   | 13.5  |
| 185.7775 | 19    |
| 185.8088 | 19.75 |
| 185.8425 | 16.5  |
| 185.875  | 19    |
| 185.91   | 20.5  |
| 185.94   | 20.5  |
| 185.975  | 18.5  |
| 186.01   | 18    |
| 186.0425 | 19.25 |
| 186.0738 | 19    |
| 186.1075 | 18    |
| 186.145  | 16.75 |
| 186.175  | 22.5  |
| 186.2063 | 18    |
| 186.24   | 18    |
| 186.2775 | 15.5  |
| 186.3088 | 19.25 |
| 186.3425 | 18.25 |
| 186.375  | 20.25 |
| 186.4125 | 22    |
| 186.44   | 23.25 |
| 186.475  | 20.25 |
| 186.51   | 22.75 |
| 186.5425 | 21.5  |
| 186.5738 | 19    |
| 186.6075 | 17.75 |
| 186.645  | 20.5  |
| 186.675  | 16.75 |



|          |       |          |       |
|----------|-------|----------|-------|
| 186.6675 | 11    | 186.7063 | 21.25 |
| 186.7013 | 11.5  | 186.74   | 17.25 |
| 186.7375 | 8     | 186.7763 | 15.5  |
| 186.7738 | 13.25 | 186.8088 | 16.75 |
| 186.805  | 8.75  | 186.8425 | 19    |
| 186.8363 | 8.5   | 186.875  | 16.75 |
| 186.8713 | 7.75  | 186.91   | 19.75 |
| 186.9013 | 11.5  | 186.94   | 19    |
| 186.9375 | 10    | 186.975  | 17    |
| 186.9675 | 9.5   | 187.01   | 17.5  |
| 187.0063 | 7.75  | 187.0425 | 16.5  |
| 187.0413 | 11.25 | 187.0738 | 17.5  |
| 187.0725 | 12    | 187.11   | 20.25 |
| 187.1063 | 10    | 187.145  | 21    |
| 187.1375 | 10.25 | 187.175  | 19    |
| 187.1675 | 12    | 187.2063 | 19.5  |
| 187.2013 | 12.25 | 187.24   | 18    |
| 187.2375 | 8.25  | 187.2763 | 19.5  |
| 187.2738 | 14.5  | 187.3088 | 19.5  |
| 187.305  | 10    | 187.3425 | 20.75 |
| 187.3388 | 12.25 | 187.3788 | 20    |
| 187.3713 | 6.5   | 187.41   | 23.25 |
| 187.4013 | 9.5   | 187.44   | 22.25 |
| 187.4375 | 11    | 187.475  | 20.5  |
| 187.4675 | 12.25 | 187.51   | 22.75 |
| 187.5063 | 14.5  | 187.5425 | 24    |
| 187.5413 | 8.75  | 187.5725 | 23.5  |
| 187.5725 | 10.75 | 187.6075 | 19    |
| 187.6063 | 9.5   | 187.645  | 25.5  |
| 187.64   | 8.75  | 187.675  | 20.5  |
| 187.6675 | 8     | 187.7063 | 23.25 |
| 187.7013 | 10.75 | 187.74   | 24.75 |
| 187.74   | 10.5  | 187.7763 | 25.5  |
| 187.7738 | 10.5  | 187.8088 | 21.5  |
| 187.805  | 7     | 187.8425 | 20.75 |
| 187.8388 | 10.25 | 187.8788 | 25    |
| 187.8713 | 8.5   | 187.91   | 24.25 |
| 187.9013 | 10.25 | 187.9425 | 26    |
| 187.9375 | 7.75  | 187.975  | 23.25 |
| 187.9675 | 8     | 188.01   | 20.5  |
| 188.0063 | 8     | 188.04   | 22.75 |
| 188.0413 | 10    | 188.0725 | 23.5  |
| 188.0725 | 11.75 | 188.1075 | 23.25 |
| 188.1063 | 9.75  | 188.145  | 24.75 |
| 188.1375 | 10.5  | 188.175  | 21.5  |
| 188.17   | 9     | 188.2063 | 22.25 |
| 188.2013 | 14.5  | 188.24   | 21.75 |
| 188.2375 | 12    | 188.2763 | 23.25 |
| 188.2738 | 9.25  | 188.3088 | 20    |
| 188.305  | 9.75  | 188.3425 | 23.75 |

|          |       |          |       |
|----------|-------|----------|-------|
| 188.3388 | 11    | 188.3788 | 23.25 |
| 188.3713 | 12.75 | 188.41   | 27    |
| 188.4013 | 15.25 | 188.44   | 31    |
| 188.4375 | 11.5  | 188.475  | 29    |
| 188.4675 | 10.75 | 188.51   | 31    |
| 188.5063 | 9.5   | 188.54   | 26.25 |
| 188.5413 | 10    | 188.5725 | 24.75 |
| 188.5725 | 10    | 188.6075 | 23.5  |
| 188.6063 | 9.5   | 188.645  | 18    |
| 188.6375 | 11.75 | 188.675  | 29    |
| 188.6725 | 10    | 188.7063 | 26    |
| 188.7013 | 9.5   | 188.7425 | 26.5  |
| 188.7375 | 10.25 | 188.7763 | 27.75 |
| 188.7738 | 11    | 188.8088 | 27    |
| 188.805  | 10    | 188.8425 | 27.5  |
| 188.8388 | 9.75  | 188.8788 | 20.5  |
| 188.8713 | 9.5   | 188.91   | 25.25 |
| 188.9013 | 8.75  | 188.94   | 23.25 |
| 188.9375 | 11    | 188.975  | 27.25 |
| 188.9675 | 11    | 189.01   | 23.5  |
| 189.0075 | 7.75  | 189.04   | 25    |
| 189.0413 | 12.25 | 189.0725 | 24    |
| 189.0725 | 11.25 | 189.1075 | 23.75 |
| 189.1063 | 9.75  | 189.145  | 26.75 |
| 189.1375 | 6     | 189.175  | 23.25 |
| 189.17   | 11.5  | 189.2063 | 23.5  |
| 189.2013 | 8.5   | 189.2425 | 24.75 |
| 189.2375 | 4     | 189.2763 | 19    |
| 189.2763 | 9.75  | 189.3075 | 18.75 |
| 189.3063 | 7.75  | 189.3425 | 22.75 |
| 189.34   | 7.75  | 189.3788 | 20    |
| 189.3738 | 8     | 189.41   | 19.25 |
| 189.4038 | 8.75  | 189.44   | 19.5  |
| 189.44   | 10.5  | 189.475  | 20.5  |
| 189.4725 | 8.5   | 189.51   | 15.75 |
| 189.51   | 7     | 189.54   | 23.75 |
| 189.5463 | 6.5   | 189.5725 | 18.25 |
| 189.575  | 7     | 189.61   | 18.25 |
| 189.6088 | 9.25  | 189.645  | 20.75 |
| 189.6388 | 8.75  | 189.675  | 17.75 |
| 189.6725 | 8.75  | 189.7063 | 22.5  |
| 189.705  | 10    | 189.7425 | 21.75 |
| 189.7388 | 10.5  | 189.7763 | 23.75 |
| 189.7763 | 9.25  | 189.8075 | 17    |
| 189.8063 | 8.5   | 189.8425 | 21    |
| 189.84   | 11    | 189.8788 | 25.75 |
| 189.8738 | 9.25  | 189.91   | 26.75 |
| 189.9038 | 9.5   | 189.94   | 21.25 |
| 189.94   | 8.75  | 189.975  | 23.5  |
| 189.9725 | 8.25  | 190.01   | 22.25 |

|          |       |          |       |
|----------|-------|----------|-------|
| 190.0088 | 8.5   | 190.04   | 24.25 |
| 190.0438 | 9.5   | 190.0725 | 20    |
| 190.075  | 8.75  | 190.11   | 17.25 |
| 190.1088 | 12    | 190.145  | 20.25 |
| 190.1388 | 12.25 | 190.175  | 19.5  |
| 190.1725 | 10.5  | 190.2063 | 21.5  |
| 190.205  | 7.5   | 190.2425 | 20.5  |
| 190.2388 | 13.25 | 190.2763 | 17.5  |
| 190.2763 | 12.5  | 190.3075 | 15    |
| 190.3063 | 11.5  | 190.3425 | 18.75 |
| 190.34   | 10.5  | 190.3788 | 15.5  |
| 190.3738 | 10.75 | 190.41   | 19.25 |
| 190.4038 | 13.25 | 190.44   | 20    |
| 190.44   | 10.25 | 190.475  | 21.25 |
| 190.4725 | 10.75 | 190.51   | 20.5  |
| 190.5063 | 13.75 | 190.54   | 19.75 |
| 190.5438 | 13.25 | 190.57   | 22.25 |
| 190.575  | 10.5  | 190.6075 | 20.5  |
| 190.6088 | 11.5  | 190.645  | 20.75 |
| 190.6388 | 9.5   | 190.675  | 20    |
| 190.6725 | 9.75  | 190.7088 | 20    |
| 190.705  | 12.5  | 190.7425 | 20.25 |
| 190.7388 | 12    | 190.7763 | 22    |
| 190.7763 | 10.5  | 190.8075 | 21.5  |
| 190.8063 | 13.25 | 190.8425 | 21    |
| 190.84   | 12.75 | 190.8788 | 20    |
| 190.875  | 12.5  | 190.91   | 19.5  |
| 190.905  | 12.25 | 190.94   | 21.75 |
| 190.94   | 12    | 190.9725 | 26.5  |
| 190.9725 | 13.5  | 191.01   | 24    |
| 191.0063 | 13.25 | 191.04   | 21    |
| 191.0438 | 15.25 | 191.07   | 26.5  |
| 191.0763 | 13.25 | 191.11   | 24.25 |
| 191.1088 | 15.5  | 191.145  | 21.25 |
| 191.1388 | 14.25 | 191.175  | 21    |
| 191.1725 | 10.5  | 191.2063 | 23.25 |
| 191.2075 | 13.5  | 191.2425 | 20.25 |
| 191.2413 | 12.75 | 191.2763 | 18.25 |
| 191.2763 | 12.75 | 191.3075 | 26.5  |
| 191.3063 | 12.75 | 191.3425 | 23.75 |
| 191.34   | 13.5  | 191.3788 | 22    |
| 191.3738 | 12.75 | 191.41   | 23.5  |
| 191.405  | 9.5   | 191.44   | 24.5  |
| 191.44   | 12.25 | 191.475  | 25.25 |
| 191.4725 | 9.5   | 191.51   | 19.75 |
| 191.5063 | 11.25 | 191.54   | 19    |
| 191.5438 | 13.25 | 191.57   | 16.25 |
| 191.5763 | 13    | 191.61   | 22.5  |
| 191.6088 | 10.25 | 191.645  | 23.5  |
| 191.6388 | 10.25 | 191.675  | 20    |

|          |       |
|----------|-------|
| 191.6725 | 18    |
| 191.705  | 9.75  |
| 191.7413 | 12    |
| 191.7763 | 11.25 |
| 191.8063 | 12.75 |
| 191.84   | 12.25 |
| 191.8738 | 17.5  |
| 191.905  | 13.25 |
| 191.9413 | 10    |
| 191.9725 | 14.25 |
| 192.01   | 9.5   |
| 192.0438 | 11.25 |
| 192.0763 | 13.75 |
| 192.1088 | 14.25 |
| 192.1388 | 16.25 |
| 192.1725 | 13    |
| 192.205  | 11    |
| 192.2413 | 12.5  |
| 192.2738 | 12.25 |
| 192.3063 | 8.25  |
| 192.34   | 10.25 |
| 192.3738 | 13.5  |
| 192.405  | 10.25 |
| 192.4413 | 12.25 |
| 192.4725 | 10.25 |
| 192.5063 | 11.25 |
| 192.5438 | 11.25 |
| 192.5763 | 12    |
| 192.6088 | 10.75 |
| 192.6388 | 11.25 |
| 192.6725 | 10.75 |
| 192.705  | 11.25 |
| 192.7413 | 8.5   |
| 192.7738 | 10.75 |
| 192.8063 | 9.5   |
| 192.84   | 7.5   |
| 192.8738 | 11.5  |
| 192.905  | 11.5  |
| 192.9413 | 13.25 |
| 192.9725 | 14.75 |
| 193.0075 | 10.5  |
| 193.0438 | 10    |
| 193.0763 | 11.25 |
| 193.1088 | 8     |
| 193.1388 | 12    |
| 193.1725 | 11    |
| 193.205  | 8.5   |
| 193.2413 | 8.5   |
| 193.2738 | 11    |
| 193.3063 | 9.75  |

|          |       |
|----------|-------|
| 191.7063 | 21    |
| 191.7425 | 19    |
| 191.7763 | 23.25 |
| 191.8075 | 20.5  |
| 191.8438 | 15.5  |
| 191.8788 | 22.75 |
| 191.91   | 19.75 |
| 191.94   | 22.25 |
| 191.9738 | 19    |
| 192.01   | 21.75 |
| 192.04   | 19.25 |
| 192.07   | 17.5  |
| 192.11   | 17.75 |
| 192.145  | 16.75 |
| 192.175  | 15.5  |
| 192.2063 | 14.75 |
| 192.2425 | 23.75 |
| 192.2763 | 20    |
| 192.3075 | 15.5  |
| 192.3413 | 21.5  |
| 192.3788 | 20.5  |
| 192.41   | 22.25 |
| 192.44   | 20.75 |
| 192.4738 | 18.25 |
| 192.51   | 20    |
| 192.54   | 24.5  |
| 192.57   | 23.5  |
| 192.61   | 20.75 |
| 192.645  | 23.5  |
| 192.675  | 23    |
| 192.7063 | 19.5  |
| 192.7425 | 21    |
| 192.7763 | 21.5  |
| 192.8075 | 22    |
| 192.8413 | 25.5  |
| 192.8788 | 22.25 |
| 192.91   | 17.5  |
| 192.9425 | 24.75 |
| 192.9738 | 24.25 |
| 193.01   | 20.25 |
| 193.04   | 22.75 |
| 193.07   | 22.25 |
| 193.11   | 26.75 |
| 193.145  | 21.75 |
| 193.175  | 21    |
| 193.2063 | 22.75 |
| 193.2425 | 19.75 |
| 193.2763 | 20.25 |
| 193.3075 | 20.5  |
| 193.3413 | 20.75 |

|          |       |          |       |
|----------|-------|----------|-------|
| 193.34   | 9.25  | 193.3788 | 20.5  |
| 193.3738 | 10    | 193.41   | 22    |
| 193.405  | 11.5  | 193.44   | 21    |
| 193.4413 | 9.25  | 193.4738 | 15.25 |
| 193.4725 | 9.25  | 193.51   | 16.25 |
| 193.5063 | 9.75  | 193.54   | 16.5  |
| 193.545  | 8     | 193.57   | 13.75 |
| 193.5763 | 12.25 | 193.6088 | 17.5  |
| 193.6088 | 10.75 | 193.645  | 18.25 |
| 193.6413 | 10    | 193.675  | 19.5  |
| 193.6725 | 12.25 | 193.7063 | 21    |
| 193.705  | 9.5   | 193.74   | 21.5  |
| 193.7413 | 8     | 193.7763 | 22.5  |
| 193.7738 | 10    | 193.8075 | 22.25 |
| 193.8063 | 10.5  | 193.8388 | 23    |
| 193.84   | 7     | 193.8788 | 21.5  |
| 193.8738 | 9.25  | 193.91   | 22    |
| 193.905  | 7.25  | 193.94   | 19.5  |
| 193.9413 | 9.25  | 193.9738 | 21    |
| 193.9738 | 10.5  | 194.01   | 23.75 |
| 194.0063 | 9.25  | 194.04   | 21.75 |
| 194.0438 | 7.75  | 194.0725 | 23.5  |
| 194.0763 | 10.25 | 194.1088 | 18.25 |
| 194.1088 | 11.75 | 194.145  | 21.75 |
| 194.1413 | 8.5   | 194.175  | 17.5  |
| 194.1725 | 11    | 194.2063 | 26    |
| 194.205  | 9.75  | 194.2425 | 18.75 |
| 194.2413 | 12.5  | 194.2763 | 19.25 |
| 194.2738 | 7.5   | 194.3075 | 23.5  |
| 194.3063 | 11.25 | 194.3388 | 22    |
| 194.34   | 8.25  | 194.3788 | 22.5  |
| 194.3738 | 10.75 | 194.41   | 24.25 |
| 194.405  | 11.25 | 194.44   | 23.75 |
| 194.4413 | 8.5   | 194.4738 | 22.25 |
| 194.4738 | 9.75  | 194.51   | 22.5  |
| 194.5063 | 10.25 | 194.54   | 20.75 |
| 194.5438 | 5.75  | 194.5725 | 22.25 |
| 194.5763 | 6.25  | 194.6088 | 23.25 |
| 194.6088 | 6     | 194.645  | 27.75 |
| 194.6413 | 8.5   | 194.675  | 28    |
| 194.6725 | 5.25  | 194.7088 | 29.25 |
| 194.705  | 9.75  | 194.74   | 25.25 |
| 194.7413 | 11.5  | 194.7763 | 28.25 |
| 194.7738 | 8     | 194.8075 | 23.5  |
| 194.8063 | 9     | 194.8388 | 22.25 |
| 194.84   | 12.75 | 194.8788 | 21.75 |
| 194.8738 | 12.25 | 194.91   | 18    |
| 194.905  | 13.25 | 194.94   | 23    |
| 194.9413 | 8.25  | 194.9738 | 16.75 |
| 194.9738 | 10    | 195.01   | 16.5  |

|          |       |          |       |
|----------|-------|----------|-------|
| 195.0088 | 13.5  | 195.04   | 18.25 |
| 195.0438 | 10.25 | 195.0725 | 21.75 |
| 195.0763 | 8.75  | 195.1088 | 18.75 |
| 195.1088 | 10.5  | 195.145  | 19    |
| 195.1413 | 11.25 | 195.175  | 24.75 |
| 195.175  | 11    | 195.2088 | 21.75 |
| 195.205  | 11    | 195.24   | 21.25 |
| 195.2413 | 12.75 | 195.2763 | 21.75 |
| 195.2738 | 10.75 | 195.3075 | 22.75 |
| 195.3063 | 12.5  | 195.3388 | 22.25 |
| 195.34   | 17.75 | 195.3763 | 20.75 |
| 195.3738 | 13    | 195.41   | 22.25 |
| 195.405  | 10.5  | 195.44   | 23.5  |
| 195.4413 | 12.5  | 195.4738 | 18    |
| 195.4738 | 13.5  | 195.51   | 22.5  |
| 195.5063 | 16    | 195.54   | 20.75 |
| 195.5413 | 9.75  | 195.5725 | 20.75 |
| 195.5763 | 13.75 | 195.6113 | 19.25 |
| 195.6088 | 13.75 | 195.645  | 18.75 |
| 195.6413 | 12    | 195.675  | 20.25 |
| 195.675  | 12.5  | 195.7088 | 18.5  |
| 195.705  | 13.25 | 195.74   | 21.25 |
| 195.7425 | 13    | 195.7763 | 22.25 |
| 195.7763 | 10.5  | 195.81   | 17.5  |
| 195.8088 | 10.75 | 195.8388 | 20    |
| 195.8413 | 15    | 195.8763 | 19.25 |
| 195.875  | 11.75 | 195.91   | 19.25 |
| 195.9063 | 13.25 | 195.9425 | 20.75 |
| 195.9425 | 13    | 195.9763 | 14.75 |
| 195.9763 | 14.5  | 196.0125 | 20.25 |
| 196.01   | 11.5  | 196.0425 | 16    |
| 196.0425 | 10.25 | 196.0775 | 17.25 |
| 196.0788 | 12.5  | 196.1088 | 18.5  |
| 196.1113 | 12    | 196.1463 | 19.25 |
| 196.1438 | 11    | 196.1763 | 17.25 |
| 196.1775 | 13.5  | 196.21   | 22.5  |
| 196.2075 | 14    | 196.2438 | 17    |
| 196.2425 | 10.25 | 196.2775 | 21    |
| 196.2763 | 10.25 | 196.31   | 18.75 |
| 196.3088 | 10.5  | 196.3425 | 23.25 |
| 196.3413 | 10    | 196.3788 | 18.75 |
| 196.3763 | 12.75 | 196.415  | 17.5  |
| 196.4063 | 10    | 196.445  | 21    |
| 196.4425 | 10.25 | 196.4763 | 19.75 |
| 196.4763 | 13.5  | 196.5125 | 21.75 |
| 196.5088 | 10.5  | 196.5425 | 22    |
| 196.5425 | 13.25 | 196.575  | 20.5  |
| 196.5788 | 10.5  | 196.6088 | 23    |
| 196.6113 | 12    | 196.6463 | 16.75 |
| 196.6438 | 13    | 196.6763 | 17.75 |

|          |       |          |       |
|----------|-------|----------|-------|
| 196.6775 | 11.75 | 196.71   | 17    |
| 196.71   | 11.75 | 196.7438 | 15.25 |
| 196.7425 | 11.75 | 196.7775 | 20.5  |
| 196.7763 | 12.5  | 196.81   | 18.25 |
| 196.8088 | 13.75 | 196.84   | 20.25 |
| 196.8413 | 12.25 | 196.8788 | 20.5  |
| 196.8763 | 11.5  | 196.9125 | 16.75 |
| 196.9063 | 12.75 | 196.9425 | 13.5  |
| 196.9425 | 11    | 196.9763 | 18.25 |
| 196.9763 | 10    | 197.0138 | 13    |
| 197.0088 | 7.25  | 197.0425 | 15.5  |
| 197.0425 | 12.25 | 197.075  | 16    |
| 197.0788 | 10.75 | 197.1088 | 19.25 |
| 197.1113 | 9.5   | 197.145  | 13.75 |
| 197.1438 | 12.5  | 197.1763 | 15.75 |
| 197.1775 | 15    | 197.21   | 19.25 |
| 197.21   | 15    | 197.2438 | 19    |
| 197.2425 | 12.75 | 197.2775 | 20.25 |
| 197.2763 | 12.25 | 197.3113 | 19    |
| 197.3088 | 13.75 | 197.34   | 18.5  |
| 197.3413 | 13.5  | 197.3788 | 19.25 |
| 197.3788 | 14    | 197.4125 | 15.75 |
| 197.4088 | 13.5  | 197.445  | 20    |
| 197.4463 | 15.75 | 197.4763 | 19.25 |
| 197.4788 | 11.5  | 197.5125 | 16    |
| 197.5113 | 13.75 | 197.5425 | 18.75 |
| 197.545  | 13.5  | 197.575  | 21.25 |
| 197.58   | 10.75 | 197.6088 | 17    |
| 197.6125 | 14    | 197.645  | 19.25 |
| 197.645  | 14.75 | 197.6763 | 19.25 |
| 197.68   | 12.75 | 197.71   | 20.25 |
| 197.7113 | 14.5  | 197.7438 | 25.75 |
| 197.7438 | 13.75 | 197.7775 | 16    |
| 197.7775 | 11.75 | 197.81   | 18.5  |
| 197.8113 | 11.25 | 197.84   | 19.5  |
| 197.8438 | 11.75 | 197.8788 | 19.5  |
| 197.8788 | 12    | 197.9125 | 20.5  |
| 197.9088 | 10.5  | 197.945  | 19.25 |
| 197.9463 | 9.25  | 197.9763 | 18.75 |
| 197.9788 | 16    | 198.0125 | 18    |
| 198.0113 | 7.5   | 198.0425 | 20    |
| 198.045  | 10.5  | 198.075  | 18.75 |
| 198.08   | 11    | 198.1075 | 14.75 |
| 198.1125 | 11.25 | 198.145  | 21.75 |
| 198.145  | 8.75  | 198.1763 | 21.75 |
| 198.18   | 9     | 198.21   | 24.25 |
| 198.2113 | 10.25 | 198.2438 | 21.25 |
| 198.2438 | 10.75 | 198.2775 | 23.5  |
| 198.2775 | 9.5   | 198.31   | 22.75 |
| 198.3113 | 10    | 198.34   | 17.75 |

|          |       |          |       |
|----------|-------|----------|-------|
| 198.3438 | 12    | 198.3788 | 21.75 |
| 198.3788 | 13.5  | 198.4125 | 17.75 |
| 198.4088 | 10.25 | 198.445  | 21.5  |
| 198.4463 | 11.5  | 198.4763 | 21.5  |
| 198.4788 | 12    | 198.5125 | 22.75 |
| 198.5113 | 7     | 198.545  | 19.5  |
| 198.5475 | 11    | 198.575  | 19.25 |
| 198.58   | 12.25 | 198.6075 | 20.75 |
| 198.6125 | 12.25 | 198.645  | 20.5  |
| 198.645  | 12    | 198.6763 | 18.5  |
| 198.6775 | 10.5  | 198.71   | 25    |
| 198.7113 | 8     | 198.7438 | 23    |
| 198.7438 | 10.25 | 198.7775 | 20    |
| 198.7775 | 7.75  | 198.81   | 20    |
| 198.8113 | 9.25  | 198.84   | 22.5  |
| 198.8438 | 10.25 | 198.8788 | 22    |
| 198.8788 | 10    | 198.91   | 22    |
| 198.9088 | 11.5  | 198.945  | 19.25 |
| 198.9463 | 9     | 198.9763 | 23.75 |
| 198.9788 | 9     | 199.01   | 20.25 |
| 199.0113 | 7     | 199.045  | 17.5  |
| 199.045  | 9.75  | 199.075  | 18.5  |
| 199.08   | 11    | 199.1075 | 20.5  |
| 199.115  | 9.75  | 199.145  | 16.75 |
| 199.145  | 9     | 199.1763 | 22    |
| 199.1788 | 13    | 199.21   | 20.25 |
| 199.2113 | 10.5  | 199.2438 | 19    |
| 199.2438 | 8.5   | 199.2775 | 23    |
| 199.2775 | 14    | 199.31   | 23    |
| 199.3113 | 8.75  | 199.34   | 23    |
| 199.3438 | 10    | 199.3788 | 22.25 |
| 199.3788 | 11.5  | 199.41   | 20.75 |
| 199.4088 | 11.5  | 199.445  | 24.5  |
| 199.4463 | 12    | 199.4763 | 29.5  |
| 199.4788 | 10.75 | 199.51   | 24    |
| 199.5113 | 8.25  | 199.545  | 28.75 |
| 199.545  | 11.5  | 199.575  | 23    |
| 199.58   | 11.75 | 199.61   | 23    |
| 199.615  | 10.5  | 199.6475 | 19.5  |
| 199.645  | 11.75 | 199.68   | 24.75 |
| 199.6788 | 9.75  | 199.7138 | 26.5  |
| 199.7113 | 13.25 | 199.7463 | 26.75 |
| 199.7438 | 11    | 199.7813 | 23.75 |
| 199.775  | 10.75 | 199.8138 | 23.5  |
| 199.81   | 11.75 | 199.8425 | 27    |
| 199.8438 | 10.25 | 199.8788 | 25.5  |
| 199.8788 | 11.25 | 199.9113 | 25    |
| 199.9088 | 13.5  | 199.9463 | 28.25 |
| 199.9463 | 10.5  | 199.9775 | 23.75 |
| 199.9788 | 11.5  | 200.0125 | 23    |



|          |       |
|----------|-------|
| 200.0113 | 13.5  |
| 200.045  | 12.75 |
| 200.08   | 12.25 |
| 200.115  | 11    |
| 200.145  | 12.25 |
| 200.1788 | 9.75  |
| 200.2113 | 12.25 |
| 200.2438 | 9.25  |
| 200.275  | 12.5  |
| 200.31   | 13    |
| 200.3438 | 9.5   |
| 200.3788 | 11    |
| 200.4088 | 12.5  |
| 200.4463 | 10.5  |
| 200.4788 | 10.5  |
| 200.5113 | 10.5  |
| 200.545  | 13.75 |
| 200.58   | 13.75 |
| 200.615  | 10.75 |
| 200.645  | 11.25 |
| 200.6788 | 10.5  |
| 200.7113 | 12    |
| 200.7438 | 11    |
| 200.775  | 11.75 |
| 200.81   | 14.25 |
| 200.8438 | 12    |
| 200.8788 | 14.75 |
| 200.9088 | 12    |
| 200.9463 | 13    |
| 200.9788 | 12.5  |
| 201.0113 | 14.75 |
| 201.045  | 15.5  |
| 201.08   | 16.25 |
| 201.115  | 18.5  |
| 201.145  | 16.75 |
| 201.1788 | 15    |
| 201.2113 | 16.25 |
| 201.2438 | 14.5  |
| 201.275  | 14.25 |
| 201.31   | 14.75 |
| 201.3438 | 13    |
| 201.3788 | 12.5  |
| 201.4088 | 13.75 |
| 201.4463 | 11.5  |
| 201.4788 | 12.5  |
| 201.5113 | 12.25 |
| 201.545  | 12.75 |
| 201.5788 | 15.75 |
| 201.615  | 16    |
| 201.645  | 20.5  |

|          |       |
|----------|-------|
| 200.0463 | 22.25 |
| 200.0763 | 24.75 |
| 200.11   | 20.5  |
| 200.1475 | 22.5  |
| 200.18   | 22    |
| 200.2125 | 25.5  |
| 200.2463 | 26    |
| 200.2813 | 23.5  |
| 200.3125 | 23.5  |
| 200.3425 | 23.5  |
| 200.3788 | 22    |
| 200.4113 | 25.5  |
| 200.4463 | 21.25 |
| 200.4775 | 24.5  |
| 200.5125 | 24.25 |
| 200.5463 | 25.5  |
| 200.5763 | 28.75 |
| 200.61   | 21.5  |
| 200.6475 | 23.75 |
| 200.68   | 24.25 |
| 200.7125 | 24.75 |
| 200.7463 | 27.75 |
| 200.7813 | 24.5  |
| 200.8138 | 22.5  |
| 200.8425 | 20.25 |
| 200.8763 | 21.5  |
| 200.9113 | 21.25 |
| 200.9463 | 26    |
| 200.9775 | 23.5  |
| 201.0125 | 21.5  |
| 201.0463 | 23    |
| 201.0763 | 26    |
| 201.11   | 22    |
| 201.1475 | 26.5  |
| 201.1788 | 22.75 |
| 201.2125 | 19.5  |
| 201.2463 | 21.75 |
| 201.2813 | 24.75 |
| 201.3125 | 23.25 |
| 201.3425 | 24.25 |
| 201.3763 | 23    |
| 201.4113 | 21.75 |
| 201.4463 | 20.25 |
| 201.4775 | 21.75 |
| 201.5125 | 21.5  |
| 201.5463 | 24.75 |
| 201.5763 | 21.5  |
| 201.61   | 15    |
| 201.6475 | 20.75 |
| 201.6788 | 20.5  |

|          |       |          |       |
|----------|-------|----------|-------|
| 201.6788 | 11.25 | 201.7125 | 23.25 |
| 201.7113 | 12.75 | 201.7463 | 18.5  |
| 201.7438 | 14.5  | 201.78   | 21.25 |
| 201.775  | 9.5   | 201.8125 | 18    |
| 201.81   | 9     | 201.8425 | 20.75 |
| 201.8438 | 11.75 | 201.8763 | 22.25 |
| 201.8788 | 14    | 201.9113 | 18    |
| 201.9088 | 13    | 201.9463 | 19.75 |
| 201.9463 | 12    | 201.9775 | 22.25 |
| 201.9788 | 9.5   | 202.0138 | 24.75 |
| 202.0113 | 11.5  | 202.0463 | 20.5  |
| 202.045  | 12.75 | 202.0763 | 20.75 |
| 202.08   | 13.25 | 202.11   | 22    |
| 202.115  | 11.25 | 202.1475 | 19    |
| 202.145  | 13.5  | 202.1788 | 22.75 |
| 202.1788 | 8.5   | 202.2125 | 23    |
| 202.2113 | 11.75 | 202.2463 | 24.5  |
| 202.2438 | 16.5  | 202.28   | 22    |
| 202.275  | 14    | 202.3125 | 22.5  |
| 202.31   | 10.75 | 202.3425 | 18.5  |
| 202.3463 | 14.25 | 202.3763 | 20.25 |
| 202.3788 | 14.5  | 202.4138 | 16.75 |
| 202.4088 | 12.5  | 202.4463 | 22.5  |
| 202.4463 | 11.75 | 202.48   | 15.25 |
| 202.4788 | 10.5  | 202.5163 | 20.5  |
| 202.5113 | 13    | 202.5488 | 19.25 |
| 202.5438 | 14.25 | 202.5788 | 20.75 |
| 202.5788 | 12.75 | 202.6113 | 19.25 |
| 202.615  | 12    | 202.6438 | 19.5  |
| 202.645  | 14    | 202.6825 | 16.5  |
| 202.6788 | 14.5  | 202.715  | 22.5  |
| 202.7113 | 10.75 | 202.7475 | 22    |
| 202.7438 | 14.25 | 202.7813 | 21.75 |
| 202.775  | 13.5  | 202.8138 | 20.5  |
| 202.8125 | 11.25 | 202.845  | 18.75 |
| 202.8463 | 13.25 | 202.8788 | 22    |
| 202.8788 | 12.75 | 202.9163 | 17.75 |
| 202.9113 | 10.5  | 202.9475 | 16.75 |
| 202.9463 | 12    | 202.98   | 15.5  |
| 202.9788 | 12    | 203.0163 | 21.75 |
| 203.0113 | 12.75 | 203.0488 | 21    |
| 203.0438 | 10.75 | 203.0788 | 16.5  |
| 203.0788 | 9.25  | 203.1113 | 21.75 |
| 203.115  | 10    | 203.1438 | 20    |
| 203.145  | 11    | 203.1825 | 21.25 |
| 203.1788 | 10.25 | 203.215  | 15.25 |
| 203.2113 | 10    | 203.2475 | 16    |
| 203.2438 | 12.75 | 203.2813 | 14.5  |
| 203.275  | 14    | 203.3138 | 17.25 |
| 203.31   | 14.75 | 203.345  | 19.25 |

|          |       |
|----------|-------|
| 203.3463 | 14    |
| 203.3788 | 16.75 |
| 203.4113 | 12    |
| 203.4463 | 10.25 |
| 203.4788 | 12.25 |
| 203.5113 | 12.25 |
| 203.5463 | 14.25 |
| 203.5788 | 11.75 |
| 203.615  | 13.5  |
| 203.645  | 11.25 |
| 203.6788 | 11.25 |
| 203.7113 | 15.5  |
| 203.7438 | 9.5   |
| 203.775  | 12.75 |
| 203.81   | 11.75 |
| 203.8463 | 15.25 |
| 203.8788 | 10.75 |
| 203.9113 | 10.75 |
| 203.9463 | 8.75  |
| 203.9788 | 11    |
| 204.0113 | 12    |
| 204.0438 | 10    |
| 204.0788 | 13    |
| 204.115  | 11.25 |
| 204.145  | 10    |
| 204.1788 | 12.75 |
| 204.2113 | 12.5  |
| 204.2438 | 11.5  |
| 204.275  | 10.5  |
| 204.31   | 13.25 |
| 204.3463 | 10.75 |
| 204.3788 | 13.5  |
| 204.4113 | 9.5   |
| 204.4463 | 12    |
| 204.4788 | 9.75  |
| 204.5113 | 14.25 |
| 204.5438 | 10    |
| 204.5788 | 11.25 |
| 204.615  | 11.5  |
| 204.645  | 13.75 |
| 204.6788 | 9     |
| 204.7113 | 11.25 |
| 204.7438 | 9.5   |
| 204.775  | 13.75 |
| 204.81   | 11.25 |
| 204.8463 | 11.5  |
| 204.8788 | 12.5  |
| 204.9113 | 13    |
| 204.9463 | 13.75 |
| 204.9788 | 12.25 |

|          |       |
|----------|-------|
| 203.3788 | 21.5  |
| 203.4163 | 19.25 |
| 203.4475 | 20.25 |
| 203.48   | 18    |
| 203.5163 | 23.25 |
| 203.5488 | 19.75 |
| 203.5788 | 21.25 |
| 203.6113 | 21.5  |
| 203.6438 | 21    |
| 203.6825 | 24.5  |
| 203.715  | 20.25 |
| 203.7475 | 22.75 |
| 203.7813 | 21.75 |
| 203.8138 | 23.5  |
| 203.845  | 21.5  |
| 203.8788 | 22.5  |
| 203.915  | 25    |
| 203.9475 | 18.75 |
| 203.98   | 23.25 |
| 204.0163 | 22.5  |
| 204.0488 | 24    |
| 204.0788 | 18.25 |
| 204.1113 | 24.75 |
| 204.1438 | 22.5  |
| 204.1825 | 18.75 |
| 204.215  | 18.5  |
| 204.2475 | 17.5  |
| 204.2813 | 21    |
| 204.3138 | 24    |
| 204.345  | 21.75 |
| 204.3788 | 20.5  |
| 204.4163 | 21    |
| 204.4475 | 19.5  |
| 204.48   | 26.75 |
| 204.5163 | 21.5  |
| 204.5488 | 19.75 |
| 204.5788 | 22.5  |
| 204.6113 | 24.25 |
| 204.6438 | 21    |
| 204.68   | 21.75 |
| 204.715  | 21.75 |
| 204.7475 | 19.25 |
| 204.7813 | 14.75 |
| 204.8138 | 20.5  |
| 204.845  | 20.5  |
| 204.8788 | 25.25 |
| 204.915  | 19.5  |
| 204.9475 | 18.5  |
| 204.98   | 24    |
| 205.0163 | 20.25 |

|          |       |
|----------|-------|
| 205.0113 | 13.5  |
| 205.0438 | 11.25 |
| 205.08   | 11.5  |
| 205.115  | 13    |
| 205.145  | 10    |
| 205.1788 | 12.75 |
| 205.2138 | 12.25 |
| 205.2463 | 13.75 |
| 205.2775 | 12.75 |
| 205.3088 | 13.25 |
| 205.3475 | 15.25 |
| 205.38   | 13    |
| 205.4125 | 14.5  |
| 205.4475 | 16.75 |
| 205.48   | 11.75 |
| 205.5125 | 13.75 |
| 205.5463 | 12    |
| 205.5825 | 16    |
| 205.6175 | 15    |
| 205.65   | 15    |
| 205.6813 | 14.5  |
| 205.7138 | 15.75 |
| 205.7463 | 10.5  |
| 205.7775 | 14.25 |
| 205.8088 | 12    |
| 205.8475 | 12.5  |
| 205.88   | 15.5  |
| 205.9125 | 10.25 |
| 205.9475 | 13    |
| 205.98   | 12    |
| 206.0125 | 10.5  |
| 206.0463 | 11    |
| 206.0825 | 11.25 |
| 206.1175 | 9.25  |
| 206.15   | 12.25 |
| 206.1813 | 12    |
| 206.2138 | 17.25 |
| 206.2463 | 11.75 |
| 206.2775 | 11.5  |
| 206.3088 | 11.75 |
| 206.3475 | 10.75 |
| 206.38   | 11    |
| 206.4125 | 10.75 |
| 206.4475 | 9     |
| 206.48   | 12.25 |
| 206.5125 | 10.5  |
| 206.5463 | 8.25  |
| 206.5825 | 12    |
| 206.6175 | 8     |
| 206.65   | 9.75  |

|          |       |
|----------|-------|
| 205.0463 | 22.25 |
| 205.0788 | 21.5  |
| 205.1113 | 21.25 |
| 205.1438 | 21.5  |
| 205.18   | 21.75 |
| 205.215  | 23.75 |
| 205.2475 | 18    |
| 205.2813 | 20.75 |
| 205.3138 | 23.5  |
| 205.345  | 25    |
| 205.3788 | 25.5  |
| 205.4138 | 19.75 |
| 205.4475 | 22.75 |
| 205.48   | 21.5  |
| 205.5163 | 22.25 |
| 205.5463 | 20.25 |
| 205.5813 | 18.25 |
| 205.6113 | 20.5  |
| 205.645  | 23.25 |
| 205.6775 | 24.5  |
| 205.715  | 22.5  |
| 205.7475 | 22.25 |
| 205.7813 | 20.25 |
| 205.8138 | 21.5  |
| 205.8463 | 21    |
| 205.8788 | 18.5  |
| 205.9138 | 15.25 |
| 205.9475 | 19.25 |
| 205.98   | 20.5  |
| 206.0163 | 21.75 |
| 206.0463 | 22    |
| 206.0788 | 22.25 |
| 206.1113 | 20.5  |
| 206.145  | 22    |
| 206.1775 | 20    |
| 206.215  | 24.5  |
| 206.25   | 22    |
| 206.2813 | 21.75 |
| 206.3163 | 18    |
| 206.345  | 20.5  |
| 206.3788 | 18.25 |
| 206.4138 | 21.75 |
| 206.4475 | 19.25 |
| 206.48   | 19    |
| 206.5163 | 22.25 |
| 206.5463 | 23    |
| 206.5788 | 21.75 |
| 206.6125 | 24    |
| 206.645  | 21.75 |
| 206.6775 | 21    |

|          |       |
|----------|-------|
| 206.6813 | 9.5   |
| 206.7138 | 12    |
| 206.7463 | 14.25 |
| 206.7775 | 11.5  |
| 206.8088 | 8.5   |
| 206.8475 | 14.5  |
| 206.8838 | 15.5  |
| 206.9125 | 12.25 |
| 206.9475 | 15.75 |
| 206.98   | 15.5  |
| 207.0125 | 13.5  |
| 207.0463 | 10.25 |
| 207.0825 | 12.5  |
| 207.1175 | 11.5  |
| 207.15   | 9.75  |
| 207.1813 | 11.25 |
| 207.2138 | 11.75 |
| 207.2463 | 14    |
| 207.2775 | 10.5  |
| 207.3088 | 13.5  |
| 207.3475 | 11.75 |
| 207.3825 | 19.5  |
| 207.4125 | 23.5  |
| 207.4475 | 18.75 |
| 207.48   | 14.75 |
| 207.5125 | 14    |
| 207.5463 | 15.25 |
| 207.58   | 16    |
| 207.6175 | 14.25 |
| 207.65   | 10    |
| 207.6813 | 13    |
| 207.7138 | 15.75 |
| 207.7463 | 10.5  |
| 207.7775 | 12.25 |
| 207.8088 | 12.75 |
| 207.8475 | 8     |
| 207.8825 | 17.75 |
| 207.9125 | 27.5  |
| 207.9475 | 11.75 |
| 207.98   | 14.75 |
| 208.0125 | 18    |
| 208.0463 | 16.5  |
| 208.08   | 15.5  |
| 208.1175 | 12.5  |
| 208.15   | 10.5  |
| 208.1813 | 10.75 |
| 208.2138 | 11.25 |
| 208.2463 | 11    |
| 208.2775 | 13.25 |
| 208.3113 | 12.5  |

|          |       |
|----------|-------|
| 206.715  | 17    |
| 206.75   | 21.75 |
| 206.7813 | 17.5  |
| 206.8138 | 16.5  |
| 206.845  | 22    |
| 206.8788 | 18    |
| 206.9138 | 16.75 |
| 206.9463 | 17.25 |
| 206.98   | 17    |
| 207.0163 | 23.75 |
| 207.0463 | 13.5  |
| 207.0788 | 21.5  |
| 207.1113 | 20.5  |
| 207.145  | 18.5  |
| 207.1775 | 18.5  |
| 207.215  | 20.25 |
| 207.25   | 23    |
| 207.2813 | 21.25 |
| 207.3138 | 16.25 |
| 207.345  | 19.75 |
| 207.3788 | 19.5  |
| 207.4138 | 19.25 |
| 207.4463 | 20.25 |
| 207.48   | 20.25 |
| 207.5163 | 20.75 |
| 207.5463 | 20    |
| 207.5788 | 21.5  |
| 207.6138 | 19.5  |
| 207.645  | 22.5  |
| 207.6775 | 23    |
| 207.715  | 26    |
| 207.75   | 24.5  |
| 207.7813 | 21    |
| 207.8125 | 27    |
| 207.845  | 26.5  |
| 207.8788 | 22.25 |
| 207.9138 | 20.5  |
| 207.9463 | 22.25 |
| 207.98   | 22    |
| 208.0163 | 20    |
| 208.0463 | 22.25 |
| 208.0788 | 21.5  |
| 208.1113 | 17.75 |
| 208.145  | 19.75 |
| 208.1775 | 14.5  |
| 208.215  | 16    |
| 208.25   | 15.75 |
| 208.2813 | 16.75 |
| 208.3125 | 18.5  |
| 208.345  | 20.25 |

|          |       |
|----------|-------|
| 208.3475 | 9.75  |
| 208.3825 | 11.75 |
| 208.4125 | 18.5  |
| 208.4463 | 16    |
| 208.48   | 13.25 |
| 208.5125 | 11.75 |
| 208.5463 | 19    |
| 208.58   | 15.75 |
| 208.6175 | 9.75  |
| 208.65   | 16.75 |
| 208.68   | 14.5  |
| 208.7138 | 12.75 |
| 208.7463 | 12.25 |
| 208.7775 | 10.5  |
| 208.8113 | 14    |
| 208.845  | 10.75 |
| 208.8825 | 13.25 |
| 208.9125 | 12.25 |
| 208.9463 | 16.25 |
| 208.98   | 12.25 |
| 209.0125 | 10.5  |
| 209.0463 | 15.5  |
| 209.08   | 16.25 |
| 209.1175 | 13.25 |
| 209.15   | 11.75 |
| 209.18   | 16    |
| 209.2138 | 14.75 |
| 209.2463 | 10.25 |
| 209.2775 | 13.25 |
| 209.3113 | 14.25 |
| 209.345  | 12.75 |
| 209.3825 | 10.5  |
| 209.4125 | 12    |
| 209.4475 | 10.5  |
| 209.48   | 11.5  |
| 209.5125 | 12.75 |
| 209.5463 | 11.75 |
| 209.5825 | 10.25 |
| 209.6175 | 9.75  |
| 209.65   | 11.25 |
| 209.68   | 13.5  |
| 209.7138 | 12.75 |
| 209.7463 | 13.25 |
| 209.7775 | 13.25 |
| 209.8113 | 15.25 |
| 209.845  | 12    |
| 209.8825 | 13.75 |
| 209.9125 | 12.75 |
| 209.9475 | 14.5  |
| 209.98   | 12.5  |

|          |       |
|----------|-------|
| 208.3788 | 24.5  |
| 208.4138 | 18.5  |
| 208.4463 | 19.5  |
| 208.48   | 21.25 |
| 208.5163 | 15.75 |
| 208.5463 | 18.25 |
| 208.5788 | 18    |
| 208.6113 | 18    |
| 208.645  | 20.25 |
| 208.6775 | 20    |
| 208.7125 | 17    |
| 208.75   | 19    |
| 208.7813 | 19.25 |
| 208.8125 | 19    |
| 208.845  | 23.5  |
| 208.8788 | 18    |
| 208.9138 | 21.5  |
| 208.9463 | 16    |
| 208.98   | 18    |
| 209.0163 | 19.25 |
| 209.0463 | 16.25 |
| 209.0788 | 20    |
| 209.1113 | 20.5  |
| 209.145  | 22.5  |
| 209.1775 | 15.25 |
| 209.2125 | 19.5  |
| 209.25   | 20    |
| 209.2813 | 22    |
| 209.3125 | 16.75 |
| 209.345  | 18    |
| 209.3788 | 20.5  |
| 209.4138 | 27.25 |
| 209.4463 | 22.75 |
| 209.48   | 22.5  |
| 209.5163 | 20.75 |
| 209.5463 | 18.5  |
| 209.5788 | 20.75 |
| 209.6113 | 18.25 |
| 209.645  | 20.75 |
| 209.6775 | 21.25 |
| 209.7125 | 21    |
| 209.75   | 22    |
| 209.7813 | 20.5  |
| 209.8125 | 20.75 |
| 209.845  | 22.75 |
| 209.8788 | 21.25 |
| 209.9138 | 21    |
| 209.9463 | 20.25 |
| 209.9813 | 21.75 |
| 210.0163 | 23    |

|          |       |
|----------|-------|
| 210.0125 | 11.5  |
| 210.0463 | 10.25 |
| 210.08   | 11.75 |
| 210.1175 | 9.5   |
| 210.15   | 11    |
| 210.18   | 10.5  |
| 210.2138 | 9.75  |
| 210.2463 | 10.25 |
| 210.2775 | 8.25  |
| 210.3113 | 6.25  |
| 210.3438 | 10.25 |
| 210.3825 | 9     |
| 210.4125 | 8     |
| 210.4463 | 10.25 |
| 210.48   | 7.75  |
| 210.5125 | 9.75  |
| 210.5475 | 11.75 |
| 210.58   | 7.75  |
| 210.6175 | 11.25 |
| 210.65   | 7.5   |
| 210.68   | 11    |
| 210.7138 | 9     |
| 210.7463 | 7.75  |
| 210.7775 | 8.5   |
| 210.8113 | 7.5   |
| 210.8438 | 9.5   |
| 210.8825 | 8.75  |
| 210.9125 | 8.75  |
| 210.9463 | 8.25  |
| 210.98   | 11    |
| 211.0125 | 11.75 |
| 211.0475 | 10.75 |
| 211.0813 | 10.75 |
| 211.115  | 11    |
| 211.15   | 10.25 |
| 211.18   | 10.5  |
| 211.2138 | 12    |
| 211.2463 | 12.5  |
| 211.2775 | 9.75  |
| 211.3113 | 15.75 |
| 211.345  | 14.25 |
| 211.385  | 10    |
| 211.415  | 8.75  |
| 211.45   | 9     |
| 211.4813 | 13.25 |
| 211.5138 | 16.25 |
| 211.5488 | 12.75 |
| 211.5825 | 8.5   |
| 211.6163 | 12.75 |
| 211.6513 | 8.75  |

|          |       |
|----------|-------|
| 210.0463 | 21.25 |
| 210.0788 | 23.25 |
| 210.1113 | 22.25 |
| 210.145  | 23.75 |
| 210.1775 | 27.75 |
| 210.2125 | 20.25 |
| 210.25   | 24.25 |
| 210.2813 | 22.5  |
| 210.3125 | 22.25 |
| 210.345  | 20    |
| 210.3788 | 25.25 |
| 210.4138 | 22.25 |
| 210.4463 | 23.25 |
| 210.4813 | 22.5  |
| 210.5163 | 24.75 |
| 210.5463 | 24    |
| 210.5763 | 25.25 |
| 210.6125 | 22.5  |
| 210.645  | 26.5  |
| 210.6775 | 22.25 |
| 210.7125 | 24    |
| 210.75   | 26    |
| 210.7813 | 19.25 |
| 210.8125 | 22.25 |
| 210.845  | 21.75 |
| 210.8788 | 22.5  |
| 210.9138 | 21.5  |
| 210.9463 | 21    |
| 210.9813 | 20.25 |
| 211.0163 | 25.5  |
| 211.0463 | 21.75 |
| 211.0763 | 24.5  |
| 211.1113 | 20.5  |
| 211.145  | 21.25 |
| 211.1775 | 20.25 |
| 211.2125 | 22.5  |
| 211.2475 | 21.5  |
| 211.2813 | 18.5  |
| 211.3125 | 18.25 |
| 211.345  | 21.75 |
| 211.3788 | 19.75 |
| 211.4138 | 20.5  |
| 211.4463 | 17.5  |
| 211.4813 | 20.75 |
| 211.5163 | 19    |
| 211.5463 | 18    |
| 211.5763 | 20.5  |
| 211.6138 | 19.75 |
| 211.645  | 17    |
| 211.6775 | 24.25 |

|          |       |
|----------|-------|
| 211.6813 | 10.25 |
| 211.7163 | 9     |
| 211.7488 | 11    |
| 211.78   | 9.5   |
| 211.8138 | 10.25 |
| 211.8475 | 9.75  |
| 211.885  | 14    |
| 211.915  | 16.5  |
| 211.95   | 12.75 |
| 211.9813 | 13.5  |
| 212.0138 | 22.25 |
| 212.0488 | 14.25 |
| 212.0825 | 11.5  |
| 212.1175 | 14    |
| 212.1513 | 12    |
| 212.1813 | 13    |
| 212.2163 | 12.25 |
| 212.2488 | 9.5   |
| 212.28   | 13.25 |
| 212.3138 | 12    |
| 212.345  | 11.5  |
| 212.385  | 9.75  |
| 212.415  | 8.25  |
| 212.4488 | 8.25  |
| 212.4813 | 12.25 |
| 212.5138 | 8.5   |
| 212.5488 | 13.75 |
| 212.5825 | 11.25 |
| 212.6175 | 10.75 |
| 212.6513 | 9.25  |
| 212.6813 | 8.75  |
| 212.7163 | 9.75  |
| 212.7488 | 10    |
| 212.7825 | 7.25  |
| 212.8138 | 16    |
| 212.845  | 15    |
| 212.885  | 8.5   |
| 212.915  | 11.5  |
| 212.9488 | 10    |
| 212.9813 | 15.25 |
| 213.0138 | 20.25 |
| 213.0488 | 15    |
| 213.0825 | 10.75 |
| 213.1175 | 10    |
| 213.1513 | 13.5  |
| 213.1813 | 10    |
| 213.2163 | 10.25 |
| 213.2488 | 11    |
| 213.2825 | 10.25 |
| 213.3138 | 10.75 |

|          |       |
|----------|-------|
| 211.7125 | 19.5  |
| 211.7475 | 18.25 |
| 211.7813 | 16    |
| 211.8125 | 17.25 |
| 211.845  | 20.25 |
| 211.8788 | 19.75 |
| 211.9138 | 17    |
| 211.9463 | 24.25 |
| 211.9813 | 22.25 |
| 212.0163 | 20.5  |
| 212.0463 | 21.5  |
| 212.0763 | 20    |
| 212.1138 | 22    |
| 212.145  | 20.5  |
| 212.1775 | 20.5  |
| 212.2125 | 22    |
| 212.2475 | 21.25 |
| 212.2813 | 20.25 |
| 212.3125 | 18.25 |
| 212.345  | 19.75 |
| 212.3788 | 16.25 |
| 212.4138 | 16.75 |
| 212.4463 | 18.25 |
| 212.4813 | 18.5  |
| 212.5138 | 15.5  |
| 212.5463 | 16.25 |
| 212.5763 | 19.5  |
| 212.6138 | 19    |
| 212.645  | 23.25 |
| 212.6775 | 19.75 |
| 212.7125 | 19.5  |
| 212.7475 | 22.5  |
| 212.7813 | 17.25 |
| 212.8125 | 22.25 |
| 212.845  | 23.75 |
| 212.8788 | 21    |
| 212.9138 | 23    |
| 212.9463 | 19.75 |
| 212.9813 | 23    |
| 213.0138 | 24.75 |
| 213.0463 | 21.5  |
| 213.0763 | 22    |
| 213.1163 | 21    |
| 213.1438 | 23.75 |
| 213.1775 | 22.5  |
| 213.2125 | 22.75 |
| 213.2475 | 25    |
| 213.2813 | 23.5  |
| 213.3125 | 24.25 |
| 213.3438 | 23.5  |



|          |       |          |       |
|----------|-------|----------|-------|
| 213.345  | 13.75 | 213.3788 | 26.25 |
| 213.3838 | 13    | 213.415  | 24    |
| 213.415  | 11.25 | 213.4463 | 22    |
| 213.4488 | 10.25 | 213.4838 | 25.75 |
| 213.4813 | 12    | 213.5138 | 24.75 |
| 213.5138 | 12.25 | 213.5463 | 21.75 |
| 213.5488 | 13.75 | 213.5763 | 21    |
| 213.5825 | 10    | 213.6138 | 20.25 |
| 213.6175 | 9.25  | 213.6438 | 23.5  |
| 213.6513 | 8.5   | 213.6775 | 26.25 |
| 213.6813 | 10.75 | 213.7125 | 20.75 |
| 213.7163 | 15.5  | 213.7475 | 21    |
| 213.7488 | 12.25 | 213.7813 | 25.75 |
| 213.7825 | 10    | 213.8125 | 27.25 |
| 213.815  | 15    | 213.8438 | 25.25 |
| 213.845  | 21    | 213.8788 | 22.25 |
| 213.8863 | 11.25 | 213.9138 | 26.5  |
| 213.915  | 11.5  | 213.9463 | 21    |
| 213.9488 | 13.75 | 213.9838 | 24    |
| 213.9813 | 13.75 | 214.0138 | 24.25 |
| 214.015  | 16.25 | 214.0463 | 24    |
| 214.0488 | 27.25 | 214.0763 | 25    |
| 214.0838 | 18.75 | 214.1138 | 24.5  |
| 214.1175 | 11.75 | 214.1438 | 27.25 |
| 214.1513 | 16.75 | 214.18   | 21.75 |
| 214.1813 | 18.75 | 214.2125 | 24.5  |
| 214.2163 | 15.75 | 214.2475 | 29.25 |
| 214.2488 | 14.5  | 214.28   | 27.5  |
| 214.2825 | 15    | 214.3125 | 22.5  |
| 214.315  | 18.5  | 214.3438 | 29    |
| 214.345  | 15    | 214.3788 | 23.25 |
| 214.3838 | 18.75 | 214.4138 | 26.75 |
| 214.415  | 11.75 | 214.445  | 20.25 |
| 214.4488 | 13    | 214.4838 | 25.5  |
| 214.4813 | 13.75 | 214.5138 | 26.25 |
| 214.5138 | 11.75 | 214.5463 | 27.5  |
| 214.5488 | 10.25 | 214.5763 | 29.25 |
| 214.5825 | 10.75 | 214.6138 | 28    |
| 214.6175 | 11    | 214.6438 | 24.75 |
| 214.6488 | 9.75  | 214.6775 | 34    |
| 214.6825 | 11.5  | 214.7125 | 23    |
| 214.7163 | 9     | 214.7475 | 21.25 |
| 214.7488 | 14.75 | 214.78   | 28.25 |
| 214.7825 | 10.75 | 214.8125 | 29    |
| 214.815  | 11    | 214.8438 | 25.75 |
| 214.845  | 12    | 214.8788 | 25.75 |
| 214.8838 | 12.75 | 214.9138 | 24.75 |
| 214.915  | 10.25 | 214.9463 | 24    |
| 214.9488 | 9.25  | 214.9838 | 21    |
| 214.9813 | 12.25 | 215.0138 | 28.5  |

|          |       |
|----------|-------|
| 215.015  | 12.25 |
| 215.0488 | 11.25 |
| 215.0825 | 10    |
| 215.1163 | 9.25  |
| 215.1488 | 8.75  |
| 215.1825 | 11.25 |
| 215.2163 | 10.25 |
| 215.2488 | 13.25 |
| 215.2825 | 11.25 |
| 215.315  | 10.75 |
| 215.345  | 7.5   |
| 215.3838 | 12.75 |
| 215.415  | 8.5   |
| 215.4488 | 8.25  |
| 215.4813 | 12.5  |
| 215.515  | 12    |
| 215.5488 | 10.75 |
| 215.5825 | 9.25  |
| 215.6188 | 9     |
| 215.6488 | 10    |
| 215.6825 | 12.25 |
| 215.7163 | 10.25 |
| 215.7488 | 11    |
| 215.7825 | 13.25 |
| 215.815  | 14.25 |
| 215.8475 | 12.25 |
| 215.8838 | 13.5  |
| 215.915  | 10.75 |
| 215.9488 | 10.25 |
| 215.9813 | 14.5  |
| 216.015  | 9     |
| 216.0488 | 12.75 |
| 216.0825 | 14    |
| 216.1163 | 12    |
| 216.1488 | 11.5  |
| 216.1825 | 8.5   |
| 216.2163 | 9.75  |
| 216.2488 | 11.25 |
| 216.2825 | 9.25  |
| 216.315  | 9.75  |
| 216.3475 | 12.25 |
| 216.3838 | 12.5  |
| 216.4138 | 13    |
| 216.4488 | 12.25 |
| 216.4813 | 14    |
| 216.515  | 12.75 |
| 216.5488 | 10.75 |
| 216.5825 | 14.75 |
| 216.6163 | 15.25 |
| 216.6488 | 11.75 |

|          |       |
|----------|-------|
| 215.0463 | 28    |
| 215.0763 | 30    |
| 215.1138 | 25.5  |
| 215.145  | 29.75 |
| 215.1775 | 30.5  |
| 215.2125 | 24.75 |
| 215.2475 | 20.75 |
| 215.28   | 24.75 |
| 215.3125 | 24    |
| 215.3438 | 24.5  |
| 215.3788 | 23.75 |
| 215.4113 | 23    |
| 215.4463 | 24.25 |
| 215.4838 | 22.75 |
| 215.5138 | 20.75 |
| 215.5463 | 24.5  |
| 215.5763 | 25.5  |
| 215.6138 | 24.25 |
| 215.6438 | 21.75 |
| 215.6775 | 26.75 |
| 215.7125 | 20    |
| 215.7475 | 24.5  |
| 215.78   | 22.75 |
| 215.8125 | 22.5  |
| 215.8438 | 23.75 |
| 215.8788 | 22.75 |
| 215.9125 | 28.75 |
| 215.9463 | 26    |
| 215.9838 | 20.75 |
| 216.0138 | 23    |
| 216.0438 | 27.25 |
| 216.0763 | 25.5  |
| 216.1138 | 20.75 |
| 216.1438 | 27.75 |
| 216.1775 | 26.75 |
| 216.2125 | 30.5  |
| 216.2475 | 22    |
| 216.28   | 28.25 |
| 216.3125 | 23    |
| 216.3438 | 22.75 |
| 216.3788 | 22.5  |
| 216.4125 | 24.5  |
| 216.4463 | 21.5  |
| 216.4838 | 24.5  |
| 216.5138 | 22.75 |
| 216.5438 | 23.75 |
| 216.5763 | 23.25 |
| 216.6113 | 23.25 |
| 216.6438 | 23.5  |
| 216.6775 | 27.5  |

|          |       |
|----------|-------|
| 216.6825 | 19.75 |
| 216.7163 | 13.75 |
| 216.7488 | 18.25 |
| 216.7825 | 15.75 |
| 216.815  | 14.75 |
| 216.8475 | 15    |
| 216.8838 | 13    |
| 216.9138 | 14    |
| 216.9488 | 11.25 |
| 216.9813 | 11.75 |
| 217.015  | 11.75 |
| 217.0513 | 12.5  |
| 217.0825 | 11    |
| 217.1163 | 11    |
| 217.1488 | 9.5   |
| 217.1825 | 13.75 |
| 217.2163 | 14    |
| 217.2488 | 12.75 |
| 217.2825 | 14.25 |
| 217.315  | 18.5  |
| 217.3475 | 12.25 |
| 217.3838 | 14.75 |
| 217.415  | 13.25 |
| 217.4488 | 13.25 |
| 217.4813 | 12.5  |
| 217.515  | 13.25 |
| 217.5513 | 14.5  |
| 217.5825 | 9     |
| 217.6163 | 11.5  |
| 217.6488 | 13.25 |
| 217.68   | 13.25 |
| 217.7163 | 12.5  |
| 217.7513 | 10    |
| 217.7813 | 12.75 |
| 217.815  | 12.25 |
| 217.8475 | 10.25 |
| 217.8813 | 12    |
| 217.9138 | 9.25  |
| 217.9488 | 14    |
| 217.9813 | 12.25 |
| 218.015  | 9.75  |
| 218.0513 | 10.5  |
| 218.0838 | 11    |
| 218.1163 | 8     |
| 218.1488 | 9.75  |
| 218.18   | 11.75 |
| 218.2188 | 9.25  |
| 218.2513 | 11.5  |
| 218.2813 | 13    |
| 218.315  | 11.5  |

|          |       |
|----------|-------|
| 216.7125 | 21.5  |
| 216.7475 | 23.75 |
| 216.78   | 26.75 |
| 216.8125 | 21.75 |
| 216.8438 | 25.25 |
| 216.8788 | 28.75 |
| 216.9113 | 22.75 |
| 216.9463 | 28.75 |
| 216.9838 | 24    |
| 217.0138 | 23.25 |
| 217.0438 | 24.5  |
| 217.0763 | 27    |
| 217.1113 | 29    |
| 217.1438 | 23.5  |
| 217.1775 | 24.75 |
| 217.2125 | 29    |
| 217.2475 | 26.75 |
| 217.28   | 27.75 |
| 217.3125 | 23.5  |
| 217.3438 | 25.25 |
| 217.3788 | 23.5  |
| 217.4113 | 23.5  |
| 217.4463 | 21.25 |
| 217.4838 | 19.25 |
| 217.5138 | 22.25 |
| 217.5463 | 20.25 |
| 217.5763 | 15.75 |
| 217.6113 | 18.25 |
| 217.6438 | 16.25 |
| 217.6763 | 19    |
| 217.7125 | 22.75 |
| 217.7475 | 21.75 |
| 217.78   | 18    |
| 217.8125 | 20.5  |
| 217.8438 | 24    |
| 217.8788 | 22.5  |
| 217.9113 | 20.75 |
| 217.9463 | 23.5  |
| 217.9838 | 24.25 |
| 218.0138 | 24    |
| 218.0438 | 23.25 |
| 218.0763 | 26.5  |
| 218.1113 | 23.5  |
| 218.1463 | 21.25 |
| 218.1763 | 25    |
| 218.2125 | 19.75 |
| 218.2475 | 25.75 |
| 218.28   | 24.25 |
| 218.3113 | 20    |
| 218.3438 | 23.5  |

|          |       |
|----------|-------|
| 218.3475 | 8     |
| 218.3813 | 11.25 |
| 218.4138 | 11.5  |
| 218.4488 | 10.5  |
| 218.4813 | 10.75 |
| 218.515  | 8.75  |
| 218.5513 | 10.75 |
| 218.5838 | 11.25 |
| 218.6163 | 9.75  |
| 218.6488 | 13.75 |
| 218.68   | 16    |
| 218.7163 | 11.75 |
| 218.7513 | 13    |
| 218.7813 | 12    |
| 218.815  | 13    |
| 218.8475 | 16.25 |
| 218.8813 | 12.5  |
| 218.9138 | 10.25 |
| 218.9513 | 12.5  |
| 218.9813 | 12.25 |
| 219.015  | 11.75 |
| 219.0513 | 10.5  |
| 219.0838 | 9     |
| 219.1163 | 12    |
| 219.1488 | 9.25  |
| 219.18   | 9.75  |
| 219.2163 | 10    |
| 219.2513 | 14.5  |
| 219.2813 | 15.25 |
| 219.3175 | 14    |
| 219.3475 | 12    |
| 219.3813 | 12.75 |
| 219.4138 | 16    |
| 219.4488 | 11    |
| 219.4813 | 16.5  |
| 219.515  | 13.75 |
| 219.5513 | 16.25 |
| 219.5838 | 15.75 |
| 219.6163 | 12.5  |
| 219.6488 | 13.75 |
| 219.68   | 13.75 |
| 219.7163 | 17.5  |
| 219.7513 | 17    |
| 219.7813 | 17.75 |
| 219.8175 | 12.75 |
| 219.8475 | 11.75 |
| 219.8813 | 14.5  |
| 219.9138 | 12    |
| 219.9488 | 15    |
| 219.9813 | 14.25 |

|          |       |
|----------|-------|
| 218.3788 | 25    |
| 218.4125 | 26.5  |
| 218.4463 | 22.75 |
| 218.4838 | 25.5  |
| 218.5138 | 26.25 |
| 218.5438 | 27    |
| 218.5763 | 29    |
| 218.6113 | 29    |
| 218.6438 | 27    |
| 218.6763 | 26.5  |
| 218.7125 | 22    |
| 218.7475 | 22.75 |
| 218.78   | 24.25 |
| 218.8113 | 25.75 |
| 218.8438 | 20.5  |
| 218.8813 | 30.75 |
| 218.9125 | 24.5  |
| 218.9463 | 25.25 |
| 218.9813 | 22.5  |
| 219.0138 | 26    |
| 219.0438 | 25.5  |
| 219.0763 | 24    |
| 219.1113 | 24.5  |
| 219.1438 | 26.75 |
| 219.1763 | 25.75 |
| 219.2125 | 22.75 |
| 219.2475 | 23.5  |
| 219.28   | 24.25 |
| 219.3113 | 25    |
| 219.3438 | 23.5  |
| 219.3788 | 21.75 |
| 219.4125 | 25.25 |
| 219.4463 | 20.5  |
| 219.4813 | 21    |
| 219.5138 | 23.25 |
| 219.5438 | 22.5  |
| 219.5763 | 25.75 |
| 219.6113 | 22.75 |
| 219.6438 | 23.5  |
| 219.6763 | 20.5  |
| 219.7125 | 24.75 |
| 219.7488 | 21.5  |
| 219.78   | 25    |
| 219.8113 | 18.75 |
| 219.8438 | 21.25 |
| 219.8763 | 18.5  |
| 219.9125 | 26.5  |
| 219.9438 | 25.5  |
| 219.9813 | 19.5  |
| 220.0138 | 17.75 |

|          |       |
|----------|-------|
| 220.015  | 12    |
| 220.0513 | 13    |
| 220.0838 | 9.75  |
| 220.1163 | 9.75  |
| 220.1488 | 9.5   |
| 220.18   | 11.25 |
| 220.2163 | 11.25 |
| 220.2513 | 9.5   |
| 220.2838 | 8.5   |
| 220.3175 | 10    |
| 220.3475 | 5.75  |
| 220.3813 | 11    |
| 220.4138 | 11    |
| 220.4488 | 7.5   |
| 220.4813 | 9.5   |
| 220.515  | 9     |
| 220.5513 | 8.25  |
| 220.5838 | 9.5   |
| 220.6163 | 10.25 |
| 220.6488 | 13.25 |
| 220.68   | 12.25 |
| 220.7138 | 13.5  |
| 220.7513 | 13    |
| 220.7838 | 7.25  |
| 220.8175 | 11    |
| 220.8475 | 14.75 |
| 220.8813 | 11.75 |
| 220.9138 | 13.25 |
| 220.9488 | 11    |
| 220.9838 | 14.75 |
| 221.015  | 11.25 |
| 221.0488 | 14    |
| 221.0838 | 13.75 |
| 221.1163 | 14.25 |
| 221.1488 | 13.25 |
| 221.18   | 12.25 |
| 221.2138 | 14.25 |
| 221.2513 | 16.25 |
| 221.2838 | 14.5  |
| 221.3175 | 14    |
| 221.3475 | 14.5  |
| 221.3813 | 14    |
| 221.4138 | 12.75 |
| 221.4488 | 13.25 |
| 221.4838 | 14    |
| 221.515  | 12.25 |
| 221.5488 | 11.5  |
| 221.5838 | 11.5  |
| 221.6163 | 11    |
| 221.6475 | 10.75 |

|          |       |
|----------|-------|
| 220.0438 | 18.75 |
| 220.0763 | 21.25 |
| 220.1113 | 20    |
| 220.1438 | 23.75 |
| 220.1763 | 19    |
| 220.2125 | 21.75 |
| 220.2475 | 22.75 |
| 220.28   | 36.25 |
| 220.3113 | 24.5  |
| 220.3438 | 28    |
| 220.3763 | 20.5  |
| 220.4125 | 21.75 |
| 220.4425 | 21.25 |
| 220.4813 | 28    |
| 220.5138 | 20.25 |
| 220.5438 | 25.5  |
| 220.5763 | 27.5  |
| 220.6113 | 53    |
| 220.6438 | 46.5  |
| 220.6763 | 40.5  |
| 220.7475 | 34.25 |
| 220.78   | 30    |
| 220.8113 | 28    |
| 220.8438 | 32.25 |
| 220.8763 | 33.25 |
| 220.9125 | 40.5  |
| 220.9425 | 24.75 |
| 220.9813 | 36.25 |
| 221.0138 | 48.25 |
| 221.0438 | 24.75 |
| 221.0738 | 28    |
| 221.1113 | 28.75 |
| 221.1463 | 27.25 |
| 221.1763 | 24.5  |
| 221.2125 | 40    |
| 221.2475 | 32.75 |
| 221.28   | 41.5  |
| 221.3113 | 34.5  |
| 221.3438 | 35.75 |
| 221.3763 | 34.5  |
| 221.4125 | 39.75 |
| 221.4425 | 20.75 |
| 221.4813 | 27.25 |
| 221.5138 | 29.5  |
| 221.5438 | 26    |
| 221.5738 | 20.75 |
| 221.6113 | 33    |
| 221.6463 | 24.75 |
| 221.6763 | 20.5  |

|          |       |
|----------|-------|
| 221.68   | 12    |
| 221.7138 | 12.5  |
| 221.7513 | 16.75 |
| 221.7838 | 11    |
| 221.8175 | 11.25 |
| 221.8475 | 11.5  |
| 221.8813 | 11.5  |
| 221.9138 | 14    |
| 221.9488 | 14.25 |
| 221.9825 | 14.25 |
| 222.015  | 16    |
| 222.05   | 11.5  |
| 222.0838 | 12.75 |
| 222.1163 | 14    |
| 222.1475 | 11.75 |
| 222.18   | 15    |
| 222.2138 | 11.5  |
| 222.2513 | 9.25  |
| 222.2863 | 12.75 |
| 222.3175 | 9.25  |
| 222.3475 | 12.75 |
| 222.3813 | 12.5  |
| 222.4138 | 12.5  |
| 222.4488 | 12.25 |
| 222.4825 | 16.75 |
| 222.5163 | 16.75 |
| 222.55   | 14    |
| 222.5838 | 14.25 |
| 222.6163 | 10.25 |
| 222.6475 | 13    |
| 222.68   | 13    |
| 222.7138 | 9.25  |
| 222.7513 | 11.5  |
| 222.7838 | 11.25 |
| 222.8175 | 11    |
| 222.8475 | 14.25 |
| 222.8813 | 12    |
| 222.9138 | 13.75 |
| 222.9488 | 11.5  |
| 222.9825 | 13    |
| 223.0163 | 9.5   |
| 223.05   | 14.75 |
| 223.0838 | 11.75 |
| 223.1163 | 17.5  |
| 223.1475 | 19.25 |
| 223.18   | 15.25 |
| 223.215  | 13.5  |
| 223.2488 | 14.25 |
| 223.2838 | 14    |
| 223.3175 | 15.25 |

|          |       |
|----------|-------|
| 221.7125 | 27.25 |
| 221.7488 | 26    |
| 221.78   | 21.75 |
| 221.8113 | 25.75 |
| 221.8438 | 24    |
| 221.8763 | 26.75 |
| 221.9125 | 28.25 |
| 221.9425 | 25.25 |
| 221.9813 | 37.75 |
| 222.0138 | 30.75 |
| 222.0438 | 24.25 |
| 222.0738 | 28.75 |
| 222.1113 | 40.25 |
| 222.1463 | 24.5  |
| 222.1763 | 43.5  |
| 222.21   | 28.75 |
| 222.2463 | 39    |
| 222.28   | 26.5  |
| 222.3113 | 26.25 |
| 222.3438 | 27.25 |
| 222.3763 | 32.75 |
| 222.4125 | 26    |
| 222.4425 | 37.75 |
| 222.4813 | 40.25 |
| 222.5138 | 30.25 |
| 222.5438 | 32.25 |
| 222.5738 | 30.75 |
| 222.6113 | 26.25 |
| 222.6463 | 25.75 |
| 222.6763 | 26.25 |
| 222.71   | 21.25 |
| 222.7463 | 27.5  |
| 222.78   | 25.5  |
| 222.8113 | 34.75 |
| 222.8438 | 37.75 |
| 222.8763 | 27.75 |
| 222.9125 | 37.25 |
| 222.9425 | 35    |
| 222.9813 | 25.25 |
| 223.0138 | 33.25 |
| 223.0463 | 28.5  |
| 223.0738 | 29    |
| 223.1113 | 31    |
| 223.1463 | 25.25 |
| 223.1763 | 27    |
| 223.21   | 30.5  |
| 223.2463 | 24.75 |
| 223.28   | 26.25 |
| 223.3113 | 28    |
| 223.3438 | 29.75 |

|          |       |
|----------|-------|
| 223.3475 | 12.25 |
| 223.3813 | 17.75 |
| 223.4138 | 15.25 |
| 223.4488 | 15    |
| 223.4825 | 11.25 |
| 223.5163 | 11.25 |
| 223.55   | 14    |
| 223.5838 | 13    |
| 223.6163 | 17    |
| 223.6475 | 15.25 |
| 223.68   | 13.75 |
| 223.7138 | 15    |
| 223.7488 | 14.75 |
| 223.7838 | 15.25 |
| 223.8163 | 12.25 |
| 223.8475 | 16.75 |
| 223.8813 | 12.5  |
| 223.9138 | 9.75  |
| 223.9488 | 13.25 |
| 223.9825 | 16.5  |
| 224.0163 | 14.75 |
| 224.05   | 16.5  |
| 224.0838 | 15.75 |
| 224.1163 | 14.25 |
| 224.1475 | 15.25 |
| 224.18   | 15.25 |
| 224.2138 | 14    |
| 224.2488 | 16    |
| 224.2863 | 15.5  |
| 224.3163 | 15    |
| 224.3475 | 15    |
| 224.3813 | 18.25 |
| 224.4163 | 12    |
| 224.4488 | 9.75  |
| 224.485  | 11    |
| 224.5138 | 12.5  |
| 224.55   | 9.5   |
| 224.5838 | 11.75 |
| 224.6163 | 7.75  |
| 224.6475 | 13.5  |
| 224.68   | 13.5  |
| 224.7138 | 11.25 |
| 224.7488 | 9.75  |
| 224.7863 | 12.75 |
| 224.8163 | 14.5  |
| 224.8475 | 13    |
| 224.8813 | 14.5  |
| 224.9163 | 13.5  |
| 224.9488 | 10.5  |
| 224.9825 | 11.25 |

|          |       |
|----------|-------|
| 223.3763 | 25    |
| 223.4125 | 24.75 |
| 223.4425 | 25    |
| 223.4813 | 24.25 |
| 223.5138 | 25.25 |
| 223.5438 | 27.5  |
| 223.5738 | 22.75 |
| 223.6113 | 23    |
| 223.6463 | 23    |
| 223.6763 | 28.75 |
| 223.71   | 23.5  |
| 223.7463 | 28.25 |
| 223.78   | 23.25 |
| 223.8113 | 19.5  |
| 223.8438 | 27    |
| 223.8763 | 25.25 |
| 223.9125 | 25.25 |
| 223.9425 | 25.5  |
| 223.9813 | 25.5  |
| 224.0138 | 21.75 |
| 224.0438 | 23.5  |
| 224.0738 | 23.5  |
| 224.1113 | 20.25 |
| 224.1463 | 18.5  |
| 224.1763 | 21    |
| 224.21   | 20.5  |
| 224.2463 | 21.25 |
| 224.28   | 21.25 |
| 224.3113 | 20.75 |
| 224.3438 | 20.75 |
| 224.3763 | 25    |
| 224.4125 | 23.75 |
| 224.4425 | 18.25 |
| 224.48   | 21.25 |
| 224.5113 | 21.5  |
| 224.5438 | 22.25 |
| 224.5738 | 23    |
| 224.6113 | 21.25 |
| 224.6463 | 21    |
| 224.6763 | 20.75 |
| 224.71   | 21    |
| 224.7463 | 18.25 |
| 224.78   | 20.25 |
| 224.8113 | 21.5  |
| 224.8438 | 18.5  |
| 224.8763 | 18.5  |
| 224.9125 | 19.25 |
| 224.9425 | 17.75 |
| 224.98   | 17.5  |
| 225.0113 | 19    |

|          |       |
|----------|-------|
| 225.0138 | 10.25 |
| 225.05   | 10.25 |
| 225.0838 | 17    |
| 225.1163 | 16    |
| 225.1475 | 11.5  |
| 225.18   | 9.75  |
| 225.215  | 13.25 |
| 225.2513 | 14.5  |
| 225.2863 | 11.25 |
| 225.3163 | 14.5  |
| 225.3475 | 15    |
| 225.3813 | 12.25 |
| 225.4138 | 10.75 |
| 225.4488 | 11.75 |
| 225.4825 | 12.75 |
| 225.5138 | 22.75 |
| 225.55   | 26    |
| 225.5838 | 13.75 |
| 225.6163 | 14    |
| 225.6475 | 11.5  |
| 225.68   | 9.75  |
| 225.715  | 12.25 |
| 225.7513 | 11.5  |
| 225.7863 | 10    |
| 225.8163 | 9.5   |
| 225.8475 | 10.75 |
| 225.8825 | 11.75 |
| 225.9138 | 17.5  |
| 225.9488 | 15.5  |
| 225.9825 | 11.75 |
| 226.0138 | 11.5  |
| 226.05   | 15.25 |
| 226.0813 | 21.75 |
| 226.1163 | 19.25 |
| 226.1475 | 16    |
| 226.18   | 7     |
| 226.215  | 19.5  |
| 226.2513 | 20.5  |
| 226.285  | 6.5   |
| 226.3163 | 11.75 |
| 226.3475 | 9.25  |
| 226.3813 | 8.75  |
| 226.4138 | 13.75 |
| 226.4488 | 11    |
| 226.4825 | 12.5  |
| 226.5163 | 9     |
| 226.55   | 13    |
| 226.5813 | 10.5  |
| 226.6163 | 11.5  |
| 226.6475 | 10    |

|          |       |
|----------|-------|
| 225.0438 | 19.25 |
| 225.0738 | 25.5  |
| 225.1113 | 21.5  |
| 225.1463 | 24    |
| 225.1763 | 23.5  |
| 225.21   | 24.75 |
| 225.2463 | 20.5  |
| 225.2788 | 20.75 |
| 225.3113 | 23.5  |
| 225.3438 | 23.25 |
| 225.3763 | 21    |
| 225.4125 | 26.75 |
| 225.4425 | 25.75 |
| 225.48   | 22.25 |
| 225.5113 | 22.5  |
| 225.5438 | 24.5  |
| 225.5738 | 22.75 |
| 225.6113 | 21.75 |
| 225.6463 | 21.25 |
| 225.6763 | 28    |
| 225.71   | 25    |
| 225.7463 | 23.25 |
| 225.7788 | 24.5  |
| 225.8113 | 28.75 |
| 225.8438 | 22.5  |
| 225.8763 | 25.75 |
| 225.9125 | 24.5  |
| 225.9425 | 21.75 |
| 225.98   | 18.5  |
| 226.0113 | 24.5  |
| 226.0438 | 24.25 |
| 226.0763 | 22    |
| 226.1113 | 27.25 |
| 226.1463 | 25    |
| 226.1763 | 25.5  |
| 226.21   | 22.75 |
| 226.2463 | 21    |
| 226.2788 | 22.25 |
| 226.3113 | 22    |
| 226.3438 | 23    |
| 226.3775 | 23.25 |
| 226.4125 | 20.75 |
| 226.4425 | 22.5  |
| 226.48   | 23.5  |
| 226.5113 | 18.5  |
| 226.5438 | 23    |
| 226.5763 | 19.25 |
| 226.6113 | 20.5  |
| 226.6463 | 17.75 |
| 226.6763 | 19    |



|          |       |
|----------|-------|
| 226.68   | 15.75 |
| 226.715  | 14.25 |
| 226.7513 | 12    |
| 226.785  | 13.5  |
| 226.8163 | 11.5  |
| 226.8475 | 16    |
| 226.8813 | 15.25 |
| 226.9138 | 16.25 |
| 226.9488 | 11.25 |
| 226.9825 | 11.25 |
| 227.0188 | 15.5  |
| 227.0525 | 13.25 |
| 227.0825 | 11.25 |
| 227.1175 | 12.5  |
| 227.1488 | 13.5  |
| 227.185  | 10.25 |
| 227.2163 | 11.25 |
| 227.2525 | 9.25  |
| 227.2863 | 9.25  |
| 227.3188 | 10    |
| 227.35   | 12    |
| 227.3838 | 8.25  |
| 227.4175 | 11.25 |
| 227.4513 | 9.75  |
| 227.485  | 9.25  |
| 227.5188 | 8.75  |
| 227.55   | 7.5   |
| 227.5825 | 9     |
| 227.6175 | 13    |
| 227.6488 | 8.25  |
| 227.685  | 9.25  |
| 227.7163 | 11.5  |
| 227.7525 | 8.5   |
| 227.7863 | 10.75 |
| 227.8188 | 10    |
| 227.8488 | 11.25 |
| 227.8838 | 10.25 |
| 227.9175 | 10.75 |
| 227.9513 | 9.25  |
| 227.9863 | 12.25 |
| 228.0188 | 11.5  |
| 228.05   | 10.75 |
| 228.0825 | 11.25 |
| 228.1175 | 10.25 |
| 228.1488 | 10.25 |
| 228.185  | 10.5  |
| 228.2163 | 9.75  |
| 228.2525 | 10    |
| 228.2863 | 9.5   |
| 228.3188 | 10.75 |

|          |       |
|----------|-------|
| 226.7075 | 21    |
| 226.7463 | 22.25 |
| 226.7788 | 22.25 |
| 226.8113 | 22.25 |
| 226.8438 | 20.5  |
| 226.8775 | 23    |
| 226.9125 | 19    |
| 226.9425 | 16.75 |
| 226.98   | 18    |
| 227.0113 | 17.75 |
| 227.0413 | 20    |
| 227.0763 | 17.75 |
| 227.1113 | 19.25 |
| 227.1463 | 17    |
| 227.1763 | 17    |
| 227.2075 | 18    |
| 227.2438 | 23    |
| 227.2788 | 18.75 |
| 227.3113 | 18.75 |
| 227.3438 | 16.25 |
| 227.3775 | 16.5  |
| 227.4125 | 18.75 |
| 227.4425 | 17.25 |
| 227.48   | 19.5  |
| 227.5113 | 18.25 |
| 227.5413 | 19.5  |
| 227.5763 | 19    |
| 227.6113 | 23    |
| 227.6463 | 22    |
| 227.6763 | 22.75 |
| 227.7075 | 18.5  |
| 227.7438 | 23.75 |
| 227.7788 | 17    |
| 227.8113 | 22    |
| 227.8463 | 25    |
| 227.8775 | 20.5  |
| 227.9125 | 21    |
| 227.9425 | 22.75 |
| 227.98   | 24.25 |
| 228.0113 | 21.75 |
| 228.0413 | 25    |
| 228.0763 | 25.75 |
| 228.1113 | 27.25 |
| 228.1463 | 25.75 |
| 228.1763 | 18.75 |
| 228.2075 | 24.25 |
| 228.2438 | 17.5  |
| 228.2788 | 19.5  |
| 228.3113 | 18.5  |
| 228.3475 | 23.5  |

|          |       |
|----------|-------|
| 228.3488 | 10.25 |
| 228.3838 | 13    |
| 228.4175 | 12.25 |
| 228.4513 | 10.5  |
| 228.4863 | 13.75 |
| 228.5188 | 14    |
| 228.55   | 12.25 |
| 228.5825 | 13    |
| 228.6175 | 11.25 |
| 228.6488 | 12.25 |
| 228.685  | 11.5  |
| 228.7163 | 12.5  |
| 228.7525 | 13.75 |
| 228.7863 | 11.5  |
| 228.8188 | 13.25 |
| 228.8488 | 12.75 |
| 228.8838 | 13    |
| 228.9175 | 12.25 |
| 228.9513 | 14.5  |
| 228.9863 | 11.25 |
| 229.0188 | 13    |
| 229.05   | 12.75 |
| 229.0825 | 11.25 |
| 229.1175 | 12.25 |
| 229.1488 | 12    |
| 229.185  | 9.75  |
| 229.2163 | 11.25 |
| 229.2525 | 10.5  |
| 229.2888 | 11.5  |
| 229.3175 | 13.25 |
| 229.3488 | 13    |
| 229.3838 | 11.75 |
| 229.4163 | 14.25 |
| 229.4513 | 10.5  |
| 229.4863 | 13    |
| 229.5188 | 13.25 |
| 229.55   | 11.75 |
| 229.5825 | 9.5   |
| 229.615  | 12.5  |
| 229.6488 | 12.5  |
| 229.685  | 13.5  |
| 229.7163 | 13.75 |
| 229.7538 | 11.25 |
| 229.7863 | 11.75 |
| 229.8175 | 11    |
| 229.8488 | 12.75 |
| 229.8838 | 15.75 |
| 229.9163 | 16.75 |
| 229.9513 | 11.75 |
| 229.9863 | 11.5  |

|          |       |
|----------|-------|
| 228.3775 | 23    |
| 228.4125 | 21.5  |
| 228.4425 | 18.5  |
| 228.48   | 22.75 |
| 228.5113 | 21.75 |
| 228.5413 | 17.75 |
| 228.5763 | 19.5  |
| 228.6113 | 15.75 |
| 228.6463 | 18    |
| 228.6763 | 18    |
| 228.7075 | 20.5  |
| 228.745  | 23    |
| 228.7788 | 22    |
| 228.8088 | 19.5  |
| 228.845  | 29.25 |
| 228.8775 | 24    |
| 228.9125 | 25    |
| 228.9425 | 26    |
| 228.98   | 20.75 |
| 229.0113 | 20.75 |
| 229.0413 | 20.25 |
| 229.0763 | 20.5  |
| 229.1113 | 23    |
| 229.1463 | 23.25 |
| 229.1763 | 23.75 |
| 229.2075 | 18.75 |
| 229.2438 | 20.25 |
| 229.2788 | 19.25 |
| 229.3088 | 18    |
| 229.3463 | 21    |
| 229.3775 | 17.5  |
| 229.4125 | 20.5  |
| 229.4425 | 19.25 |
| 229.48   | 17    |
| 229.5113 | 18.5  |
| 229.5438 | 16.25 |
| 229.5763 | 20.75 |
| 229.6113 | 18.25 |
| 229.6463 | 19.25 |
| 229.6763 | 21.5  |
| 229.7075 | 22    |
| 229.7438 | 19.5  |
| 229.7788 | 21.75 |
| 229.81   | 22.25 |
| 229.845  | 23.5  |
| 229.8775 | 23.25 |
| 229.9125 | 23.75 |
| 229.9425 | 18    |
| 229.9775 | 20.75 |
| 230.0113 | 22.75 |

|          |       |          |       |
|----------|-------|----------|-------|
| 230.0188 | 13.75 | 230.0413 | 20.5  |
| 230.05   | 16.5  | 230.075  | 22.5  |
| 230.0825 | 13.75 | 230.1113 | 24.5  |
| 230.115  | 13    | 230.1463 | 26    |
| 230.1488 | 12.5  | 230.1763 | 23    |
| 230.185  | 12.5  | 230.2075 | 22.25 |
| 230.2163 | 12.25 | 230.2438 | 24.25 |
| 230.2538 | 13.5  | 230.2788 | 24.5  |
| 230.2863 | 14    | 230.31   | 17.25 |
| 230.3175 | 10.25 | 230.345  | 20    |
| 230.3488 | 15    | 230.3775 | 20.5  |
| 230.3838 | 17.25 | 230.4125 | 24.5  |
| 230.4175 | 13.5  | 230.4425 | 19.75 |
| 230.4513 | 13.5  | 230.4775 | 19.25 |
| 230.4863 | 15    | 230.5113 | 20.5  |
| 230.5188 | 11.75 | 230.5413 | 18    |
| 230.55   | 15.25 | 230.5775 | 20.75 |
| 230.5825 | 16.25 | 230.6113 | 18.25 |
| 230.615  | 12.5  | 230.6463 | 19.75 |
| 230.6488 | 11.75 | 230.6763 | 18.75 |
| 230.685  | 17    | 230.7075 | 19.5  |
| 230.7163 | 15.5  | 230.7438 | 17.75 |
| 230.7538 | 12    | 230.7788 | 17.5  |
| 230.7863 | 11.5  | 230.81   | 19    |
| 230.8175 | 17.25 | 230.845  | 20.5  |
| 230.8488 | 14    | 230.88   | 20.75 |
| 230.8838 | 11.5  | 230.915  | 21.25 |
| 230.9175 | 16.5  | 230.945  | 21    |
| 230.9513 | 13    | 230.98   | 18.25 |
| 230.9863 | 13.75 | 231.0138 | 17.5  |
| 231.0188 | 14.5  | 231.0438 | 22.25 |
| 231.05   | 10.25 | 231.0775 | 19.75 |
| 231.0825 | 12.25 | 231.1125 | 19    |
| 231.115  | 16.5  | 231.1475 | 23.5  |
| 231.1488 | 12.75 | 231.1788 | 21.5  |
| 231.185  | 12.5  | 231.2113 | 20.75 |
| 231.2188 | 13    | 231.245  | 20.25 |
| 231.2538 | 13.5  | 231.28   | 22.25 |
| 231.2863 | 11.75 | 231.3113 | 19    |
| 231.3175 | 10.5  | 231.3475 | 21.5  |
| 231.3488 | 13.5  | 231.38   | 19.25 |
| 231.3838 | 11.75 | 231.415  | 21    |
| 231.4175 | 13.5  | 231.445  | 21.5  |
| 231.4513 | 14.25 | 231.48   | 18.5  |
| 231.4863 | 11.75 | 231.5138 | 21.25 |
| 231.5188 | 10.25 | 231.5438 | 22.5  |
| 231.5525 | 11.5  | 231.5775 | 20.5  |
| 231.5825 | 13.25 | 231.6125 | 27.25 |
| 231.615  | 12    | 231.6475 | 22.75 |
| 231.6488 | 10.25 | 231.6775 | 20.25 |

|          |       |
|----------|-------|
| 231.685  | 15    |
| 231.7188 | 15.5  |
| 231.7538 | 14.25 |
| 231.7863 | 12.25 |
| 231.8188 | 15    |
| 231.8488 | 12    |
| 231.8813 | 14.25 |
| 231.9175 | 16.5  |
| 231.9513 | 15.5  |
| 231.9863 | 13.5  |
| 232.0188 | 12.25 |
| 232.05   | 13.25 |
| 232.08   | 11.25 |
| 232.115  | 11.25 |
| 232.1488 | 13.75 |
| 232.185  | 17.75 |
| 232.2188 | 14.25 |
| 232.2538 | 10    |
| 232.2863 | 10.5  |
| 232.3175 | 10.75 |
| 232.3488 | 10.5  |
| 232.3813 | 13.75 |
| 232.4175 | 11.5  |
| 232.4513 | 10    |
| 232.4888 | 10.75 |
| 232.5188 | 10.5  |
| 232.55   | 13.25 |
| 232.58   | 14    |
| 232.615  | 12    |
| 232.6513 | 11    |
| 232.685  | 18.75 |
| 232.7188 | 20.75 |
| 232.7538 | 10    |
| 232.7863 | 12    |
| 232.8175 | 17    |
| 232.8488 | 13.5  |
| 232.8813 | 11.75 |
| 232.9175 | 13    |
| 232.9513 | 11.25 |
| 232.9888 | 11.5  |
| 233.0188 | 10.25 |
| 233.05   | 9.75  |
| 233.08   | 13.25 |
| 233.115  | 15.5  |
| 233.1513 | 10.25 |
| 233.1825 | 9.75  |
| 233.2213 | 12.75 |
| 233.2538 | 13.5  |
| 233.2863 | 10.5  |
| 233.3175 | 16    |

|          |       |
|----------|-------|
| 231.7113 | 20.25 |
| 231.745  | 20.25 |
| 231.78   | 19.5  |
| 231.8113 | 17    |
| 231.8475 | 17.25 |
| 231.88   | 18.25 |
| 231.915  | 15.75 |
| 231.95   | 17.25 |
| 231.98   | 18    |
| 232.0138 | 18    |
| 232.0438 | 19.75 |
| 232.0775 | 20.75 |
| 232.1125 | 20.5  |
| 232.1463 | 21.75 |
| 232.1775 | 23.75 |
| 232.2113 | 21.25 |
| 232.245  | 24.25 |
| 232.28   | 19.5  |
| 232.3113 | 21.75 |
| 232.345  | 22    |
| 232.38   | 22.25 |
| 232.415  | 24.5  |
| 232.4463 | 22    |
| 232.48   | 21.5  |
| 232.5138 | 22.75 |
| 232.5438 | 20.5  |
| 232.5775 | 21.5  |
| 232.6125 | 18.5  |
| 232.6463 | 17.25 |
| 232.6775 | 17.75 |
| 232.7113 | 18    |
| 232.7438 | 18.5  |
| 232.78   | 16.5  |
| 232.8113 | 18.75 |
| 232.845  | 19.25 |
| 232.88   | 19.25 |
| 232.915  | 20.25 |
| 232.9463 | 22    |
| 232.98   | 18.5  |
| 233.0138 | 16    |
| 233.0463 | 21.75 |
| 233.08   | 18.75 |
| 233.1125 | 18.25 |
| 233.1463 | 16.75 |
| 233.1775 | 13.5  |
| 233.2113 | 17.75 |
| 233.2438 | 17.75 |
| 233.28   | 14.25 |
| 233.3113 | 16.5  |
| 233.345  | 14    |

|          |       |          |       |
|----------|-------|----------|-------|
| 233.3488 | 17.25 | 233.38   | 16.25 |
| 233.3813 | 11.75 | 233.415  | 18.5  |
| 233.4175 | 14.75 | 233.4463 | 18.25 |
| 233.4513 | 11.75 | 233.48   | 15.25 |
| 233.4888 | 10.75 | 233.5138 | 16    |
| 233.5188 | 11.75 | 233.5463 | 18.5  |
| 233.55   | 13.25 | 233.58   | 19.25 |
| 233.58   | 13.5  | 233.6125 | 14.75 |
| 233.615  | 14.5  | 233.6463 | 13.75 |
| 233.6513 | 9.75  | 233.6775 | 18.75 |
| 233.6825 | 12.5  | 233.7113 | 19.75 |
| 233.7188 | 14    | 233.7463 | 19.75 |
| 233.7538 | 11.25 | 233.78   | 15.75 |
| 233.7863 | 11.5  | 233.8113 | 19.25 |
| 233.8175 | 13    | 233.845  | 16.5  |
| 233.8488 | 9.5   | 233.88   | 13.75 |
| 233.8813 | 13.25 | 233.915  | 18.75 |
| 233.915  | 15.25 | 233.9463 | 18    |
| 233.9513 | 17    | 233.98   | 18.75 |
| 233.9888 | 16    | 234.0138 | 19.5  |
| 234.0213 | 11.25 | 234.0463 | 20.5  |
| 234.05   | 10.5  | 234.08   | 20.5  |
| 234.08   | 13    | 234.1125 | 17.25 |
| 234.115  | 9.5   | 234.1463 | 18.5  |
| 234.1513 | 8.5   | 234.1775 | 17.25 |
| 234.1825 | 8.25  | 234.2113 | 21.5  |
| 234.2188 | 9.5   | 234.2438 | 19.5  |
| 234.2538 | 8.5   | 234.28   | 16    |
| 234.2863 | 12.25 | 234.3113 | 19.75 |
| 234.3175 | 8.75  | 234.3475 | 21.5  |
| 234.3488 | 11    | 234.38   | 18.5  |
| 234.3825 | 23.5  | 234.415  | 20.25 |
| 234.415  | 13.5  | 234.4463 | 24    |
| 234.4513 | 18    | 234.48   | 21.5  |
| 234.4888 | 21    | 234.5138 | 21.25 |
| 234.5188 | 9.5   | 234.5463 | 22    |
| 234.55   | 13.5  | 234.58   | 20.75 |
| 234.58   | 18.75 | 234.6125 | 17.25 |
| 234.615  | 12    | 234.6463 | 23.25 |
| 234.65   | 16.5  | 234.68   | 23    |
| 234.6825 | 9.5   | 234.7113 | 24.25 |
| 234.7188 | 12.5  | 234.7438 | 23    |
| 234.7538 | 10.25 | 234.78   | 25    |
| 234.7863 | 13.75 | 234.8113 | 20.25 |
| 234.8175 | 10.5  | 234.845  | 25.75 |
| 234.8488 | 11    | 234.88   | 23    |
| 234.8825 | 14.25 | 234.915  | 21.5  |
| 234.915  | 11.5  | 234.9463 | 24.25 |
| 234.9513 | 10.75 | 234.98   | 19.75 |
| 234.9888 | 26.25 | 235.0138 | 27.25 |

|          |       |
|----------|-------|
| 235.0188 | 14    |
| 235.05   | 11.25 |
| 235.08   | 13.5  |
| 235.115  | 15.5  |
| 235.15   | 12.75 |
| 235.1825 | 12.75 |
| 235.22   | 12.5  |
| 235.2538 | 17.5  |
| 235.2863 | 12.25 |
| 235.3175 | 12.5  |
| 235.3488 | 12.25 |
| 235.3825 | 13.75 |
| 235.415  | 12.5  |
| 235.4513 | 13    |
| 235.4888 | 8.25  |
| 235.5188 | 13    |
| 235.55   | 12.75 |
| 235.58   | 10.25 |
| 235.6175 | 13    |
| 235.65   | 12.25 |
| 235.6825 | 11.5  |
| 235.72   | 10.75 |
| 235.7538 | 12.25 |
| 235.7863 | 12.5  |
| 235.8175 | 9.5   |
| 235.8488 | 12.5  |
| 235.8825 | 13.25 |
| 235.915  | 12    |
| 235.9513 | 9     |
| 235.9888 | 14.5  |
| 236.0188 | 11    |
| 236.05   | 12    |
| 236.08   | 12    |
| 236.1175 | 12.5  |
| 236.15   | 11.5  |
| 236.1825 | 17.25 |
| 236.22   | 14    |
| 236.2538 | 15    |
| 236.2863 | 15    |
| 236.3175 | 15.75 |
| 236.3488 | 15.5  |
| 236.3825 | 14    |
| 236.4175 | 13.75 |
| 236.4525 | 14.75 |
| 236.4913 | 17.75 |
| 236.5188 | 17.25 |
| 236.55   | 15    |
| 236.58   | 14    |
| 236.6175 | 14    |
| 236.65   | 14    |

|          |       |
|----------|-------|
| 235.0463 | 25.5  |
| 235.08   | 19    |
| 235.1125 | 18.5  |
| 235.1475 | 24    |
| 235.18   | 19.75 |
| 235.2113 | 18.25 |
| 235.2438 | 22    |
| 235.28   | 24.75 |
| 235.3113 | 24    |
| 235.345  | 18.25 |
| 235.38   | 24.25 |
| 235.415  | 23.25 |
| 235.4463 | 21    |
| 235.48   | 22.25 |
| 235.5113 | 21.25 |
| 235.5475 | 23.5  |
| 235.58   | 21.5  |
| 235.6113 | 21.75 |
| 235.6463 | 24    |
| 235.68   | 23.5  |
| 235.7113 | 23.5  |
| 235.7438 | 20.25 |
| 235.78   | 22.25 |
| 235.8113 | 17.5  |
| 235.845  | 22.5  |
| 235.88   | 22.5  |
| 235.915  | 27.75 |
| 235.9463 | 23.25 |
| 235.98   | 18    |
| 236.0113 | 19.5  |
| 236.0463 | 23.25 |
| 236.08   | 20.25 |
| 236.1113 | 24.5  |
| 236.1463 | 22    |
| 236.18   | 22.75 |
| 236.2138 | 24    |
| 236.2463 | 27.25 |
| 236.2813 | 27.25 |
| 236.3113 | 21.5  |
| 236.345  | 24.25 |
| 236.38   | 25.5  |
| 236.4163 | 28.25 |
| 236.4463 | 25.75 |
| 236.4813 | 25.25 |
| 236.5138 | 27.75 |
| 236.5488 | 22.75 |
| 236.5825 | 26.75 |
| 236.6125 | 23    |
| 236.6488 | 21.5  |
| 236.6813 | 24    |

|          |       |          |       |
|----------|-------|----------|-------|
| 236.6825 | 17.75 | 236.7138 | 23.75 |
| 236.72   | 15    | 236.7525 | 22.5  |
| 236.7538 | 12.25 | 236.7825 | 23    |
| 236.7863 | 11.75 | 236.8138 | 25.5  |
| 236.8188 | 13.25 | 236.8475 | 25.5  |
| 236.8488 | 10.75 | 236.8825 | 26.75 |
| 236.8825 | 13.25 | 236.9188 | 28.75 |
| 236.915  | 14    | 236.9488 | 26.5  |
| 236.95   | 13    | 236.9838 | 30.25 |
| 236.9888 | 12.5  | 237.0138 | 26.25 |
| 237.0188 | 16.25 | 237.0488 | 25.25 |
| 237.05   | 13.5  | 237.0825 | 25.25 |
| 237.0825 | 11.75 | 237.1125 | 25.5  |
| 237.1175 | 13.5  | 237.1488 | 27.75 |
| 237.15   | 16.5  | 237.1813 | 26    |
| 237.1825 | 16.75 | 237.2138 | 22    |
| 237.22   | 13.5  | 237.2475 | 24.25 |
| 237.2538 | 14.25 | 237.2825 | 27    |
| 237.2863 | 11.5  | 237.3138 | 26    |
| 237.3175 | 14.5  | 237.3475 | 24.75 |
| 237.3513 | 11    | 237.3825 | 27.5  |
| 237.3825 | 11.5  | 237.4188 | 30.75 |
| 237.415  | 10.5  | 237.4488 | 26.5  |
| 237.45   | 13    | 237.4838 | 26    |
| 237.4888 | 14.25 | 237.5138 | 26.25 |
| 237.5188 | 11    | 237.5488 | 26.25 |
| 237.55   | 16.5  | 237.5825 | 28.75 |
| 237.5825 | 13.5  | 237.6125 | 22.25 |
| 237.6175 | 14.5  | 237.6488 | 21.75 |
| 237.65   | 15.5  | 237.6813 | 19.5  |
| 237.6825 | 14    | 237.7138 | 25.75 |
| 237.72   | 16.25 | 237.7475 | 24.5  |
| 237.7538 | 16.75 | 237.7813 | 20.25 |
| 237.7863 | 13    | 237.8138 | 26.5  |
| 237.8175 | 16.75 | 237.8475 | 24.75 |
| 237.8513 | 17.25 | 237.8825 | 22    |
| 237.8825 | 19.25 | 237.9188 | 26.25 |
| 237.9125 | 16.25 | 237.9488 | 21.25 |
| 237.9525 | 15    | 237.9838 | 22    |
| 237.9888 | 20.5  | 238.0138 | 28.5  |
| 238.0188 | 15.5  | 238.0488 | 24    |
| 238.05   | 18.75 | 238.0825 | 25.25 |
| 238.0825 | 12.25 | 238.1125 | 19.5  |
| 238.1175 | 17.5  | 238.1513 | 25.75 |
| 238.15   | 13.25 | 238.1813 | 22.75 |
| 238.1825 | 11.5  | 238.2138 | 24    |
| 238.22   | 14.25 | 238.2475 | 22    |
| 238.2538 | 10.25 | 238.2813 | 24    |
| 238.2863 | 12.25 | 238.3138 | 23    |
| 238.3175 | 10.5  | 238.3475 | 28.75 |

|          |       |          |       |
|----------|-------|----------|-------|
| 238.3513 | 11.5  | 238.3825 | 23.75 |
| 238.3825 | 11.75 | 238.4188 | 23.25 |
| 238.4125 | 11.5  | 238.4488 | 21.75 |
| 238.4525 | 13.25 | 238.4838 | 23    |
| 238.4888 | 11    | 238.5138 | 25.25 |
| 238.5188 | 12.75 | 238.5488 | 25.25 |
| 238.55   | 15.25 | 238.5825 | 23.75 |
| 238.5825 | 10    | 238.6125 | 24.5  |
| 238.6175 | 12.25 | 238.6513 | 24    |
| 238.65   | 11    | 238.6813 | 25    |
| 238.6825 | 9.75  | 238.7138 | 22.5  |
| 238.72   | 13.25 | 238.7475 | 27    |
| 238.7538 | 13.5  | 238.7813 | 26.5  |
| 238.7863 | 12    | 238.8138 | 26.75 |
| 238.8175 | 16.5  | 238.8475 | 26    |
| 238.8513 | 10.25 | 238.8825 | 22.25 |
| 238.8825 | 11.25 | 238.9188 | 26.75 |
| 238.9125 | 12.5  | 238.9488 | 25.75 |
| 238.9525 | 13.5  | 238.9838 | 28.75 |
| 238.9888 | 14.75 | 239.0138 | 24.25 |
| 239.0188 | 15.25 | 239.0488 | 25.5  |
| 239.05   | 11.75 | 239.0825 | 25.5  |
| 239.0838 | 12.5  | 239.1125 | 25    |
| 239.1175 | 11    | 239.1513 | 19.5  |
| 239.15   | 12    | 239.1813 | 23.25 |
| 239.1825 | 10    | 239.215  | 21.5  |
| 239.2225 | 13.25 | 239.2475 | 22.5  |
| 239.2538 | 10.25 | 239.2813 | 21.25 |
| 239.2863 | 12.25 | 239.3138 | 22.25 |
| 239.3175 | 16.5  | 239.3475 | 27.75 |
| 239.3538 | 11    | 239.3838 | 23.25 |
| 239.3825 | 10.5  | 239.4188 | 22.5  |
| 239.4125 | 12.75 | 239.4488 | 21.75 |
| 239.4525 | 14.75 | 239.4838 | 23.5  |
| 239.4888 | 11    | 239.5138 | 27.25 |
| 239.5188 | 12.5  | 239.5463 | 25.5  |
| 239.55   | 12.25 | 239.5825 | 26.75 |
| 239.5838 | 11.5  | 239.6125 | 24.5  |
| 239.6175 | 13    | 239.6513 | 21.5  |
| 239.65   | 10.75 | 239.6813 | 25.25 |
| 239.6825 | 11    | 239.715  | 28.75 |
| 239.7188 | 12.5  | 239.7475 | 24    |
| 239.7538 | 10.25 | 239.7813 | 26    |
| 239.7863 | 10    | 239.8138 | 24.5  |
| 239.8188 | 11.25 | 239.8475 | 22    |
| 239.8513 | 11    | 239.8838 | 23.25 |
| 239.8825 | 13    | 239.9188 | 21.5  |
| 239.9125 | 12.5  | 239.9488 | 21.5  |
| 239.9525 | 11.25 | 239.9863 | 27    |
| 239.9888 | 11.25 | 240.0163 | 19.5  |



|          |       |
|----------|-------|
| 240.0188 | 11    |
| 240.05   | 11.5  |
| 240.0838 | 11    |
| 240.1175 | 12.75 |
| 240.15   | 14.25 |
| 240.1838 | 14    |
| 240.2188 | 13    |
| 240.2538 | 13.75 |
| 240.2863 | 16    |
| 240.3188 | 14.25 |
| 240.3513 | 15.75 |
| 240.3825 | 14.75 |
| 240.415  | 15    |
| 240.4525 | 17.5  |
| 240.4888 | 13.25 |
| 240.5188 | 12.5  |
| 240.55   | 15.5  |
| 240.5838 | 15    |
| 240.6175 | 13.5  |
| 240.65   | 14.5  |
| 240.6838 | 13.5  |
| 240.7188 | 14.25 |
| 240.7538 | 10.5  |
| 240.7863 | 18    |
| 240.8188 | 17.75 |
| 240.8513 | 11.75 |
| 240.8825 | 12    |
| 240.9125 | 12.25 |
| 240.9525 | 10.25 |
| 240.9888 | 13.5  |
| 241.0188 | 12    |
| 241.05   | 12    |
| 241.0838 | 11.75 |
| 241.1175 | 12    |
| 241.15   | 13.5  |
| 241.185  | 13.25 |
| 241.2188 | 12.75 |
| 241.2538 | 13.5  |
| 241.2863 | 10.75 |
| 241.3213 | 14.25 |
| 241.3513 | 13.25 |
| 241.3825 | 11.5  |
| 241.4125 | 14.5  |
| 241.4525 | 13.25 |
| 241.4888 | 13.75 |
| 241.52   | 14    |
| 241.5525 | 13.75 |
| 241.5838 | 12.25 |
| 241.6175 | 10.75 |
| 241.65   | 19    |

|          |       |
|----------|-------|
| 240.0463 | 25.75 |
| 240.0825 | 24.5  |
| 240.1125 | 23.5  |
| 240.1513 | 22.5  |
| 240.1813 | 28    |
| 240.2175 | 27.25 |
| 240.2475 | 24.25 |
| 240.2813 | 25    |
| 240.3138 | 23.75 |
| 240.3475 | 21.75 |
| 240.3838 | 26    |
| 240.4188 | 28.5  |
| 240.4488 | 26.25 |
| 240.4838 | 26.75 |
| 240.5163 | 26.25 |
| 240.5488 | 23.25 |
| 240.5825 | 28.75 |
| 240.615  | 24.25 |
| 240.6513 | 24.5  |
| 240.6813 | 26.25 |
| 240.715  | 22.5  |
| 240.7475 | 21.5  |
| 240.7813 | 21.5  |
| 240.8138 | 23.75 |
| 240.8475 | 27.25 |
| 240.8838 | 26.25 |
| 240.9188 | 27.25 |
| 240.95   | 22    |
| 240.9838 | 21.25 |
| 241.0163 | 22.5  |
| 241.0488 | 18.5  |
| 241.0825 | 23.75 |
| 241.1175 | 20.5  |
| 241.1513 | 18    |
| 241.1813 | 18.25 |
| 241.215  | 16.75 |
| 241.2475 | 19    |
| 241.2813 | 18.75 |
| 241.3125 | 15.25 |
| 241.3475 | 16.25 |
| 241.3838 | 19    |
| 241.4188 | 16.25 |
| 241.4538 | 19.25 |
| 241.4838 | 21.5  |
| 241.5163 | 20.5  |
| 241.55   | 19    |
| 241.5825 | 20.25 |
| 241.615  | 19.5  |
| 241.6513 | 21.25 |
| 241.6813 | 16    |

|          |       |          |       |
|----------|-------|----------|-------|
| 241.685  | 12.25 | 241.715  | 19.5  |
| 241.7188 | 13.25 | 241.7475 | 34    |
| 241.7538 | 10.5  | 241.7813 | 39.25 |
| 241.7863 | 13.75 | 241.8125 | 34    |
| 241.8213 | 15.5  | 241.8488 | 38.75 |
| 241.8513 | 12.75 | 241.8838 | 21.5  |
| 241.8825 | 11    | 241.9188 | 33.75 |
| 241.9125 | 11.25 | 241.9513 | 33.75 |
| 241.9525 | 10    | 241.9838 | 34    |
| 241.9888 | 14.25 |          |       |
| 242.0188 | 8     | 242.0488 | 46.5  |
| 242.0525 | 12.75 | 242.0825 | 40.25 |
| 242.0838 | 10.75 | 242.115  | 37.5  |
| 242.1175 | 13    | 242.1538 | 45.5  |
| 242.15   | 10    | 242.1813 | 19.75 |
| 242.185  | 11.25 | 242.215  | 19.75 |
| 242.2175 | 9.5   | 242.2475 | 19.75 |
| 242.2538 | 10    | 242.2813 | 18    |
| 242.2863 | 9.75  | 242.3125 | 40.25 |
| 242.3213 | 11.25 | 242.3488 | 43.25 |
| 242.3513 | 9     | 242.3838 | 27    |
| 242.3825 | 10.75 | 242.4188 | 37.5  |
| 242.415  | 9.5   | 242.4513 | 44.5  |
| 242.4525 | 8.5   |          |       |
| 242.4888 | 10.25 | 242.5188 | 43.25 |
| 242.5188 | 9.75  | 242.5488 | 30.25 |
| 242.5525 | 10.75 | 242.58   | 53.5  |
| 242.5838 | 9     | 242.615  | 47    |
| 242.6175 | 7     | 242.6513 | 42    |
| 242.65   | 9.5   | 242.6813 | 21.25 |
| 242.685  | 10    | 242.715  | 17    |
| 242.7175 | 10.25 | 242.7475 | 15.75 |
| 242.7538 | 8.75  | 242.7813 | 22.5  |
| 242.7863 | 9.75  | 242.8125 | 24.75 |
| 242.8225 | 8.75  | 242.8488 | 15    |
| 242.8513 | 6.5   | 242.8838 | 21    |
| 242.8825 | 7.25  | 242.9188 | 25.5  |
| 242.915  | 9.75  | 242.9513 | 36.5  |
| 242.9525 | 8.75  | 242.9838 | 23    |
| 242.9863 | 6     | 243.0163 | 22.75 |
| 243.0188 | 6.75  | 243.0488 | 35.75 |
| 243.0525 | 9.5   | 243.0825 | 17.5  |
| 243.0838 | 7.5   | 243.115  | 31    |
| 243.1175 | 10    | 243.1513 | 36.5  |
| 243.15   | 8.25  | 243.1838 | 21    |
| 243.185  | 7.25  | 243.215  | 18.75 |
| 243.2175 | 7     | 243.25   | 19.25 |
| 243.2538 | 7     | 243.2825 | 18    |
| 243.2863 | 7     | 243.3125 | 25.25 |
| 243.3213 | 7.25  | 243.3488 | 23.25 |

|          |       |          |       |
|----------|-------|----------|-------|
| 243.3513 | 9.75  | 243.3838 | 14    |
| 243.3825 | 10.75 | 243.4188 | 15.25 |
| 243.415  | 7     | 243.4513 | 12.5  |
| 243.4525 | 6.75  | 243.4838 | 19.75 |
| 243.4863 | 8.25  | 243.5163 | 16    |
| 243.5188 | 6.25  | 243.5488 | 16.25 |
| 243.5538 | 9     | 243.5825 | 19.25 |
| 243.5863 | 9.75  | 243.615  | 18.75 |
| 243.6175 | 11.25 | 243.6538 | 16.5  |
| 243.65   | 9.25  | 243.6838 | 15.25 |
| 243.685  | 10.5  | 243.715  | 17.25 |
| 243.7175 | 9.5   | 243.75   | 21    |
| 243.7538 | 11.75 | 243.7825 | 17.5  |
| 243.7863 | 10.5  | 243.8125 | 16.75 |
| 243.8213 | 10.75 | 243.8488 | 15    |
| 243.8513 | 10.75 | 243.8838 | 13.75 |
| 243.8825 | 12    | 243.9188 | 11.25 |
| 243.915  | 15.5  | 243.9513 | 16.25 |
| 243.95   | 10.5  | 243.9838 | 13.25 |
| 243.9863 | 12.25 | 244.0163 | 14.5  |
| 244.0188 | 10.25 | 244.0488 | 18    |
| 244.0538 | 12.5  | 244.0825 | 16    |
| 244.0838 | 16.5  | 244.115  | 15.75 |
| 244.1175 | 11.75 | 244.1513 | 15    |
| 244.1513 | 10.25 | 244.1838 | 16    |
| 244.185  | 11.75 | 244.215  | 12.25 |
| 244.2175 | 9.75  | 244.25   | 16.75 |
| 244.2538 | 9.75  | 244.2825 | 18.75 |
| 244.2863 | 9     | 244.3175 | 16    |
| 244.3213 | 10    | 244.3475 | 16.5  |
| 244.3513 | 10.5  | 244.385  | 16.5  |
| 244.3825 | 10    | 244.4225 | 21.75 |
| 244.415  | 10.5  | 244.4525 | 15.75 |
| 244.45   | 10.75 | 244.4863 | 16    |
| 244.4863 | 10.25 | 244.5175 | 21    |
| 244.5188 | 10    | 244.55   | 15    |
| 244.5538 | 8.5   | 244.585  | 15.25 |
| 244.5838 | 11.75 | 244.6175 | 18    |
| 244.6175 | 15    | 244.6538 | 18    |
| 244.6513 | 11.5  | 244.6863 | 16.25 |
| 244.685  | 11    | 244.7175 | 19.75 |
| 244.7175 | 15    | 244.755  | 19.25 |
| 244.7538 | 15.75 | 244.785  | 19.75 |
| 244.7875 | 20    | 244.8175 | 15    |
| 244.8213 | 11.25 | 244.8475 | 18    |
| 244.8513 | 16    | 244.885  | 17.25 |
| 244.8825 | 13    | 244.9225 | 14.75 |
| 244.915  | 14    | 244.9525 | 16.75 |
| 244.95   | 16.25 | 244.985  | 15.75 |
| 244.9863 | 13.75 | 245.02   | 18.25 |

|          |       |          |       |
|----------|-------|----------|-------|
| 245.0188 | 14    | 245.05   | 16.5  |
| 245.0538 | 13.75 | 245.085  | 18.5  |
| 245.0838 | 14.5  | 245.1175 | 18.25 |
| 245.1175 | 10.25 | 245.1538 | 17    |
| 245.1513 | 13    | 245.1863 | 17.5  |
| 245.185  | 11    | 245.2175 | 16.5  |
| 245.2175 | 9.75  | 245.2525 | 18.5  |
| 245.2538 | 15.25 | 245.285  | 20    |
| 245.2875 | 11.75 | 245.3175 | 20    |
| 245.3213 | 14    | 245.3475 | 19.25 |
| 245.3513 | 15.75 | 245.385  | 21.75 |
| 245.385  | 12.75 | 245.4225 | 17.5  |
| 245.415  | 10.25 | 245.4525 | 20.5  |
| 245.45   | 12.5  | 245.4888 | 22.5  |
| 245.4863 | 11.75 | 245.5213 | 25.25 |
| 245.5188 | 12.5  | 245.5525 | 22.5  |
| 245.5538 | 15    | 245.5863 | 20.75 |
| 245.5838 | 11    | 245.6188 | 21    |
| 245.6175 | 12.75 | 245.6563 | 21.25 |
| 245.6513 | 11.5  | 245.6888 | 23.75 |
| 245.685  | 13    | 245.72   | 20.75 |
| 245.7175 | 9.25  | 245.7588 | 18.5  |
| 245.7538 | 10.5  | 245.7875 | 23.25 |
| 245.7875 | 12.25 | 245.82   | 17.75 |
| 245.8213 | 10.25 | 245.85   | 21.75 |
| 245.8513 | 8.5   | 245.8875 | 25    |
| 245.885  | 8.25  | 245.9238 | 22.5  |
| 245.915  | 10.75 | 245.9538 | 19.5  |
| 245.95   | 9     | 245.9888 | 24    |
| 245.9863 | 8.25  | 246.0213 | 19.25 |
| 246.0188 | 7.5   | 246.0525 | 20.5  |
| 246.0538 | 9.5   | 246.0863 | 15    |
| 246.0838 | 9.75  | 246.1175 | 21.5  |
| 246.12   | 6.5   | 246.1563 | 20.25 |
| 246.1513 | 5     | 246.1888 | 21.75 |
| 246.185  | 8.75  | 246.22   | 22.75 |
| 246.2175 | 9.25  | 246.255  | 21.25 |
| 246.2538 | 7.25  | 246.2875 | 23.5  |
| 246.29   | 9.75  | 246.32   | 22.5  |
| 246.3213 | 12.5  | 246.3513 | 17.5  |
| 246.3513 | 10    | 246.3875 | 21    |
| 246.385  | 9.75  | 246.4238 | 26.25 |
| 246.4175 | 12.75 | 246.4538 | 25.5  |
| 246.45   | 14    | 246.4888 | 27    |
| 246.4863 | 12.75 | 246.5213 | 23.25 |
| 246.5188 | 12.25 | 246.5525 | 24.5  |
| 246.5538 | 13    | 246.5863 | 28.25 |
| 246.5838 | 11.75 | 246.6175 | 25.25 |
| 246.62   | 10.75 | 246.6563 | 21.5  |
| 246.6513 | 15.25 | 246.6888 | 20.5  |

|          |       |          |       |
|----------|-------|----------|-------|
| 246.685  | 11    | 246.72   | 20    |
| 246.7175 | 12.25 | 246.7575 | 26    |
| 246.7563 | 11.75 | 246.79   | 20    |
| 246.79   | 13.25 | 246.82   | 21    |
| 246.8213 | 11.75 | 246.85   | 23.25 |
| 246.8513 | 14.75 | 246.89   | 26.25 |
| 246.885  | 12    | 246.9238 | 21.5  |
| 246.9175 | 11.25 | 246.9538 | 24.5  |
| 246.95   | 11.5  | 246.9888 | 22    |
| 246.9863 | 11.5  | 247.0213 | 24    |
| 247.0188 | 10.5  | 247.0525 | 18    |
| 247.0538 | 11.5  | 247.0863 | 19.5  |
| 247.0838 | 10.25 | 247.1175 | 21    |
| 247.12   | 15    | 247.1563 | 19.25 |
| 247.1513 | 12.25 | 247.1888 | 21.25 |
| 247.185  | 12    | 247.2213 | 18.75 |
| 247.2163 | 10.75 | 247.2575 | 25.75 |
| 247.2538 | 12.5  | 247.29   | 22    |
| 247.29   | 9.75  | 247.32   | 24    |
| 247.3213 | 10.75 | 247.35   | 23.75 |
| 247.3513 | 10.5  | 247.3875 | 24.75 |
| 247.3875 | 11.25 | 247.4238 | 20.25 |
| 247.4238 | 9.5   | 247.4538 | 23.75 |
| 247.4525 | 7.25  | 247.4888 | 24.5  |
| 247.4888 | 13.75 | 247.5213 | 24.25 |
| 247.5213 | 9.5   | 247.5525 | 26    |
| 247.555  | 11    | 247.5863 | 20.75 |
| 247.585  | 11    | 247.6175 | 25.75 |
| 247.6213 | 16    | 247.6563 | 23.5  |
| 247.6525 | 17.25 | 247.6888 | 25.5  |
| 247.6863 | 9.75  | 247.7213 | 23    |
| 247.7175 | 13.25 | 247.7575 | 21    |
| 247.7538 | 13.25 | 247.79   | 28.25 |
| 247.7925 | 12.75 | 247.82   | 23.25 |
| 247.8238 | 13.5  | 247.85   | 21    |
| 247.8563 | 11.25 | 247.8875 | 22.75 |
| 247.8875 | 12.25 | 247.9238 | 30.75 |
| 247.9225 | 10.75 | 247.9575 | 22.5  |
| 247.9525 | 11.75 | 247.9888 | 23.5  |
| 247.9888 | 13.75 | 248.0225 | 25    |
| 248.0238 | 12    | 248.0525 | 23.25 |
| 248.055  | 12    | 248.0863 | 23.25 |
| 248.085  | 13.5  | 248.1188 | 22    |
| 248.1213 | 12.75 | 248.1563 | 22.25 |
| 248.1525 | 11    | 248.1888 | 24.5  |
| 248.1863 | 13.5  | 248.2213 | 21.25 |
| 248.2175 | 10    | 248.2575 | 18    |
| 248.2538 | 12    | 248.29   | 21.75 |
| 248.2925 | 12.75 | 248.32   | 23    |
| 248.3238 | 11.5  | 248.35   | 18    |

|          |       |          |       |
|----------|-------|----------|-------|
| 248.355  | 11.25 | 248.3875 | 16.75 |
| 248.3875 | 10.25 | 248.4238 | 15.75 |
| 248.4225 | 12.25 | 248.4538 | 16.5  |
| 248.4525 | 10.75 | 248.4888 | 16.5  |
| 248.4888 | 10.25 | 248.5225 | 19.75 |
| 248.5238 | 10    | 248.5525 | 19.25 |
| 248.555  | 9     | 248.5875 | 20.75 |
| 248.585  | 9.5   | 248.62   | 22.25 |
| 248.6213 | 11.25 | 248.6563 | 18.5  |
| 248.6525 | 8.5   | 248.6888 | 16.25 |
| 248.6863 | 12.5  | 248.7213 | 16.75 |
| 248.7175 | 10    | 248.7575 | 17.25 |
| 248.7538 | 10.75 | 248.79   | 20.25 |
| 248.7925 | 12    | 248.82   | 14.75 |
| 248.8238 | 10.25 | 248.85   | 15.5  |
| 248.855  | 10.25 | 248.8875 | 19    |
| 248.8875 | 12.25 | 248.9238 | 19    |
| 248.9225 | 12.75 | 248.9538 | 20.25 |
| 248.9525 | 10.5  | 248.99   | 20.5  |
| 248.9888 | 10.25 | 249.0225 | 18.75 |
| 249.0263 | 12.5  | 249.0525 | 17.75 |
| 249.055  | 11.25 | 249.0863 | 22    |
| 249.0875 | 8.5   | 249.1225 | 17.75 |
| 249.1213 | 10    | 249.1563 | 20.25 |
| 249.1525 | 11.5  | 249.19   | 20.75 |
| 249.1863 | 10.75 | 249.2213 | 21.25 |
| 249.2175 | 13    | 249.2575 | 21.75 |
| 249.2538 | 11.75 | 249.29   | 23.25 |
| 249.2925 | 13.25 | 249.32   | 23.25 |
| 249.3238 | 15.5  | 249.35   | 24.5  |
| 249.355  | 12.5  | 249.3875 | 19.5  |
| 249.3875 | 13.75 | 249.4238 | 21.75 |
| 249.4225 | 12.5  | 249.4538 | 24.5  |
| 249.4525 | 15.25 | 249.49   | 17.25 |
| 249.4888 | 11.25 | 249.5225 | 21.75 |
| 249.5238 | 13    | 249.5525 | 26.25 |
| 249.555  | 12.75 | 249.5863 | 25    |
| 249.5875 | 12.5  | 249.6225 | 23.75 |
| 249.6213 | 10.25 | 249.655  | 28.25 |
| 249.6525 | 10.75 | 249.6888 | 23.5  |
| 249.6863 | 9.25  | 249.7213 | 20.5  |
| 249.72   | 9.5   | 249.76   | 25.75 |
| 249.755  | 12.5  | 249.79   | 27.5  |
| 249.7938 | 10    | 249.82   | 22.75 |
| 249.825  | 10.5  | 249.85   | 25.25 |
| 249.8575 | 9.5   | 249.8875 | 24.25 |
| 249.89   | 10.25 | 249.9238 | 27.5  |
| 249.9238 | 11.5  | 249.9538 | 28.5  |
| 249.9538 | 13    | 249.99   | 27.5  |
| 249.9913 | 14.5  | 250.0225 | 24    |

|          |       |
|----------|-------|
| 250.0263 | 14    |
| 250.0575 | 10.5  |
| 250.09   | 10.75 |
| 250.1225 | 12.25 |
| 250.1563 | 12.5  |
| 250.1888 | 11.5  |
| 250.22   | 11.25 |
| 250.255  | 9.25  |
| 250.2938 | 9.75  |
| 250.3263 | 8.75  |
| 250.3575 | 11.5  |
| 250.39   | 12    |
| 250.4238 | 11.75 |
| 250.4538 | 14.25 |
| 250.4888 | 7     |
| 250.5275 | 12.5  |
| 250.5575 | 12.75 |
| 250.59   | 9.25  |
| 250.6225 | 5.75  |
| 250.6563 | 10.5  |
| 250.6888 | 11.5  |
| 250.7213 | 11.75 |
| 250.755  | 12.75 |
| 250.7938 | 12    |
| 250.8263 | 12.25 |
| 250.8575 | 11.5  |
| 250.89   | 13    |
| 250.9238 | 12.25 |
| 250.9538 | 11.75 |
| 250.9888 | 14.5  |
| 251.025  | 12.75 |
| 251.0575 | 13.25 |
| 251.09   | 15    |
| 251.1225 | 12.5  |
| 251.1563 | 14.25 |
| 251.1888 | 16.5  |
| 251.2213 | 11.5  |
| 251.255  | 11.25 |
| 251.2938 | 13.5  |
| 251.3263 | 13.5  |
| 251.3575 | 10.5  |
| 251.39   | 11.5  |
| 251.4238 | 11.25 |
| 251.4538 | 10.25 |
| 251.4888 | 12.25 |
| 251.525  | 11.25 |
| 251.56   | 8.25  |
| 251.59   | 8.5   |
| 251.6238 | 10    |
| 251.6563 | 9     |

|          |       |
|----------|-------|
| 250.0525 | 31.25 |
| 250.0863 | 25.5  |
| 250.1225 | 30.25 |
| 250.155  | 23.5  |
| 250.1888 | 22.25 |
| 250.2213 | 25.75 |
| 250.26   | 26.25 |
| 250.29   | 24.25 |
| 250.32   | 23.25 |
| 250.3525 | 20    |
| 250.3875 | 23.25 |
| 250.4238 | 23.5  |
| 250.4538 | 21    |
| 250.49   | 23.25 |
| 250.5225 | 22.25 |
| 250.5525 | 18.25 |
| 250.5863 | 21.5  |
| 250.6225 | 21.5  |
| 250.655  | 24.75 |
| 250.6888 | 24    |
| 250.7238 | 25.5  |
| 250.76   | 27    |
| 250.79   | 23    |
| 250.82   | 21.75 |
| 250.8525 | 26.75 |
| 250.8875 | 18.75 |
| 250.9213 | 23    |
| 250.9538 | 22.5  |
| 250.99   | 31.25 |
| 251.025  | 24.25 |
| 251.0525 | 29.25 |
| 251.0863 | 22.75 |
| 251.1225 | 22.75 |
| 251.155  | 26.25 |
| 251.1888 | 17.5  |
| 251.2238 | 22    |
| 251.26   | 16.5  |
| 251.29   | 19.75 |
| 251.32   | 10.75 |
| 251.3525 | 17    |
| 251.3875 | 18.5  |
| 251.4213 | 18.75 |
| 251.4538 | 15.75 |
| 251.4913 | 17.5  |
| 251.5225 | 14    |
| 251.5525 | 15.25 |
| 251.5863 | 17    |
| 251.6225 | 19    |
| 251.655  | 19.75 |
| 251.6888 | 20    |

|          |       |          |       |
|----------|-------|----------|-------|
| 251.6888 | 10    | 251.7238 | 24.25 |
| 251.7213 | 12.75 | 251.76   | 21.25 |
| 251.7575 | 12.25 | 251.79   | 18    |
| 251.7938 | 12    | 251.82   | 21.5  |
| 251.8263 | 12.5  | 251.8525 | 20.5  |
| 251.8575 | 11    | 251.8875 | 18.5  |
| 251.89   | 13.5  | 251.9188 | 21.75 |
| 251.9238 | 14.25 | 251.9538 | 18.75 |
| 251.9538 | 12.75 | 251.9913 | 24    |
| 251.9888 | 11    | 252.0225 | 24    |
| 252.025  | 12    | 252.0525 | 23.25 |
| 252.06   | 13    | 252.0875 | 26.75 |
| 252.0925 | 9.5   | 252.1225 | 24    |
| 252.125  | 11.75 | 252.155  | 26.25 |
| 252.1588 | 11.25 | 252.1888 | 23.75 |
| 252.1913 | 12.25 | 252.2238 | 25.5  |
| 252.2238 | 9.25  | 252.26   | 23.75 |
| 252.26   | 9.25  | 252.29   | 26.25 |
| 252.2975 | 14.25 | 252.32   | 22.25 |
| 252.3288 | 11.75 | 252.3525 | 20    |
| 252.36   | 12.25 | 252.3875 | 23    |
| 252.3913 | 11.75 | 252.4188 | 26    |
| 252.425  | 12    | 252.4538 | 25.75 |
| 252.455  | 11.5  | 252.4913 | 21.75 |
| 252.49   | 10    | 252.5225 | 18.75 |
| 252.5288 | 11    | 252.5525 | 23.75 |
| 252.5613 | 12    | 252.5875 | 16.75 |
| 252.5913 | 16    | 252.6225 | 22    |
| 252.625  | 17.75 | 252.655  | 22.25 |
| 252.6613 | 14.75 | 252.6888 | 18.75 |
| 252.6913 | 16.25 | 252.7238 | 17.75 |
| 252.7238 | 13.75 | 252.76   | 22.75 |
| 252.76   | 13    | 252.7913 | 21.75 |
| 252.7975 | 12.75 | 252.82   | 17.75 |
| 252.8288 | 16    | 252.8525 | 22.75 |
| 252.86   | 14.5  | 252.8875 | 21.25 |
| 252.8913 | 9.75  | 252.9188 | 21.75 |
| 252.925  | 14.75 | 252.955  | 20    |
| 252.955  | 15.75 | 252.9913 | 18.25 |
| 252.99   | 14.75 | 253.0225 | 21.5  |
| 253.0288 | 14.75 | 253.0525 | 19.75 |
| 253.0613 | 15.25 | 253.0875 | 14.5  |
| 253.0913 | 13    | 253.1225 | 21    |
| 253.125  | 14.5  | 253.155  | 19.25 |
| 253.1613 | 13.25 | 253.1875 | 17    |
| 253.1913 | 13.75 | 253.2263 | 22    |
| 253.2238 | 14    | 253.26   | 17.5  |
| 253.2625 | 13.25 | 253.29   | 23.5  |
| 253.2975 | 18.5  | 253.32   | 25    |
| 253.3288 | 14.25 | 253.3525 | 20.75 |



|          |       |          |       |
|----------|-------|----------|-------|
| 253.36   | 13.75 | 253.3875 | 25.75 |
| 253.3913 | 13.5  | 253.4188 | 25    |
| 253.425  | 14    | 253.4575 | 27.25 |
| 253.455  | 10.75 | 253.4913 | 24.5  |
| 253.49   | 12.75 | 253.5225 | 28    |
| 253.5288 | 13.75 | 253.5525 | 29    |
| 253.5613 | 10.75 | 253.5875 | 24.5  |
| 253.5913 | 13.75 | 253.6225 | 23    |
| 253.625  | 10    | 253.655  | 25.25 |
| 253.6613 | 17.25 | 253.69   | 26    |
| 253.6913 | 15.25 | 253.7263 | 22.5  |
| 253.7238 | 15.75 | 253.76   | 25.75 |
| 253.7625 | 15    | 253.79   | 28    |
| 253.7975 | 10.75 | 253.8213 | 26.5  |
| 253.8288 | 13.25 | 253.855  | 25    |
| 253.86   | 11    | 253.8875 | 23    |
| 253.8938 | 13.75 | 253.9188 | 28.5  |
| 253.925  | 10.5  | 253.9575 | 28    |
| 253.955  | 12.25 | 253.9913 | 28.5  |
| 253.99   | 10.5  | 254.025  | 24.75 |
| 254.0288 | 10.25 | 254.0525 | 25.25 |
| 254.0613 | 12.75 | 254.0875 | 27.75 |
| 254.0913 | 10.25 | 254.1225 | 31.75 |
| 254.125  | 13.5  | 254.155  | 26    |
| 254.1613 | 11.5  | 254.1875 | 27.5  |
| 254.1913 | 13    | 254.2263 | 32.5  |
| 254.2238 | 12.25 | 254.26   | 24    |
| 254.265  | 12.5  | 254.29   | 30    |
| 254.2975 | 11.25 | 254.325  | 26.25 |
| 254.3288 | 10.75 | 254.3575 | 28    |
| 254.36   | 10    | 254.39   | 24.75 |
| 254.3913 | 9.25  | 254.4213 | 30.75 |
| 254.425  | 10    | 254.4625 | 30.25 |
| 254.455  | 10.75 | 254.4938 | 28.75 |
| 254.49   | 10.75 | 254.525  | 27.75 |
| 254.5288 | 12.75 | 254.555  | 26.25 |
| 254.5613 | 11.5  | 254.5888 | 25.75 |
| 254.5913 | 11.75 | 254.6238 | 29.5  |
| 254.625  | 12    | 254.6563 | 26.75 |
| 254.6613 | 9.75  | 254.6888 | 21.5  |
| 254.6913 | 9     | 254.7275 | 25    |
| 254.7238 | 11    | 254.7613 | 24.25 |
| 254.765  | 7.25  | 254.7913 | 25.75 |
| 254.7975 | 10    | 254.825  | 25.25 |
| 254.8288 | 9     | 254.8575 | 23.5  |
| 254.86   | 8.75  | 254.89   | 26.5  |
| 254.8913 | 10    | 254.9213 | 26.5  |
| 254.925  | 9.25  | 254.9625 | 24.5  |
| 254.955  | 9.75  | 254.9938 | 26.5  |
| 254.99   | 12.5  | 255.025  | 24    |

|          |       |          |       |
|----------|-------|----------|-------|
| 255.0288 | 11.75 | 255.055  | 21.75 |
| 255.0613 | 11.5  | 255.0888 | 26    |
| 255.0913 | 14.25 | 255.1238 | 26    |
| 255.125  | 10    | 255.1563 | 23.5  |
| 255.1613 | 13    | 255.19   | 24.5  |
| 255.1913 | 10.5  | 255.2275 | 27.75 |
| 255.2238 | 11    | 255.2613 | 25.5  |
| 255.2625 | 9.5   | 255.2913 | 27.75 |
| 255.2975 | 10.75 | 255.325  | 28    |
| 255.3288 | 9     | 255.3575 | 28.5  |
| 255.36   | 10.75 | 255.39   | 27.75 |
| 255.3913 | 10.25 | 255.4213 | 30.5  |
| 255.425  | 9.75  | 255.46   | 21.25 |
| 255.455  | 8.5   | 255.4938 | 24.25 |
| 255.4925 | 8.25  | 255.525  | 24.25 |
| 255.5288 | 10.5  | 255.555  | 24.5  |
| 255.5613 | 13.25 | 255.5888 | 27.75 |
| 255.5913 | 11.5  | 255.6238 | 25.25 |
| 255.625  | 9     | 255.6563 | 25.5  |
| 255.6613 | 9.5   | 255.69   | 28    |
| 255.6913 | 11.5  | 255.7275 | 23    |
| 255.7238 | 10.5  | 255.7613 | 22    |
| 255.7625 | 10.75 | 255.7913 | 26.75 |
| 255.7975 | 12.25 | 255.825  | 26.5  |
| 255.8313 | 11.75 | 255.8575 | 31.5  |
| 255.86   | 11.5  | 255.89   | 21    |
| 255.8938 | 10    | 255.9213 | 26.5  |
| 255.925  | 9     | 255.96   | 26    |
| 255.955  | 9.75  | 255.9938 | 29.25 |
| 255.995  | 12.25 | 256.025  | 28    |
| 256.0288 | 11.75 | 256.055  | 28.75 |
| 256.0613 | 11.5  | 256.0888 | 29.25 |
| 256.0913 | 11.5  | 256.1238 | 28    |
| 256.125  | 10.5  | 256.1563 | 29.5  |
| 256.1613 | 14.25 | 256.19   | 25.5  |
| 256.1913 | 13.5  | 256.2275 | 33.25 |
| 256.2238 | 11.25 | 256.2613 | 28.75 |
| 256.2625 | 11.25 | 256.2938 | 28    |
| 256.2963 | 11.25 | 256.325  | 28.75 |
| 256.3288 | 10.75 | 256.3575 | 23.5  |
| 256.3625 | 11.5  | 256.39   | 25.5  |
| 256.3913 | 13.5  | 256.4213 | 29    |
| 256.425  | 12.75 | 256.46   | 24.25 |
| 256.455  | 10    | 256.4938 | 27.25 |
| 256.495  | 10.75 | 256.525  | 18.25 |
| 256.5288 | 15.5  | 256.555  | 24.75 |
| 256.5613 | 10.5  | 256.59   | 22.75 |
| 256.5913 | 12    | 256.6238 | 20.25 |
| 256.625  | 11.5  | 256.6563 | 22.5  |
| 256.6613 | 12.5  | 256.69   | 20.5  |

|          |       |
|----------|-------|
| 256.6913 | 13.25 |
| 256.725  | 11.5  |
| 256.7625 | 8.5   |
| 256.7963 | 13.25 |
| 256.8288 | 12.25 |
| 256.86   | 9.25  |
| 256.8913 | 10.25 |
| 256.925  | 9     |
| 256.955  | 12    |
| 256.995  | 8.25  |
| 257.03   | 8.75  |
| 257.0613 | 8     |
| 257.0913 | 10.75 |
| 257.125  | 9.25  |
| 257.1613 | 7.5   |
| 257.1913 | 9.75  |
| 257.225  | 9.75  |
| 257.2625 | 12    |
| 257.2963 | 13    |
| 257.3288 | 8     |
| 257.36   | 11    |
| 257.3913 | 9.5   |
| 257.4275 | 13.25 |
| 257.455  | 9.75  |
| 257.495  | 9.25  |
| 257.5288 | 12.5  |
| 257.5613 | 12.25 |
| 257.5913 | 10.5  |
| 257.6275 | 11    |
| 257.6613 | 14.25 |
| 257.6913 | 12.25 |
| 257.725  | 16.75 |
| 257.7625 | 13    |
| 257.7963 | 14.5  |
| 257.8288 | 10.5  |
| 257.86   | 14.75 |
| 257.8913 | 14.25 |
| 257.925  | 11.5  |
| 257.955  | 11.25 |
| 257.995  | 12.25 |
| 258.0288 | 12.25 |
| 258.0613 | 13.25 |
| 258.0913 | 12.5  |
| 258.125  | 11.25 |
| 258.1613 | 11    |
| 258.1913 | 11.75 |
| 258.225  | 8     |
| 258.2625 | 12    |
| 258.2963 | 11.5  |
| 258.3288 | 12    |

|          |       |
|----------|-------|
| 256.7275 | 19    |
| 256.7613 | 21.75 |
| 256.7913 | 25.75 |
| 256.825  | 21.25 |
| 256.86   | 28.25 |
| 256.89   | 25.5  |
| 256.9213 | 23.25 |
| 256.96   | 26    |
| 256.9938 | 25.75 |
| 257.025  | 27.75 |
| 257.0575 | 27.25 |
| 257.09   | 24.75 |
| 257.1238 | 26.25 |
| 257.1563 | 26    |
| 257.19   | 29.5  |
| 257.2263 | 22.75 |
| 257.2613 | 24    |
| 257.2938 | 24.5  |
| 257.325  | 25.25 |
| 257.36   | 25    |
| 257.39   | 29.5  |
| 257.4225 | 29.5  |
| 257.46   | 29.5  |
| 257.4938 | 26    |
| 257.525  | 26    |
| 257.5575 | 25.75 |
| 257.59   | 21    |
| 257.6238 | 24.25 |
| 257.6563 | 23.75 |
| 257.69   | 25.25 |
| 257.7263 | 24    |
| 257.7613 | 27.25 |
| 257.7913 | 25    |
| 257.825  | 28.75 |
| 257.86   | 25.75 |
| 257.89   | 26    |
| 257.9225 | 28.25 |
| 257.96   | 29    |
| 257.9938 | 25.75 |
| 258.025  | 23.25 |
| 258.0575 | 22.5  |
| 258.0925 | 29.25 |
| 258.1238 | 25    |
| 258.1575 | 23.75 |
| 258.1913 | 25.5  |
| 258.2263 | 28.5  |
| 258.2613 | 25.25 |
| 258.2913 | 22.5  |
| 258.3275 | 20.25 |
| 258.36   | 25    |

|          |       |          |       |
|----------|-------|----------|-------|
| 258.36   | 10.75 | 258.39   | 22.75 |
| 258.3913 | 9     | 258.4225 | 24    |
| 258.425  | 12    | 258.46   | 26.25 |
| 258.4575 | 7.5   | 258.4938 | 21.75 |
| 258.495  | 11.25 | 258.525  | 24.25 |
| 258.5288 | 11.5  | 258.5575 | 20.25 |
| 258.5613 | 9.5   | 258.59   | 24    |
| 258.5913 | 9.25  | 258.6238 | 20    |
| 258.625  | 13.75 | 258.6563 | 24.75 |
| 258.6613 | 13.75 | 258.6913 | 23.75 |
| 258.6913 | 9.25  | 258.7263 | 26.25 |
| 258.7275 | 9     | 258.7613 | 22    |
| 258.7625 | 10.75 | 258.7913 | 21    |
| 258.7963 | 9.5   | 258.8275 | 26.5  |
| 258.8288 | 12    | 258.86   | 23.25 |
| 258.86   | 11.75 | 258.89   | 24.75 |
| 258.8913 | 9     | 258.9225 | 23    |
| 258.925  | 9.75  | 258.96   | 26    |
| 258.9575 | 8     | 258.9938 | 28.25 |
| 258.995  | 11.75 | 259.025  | 27.25 |
| 259.0288 | 11.75 | 259.0575 | 28    |
| 259.0613 | 10.25 | 259.09   | 26    |
| 259.0913 | 10.75 | 259.1238 | 25.75 |
| 259.125  | 11.75 | 259.1563 | 27.25 |
| 259.1613 | 12.75 | 259.1913 | 28.5  |
| 259.1913 | 10.75 | 259.2263 | 23.75 |
| 259.2275 | 10.25 | 259.2613 | 22    |
| 259.2625 | 15.5  | 259.2913 | 23.5  |
| 259.2963 | 11.25 | 259.3275 | 25.75 |
| 259.3288 | 13.5  | 259.36   | 24.25 |
| 259.36   | 13.5  | 259.39   | 22.5  |
| 259.3913 | 12.75 | 259.4225 | 24    |
| 259.425  | 10.25 | 259.46   | 26.5  |
| 259.46   | 12.5  | 259.4913 | 21.25 |
| 259.495  | 12.5  | 259.525  | 22.5  |
| 259.5288 | 12.5  | 259.5575 | 25.25 |
| 259.5613 | 9     | 259.59   | 26    |
| 259.5913 | 11.5  | 259.6238 | 22.5  |
| 259.625  | 9     | 259.6563 | 25.5  |
| 259.6613 | 11.25 | 259.6913 | 25.75 |
| 259.6925 | 8.75  | 259.7263 | 24.5  |
| 259.7275 | 11    | 259.7613 | 17    |
| 259.7625 | 10    | 259.7913 | 22.25 |
| 259.7963 | 8.75  | 259.8275 | 27.75 |
| 259.8288 | 11.5  | 259.86   | 23.75 |
| 259.86   | 10    | 259.89   | 22    |
| 259.8938 | 9.5   | 259.9225 | 25.25 |
| 259.9288 | 15.75 | 259.96   | 18.5  |
| 259.9613 | 10.75 | 259.9913 | 20.75 |
| 259.9975 | 11.5  | 260.025  | 20.5  |

|          |       |
|----------|-------|
| 260.0313 | 9.25  |
| 260.0638 | 12.25 |
| 260.0938 | 10.5  |
| 260.1263 | 9.75  |
| 260.1625 | 13.75 |
| 260.195  | 11.5  |
| 260.23   | 9     |
| 260.2638 | 11.5  |
| 260.2975 | 9.25  |
| 260.33   | 11.25 |
| 260.3625 | 11.5  |
| 260.3938 | 12    |
| 260.4288 | 7.25  |
| 260.4613 | 8.5   |
| 260.4975 | 11.75 |
| 260.5313 | 10.75 |
| 260.5638 | 11.5  |
| 260.5938 | 11    |
| 260.6263 | 12.25 |
| 260.6625 | 12.75 |
| 260.695  | 13    |
| 260.73   | 10    |
| 260.7638 | 10.75 |
| 260.7975 | 12    |
| 260.8325 | 11.5  |
| 260.8625 | 10    |
| 260.8938 | 13.25 |
| 260.9288 | 10    |
| 260.9638 | 14.25 |
| 260.9975 | 16.75 |
| 261.0313 | 13.5  |
| 261.0638 | 13.5  |
| 261.0938 | 14    |
| 261.1263 | 15.25 |
| 261.1625 | 9.75  |
| 261.195  | 11.75 |
| 261.2325 | 11.5  |
| 261.2638 | 12.5  |
| 261.2975 | 10.75 |
| 261.33   | 10.75 |
| 261.3625 | 12.75 |
| 261.3938 | 10    |
| 261.4288 | 11.75 |
| 261.4638 | 13.25 |
| 261.4975 | 15.25 |
| 261.5313 | 12.5  |
| 261.5613 | 13.25 |
| 261.5938 | 13.75 |
| 261.6263 | 10.75 |
| 261.665  | 12    |

|          |       |
|----------|-------|
| 260.0575 | 20    |
| 260.09   | 21.5  |
| 260.1238 | 23    |
| 260.1588 | 23    |
| 260.1913 | 15.75 |
| 260.2263 | 17.5  |
| 260.2613 | 20    |
| 260.2913 | 15.5  |
| 260.3275 | 19.25 |
| 260.36   | 16.75 |
| 260.39   | 18.5  |
| 260.4225 | 18.75 |
| 260.46   | 17.75 |
| 260.4913 | 18.75 |
| 260.525  | 22    |
| 260.5588 | 22.25 |
| 260.59   | 20.25 |
| 260.6238 | 15.25 |
| 260.6588 | 17.25 |
| 260.6913 | 20    |
| 260.7263 | 20.25 |
| 260.7613 | 19    |
| 260.7913 | 17    |
| 260.8275 | 15    |
| 260.86   | 22    |
| 260.89   | 20.5  |
| 260.9225 | 16.25 |
| 260.96   | 19.25 |
| 260.9913 | 15.75 |
| 261.025  | 18.75 |
| 261.0588 | 18.75 |
| 261.09   | 19.75 |
| 261.1238 | 21.5  |
| 261.1588 | 21    |
| 261.1913 | 23.75 |
| 261.2263 | 24.25 |
| 261.2588 | 19.5  |
| 261.2913 | 20.25 |
| 261.3275 | 21.5  |
| 261.36   | 21.5  |
| 261.39   | 18.75 |
| 261.4225 | 25.25 |
| 261.4588 | 12    |
| 261.4913 | 20.5  |
| 261.525  | 17.5  |
| 261.5625 | 21.5  |
| 261.59   | 14.25 |
| 261.6238 | 24    |
| 261.6588 | 20.5  |
| 261.6913 | 21.5  |

|          |       |          |       |
|----------|-------|----------|-------|
| 261.695  | 10.75 | 261.7263 | 16.5  |
| 261.7325 | 10.75 | 261.7588 | 23.25 |
| 261.7638 | 12.25 | 261.7913 | 18.25 |
| 261.7975 | 10.75 | 261.8275 | 18.25 |
| 261.83   | 9.75  | 261.86   | 17.25 |
| 261.8625 | 12    | 261.89   | 20.25 |
| 261.8938 | 12    | 261.9225 | 21.75 |
| 261.9288 | 9.25  | 261.9588 | 18.5  |
| 261.9638 | 11.25 | 261.9913 | 24.25 |
| 261.9975 | 11.5  | 262.025  | 20.5  |
| 262.0313 | 8     | 262.0588 | 20.5  |
| 262.0613 | 10.5  | 262.09   | 19.25 |
| 262.0938 | 12.25 | 262.1238 | 19.25 |
| 262.1263 | 9.5   | 262.16   | 20.75 |
| 262.165  | 10.75 | 262.1913 | 23.75 |
| 262.195  | 9.75  | 262.2263 | 20.75 |
| 262.2338 | 11.25 | 262.2588 | 17.75 |
| 262.2638 | 12.75 | 262.2913 | 19    |
| 262.2975 | 12    | 262.3275 | 22.75 |
| 262.33   | 10.5  | 262.3613 | 16.5  |
| 262.3625 | 9.25  | 262.39   | 18.25 |
| 262.3938 | 10.5  | 262.425  | 19    |
| 262.4288 | 10.5  | 262.4588 | 19.5  |
| 262.4638 | 11.75 | 262.4913 | 17.25 |
| 262.5    | 12.25 | 262.5275 | 19.75 |
| 262.5313 | 10.5  | 262.5588 | 19.75 |
| 262.5613 | 10.5  | 262.59   | 22.75 |
| 262.5938 | 8.25  | 262.6238 | 22    |
| 262.6263 | 10.75 | 262.6588 | 20.75 |
| 262.665  | 9     | 262.6913 | 20.75 |
| 262.6963 | 10.25 | 262.7263 | 21.25 |
| 262.7325 | 9     | 262.7588 | 22.5  |
| 262.7688 | 10.25 | 262.7938 | 21.75 |
| 262.8    | 12.25 | 262.8275 | 18.75 |
| 262.8325 | 11.75 | 262.86   | 19.25 |
| 262.865  | 9.25  | 262.8913 | 20.5  |
| 262.8963 | 10    | 262.925  | 19    |
| 262.93   | 12.5  | 262.9588 | 15.25 |
| 262.9675 | 10.5  | 262.9913 | 22.25 |
| 263      | 9.75  | 263.0238 | 26.25 |
| 263.0325 | 12.25 | 263.0588 | 20.5  |
| 263.0625 | 11.75 | 263.09   | 21.25 |
| 263.095  | 11    | 263.1238 | 24.75 |
| 263.1288 | 9.5   | 263.1588 | 24.75 |
| 263.1675 | 12.25 | 263.1913 | 21.5  |
| 263.1988 | 10    | 263.2263 | 27.5  |
| 263.2338 | 11.5  | 263.2588 | 22    |
| 263.2688 | 12.25 | 263.2938 | 19.75 |
| 263.3    | 14.5  | 263.3275 | 20    |
| 263.3325 | 12    | 263.3625 | 18.75 |

|          |       |          |       |
|----------|-------|----------|-------|
| 263.365  | 10.75 | 263.3913 | 22.5  |
| 263.3963 | 11.25 | 263.425  | 26.5  |
| 263.43   | 8.75  | 263.4588 | 23.25 |
| 263.4675 | 8     | 263.4913 | 26.75 |
| 263.5    | 9.25  | 263.5238 | 25.5  |
| 263.5325 | 13    | 263.5588 | 21    |
| 263.5625 | 8     | 263.59   | 24    |
| 263.595  | 13.75 | 263.6238 | 24.75 |
| 263.6288 | 12.25 | 263.6588 | 24.25 |
| 263.6675 | 12    | 263.6913 | 22.5  |
| 263.7    | 11.75 | 263.7263 | 25    |
| 263.7338 | 14.5  | 263.7588 | 25.75 |
| 263.7688 | 14.25 | 263.795  | 24.5  |
| 263.8    | 9.25  | 263.8275 | 19.5  |
| 263.8325 | 11.75 | 263.86   | 20.75 |
| 263.865  | 13    | 263.8913 | 23.5  |
| 263.8963 | 13    | 263.925  | 25.5  |
| 263.93   | 13.75 | 263.9563 | 23    |
| 263.97   | 10    | 263.9913 | 21    |
| 264      | 15.25 | 264.0238 | 23.25 |
| 264.0325 | 13.75 | 264.0588 | 24.75 |
| 264.0625 | 12.75 | 264.09   | 24.25 |
| 264.095  | 11.75 | 264.1238 | 21.75 |
| 264.1288 | 11.25 | 264.1588 | 26.25 |
| 264.1675 | 13    | 264.1913 | 24.25 |
| 264.2    | 14    | 264.2263 | 26    |
| 264.2363 | 11.25 | 264.2588 | 25.5  |
| 264.2688 | 13.25 | 264.2938 | 27.75 |
| 264.3    | 12.75 | 264.3275 | 27.5  |
| 264.3325 | 12.75 | 264.36   | 18.75 |
| 264.365  | 11.25 | 264.3913 | 23.5  |
| 264.3963 | 11.5  | 264.425  | 21    |
| 264.43   | 12.25 | 264.4563 | 22.75 |
| 264.4675 | 13.75 | 264.4913 | 22.25 |
| 264.5    | 10.25 | 264.5238 | 20.75 |
| 264.5325 | 12.5  | 264.5588 | 21.25 |
| 264.5625 | 10.25 | 264.59   | 25.5  |
| 264.595  | 10.5  | 264.6238 | 26.75 |
| 264.6313 | 11.25 | 264.6588 | 29.25 |
| 264.6675 | 10.25 | 264.6913 | 29.75 |
| 264.7    | 15.75 | 264.7263 | 21.75 |
| 264.7338 | 11.5  | 264.7588 | 23.25 |
| 264.7688 | 12.75 | 264.7913 | 26.25 |
| 264.8    | 12    | 264.8275 | 22.25 |
| 264.8325 | 10.75 | 264.86   | 24.5  |
| 264.865  | 15    | 264.8913 | 26.75 |
| 264.8963 | 14.25 | 264.925  | 28.25 |
| 264.9325 | 13.5  | 264.9563 | 28    |
| 264.9675 | 14.75 | 264.9913 | 26.75 |
| 265      | 10.75 | 265.0238 | 25.25 |

|          |       |
|----------|-------|
| 265.0325 | 20.5  |
| 265.0625 | 20.5  |
| 265.095  | 12.25 |
| 265.1313 | 12.75 |
| 265.1675 | 15.5  |
| 265.2    | 17.25 |
| 265.2338 | 15.5  |
| 265.2688 | 11.5  |
| 265.3    | 12.75 |
| 265.3325 | 16    |
| 265.365  | 14    |
| 265.3963 | 14.75 |
| 265.4325 | 12.5  |
| 265.4675 | 10.5  |
| 265.5    | 9     |
| 265.5325 | 9.25  |
| 265.5625 | 11.75 |
| 265.595  | 8.25  |
| 265.6313 | 10    |
| 265.6675 | 11    |
| 265.7    | 11.5  |
| 265.7338 | 34.25 |
| 265.7688 | 30.25 |
| 265.8    | 15.75 |
| 265.83   | 28.5  |
| 265.865  | 15.25 |
| 265.8963 | 13    |
| 265.9325 | 20.75 |
| 265.9675 | 14    |
| 266      | 13.25 |
| 266.0325 | 11.25 |
| 266.0625 | 18.75 |
| 266.095  | 15.5  |
| 266.1313 | 15    |
| 266.1675 | 12    |
| 266.2025 | 16    |
| 266.2338 | 14.25 |
| 266.2688 | 14.5  |
| 266.3    | 13.75 |
| 266.33   | 16.25 |
| 266.3663 | 10.5  |
| 266.3963 | 12    |
| 266.4325 | 10.75 |
| 266.4675 | 10.75 |
| 266.5    | 10.5  |
| 266.5325 | 11.25 |
| 266.5625 | 12    |
| 266.595  | 10.25 |
| 266.6313 | 14.5  |
| 266.6675 | 15.25 |

|          |       |
|----------|-------|
| 265.0588 | 23.5  |
| 265.09   | 24.75 |
| 265.125  | 25.25 |
| 265.1588 | 21.75 |
| 265.1913 | 22    |
| 265.2263 | 24.25 |
| 265.2588 | 22.25 |
| 265.2913 | 21.75 |
| 265.3275 | 28.75 |
| 265.36   | 24    |
| 265.3913 | 28.25 |
| 265.425  | 19.5  |
| 265.4563 | 23.25 |
| 265.4913 | 22.25 |
| 265.525  | 19.25 |
| 265.5588 | 22.75 |
| 265.59   | 22    |
| 265.6263 | 25    |
| 265.6588 | 23.25 |
| 265.6913 | 23.5  |
| 265.7238 | 24    |
| 265.7588 | 29.25 |
| 265.7913 | 26.5  |
| 265.8275 | 24    |
| 265.86   | 26.5  |
| 265.8913 | 22.5  |
| 265.925  | 26    |
| 265.9563 | 24    |
| 265.9913 | 25.5  |
| 266.025  | 22.25 |
| 266.0588 | 22.5  |
| 266.09   | 26.25 |
| 266.1263 | 26    |
| 266.1588 | 27.5  |
| 266.1913 | 25.75 |
| 266.2238 | 27.25 |
| 266.2588 | 25.5  |
| 266.2938 | 25.25 |
| 266.3275 | 31    |
| 266.36   | 25    |
| 266.3913 | 22.25 |
| 266.425  | 23.75 |
| 266.4563 | 27.5  |
| 266.4913 | 23.75 |
| 266.525  | 21.75 |
| 266.5588 | 17.75 |
| 266.59   | 19.75 |
| 266.6263 | 20.5  |
| 266.6588 | 21.75 |
| 266.6913 | 22    |



|          |       |          |       |
|----------|-------|----------|-------|
| 266.7    | 10.75 | 266.7238 | 18.5  |
| 266.7338 | 12    | 266.7588 | 23.5  |
| 266.7688 | 11.25 | 266.7913 | 18.75 |
| 266.8    | 12.5  | 266.8275 | 22    |
| 266.83   | 9     | 266.86   | 20.75 |
| 266.8663 | 12    | 266.8913 | 23.75 |
| 266.8963 | 10.75 | 266.925  | 19.5  |
| 266.9325 | 13.75 | 266.9563 | 22    |
| 266.9675 | 12    | 266.9913 | 19.5  |
| 267      | 10.75 | 267.025  | 19.25 |
| 267.0325 | 10.75 | 267.0575 | 18    |
| 267.0625 | 11.75 | 267.09   | 16.25 |
| 267.095  | 11.5  | 267.1263 | 18.75 |
| 267.1313 | 10.75 | 267.1588 | 18.25 |
| 267.1688 | 14.75 | 267.1913 | 24.5  |
| 267.2    | 15.75 | 267.2238 | 19.5  |
| 267.2338 | 13.5  | 267.2588 | 18.75 |
| 267.2688 | 11.25 | 267.2913 | 17    |
| 267.3    | 13.75 | 267.3275 | 18.5  |
| 267.33   | 9     | 267.36   | 21.75 |
| 267.3663 | 11.75 | 267.3913 | 16.25 |
| 267.3963 | 13.75 | 267.425  | 25.5  |
| 267.435  | 11    | 267.4563 | 23.25 |
| 267.4675 | 11.25 | 267.4913 | 20    |
| 267.5    | 10.5  | 267.525  | 25.75 |
| 267.5325 | 13.25 | 267.5575 | 24.25 |
| 267.5625 | 10.75 | 267.59   | 18    |
| 267.5975 | 12.75 | 267.6263 | 24.75 |
| 267.6313 | 14.25 | 267.6588 | 23.5  |
| 267.6688 | 11.5  | 267.6913 | 25.25 |
| 267.7    | 9.75  | 267.7238 | 20.75 |
| 267.7363 | 14.25 | 267.7588 | 21.75 |
| 267.7713 | 13    | 267.7913 | 25    |
| 267.8025 | 12.25 | 267.8275 | 24.25 |
| 267.835  | 12.75 | 267.86   | 20    |
| 267.8688 | 9.25  | 267.8913 | 19    |
| 267.9    | 13.25 | 267.925  | 22.25 |
| 267.9375 | 12.75 | 267.9563 | 17    |
| 267.97   | 12    | 267.9913 | 18.25 |
| 268.0013 | 10.5  | 268.025  | 17.75 |
| 268.0338 | 9.75  | 268.0575 | 20.25 |
| 268.0638 | 13.25 | 268.09   | 16.75 |
| 268.0988 | 11.75 | 268.1263 | 19.25 |
| 268.1325 | 11.75 | 268.1588 | 21.75 |
| 268.17   | 9.75  | 268.1913 | 19.5  |
| 268.2013 | 15    | 268.2238 | 22    |
| 268.2363 | 13    | 268.2613 | 18.75 |
| 268.2713 | 11    | 268.2925 | 21    |
| 268.3038 | 10.75 | 268.3275 | 18.25 |
| 268.335  | 10.75 | 268.36   | 21.75 |

|          |       |
|----------|-------|
| 268.3688 | 11    |
| 268.4    | 9.75  |
| 268.44   | 10    |
| 268.47   | 9     |
| 268.5013 | 10.25 |
| 268.5338 | 11.25 |
| 268.5638 | 11.75 |
| 268.5988 | 12    |
| 268.6338 | 12    |
| 268.67   | 9.75  |
| 268.7013 | 10    |
| 268.7363 | 10.75 |
| 268.7713 | 10.75 |
| 268.8025 | 11    |
| 268.835  | 12    |
| 268.8688 | 11.25 |
| 268.9025 | 14    |
| 268.9375 | 10.5  |
| 268.9713 | 12    |
| 269.0013 | 11.5  |
| 269.0338 | 8.25  |
| 269.0638 | 11.75 |
| 269.0988 | 11.5  |
| 269.1325 | 10    |
| 269.17   | 9.5   |
| 269.2013 | 11.5  |
| 269.2363 | 10.75 |
| 269.2713 | 9     |
| 269.3025 | 11    |
| 269.335  | 10.75 |
| 269.3688 | 10.5  |
| 269.4    | 10.25 |
| 269.4375 | 8.25  |
| 269.47   | 9     |
| 269.5013 | 10.75 |
| 269.5338 | 10.25 |
| 269.5663 | 10.5  |
| 269.5988 | 8.75  |
| 269.6325 | 9.5   |
| 269.67   | 9.75  |
| 269.7013 | 9.5   |
| 269.7363 | 10.75 |
| 269.7713 | 10    |
| 269.8025 | 8     |
| 269.835  | 8.25  |
| 269.8688 | 8.5   |
| 269.9    | 12.25 |
| 269.9375 | 11    |
| 269.97   | 11.5  |
| 270.0013 | 13.5  |

|          |       |
|----------|-------|
| 268.3913 | 25    |
| 268.425  | 20.75 |
| 268.4563 | 21.5  |
| 268.4913 | 21.25 |
| 268.525  | 20.25 |
| 268.5575 | 25.75 |
| 268.5925 | 21.75 |
| 268.6263 | 22    |
| 268.6588 | 19.25 |
| 268.6913 | 17.75 |
| 268.7225 | 16    |
| 268.7613 | 22.25 |
| 268.7925 | 17.5  |
| 268.8275 | 19.75 |
| 268.86   | 19.25 |
| 268.8913 | 18.5  |
| 268.925  | 17.75 |
| 268.9563 | 20.75 |
| 268.9913 | 21    |
| 269.025  | 17.75 |
| 269.0575 | 18.25 |
| 269.09   | 18    |
| 269.1263 | 16.25 |
| 269.1588 | 18.25 |
| 269.1913 | 20    |
| 269.2225 | 17.25 |
| 269.2613 | 20.25 |
| 269.2925 | 20    |
| 269.3275 | 18.75 |
| 269.3613 | 20    |
| 269.3913 | 18.75 |
| 269.425  | 19.75 |
| 269.4563 | 20.5  |
| 269.4913 | 17.75 |
| 269.525  | 21    |
| 269.5575 | 22.5  |
| 269.59   | 16    |
| 269.6263 | 22.5  |
| 269.6588 | 18    |
| 269.6913 | 18.75 |
| 269.7225 | 21.25 |
| 269.7613 | 20.25 |
| 269.7925 | 19.5  |
| 269.8275 | 17    |
| 269.8613 | 19.75 |
| 269.8913 | 16.75 |
| 269.925  | 19    |
| 269.9563 | 20.5  |
| 269.9913 | 19    |
| 270.025  | 22.25 |

|          |       |
|----------|-------|
| 270.0338 | 7.5   |
| 270.0663 | 11.25 |
| 270.0988 | 12.75 |
| 270.1325 | 9.25  |
| 270.17   | 12    |
| 270.2013 | 10.5  |
| 270.2363 | 12    |
| 270.2713 | 8.25  |
| 270.3025 | 9     |
| 270.335  | 10    |
| 270.3688 | 12    |
| 270.4    | 11    |
| 270.4375 | 13.5  |
| 270.47   | 10.75 |
| 270.5013 | 11.5  |
| 270.5338 | 11    |
| 270.5688 | 12.25 |
| 270.6013 | 10.5  |
| 270.6363 | 12    |
| 270.6713 | 11.25 |
| 270.705  | 12    |
| 270.7388 | 8.25  |
| 270.7738 | 9.25  |
| 270.8038 | 10    |
| 270.8363 | 10    |
| 270.8713 | 7     |
| 270.9025 | 11.25 |
| 270.94   | 10    |
| 270.9713 | 12.25 |
| 271.0038 | 8.5   |
| 271.0363 | 10.25 |
| 271.0688 | 11.25 |
| 271.1013 | 11.5  |
| 271.1363 | 14.25 |
| 271.1713 | 11.5  |
| 271.205  | 15    |
| 271.2388 | 12.25 |
| 271.2725 | 14.75 |
| 271.3038 | 16    |
| 271.3363 | 11.5  |
| 271.3713 | 13    |
| 271.405  | 9.5   |
| 271.44   | 12.25 |
| 271.4713 | 10.25 |
| 271.5038 | 11.5  |
| 271.5363 | 11.5  |
| 271.5688 | 9.5   |
| 271.6013 | 12.5  |
| 271.6363 | 13.25 |
| 271.6725 | 12.75 |

|          |       |
|----------|-------|
| 270.0575 | 22.25 |
| 270.09   | 20.75 |
| 270.1263 | 17    |
| 270.1588 | 21    |
| 270.1913 | 18.25 |
| 270.225  | 18.5  |
| 270.2613 | 21.5  |
| 270.2925 | 16.75 |
| 270.325  | 19.5  |
| 270.3613 | 21.5  |
| 270.3913 | 20.5  |
| 270.425  | 22.5  |
| 270.4563 | 24.5  |
| 270.4913 | 21    |
| 270.525  | 24.5  |
| 270.5575 | 25.25 |
| 270.59   | 21    |
| 270.6263 | 21.75 |
| 270.66   | 23.75 |
| 270.6913 | 25.75 |
| 270.7263 | 19.75 |
| 270.7613 | 22.25 |
| 270.7925 | 19.75 |
| 270.825  | 23.5  |
| 270.8613 | 18.25 |
| 270.8913 | 21.75 |
| 270.925  | 20.75 |
| 270.9575 | 18.5  |
| 270.9925 | 26.25 |
| 271.0275 | 21.25 |
| 271.0575 | 23.75 |
| 271.09   | 22    |
| 271.1263 | 18.75 |
| 271.1588 | 22.75 |
| 271.1913 | 18    |
| 271.225  | 18.5  |
| 271.2613 | 26    |
| 271.2925 | 20.5  |
| 271.325  | 17.75 |
| 271.3613 | 24.5  |
| 271.3913 | 21.25 |
| 271.425  | 19.75 |
| 271.4563 | 19    |
| 271.49   | 17.75 |
| 271.525  | 20.75 |
| 271.5575 | 26.75 |
| 271.59   | 22    |
| 271.6313 | 18.75 |
| 271.6588 | 20.25 |
| 271.6913 | 22.5  |

|          |       |          |       |
|----------|-------|----------|-------|
| 271.705  | 11    | 271.725  | 21.25 |
| 271.7388 | 9.75  | 271.7613 | 19.5  |
| 271.7725 | 9.5   | 271.7925 | 19.25 |
| 271.8038 | 7.5   | 271.825  | 21.5  |
| 271.8363 | 10.75 | 271.8613 | 18.75 |
| 271.8713 | 10    | 271.8913 | 16    |
| 271.905  | 10.75 | 271.9225 | 20.5  |
| 271.94   | 11    | 271.9563 | 17.5  |
| 271.9713 | 11.25 | 271.99   | 16.25 |
| 272.0038 | 11.75 | 272.025  | 18    |
| 272.0363 | 12.5  | 272.0575 | 21.25 |
| 272.0688 | 10.25 | 272.09   | 22.75 |
| 272.1    | 9.25  | 272.1263 | 20.75 |
| 272.1363 | 11.25 | 272.1588 | 21    |
| 272.17   | 13.5  | 272.1913 | 22.5  |
| 272.2075 | 13.75 | 272.225  | 19.25 |
| 272.2388 | 11.75 | 272.2613 | 19.75 |
| 272.2725 | 11.75 | 272.2925 | 16.75 |
| 272.305  | 13.5  | 272.325  | 17.75 |
| 272.3363 | 13.25 | 272.3613 | 20.75 |
| 272.3713 | 10.75 | 272.3913 | 20.75 |
| 272.405  | 10.5  | 272.4225 | 16.75 |
| 272.44   | 11.75 | 272.4563 | 21    |
| 272.4713 | 10.25 | 272.49   | 20.25 |
| 272.5038 | 13.75 | 272.5275 | 23.75 |
| 272.5363 | 13    | 272.5575 | 22.5  |
| 272.5688 | 13.5  | 272.59   | 23.25 |
| 272.6    | 10.5  | 272.6263 | 18.5  |
| 272.6363 | 9.25  | 272.6588 | 20    |
| 272.67   | 11.25 | 272.6913 | 21.5  |
| 272.705  | 14    | 272.725  | 23.25 |
| 272.7388 | 11    | 272.7613 | 17.75 |
| 272.7725 | 9     | 272.7925 | 21.5  |
| 272.805  | 10.25 | 272.8288 | 20.5  |
| 272.8363 | 12.75 | 272.8613 | 21.25 |
| 272.8713 | 11.75 | 272.8938 | 26.5  |
| 272.905  | 8.75  | 272.925  | 22.5  |
| 272.94   | 8.75  | 272.9588 | 23    |
| 272.9713 | 10.75 | 272.995  | 17.5  |
| 273.0038 | 10.5  | 273.03   | 22    |
| 273.0363 | 10.75 | 273.06   | 18.5  |
| 273.0688 | 10.25 | 273.095  | 20.75 |
| 273.1    | 10.25 | 273.1275 | 24.75 |
| 273.1363 | 11    | 273.16   | 19.5  |
| 273.17   | 9     | 273.1925 | 19.75 |
| 273.205  | 8.5   | 273.2288 | 19.75 |
| 273.2388 | 7.5   | 273.2625 | 22.25 |
| 273.27   | 7.25  | 273.2938 | 20.5  |
| 273.305  | 11.25 | 273.3263 | 23.75 |
| 273.3363 | 12.5  | 273.3638 | 20.5  |

|          |       |
|----------|-------|
| 273.3725 | 6.5   |
| 273.405  | 9     |
| 273.44   | 11.5  |
| 273.4713 | 7.5   |
| 273.5038 | 9     |
| 273.5363 | 10.25 |
| 273.5688 | 11.25 |
| 273.6    | 9.5   |
| 273.6363 | 9     |
| 273.67   | 12    |
| 273.705  | 10.25 |
| 273.7388 | 9.75  |
| 273.77   | 9     |
| 273.805  | 8.25  |
| 273.8363 | 8     |
| 273.8725 | 7.75  |
| 273.905  | 9     |
| 273.94   | 9.25  |
| 273.9713 | 5.75  |
| 274.0038 | 6.5   |
| 274.0363 | 5     |
| 274.0688 | 8.5   |
| 274.1    | 9.25  |
| 274.1363 | 6.5   |
| 274.17   | 7.75  |
| 274.205  | 6.75  |
| 274.2388 | 9.5   |
| 274.27   | 6     |
| 274.305  | 10.25 |
| 274.3363 | 9     |
| 274.3725 | 12.25 |
| 274.405  | 10.75 |
| 274.44   | 17.75 |
| 274.4713 | 12.75 |
| 274.5038 | 12    |
| 274.5363 | 15.5  |
| 274.5688 | 13.25 |
| 274.6013 | 15.25 |
| 274.6363 | 15.25 |
| 274.67   | 11    |
| 274.705  | 14    |
| 274.7388 | 11.25 |
| 274.77   | 12.5  |
| 274.805  | 11.25 |
| 274.8363 | 10.75 |
| 274.8725 | 12.75 |
| 274.905  | 20.5  |
| 274.94   | 8.5   |
| 274.9713 | 17    |
| 275.0038 | 13.75 |

|          |       |
|----------|-------|
| 273.3963 | 23    |
| 273.425  | 20.5  |
| 273.4588 | 21.25 |
| 273.4925 | 19    |
| 273.53   | 20.5  |
| 273.56   | 21.75 |
| 273.5938 | 23.25 |
| 273.6275 | 23.75 |
| 273.66   | 21.75 |
| 273.6925 | 22    |
| 273.7288 | 23.5  |
| 273.7625 | 22.25 |
| 273.7938 | 21.25 |
| 273.8263 | 22    |
| 273.8638 | 21.75 |
| 273.8938 | 23.25 |
| 273.925  | 22.5  |
| 273.9588 | 20.75 |
| 273.9925 | 21.5  |
| 274.03   | 24.75 |
| 274.06   | 17.75 |
| 274.0938 | 19.75 |
| 274.1275 | 18.75 |
| 274.16   | 19.75 |
| 274.1925 | 16.75 |
| 274.2288 | 20.25 |
| 274.2625 | 16.5  |
| 274.2938 | 18.75 |
| 274.3263 | 21.75 |
| 274.3613 | 20.5  |
| 274.3938 | 18.5  |
| 274.425  | 21.5  |
| 274.4588 | 19.75 |
| 274.4925 | 19.5  |
| 274.53   | 19.5  |
| 274.56   | 18.75 |
| 274.5938 | 19    |
| 274.6338 | 21    |
| 274.66   | 24    |
| 274.6925 | 21    |
| 274.7288 | 24    |
| 274.7613 | 24.5  |
| 274.7938 | 23.5  |
| 274.8263 | 27.5  |
| 274.8613 | 23    |
| 274.8938 | 25.25 |
| 274.925  | 25.5  |
| 274.9613 | 26    |
| 274.9925 | 23.75 |
| 275.03   | 22.5  |

|          |       |          |       |
|----------|-------|----------|-------|
| 275.0363 | 10    | 275.06   | 20.75 |
| 275.0688 | 11.5  | 275.0938 | 20.75 |
| 275.1    | 9     | 275.1275 | 20.5  |
| 275.1363 | 13.5  | 275.16   | 21.75 |
| 275.17   | 11.5  | 275.1925 | 24.75 |
| 275.205  | 12.5  | 275.2288 | 21.5  |
| 275.2388 | 10.25 | 275.2625 | 22.5  |
| 275.27   | 10.5  | 275.2938 | 16.75 |
| 275.305  | 14    | 275.3263 | 28.5  |
| 275.3363 | 13    | 275.3613 | 26.75 |
| 275.3725 | 10.75 | 275.3938 | 22.75 |
| 275.405  | 14.5  | 275.425  | 26.5  |
| 275.44   | 10    | 275.4613 | 19.5  |
| 275.4713 | 12.25 | 275.4925 | 22    |
| 275.5038 | 14    | 275.53   | 24.25 |
| 275.5363 | 10.5  | 275.56   | 20.5  |
| 275.5688 | 10.25 | 275.5963 | 25.5  |
| 275.6    | 13.25 | 275.63   | 24    |
| 275.6363 | 11    | 275.6625 | 22.75 |
| 275.67   | 9.5   | 275.6938 | 20.25 |
| 275.705  | 10    | 275.73   | 20    |
| 275.7388 | 12    | 275.765  | 18.5  |
| 275.77   | 13.75 | 275.7963 | 22.25 |
| 275.805  | 9     | 275.8275 | 20.25 |
| 275.8363 | 8.5   | 275.8625 | 19.75 |
| 275.8725 | 9.25  | 275.895  | 14.75 |
| 275.9075 | 8.75  | 275.9275 | 21    |
| 275.94   | 8.5   | 275.9638 | 24.5  |
| 275.9713 | 11.75 | 275.9963 | 17.75 |
| 276.0038 | 13.5  | 276.0288 | 26.25 |
| 276.035  | 12.25 | 276.0625 | 25    |
| 276.0688 | 14.5  | 276.0963 | 21.5  |
| 276.1013 | 14.5  | 276.13   | 22.5  |
| 276.1363 | 15.5  | 276.1625 | 25.5  |
| 276.17   | 12.75 | 276.1938 | 26.5  |
| 276.205  | 13    | 276.23   | 22.25 |
| 276.2388 | 15.25 | 276.2663 | 21.5  |
| 276.27   | 18.75 | 276.2963 | 26    |
| 276.305  | 14.25 | 276.3275 | 26.25 |
| 276.3363 | 12    | 276.3625 | 23.25 |
| 276.3725 | 14    | 276.395  | 24    |
| 276.405  | 12.75 | 276.4275 | 21.25 |
| 276.44   | 12.25 | 276.4638 | 20.5  |
| 276.4713 | 11.75 | 276.4963 | 20    |
| 276.5038 | 13.75 | 276.5288 | 25.75 |
| 276.535  | 11.75 | 276.5625 | 25    |
| 276.5688 | 12    | 276.5963 | 22    |
| 276.6013 | 12.5  | 276.63   | 19    |
| 276.6375 | 13.25 | 276.6625 | 19.5  |
| 276.67   | 13.25 | 276.6938 | 25.25 |

|          |       |          |       |
|----------|-------|----------|-------|
| 276.7075 | 10.5  | 276.73   | 25.75 |
| 276.7388 | 14.25 | 276.765  | 22.75 |
| 276.77   | 8.25  | 276.7963 | 17.5  |
| 276.805  | 9     | 276.8325 | 22.25 |
| 276.8363 | 12.75 | 276.86   | 21.75 |
| 276.8725 | 12.5  | 276.895  | 19.25 |
| 276.905  | 13.25 | 276.9275 | 21.75 |
| 276.94   | 11.75 | 276.965  | 21.25 |
| 276.9713 | 13.75 | 276.9963 | 20.75 |
| 277.0038 | 13.25 | 277.0288 | 23.75 |
| 277.0375 | 17.25 | 277.0625 | 22.75 |
| 277.0688 | 14.5  | 277.0963 | 22    |
| 277.1038 | 14.25 | 277.13   | 21    |
| 277.1375 | 15.75 | 277.1625 | 24.75 |
| 277.17   | 14.25 | 277.1938 | 23    |
| 277.205  | 11.75 | 277.23   | 20.25 |
| 277.2388 | 10    | 277.265  | 19.5  |
| 277.27   | 9     | 277.295  | 25    |
| 277.305  | 12.5  | 277.3288 | 22.75 |
| 277.3363 | 10.5  | 277.36   | 23.25 |
| 277.3725 | 10.75 | 277.395  | 22.75 |
| 277.405  | 9     | 277.4275 | 20    |
| 277.44   | 11.25 | 277.465  | 24.5  |
| 277.4713 | 13    | 277.4963 | 19.75 |
| 277.5038 | 14.5  | 277.5288 | 22    |
| 277.5375 | 13.5  | 277.5625 | 20.75 |
| 277.5688 | 13    | 277.5963 | 18.25 |
| 277.6038 | 14.25 | 277.63   | 18    |
| 277.6388 | 13.25 | 277.6625 | 16.25 |
| 277.67   | 15.5  | 277.6938 | 17.5  |
| 277.705  | 16.25 | 277.73   | 20.75 |
| 277.7388 | 13.5  | 277.765  | 18.75 |
| 277.77   | 14.75 | 277.795  | 16.75 |
| 277.805  | 12.25 | 277.8288 | 21.5  |
| 277.8363 | 14.5  | 277.86   | 21    |
| 277.8725 | 12.5  | 277.895  | 20    |
| 277.905  | 12.5  | 277.9275 | 18.25 |
| 277.94   | 12.75 | 277.965  | 21    |
| 277.9713 | 15.75 | 277.9963 | 16    |
| 278.0038 | 11.5  | 278.0313 | 23.75 |
| 278.0375 | 9     | 278.0625 | 20.25 |
| 278.0688 | 9.5   | 278.0963 | 20.5  |
| 278.1038 | 13    | 278.13   | 22.25 |
| 278.1375 | 10.75 | 278.1625 | 17    |
| 278.17   | 11    | 278.1938 | 20.25 |
| 278.205  | 9.5   | 278.23   | 21.25 |
| 278.2388 | 10    | 278.265  | 21    |
| 278.27   | 8.75  | 278.295  | 19    |
| 278.305  | 14.75 | 278.3288 | 21.75 |
| 278.3363 | 12    | 278.36   | 21    |

|          |       |          |       |
|----------|-------|----------|-------|
| 278.3725 | 12.25 | 278.395  | 19.75 |
| 278.405  | 13.25 | 278.4275 | 22.25 |
| 278.4413 | 15    | 278.465  | 22.25 |
| 278.4713 | 9     | 278.4963 | 23.25 |
| 278.5038 | 11    | 278.5288 | 20.5  |
| 278.5375 | 11    | 278.5625 | 23.5  |
| 278.5688 | 12.25 | 278.5963 | 18    |
| 278.6038 | 15.75 | 278.6288 | 18.75 |
| 278.6375 | 15.5  | 278.6625 | 14.5  |
| 278.67   | 14    | 278.6938 | 21.5  |
| 278.705  | 15.25 | 278.7325 | 15    |
| 278.7388 | 15    | 278.765  | 16.75 |
| 278.77   | 13.25 | 278.795  | 14.25 |
| 278.8025 | 12.5  | 278.8288 | 14.25 |
| 278.8363 | 12.75 | 278.86   | 16.75 |
| 278.8738 | 10.5  | 278.895  | 22.75 |
| 278.9075 | 14    | 278.93   | 15    |
| 278.9425 | 14.5  | 278.965  | 21.25 |
| 278.9738 | 8     | 278.9963 | 16.75 |
| 279.0063 | 12.5  | 279.0288 | 14    |
| 279.0388 | 10    | 279.0625 | 14.5  |
| 279.0713 | 12.75 | 279.0963 | 17.5  |
| 279.1063 | 10.25 | 279.1288 | 18.25 |
| 279.14   | 12    | 279.1625 | 18.25 |
| 279.1713 | 11    | 279.1938 | 16.25 |
| 279.2063 | 10.25 | 279.2325 | 15.75 |
| 279.24   | 8.75  | 279.265  | 17.5  |
| 279.2725 | 7.25  | 279.295  | 20    |
| 279.3063 | 9.75  | 279.3288 | 16.5  |
| 279.3375 | 9.5   | 279.36   | 16.75 |
| 279.3738 | 14.75 | 279.395  | 16.5  |
| 279.4075 | 14    | 279.43   | 15.75 |
| 279.4425 | 15.75 | 279.4625 | 16    |
| 279.4738 | 13.75 | 279.4963 | 18.75 |
| 279.5063 | 13.75 | 279.5288 | 18.5  |
| 279.5388 | 14.25 | 279.5625 | 18.75 |
| 279.5738 | 8.75  | 279.5963 | 20.25 |
| 279.6063 | 12.75 | 279.6275 | 17.75 |
| 279.64   | 13.75 | 279.6625 | 17.25 |
| 279.6713 | 15.75 | 279.6938 | 20.75 |
| 279.7063 | 14.5  | 279.7325 | 18.5  |
| 279.74   | 13.5  | 279.765  | 18.75 |
| 279.7725 | 10.75 | 279.795  | 15    |
| 279.8063 | 9.5   | 279.8325 | 23.25 |
| 279.8375 | 10    | 279.86   | 17    |
| 279.8738 | 13.75 | 279.895  | 18.25 |
| 279.9075 | 12.75 | 279.93   | 16.25 |
| 279.9425 | 11.75 | 279.965  | 20.5  |
| 279.9738 | 10    | 279.9963 | 14.25 |
| 280.0063 | 10.25 | 280.0288 | 18    |



|          |       |
|----------|-------|
| 280.0388 | 12.5  |
| 280.0713 | 6.5   |
| 280.1063 | 12    |
| 280.14   | 8.75  |
| 280.1713 | 9     |
| 280.2063 | 7.75  |
| 280.24   | 9     |
| 280.2738 | 8.75  |
| 280.3063 | 7     |
| 280.3375 | 8.25  |
| 280.3738 | 7.75  |
| 280.4075 | 8.5   |
| 280.4425 | 12.25 |
| 280.4738 | 13.5  |
| 280.5063 | 14.5  |
| 280.5388 | 9.75  |
| 280.5725 | 11.5  |
| 280.6063 | 10.5  |
| 280.64   | 12.75 |
| 280.6713 | 9.25  |
| 280.7063 | 9.25  |
| 280.74   | 7.5   |
| 280.7725 | 9.25  |
| 280.805  | 10.25 |
| 280.8375 | 9.25  |
| 280.8763 | 8.25  |
| 280.9075 | 6.5   |
| 280.9425 | 9     |
| 280.9738 | 9.5   |
| 281.0063 | 11.25 |
| 281.0388 | 12.5  |
| 281.0713 | 8.75  |
| 281.1063 | 11    |
| 281.14   | 11.75 |
| 281.1713 | 7.75  |
| 281.2063 | 11    |
| 281.24   | 14.5  |
| 281.2725 | 12    |
| 281.305  | 11    |
| 281.3375 | 12.75 |
| 281.3763 | 9.5   |
| 281.4075 | 10.75 |
| 281.4425 | 7     |
| 281.4738 | 9.25  |
| 281.5063 | 14    |
| 281.5388 | 11.25 |
| 281.5713 | 10    |
| 281.6063 | 9.75  |
| 281.64   | 9.75  |
| 281.6713 | 11.75 |

|          |       |
|----------|-------|
| 280.0625 | 20    |
| 280.0963 | 20.5  |
| 280.1275 | 18.25 |
| 280.1638 | 15.75 |
| 280.1938 | 18.5  |
| 280.2325 | 19.5  |
| 280.265  | 14.5  |
| 280.295  | 17    |
| 280.3275 | 19.25 |
| 280.36   | 17.75 |
| 280.395  | 18.75 |
| 280.43   | 18.5  |
| 280.4625 | 20.25 |
| 280.4963 | 17.5  |
| 280.5288 | 20.75 |
| 280.5625 | 17    |
| 280.5963 | 20    |
| 280.6275 | 18.5  |
| 280.6638 | 21.5  |
| 280.6963 | 19.75 |
| 280.7325 | 16.25 |
| 280.765  | 21.25 |
| 280.7975 | 17    |
| 280.8275 | 19.25 |
| 280.86   | 14.5  |
| 280.895  | 17    |
| 280.93   | 17    |
| 280.9625 | 16.75 |
| 280.9963 | 20.25 |
| 281.0288 | 15.25 |
| 281.0625 | 17.25 |
| 281.0963 | 16.25 |
| 281.1275 | 20.5  |
| 281.1638 | 17.25 |
| 281.1963 | 20.25 |
| 281.2325 | 25.75 |
| 281.265  | 21    |
| 281.2975 | 18.25 |
| 281.3275 | 23.5  |
| 281.36   | 21.5  |
| 281.395  | 25.5  |
| 281.43   | 23.25 |
| 281.4625 | 22.75 |
| 281.4963 | 19.25 |
| 281.5288 | 20.5  |
| 281.565  | 23.5  |
| 281.5938 | 23    |
| 281.6275 | 23.25 |
| 281.6638 | 25.25 |
| 281.6963 | 25.5  |

|          |       |          |       |
|----------|-------|----------|-------|
| 281.7063 | 10.75 | 281.7325 | 26    |
| 281.74   | 9.25  | 281.765  | 22.25 |
| 281.7738 | 13.5  | 281.7975 | 26.75 |
| 281.805  | 9.5   | 281.8275 | 25.25 |
| 281.8375 | 9.75  | 281.86   | 22.5  |
| 281.8763 | 9.5   | 281.8975 | 20.75 |
| 281.9075 | 9.75  | 281.93   | 21    |
| 281.9425 | 10.25 | 281.9625 | 24.5  |
| 281.9738 | 9.25  | 281.9963 | 21.75 |
| 282.0063 | 12    | 282.0288 | 19.5  |
| 282.0388 | 8.5   | 282.065  | 23.75 |
| 282.0713 | 8.5   | 282.0938 | 25.75 |
| 282.1063 | 9.25  | 282.1288 | 23.25 |
| 282.14   | 9.75  | 282.1638 | 20.25 |
| 282.1713 | 11.5  | 282.1963 | 20.75 |
| 282.2063 | 10.25 | 282.2313 | 26.25 |
| 282.24   | 11.75 | 282.265  | 24.5  |
| 282.2738 | 9.75  | 282.2975 | 19    |
| 282.305  | 11.5  | 282.3275 | 21.5  |
| 282.3375 | 12.75 | 282.36   | 23.25 |
| 282.3763 | 12.25 | 282.395  | 23.75 |
| 282.4075 | 12.75 | 282.43   | 22.25 |
| 282.445  | 8     | 282.4625 | 24    |
| 282.4738 | 7.75  | 282.4963 | 20    |
| 282.5063 | 13.5  | 282.53   | 25    |
| 282.5388 | 7.75  | 282.5625 | 21.25 |
| 282.5713 | 10    | 282.5938 | 22.5  |
| 282.6063 | 10    | 282.6275 | 22.5  |
| 282.64   | 7.75  | 282.6638 | 18.5  |
| 282.6713 | 11.5  | 282.6963 | 20    |
| 282.7063 | 10    | 282.7313 | 17    |
| 282.74   | 6.25  | 282.765  | 24.25 |
| 282.7738 | 11    | 282.7975 | 20    |
| 282.805  | 8.25  | 282.8275 | 23.75 |
| 282.8375 | 7.25  | 282.86   | 19.25 |
| 282.8763 | 11    | 282.8925 | 17.5  |
| 282.9075 | 9.75  | 282.93   | 19.5  |
| 282.9425 | 9.25  | 282.9625 | 24    |
| 282.9738 | 8     | 282.9963 | 20.75 |
| 283.0063 | 7.25  | 283.03   | 15.25 |
| 283.0388 | 10.25 | 283.0625 | 21.5  |
| 283.0688 | 8.5   | 283.0938 | 17.75 |
| 283.1063 | 8.25  | 283.1275 | 20.25 |
| 283.14   | 9     | 283.1638 | 19.75 |
| 283.1713 | 6.25  | 283.1963 | 21    |
| 283.2063 | 6.25  | 283.2313 | 19.75 |
| 283.24   | 4.75  | 283.265  | 18.75 |
| 283.2738 | 9.25  | 283.2975 | 17.25 |
| 283.305  | 8.75  | 283.3275 | 18.75 |
| 283.3375 | 6.75  | 283.3575 | 17    |

|          |       |          |       |
|----------|-------|----------|-------|
| 283.3763 | 8.5   | 283.3925 | 22.5  |
| 283.4075 | 11.75 | 283.43   | 22    |
| 283.4425 | 9.75  | 283.4625 | 17.75 |
| 283.4738 | 8     | 283.4963 | 18.75 |
| 283.5063 | 11.75 | 283.53   | 15.5  |
| 283.5388 | 11.75 | 283.5625 | 14    |
| 283.5688 | 9.5   | 283.5938 | 18.25 |
| 283.6038 | 6.75  | 283.6288 | 18.25 |
| 283.64   | 8.5   | 283.6638 | 17.5  |
| 283.6713 | 8.5   | 283.6963 | 16.25 |
| 283.7063 | 8.5   | 283.7313 | 15.25 |
| 283.74   | 12.75 | 283.7675 | 17.75 |
| 283.7738 | 15.5  | 283.7975 | 15.5  |
| 283.805  | 12.25 | 283.8275 | 15    |
| 283.8375 | 10.25 | 283.8575 | 18.75 |
| 283.8763 | 11    | 283.8925 | 17.5  |
| 283.9075 | 9     | 283.93   | 14.5  |
| 283.9425 | 12    | 283.9625 | 20    |
| 283.9738 | 11    | 283.9963 | 19.75 |
| 284.0063 | 12.25 | 284.03   | 15.25 |
| 284.0388 | 12.75 | 284.0625 | 13.75 |
| 284.0688 | 13    | 284.0938 | 16.75 |
| 284.105  | 9.25  | 284.1288 | 16.5  |
| 284.14   | 11    | 284.1638 | 19.75 |
| 284.17   | 12.5  | 284.1963 | 23    |
| 284.2063 | 11.75 | 284.2313 | 17.5  |
| 284.24   | 10.25 | 284.2675 | 15.75 |
| 284.2738 | 8.5   | 284.2975 | 21.25 |
| 284.305  | 11    | 284.3275 | 17.75 |
| 284.3375 | 10.75 | 284.3575 | 21    |
| 284.3763 | 8.25  | 284.395  | 18    |
| 284.4075 | 8     | 284.43   | 22.5  |
| 284.4425 | 10    | 284.4625 | 18.25 |
| 284.4738 | 9     | 284.4938 | 23.75 |
| 284.5088 | 7.5   | 284.53   | 19.75 |
| 284.5388 | 8.75  | 284.5625 | 25    |
| 284.5688 | 7.75  | 284.5938 | 25    |
| 284.605  | 8.5   | 284.6275 | 22.25 |
| 284.64   | 5.75  | 284.6638 | 25.5  |
| 284.67   | 6.5   | 284.6963 | 22.75 |
| 284.7063 | 5.25  | 284.7313 | 24.25 |
| 284.74   | 7.25  | 284.7675 | 24.25 |
| 284.7738 | 5.5   | 284.7975 | 21.75 |
| 284.805  | 5     | 284.8275 | 19.75 |
| 284.8375 | 6     | 284.86   | 20    |
| 284.8763 | 5.5   | 284.8925 | 22.25 |
| 284.9075 | 5.75  | 284.93   | 21.75 |
| 284.9425 | 5     | 284.9625 | 24.25 |
| 284.9738 | 5     | 284.995  | 18    |
| 285.0088 | 7     | 285.03   | 22    |

|          |       |          |       |
|----------|-------|----------|-------|
| 285.0388 | 8     | 285.0625 | 21.5  |
| 285.0688 | 9     | 285.0938 | 22    |
| 285.105  | 5.5   | 285.1275 | 18.5  |
| 285.1425 | 5     | 285.1638 | 18.75 |
| 285.17   | 8     | 285.1963 | 18.5  |
| 285.2063 | 6.5   | 285.2325 | 17.75 |
| 285.24   | 5.75  | 285.27   | 24.5  |
| 285.2738 | 8.75  | 285.3    | 18.5  |
| 285.305  | 6.75  | 285.33   | 16.5  |
| 285.3375 | 5.75  | 285.3625 | 19.25 |
| 285.3763 | 6.5   | 285.395  | 25.25 |
| 285.4075 | 6.5   | 285.4338 | 22.75 |
| 285.4438 | 4.5   | 285.465  | 25    |
| 285.4738 | 6.5   | 285.4975 | 18    |
| 285.5088 | 8     | 285.5313 | 20.25 |
| 285.5388 | 4.75  | 285.5638 | 21    |
| 285.5688 | 4.75  | 285.5975 | 18    |
| 285.605  | 6.75  | 285.6288 | 14.75 |
| 285.64   | 5.75  | 285.6675 | 19.75 |
| 285.67   | 7.75  | 285.6975 | 22.75 |
| 285.7063 | 7     | 285.7325 | 21.25 |
| 285.74   | 6.25  | 285.77   | 22.75 |
| 285.7738 | 7.25  | 285.8    | 18    |
| 285.805  | 6.75  | 285.83   | 15.5  |
| 285.8363 | 10    | 285.8625 | 16.25 |
| 285.8763 | 9.75  | 285.895  | 16.75 |
| 285.9075 | 8     | 285.9338 | 15.75 |
| 285.9438 | 10.75 | 285.965  | 14.5  |
| 285.9738 | 8.25  | 285.9975 | 14.25 |
| 286.0088 | 6     | 286.0313 | 19.25 |
| 286.0388 | 9     | 286.0638 | 12.5  |
| 286.0688 | 9.75  | 286.0975 | 17.25 |
| 286.105  | 7.5   | 286.1288 | 18    |
| 286.14   | 7.25  | 286.1675 | 15    |
| 286.17   | 9.5   | 286.1975 | 16    |
| 286.2063 | 9     | 286.235  | 20.5  |
| 286.24   | 9     | 286.27   | 15.25 |
| 286.2738 | 8.5   | 286.3    | 16.75 |
| 286.305  | 8.25  | 286.33   | 17.5  |
| 286.3363 | 7     | 286.3625 | 16.25 |
| 286.3763 | 9.25  | 286.3925 | 17.75 |
| 286.4075 | 8     | 286.4338 | 14.25 |
| 286.445  | 9.25  | 286.465  | 17    |
| 286.4738 | 10.5  | 286.4975 | 15    |
| 286.5088 | 7     | 286.5313 | 16.5  |
| 286.5388 | 10.75 | 286.5638 | 19.5  |
| 286.5688 | 9.5   | 286.5975 | 16.25 |
| 286.605  | 6.75  | 286.6288 | 18    |
| 286.64   | 8     | 286.6663 | 19.25 |
| 286.67   | 8     | 286.6975 | 16.5  |

|          |       |          |       |
|----------|-------|----------|-------|
| 286.7063 | 7.25  | 286.7325 | 20.5  |
| 286.7413 | 8.5   | 286.7675 | 17    |
| 286.7738 | 8.5   | 286.8    | 20.75 |
| 286.805  | 5.5   | 286.83   | 20    |
| 286.8375 | 4.75  | 286.8625 | 24    |
| 286.8763 | 7     | 286.8925 | 23.75 |
| 286.9075 | 7.75  | 286.9338 | 22.25 |
| 286.9438 | 6.25  | 286.965  | 18.75 |
| 286.9738 | 8.5   | 286.9975 | 19    |
| 287.0088 | 6.75  | 287.0313 | 20.75 |
| 287.0388 | 4.25  | 287.0638 | 22    |
| 287.0688 | 6     | 287.0975 | 18.25 |
| 287.105  | 6.25  | 287.1288 | 15    |
| 287.14   | 7.75  | 287.1638 | 15.5  |
| 287.17   | 3.75  | 287.1975 | 18.25 |
| 287.2063 | 6.25  | 287.2325 | 17.25 |
| 287.2413 | 6     | 287.2675 | 19.5  |
| 287.2738 | 6.75  | 287.3    | 18    |
| 287.305  | 6.25  | 287.33   | 20.25 |
| 287.3375 | 6.5   | 287.3638 | 20.75 |
| 287.3763 | 7     | 287.3925 | 22.25 |
| 287.4075 | 8.5   | 287.4338 | 17    |
| 287.4438 | 5.5   | 287.465  | 18.25 |
| 287.4738 | 5     | 287.4975 | 18.25 |
| 287.5088 | 8.5   | 287.5313 | 18.5  |
| 287.5388 | 8.5   | 287.5638 | 20.5  |
| 287.5688 | 7.25  | 287.5975 | 20.75 |
| 287.605  | 8.25  | 287.6288 | 23    |
| 287.64   | 9     | 287.6638 | 21.25 |
| 287.67   | 10.25 | 287.6975 | 23.5  |
| 287.7063 | 9.5   | 287.7325 | 21.25 |
| 287.7413 | 6.5   | 287.7675 | 22.75 |
| 287.7738 | 7.75  | 287.8    | 17    |
| 287.805  | 7     | 287.8313 | 19.75 |
| 287.8375 | 10    | 287.8625 | 18.75 |
| 287.875  | 7.75  | 287.8925 | 20.5  |
| 287.9075 | 9     | 287.9338 | 18    |
| 287.9438 | 6.75  | 287.9688 | 18.75 |
| 287.9738 | 7.25  | 287.9975 | 20    |
| 288.0088 | 10.75 | 288.0313 | 24.75 |
| 288.0388 | 10.5  | 288.0663 | 22.25 |
| 288.0688 | 8.25  | 288.0975 | 17.75 |
| 288.105  | 9.75  | 288.1288 | 20.25 |
| 288.14   | 9.5   | 288.1638 | 18    |
| 288.17   | 8.5   | 288.1975 | 19.75 |
| 288.2063 | 9.25  | 288.2325 | 24.25 |
| 288.2413 | 10.75 | 288.2675 | 19.25 |
| 288.2738 | 8.5   | 288.3    | 18.5  |
| 288.305  | 7.5   | 288.3313 | 22    |
| 288.3375 | 9.25  | 288.3625 | 20    |

|          |       |          |       |
|----------|-------|----------|-------|
| 288.3775 | 8     | 288.3925 | 20.5  |
| 288.4075 | 6     | 288.4338 | 24    |
| 288.4413 | 6.25  | 288.4663 | 20    |
| 288.4763 | 11.25 | 288.4975 | 22.25 |
| 288.5088 | 8.75  | 288.5313 | 22.5  |
| 288.5388 | 12    | 288.5638 | 19    |
| 288.5688 | 9.5   | 288.5975 | 24    |
| 288.605  | 11    | 288.6288 | 19.25 |
| 288.64   | 9.25  | 288.6625 | 23.5  |
| 288.67   | 8.75  | 288.6975 | 21    |
| 288.7063 | 8.75  | 288.7325 | 20.5  |
| 288.7413 | 11.5  | 288.7675 | 19.25 |
| 288.7738 | 7.25  | 288.8    | 21.75 |
| 288.805  | 9.75  | 288.8313 | 20    |
| 288.84   | 13.5  | 288.8625 | 25.25 |
| 288.8763 | 7.5   | 288.8925 | 17.5  |
| 288.9088 | 10    | 288.9338 | 20.75 |
| 288.9438 | 11.75 | 288.9663 | 23    |
| 288.9813 | 8     | 288.9975 | 18.75 |
| 289.01   | 10    | 289.0313 | 22.25 |
| 289.0425 | 10.25 | 289.0663 | 24.5  |
| 289.07   | 10.5  | 289.0975 | 18.5  |
| 289.1075 | 9.5   | 289.1288 | 14.5  |
| 289.1425 | 10    | 289.1625 | 18.75 |
| 289.1738 | 11.75 | 289.2    | 20.25 |
| 289.2075 | 10    | 289.2325 | 21.75 |
| 289.2438 | 10.25 | 289.2675 | 16.25 |
| 289.2763 | 9.5   | 289.3    | 19.75 |
| 289.3075 | 8.75  | 289.3313 | 22.5  |
| 289.34   | 11.75 | 289.3625 | 13.75 |
| 289.3763 | 11.75 | 289.3925 | 17.5  |
| 289.4113 | 11.25 | 289.4338 | 17    |
| 289.4438 | 13    | 289.4663 | 15.75 |
| 289.4788 | 8.75  | 289.4975 | 17.75 |
| 289.51   | 9.75  | 289.5313 | 16.25 |
| 289.54   | 10.75 | 289.5663 | 15    |
| 289.57   | 11.25 | 289.5975 | 17    |
| 289.6075 | 8.5   | 289.6288 | 16.25 |
| 289.6425 | 8.25  | 289.6625 | 16.75 |
| 289.6738 | 9     | 289.7    | 17.5  |
| 289.7075 | 11.5  | 289.7325 | 19    |
| 289.7438 | 9.5   | 289.7675 | 18.5  |
| 289.7763 | 8     | 289.8    | 19.5  |
| 289.8075 | 8     | 289.8313 | 18.25 |
| 289.84   | 7     | 289.8625 | 18.5  |
| 289.8763 | 9.25  | 289.8925 | 22.75 |
| 289.9113 | 7.25  | 289.9338 | 19.75 |
| 289.9438 | 9.25  | 289.9663 | 19.5  |
| 289.9788 | 8.5   | 289.9975 | 21.25 |
| 290.01   | 9     | 290.0313 | 22    |

|          |       |          |       |
|----------|-------|----------|-------|
| 290.04   | 10    | 290.0663 | 19    |
| 290.0725 | 10.25 | 290.0975 | 20.25 |
| 290.105  | 10.25 | 290.1288 | 19.25 |
| 290.1425 | 11.75 | 290.1625 | 21.75 |
| 290.1738 | 9.5   | 290.2    | 19.75 |
| 290.21   | 9.25  | 290.2325 | 20    |
| 290.2438 | 9.75  | 290.2675 | 19.25 |
| 290.2763 | 11.25 | 290.3    | 22.75 |
| 290.3075 | 11    | 290.3313 | 21.75 |
| 290.34   | 10    | 290.3625 | 16    |
| 290.3763 | 9.25  | 290.3925 | 20    |
| 290.4113 | 9.75  | 290.4363 | 20.75 |
| 290.4425 | 9.75  | 290.4663 | 15    |
| 290.4788 | 11.75 | 290.4975 | 17.25 |
| 290.51   | 9     | 290.5313 | 19.5  |
| 290.54   | 4.75  | 290.5663 | 16.75 |
| 290.5725 | 10.5  | 290.5975 | 19.5  |
| 290.605  | 9.25  | 290.6288 | 17.5  |
| 290.6425 | 12.25 | 290.6625 | 15.75 |
| 290.6738 | 11.25 | 290.7    | 20.5  |
| 290.71   | 13.75 | 290.7325 | 20.25 |
| 290.7438 | 13.75 | 290.7675 | 16.5  |
| 290.7763 | 13.75 | 290.8013 | 24.75 |
| 290.8075 | 13.25 | 290.8313 | 23.75 |
| 290.84   | 11.5  | 290.8625 | 24    |
| 290.8763 | 11.25 | 290.8925 | 21.25 |
| 290.9113 | 11.5  | 290.9338 | 17.25 |
| 290.9425 | 13.25 | 290.9663 | 22    |
| 290.9788 | 9.25  | 290.9975 | 19.25 |
| 291.01   | 11.5  | 291.0313 | 24.25 |
| 291.04   | 9.5   | 291.0688 | 21.75 |
| 291.0725 | 11.25 | 291.0975 | 20.75 |
| 291.105  | 10    | 291.1288 | 20.75 |
| 291.1425 | 9.5   | 291.1625 | 19.5  |
| 291.1738 | 9.5   | 291.2    | 17.5  |
| 291.21   | 10.5  | 291.2363 | 23.25 |
| 291.2463 | 9.75  | 291.2688 | 20.25 |
| 291.2775 | 8.25  | 291.3038 | 24.25 |
| 291.3088 | 11    | 291.3338 | 27.25 |
| 291.3413 | 10.5  | 291.365  | 17.75 |
| 291.3788 | 9.25  | 291.3975 | 21.5  |
| 291.4138 | 10.75 | 291.4325 | 19.25 |
| 291.4475 | 9     | 291.4675 | 18    |
| 291.48   | 10.5  | 291.5    | 20.75 |
| 291.5125 | 7.5   | 291.5338 | 19.25 |
| 291.5425 | 10.5  | 291.5675 | 21    |
| 291.575  | 10.25 | 291.5988 | 19    |
| 291.6075 | 10.5  | 291.63   | 23    |
| 291.645  | 8     | 291.6688 | 25.5  |
| 291.675  | 10.5  | 291.7025 | 21    |

|          |       |          |       |
|----------|-------|----------|-------|
| 291.7125 | 9.75  | 291.7363 | 22.25 |
| 291.7463 | 9.5   | 291.7713 | 25.75 |
| 291.7775 | 10.5  | 291.8038 | 24.25 |
| 291.8113 | 16.25 | 291.8338 | 22.5  |
| 291.8413 | 13    | 291.865  | 22.75 |
| 291.8788 | 11    | 291.8975 | 19    |
| 291.9138 | 11    | 291.9325 | 23.5  |
| 291.9475 | 11.75 | 291.9675 | 20.25 |
| 291.98   | 10.5  | 292      | 16.5  |
| 292.0125 | 9.5   | 292.0363 | 22    |
| 292.0425 | 10    | 292.0675 | 24    |
| 292.075  | 9.5   | 292.0988 | 21    |
| 292.1075 | 12.25 | 292.13   | 23.25 |
| 292.145  | 10.75 | 292.165  | 20.5  |
| 292.1775 | 13    | 292.2025 | 18    |
| 292.2125 | 9     | 292.2363 | 22.5  |
| 292.2463 | 10.75 | 292.2688 | 20.5  |
| 292.2775 | 10    | 292.3038 | 20.5  |
| 292.31   | 12    | 292.3338 | 21.75 |
| 292.3413 | 12.75 | 292.365  | 20.5  |
| 292.3763 | 15    | 292.3975 | 21.5  |
| 292.4138 | 11.75 | 292.4325 | 21.5  |
| 292.4463 | 14.5  | 292.4675 | 21.75 |
| 292.48   | 11    | 292.5    | 28.75 |
| 292.5125 | 11.25 | 292.5363 | 25.75 |
| 292.5425 | 12.25 | 292.5675 | 22    |
| 292.575  | 12    | 292.5988 | 19.5  |
| 292.6075 | 13    | 292.63   | 23.5  |
| 292.645  | 13.25 | 292.6663 | 22.5  |
| 292.675  | 14    | 292.7063 | 23.5  |
| 292.7125 | 15    | 292.7363 | 22    |
| 292.7463 | 12    | 292.7688 | 28    |
| 292.7775 | 12.75 | 292.8038 | 26    |
| 292.81   | 12.25 | 292.8338 | 25.5  |
| 292.8413 | 12.25 | 292.865  | 25.5  |
| 292.8763 | 10.25 | 292.8975 | 25.25 |
| 292.9138 | 13.25 | 292.9313 | 24.5  |
| 292.9463 | 9.75  | 292.9675 | 23.75 |
| 292.98   | 11.75 | 293      | 22    |
| 293.0125 | 12.75 | 293.0363 | 21.5  |
| 293.0425 | 10.5  | 293.0675 | 20.5  |
| 293.075  | 11.5  | 293.0988 | 23    |
| 293.1075 | 11.75 | 293.13   | 16.25 |
| 293.145  | 12.5  | 293.1663 | 19.75 |
| 293.1775 | 12.5  | 293.2013 | 21.5  |
| 293.2125 | 9.75  | 293.2363 | 24    |
| 293.2463 | 11    | 293.2688 | 18.25 |
| 293.2775 | 12    | 293.3038 | 16.75 |
| 293.31   | 12.5  | 293.3338 | 22.25 |
| 293.3413 | 9.5   | 293.365  | 20.75 |



|          |       |
|----------|-------|
| 293.3763 | 10    |
| 293.4138 | 11.25 |
| 293.4463 | 13    |
| 293.48   | 12.5  |
| 293.5138 | 8.5   |
| 293.5425 | 11    |
| 293.575  | 7.5   |
| 293.6075 | 7.5   |
| 293.645  | 10    |
| 293.6775 | 6.5   |
| 293.7125 | 10    |
| 293.7463 | 8     |
| 293.7775 | 7     |
| 293.81   | 10.5  |
| 293.8413 | 9     |
| 293.8763 | 9.75  |
| 293.9138 | 11    |
| 293.9463 | 12    |
| 293.98   | 9.75  |
| 294.0125 | 12    |
| 294.045  | 12    |
| 294.075  | 13    |
| 294.1075 | 8.5   |
| 294.1425 | 9.25  |
| 294.1775 | 10.25 |
| 294.2125 | 12.5  |
| 294.2463 | 12.75 |
| 294.2775 | 9.75  |
| 294.31   | 8.75  |
| 294.3413 | 8.25  |
| 294.3763 | 9     |
| 294.415  | 12.5  |
| 294.4463 | 11.75 |
| 294.48   | 9.25  |
| 294.515  | 12.25 |
| 294.5475 | 7.75  |
| 294.5775 | 10    |
| 294.6113 | 10.25 |
| 294.645  | 11    |
| 294.68   | 11.25 |
| 294.715  | 10.5  |
| 294.7488 | 9.25  |
| 294.7788 | 13    |
| 294.8113 | 12    |
| 294.8425 | 10.5  |
| 294.8788 | 8.75  |
| 294.9163 | 9.25  |
| 294.9488 | 10    |
| 294.9813 | 12.75 |
| 295.015  | 8.75  |

|          |       |
|----------|-------|
| 293.3975 | 16    |
| 293.4313 | 18.75 |
| 293.4675 | 23    |
| 293.5    | 17.5  |
| 293.5363 | 20.5  |
| 293.5675 | 21.75 |
| 293.5988 | 21    |
| 293.63   | 22    |
| 293.6663 | 22.5  |
| 293.7013 | 20.25 |
| 293.7363 | 18.25 |
| 293.7688 | 21    |
| 293.8038 | 25.75 |
| 293.8338 | 25    |
| 293.865  | 18    |
| 293.8975 | 21.5  |
| 293.9313 | 23.5  |
| 293.9675 | 20.5  |
| 294      | 22.75 |
| 294.0363 | 21    |
| 294.0675 | 18.75 |
| 294.0988 | 21    |
| 294.13   | 19.25 |
| 294.1663 | 17    |
| 294.2013 | 16    |
| 294.2363 | 21.25 |
| 294.27   | 20    |
| 294.3038 | 21    |
| 294.3338 | 21    |
| 294.365  | 21.25 |
| 294.3975 | 18.75 |
| 294.4313 | 24.5  |
| 294.4675 | 20    |
| 294.5    | 21    |
| 294.5363 | 21.5  |
| 294.5675 | 20.25 |
| 294.5988 | 18.75 |
| 294.63   | 21.75 |
| 294.6663 | 21.75 |
| 294.7    | 22.5  |
| 294.7363 | 17    |
| 294.77   | 22.25 |
| 294.8038 | 21.5  |
| 294.8338 | 18    |
| 294.865  | 20.5  |
| 294.8975 | 27.25 |
| 294.9313 | 26.5  |
| 294.9675 | 22.25 |
| 295      | 28.5  |
| 295.0363 | 22.5  |

|          |       |
|----------|-------|
| 295.0475 | 10    |
| 295.0775 | 12.5  |
| 295.1113 | 9.75  |
| 295.145  | 8     |
| 295.18   | 9.75  |
| 295.2125 | 8.5   |
| 295.2488 | 9.5   |
| 295.28   | 10.25 |
| 295.3113 | 8.75  |
| 295.3425 | 11.25 |
| 295.3813 | 9.5   |
| 295.4163 | 9.25  |
| 295.4475 | 10.75 |
| 295.4813 | 10    |
| 295.515  | 11    |
| 295.5475 | 10.75 |
| 295.5775 | 10.5  |
| 295.6113 | 10    |
| 295.6475 | 8.25  |
| 295.68   | 10.75 |
| 295.7125 | 8.5   |
| 295.7488 | 9.75  |
| 295.78   | 11.5  |
| 295.8113 | 9.5   |
| 295.8425 | 8.25  |
| 295.8813 | 8.75  |
| 295.9163 | 10.25 |
| 295.9475 | 8     |
| 295.9813 | 11    |
| 296.015  | 12.5  |
| 296.0475 | 11    |
| 296.0775 | 13.75 |
| 296.11   | 12    |
| 296.1475 | 9.25  |
| 296.18   | 11.25 |
| 296.2125 | 10.75 |
| 296.2488 | 10.25 |
| 296.28   | 12.25 |
| 296.3113 | 10.5  |
| 296.3425 | 13.5  |
| 296.3825 | 10.25 |
| 296.4163 | 12.75 |
| 296.4475 | 13    |
| 296.4813 | 13.5  |
| 296.5163 | 10.25 |
| 296.5475 | 12.25 |
| 296.5775 | 12.5  |
| 296.61   | 12.25 |
| 296.6475 | 10.75 |
| 296.68   | 13.25 |

|          |       |
|----------|-------|
| 295.0675 | 21.5  |
| 295.0988 | 21.5  |
| 295.13   | 23.75 |
| 295.1663 | 18.25 |
| 295.2    | 19.25 |
| 295.2363 | 23.25 |
| 295.2713 | 20.5  |
| 295.3038 | 21.25 |
| 295.3338 | 22.25 |
| 295.3663 | 19.25 |
| 295.4    | 20.25 |
| 295.4313 | 22    |
| 295.465  | 23    |
| 295.5    | 24.75 |
| 295.5363 | 21.25 |
| 295.5675 | 18.75 |
| 295.5988 | 17.5  |
| 295.63   | 22.25 |
| 295.6663 | 22.25 |
| 295.7    | 21.5  |
| 295.735  | 20.5  |
| 295.77   | 20.25 |
| 295.8038 | 20    |
| 295.8338 | 19.25 |
| 295.865  | 19.25 |
| 295.9    | 23    |
| 295.9325 | 19.75 |
| 295.965  | 20.75 |
| 296      | 26.25 |
| 296.0363 | 26.25 |
| 296.0675 | 26    |
| 296.0988 | 20    |
| 296.13   | 17.75 |
| 296.1663 | 21.75 |
| 296.2    | 22.25 |
| 296.235  | 22.25 |
| 296.27   | 23    |
| 296.3038 | 23.25 |
| 296.3338 | 23.25 |
| 296.365  | 22.75 |
| 296.4    | 23.75 |
| 296.4325 | 23.25 |
| 296.4625 | 19.25 |
| 296.5025 | 22.25 |
| 296.5388 | 27.25 |
| 296.5675 | 21.5  |
| 296.5988 | 20.75 |
| 296.63   | 25.25 |
| 296.6663 | 25    |
| 296.7    | 19.25 |

|          |       |
|----------|-------|
| 296.7125 | 13.25 |
| 296.7488 | 14    |
| 296.78   | 9     |
| 296.8113 | 12.75 |
| 296.8425 | 10    |
| 296.8825 | 8.5   |
| 296.9163 | 12    |
| 296.9475 | 13.5  |
| 296.9838 | 11    |
| 297.0175 | 11.25 |
| 297.0475 | 14.5  |
| 297.0775 | 10    |
| 297.11   | 13.25 |
| 297.1475 | 12    |
| 297.18   | 11    |
| 297.2125 | 9.75  |
| 297.2488 | 9.75  |
| 297.28   | 13.25 |
| 297.3113 | 11.75 |
| 297.3425 | 7.5   |
| 297.3825 | 12.25 |
| 297.4163 | 8     |
| 297.4475 | 13.5  |
| 297.4813 | 12.5  |
| 297.5175 | 11    |
| 297.5475 | 11    |
| 297.5775 | 11    |
| 297.61   | 10.5  |
| 297.6475 | 10    |
| 297.68   | 10.25 |
| 297.7125 | 11.25 |
| 297.7488 | 11.25 |
| 297.78   | 14.25 |
| 297.8113 | 14    |
| 297.8425 | 13.5  |
| 297.8825 | 14.25 |
| 297.915  | 14    |
| 297.9488 | 15.5  |
| 297.9813 | 13    |
| 298.0175 | 14.5  |
| 298.0475 | 15    |
| 298.0775 | 14.75 |
| 298.1138 | 13.25 |
| 298.1463 | 13    |
| 298.18   | 14    |
| 298.2125 | 12.25 |
| 298.2488 | 12    |
| 298.28   | 9.25  |
| 298.3113 | 12    |
| 298.3425 | 17    |

|          |       |
|----------|-------|
| 296.735  | 22    |
| 296.77   | 20.25 |
| 296.8038 | 19.75 |
| 296.8338 | 19.75 |
| 296.865  | 24.75 |
| 296.9025 | 18    |
| 296.9325 | 22.75 |
| 296.9625 | 23.5  |
| 297.005  | 22.75 |
| 297.0363 | 23    |
| 297.0675 | 18    |
| 297.0988 | 23.5  |
| 297.13   | 23.75 |
| 297.1663 | 19.25 |
| 297.2    | 24    |
| 297.235  | 20.75 |
| 297.27   | 20.5  |
| 297.3038 | 23.25 |
| 297.3338 | 19.25 |
| 297.3675 | 19.5  |
| 297.4    | 21.25 |
| 297.4325 | 19.5  |
| 297.4625 | 23    |
| 297.505  | 21.75 |
| 297.5363 | 23.25 |
| 297.5675 | 21.5  |
| 297.5988 | 18.5  |
| 297.63   | 21.5  |
| 297.6663 | 23.25 |
| 297.7    | 23.75 |
| 297.7338 | 22.75 |
| 297.77   | 26.25 |
| 297.8038 | 22.5  |
| 297.8338 | 16.5  |
| 297.865  | 19.5  |
| 297.9    | 16.75 |
| 297.9325 | 17.25 |
| 297.9625 | 16.75 |
| 298.0025 | 18.5  |
| 298.0363 | 20.25 |
| 298.0675 | 19.5  |
| 298.0988 | 15    |
| 298.13   | 15.5  |
| 298.1663 | 19    |
| 298.2013 | 15.75 |
| 298.2313 | 17.25 |
| 298.27   | 20    |
| 298.3038 | 21.75 |
| 298.3338 | 20.25 |
| 298.365  | 20.5  |

|          |       |          |       |
|----------|-------|----------|-------|
| 298.3825 | 10.75 | 298.4    | 21.25 |
| 298.415  | 12.75 | 298.4325 | 25.75 |
| 298.4475 | 9.75  | 298.465  | 19    |
| 298.4813 | 10.75 | 298.5025 | 20    |
| 298.5175 | 11.75 | 298.535  | 20.75 |
| 298.5475 | 11.25 | 298.5675 | 18.25 |
| 298.5775 | 14    | 298.6013 | 19.75 |
| 298.6138 | 14.5  | 298.6313 | 15    |
| 298.6463 | 15.75 | 298.6663 | 15.5  |
| 298.68   | 14    | 298.7    | 20.5  |
| 298.7125 | 15.5  | 298.7313 | 23    |
| 298.75   | 15.5  | 298.77   | 16.75 |
| 298.78   | 12.75 | 298.8038 | 17    |
| 298.8113 | 10.5  | 298.8338 | 20.5  |
| 298.8425 | 16.75 | 298.865  | 16    |
| 298.8825 | 14.25 | 298.9    | 18    |
| 298.915  | 14.75 | 298.9325 | 21.5  |
| 298.9475 | 11.75 | 298.9625 | 18.5  |
| 298.9813 | 12.75 | 299.0025 | 17.5  |
| 299.0175 | 12    | 299.035  | 18.25 |
| 299.0475 | 11.25 | 299.0675 | 20.75 |
| 299.0775 | 11.5  | 299.0988 | 19    |
| 299.1138 | 11.5  | 299.1313 | 18.5  |
| 299.1463 | 11    | 299.1663 | 17.5  |
| 299.18   | 10.75 | 299.2    | 20.25 |
| 299.2125 | 12.75 | 299.2325 | 18.25 |
| 299.25   | 9.5   | 299.27   | 19.5  |
| 299.28   | 11.5  | 299.3038 | 15    |
| 299.3113 | 12.5  | 299.3338 | 20    |
| 299.3438 | 13    | 299.365  | 19.5  |
| 299.3825 | 11    | 299.4    | 18.5  |
| 299.415  | 12.75 | 299.4325 | 22.25 |
| 299.4475 | 13    | 299.4625 | 19.75 |
| 299.4813 | 10.25 | 299.5013 | 21.25 |
| 299.5188 | 11.5  | 299.5375 | 20.25 |
| 299.5475 | 9     | 299.57   | 22    |
| 299.5775 | 11.5  | 299.6    | 20.25 |
| 299.6138 | 8.25  | 299.6325 | 16.5  |
| 299.6463 | 9.5   | 299.6675 | 17.25 |
| 299.68   | 7.25  | 299.7013 | 18.75 |
| 299.71   | 9.25  | 299.7338 | 19    |
| 299.75   | 9     | 299.7713 | 16.25 |
| 299.78   | 9.25  | 299.805  | 19.5  |
| 299.8113 | 8     | 299.8363 | 18.25 |
| 299.8438 | 10    | 299.8675 | 19.25 |
| 299.8825 | 19    | 299.9025 | 21.25 |
| 299.915  | 7.5   | 299.935  | 15.75 |
|          |       | 299.965  | 18    |
| 299.9813 | 24.5  | 300.005  | 20    |
| 300.0175 | 20    | 300.0375 | 17.25 |

|          |       |          |       |
|----------|-------|----------|-------|
| 300.0475 | 47.5  | 300.07   | 17.5  |
| 300.0775 | 9     | 300.1    | 16.5  |
| 300.1138 | 27.25 | 300.135  | 18.5  |
| 300.1463 | 26.25 | 300.1675 | 19.25 |
| 300.18   | 11    | 300.2013 | 16.5  |
| 300.21   | 31    | 300.235  | 16.25 |
| 300.25   | 16.25 | 300.2713 | 18.25 |
| 300.28   | 10.75 | 300.305  | 16.75 |
| 300.3113 | 21.5  | 300.3363 | 21.25 |
| 300.3438 | 9.75  | 300.3675 | 24.75 |
| 300.3825 | 14.5  | 300.4025 | 18.75 |
| 300.415  | 17    | 300.435  | 19.5  |
| 300.4475 | 10.75 | 300.465  | 21.75 |
| 300.4838 | 12.5  | 300.505  | 26.5  |
| 300.5175 | 11.25 | 300.5375 | 22.25 |
| 300.5475 | 13.25 | 300.57   | 22.5  |
| 300.5775 | 13.5  | 300.6    | 20.75 |
| 300.6138 | 13.75 | 300.635  | 23    |
| 300.6463 | 10    | 300.6675 | 18.25 |
| 300.6775 | 11.75 | 300.7013 | 20.5  |
| 300.7125 | 10.75 | 300.735  | 20.5  |
| 300.75   | 12    | 300.7713 | 26.25 |
| 300.78   | 9.75  | 300.805  | 25    |
| 300.8113 | 10.5  | 300.8363 | 20    |
| 300.8463 | 11.25 | 300.8675 | 25.5  |
| 300.8825 | 7.75  | 300.9025 | 26.25 |
| 300.915  | 10.5  | 300.935  | 26.75 |
| 300.9475 | 13.75 | 300.965  | 19.25 |
| 300.9838 | 12    | 301.0025 | 20.25 |
| 301.0175 | 13.75 | 301.0375 | 17.5  |
| 301.0475 | 11.25 | 301.07   | 19    |
| 301.08   | 9.5   | 301.1    | 18.25 |
| 301.1138 | 11.75 | 301.135  | 17.75 |
| 301.1463 | 11    | 301.1675 | 17.75 |
| 301.1775 | 12.5  | 301.2013 | 17    |
| 301.21   | 11    | 301.235  | 21.75 |
| 301.25   | 13.25 | 301.2713 | 18    |
| 301.28   | 12.5  | 301.305  | 16    |
| 301.3113 | 14.25 | 301.3363 | 17.5  |
| 301.3463 | 9.25  | 301.3675 | 17.75 |
| 301.3825 | 10    | 301.4025 | 25.75 |
| 301.415  | 11.25 | 301.435  | 20.5  |
| 301.4475 | 10.5  | 301.465  | 14.25 |
| 301.4838 | 9.25  | 301.5    | 16.75 |
| 301.5175 | 9     | 301.5375 | 14.75 |
| 301.5475 | 11    | 301.57   | 19.5  |
| 301.58   | 9.75  | 301.6    | 19.5  |
| 301.6138 | 12.25 | 301.635  | 19.25 |
| 301.6463 | 11    | 301.67   | 20.5  |
| 301.6775 | 9.25  | 301.7013 | 21.75 |

|          |       |          |       |
|----------|-------|----------|-------|
| 301.71   | 10.25 | 301.735  | 13.75 |
| 301.75   | 13.25 | 301.7713 | 21.75 |
| 301.78   | 8.75  | 301.805  | 25.25 |
| 301.8113 | 11.25 | 301.8363 | 22.75 |
| 301.8463 | 8     | 301.8675 | 22.75 |
| 301.8825 | 9.75  | 301.9025 | 19.75 |
| 301.915  | 11.75 | 301.935  | 22.75 |
| 301.9475 | 10    | 301.965  | 16.5  |
| 301.9838 | 8.75  | 302      | 19.25 |
| 302.0175 | 14.75 | 302.0375 | 22.75 |
| 302.0475 | 12    | 302.07   | 20.5  |
| 302.08   | 17    | 302.1025 | 17.25 |
| 302.1138 | 14.25 | 302.1375 | 17.75 |
| 302.1463 | 13.75 | 302.1725 | 13.75 |
| 302.1775 | 12.25 | 302.2038 | 16    |
| 302.215  | 15.5  | 302.2375 | 13.75 |
| 302.25   | 20.75 | 302.2738 | 13.5  |
| 302.28   | 11.5  | 302.3075 | 16    |
| 302.3138 | 12.25 | 302.3388 | 18    |
| 302.3463 | 12.75 | 302.3688 | 19    |
| 302.3825 | 13    | 302.4038 | 15    |
| 302.415  | 13.5  | 302.4363 | 19.25 |
| 302.445  | 14.25 | 302.4688 | 21.25 |
| 302.4838 | 9.75  | 302.5013 | 16.75 |
| 302.5175 | 13.5  | 302.5388 | 21    |
| 302.5475 | 12.5  | 302.5713 | 19    |
| 302.58   | 10.75 | 302.6025 | 16.5  |
| 302.6138 | 11    | 302.6375 | 16    |
| 302.6463 | 13.25 | 302.6725 | 14.25 |
| 302.6775 | 12.25 | 302.7038 | 17.25 |
| 302.715  | 13.75 | 302.7375 | 18.5  |
| 302.75   | 13.5  | 302.7725 | 15.5  |
| 302.78   | 13.75 | 302.8075 | 17.25 |
| 302.8138 | 11    | 302.8388 | 17    |
| 302.8463 | 14.75 | 302.8688 | 15.5  |
| 302.8825 | 10.75 | 302.9038 | 19    |
| 302.915  | 11.5  | 302.9363 | 19    |
| 302.945  | 11.5  | 302.9688 | 16.5  |
| 302.9838 | 10.75 | 303.0013 | 14.5  |
| 303.0175 | 12.75 | 303.0388 | 17.25 |
| 303.0475 | 13    | 303.0713 | 17.25 |
| 303.0825 | 15.25 | 303.1025 | 16.5  |
| 303.1138 | 13.5  | 303.1375 | 18.5  |
| 303.1463 | 17    | 303.1725 | 13.75 |
| 303.1775 | 17.5  | 303.2038 | 18.75 |
| 303.215  | 15.75 | 303.2375 | 14.75 |
| 303.25   | 12.25 | 303.2725 | 13.75 |
| 303.28   | 14    | 303.305  | 18.5  |
| 303.3138 | 11.75 | 303.3388 | 18.5  |
| 303.3463 | 13.25 | 303.3688 | 16    |

|          |       |
|----------|-------|
| 303.3825 | 15.75 |
| 303.415  | 13.25 |
| 303.445  | 15    |
| 303.4838 | 16.75 |
| 303.5175 | 14.25 |
| 303.5488 | 14    |
| 303.5825 | 13.25 |
| 303.6138 | 12.25 |
| 303.6463 | 15.25 |
| 303.6775 | 14.75 |
| 303.715  | 12.75 |
| 303.75   | 12    |
| 303.78   | 9.25  |
| 303.8138 | 10.75 |
| 303.8463 | 8     |
| 303.8825 | 11    |
| 303.915  | 12.25 |
| 303.9463 | 10.5  |
| 303.9838 | 12.5  |
| 304.0175 | 13.25 |
| 304.0488 | 12.75 |
| 304.0825 | 13.5  |
| 304.1138 | 11    |
| 304.1463 | 12.5  |
| 304.1775 | 13    |
| 304.2138 | 9.75  |
| 304.25   | 12    |
| 304.28   | 11    |
| 304.3138 | 12.5  |
| 304.3463 | 13.25 |
| 304.3825 | 11.75 |
| 304.415  | 12    |
| 304.4463 | 9     |
| 304.4838 | 12.5  |
| 304.5175 | 10.75 |
| 304.5488 | 11.25 |
| 304.5825 | 11.25 |
| 304.6138 | 10.25 |
| 304.6463 | 12.75 |
| 304.6775 | 13.25 |
| 304.7138 | 13.5  |
| 304.75   | 8     |
| 304.78   | 15.5  |
| 304.8138 | 11.25 |
| 304.8463 | 13.75 |
| 304.8825 | 15.5  |
| 304.915  | 15.5  |
| 304.9463 | 14.5  |
| 304.9838 | 15    |
| 305.0175 | 18    |

|          |       |
|----------|-------|
| 303.4038 | 17    |
| 303.4363 | 16    |
| 303.4688 | 17.5  |
| 303.5013 | 14    |
| 303.5388 | 15.25 |
| 303.5713 | 17    |
| 303.6025 | 15.75 |
| 303.6375 | 20.75 |
| 303.6725 | 18    |
| 303.7038 | 19.75 |
| 303.7375 | 19    |
| 303.77   | 18.5  |
| 303.805  | 19.5  |
| 303.8388 | 21.5  |
| 303.8688 | 25.25 |
| 303.9038 | 27.5  |
| 303.9363 | 22.5  |
| 303.9688 | 30    |
| 304.0013 | 28.75 |
| 304.0363 | 16.5  |
| 304.0713 | 28    |
| 304.1025 | 18.25 |
| 304.1375 | 23.5  |
| 304.1725 | 20.5  |
| 304.2038 | 16    |
| 304.2375 | 21.75 |
| 304.27   | 22.5  |
| 304.305  | 17.5  |
| 304.3388 | 20.5  |
| 304.3713 | 22.25 |
| 304.4038 | 17.5  |
| 304.4363 | 13.75 |
| 304.4688 | 21.75 |
| 304.5013 | 27.25 |
| 304.5363 | 15.5  |
| 304.5713 | 13    |
| 304.6025 | 20.25 |
| 304.6375 | 15.75 |
| 304.6725 | 19.75 |
| 304.7038 | 18    |
| 304.7375 | 18    |
| 304.77   | 15.75 |
| 304.805  | 24.25 |
| 304.8388 | 26    |
| 304.8688 | 18.75 |
| 304.9038 | 20    |
| 304.9363 | 19    |
| 304.9688 | 26    |
| 305.0013 | 18.25 |
| 305.0363 | 27.5  |

|          |       |          |       |
|----------|-------|----------|-------|
| 305.0488 | 15.25 | 305.0713 | 27.25 |
| 305.0825 | 14.75 | 305.1025 | 21.5  |
| 305.1138 | 15.25 | 305.1375 | 19.25 |
| 305.1463 | 14.5  | 305.1725 | 25    |
| 305.1775 | 15    | 305.2038 | 27.5  |
| 305.2138 | 11.25 | 305.2375 | 17.5  |
| 305.25   | 15    | 305.27   | 19    |
| 305.2825 | 14    | 305.305  | 15    |
| 305.3138 | 13    | 305.3388 | 18.5  |
| 305.3463 | 14.25 | 305.3688 | 15.75 |
| 305.3825 | 12.75 | 305.4038 | 19.25 |
| 305.415  | 14.5  | 305.4363 | 19    |
| 305.4463 | 13    | 305.4688 | 34.25 |
| 305.4838 | 16    | 305.5013 | 22.5  |
| 305.5175 | 11.75 | 305.5363 | 17.75 |
| 305.5488 | 14.5  | 305.5713 | 30.25 |
| 305.5825 | 12.75 | 305.6025 | 21.5  |
| 305.6138 | 14.5  | 305.6375 | 29    |
| 305.6463 | 13.25 | 305.6725 | 19.75 |
| 305.68   | 13.5  | 305.7038 | 24    |
| 305.7138 | 18.25 | 305.7375 | 28.5  |
| 305.75   | 14    | 305.77   | 20.75 |
| 305.7825 | 13.5  | 305.8038 | 18    |
| 305.815  | 16.5  | 305.8388 | 23.75 |
| 305.8463 | 12    | 305.8688 | 20    |
| 305.8825 | 12.75 | 305.9038 | 21.25 |
| 305.915  | 13    | 305.9363 | 22.25 |
| 305.9475 | 10.5  | 305.9688 | 22.75 |
| 305.9838 | 11.25 | 306.0013 | 25.25 |
| 306.0175 | 10    | 306.0363 | 21.25 |
| 306.0488 | 14.25 | 306.07   | 22.5  |
| 306.0825 | 12.25 | 306.1025 | 23.75 |
| 306.1138 | 14.25 | 306.1375 | 20.75 |
| 306.1463 | 10.5  | 306.1725 | 24.5  |
| 306.18   | 13.25 | 306.2038 | 30.25 |
| 306.2138 | 13.25 | 306.2388 | 23.5  |
| 306.25   | 12.75 | 306.27   | 22    |
| 306.2825 | 12.25 | 306.3038 | 24    |
| 306.315  | 15    | 306.3388 | 20.5  |
| 306.3463 | 11.75 | 306.37   | 41.75 |
| 306.3825 | 14.5  | 306.4038 | 32.5  |
| 306.415  | 12.5  | 306.4363 | 21.5  |
| 306.4475 | 15.5  | 306.4688 | 20.75 |
| 306.4813 | 15.75 | 306.5038 | 16.5  |
| 306.5188 | 14.25 | 306.5363 | 17    |
| 306.5488 | 15    | 306.57   | 19.25 |
| 306.5825 | 14.25 | 306.6025 | 28.5  |
| 306.6163 | 19    | 306.6363 | 25    |
| 306.6488 | 13    | 306.6725 | 23.5  |
| 306.6813 | 14    | 306.7038 | 16.5  |



|          |       |
|----------|-------|
| 306.7163 | 17    |
| 306.7525 | 14.25 |
| 306.785  | 11.5  |
| 306.8175 | 11.5  |
| 306.8488 | 9.75  |
| 306.885  | 15.75 |
| 306.92   | 12.5  |
| 306.9513 | 14    |
| 306.985  | 10    |
| 307.02   | 11.75 |
| 307.0513 | 13.75 |
| 307.085  | 12.5  |
| 307.1188 | 13    |
| 307.1513 | 12.5  |
| 307.1838 | 10    |
| 307.22   | 11    |
| 307.255  | 11.25 |
| 307.2875 | 10.75 |
| 307.32   | 9.5   |
| 307.3513 | 11.5  |
| 307.385  | 11.25 |
| 307.42   | 8.25  |
| 307.4513 | 10.25 |
| 307.485  | 11.5  |
| 307.5213 | 14.25 |
| 307.5513 | 6.25  |
| 307.5875 | 11.5  |
| 307.6188 | 8.5   |
| 307.6513 | 7.75  |
| 307.6838 | 9.25  |
| 307.72   | 13    |
| 307.7538 | 9.75  |
| 307.7875 | 12.25 |
| 307.82   | 10.5  |
| 307.8513 | 9     |
| 307.885  | 12    |
| 307.9175 | 12    |
| 307.9513 | 9.5   |
| 307.985  | 9.75  |
| 308.0213 | 12.25 |
| 308.0513 | 11.25 |
| 308.085  | 11    |
| 308.1188 | 9.25  |
| 308.1525 | 13.5  |
| 308.1838 | 10.5  |
| 308.22   | 14.25 |
| 308.2538 | 13.5  |
| 308.2875 | 11.25 |
| 308.32   | 12.5  |
| 308.3513 | 14    |

|          |       |
|----------|-------|
| 306.7388 | 24    |
| 306.77   | 19.25 |
| 306.8038 | 18.25 |
| 306.8388 | 24.75 |
| 306.87   | 19    |
| 306.9038 | 20.25 |
| 306.9363 | 26    |
| 306.9688 | 17.75 |
| 307.0013 | 16.25 |
| 307.0375 | 16.25 |
| 307.0675 | 15.25 |
| 307.1025 | 16.5  |
| 307.1363 | 21.25 |
| 307.1725 | 19.5  |
| 307.2038 | 19    |
| 307.2388 | 19.5  |
| 307.27   | 21    |
| 307.3038 | 17.75 |
| 307.3388 | 18.5  |
| 307.37   | 27.25 |
| 307.4038 | 24.75 |
| 307.4363 | 19.25 |
| 307.4688 | 22.5  |
| 307.5013 | 20.5  |
| 307.5363 | 17.5  |
| 307.5675 | 17    |
| 307.6025 | 21.5  |
| 307.6363 | 23    |
| 307.6725 | 20.5  |
| 307.7038 | 17.75 |
| 307.7388 | 19.75 |
| 307.77   | 24    |
| 307.8038 | 33.75 |
| 307.8388 | 38.75 |
| 307.87   | 30.25 |
| 307.9038 | 22.75 |
| 307.9363 | 20.25 |
| 307.9688 | 27.5  |
| 308.0013 | 31.75 |
| 308.0363 | 19.75 |
| 308.0675 | 17.5  |
| 308.1025 | 18.75 |
| 308.1363 | 22.75 |
| 308.1725 | 31    |
| 308.2038 | 28    |
| 308.2388 | 20.25 |
| 308.27   | 16.5  |
| 308.3038 | 18.5  |
| 308.3363 | 21.75 |
| 308.37   | 18.25 |

|          |       |          |       |
|----------|-------|----------|-------|
| 308.385  | 11    | 308.4038 | 19.5  |
| 308.42   | 14.25 | 308.4363 | 20    |
| 308.4538 | 12.75 | 308.4688 | 22.25 |
| 308.485  | 11.5  | 308.5013 | 20    |
| 308.5213 | 13.5  | 308.5363 | 25.5  |
| 308.5513 | 13.75 | 308.5675 | 22.5  |
| 308.585  | 11.25 | 308.6025 | 16.5  |
| 308.6188 | 10.5  | 308.6363 | 31.25 |
| 308.6525 | 10.25 | 308.6725 | 36.25 |
| 308.6838 | 11.75 | 308.7038 | 39.75 |
| 308.72   | 10.25 | 308.7388 | 34.25 |
| 308.7538 | 9     | 308.77   | 18.75 |
| 308.7875 | 8     | 308.8038 | 16.75 |
| 308.82   | 9.25  | 308.8338 | 15.75 |
| 308.8513 | 12.25 | 308.87   | 18.5  |
| 308.885  | 11.25 | 308.9038 | 24    |
| 308.9175 | 12    | 308.9363 | 21.5  |
| 308.9538 | 13.25 | 308.9713 | 21.5  |
| 308.99   | 10    | 309.0013 | 20    |
| 309.0213 | 11.75 | 309.0363 | 20.75 |
| 309.0513 | 12.75 | 309.0675 | 20.25 |
| 309.085  | 11.75 | 309.1025 | 15.25 |
| 309.1188 | 9     | 309.1363 | 21.5  |
| 309.1525 | 13.75 | 309.1725 | 33    |
| 309.1863 | 12.5  | 309.2038 | 21    |
| 309.22   | 12.75 | 309.2388 | 17.5  |
| 309.2538 | 11.75 | 309.27   | 19.75 |
| 309.2875 | 11    | 309.3038 | 17.75 |
| 309.32   | 12.75 | 309.3338 | 21.75 |
| 309.3513 | 6.75  | 309.37   | 20    |
| 309.385  | 9.25  | 309.4063 | 18.25 |
| 309.4175 | 11.25 | 309.4363 | 21.25 |
| 309.4538 | 11.25 | 309.4713 | 17.75 |
| 309.485  | 11    | 309.5013 | 21.75 |
| 309.5188 | 12    | 309.5363 | 18.75 |
| 309.5513 | 12.5  | 309.5675 | 22.25 |
| 309.585  | 7.5   | 309.6025 | 25.75 |
| 309.6188 | 9.75  | 309.6363 | 26    |
| 309.6525 | 11.5  | 309.6725 | 16.5  |
| 309.6863 | 13    | 309.7038 | 21    |
| 309.72   | 11.5  | 309.7388 | 15    |
| 309.7563 | 9.5   | 309.77   | 15.25 |
| 309.79   | 12.5  | 309.8038 | 17.25 |
| 309.82   | 9     | 309.8338 | 18.25 |
| 309.8513 | 9.5   | 309.87   | 22.25 |
| 309.885  | 11.25 | 309.9063 | 13    |
| 309.9175 | 7.25  | 309.9363 | 17.25 |
| 309.9538 | 8.75  | 309.9713 | 16.75 |
| 309.985  | 11.5  | 310.0013 | 20.25 |
| 310.0188 | 8.75  | 310.0363 | 14.5  |

|          |       |
|----------|-------|
| 310.0513 | 11    |
| 310.085  | 10.5  |
| 310.1188 | 9.5   |
| 310.1525 | 8.75  |
| 310.1863 | 10.25 |
| 310.22   | 9.5   |
| 310.2563 | 9     |
| 310.2875 | 9.25  |
| 310.32   | 11.5  |
| 310.3513 | 12.25 |
| 310.385  | 10.25 |
| 310.4175 | 10    |
| 310.4538 | 9.25  |
| 310.485  | 12.25 |
| 310.5188 | 10.5  |
| 310.5513 | 10    |
| 310.585  | 11.25 |
| 310.6188 | 9.75  |
| 310.6525 | 14.25 |
| 310.6863 | 11.75 |
| 310.72   | 9.75  |
| 310.7563 | 12.25 |
| 310.7875 | 16.5  |
| 310.82   | 10.75 |
| 310.8513 | 12.5  |
| 310.885  | 14    |
| 310.9175 | 12.5  |
| 310.9538 | 7.5   |
| 310.985  | 11.5  |
| 311.0188 | 11.75 |
| 311.0513 | 11    |
| 311.085  | 11.75 |
| 311.1188 | 12    |
| 311.1525 | 11.5  |
| 311.1863 | 11    |
| 311.22   | 15.5  |
| 311.2563 | 10    |
| 311.2875 | 10.75 |
| 311.32   | 13.25 |
| 311.3513 | 10.5  |
| 311.385  | 12.5  |
| 311.42   | 10.75 |
| 311.4538 | 13.25 |
| 311.485  | 13.75 |
| 311.5188 | 13.75 |
| 311.5513 | 12.75 |
| 311.585  | 13.25 |
| 311.6188 | 10    |
| 311.6525 | 12.75 |
| 311.6863 | 11.5  |

|          |       |
|----------|-------|
| 310.0675 | 30    |
| 310.1038 | 23    |
| 310.1363 | 32.75 |
| 310.1725 | 24    |
| 310.2038 | 32.25 |
| 310.2388 | 47.75 |
| 310.27   | 28.75 |
| 310.3038 | 17.5  |
| 310.3338 | 22.25 |
| 310.37   | 12.75 |
| 310.4063 | 24.25 |
| 310.4363 | 17.75 |
| 310.4713 | 17    |
| 310.5013 | 18.75 |
| 310.5363 | 22.25 |
| 310.5675 | 38.5  |
| 310.6025 | 29.5  |
| 310.6363 | 20.5  |
| 310.6725 | 14.75 |
| 310.7038 | 16.75 |
| 310.7388 | 21    |
| 310.77   | 30    |
| 310.8038 | 22.75 |
| 310.8338 | 15    |
| 310.87   | 21.75 |
| 310.9063 | 22.75 |
| 310.9363 | 19.75 |
| 310.9713 | 18.25 |
| 311.0013 | 27.75 |
| 311.0363 | 34.25 |
| 311.0675 | 43.25 |
| 311.1025 | 37.25 |
| 311.1363 | 17.5  |
| 311.1725 | 16.75 |
| 311.205  | 23    |
| 311.2388 | 22    |
| 311.27   | 31.25 |
| 311.3038 | 22.75 |
| 311.3338 | 19.75 |
| 311.37   | 17.25 |
| 311.4063 | 17    |
| 311.4363 | 28    |
| 311.4713 | 19    |
| 311.5013 | 18.25 |
| 311.5363 | 24.75 |
| 311.5675 | 24.75 |
| 311.6025 | 25    |
| 311.6363 | 25.75 |
| 311.6725 | 23.5  |
| 311.705  | 24.75 |

|          |       |          |       |
|----------|-------|----------|-------|
| 311.72   | 13.75 | 311.7388 | 24.75 |
| 311.7563 | 10    | 311.77   | 28    |
| 311.7863 | 16.5  | 311.8038 | 29    |
| 311.82   | 14.5  | 311.8338 | 24    |
| 311.8513 | 14    | 311.8675 | 26.5  |
| 311.885  | 15    | 311.9063 | 23.75 |
| 311.9175 | 14.5  | 311.9363 | 33.75 |
| 311.9538 | 16    | 311.9713 | 41    |
| 311.985  | 13.25 | 312.0013 | 36.25 |
| 312.0188 | 14.75 | 312.0363 | 26.75 |
| 312.0513 | 14.5  | 312.0675 | 21.25 |
| 312.085  | 13.75 | 312.1025 | 27.25 |
| 312.1188 | 13.75 | 312.1363 | 26.75 |
| 312.1525 | 10.5  | 312.1725 | 25.75 |
| 312.1863 | 12.5  | 312.2075 | 27    |
| 312.22   | 16    | 312.2388 | 24.25 |
| 312.2563 | 11    | 312.27   | 23.25 |
| 312.2863 | 12.5  | 312.3038 | 33.75 |
| 312.32   | 11    | 312.3338 | 33.5  |
| 312.3513 | 14.5  | 312.3675 | 22    |
| 312.385  | 11.25 | 312.4063 | 19.25 |
| 312.4188 | 11.5  | 312.4363 | 20.5  |
| 312.4538 | 12    | 312.4713 | 22    |
| 312.4863 | 8.75  | 312.5013 | 22    |
| 312.5188 | 14.5  | 312.5363 | 16.5  |
| 312.5513 | 14.25 | 312.5675 | 20.25 |
| 312.585  | 10.75 | 312.6025 | 17    |
| 312.62   | 10.5  | 312.6363 | 25.5  |
| 312.6525 | 9     | 312.6725 | 23.25 |
| 312.6863 | 11.25 | 312.7075 | 19    |
| 312.72   | 11.5  | 312.7388 | 17.5  |
| 312.7563 | 7     | 312.77   | 18.5  |
| 312.7863 | 10    | 312.8038 | 22    |
| 312.82   | 10.5  | 312.8338 | 18    |
| 312.8513 | 8.25  | 312.865  | 24    |
| 312.885  | 6.5   | 312.9088 | 20.75 |
| 312.9188 | 8     | 312.9363 | 27.5  |
| 312.9538 | 8.25  | 312.9713 | 26.75 |
| 312.9863 | 7.25  | 313.0013 | 23.75 |
| 313.0188 | 9.25  | 313.0363 | 19.75 |
| 313.0513 | 11    | 313.0675 | 23.5  |
| 313.0875 | 8.5   | 313.1025 | 19.75 |
| 313.1213 | 9.25  | 313.135  | 20.75 |
| 313.1538 | 11    | 313.1725 | 21.5  |
| 313.19   | 8.75  | 313.2075 | 22.25 |
| 313.2225 | 9.75  | 313.24   | 17    |
| 313.26   | 11.25 | 313.27   | 22    |
| 313.2875 | 11.5  | 313.3038 | 19.25 |
| 313.3213 | 10    | 313.3338 | 17.75 |
| 313.3538 | 12.25 | 313.365  | 19.25 |

|          |       |
|----------|-------|
| 313.3875 | 12.25 |
| 313.4225 | 10.5  |
| 313.455  | 13.5  |
| 313.4888 | 14    |
| 313.5213 | 11.75 |
| 313.5538 | 11.75 |
| 313.5875 | 13.75 |
| 313.6213 | 12.75 |
| 313.6563 | 12.25 |
| 313.6913 | 13.25 |
| 313.7225 | 10.75 |
| 313.7575 | 11.5  |
| 313.7875 | 9.75  |
| 313.8213 | 11.75 |
| 313.8538 | 12.25 |
| 313.8875 | 8.5   |
| 313.9225 | 10.25 |
| 313.955  | 10    |
| 313.9888 | 10.5  |
| 314.0213 | 11.25 |
| 314.0538 | 11.75 |
| 314.0875 | 10.5  |
| 314.1213 | 11    |
| 314.1563 | 11.25 |
| 314.19   | 10.25 |
| 314.2225 | 9.5   |
| 314.2575 | 12    |
| 314.2875 | 10.25 |
| 314.3213 | 12    |
| 314.3538 | 13    |
| 314.3875 | 12.5  |
| 314.4225 | 16    |
| 314.4575 | 17.25 |
| 314.4888 | 14.5  |
| 314.5225 | 12.75 |
| 314.5513 | 17.75 |
| 314.5875 | 15.75 |
| 314.6213 | 13.25 |
| 314.6575 | 15    |
| 314.6913 | 12.5  |
| 314.7263 | 10.75 |
| 314.7588 | 14.5  |
| 314.7888 | 10.25 |
| 314.8238 | 12.25 |
| 314.8588 | 13    |
| 314.89   | 14.75 |
| 314.925  | 10.5  |
| 314.9575 | 13.75 |
| 314.9913 | 10.75 |
| 315.0238 | 13.75 |

|          |       |
|----------|-------|
| 313.4063 | 18    |
| 313.4388 | 19.25 |
| 313.4713 | 20.25 |
| 313.5013 | 19    |
| 313.5363 | 24    |
| 313.5675 | 22.25 |
| 313.6025 | 18    |
| 313.635  | 16.75 |
| 313.6725 | 19.75 |
| 313.7075 | 17.25 |
| 313.7388 | 17    |
| 313.77   | 23.5  |
| 313.8038 | 18.5  |
| 313.8338 | 23.25 |
| 313.865  | 18    |
| 313.9063 | 18    |
| 313.9388 | 21.5  |
| 313.9713 | 16    |
| 314.0013 | 20.25 |
| 314.0363 | 18.5  |
| 314.0675 | 16.5  |
| 314.1025 | 17.25 |
| 314.135  | 16.75 |
| 314.1725 | 18    |
| 314.2088 | 16.5  |
| 314.2388 | 20    |
| 314.27   | 18.25 |
| 314.3038 | 20.5  |
| 314.3338 | 19.75 |
| 314.365  | 17.5  |
| 314.4063 | 16.25 |
| 314.4388 | 19.5  |
| 314.4713 | 19    |
| 314.5013 | 19.75 |
| 314.5363 | 20.25 |
| 314.5675 | 19.75 |
| 314.6025 | 16.5  |
| 314.635  | 19.75 |
| 314.6725 | 18.75 |
| 314.7088 | 17.5  |
| 314.7388 | 19    |
| 314.77   | 21.25 |
| 314.8038 | 18.75 |
| 314.835  | 22.75 |
| 314.865  | 16.5  |
| 314.9038 | 18.75 |
| 314.9388 | 18.5  |
| 314.9713 | 20    |
| 315.0013 | 27    |
| 315.0363 | 20.75 |

|          |       |          |       |
|----------|-------|----------|-------|
| 315.0538 | 12.75 | 315.0675 | 21.25 |
| 315.0888 | 12.5  | 315.1025 | 23    |
| 315.1225 | 9     | 315.1338 | 20.25 |
| 315.1575 | 12.25 | 315.1725 | 18.75 |
| 315.1925 | 14.75 | 315.2075 | 19.25 |
| 315.2263 | 12.5  | 315.2388 | 21.25 |
| 315.2588 | 14    | 315.27   | 21    |
| 315.2888 | 15    | 315.3038 | 17.75 |
| 315.3238 | 12.75 | 315.335  | 18    |
| 315.3588 | 12    | 315.365  | 18.25 |
| 315.39   | 11.75 | 315.4038 | 15    |
| 315.425  | 12.5  | 315.4388 | 19.75 |
| 315.46   | 12.75 | 315.4713 | 22    |
| 315.4913 | 11    | 315.5013 | 20    |
| 315.5238 | 9     | 315.5363 | 28    |
| 315.5538 | 12.75 | 315.5675 | 32.5  |
| 315.5888 | 9.5   | 315.6025 | 32    |
| 315.6225 | 11    | 315.6338 | 33    |
| 315.66   | 13.75 | 315.6725 | 36.5  |
| 315.6913 | 11    | 315.7075 | 23    |
| 315.7263 | 13    | 315.7388 | 22    |
| 315.7588 | 16    | 315.77   | 24.25 |
| 315.7888 | 8     | 315.8038 | 19.25 |
| 315.8238 | 11    | 315.835  | 23.5  |
| 315.8588 | 14.25 | 315.865  | 22.75 |
| 315.89   | 13    | 315.9013 | 38    |
| 315.925  | 15.75 | 315.9388 | 39    |
| 315.96   | 10.75 | 315.9713 | 42    |
| 315.9913 | 10.75 | 316.0013 | 21.75 |
| 316.0238 | 10.25 | 316.0363 | 24.75 |
| 316.0538 | 13.5  | 316.0675 | 23    |
| 316.0888 | 11.5  | 316.1025 | 23.5  |
| 316.1225 | 10.5  | 316.1338 | 20    |
| 316.16   | 7.5   | 316.1738 | 23    |
| 316.1913 | 9.75  | 316.2075 | 28.75 |
| 316.2263 | 10    | 316.2388 | 27    |
| 316.2588 | 11    | 316.27   | 21.5  |
| 316.2888 | 11.75 | 316.3038 | 20.25 |
| 316.3238 | 13.75 | 316.335  | 21.25 |
| 316.3588 | 12    | 316.365  | 18    |
| 316.39   | 14.25 | 316.4013 | 21    |
| 316.4275 | 13.25 | 316.4388 | 21.75 |
| 316.46   | 12.25 | 316.4713 | 29    |
| 316.4913 | 12.25 | 316.5013 | 27    |
| 316.5238 | 11.5  | 316.5363 | 24.5  |
| 316.5538 | 12.25 |          |       |
| 316.5913 | 11.5  |          |       |
| 316.6225 | 11.5  |          |       |
| 316.66   | 17.75 |          |       |
| 316.6913 | 13.5  | 316.7075 | 50    |

|          |       |
|----------|-------|
| 316.7263 | 9     |
| 316.7588 | 14.25 |
| 316.7888 | 11.25 |
| 316.8238 | 11    |
| 316.8588 | 15    |
| 316.89   | 15.25 |
| 316.9275 | 18    |
| 316.96   | 17.25 |
| 316.9913 | 14    |
| 317.0238 | 15    |
| 317.0538 | 13.75 |
| 317.0913 | 12.75 |
| 317.1225 | 13    |
| 317.1575 | 10.5  |
| 317.1913 | 10    |
| 317.2263 | 12.25 |
| 317.2588 | 14.25 |
| 317.2888 | 12    |
| 317.3238 | 13.25 |
| 317.3588 | 16.5  |
| 317.39   | 13.75 |
| 317.4275 | 12.5  |
| 317.46   | 16.5  |
| 317.4913 | 11.75 |
| 317.5238 | 12    |
| 317.5538 | 11.5  |
| 317.5913 | 13    |
| 317.6225 | 14.5  |
| 317.6575 | 14.5  |
| 317.6913 | 15.5  |
| 317.7263 | 12.5  |
| 317.7588 | 10.25 |
| 317.7888 | 11.5  |
| 317.8238 | 12.75 |
| 317.8588 | 12.75 |
| 317.89   | 12.5  |
| 317.9275 | 11.75 |
| 317.96   | 14.25 |
| 317.9913 | 10.25 |
| 318.0238 | 15.75 |
| 318.0538 | 15.25 |
| 318.0913 | 13.25 |
| 318.1225 | 13.5  |
| 318.1575 | 16.5  |
| 318.1938 | 10.75 |
| 318.2263 | 12.5  |
| 318.2588 | 16.5  |
| 318.2888 | 12.75 |
| 318.3263 | 13.5  |
| 318.3588 | 15    |

|          |       |
|----------|-------|
| 316.7388 | 22.75 |
| 316.77   | 39    |
| 316.8038 | 36.5  |
| 316.835  | 33    |
| 316.865  | 26.75 |
| 316.9013 | 23.75 |
| 316.9388 | 26.5  |
| 316.9713 | 52.5  |
|          |       |
| 317.2075 | 37.5  |
| 317.2388 | 40.5  |
| 317.27   | 54.25 |
| 317.3038 | 21.25 |
| 317.335  | 43.25 |
| 317.365  | 46    |
| 317.4013 | 21.5  |
| 317.4388 | 26.75 |
| 317.4713 | 23.75 |
| 317.5013 | 27.25 |
| 317.5363 | 23.25 |
| 317.5675 | 20    |
| 317.6025 | 41    |
|          |       |
| 317.7075 | 47.25 |
| 317.7388 | 23.75 |
| 317.77   | 30.75 |
| 317.8038 | 45    |
| 317.835  | 34.75 |
| 317.865  | 19.75 |
| 317.9013 | 24    |
| 317.9388 | 35.5  |
| 317.9713 | 47    |
|          |       |
| 318.0363 | 55.25 |
| 318.0675 | 27.75 |
| 318.1025 | 23.75 |
| 318.135  | 40.75 |
| 318.1713 | 26    |
| 318.2075 | 25.75 |
| 318.2388 | 29.75 |
| 318.27   | 39.5  |
|          |       |
| 318.365  | 23.75 |

|          |       |          |       |
|----------|-------|----------|-------|
| 318.3913 | 13.5  | 318.3988 | 29.5  |
| 318.4275 | 14.75 | 318.4388 | 19.75 |
| 318.46   | 15    | 318.4713 | 26.75 |
| 318.4913 | 13.5  | 318.5013 | 21.25 |
| 318.5238 | 15.5  | 318.5363 | 26.25 |
| 318.5538 | 13    | 318.5675 | 23.75 |
| 318.5913 | 13.25 | 318.6025 | 22.25 |
| 318.6225 | 10.75 | 318.635  | 23.75 |
| 318.6575 | 11.75 | 318.67   | 47.25 |
| 318.6938 | 16.25 | 318.7075 | 53.5  |
| 318.7263 | 12.75 | 318.7388 | 20.25 |
| 318.7588 | 9     | 318.77   | 55    |
| 318.7888 | 13.25 | 318.8038 | 37    |
| 318.8238 | 13.25 | 318.835  | 19.25 |
| 318.8588 | 16.25 | 318.865  | 39.5  |
| 318.8913 | 13.75 |          |       |
| 318.9275 | 13.25 |          |       |
| 318.96   | 11.75 | 318.9713 | 48.25 |
| 318.9913 | 13.5  | 319.0013 | 39.5  |
| 319.0238 | 12.75 | 319.0363 | 22.5  |
| 319.0538 | 12.5  | 319.0675 | 23.75 |
| 319.0913 | 15.25 | 319.1025 | 29.25 |
| 319.125  | 15.5  | 319.135  | 39    |
| 319.1588 | 11    | 319.17   | 35.75 |
| 319.1938 | 14    | 319.2075 | 27.25 |
| 319.2263 | 10    | 319.2388 | 49    |
| 319.2588 | 14.25 | 319.27   | 39.5  |
| 319.2888 | 12.5  | 319.3038 | 27.75 |
| 319.3263 | 8.75  | 319.335  | 24.5  |
| 319.3588 | 11.25 | 319.365  | 38    |
| 319.3913 | 13.25 | 319.4038 | 43.25 |
| 319.4275 | 10    | 319.4388 | 22.75 |
| 319.46   | 13.25 | 319.4713 | 43.5  |
| 319.4913 | 10.5  | 319.5013 | 38.75 |
| 319.5238 | 10.5  | 319.535  | 21.75 |
| 319.5538 | 12.5  | 319.57   | 21.25 |
| 319.5913 | 11    | 319.6025 | 38.25 |
| 319.6225 | 14.25 | 319.635  | 26.75 |
| 319.6588 | 12.5  | 319.67   | 24    |
| 319.6938 | 14    | 319.7075 | 22    |
| 319.7263 | 15    | 319.7388 | 21    |
| 319.7588 | 13.75 | 319.77   | 21.5  |
| 319.7888 | 14.75 | 319.8038 | 17.25 |
| 319.825  | 13    | 319.8363 | 19.75 |
| 319.8588 | 13    | 319.8675 | 17    |
| 319.8913 | 12.5  | 319.9038 | 19.5  |
| 319.9275 | 17.25 | 319.9413 | 17.25 |
| 319.96   | 17.25 | 319.9738 | 17    |
| 319.9913 | 10.75 | 320.0038 | 17.75 |
| 320.0238 | 15    | 320.0388 | 18.75 |



|          |       |
|----------|-------|
| 320.0538 | 10    |
| 320.0913 | 15    |
| 320.1225 | 13.75 |
| 320.1588 | 16.75 |
| 320.1938 | 13.5  |
| 320.2263 | 11.75 |
| 320.2588 | 13.25 |
| 320.2888 | 15    |
| 320.325  | 13.75 |
| 320.3588 | 10    |
| 320.3925 | 11    |
| 320.4275 | 13.5  |
| 320.46   | 10.75 |
| 320.4913 | 13.75 |
| 320.5238 | 11.5  |
| 320.5538 | 14.75 |
| 320.5913 | 9.75  |
| 320.625  | 14.75 |
| 320.6588 | 11.5  |
| 320.6938 | 9.75  |
| 320.7263 | 14.25 |
| 320.7588 | 11.5  |
| 320.7888 | 11.5  |
| 320.825  | 12.25 |
| 320.8588 | 10.5  |
| 320.8913 | 13.25 |
| 320.9275 | 11.25 |
| 320.96   | 10.75 |
| 320.9913 | 12.5  |
| 321.0238 | 12.5  |
| 321.0563 | 9     |
| 321.0913 | 12.5  |
| 321.125  | 13.5  |
| 321.1588 | 10.5  |
| 321.1938 | 11    |
| 321.2263 | 9     |
| 321.2588 | 11.25 |
| 321.2888 | 10.5  |
| 321.325  | 9.75  |
| 321.3588 | 12    |
| 321.3938 | 12.25 |
| 321.4275 | 12.25 |
| 321.46   | 12.25 |
| 321.4913 | 13    |
| 321.5238 | 11.5  |
| 321.5563 | 11.5  |
| 321.5913 | 11.75 |
| 321.625  | 11.5  |
| 321.6588 | 10    |
| 321.6938 | 13.75 |

|          |       |
|----------|-------|
| 320.0725 | 20    |
| 320.105  | 26.5  |
| 320.1363 | 21    |
| 320.1713 | 19.5  |
| 320.2088 | 18    |
| 320.24   | 15.5  |
| 320.2725 | 22    |
| 320.305  | 21.5  |
| 320.3363 | 22.5  |
| 320.3675 | 18.25 |
| 320.4038 | 22.25 |
| 320.4413 | 17.25 |
| 320.4738 | 21.25 |
| 320.5038 | 16    |
| 320.5388 | 20.25 |
| 320.5725 | 17.75 |
| 320.605  | 19.75 |
| 320.6363 | 16    |
| 320.6713 | 17.5  |
| 320.7088 | 17.5  |
| 320.74   | 18.5  |
| 320.7725 | 20.75 |
| 320.805  | 18.75 |
| 320.8363 | 21    |
| 320.8675 | 19.25 |
| 320.9038 | 20.5  |
| 320.9388 | 20    |
| 320.9738 | 20.25 |
| 321.0038 | 23.5  |
| 321.0388 | 22.75 |
| 321.0725 | 19.75 |
| 321.105  | 21.75 |
| 321.1363 | 23.25 |
| 321.1713 | 24.25 |
| 321.2088 | 25    |
| 321.24   | 23.75 |
| 321.2725 | 19    |
| 321.305  | 19    |
| 321.3363 | 22    |
| 321.3675 | 20.25 |
| 321.4038 | 21.75 |
| 321.4375 | 19.5  |
| 321.4738 | 21.25 |
| 321.5038 | 24.5  |
| 321.5388 | 21.75 |
| 321.5725 | 22.75 |
| 321.605  | 20.25 |
| 321.6363 | 18.5  |
| 321.6713 | 20.75 |
| 321.71   | 16.75 |

|          |       |          |       |
|----------|-------|----------|-------|
| 321.7263 | 11.5  | 321.74   | 18.25 |
| 321.7588 | 9.75  | 321.7725 | 20    |
| 321.7888 | 8.75  | 321.805  | 22    |
| 321.825  | 13.5  | 321.8363 | 17    |
| 321.8588 | 9.25  | 321.8675 | 19.75 |
| 321.8938 | 9.25  | 321.9038 | 19    |
| 321.9288 | 14    | 321.9388 | 18    |
| 321.96   | 11.25 | 321.9738 | 15.25 |
| 321.9913 | 11.25 | 322.0038 | 15.5  |
| 322.0238 | 12.25 | 322.0388 | 20    |
| 322.0563 | 13.25 | 322.0725 | 25    |
| 322.0913 | 12    | 322.105  | 22.5  |
| 322.125  | 10    | 322.1363 | 16.25 |
| 322.1588 | 10.25 | 322.1713 | 19.25 |
| 322.1938 | 10    | 322.2088 | 15    |
| 322.2263 | 11.75 | 322.24   | 21.5  |
| 322.2588 | 11.25 | 322.2725 | 18    |
| 322.2888 | 10.25 | 322.305  | 12.5  |
| 322.325  | 9.5   | 322.3363 | 14.75 |
| 322.36   | 10.75 | 322.3675 | 15    |
| 322.3938 | 10.75 | 322.4038 | 19.25 |
| 322.4275 | 12    | 322.4375 | 20.25 |
| 322.4613 | 8.5   | 322.4738 | 16    |
| 322.4925 | 9.25  | 322.505  | 18.25 |
| 322.525  | 10.75 | 322.5388 | 18.75 |
| 322.5588 | 11.5  | 322.575  | 16.5  |
| 322.5938 | 13    | 322.6075 | 19.75 |
| 322.6275 | 8.5   | 322.6413 | 18.5  |
| 322.6625 | 11.5  | 322.6738 | 15.75 |
| 322.6963 | 11.75 | 322.7088 | 16.75 |
| 322.7288 | 11.5  | 322.7438 | 17.5  |
| 322.7613 | 11.75 | 322.775  | 15.75 |
| 322.7913 | 11.5  | 322.8063 | 18.75 |
| 322.8263 | 10.25 | 322.8375 | 16.25 |
| 322.8613 | 9.5   | 322.8688 | 17    |
| 322.895  | 11    | 322.905  | 18.25 |
| 322.9313 | 12.25 | 322.9388 | 15    |
| 322.9613 | 10.25 | 322.975  | 19    |
| 322.9925 | 11.75 | 323.0075 | 20.25 |
| 323.025  | 10    | 323.0413 | 16.75 |
| 323.0588 | 10.75 | 323.0775 | 19.75 |
| 323.0938 | 10.25 | 323.1088 | 16.75 |
| 323.1275 | 10.5  | 323.1425 | 19    |
| 323.1625 | 14.5  | 323.1763 | 19.5  |
| 323.1975 | 10.75 | 323.2113 | 17.5  |
| 323.2288 | 9.75  | 323.2438 | 16.25 |
| 323.2613 | 13.5  | 323.2763 | 22    |
| 323.2913 | 12.5  | 323.3075 | 17.5  |
| 323.3263 | 15.5  | 323.34   | 20    |
| 323.3613 | 17.25 | 323.3738 | 21.25 |

|          |       |          |       |
|----------|-------|----------|-------|
| 323.395  | 12.5  | 323.4088 | 17.5  |
| 323.43   | 13.75 | 323.44   | 15    |
| 323.4613 | 11.75 | 323.4775 | 18.25 |
| 323.4925 | 11.25 | 323.5075 | 19.25 |
| 323.525  | 14.25 | 323.5413 | 12.5  |
| 323.5588 | 11.75 | 323.5788 | 19.25 |
| 323.5938 | 8.5   | 323.6088 | 18    |
| 323.6288 | 9     | 323.645  | 19.75 |
| 323.6625 | 12    | 323.6788 | 15.25 |
| 323.6963 | 8.5   | 323.7113 | 19    |
| 323.7288 | 10.5  | 323.7438 | 17.75 |
| 323.7613 | 8.75  | 323.7763 | 15.5  |
| 323.7913 | 13.75 | 323.8088 | 17.25 |
| 323.8263 | 12.75 | 323.84   | 14    |
| 323.8613 | 13.25 | 323.8738 | 13    |
| 323.895  | 9.5   | 323.9088 | 15.25 |
| 323.93   | 9.5   | 323.94   | 11.75 |
| 323.9613 | 10.5  | 323.9763 | 15.5  |
| 323.9925 | 12.25 | 324.0075 | 16    |
| 324.025  | 13    | 324.0413 | 15    |
| 324.0588 | 13.25 | 324.0775 | 15.25 |
| 324.0963 | 12.25 | 324.1088 | 16.5  |
| 324.1288 | 13.25 | 324.145  | 19.5  |
| 324.1625 | 10.5  | 324.1763 | 17.25 |
| 324.1963 | 11    | 324.2113 | 15    |
| 324.2288 | 13.75 | 324.2438 | 19    |
| 324.2613 | 11    | 324.2763 | 18.25 |
| 324.2913 | 9.75  | 324.3088 | 19    |
| 324.325  | 11    | 324.34   | 21    |
| 324.3613 | 12    | 324.3738 | 20    |
| 324.3963 | 10.5  | 324.4088 | 19.25 |
| 324.43   | 15.5  | 324.44   | 15.75 |
| 324.4613 | 15    | 324.4763 | 17.75 |
| 324.4925 | 13.5  | 324.5075 | 18.5  |
| 324.525  | 12    | 324.5413 | 15.75 |
| 324.5588 | 13.25 | 324.5775 | 15    |
| 324.5963 | 10.5  | 324.6088 | 18.25 |
| 324.6288 | 13    | 324.645  | 12.5  |
| 324.6625 | 13    | 324.6763 | 16    |
| 324.6963 | 11.5  | 324.7113 | 20.75 |
| 324.7288 | 11    | 324.7438 | 12.5  |
| 324.7613 | 11.5  | 324.7763 | 16.75 |
| 324.7913 | 12.5  | 324.8075 | 17.25 |
| 324.825  | 11.75 | 324.84   | 13.75 |
| 324.8613 | 11    | 324.8738 | 13.25 |
| 324.8975 | 13.75 | 324.9088 | 15.25 |
| 324.93   | 9.5   | 324.9413 | 14    |
| 324.9613 | 12.5  | 324.9763 | 13.5  |
| 324.995  | 10.25 | 325.0075 | 15.5  |
| 325.025  | 12.5  | 325.0413 | 16.25 |

|          |       |          |       |
|----------|-------|----------|-------|
| 325.0588 | 13.5  | 325.0775 | 16.75 |
| 325.0963 | 10.25 | 325.1088 | 18.25 |
| 325.1288 | 10.25 | 325.145  | 18    |
| 325.1625 | 11.75 | 325.1763 | 17    |
| 325.1963 | 11.5  | 325.2113 | 18    |
| 325.2288 | 10.5  | 325.2438 | 14.75 |
| 325.2613 | 10.75 | 325.2763 | 12.5  |
| 325.2913 | 10.25 | 325.3075 | 12.75 |
| 325.325  | 8.5   | 325.34   | 9.75  |
| 325.3638 | 8.75  | 325.3738 | 10.5  |
| 325.3975 | 12.75 | 325.4088 | 14    |
| 325.43   | 8.75  | 325.44   | 12    |
| 325.4613 | 13.25 | 325.4763 | 10.75 |
| 325.4925 | 8.75  | 325.5075 | 12.25 |
| 325.525  | 10.75 | 325.5413 | 13.75 |
| 325.5613 | 12    | 325.5775 | 9.25  |
| 325.5963 | 12.75 | 325.61   | 13.5  |
| 325.6288 | 15.75 | 325.645  | 13.25 |
| 325.6625 | 11.25 | 325.6763 | 14.75 |
| 325.6938 | 13    | 325.7113 | 13.25 |
| 325.7288 | 12    | 325.7413 | 14    |
| 325.7613 | 7.75  | 325.7763 | 15.5  |
| 325.7913 | 10.75 | 325.8075 | 11    |
| 325.825  | 8.25  | 325.84   | 12.25 |
| 325.8638 | 11.5  | 325.8738 | 14    |
| 325.8975 | 8.75  | 325.9088 | 15    |
| 325.93   | 8     | 325.9413 | 14.25 |
| 325.9613 | 8     | 325.9763 | 10.75 |
| 325.9925 | 8.75  | 326.0075 | 15.75 |
| 326.025  | 6     | 326.0413 | 12.75 |
| 326.0613 | 8.75  | 326.075  | 18    |
| 326.0963 | 7.75  | 326.1088 | 18.5  |
| 326.1288 | 10.5  | 326.145  | 14.5  |
| 326.1625 | 8.25  | 326.1763 | 18.25 |
| 326.1938 | 7.5   | 326.2113 | 15    |
| 326.2288 | 8     | 326.2413 | 16.75 |
| 326.2613 | 12    | 326.2763 | 16.25 |
| 326.2913 | 11.5  | 326.3075 | 15    |
| 326.3275 | 10.75 | 326.34   | 17.75 |
| 326.3638 | 10.25 | 326.375  | 17.5  |
| 326.3975 | 10    | 326.4088 | 15.25 |
| 326.43   | 13.75 | 326.4413 | 13.75 |
| 326.4613 | 11.75 | 326.4763 | 14.75 |
| 326.4925 | 12    | 326.5075 | 17.25 |
| 326.525  | 17.25 | 326.5413 | 15    |
| 326.5613 | 16    | 326.575  | 15.25 |
| 326.5988 | 10.75 | 326.6088 | 16.5  |
| 326.6288 | 12.25 | 326.645  | 16.75 |
| 326.6625 | 15    | 326.6763 | 14    |
| 326.6938 | 9.25  | 326.7113 | 18.25 |

|          |       |          |       |
|----------|-------|----------|-------|
| 326.7288 | 11    | 326.7413 | 18.5  |
| 326.7613 | 10.5  | 326.7763 | 17.75 |
| 326.7925 | 10.25 | 326.8075 | 20.5  |
| 326.8275 | 6.5   | 326.84   | 17.5  |
| 326.8638 | 10.5  | 326.875  | 18    |
| 326.8975 | 16.75 | 326.9088 | 17.75 |
| 326.93   | 11    | 326.9413 | 14.75 |
| 326.9613 | 10.5  | 326.9763 | 13.75 |
| 326.9925 | 12    | 327.0063 | 15.75 |
| 327.025  | 9.25  | 327.0438 | 16.75 |
| 327.0613 | 12    | 327.075  | 20    |
| 327.0988 | 13.5  | 327.1088 | 17.25 |
| 327.1288 | 11    | 327.1475 | 19.5  |
| 327.1625 | 10.75 | 327.1763 | 19.25 |
| 327.1938 | 13.75 | 327.2113 | 16.25 |
| 327.2288 | 13.75 | 327.2413 | 18    |
| 327.2625 | 11.75 | 327.2763 | 16.25 |
| 327.2925 | 10.75 | 327.31   | 13.5  |
| 327.3275 | 9.5   | 327.34   | 18.75 |
| 327.3638 | 12.75 | 327.375  | 19    |
| 327.3975 | 10    | 327.4088 | 17.5  |
| 327.43   | 10.5  | 327.4413 | 16.75 |
| 327.4613 | 11    | 327.4763 | 16    |
| 327.4925 | 8.25  | 327.5063 | 16.25 |
| 327.525  | 10    | 327.5438 | 14.25 |
| 327.5613 | 10.5  | 327.575  | 18.75 |
| 327.5988 | 10.5  | 327.6088 | 14.25 |
| 327.63   | 12.75 | 327.645  | 19.75 |
| 327.6625 | 11.75 | 327.6763 | 18.5  |
| 327.6938 | 12.75 | 327.7113 | 18.5  |
| 327.7288 | 11    | 327.7413 | 16.75 |
| 327.7613 | 11.5  | 327.7763 | 21    |
| 327.7925 | 10    | 327.8075 | 17.5  |
| 327.8275 | 10    | 327.8388 | 17.25 |
| 327.8638 | 13.75 | 327.875  | 14.5  |
| 327.8975 | 11.75 | 327.9113 | 17.75 |
| 327.93   | 11.25 | 327.9425 | 19    |
| 327.9613 | 12.5  | 327.9763 | 15.5  |
| 327.9925 | 9.75  | 328.0063 | 15.25 |
| 328.025  | 10.5  | 328.0438 | 16.75 |
| 328.0613 | 13.25 | 328.075  | 14    |
| 328.0963 | 12.5  | 328.1088 | 17    |
| 328.13   | 12    | 328.145  | 16    |
| 328.1625 | 11    | 328.1763 | 18.5  |
| 328.1938 | 11.75 | 328.2113 | 13.25 |
| 328.2288 | 10    | 328.2413 | 18    |
| 328.2613 | 10.75 | 328.2763 | 16.5  |
| 328.2925 | 9.25  | 328.3075 | 15.75 |
| 328.3288 | 8.5   | 328.3388 | 14    |
| 328.3638 | 8.25  | 328.375  | 16    |

|          |       |
|----------|-------|
| 328.3975 | 10    |
| 328.43   | 12.5  |
| 328.46   | 9.5   |
| 328.4925 | 9.75  |
| 328.525  | 12    |
| 328.5625 | 8.75  |
| 328.5963 | 11.75 |
| 328.63   | 9.5   |
| 328.6625 | 9.75  |
| 328.6938 | 10.25 |
| 328.7288 | 13.75 |
| 328.7613 | 13    |
| 328.7925 | 12    |
| 328.8288 | 10.75 |
| 328.8638 | 9.75  |
| 328.8975 | 9.25  |
| 328.93   | 11    |
| 328.96   | 12    |
| 328.9925 | 10    |
| 329.025  | 12.25 |
| 329.0625 | 10.5  |
| 329.0963 | 13    |
| 329.13   | 10    |
| 329.1625 | 9.75  |
| 329.195  | 11.75 |
| 329.2288 | 10    |
| 329.2613 | 14    |
| 329.2925 | 10    |
| 329.3288 | 9.25  |
| 329.3663 | 11.25 |
| 329.3975 | 9     |
| 329.43   | 11.5  |
| 329.46   | 14    |
| 329.4938 | 10.25 |
| 329.525  | 12.5  |
| 329.565  | 9     |
| 329.5963 | 12    |
| 329.63   | 9.75  |
| 329.6625 | 8.75  |
| 329.6938 | 11    |
| 329.7288 | 8.5   |
| 329.7613 | 11    |
| 329.7938 | 10.5  |
| 329.8288 | 9.75  |
| 329.8663 | 8.5   |
| 329.8975 | 10.5  |
| 329.93   | 10.75 |
| 329.96   | 11    |
| 329.9925 | 10.5  |
| 330.025  | 13    |

|          |       |
|----------|-------|
| 328.4088 | 19    |
| 328.4413 | 14.75 |
| 328.4763 | 19    |
| 328.5063 | 14.25 |
| 328.5438 | 11.25 |
| 328.575  | 19    |
| 328.6113 | 18.75 |
| 328.6438 | 13.5  |
| 328.6763 | 16.75 |
| 328.7113 | 14.5  |
| 328.7413 | 15.25 |
| 328.7738 | 13.25 |
| 328.8075 | 13.5  |
| 328.8388 | 16    |
| 328.875  | 14.75 |
| 328.9088 | 17.25 |
| 328.9413 | 17.5  |
| 328.9788 | 17.5  |
| 329.0113 | 15.25 |
| 329.045  | 18.75 |
| 329.0763 | 18    |
| 329.11   | 21.75 |
| 329.1475 | 26.25 |
| 329.1775 | 26.5  |
| 329.2125 | 20.75 |
| 329.2425 | 24.25 |
| 329.2775 | 16.5  |
| 329.31   | 16.75 |
| 329.3413 | 16.75 |
| 329.3775 | 16    |
| 329.4113 | 26.25 |
| 329.4463 | 28.25 |
| 329.4788 | 23.5  |
| 329.5088 | 18.25 |
| 329.545  | 32.5  |
| 329.5763 | 13.25 |
| 329.61   | 23    |
| 329.7125 | 32    |
| 329.7425 | 21.5  |
| 329.7775 | 54.5  |
| 329.81   | 33.25 |
| 329.8413 | 32.75 |
| 329.8775 | 31.25 |
| 329.9113 | 34.25 |
| 329.9463 | 29.5  |
| 329.9788 | 22.5  |
| 330.0088 | 27.75 |
| 330.045  | 27.5  |

|          |       |          |       |
|----------|-------|----------|-------|
| 330.065  | 15.25 | 330.0763 | 21.5  |
| 330.0963 | 10    | 330.11   | 35.25 |
| 330.13   | 14    | 330.1475 | 53.25 |
| 330.1625 | 10.25 | 330.18   | 39.25 |
| 330.1938 | 10.25 | 330.2125 | 17.5  |
| 330.2288 | 10    | 330.2425 | 22    |
| 330.2613 | 11.75 | 330.2775 | 29    |
| 330.2925 | 11.5  | 330.31   | 12.5  |
| 330.3288 | 12.5  | 330.3425 | 23.5  |
| 330.3663 | 8.5   | 330.3775 | 19.5  |
| 330.3975 | 11.25 | 330.4113 | 36    |
| 330.43   | 11    | 330.4463 | 33.5  |
| 330.46   | 13    | 330.4788 | 46.75 |
| 330.4925 | 8.75  | 330.5088 | 53    |
| 330.525  | 8.5   | 330.5438 | 19    |
| 330.565  | 9.75  | 330.5763 | 36.25 |
| 330.5963 | 10.75 | 330.61   | 46.75 |
| 330.63   | 9.25  | 330.6475 | 22    |
| 330.6625 | 11.5  | 330.68   | 15.75 |
| 330.6938 | 11.5  | 330.7125 | 22.75 |
| 330.7288 | 11.5  | 330.7425 | 19.5  |
| 330.7613 | 8.75  | 330.7775 | 18    |
| 330.7925 | 13    | 330.81   | 19.25 |
| 330.8288 | 9     | 330.8425 | 15.75 |
| 330.8663 | 9.5   | 330.875  | 19.25 |
| 330.8975 | 8.75  | 330.9113 | 19    |
| 330.93   | 11.5  | 330.9463 | 16.75 |
| 330.96   | 9.5   | 330.9788 | 16.25 |
| 330.9925 | 11.5  | 331.0088 | 19    |
| 331.025  | 12.5  | 331.0438 | 12.5  |
| 331.065  | 12.25 | 331.0763 | 16.25 |
| 331.0963 | 10.75 | 331.11   | 14.75 |
| 331.13   | 14    | 331.145  | 15.5  |
| 331.1625 | 13    | 331.18   | 16.5  |
| 331.1938 | 12.25 | 331.2125 | 15    |
| 331.2288 | 13    | 331.2425 | 24    |
| 331.2613 | 11    | 331.2775 | 16    |
| 331.2963 | 13    | 331.31   | 14.5  |
| 331.3288 | 10.5  | 331.3425 | 18.75 |
| 331.3663 | 10.25 | 331.375  | 19    |
| 331.3975 | 11.75 | 331.4138 | 18.75 |
| 331.43   | 14    | 331.4463 | 22.5  |
| 331.46   | 8.5   | 331.4788 | 20.75 |
| 331.4925 | 10.5  | 331.5113 | 20    |
| 331.525  | 12.75 | 331.5438 | 18.5  |
| 331.565  | 12.25 | 331.5788 | 16.75 |
| 331.5975 | 11.75 | 331.61   | 20.25 |
| 331.63   | 10    | 331.645  | 18.75 |
| 331.6625 | 9.25  | 331.68   | 21    |
| 331.6938 | 11.5  | 331.7125 | 25.25 |

|          |       |          |       |
|----------|-------|----------|-------|
| 331.7263 | 12.75 | 331.7425 | 39.5  |
| 331.7613 | 10.75 | 331.7775 | 45    |
| 331.7963 | 13.5  | 331.81   | 29.75 |
| 331.8288 | 9.75  | 331.8425 | 24.25 |
| 331.8663 | 11    | 331.875  | 25.75 |
| 331.8975 | 12.75 | 331.9138 | 21    |
| 331.93   | 9.25  | 331.9463 | 32    |
| 331.96   | 9.5   | 331.9788 | 30    |
| 331.9925 | 9.5   | 332.0113 | 18.75 |
| 332.025  | 13.75 | 332.0438 | 19.25 |
| 332.065  | 13    | 332.0788 | 21    |
| 332.0975 | 13.25 | 332.11   | 21.75 |
| 332.13   | 8.25  | 332.145  | 15.75 |
| 332.1625 | 14    | 332.18   | 26.5  |
| 332.1938 | 14    | 332.2125 | 32    |
| 332.2263 | 11    | 332.2425 | 32.75 |
| 332.2613 | 13.5  | 332.2775 | 22.25 |
| 332.2963 | 11.5  | 332.31   | 21.5  |
| 332.3288 | 13.5  | 332.3425 | 18    |
| 332.3638 | 12.25 | 332.3725 | 18.75 |
| 332.3975 | 11.5  | 332.4138 | 15    |
| 332.43   | 13    | 332.4463 | 18.25 |
| 332.46   | 6     | 332.4788 | 17.75 |
| 332.4925 | 8.25  | 332.5113 | 15.5  |
| 332.5275 | 9.5   | 332.5438 | 18.75 |
| 332.565  | 7.75  | 332.5788 | 20.75 |
| 332.5975 | 10.25 | 332.61   | 15    |
| 332.63   | 10.75 | 332.6438 | 18.75 |
| 332.6625 | 12.5  | 332.68   | 15.75 |
| 332.6938 | 13.25 | 332.7125 | 16    |
| 332.7263 | 12.75 | 332.7425 | 16.25 |
| 332.7613 | 10.25 | 332.7775 | 18.75 |
| 332.7963 | 11.25 | 332.8075 | 19.25 |
| 332.8288 | 14.75 | 332.8425 | 23    |
| 332.8638 | 10.75 | 332.8725 | 16.75 |
| 332.8975 | 8.5   | 332.9113 | 18.75 |
| 332.93   | 9.5   | 332.9463 | 18    |
| 332.96   | 10.75 | 332.9788 | 17.75 |
| 332.9925 | 12.25 | 333.0113 | 21.5  |
| 333.0275 | 12    | 333.0438 | 21    |
| 333.065  | 11.25 | 333.0788 | 19.25 |
| 333.0975 | 10.5  | 333.11   | 19.5  |
| 333.13   | 10.25 | 333.1438 | 17.75 |
| 333.1625 | 11    | 333.18   | 16.75 |
| 333.1938 | 10.75 | 333.2125 | 19.75 |
| 333.2263 | 7.25  | 333.2425 | 20.25 |
| 333.2613 | 8     | 333.2775 | 15.75 |
| 333.2963 | 9     | 333.31   | 22.5  |
| 333.3313 | 9     | 333.3425 | 20    |
| 333.3638 | 8     | 333.3725 | 24.5  |



|          |       |          |       |
|----------|-------|----------|-------|
| 333.3975 | 10    | 333.4113 | 29.75 |
| 333.43   | 8     | 333.4463 | 19.5  |
| 333.46   | 9     | 333.4788 | 16.75 |
| 333.4925 | 10.5  | 333.5113 | 12.75 |
| 333.53   | 7.75  | 333.5438 | 19    |
| 333.565  | 11    | 333.5788 | 23    |
| 333.5975 | 6.75  | 333.61   | 18.75 |
| 333.63   | 9.25  | 333.6438 | 16    |
| 333.6625 | 11.25 | 333.68   | 14    |
| 333.6938 | 13    | 333.7125 | 21    |
| 333.7263 | 12.5  | 333.7425 | 16    |
| 333.7613 | 11    | 333.7775 | 16    |
| 333.7963 | 11.25 | 333.81   | 19    |
| 333.8313 | 16.75 | 333.8425 | 19.25 |
| 333.8638 | 12.25 | 333.8725 | 17.25 |
| 333.8975 | 11.75 | 333.9113 | 22.25 |
| 333.93   | 16.25 | 333.9463 | 20.5  |
| 333.96   | 14.25 | 333.9788 | 16    |
| 333.9925 | 9     | 334.0113 | 16    |
| 334.0313 | 12.25 | 334.0438 | 17.5  |
| 334.065  | 10.5  | 334.0788 | 13.25 |
| 334.0975 | 12.25 | 334.11   | 15    |
| 334.13   | 13.25 | 334.145  | 15.25 |
| 334.1625 | 13.5  | 334.18   | 15.25 |
| 334.1938 | 9.5   | 334.2125 | 15    |
| 334.2263 | 11    | 334.245  | 15.25 |
| 334.2625 | 9.25  | 334.2775 | 18.75 |
| 334.2963 | 11    | 334.31   | 11.75 |
| 334.3313 | 10.75 | 334.3425 | 15    |
| 334.3638 | 13.25 | 334.3725 | 14.75 |
| 334.3988 | 9.25  | 334.4113 | 15.75 |
| 334.43   | 14.5  | 334.4463 | 18.5  |
| 334.46   | 12.5  | 334.4788 | 15.5  |
| 334.4925 | 11.25 | 334.5113 | 20.75 |
| 334.5313 | 9     | 334.545  | 18.25 |
| 334.565  | 8     | 334.5763 | 14.75 |
| 334.5975 | 11.5  | 334.61   | 16.5  |
| 334.63   | 9     | 334.645  | 14.5  |
| 334.6625 | 10.25 | 334.6788 | 17.5  |
| 334.6938 | 12.25 | 334.7125 | 19.5  |
| 334.7263 | 14.25 | 334.7463 | 17.75 |
| 334.7625 | 13.5  | 334.7775 | 19.25 |
| 334.7963 | 9.25  | 334.81   | 14.25 |
| 334.8313 | 8.5   | 334.8425 | 18.75 |
| 334.8638 | 13.75 | 334.8725 | 13.25 |
| 334.8988 | 12.5  | 334.9113 | 17.75 |
| 334.93   | 10    | 334.9463 | 17    |
| 334.96   | 10.5  | 334.9788 | 17.75 |
| 334.9925 | 9.75  | 335.0113 | 21    |
| 335.0313 | 10.75 | 335.045  | 28.5  |

|          |       |          |       |
|----------|-------|----------|-------|
| 335.0663 | 9.75  | 335.0763 | 15.25 |
| 335.0975 | 11    | 335.11   | 27.25 |
| 335.13   | 12.25 | 335.145  | 24.75 |
| 335.1625 | 12.25 | 335.1788 | 14.5  |
| 335.1938 | 9.5   | 335.2125 | 14    |
| 335.2263 | 13    | 335.245  | 11.75 |
| 335.2625 | 9.5   | 335.2775 | 10.25 |
| 335.2963 | 9     | 335.31   | 14.5  |
| 335.3313 | 8.5   | 335.3425 | 14    |
| 335.3638 | 9.25  | 335.3725 | 13.5  |
| 335.3988 | 9.5   | 335.4088 | 14    |
| 335.43   | 12.75 | 335.4463 | 13    |
| 335.46   | 11    | 335.4788 | 18.25 |
| 335.4925 | 11.75 | 335.5138 | 13.5  |
| 335.5313 | 9.5   | 335.545  | 13.25 |
| 335.5663 | 10.5  | 335.5763 | 12.25 |
| 335.5975 | 11.75 | 335.61   | 17.75 |
| 335.63   | 10    | 335.645  | 16.75 |
| 335.6625 | 6     | 335.6788 | 15.25 |
| 335.6938 | 11.25 | 335.7125 | 16    |
| 335.7263 | 8.75  | 335.745  | 12.5  |
| 335.7625 | 10.25 | 335.78   | 14.75 |
| 335.7975 | 12    | 335.81   | 17.5  |
| 335.8313 | 13    | 335.8425 | 16.5  |
| 335.8638 | 9     | 335.875  | 20    |
| 335.8988 | 10.5  | 335.9088 | 17.75 |
| 335.93   | 11    | 335.9463 | 14.75 |
| 335.96   | 9     | 335.9788 | 15.25 |
| 335.9913 | 12.75 | 336.0138 | 17.75 |
| 336.0313 | 11.25 | 336.045  | 17.25 |
| 336.0663 | 13.25 | 336.0763 | 18.25 |
| 336.0975 | 12    | 336.11   | 14.75 |
| 336.13   | 12.5  | 336.145  | 15.75 |
| 336.1625 | 12.25 | 336.1788 | 18    |
| 336.1938 | 13.75 | 336.2125 | 13.75 |
| 336.2263 | 10.75 | 336.245  | 14.75 |
| 336.2625 | 10    | 336.28   | 17.5  |
| 336.2975 | 10.5  | 336.31   | 17    |
| 336.3313 | 9.25  | 336.3425 | 20.75 |
| 336.3638 | 10.75 | 336.375  | 16.5  |
| 336.3988 | 11.25 | 336.4088 | 13.5  |
| 336.43   | 9.75  | 336.4438 | 16.75 |
| 336.46   | 11    | 336.48   | 11.75 |
| 336.4938 | 10.75 | 336.5113 | 14.75 |
| 336.5313 | 10.25 | 336.545  | 14.5  |
| 336.5663 | 9.5   | 336.5763 | 16.25 |
| 336.5975 | 9.75  | 336.61   | 11.75 |
| 336.63   | 9.25  | 336.6425 | 11.75 |
| 336.6625 | 9.25  | 336.6788 | 16.5  |
| 336.6938 | 9.5   | 336.7125 | 12.25 |

|          |       |          |       |
|----------|-------|----------|-------|
| 336.7263 | 8     | 336.745  | 16.5  |
| 336.7625 | 10    | 336.78   | 16    |
| 336.8    | 14.25 | 336.81   | 16    |
| 336.8313 | 16.75 | 336.8425 | 18.5  |
| 336.8638 | 11.5  | 336.875  | 17    |
| 336.8988 | 12.25 | 336.9088 | 17.5  |
| 336.93   | 15.5  | 336.9438 | 13.5  |
| 336.96   | 13.75 | 336.9788 | 17.25 |
| 336.9938 | 14    | 337.0113 | 16.25 |
| 337.0313 | 10    | 337.045  | 12    |
| 337.0663 | 12.5  | 337.0763 | 18.75 |
| 337.0975 | 12.25 | 337.11   | 15    |
| 337.13   | 11    | 337.1425 | 14.75 |
| 337.1625 | 12    | 337.1788 | 13.75 |
| 337.1938 | 14.5  | 337.215  | 16.75 |
| 337.2263 | 11.5  | 337.245  | 19.25 |
| 337.2625 | 15    | 337.28   | 18    |
| 337.3    | 12.75 | 337.31   | 19.75 |
| 337.3313 | 15.75 | 337.3425 | 14.75 |
| 337.3638 | 12.75 | 337.375  | 15.5  |
| 337.3988 | 15.25 | 337.4088 | 14.5  |
| 337.43   | 11.5  | 337.4438 | 18.75 |
| 337.46   | 14.5  | 337.48   | 16.75 |
| 337.4938 | 10.5  | 337.5125 | 16.75 |
| 337.5313 | 14.25 | 337.545  | 18.25 |
| 337.5663 | 18.25 | 337.5763 | 17.25 |
| 337.5975 | 14    | 337.6113 | 18    |
| 337.63   | 13.25 | 337.6425 | 19.5  |
| 337.6625 | 12.5  | 337.6788 | 14.75 |
| 337.6938 | 11.25 | 337.7125 | 15.25 |
| 337.7263 | 11.5  | 337.745  | 17    |
| 337.7625 | 12    | 337.78   | 16.5  |
| 337.8    | 11.25 | 337.81   | 15.75 |
| 337.8313 | 12    | 337.8425 | 15.5  |
| 337.8638 | 12    | 337.875  | 16    |
| 337.8988 | 14    | 337.9088 | 17.5  |
| 337.93   | 11.25 | 337.9438 | 16.75 |
| 337.96   | 11.25 | 337.98   | 16.5  |
| 337.9938 | 13.25 | 338.0125 | 16.5  |
| 338.0313 | 13.5  | 338.045  | 15.25 |
| 338.0663 | 8.75  | 338.0763 | 15.5  |
| 338.0975 | 10.75 | 338.1125 | 14.75 |
| 338.13   | 10.75 | 338.1463 | 18.75 |
| 338.1625 | 10    | 338.18   | 16.5  |
| 338.1938 | 11    | 338.2138 | 17.5  |
| 338.2288 | 8.75  | 338.2463 | 16    |
| 338.265  | 11.25 | 338.2825 | 13.5  |
| 338.3013 | 10.5  | 338.3125 | 17.25 |
| 338.3313 | 7.5   | 338.3438 | 17    |
| 338.3638 | 9     | 338.3775 | 13.25 |

|          |       |
|----------|-------|
| 338.3988 | 13.5  |
| 338.43   | 11.75 |
| 338.46   | 9.25  |
| 338.4938 | 15    |
| 338.5338 | 15.5  |
| 338.5663 | 11.25 |
| 338.5975 | 11.25 |
| 338.63   | 11    |
| 338.6625 | 13.5  |
| 338.6938 | 11.75 |
| 338.7288 | 13.5  |
| 338.765  | 15.25 |
| 338.8    | 13    |
| 338.8313 | 16.5  |
| 338.8638 | 13.75 |
| 338.8988 | 15.25 |
| 338.93   | 11.75 |
| 338.96   | 11.5  |
| 338.9938 | 13.75 |
| 339.0338 | 12.75 |
| 339.0663 | 11.75 |
| 339.0975 | 12.25 |
| 339.1325 | 13.5  |
| 339.1625 | 13.25 |
| 339.1938 | 10.5  |
| 339.2288 | 12    |
| 339.265  | 12.25 |
| 339.3    | 12.5  |
| 339.3313 | 11    |
| 339.3663 | 13.25 |
| 339.3988 | 11.5  |
| 339.43   | 14.25 |
| 339.46   | 18.25 |
| 339.4938 | 15.5  |
| 339.5338 | 14.25 |
| 339.5663 | 11    |
| 339.5975 | 10.5  |
| 339.6325 | 13.75 |
| 339.6625 | 11.5  |
| 339.6938 | 8.75  |
| 339.7288 | 12.5  |
| 339.765  | 9.5   |
| 339.8    | 11.25 |
| 339.8313 | 9.5   |
| 339.8663 | 13    |
| 339.8988 | 12.5  |
| 339.93   | 10.25 |
| 339.96   | 10.5  |
| 339.9938 | 11    |
| 340.0338 | 13.25 |

|          |       |
|----------|-------|
| 338.4113 | 15.5  |
| 338.4463 | 16    |
| 338.4825 | 11.25 |
| 338.515  | 12.75 |
| 338.5463 | 13.75 |
| 338.5775 | 10    |
| 338.6125 | 11.75 |
| 338.6463 | 14.25 |
| 338.68   | 13    |
| 338.7125 | 13.75 |
| 338.7488 | 13.75 |
| 338.7825 | 15    |
| 338.8125 | 11.5  |
| 338.8438 | 12.75 |
| 338.8775 | 13.5  |
| 338.9113 | 16    |
| 338.9463 | 14.75 |
| 338.9825 | 11    |
| 339.015  | 13.75 |
| 339.0463 | 13.75 |
| 339.0775 | 13.25 |
| 339.1125 | 16.25 |
| 339.1463 | 10.75 |
| 339.18   | 14    |
| 339.2125 | 11.5  |
| 339.2488 | 16.25 |
| 339.2825 | 13.25 |
| 339.3125 | 16.25 |
| 339.3438 | 13.75 |
| 339.3775 | 14.25 |
| 339.4113 | 17.75 |
| 339.4463 | 19    |
| 339.4825 | 16    |
| 339.515  | 16    |
| 339.5463 | 15.25 |
| 339.5775 | 16.75 |
| 339.6125 | 16.5  |
| 339.6463 | 18.75 |
| 339.68   | 15.25 |
| 339.7125 | 18.25 |
| 339.7488 | 17.25 |
| 339.7825 | 16.75 |
| 339.8125 | 16.5  |
| 339.8463 | 15.25 |
| 339.8775 | 15.25 |
| 339.9113 | 16.75 |
| 339.9475 | 14.25 |
| 339.9863 | 18    |
| 340.0163 | 17.25 |
| 340.0475 | 15.25 |

|          |       |
|----------|-------|
| 340.0663 | 12    |
| 340.0975 | 10    |
| 340.1325 | 12.25 |
| 340.1625 | 13    |
| 340.1938 | 14.75 |
| 340.2288 | 12    |
| 340.265  | 11.5  |
| 340.3    | 14.25 |
| 340.3313 | 12.5  |
| 340.3663 | 13.5  |
| 340.3988 | 12.5  |
| 340.43   | 12    |
| 340.4613 | 12.25 |
| 340.4938 | 12.75 |
| 340.5338 | 12    |
| 340.5663 | 13    |
| 340.5975 | 10.5  |
| 340.6325 | 10.25 |
| 340.6625 | 12.75 |
| 340.6938 | 14    |
| 340.73   | 10.75 |
| 340.7663 | 14.5  |
| 340.8    | 15    |
| 340.8313 | 10.25 |
| 340.8663 | 11.5  |
| 340.8988 | 16    |
| 340.93   | 13.75 |
| 340.9613 | 16.25 |
| 340.9938 | 15    |
| 341.0338 | 13    |
| 341.0663 | 15.5  |
| 341.0975 | 16.25 |
| 341.1325 | 14    |
| 341.1625 | 16    |
| 341.1938 | 10.75 |
| 341.2288 | 12    |
| 341.2663 | 8.25  |
| 341.3    | 7.25  |
| 341.3313 | 8.75  |
| 341.3663 | 10    |
| 341.3988 | 8.5   |
| 341.43   | 7.75  |
| 341.4613 | 9.25  |
| 341.4938 | 10.25 |
| 341.5338 | 11    |
| 341.5663 | 8.25  |
| 341.5975 | 12    |
| 341.6325 | 11.75 |
| 341.6625 | 13.25 |
| 341.6938 | 11    |

|          |       |
|----------|-------|
| 340.0788 | 15    |
| 340.1138 | 15.5  |
| 340.1475 | 16.5  |
| 340.1825 | 22    |
| 340.2163 | 24.75 |
| 340.2513 | 14.5  |
| 340.285  | 18    |
| 340.315  | 16.5  |
| 340.3488 | 20    |
| 340.38   | 22    |
| 340.4125 | 18    |
| 340.4475 | 20    |
| 340.4863 | 17.25 |
| 340.5163 | 20    |
| 340.5475 | 19.25 |
| 340.5788 | 20.5  |
| 340.6138 | 17    |
| 340.6475 | 19.25 |
| 340.6825 | 19.25 |
| 340.7163 | 18.25 |
| 340.7513 | 20.75 |
| 340.785  | 22.75 |
| 340.815  | 16.5  |
| 340.8488 | 19.75 |
| 340.88   | 18.5  |
| 340.9125 | 21.5  |
| 340.9475 | 19.25 |
| 340.9863 | 20    |
| 341.0163 | 20    |
| 341.0475 | 20.25 |
| 341.0788 | 20.75 |
| 341.1138 | 18.75 |
| 341.1475 | 17.75 |
| 341.1825 | 20.25 |
| 341.2188 | 16.5  |
| 341.2513 | 20.25 |
| 341.285  | 19.25 |
| 341.315  | 25    |
| 341.3488 | 21    |
| 341.38   | 16.5  |
| 341.4125 | 21    |
| 341.4475 | 21.5  |
| 341.4838 | 21.25 |
| 341.5163 | 20    |
| 341.5475 | 26.5  |
| 341.58   | 18.25 |
| 341.6138 | 20.75 |
| 341.6475 | 22.25 |
| 341.6825 | 17.75 |
| 341.7188 | 22.25 |

|          |       |
|----------|-------|
| 341.7288 | 7.5   |
| 341.7638 | 10.75 |
| 341.8    | 8.25  |
| 341.8313 | 11    |
| 341.8688 | 9.5   |
| 341.8988 | 11.75 |
| 341.93   | 12.25 |
| 341.9613 | 14    |
| 341.9938 | 10.75 |
| 342.0313 | 12.25 |
| 342.0663 | 13    |
| 342.0975 | 8.5   |
| 342.1325 | 5.5   |
| 342.1625 | 10.5  |
| 342.1938 | 7.25  |
| 342.2288 | 9     |
| 342.2638 | 7.25  |
| 342.3    | 11.75 |
| 342.3313 | 10    |
| 342.3688 | 8.25  |
| 342.3988 | 6.75  |
| 342.43   | 10.25 |
| 342.4613 | 10.5  |
| 342.4938 | 8     |
| 342.5313 | 9.25  |
| 342.5663 | 8.5   |
| 342.5975 | 7     |
| 342.6325 | 7.25  |
| 342.6625 | 7.5   |
| 342.6938 | 7.75  |
| 342.7288 | 10    |
| 342.7638 | 10.5  |
| 342.8    | 5.75  |
| 342.8313 | 9.5   |
| 342.8688 | 11    |
| 342.8988 | 8.75  |
| 342.93   | 11.5  |
| 342.9613 | 14.75 |
| 342.9938 | 11    |
| 343.0313 | 11.5  |
| 343.0663 | 13    |
| 343.0975 | 16.5  |
| 343.1325 | 13.25 |
| 343.1625 | 14    |
| 343.1938 | 15    |
| 343.2288 | 16    |
| 343.2638 | 12.75 |
| 343.3    | 13.25 |
| 343.3313 | 14.25 |
| 343.3688 | 15.5  |

|          |       |
|----------|-------|
| 341.7513 | 17.5  |
| 341.785  | 22.25 |
| 341.815  | 24.75 |
| 341.8488 | 22.75 |
| 341.88   | 21    |
| 341.9125 | 19.75 |
| 341.95   | 21.75 |
| 341.9838 | 19.5  |
| 342.0163 | 20.5  |
| 342.0475 | 16    |
| 342.08   | 19.75 |
| 342.1138 | 19.25 |
| 342.1475 | 20.75 |
| 342.1825 | 20.5  |
| 342.2188 | 20.25 |
| 342.2525 | 23.5  |
| 342.285  | 19    |
| 342.315  | 19.25 |
| 342.3488 | 22    |
| 342.38   | 21.5  |
| 342.4125 | 21    |
| 342.4525 | 24.5  |
| 342.4838 | 18    |
| 342.5163 | 21.25 |
| 342.5475 | 20    |
| 342.58   | 20    |
| 342.6138 | 22    |
| 342.6475 | 21.25 |
| 342.6825 | 21.5  |
| 342.7188 | 19.5  |
| 342.7513 | 18    |
| 342.785  | 18.5  |
| 342.815  | 18.75 |
| 342.8488 | 21.75 |
| 342.88   | 19.5  |
| 342.9125 | 23.25 |
| 342.9525 | 22    |
| 342.9838 | 21.25 |
| 343.0163 | 21.5  |
| 343.0475 | 22    |
| 343.08   | 20    |
| 343.1138 | 20.75 |
| 343.1475 | 17.25 |
| 343.1825 | 21    |
| 343.2188 | 16.75 |
| 343.2513 | 18.5  |
| 343.285  | 18.25 |
| 343.315  | 14.25 |
| 343.3488 | 20    |
| 343.38   | 16.25 |

|          |       |          |       |
|----------|-------|----------|-------|
| 343.3988 | 13    | 343.4125 | 14.5  |
| 343.43   | 11.5  | 343.4525 | 18    |
| 343.4613 | 16    | 343.4838 | 14.25 |
| 343.4963 | 13.25 | 343.5163 | 16.75 |
| 343.5313 | 14.25 | 343.5475 | 15.75 |
| 343.5663 | 11.75 | 343.58   | 16.5  |
| 343.5975 | 13.25 | 343.6138 | 17    |
| 343.6325 | 13.5  | 343.6475 | 19    |
| 343.6625 | 10.75 | 343.6825 | 17.25 |
| 343.6963 | 10.5  | 343.7188 | 20    |
| 343.7288 | 13.75 | 343.75   | 19.25 |
| 343.7638 | 11.75 | 343.785  | 24.75 |
| 343.8    | 13.25 | 343.8175 | 17.75 |
| 343.8313 | 13.25 | 343.8488 | 19    |
| 343.8688 | 11.25 | 343.88   | 17.25 |
| 343.8988 | 13    | 343.91   | 21.75 |
| 343.93   | 15    | 343.9525 | 19.25 |
| 343.9613 | 13.5  | 343.9838 | 18.75 |
| 343.9963 | 14    | 344.0163 | 18.5  |
| 344.0313 | 14.75 | 344.0475 | 19.5  |
| 344.0663 | 15.25 | 344.08   | 24.75 |
| 344.0975 | 11.5  | 344.1138 | 19.5  |
| 344.1325 | 16.5  | 344.1475 | 17.5  |
| 344.1625 | 14    | 344.1838 | 21.75 |
| 344.1963 | 14.5  | 344.2188 | 19.5  |
| 344.2288 | 12.5  | 344.25   | 23.75 |
| 344.2638 | 13.75 | 344.285  | 18.5  |
| 344.3    | 14.75 | 344.3175 | 20    |
| 344.3313 | 13.25 | 344.3488 | 21.5  |
| 344.3688 | 15.25 | 344.38   | 17.5  |
| 344.3988 | 11.25 | 344.41   | 21    |
| 344.43   | 11.25 | 344.4525 | 23.5  |
| 344.4613 | 19.5  | 344.4838 | 18.75 |
| 344.4963 | 15.5  | 344.5163 | 20.5  |
| 344.5313 | 10.75 | 344.55   | 23.25 |
| 344.5663 | 11.75 | 344.5825 | 26    |
| 344.5988 | 12.5  | 344.6138 | 20    |
| 344.6325 | 14    | 344.6475 | 22.5  |
| 344.6625 | 12.5  | 344.6838 | 26.25 |
| 344.6963 | 12.5  | 344.7188 | 22    |
| 344.7288 | 9.5   | 344.75   | 17.5  |
| 344.7638 | 11    | 344.785  | 20.5  |
| 344.8    | 11.5  | 344.8175 | 20    |
| 344.8313 | 13.75 | 344.8488 | 20.5  |
| 344.8688 | 11.25 | 344.88   | 19    |
| 344.8988 | 13.25 | 344.91   | 22    |
| 344.93   | 12.5  | 344.9525 | 19.5  |
| 344.9613 | 11.75 | 344.9838 | 23    |
| 344.9963 | 12.25 | 345.0163 | 20.5  |
| 345.0313 | 15.75 | 345.0475 | 20.25 |

|          |       |          |       |
|----------|-------|----------|-------|
| 345.0663 | 11.25 | 345.08   | 20.25 |
| 345.0988 | 10.25 | 345.1138 | 18.5  |
| 345.1325 | 10.75 | 345.1475 | 21    |
| 345.1625 | 10    | 345.1838 | 19.5  |
| 345.1963 | 15    | 345.2188 | 21.25 |
| 345.2288 | 11.5  | 345.25   | 19.5  |
| 345.2638 | 12    | 345.2863 | 17.5  |
| 345.3    | 12    | 345.3175 | 19.25 |
| 345.3313 | 10.75 | 345.3488 | 17.5  |
| 345.3688 | 13    | 345.38   | 18.5  |
| 345.3988 | 12.5  | 345.41   | 21.5  |
| 345.43   | 14.5  | 345.4525 | 17.25 |
| 345.4613 | 9     | 345.4838 | 18.5  |
| 345.4963 | 12.75 | 345.5163 | 19    |
| 345.5338 | 12    | 345.5475 | 17.25 |
| 345.5663 | 18    | 345.58   | 17.75 |
| 345.5988 | 16.5  | 345.6138 | 20    |
| 345.6325 | 13.5  | 345.6475 | 21.25 |
| 345.6625 | 10.75 | 345.6838 | 17.5  |
| 345.6963 | 15.25 | 345.7188 | 21    |
| 345.7288 | 15.5  | 345.75   | 21.25 |
| 345.7638 | 13.25 | 345.785  | 18.25 |
| 345.7988 | 13.25 | 345.8175 | 18.25 |
| 345.8313 | 15    | 345.8488 | 18.5  |
| 345.8688 | 19.25 | 345.88   | 17.75 |
| 345.8988 | 16.5  | 345.9125 | 14.25 |
| 345.93   | 17.25 | 345.9525 | 20    |
| 345.9613 | 16    | 345.9838 | 13.25 |
| 345.9963 | 12.25 | 346.0163 | 17.75 |
| 346.0338 | 12.75 | 346.0475 | 16.75 |
| 346.0663 | 11.75 | 346.08   | 15    |
| 346.0988 | 12    | 346.1138 | 15.25 |
| 346.1325 | 11.25 | 346.1475 | 15.5  |
| 346.1625 | 11    | 346.1838 | 16.75 |
| 346.1963 | 8.25  | 346.2188 | 16.25 |
| 346.2288 | 10.5  | 346.25   | 18    |
| 346.2663 | 8.5   | 346.285  | 14.5  |
| 346.2988 | 9.75  | 346.3175 | 17    |
| 346.3313 | 12.25 | 346.3488 | 15.75 |
| 346.3688 | 12    | 346.38   | 17    |
| 346.3988 | 11.25 | 346.4125 | 18.5  |
| 346.43   | 11    | 346.4525 | 16.75 |
| 346.4613 | 12.75 | 346.4838 | 19.5  |
| 346.4963 | 11.75 | 346.5138 | 18.25 |
| 346.5338 | 13.25 | 346.5488 | 18    |
| 346.5663 | 14    | 346.58   | 19.25 |
| 346.5988 | 16.25 | 346.6138 | 19.5  |
| 346.6325 | 10.75 | 346.6475 | 15.25 |
| 346.6625 | 9.25  | 346.6838 | 15.5  |
| 346.6963 | 13    | 346.7188 | 12.5  |



|          |       |          |       |
|----------|-------|----------|-------|
| 346.73   | 14.75 | 346.75   | 21.5  |
| 346.7638 | 14    | 346.785  | 23.75 |
| 346.7988 | 11.25 | 346.8175 | 15.75 |
| 346.8338 | 14    | 346.85   | 19.75 |
| 346.8688 | 11.5  | 346.88   | 20.25 |
| 346.8988 | 11.75 | 346.9125 | 18.5  |
| 346.9313 | 12.25 | 346.95   | 20    |
| 346.9613 | 11.25 | 346.985  | 15.5  |
| 346.9975 | 10.5  | 347.0138 | 16.5  |
| 347.0338 | 12    | 347.0488 | 18    |
| 347.0663 | 11    | 347.0825 | 18    |
| 347.0988 | 13.75 | 347.1138 | 17    |
| 347.1325 | 13.25 | 347.1475 | 18.5  |
| 347.1625 | 11.75 | 347.1838 | 17.5  |
| 347.1963 | 10.75 | 347.2188 | 21    |
| 347.23   | 11.25 | 347.25   | 16.25 |
| 347.2638 | 13.25 | 347.285  | 15.5  |
| 347.2988 | 9.25  | 347.3175 | 14.75 |
| 347.3338 | 9     | 347.3488 | 16    |
| 347.3688 | 11.25 | 347.38   | 16.5  |
| 347.3988 | 10.75 | 347.4125 | 15.25 |
| 347.43   | 10.75 | 347.45   | 14    |
| 347.4613 | 11.25 | 347.4838 | 18.75 |
| 347.4963 | 11.25 | 347.5138 | 18.25 |
| 347.5338 | 11.75 | 347.5488 | 16    |
| 347.5663 | 14    | 347.58   | 18    |
| 347.6013 | 16.25 | 347.6138 | 22.5  |
| 347.6325 | 14    | 347.6475 | 22    |
| 347.6625 | 17.5  | 347.685  | 23.25 |
| 347.6963 | 16.5  | 347.7188 | 20.75 |
| 347.73   | 19.25 | 347.75   | 19.75 |
| 347.7638 | 15    | 347.785  | 15.75 |
| 347.7988 | 16.5  | 347.8175 | 20    |
| 347.8338 | 18.5  | 347.8488 | 18    |
| 347.8688 | 20    | 347.88   | 16.75 |
| 347.8988 | 14.5  | 347.9125 | 19.75 |
| 347.93   | 16.25 | 347.95   | 17.25 |
| 347.9613 | 15    | 347.9838 | 18.75 |
| 347.9963 | 14.75 | 348.0138 | 19.25 |
| 348.0338 | 12.5  | 348.0488 | 20    |
| 348.0663 | 13.5  | 348.08   | 21.75 |
| 348.1013 | 11.25 | 348.1138 | 17.25 |
| 348.1325 | 13.25 | 348.1475 | 17.75 |
| 348.1625 | 9.75  | 348.185  | 24    |
| 348.1963 | 9.5   | 348.2188 | 21    |
| 348.23   | 12.25 | 348.25   | 20.75 |
| 348.2638 | 14    | 348.285  | 19    |
| 348.2988 | 12.25 | 348.3175 | 15.5  |
| 348.3338 | 13.5  | 348.3513 | 18    |
| 348.3688 | 12.5  | 348.38   | 18.25 |

|          |       |          |       |
|----------|-------|----------|-------|
| 348.3988 | 14.75 | 348.415  | 21.75 |
| 348.43   | 12.25 | 348.4525 | 17.5  |
| 348.4613 | 15.25 | 348.4838 | 14.75 |
| 348.4963 | 12.5  | 348.5138 | 17    |
| 348.5338 | 12.5  | 348.5488 | 15.75 |
| 348.5638 | 16    | 348.58   | 16    |
| 348.6013 | 11.25 | 348.6138 | 19.5  |
| 348.6325 | 16.75 | 348.6475 | 17    |
| 348.6625 | 15.25 | 348.6838 | 14    |
| 348.6963 | 15.75 | 348.7188 | 16    |
| 348.73   | 13.75 | 348.75   | 12.25 |
| 348.7638 | 14.75 | 348.7825 | 14.5  |
| 348.7988 | 13.75 | 348.8175 | 17.25 |
| 348.8338 | 11.5  | 348.8488 | 14    |
| 348.8688 | 9.25  | 348.88   | 17.5  |
| 348.8988 | 16.5  | 348.915  | 16.75 |
| 348.93   | 13.5  | 348.95   | 17.75 |
| 348.9613 | 11.5  | 348.9838 | 17.75 |
| 348.9963 | 13.5  | 349.0138 | 18.75 |
| 349.0338 | 13.75 | 349.0488 | 15.25 |
| 349.065  | 11.25 | 349.08   | 15    |
| 349.1013 | 15.5  | 349.1138 | 19    |
| 349.135  | 10.75 | 349.1475 | 21.75 |
| 349.1625 | 12    | 349.1838 | 16.5  |
| 349.1963 | 15.25 | 349.2188 | 16    |
| 349.23   | 14.75 | 349.25   | 14.5  |
| 349.2638 | 14.75 | 349.2825 | 17.75 |
| 349.2988 | 14.75 | 349.3175 | 18.5  |
| 349.335  | 13.25 | 349.3488 | 16    |
| 349.3713 | 13    | 349.38   | 18    |
| 349.3988 | 15.5  | 349.415  | 17.25 |
| 349.43   | 11.25 | 349.45   | 20.5  |
| 349.4613 | 11.75 | 349.4838 | 18.75 |
| 349.4963 | 15.5  | 349.5138 | 20.5  |
| 349.5338 | 9.25  | 349.5488 | 20    |
| 349.565  | 12.25 | 349.58   | 17.75 |
| 349.6013 | 13.5  | 349.6138 | 21.75 |
| 349.6325 | 14.75 | 349.6488 | 20.75 |
| 349.6625 | 13.25 | 349.6838 | 22.5  |
| 349.6963 | 14    | 349.7188 | 24.25 |
| 349.73   | 16.25 | 349.75   | 23.5  |
| 349.7638 | 17.75 | 349.7825 | 24    |
| 349.7988 | 15.25 | 349.8175 | 24.5  |
| 349.8338 | 12    | 349.8488 | 23.25 |
| 349.8713 | 14.5  | 349.88   | 22.5  |
| 349.8988 | 12.75 | 349.915  | 18.25 |
| 349.93   | 12.5  | 349.95   | 25    |
| 349.9613 | 10.5  | 349.9838 | 18.25 |
| 349.9963 | 10.75 | 350.0138 | 25.5  |
| 350.0338 | 11.75 | 350.0488 | 22.75 |

|          |       |          |       |
|----------|-------|----------|-------|
| 350.065  | 14.25 | 350.08   | 25.75 |
| 350.1013 | 13.25 | 350.1138 | 22.5  |
| 350.1325 | 11    | 350.1488 | 26    |
| 350.1625 | 11.5  | 350.1838 | 22.5  |
| 350.1963 | 11.5  | 350.2188 | 27.25 |
| 350.23   | 13.5  | 350.25   | 17.25 |
| 350.2638 | 11.75 | 350.2825 | 21.5  |
| 350.2988 | 11.25 | 350.3175 | 21.25 |
| 350.3338 | 14.75 | 350.3488 | 17    |
| 350.3688 | 14.75 | 350.38   | 24    |
| 350.3988 | 14    | 350.415  | 23.75 |
| 350.43   | 12.75 | 350.45   | 22.25 |
| 350.465  | 13    | 350.4838 | 21.25 |
| 350.4963 | 14.75 | 350.5138 | 25.5  |
| 350.5338 | 14.25 | 350.5488 | 26.75 |
| 350.565  | 15    | 350.58   | 20.25 |
| 350.6013 | 11.75 | 350.6138 | 19.5  |
| 350.6325 | 11.25 | 350.6488 | 18.5  |
| 350.6625 | 11.25 | 350.6838 | 19.5  |
| 350.6963 | 10.25 | 350.7188 | 22.5  |
| 350.73   | 12.5  | 350.75   | 25.25 |
| 350.7638 | 10    | 350.7825 | 20.25 |
| 350.7988 | 14.5  | 350.8175 | 19.75 |
| 350.8338 | 8     | 350.8488 | 21    |
| 350.8688 | 11    | 350.88   | 24    |
| 350.8988 | 8.75  | 350.915  | 23    |
| 350.93   | 12.5  | 350.95   | 21    |
| 350.9638 | 11.5  | 350.9838 | 19.75 |
| 350.9963 | 12    | 351.0138 | 15.5  |
| 351.0338 | 13.5  | 351.0488 | 24.5  |
| 351.065  | 12.5  | 351.08   | 20    |
| 351.1013 | 8.75  | 351.1138 | 19    |
| 351.1325 | 9.75  | 351.1488 | 20.25 |
| 351.1625 | 8.75  | 351.1838 | 22.75 |
| 351.1938 | 10.5  | 351.2188 | 21.25 |
| 351.23   | 9.75  | 351.25   | 17.25 |
| 351.2625 | 10.25 | 351.2825 | 21.25 |
| 351.2988 | 13.25 | 351.3175 | 21.25 |
| 351.3313 | 10.25 | 351.3488 | 20.75 |
| 351.3688 | 13.75 | 351.38   | 18.25 |
| 351.3988 | 14    | 351.4175 | 20.25 |
| 351.4313 | 15.75 | 351.45   | 23    |
| 351.465  | 14    | 351.4838 | 18.75 |
| 351.4988 | 10.5  | 351.5138 | 13.75 |
| 351.5363 | 14.25 | 351.5488 | 16    |
| 351.5675 | 11.5  | 351.58   | 15.25 |
| 351.6038 | 12    | 351.6138 | 20.5  |
| 351.635  | 12    | 351.6488 | 17.75 |
| 351.665  | 13.5  | 351.6838 | 16    |
| 351.6963 | 8.75  | 351.7175 | 21    |

|          |       |          |       |
|----------|-------|----------|-------|
| 351.7325 | 6     | 351.75   | 19.25 |
| 351.7638 | 13.75 | 351.785  | 19.75 |
| 351.8025 | 10    | 351.8175 | 17    |
| 351.835  | 11    | 351.8488 | 17.5  |
| 351.87   | 12.5  | 351.88   | 18    |
| 351.9    | 13    | 351.9175 | 18.5  |
| 351.9313 | 10.75 | 351.95   | 14.5  |
| 351.965  | 13.5  | 351.9838 | 15.75 |
| 351.9988 | 11.75 | 352.0138 | 17.75 |
| 352.0363 | 9     | 352.0475 | 16.5  |
| 352.0675 | 6.5   | 352.08   | 20.5  |
| 352.1038 | 11.75 | 352.1138 | 19.5  |
| 352.135  | 8     | 352.1488 | 21.5  |
| 352.165  | 13.25 | 352.1863 | 20    |
| 352.1963 | 12.75 | 352.2175 | 23.75 |
| 352.2325 | 11    | 352.25   | 22.5  |
| 352.2638 | 11.5  | 352.285  | 24.25 |
| 352.3025 | 11    | 352.3175 | 18    |
| 352.335  | 11.5  | 352.3488 | 23.5  |
| 352.37   | 11.5  | 352.38   | 18.25 |
| 352.4    | 10.75 | 352.4175 | 17.75 |
| 352.4313 | 16.75 | 352.45   | 20.5  |
| 352.465  | 14.25 | 352.4838 | 21.75 |
| 352.4988 | 10.25 | 352.5138 | 19    |
| 352.5363 | 15.5  | 352.5475 | 18.25 |
| 352.5675 | 11.75 | 352.58   | 18.25 |
| 352.6038 | 16    | 352.6138 | 17    |
| 352.635  | 8.25  | 352.6488 | 18.75 |
| 352.665  | 12    | 352.6838 | 21    |
| 352.6963 | 7.5   | 352.7175 | 18.75 |
| 352.7325 | 12.5  | 352.75   | 23.25 |
| 352.7638 | 9.25  | 352.785  | 17.5  |
| 352.8025 | 10    | 352.8175 | 22.75 |
| 352.835  | 10.5  | 352.85   | 18.75 |
| 352.87   | 10.5  | 352.88   | 22.5  |
| 352.9    | 12.25 | 352.9175 | 20.25 |
| 352.9338 | 13.75 | 352.95   | 19.75 |
| 352.965  | 14.5  | 352.9838 | 25    |
| 352.9988 | 16    | 353.0138 | 20.5  |
| 353.0363 | 15.5  | 353.0475 | 20.75 |
| 353.0675 | 15    | 353.0825 | 22.75 |
| 353.1025 | 11.25 | 353.1138 | 18    |
| 353.135  | 12.25 | 353.1488 | 26    |
| 353.165  | 10.5  | 353.1838 | 21.25 |
| 353.1963 | 12.5  | 353.2175 | 19.75 |
| 353.2325 | 11.75 | 353.25   | 20    |
| 353.2638 | 10.25 | 353.285  | 23.25 |
| 353.3025 | 10.75 | 353.3175 | 20    |
| 353.335  | 12    | 353.3488 | 20    |
| 353.37   | 9.25  | 353.38   | 24.5  |

|          |       |          |       |
|----------|-------|----------|-------|
| 353.4    | 13    | 353.4175 | 24    |
| 353.4313 | 10.75 | 353.4475 | 22.25 |
| 353.465  | 9.75  | 353.4838 | 24.5  |
| 353.4988 | 18.75 | 353.5138 | 24.5  |
| 353.5338 | 12.5  | 353.5475 | 23.5  |
| 353.5675 | 12.75 | 353.58   | 23.5  |
| 353.6025 | 15.25 | 353.6138 | 24.5  |
| 353.635  | 12.5  | 353.6488 | 22.75 |
| 353.6663 | 11.25 | 353.6838 | 22.25 |
| 353.6963 | 11.5  | 353.7175 | 22.5  |
| 353.7325 | 15.5  | 353.75   | 27.25 |
| 353.7638 | 13.5  | 353.785  | 28.5  |
| 353.8025 | 12    | 353.8175 | 23.75 |
| 353.835  | 15.75 | 353.8488 | 20    |
| 353.87   | 16.5  | 353.88   | 21    |
| 353.9    | 12.75 | 353.9175 | 24    |
| 353.9313 | 13.75 | 353.9475 | 24.25 |
| 353.965  | 12.25 | 353.9838 | 20.5  |
| 353.9988 | 14.5  | 354.0138 | 21.5  |
| 354.0338 | 11.5  | 354.0475 | 22    |
| 354.0675 | 12.5  | 354.08   | 19    |
| 354.1025 | 15    | 354.1138 | 23.5  |
| 354.135  | 11.5  | 354.1488 | 23.75 |
| 354.165  | 13    | 354.1838 | 24    |
| 354.1963 | 18.75 | 354.2175 | 22    |
| 354.2325 | 18    | 354.25   | 22.75 |
| 354.2638 | 17.25 | 354.285  | 20.5  |
| 354.3025 | 13.25 | 354.3175 | 21.5  |
| 354.335  | 16.5  | 354.3488 | 16.5  |
| 354.37   | 12.75 | 354.38   | 27.5  |
| 354.4    | 14.75 | 354.4175 | 19    |
| 354.4313 | 13.25 | 354.4475 | 22    |
| 354.465  | 15    | 354.4838 | 20.25 |
| 354.4988 | 13.25 | 354.5138 | 21.75 |
| 354.5325 | 13.75 | 354.5475 | 26.25 |
| 354.5675 | 14    | 354.58   | 21.5  |
| 354.6025 | 16    | 354.6138 | 22    |
| 354.635  | 10.5  | 354.6488 | 20.5  |
| 354.665  | 12    | 354.6838 | 19.25 |
| 354.6963 | 11.5  | 354.7175 | 20.25 |
| 354.7325 | 13    | 354.75   | 20.25 |
| 354.7638 | 11.5  | 354.785  | 18    |
| 354.8025 | 15.5  | 354.8175 | 19.25 |
| 354.835  | 14.25 | 354.85   | 15.75 |
| 354.87   | 9.5   | 354.88   | 19.5  |
| 354.9    | 10.25 | 354.9175 | 16.75 |
| 354.9313 | 10.75 | 354.9475 | 17.75 |
| 354.965  | 10.75 | 354.9838 | 19.25 |
| 354.9988 | 10.75 | 355.0138 | 21.5  |
| 355.0325 | 9.25  | 355.05   | 15.5  |

|          |       |          |       |
|----------|-------|----------|-------|
| 355.0675 | 11.75 | 355.08   | 16.5  |
| 355.1025 | 9.5   | 355.1138 | 22.75 |
| 355.135  | 12.75 | 355.1488 | 19.75 |
| 355.165  | 10.25 | 355.1838 | 20.25 |
| 355.1963 | 9.25  | 355.2175 | 18    |
| 355.2325 | 10.5  | 355.25   | 17    |
| 355.2638 | 11.75 | 355.285  | 19.75 |
| 355.3025 | 9.5   | 355.3175 | 22.5  |
| 355.335  | 10.25 | 355.3488 | 17    |
| 355.3675 | 7.5   | 355.38   | 18.5  |
| 355.4    | 13    | 355.4175 | 23.25 |
| 355.4313 | 9.5   | 355.4475 | 22    |
| 355.465  | 11.25 | 355.4838 | 16    |
| 355.4988 | 11.75 | 355.5138 | 17.25 |
| 355.5325 | 11    | 355.5475 | 20.25 |
| 355.5675 | 11    | 355.58   | 19    |
| 355.6025 | 12.5  | 355.6138 | 20.25 |
| 355.635  | 11.25 | 355.6488 | 14.75 |
| 355.665  | 13    | 355.6838 | 20.5  |
| 355.6963 | 10.75 | 355.7175 | 18.75 |
| 355.7325 | 11.25 | 355.75   | 23.5  |
| 355.7638 | 12.5  | 355.785  | 20.75 |
| 355.8025 | 14.25 | 355.815  | 15.25 |
| 355.835  | 10.75 | 355.8488 | 22.25 |
| 355.8675 | 15.25 | 355.88   | 18.25 |
| 355.9    | 15.5  | 355.9175 | 20.5  |
| 355.9313 | 11    | 355.9475 | 22    |
| 355.965  | 14.5  | 355.9838 | 20    |
| 355.9988 | 12.75 | 356.015  | 18.5  |
| 356.0325 | 13    | 356.0488 | 21.75 |
| 356.0675 | 13.25 | 356.085  | 18.75 |
| 356.1025 | 13    | 356.115  | 23.25 |
| 356.135  | 13.5  | 356.15   | 20    |
| 356.165  | 12.25 | 356.1875 | 24.5  |
| 356.1963 | 13.25 | 356.22   | 20.25 |
| 356.2325 | 14.75 | 356.2525 | 19.5  |
| 356.2638 | 14    | 356.2875 | 15.5  |
| 356.3025 | 13.25 | 356.3175 | 16.5  |
| 356.335  | 12.5  | 356.3525 | 18    |
| 356.3675 | 12.5  | 356.385  | 20.25 |
| 356.4    | 13.75 | 356.42   | 15.5  |
| 356.4313 | 12.75 | 356.45   | 15.5  |
| 356.4638 | 13.5  | 356.485  | 16.25 |
| 356.4988 | 14    | 356.515  | 12.75 |
| 356.5325 | 9.75  | 356.5488 | 17    |
| 356.5675 | 12.75 | 356.5825 | 21.5  |
| 356.6025 | 10.5  | 356.615  | 19.75 |
| 356.635  | 9.75  | 356.6513 | 19.25 |
| 356.665  | 9.75  | 356.685  | 20.75 |
| 356.6963 | 9.75  | 356.72   | 22    |

|          |       |          |       |
|----------|-------|----------|-------|
| 356.7325 | 11    | 356.7525 | 26    |
| 356.7638 | 10.25 | 356.7875 | 17    |
| 356.8025 | 11.5  | 356.8175 | 21.5  |
| 356.835  | 9.5   | 356.8525 | 21.75 |
| 356.8675 | 11.5  | 356.8875 | 18.25 |
| 356.9    | 13.25 | 356.92   | 22.75 |
| 356.9313 | 12.5  | 356.95   | 20.5  |
| 356.9638 | 11.25 | 356.985  | 23.5  |
| 356.9988 | 13.5  | 357.015  | 17.75 |
| 357.0325 | 8.75  | 357.0488 | 21.5  |
| 357.0675 | 10.5  | 357.0825 | 17.5  |
| 357.1025 | 13.75 | 357.115  | 20.75 |
| 357.1338 | 13    | 357.1525 | 21.25 |
| 357.165  | 14.75 | 357.185  | 22.25 |
| 357.1963 | 13    | 357.22   | 22.25 |
| 357.2325 | 14    | 357.2525 | 19    |
| 357.2638 | 16.75 | 357.2875 | 22    |
| 357.3025 | 15.5  | 357.3175 | 20.25 |
| 357.335  | 16    | 357.3525 | 19    |
| 357.3675 | 15    | 357.385  | 20.75 |
| 357.4    | 15.5  | 357.42   | 20.5  |
| 357.4313 | 20    | 357.45   | 19    |
| 357.4638 | 17.25 | 357.485  | 23.5  |
| 357.4988 | 16    | 357.515  | 19.25 |
| 357.5325 | 11.75 | 357.5488 | 19.5  |
| 357.5675 | 14.5  | 357.5813 | 17.5  |
| 357.6025 | 14.5  | 357.615  | 20.25 |
| 357.6338 | 17.25 | 357.6525 | 19.5  |
| 357.665  | 15    | 357.685  | 18.25 |
| 357.6963 | 13.25 | 357.72   | 13.25 |
| 357.7325 | 12    | 357.7525 | 19.25 |
| 357.7638 | 14.75 | 357.7875 | 25.5  |
| 357.8    | 13    | 357.8175 | 18.75 |
| 357.835  | 14.5  | 357.8525 | 13.75 |
| 357.8675 | 14    | 357.885  | 15.25 |
| 357.9    | 14.75 | 357.92   | 15.25 |
| 357.9313 | 17    | 357.95   | 18.5  |
| 357.9638 | 13    | 357.985  | 17    |
| 358.0013 | 15    | 358.015  | 18.25 |
| 358.0325 | 18.5  | 358.0488 | 17    |
| 358.0675 | 12.5  | 358.0813 | 22.25 |
| 358.1025 | 12.75 | 358.115  | 22.75 |
| 358.1338 | 12.25 | 358.1525 | 18.5  |
| 358.165  | 13.25 | 358.185  | 16.75 |
| 358.1963 | 14.5  | 358.22   | 15.75 |
| 358.2325 | 13.25 | 358.2525 | 18    |
| 358.2638 | 13.75 | 358.2875 | 15.5  |
| 358.3    | 11.75 | 358.3175 | 20.25 |
| 358.335  | 14.75 | 358.3525 | 23.25 |
| 358.3675 | 10.75 | 358.385  | 19.25 |

|          |       |          |       |
|----------|-------|----------|-------|
| 358.4    | 9.25  | 358.42   | 19    |
| 358.4313 | 8.5   | 358.45   | 21.25 |
| 358.4638 | 11.75 | 358.485  | 17.5  |
| 358.5013 | 11    | 358.515  | 21    |
| 358.5325 | 10.75 | 358.5488 | 19.25 |
| 358.5675 | 11    | 358.5813 | 21.75 |
| 358.6025 | 11.25 | 358.615  | 18.25 |
| 358.6338 | 10.25 | 358.6525 | 19.25 |
| 358.665  | 13    | 358.685  | 20.25 |
| 358.6963 | 11.25 | 358.72   | 15    |
| 358.7325 | 14.25 | 358.7525 | 22.25 |
| 358.7638 | 10.75 | 358.7875 | 25.25 |
| 358.8    | 11.25 | 358.8175 | 22.75 |
| 358.835  | 10    | 358.85   | 19    |
| 358.8675 | 13.5  | 358.885  | 18.25 |
| 358.9    | 15.75 | 358.92   | 20    |
| 358.9313 | 15.75 | 358.95   | 18.5  |
| 358.9638 | 12.5  | 358.985  | 18    |
| 359.0025 | 15.5  | 359.015  | 20.25 |
| 359.0325 | 14.25 | 359.0488 | 17    |
| 359.0675 | 19.75 | 359.0813 | 16.5  |
| 359.1025 | 11.25 | 359.115  | 21.25 |
| 359.1338 | 13.75 | 359.1525 | 17.5  |
| 359.165  | 13.5  | 359.185  | 19.5  |
| 359.1963 | 14    | 359.22   | 17.5  |
| 359.2325 | 12.5  | 359.2525 | 17.75 |
| 359.2638 | 13.25 | 359.2875 | 17    |
| 359.3    | 9     | 359.3175 | 17.75 |
| 359.335  | 13    | 359.35   | 18.75 |
| 359.3675 | 12.75 | 359.385  | 18.75 |
| 359.3975 | 10    | 359.42   | 18    |
| 359.4313 | 11.5  | 359.45   | 19    |
| 359.4638 | 11.25 | 359.485  | 20.5  |
| 359.5013 | 12.5  | 359.515  | 19.25 |
| 359.5325 | 12.25 | 359.5488 | 22.25 |
| 359.5675 | 11.25 | 359.5813 | 17.25 |
| 359.6025 | 12.75 | 359.615  | 19.5  |
| 359.6338 | 11.5  | 359.6525 | 19.5  |
| 359.665  | 14.5  | 359.685  | 19    |
| 359.6963 | 13.5  | 359.72   | 17.5  |
| 359.7325 | 11.75 | 359.7525 | 18.5  |
| 359.7638 | 11.5  | 359.785  | 14.5  |
| 359.8    | 13    | 359.8175 | 19.25 |
| 359.835  | 11.25 | 359.85   | 17.25 |
| 359.8675 | 9     | 359.885  | 17    |
| 359.8975 | 12.5  | 359.92   | 15.5  |
| 359.9313 | 14.75 | 359.95   | 19.5  |
| 359.9638 | 17    | 359.985  | 15.25 |
| 360.0013 | 13    | 360.015  | 15    |
| 360.0325 | 16.5  | 360.0488 | 14    |



|          |       |          |       |
|----------|-------|----------|-------|
| 360.0675 | 12.75 | 360.0813 | 17.75 |
| 360.1025 | 14.5  | 360.1138 | 18    |
| 360.1338 | 14.75 | 360.1525 | 19.75 |
| 360.165  | 15.5  | 360.185  | 14.75 |
| 360.1963 | 14    | 360.22   | 18.75 |
| 360.2325 | 12.75 | 360.2538 | 16.75 |
| 360.2638 | 16.25 | 360.285  | 17.75 |
| 360.3    | 16.75 | 360.3188 | 16.25 |
| 360.335  | 14.25 | 360.35   | 21.25 |
| 360.3675 | 14.25 | 360.385  | 19.5  |
| 360.3975 | 10.5  | 360.4225 | 17.75 |
| 360.4313 | 12    | 360.45   | 17.5  |
| 360.4663 | 14    | 360.485  | 18.25 |
| 360.5013 | 9     | 360.515  | 16    |
| 360.5325 | 15    | 360.5488 | 15.25 |
| 360.5663 | 8.75  | 360.5813 | 14.75 |
| 360.6025 | 12.25 | 360.6138 | 21.5  |
| 360.6338 | 14.25 | 360.6525 | 17.25 |
| 360.665  | 14.5  | 360.685  | 20    |
| 360.6963 | 11.25 | 360.72   | 16.75 |
| 360.7325 | 11.25 | 360.7525 | 17    |
| 360.7638 | 9.5   | 360.785  | 16    |
| 360.7988 | 10.75 | 360.8175 | 20.75 |
| 360.835  | 13.75 | 360.85   | 17.25 |
| 360.8675 | 13.25 | 360.885  | 18    |
| 360.8975 | 13    | 360.92   | 20.75 |
| 360.9313 | 13.75 | 360.95   | 19.5  |
| 360.9638 | 13.25 | 360.985  | 17    |
| 361.0013 | 13.25 | 361.015  | 14.75 |
| 361.0325 | 10.5  | 361.0488 | 15.5  |
| 361.0663 | 9.5   | 361.0813 | 19    |
| 361.1025 | 12    | 361.1138 | 15.25 |
| 361.1338 | 11.75 | 361.1525 | 15.25 |
| 361.1638 | 9.5   | 361.185  | 19.5  |
| 361.1975 | 10    | 361.22   | 20.5  |
| 361.2325 | 9.5   | 361.2525 | 20.25 |
| 361.2638 | 11.5  | 361.285  | 21    |
| 361.2988 | 7.25  | 361.3175 | 17.75 |
| 361.335  | 10.25 | 361.3525 | 17    |
| 361.3675 | 12.25 | 361.3825 | 17.75 |
| 361.3975 | 10.25 | 361.42   | 20.25 |
| 361.4313 | 11    | 361.45   | 19    |
| 361.4638 | 9.25  | 361.485  | 20.75 |
| 361.5013 | 8.75  | 361.515  | 19.5  |
| 361.5325 | 10    | 361.5488 | 17.5  |
| 361.5663 | 11.25 | 361.5825 | 23    |
| 361.6025 | 8.5   | 361.615  | 19.75 |
| 361.6363 | 7.75  | 361.6525 | 22.5  |
| 361.6663 | 9.5   | 361.685  | 18    |
| 361.6988 | 10    | 361.72   | 18.5  |

|          |       |          |       |
|----------|-------|----------|-------|
| 361.735  | 9.75  | 361.7525 | 19.75 |
| 361.7663 | 11.25 | 361.785  | 17.5  |
| 361.8013 | 11.5  | 361.8175 | 21.5  |
| 361.8375 | 8     | 361.85   | 16.75 |
| 361.8688 | 11.75 | 361.8825 | 19.75 |
| 361.8988 | 9     | 361.92   | 16    |
| 361.9325 | 8.25  | 361.95   | 20    |
| 361.965  | 11.25 | 361.9825 | 15.5  |
| 362.0025 | 12.75 | 362.015  | 18.75 |
| 362.0338 | 11.5  | 362.0488 | 17    |
| 362.0675 | 8.75  | 362.0825 | 17.25 |
| 362.105  | 14.75 | 362.1138 | 15    |
| 362.1363 | 12.75 | 362.1513 | 16    |
| 362.1663 | 13    | 362.185  | 19.25 |
| 362.2    | 11.25 | 362.22   | 19.75 |
| 362.235  | 10.5  | 362.2525 | 14.25 |
| 362.2663 | 11.75 | 362.285  | 16.25 |
| 362.3013 | 12.75 | 362.32   | 18.75 |
| 362.3375 | 9.5   | 362.35   | 15.75 |
| 362.3688 | 11.25 | 362.385  | 18.25 |
| 362.3988 | 9     | 362.42   | 19.25 |
| 362.4325 | 13    | 362.45   | 19    |
| 362.465  | 10.75 | 362.4825 | 20    |
| 362.5025 | 10.25 | 362.515  | 22    |
| 362.5338 | 11.25 | 362.5488 | 16    |
| 362.5675 | 9     | 362.5825 | 20.75 |
| 362.605  | 12.5  | 362.6138 | 18.5  |
| 362.6363 | 12    | 362.6513 | 23.5  |
| 362.6663 | 10.75 | 362.685  | 21.5  |
| 362.7    | 11.75 | 362.72   | 19.75 |
| 362.735  | 10.75 | 362.7525 | 19.75 |
| 362.7663 | 9.75  | 362.785  | 22.75 |
| 362.8013 | 15.25 | 362.8175 | 17.25 |
| 362.8375 | 9.75  | 362.8513 | 22    |
| 362.8688 | 16.25 | 362.8863 | 22.5  |
| 362.8988 | 13.75 | 362.9225 | 22    |
| 362.93   | 11.5  | 362.9525 | 16.25 |
| 362.965  | 14.25 | 362.985  | 16    |
| 363.0025 | 11.25 | 363.0175 | 17    |
| 363.0338 | 11.25 | 363.0513 | 18    |
| 363.0675 | 11.75 | 363.085  | 17.75 |
| 363.105  | 9.5   | 363.1163 | 19.5  |
| 363.1363 | 11.25 | 363.1538 | 12.25 |
| 363.1663 | 9.5   | 363.1888 | 15.75 |
| 363.2    | 10.75 | 363.2225 | 17.5  |
| 363.235  | 12    | 363.2538 | 17.5  |
| 363.2663 | 9     | 363.2888 | 17.75 |
| 363.3025 | 11.25 | 363.3188 | 19    |
| 363.3375 | 13.25 | 363.3513 | 18.25 |
| 363.3688 | 10.25 | 363.3888 | 18    |

|          |       |          |       |
|----------|-------|----------|-------|
| 363.3988 | 10.75 | 363.42   | 17.5  |
| 363.4325 | 15    | 363.4525 | 22.25 |
| 363.465  | 11.75 | 363.485  | 15.5  |
| 363.5025 | 12.5  | 363.5175 | 12.5  |
| 363.5338 | 14    | 363.5513 | 17    |
| 363.565  | 10.75 | 363.585  | 21.25 |
| 363.605  | 14.5  | 363.6163 | 18.75 |
| 363.6363 | 14.25 | 363.6538 | 19    |
| 363.6663 | 15.25 | 363.6863 | 16.5  |
| 363.7    | 11    | 363.7213 | 13.75 |
| 363.735  | 11.5  | 363.7538 | 15    |
| 363.7663 | 9.5   | 363.7888 | 16.5  |
| 363.8013 | 8.75  | 363.8188 | 15.75 |
| 363.835  | 10.5  | 363.8513 | 18.25 |
| 363.8688 | 12.75 | 363.8888 | 17    |
| 363.8988 | 8.25  | 363.92   | 18.75 |
| 363.93   | 11.5  | 363.955  | 15.75 |
| 363.965  | 16.5  | 363.985  | 17    |
| 364.0025 | 14.75 | 364.0175 | 14.75 |
| 364.0338 | 10.25 | 364.0513 | 15    |
| 364.065  | 12.5  | 364.085  | 17.75 |
| 364.105  | 12.25 | 364.1163 | 15    |
| 364.1363 | 14.5  | 364.1538 | 18    |
| 364.1663 | 13.5  | 364.1838 | 18.25 |
| 364.2    | 9.5   | 364.2213 | 14.25 |
| 364.235  | 13.5  | 364.2538 | 14.75 |
| 364.2663 | 12.75 | 364.2888 | 15    |
| 364.3013 | 11.5  | 364.3213 | 17.5  |
| 364.335  | 13.25 | 364.3513 | 18.5  |
| 364.3688 | 15    | 364.3888 | 14    |
| 364.3988 | 15.25 | 364.42   | 14.75 |
| 364.43   | 12.75 | 364.4525 | 14    |
| 364.465  | 17.5  | 364.485  | 14    |
| 364.5025 | 16.5  | 364.5175 | 14.25 |
| 364.5338 | 16.5  | 364.5513 | 16.25 |
| 364.565  | 19.75 | 364.585  | 13.75 |
| 364.605  | 14.5  | 364.6163 | 14    |
| 364.6363 | 16.75 | 364.6538 | 15.25 |
| 364.6663 | 17.75 | 364.6838 | 14    |
| 364.7013 | 17    | 364.7213 | 15.25 |
| 364.735  | 15    | 364.7538 | 17.5  |
| 364.7663 | 18.5  | 364.7888 | 14.5  |
| 364.8013 | 16.5  | 364.8238 | 11.75 |
| 364.835  | 21.75 | 364.8513 | 11.5  |
| 364.8688 | 22    | 364.8888 | 14    |
| 364.8988 | 19.25 | 364.92   | 12.5  |
| 364.93   | 15.5  | 364.9513 | 12.25 |
| 364.965  | 18.25 | 364.985  | 11.75 |
| 365.0025 | 13.5  | 365.0175 | 17    |
| 365.0338 | 14.25 | 365.0513 | 12.25 |

|          |       |          |       |
|----------|-------|----------|-------|
| 365.0663 | 17.75 | 365.085  | 10.75 |
| 365.105  | 15.25 | 365.1163 | 10    |
| 365.1363 | 12.25 | 365.1538 | 15.25 |
| 365.1663 | 13    | 365.1838 | 11    |
| 365.1988 | 20    | 365.2213 | 10    |
| 365.235  | 14.5  | 365.2538 | 14    |
| 365.2663 | 16.75 | 365.2888 | 10    |
| 365.3013 | 14.25 | 365.3213 | 12.5  |
| 365.335  | 19    | 365.3513 | 9.75  |
| 365.3688 | 18    | 365.3888 | 14.25 |
| 365.3988 | 17.5  | 365.42   | 11.5  |
| 365.43   | 15    | 365.4538 | 13.25 |
| 365.465  | 17.25 | 365.485  | 12.25 |
| 365.5025 | 17.25 | 365.5175 | 13.25 |
| 365.535  | 16.25 | 365.5513 | 14.25 |
| 365.565  | 16    | 365.5875 | 12.75 |
| 365.605  | 17.75 | 365.6163 | 11.5  |
| 365.6363 | 15.75 | 365.6538 | 16    |
| 365.6663 | 13.5  | 365.6838 | 13.5  |
| 365.6988 | 14.5  | 365.7213 | 17.5  |
| 365.735  | 16    | 365.7538 | 16.25 |
| 365.7663 | 12.75 | 365.7888 | 13    |
| 365.8013 | 10.25 | 365.8213 | 16.25 |
| 365.8338 | 10.75 | 365.8513 | 15.25 |
| 365.8688 | 11.75 | 365.8888 | 12.75 |
| 365.8988 | 9.75  | 365.92   | 17.75 |
| 365.93   | 8.5   | 365.9538 | 13.75 |
| 365.965  | 11    | 365.985  | 13.25 |
| 366.0025 | 11.75 | 366.0175 | 15.75 |
| 366.035  | 10.5  | 366.0513 | 16.5  |
| 366.065  | 13.75 | 366.085  | 16.5  |
| 366.105  | 9.75  | 366.1163 | 15.75 |
| 366.1363 | 14    | 366.1538 | 12.25 |
| 366.1663 | 7.75  | 366.1838 | 11    |
| 366.1988 | 12    | 366.2188 | 15    |
| 366.2325 | 17.75 | 366.2538 | 15.5  |
| 366.2663 | 12.75 | 366.2888 | 15.5  |
| 366.3013 | 12    | 366.3213 | 13.5  |
| 366.3363 | 15.5  | 366.3513 | 11.25 |
| 366.3688 | 16    | 366.3888 | 10.75 |
| 366.3988 | 11.75 | 366.42   | 14    |
| 366.43   | 11.5  | 366.4538 | 10.25 |
| 366.465  | 14.5  | 366.485  | 13.5  |
| 366.5025 | 10.25 | 366.5175 | 16    |
| 366.535  | 9.75  | 366.5513 | 14    |
| 366.565  | 8.5   | 366.585  | 13    |
| 366.605  | 12    | 366.62   | 15.25 |
| 366.6363 | 7.5   | 366.6538 | 17    |
| 366.6663 | 14.25 | 366.6838 | 14.5  |
| 366.6988 | 14.25 | 366.7188 | 17    |

|          |       |          |       |
|----------|-------|----------|-------|
| 366.7325 | 11.75 | 366.7538 | 13.25 |
| 366.7663 | 8.5   | 366.7888 | 16.5  |
| 366.8013 | 17    | 366.8213 | 14.75 |
| 366.8338 | 14.25 | 366.8513 | 16.75 |
| 366.87   | 13    | 366.8888 | 15.25 |
| 366.9013 | 13.5  | 366.92   | 18.5  |
| 366.93   | 15.5  | 366.9538 | 21.5  |
| 366.965  | 12.75 | 366.9838 | 15.5  |
| 367.0025 | 10.75 | 367.0175 | 17.25 |
| 367.035  | 12.25 | 367.0538 | 18.5  |
| 367.065  | 14.75 | 367.085  | 21.25 |
| 367.105  | 15.5  | 367.1188 | 17.75 |
| 367.1363 | 12.5  | 367.1538 | 20.25 |
| 367.1663 | 11.75 | 367.1838 | 18.5  |
| 367.1988 | 13.5  | 367.2188 | 14    |
| 367.2325 | 14.25 | 367.2525 | 16.5  |
| 367.2663 | 15.5  | 367.2888 | 17.25 |
| 367.3013 | 14.25 | 367.3213 | 15.75 |
| 367.3338 | 16    | 367.3513 | 21    |
| 367.3688 | 16.5  | 367.3888 | 14.75 |
| 367.3988 | 15.75 | 367.42   | 18.5  |
| 367.43   | 13.5  | 367.4538 | 16    |
| 367.465  | 16.75 | 367.4863 | 14.5  |
| 367.5025 | 17.75 | 367.5175 | 18.5  |
| 367.535  | 14.5  | 367.5538 | 16.25 |
| 367.565  | 19    | 367.585  | 15    |
| 367.6025 | 21.75 | 367.6188 | 16.75 |
| 367.6363 | 15.25 | 367.6538 | 16    |
| 367.6663 | 17.5  | 367.6838 | 18.5  |
| 367.6988 | 15.25 | 367.7188 | 16.75 |
| 367.7325 | 16.75 | 367.75   | 19    |
| 367.7663 | 15.5  | 367.7888 | 19.5  |
| 367.8013 | 17    | 367.8213 | 14.5  |
| 367.8338 | 13    | 367.8513 | 16.75 |
| 367.8688 | 15.75 | 367.8888 | 15.75 |
| 367.8988 | 16.5  | 367.92   | 17.25 |
| 367.93   | 13.25 | 367.9538 | 16.25 |
| 367.9625 | 15.25 | 367.985  | 15.75 |
| 368.0025 | 16.75 | 368.0175 | 16    |
| 368.035  | 13.75 | 368.0538 | 14.75 |
| 368.065  | 16.75 | 368.085  | 15.25 |
| 368.1025 | 14.25 | 368.1188 | 17.5  |
| 368.1363 | 11.5  | 368.1538 | 21.5  |
| 368.1663 | 13.5  | 368.1838 | 17.75 |
| 368.1988 | 11.5  | 368.2188 | 18    |
| 368.2325 | 14.75 | 368.25   | 17.25 |
| 368.2663 | 13.5  | 368.2888 | 17.5  |
| 368.3013 | 12.25 | 368.3213 | 16    |
| 368.3338 | 11.25 | 368.3513 | 14.5  |
| 368.3688 | 14.75 | 368.3888 | 15.5  |

|          |       |          |       |
|----------|-------|----------|-------|
| 368.3988 | 14    | 368.42   | 18.25 |
| 368.43   | 15.5  | 368.4538 | 17    |
| 368.4625 | 13.5  | 368.4838 | 18.5  |
| 368.5025 | 16    | 368.5175 | 17    |
| 368.535  | 11.75 | 368.5563 | 18.5  |
| 368.565  | 16    | 368.585  | 17    |
| 368.6025 | 12.25 | 368.6188 | 17.75 |
| 368.6363 | 13.25 | 368.6538 | 17.75 |
| 368.6688 | 16.5  | 368.6838 | 17.25 |
| 368.7013 | 11.5  | 368.7188 | 19.25 |
| 368.7325 | 10.75 | 368.75   | 17    |
| 368.7663 | 14.25 | 368.7875 | 20.5  |
| 368.8013 | 15.25 | 368.8213 | 18.25 |
| 368.8338 | 11.5  | 368.8513 | 19.75 |
| 368.8688 | 11.25 | 368.8888 | 19.5  |
| 368.8988 | 10.25 | 368.92   | 11.75 |
| 368.93   | 9.5   | 368.9538 | 16    |
| 368.9625 | 16    | 368.9838 | 16    |
| 369.0025 | 10.5  | 369.0163 | 18.75 |
| 369.035  | 12    | 369.0538 | 15.75 |
| 369.065  | 15    | 369.085  | 16    |
| 369.1025 | 14.75 | 369.1188 | 13.75 |
| 369.1375 | 11.75 | 369.1538 | 17.75 |
| 369.1663 | 16    | 369.185  | 18    |
| 369.1988 | 11.5  | 369.2188 | 16.5  |
| 369.2325 | 11.75 | 369.25   | 17.25 |
| 369.2663 | 14.25 | 369.2875 | 15.5  |
| 369.3013 | 13    | 369.3225 | 19.5  |
| 369.3313 | 13.75 | 369.3513 | 18.25 |
| 369.3675 | 13.25 | 369.3888 | 18.25 |
| 369.3988 | 11    | 369.42   | 17.25 |
| 369.43   | 13.75 | 369.4538 | 19.5  |
| 369.4625 | 11.75 | 369.4838 | 16.25 |
| 369.5013 | 9.75  | 369.5163 | 17.25 |
| 369.535  | 10.25 | 369.5538 | 16.75 |
| 369.565  | 13    | 369.585  | 14.25 |
| 369.6025 | 14.75 | 369.6188 | 14.75 |
| 369.6363 | 13.25 | 369.6538 | 13.25 |
| 369.6663 | 13.75 | 369.685  | 15.5  |
| 369.6988 | 14.75 | 369.7188 | 16    |
| 369.7325 | 12.75 | 369.75   | 18.75 |
| 369.7663 | 13.25 | 369.79   | 19.5  |
| 369.8013 | 15.75 | 369.8213 | 17.25 |
| 369.8313 | 14.5  | 369.8513 | 16.75 |
| 369.8675 | 17    | 369.8888 | 18.5  |
| 369.8988 | 11.5  | 369.92   | 21.5  |
| 369.93   | 14.25 | 369.9538 | 18    |
| 369.9625 | 13.5  | 369.9838 | 16.25 |
| 370.0013 | 15    | 370.0163 | 14.75 |
| 370.035  | 12.5  | 370.0538 | 19.75 |

|          |       |          |       |
|----------|-------|----------|-------|
| 370.065  | 13.25 | 370.085  | 16.5  |
| 370.1025 | 11.75 | 370.1188 | 17    |
| 370.1363 | 12.25 | 370.1538 | 21    |
| 370.1663 | 12    | 370.185  | 14.75 |
| 370.1988 | 14.75 | 370.2188 | 19.5  |
| 370.2325 | 13.5  | 370.25   | 16.25 |
| 370.2663 | 10    | 370.2863 | 18.75 |
| 370.3013 | 14.75 | 370.3213 | 17.25 |
| 370.3313 | 12.75 | 370.3513 | 13.75 |
| 370.3675 | 12.25 | 370.3888 | 16    |
| 370.3988 | 13.75 | 370.42   | 17    |
| 370.43   | 11.5  | 370.4538 | 16.5  |
| 370.4625 | 14    | 370.4838 | 14    |
| 370.5013 | 10.25 | 370.5138 | 13.5  |
| 370.535  | 12.25 | 370.5538 | 15.75 |
| 370.565  | 12.75 | 370.585  | 13.75 |
| 370.6025 | 8.25  | 370.6188 | 12.25 |
| 370.6363 | 10    | 370.6538 | 14.25 |
| 370.6663 | 12.25 | 370.685  | 15    |
| 370.6988 | 10.75 | 370.7188 | 14    |
| 370.7325 | 11.5  | 370.75   | 15.5  |
| 370.7663 | 10.75 | 370.7863 | 14    |
| 370.8013 | 11.5  | 370.8213 | 14    |
| 370.8313 | 10    | 370.8513 | 15.5  |
| 370.8675 | 15    | 370.8888 | 14.25 |
| 370.8988 | 12.5  | 370.92   | 16.75 |
| 370.93   | 15.25 | 370.9538 | 14    |
| 370.9625 | 14.25 | 370.9838 | 13.25 |
| 371.0013 | 11.5  | 371.0138 | 15.5  |
| 371.035  | 16.25 | 371.0538 | 17    |
| 371.065  | 15    | 371.085  | 12.25 |
| 371.1025 | 14    | 371.1188 | 12.25 |
| 371.1338 | 11.75 | 371.1538 | 10.25 |
| 371.1663 | 13.25 | 371.185  | 11    |
| 371.1988 | 12    | 371.2188 | 10.75 |
| 371.2325 | 9.5   | 371.25   | 9.75  |
| 371.2663 | 11.75 | 371.2863 | 10.5  |
| 371.3013 | 11.5  | 371.3213 | 9.25  |
| 371.3313 | 12.25 | 371.3513 | 11.25 |
| 371.3675 | 12.75 | 371.3888 | 11    |
| 371.3988 | 8     | 371.42   | 12    |
| 371.4325 | 8.5   | 371.4538 | 16.5  |
| 371.4625 | 9.25  | 371.4838 | 11    |
| 371.5013 | 6.5   | 371.5138 | 14.75 |
| 371.535  | 9.5   | 371.5538 | 13.25 |
| 371.565  | 10    | 371.585  | 12.25 |
| 371.6025 | 11.75 | 371.6188 | 12.25 |
| 371.6338 | 11.25 | 371.6538 | 15.25 |
| 371.6663 | 11    | 371.685  | 13.75 |
| 371.6988 | 10.5  | 371.7188 | 17.5  |

|          |       |          |       |
|----------|-------|----------|-------|
| 371.7325 | 11.75 | 371.7513 | 12.75 |
| 371.7663 | 11.75 | 371.7863 | 14.25 |
| 371.8013 | 9.5   | 371.8213 | 16.75 |
| 371.8338 | 7.75  | 371.8513 | 10.25 |
| 371.8675 | 9.5   | 371.8888 | 15    |
| 371.8988 | 11.25 | 371.92   | 16.25 |
| 371.9325 | 10.25 | 371.9538 | 14.75 |
| 371.9625 | 11.25 | 371.9838 | 15.25 |
| 372.0013 | 12.5  | 372.0163 | 16.5  |
| 372.035  | 14    | 372.0513 | 11.5  |
| 372.065  | 10    | 372.085  | 11.75 |
| 372.1025 | 9     | 372.1188 | 13    |
| 372.135  | 12    | 372.1538 | 19    |
| 372.1663 | 11.5  | 372.185  | 15.25 |
| 372.1988 | 10.75 | 372.2188 | 18.75 |
| 372.2325 | 11.5  | 372.25   | 18    |
| 372.2638 | 10.5  | 372.2863 | 15    |
| 372.3013 | 10.75 | 372.3213 | 21    |
| 372.3338 | 13.5  | 372.3513 | 16    |
| 372.3675 | 12.5  | 372.3888 | 15.75 |
| 372.3975 | 8     | 372.4225 | 17.25 |
| 372.4325 | 9.25  | 372.4538 | 15.5  |
| 372.465  | 8.5   | 372.4838 | 19    |
| 372.5013 | 8     | 372.5163 | 16.5  |
| 372.535  | 8     | 372.5513 | 13.5  |
| 372.565  | 10    | 372.585  | 17.25 |
| 372.6038 | 12    | 372.6188 | 14.75 |
| 372.635  | 7.75  | 372.6538 | 13.25 |
| 372.6675 | 7.75  | 372.685  | 14.5  |
| 372.7    | 9.5   | 372.7188 | 15.75 |
| 372.7338 | 7     | 372.75   | 10.75 |
| 372.765  | 8     | 372.7863 | 13.5  |
| 372.8025 | 7.75  | 372.8213 | 13.25 |
| 372.8363 | 9.25  | 372.8513 | 15.25 |
| 372.87   | 7     | 372.8888 | 13    |
| 372.9    | 6.5   | 372.9225 | 12.5  |
| 372.935  | 8.75  | 372.9538 | 11    |
| 372.9675 | 8.75  | 372.9838 | 11.25 |
| 373.0038 | 10.75 | 373.0163 | 19.5  |
| 373.0375 | 8.75  | 373.0513 | 15.25 |
| 373.0675 | 9.5   | 373.085  | 15.75 |
| 373.1038 | 6.5   | 373.1188 | 15.75 |
| 373.135  | 12    | 373.1538 | 15.25 |
| 373.1675 | 9.25  | 373.185  | 14    |
| 373.2    | 11.5  | 373.2188 | 17.25 |
| 373.2338 | 11.75 | 373.25   | 17    |
| 373.265  | 13    | 373.2863 | 18    |
| 373.3025 | 12.5  | 373.3213 | 19.25 |
| 373.3363 | 9.75  | 373.3513 | 17.5  |
| 373.37   | 11.5  | 373.3888 | 18    |



|          |       |          |       |
|----------|-------|----------|-------|
| 373.4    | 9.25  | 373.4225 | 16.25 |
| 373.435  | 11.75 | 373.4538 | 17    |
| 373.4675 | 9.75  | 373.4838 | 19    |
| 373.5038 | 13.75 | 373.5163 | 18    |
| 373.5375 | 11.5  | 373.5513 | 16.75 |
| 373.5675 | 12    | 373.585  | 18.5  |
| 373.6038 | 10.75 | 373.6188 | 20.75 |
| 373.635  | 11.5  | 373.6538 | 19    |
| 373.665  | 13    | 373.685  | 17.75 |
| 373.7    | 13.25 | 373.7188 | 15.25 |
| 373.7338 | 10.5  | 373.75   | 16    |
| 373.765  | 10    | 373.7863 | 15.5  |
| 373.8025 | 14.75 | 373.8213 | 17.75 |
| 373.8363 | 10.5  | 373.8513 | 13.75 |
| 373.87   | 9.75  | 373.8888 | 18.5  |
| 373.9    | 9.75  | 373.9225 | 15.5  |
| 373.935  | 10.5  | 373.9538 | 15.75 |
| 373.9675 | 8.25  | 373.9838 | 17.25 |
| 374.0038 | 8     | 374.0163 | 17.75 |
| 374.0375 | 8.75  | 374.0513 | 18.75 |
| 374.0675 | 9.25  | 374.085  | 17    |
| 374.1038 | 10.5  | 374.1188 | 14.5  |
| 374.135  | 9.5   | 374.1538 | 13    |
| 374.165  | 6.75  | 374.185  | 13    |
| 374.2    | 6.25  | 374.2188 | 15    |
| 374.2338 | 7.75  | 374.25   | 13    |
| 374.27   | 7.75  | 374.2863 | 14    |
| 374.3025 | 13.25 | 374.32   | 13.5  |
| 374.3363 | 9.5   | 374.3513 | 13.75 |
| 374.37   | 9     | 374.3888 | 14.75 |
| 374.4    | 10    | 374.4225 | 13.75 |
| 374.435  | 8.5   | 374.4538 | 18    |
| 374.4675 | 8.5   | 374.4838 | 14.25 |
| 374.5038 | 9.25  | 374.5163 | 13.75 |
| 374.5363 | 9.5   | 374.5513 | 16.25 |
| 374.5688 | 8     | 374.585  | 11    |
| 374.6038 | 11    | 374.6188 | 13.75 |
| 374.635  | 8.75  | 374.6538 | 11.5  |
| 374.665  | 7.5   | 374.685  | 9.75  |
| 374.7    | 9.5   | 374.7188 | 13.5  |
| 374.7338 | 11.25 | 374.75   | 9.75  |
| 374.765  | 10.25 | 374.7838 | 14.25 |
| 374.8025 | 8.5   | 374.82   | 11.25 |
| 374.8363 | 7.75  | 374.8538 | 14.25 |
| 374.87   | 7.75  | 374.8888 | 11.75 |
| 374.9    | 10    | 374.9225 | 14.75 |
| 374.9325 | 10    | 374.9538 | 14.5  |
| 374.965  | 10    | 374.9838 | 18    |
| 375.005  | 8.5   | 375.0163 | 12.5  |
| 375.0363 | 7.75  | 375.0513 | 13.25 |

|          |       |          |       |
|----------|-------|----------|-------|
| 375.0688 | 9.75  | 375.085  | 11.75 |
| 375.1013 | 6.75  | 375.1213 | 15.5  |
| 375.135  | 13    | 375.1538 | 14.5  |
| 375.165  | 9.25  | 375.185  | 14    |
| 375.2    | 9.25  | 375.2188 | 17.75 |
| 375.2338 | 8.5   | 375.2513 | 16.5  |
| 375.265  | 10.75 | 375.2838 | 16    |
| 375.3025 | 8.25  | 375.32   | 14    |
| 375.3363 | 9.25  | 375.3525 | 14.5  |
| 375.37   | 7.75  | 375.3888 | 18.25 |
| 375.4    | 9.75  | 375.4225 | 15.75 |
| 375.4325 | 8.25  | 375.4538 | 17    |
| 375.4675 | 8.5   | 375.4838 | 16    |
| 375.5038 | 8.25  | 375.5163 | 16    |
| 375.5363 | 8.25  | 375.5488 | 18.25 |
| 375.5688 | 6.75  | 375.585  | 11.5  |
| 375.6013 | 7.75  | 375.6213 | 15.5  |
| 375.635  | 5.75  | 375.6538 | 19    |
| 375.665  | 8.5   | 375.685  | 11.75 |
| 375.7    | 9     | 375.7188 | 15.5  |
| 375.735  | 6.75  | 375.7513 | 13.75 |
| 375.765  | 10    | 375.7838 | 13    |
| 375.8025 | 7.5   | 375.82   | 17.75 |
| 375.8363 | 6.5   | 375.8525 | 18    |
| 375.87   | 5.5   | 375.8888 | 16.25 |
| 375.9    | 6     | 375.9225 | 13    |
| 375.9325 | 6.5   | 375.9538 | 20    |
| 375.965  | 7.75  | 375.9838 | 15    |
| 376.0038 | 8.25  | 376.0188 | 16.25 |
| 376.0363 | 5.75  | 376.0488 | 11.75 |
| 376.0713 | 6.5   | 376.085  | 13.75 |
| 376.1013 | 8     | 376.1213 | 15    |
| 376.135  | 7.75  | 376.155  | 15.75 |
| 376.1675 | 9.5   | 376.185  | 15.5  |
| 376.2    | 7     | 376.2188 | 16    |
| 376.235  | 9.5   | 376.2513 | 18.5  |
| 376.265  | 9     | 376.2838 | 19    |
| 376.3025 | 7.25  | 376.32   | 15    |
| 376.3363 | 8.75  | 376.3525 | 19.75 |
| 376.37   | 8.5   | 376.3888 | 17.75 |
| 376.4    | 10.25 | 376.4225 | 17    |
| 376.4325 | 10.25 | 376.4538 | 19.25 |
| 376.465  | 9.5   | 376.4838 | 14    |
| 376.5038 | 7.25  | 376.5163 | 16.5  |
| 376.5363 | 12.5  | 376.5488 | 20.5  |
| 376.5688 | 8.25  | 376.585  | 19    |
| 376.6013 | 11    | 376.6213 | 16.25 |
| 376.635  | 8.75  | 376.655  | 18.25 |
| 376.6675 | 9.5   | 376.685  | 16.5  |
| 376.6988 | 9.75  | 376.7188 | 19    |

|          |       |          |       |
|----------|-------|----------|-------|
| 376.735  | 10.5  | 376.7513 | 20    |
| 376.765  | 9.75  | 376.7838 | 19.25 |
| 376.805  | 8.5   | 376.82   | 14.5  |
| 376.8363 | 9.25  | 376.8525 | 17.5  |
| 376.87   | 8     | 376.8888 | 13.75 |
| 376.9    | 9.75  | 376.9225 | 18    |
| 376.9325 | 11    | 376.9538 | 16.25 |
| 376.9675 | 8.75  | 376.9838 | 15.5  |
| 377.0038 | 10.25 | 377.0163 | 14.5  |
| 377.0363 | 12.75 | 377.0488 | 17    |
| 377.0688 | 11.25 | 377.085  | 14.5  |
| 377.1013 | 11    | 377.1213 | 13    |
| 377.135  | 11    | 377.155  | 13    |
| 377.1675 | 9     | 377.185  | 14.75 |
| 377.1988 | 9     | 377.2188 | 11.25 |
| 377.235  | 10    | 377.2538 | 17.5  |
| 377.2675 | 10.25 | 377.285  | 18.75 |
| 377.3063 | 8.25  | 377.3213 | 16.25 |
| 377.3388 | 7.75  | 377.3538 | 19    |
| 377.3725 | 8     | 377.3925 | 15    |
| 377.4025 | 9.75  | 377.4238 | 13    |
| 377.435  | 9.75  | 377.455  | 13.5  |
| 377.47   | 8.5   | 377.485  | 14.25 |
| 377.505  | 8.25  | 377.5188 | 13.25 |
| 377.54   | 7     | 377.55   | 19.5  |
| 377.5713 | 8     | 377.585  | 14.75 |
| 377.6025 | 10.75 | 377.6238 | 14.25 |
| 377.6363 | 12.75 | 377.6575 | 12.5  |
| 377.6688 | 7.5   | 377.6875 | 11.5  |
| 377.7    | 9     | 377.7213 | 17.75 |
| 377.7375 | 9     | 377.7538 | 12    |
| 377.7675 | 10    | 377.785  | 14.25 |
| 377.8063 | 8.25  | 377.8213 | 16    |
| 377.8388 | 6     | 377.8538 | 13    |
| 377.8725 | 8     | 377.8925 | 11.25 |
| 377.9025 | 7.25  | 377.9238 | 14    |
| 377.935  | 9.25  | 377.955  | 17    |
| 377.9675 | 12.5  | 377.985  | 13    |
| 378.0063 | 8.5   | 378.0188 | 14    |
| 378.0375 | 8     | 378.05   | 13    |
| 378.0713 | 11.75 | 378.085  | 16.75 |
| 378.1025 | 12.25 | 378.1238 | 15    |
| 378.1363 | 9.5   | 378.1575 | 16.25 |
| 378.1688 | 11    | 378.1875 | 15    |
| 378.2    | 12    | 378.2213 | 15    |
| 378.2375 | 7     | 378.2538 | 11.5  |
| 378.2675 | 7.25  | 378.285  | 13.25 |
| 378.3063 | 8.5   | 378.3213 | 17.5  |
| 378.3388 | 8.75  | 378.3538 | 14.5  |
| 378.3725 | 8.75  | 378.3925 | 15.5  |

|          |       |          |       |
|----------|-------|----------|-------|
| 378.4025 | 9.25  | 378.4238 | 14.5  |
| 378.435  | 8.25  | 378.455  | 13    |
| 378.47   | 10.5  | 378.4863 | 16.25 |
| 378.505  | 9.75  | 378.5213 | 13    |
| 378.5375 | 9     | 378.555  | 15.75 |
| 378.5713 | 12.25 | 378.5863 | 17.25 |
| 378.6025 | 13    | 378.625  | 17.75 |
| 378.6363 | 9.75  | 378.66   | 13.25 |
| 378.6688 | 10    | 378.69   | 14.75 |
| 378.7    | 9.75  | 378.7238 | 18.25 |
| 378.74   | 12.25 | 378.7563 | 19.75 |
| 378.7675 | 10    | 378.7863 | 19.75 |
| 378.8063 | 11    | 378.8238 | 20.25 |
| 378.8388 | 15.75 | 378.8563 | 20.75 |
| 378.8725 | 9.75  | 378.895  | 18    |
| 378.9038 | 10    | 378.925  | 16.25 |
| 378.935  | 11.75 | 378.9563 | 15    |
| 378.9675 | 11.25 | 378.9863 | 17    |
| 379.005  | 12    | 379.0213 | 17.5  |
| 379.0388 | 12    | 379.0538 | 15.5  |
| 379.0713 | 12.5  | 379.0863 | 17.75 |
| 379.1025 | 9.5   | 379.125  | 12    |
| 379.1363 | 12.5  | 379.16   | 13.25 |
| 379.1688 | 11.75 | 379.19   | 14.25 |
| 379.2    | 12    | 379.2238 | 14.25 |
| 379.2375 | 13.75 | 379.2563 | 15    |
| 379.2675 | 12.5  | 379.2863 | 16.75 |
| 379.3063 | 13.25 | 379.3238 | 15.25 |
| 379.3388 | 10.75 | 379.3588 | 15    |
| 379.3725 | 11.5  | 379.395  | 14.25 |
| 379.4038 | 10.75 | 379.425  | 19.5  |
| 379.435  | 8.25  | 379.4563 | 17.25 |
| 379.4675 | 10.75 | 379.4863 | 17.5  |
| 379.505  | 11.25 | 379.5213 | 21.25 |
| 379.5388 | 9.75  | 379.5538 | 20.5  |
| 379.5713 | 9.25  | 379.5863 | 22.5  |
| 379.6025 | 9     | 379.625  | 19.25 |
| 379.6363 | 9.75  | 379.66   | 20    |
| 379.6688 | 8.25  | 379.69   | 15.75 |
| 379.7    | 7.75  | 379.7238 | 14    |
| 379.7363 | 10.5  | 379.7563 | 17    |
| 379.7675 | 8.5   | 379.7863 | 14.75 |
| 379.8075 | 9.25  | 379.8238 | 17.5  |
| 379.8388 | 10    | 379.8588 | 14.25 |
| 379.8725 | 12.5  | 379.895  | 17.5  |
| 379.9038 | 9.25  | 379.925  | 13.75 |
| 379.935  | 10.5  | 379.9563 | 15    |
| 379.9675 | 8.5   | 379.9863 | 14.75 |
| 380.005  | 9.5   | 380.0213 | 14.75 |
| 380.0388 | 10.25 | 380.0525 | 13.25 |

|          |       |
|----------|-------|
| 380.0713 | 11    |
| 380.1025 | 10    |
| 380.1363 | 9     |
| 380.1688 | 8.25  |
| 380.2    | 12.5  |
| 380.2363 | 12.25 |
| 380.2675 | 11.75 |
| 380.3063 | 11.75 |
| 380.3388 | 9.5   |
| 380.3725 | 11    |
| 380.4038 | 13.25 |
| 380.435  | 10.5  |
| 380.47   | 7.25  |
| 380.505  | 10.25 |
| 380.5388 | 10.25 |
| 380.5713 | 10.25 |
| 380.6025 | 9.25  |
| 380.6363 | 8.25  |
| 380.6688 | 10    |
| 380.7    | 10.5  |
| 380.7363 | 11    |
| 380.77   | 10.5  |
| 380.8063 | 10    |
| 380.8388 | 10.25 |
| 380.8725 | 9.25  |
| 380.9038 | 9.25  |
| 380.935  | 10.5  |
| 380.97   | 12    |
| 381.005  | 14    |
| 381.0388 | 10.75 |
| 381.0713 | 8.25  |
| 381.1025 | 9.5   |
| 381.1388 | 5.75  |
| 381.1688 | 8     |
| 381.2    | 7.5   |
| 381.2363 | 9.5   |
| 381.27   | 8.5   |
| 381.3063 | 7.5   |
| 381.3388 | 7     |
| 381.3713 | 10.75 |
| 381.4038 | 14.25 |
| 381.4375 | 9.75  |
| 381.47   | 10    |
| 381.505  | 13    |
| 381.5388 | 9     |
| 381.5713 | 10    |
| 381.6025 | 11.5  |
| 381.6388 | 6.75  |
| 381.6688 | 8.25  |
| 381.7    | 8.5   |

|          |       |
|----------|-------|
| 380.0863 | 20.25 |
| 380.125  | 18    |
| 380.16   | 13.75 |
| 380.19   | 15.75 |
| 380.2238 | 17.75 |
| 380.2563 | 13    |
| 380.2863 | 12.75 |
| 380.3213 | 18    |
| 380.3613 | 19    |
| 380.395  | 15.5  |
| 380.425  | 15    |
| 380.4563 | 18.75 |
| 380.4863 | 15.25 |
| 380.5213 | 13.5  |
| 380.5525 | 16.25 |
| 380.5863 | 16.25 |
| 380.625  | 16.75 |
| 380.66   | 15    |
| 380.69   | 13.5  |
| 380.7238 | 12.5  |
| 380.7563 | 12.5  |
| 380.7863 | 13    |
| 380.8213 | 13.75 |
| 380.8613 | 18    |
| 380.895  | 19    |
| 380.925  | 15.5  |
| 380.9563 | 12    |
| 380.9863 | 13.75 |
| 381.0213 | 17.25 |
| 381.0525 | 17    |
| 381.0863 | 17.5  |
| 381.125  | 22.75 |
| 381.16   | 19    |
| 381.19   | 17    |
| 381.2238 | 14.5  |
| 381.2563 | 13.75 |
| 381.2863 | 16    |
| 381.3213 | 17.5  |
| 381.36   | 13.5  |
| 381.395  | 11.75 |
| 381.425  | 14.25 |
| 381.4563 | 16    |
| 381.4863 | 11    |
| 381.5225 | 10.25 |
| 381.5525 | 13    |
| 381.5863 | 16    |
| 381.625  | 11.25 |
| 381.66   | 9.25  |
| 381.69   | 8     |
| 381.7238 | 12.25 |

|          |       |
|----------|-------|
| 381.7363 | 9     |
| 381.77   | 9.5   |
| 381.8063 | 10.25 |
| 381.8388 | 9.75  |
| 381.8713 | 8.25  |
| 381.9038 | 11    |
| 381.935  | 7.25  |
| 381.97   | 10.25 |
| 382.0025 | 11.25 |
| 382.0388 | 11.5  |
| 382.0713 | 11    |
| 382.1025 | 12    |
| 382.1388 | 8.5   |
| 382.1688 | 8.5   |
| 382.2    | 8.25  |
| 382.2363 | 9     |
| 382.27   | 9.75  |
| 382.305  | 8     |
| 382.3388 | 11.75 |
| 382.3713 | 8     |
| 382.4038 | 9.5   |
| 382.435  | 11.25 |
| 382.47   | 5.75  |
| 382.5038 | 9.25  |
| 382.5388 | 5.75  |
| 382.5713 | 6     |
| 382.6025 | 7.75  |
| 382.6388 | 8.5   |
| 382.6688 | 14    |
| 382.7    | 12.5  |
| 382.7363 | 15.5  |
| 382.77   | 12.75 |
| 382.805  | 13.5  |
| 382.8388 | 12.5  |
| 382.8725 | 12.25 |
| 382.9038 | 12.75 |
| 382.935  | 12.25 |
| 382.97   | 12.75 |
| 383.0038 | 9.25  |
| 383.0388 | 12.75 |
| 383.0713 | 12.25 |
| 383.1025 | 12.25 |
| 383.1388 | 9.75  |
| 383.1688 | 12.5  |
| 383.2    | 14    |
| 383.2363 | 12.75 |
| 383.27   | 13    |
| 383.305  | 15.75 |
| 383.3388 | 17.5  |
| 383.3725 | 12    |

|          |       |
|----------|-------|
| 381.7563 | 11    |
| 381.7863 | 8.75  |
| 381.8213 | 10.25 |
| 381.86   | 11.5  |
| 381.895  | 10.75 |
| 381.925  | 11.25 |
| 381.9563 | 8.5   |
| 381.9888 | 8.5   |
| 382.0213 | 8     |
| 382.0525 | 11.25 |
| 382.0863 | 10.5  |
| 382.125  | 10    |
| 382.16   | 11.5  |
| 382.19   | 11.5  |
| 382.2238 | 14.5  |
| 382.2563 | 13.25 |
| 382.2863 | 10    |
| 382.3213 | 16.25 |
| 382.36   | 8.5   |
| 382.395  | 11.75 |
| 382.425  | 13.5  |
| 382.4563 | 15.75 |
| 382.4888 | 11    |
| 382.5213 | 11.75 |
| 382.5525 | 10.25 |
| 382.5875 | 12    |
| 382.625  | 9.5   |
| 382.66   | 11    |
| 382.69   | 13    |
| 382.7238 | 9     |
| 382.7563 | 17.75 |
| 382.7863 | 11.75 |
| 382.8213 | 15.75 |
| 382.86   | 15    |
| 382.895  | 14.75 |
| 382.925  | 10.75 |
| 382.9563 | 14.75 |
| 382.9888 | 17    |
| 383.0213 | 17    |
| 383.0525 | 12.75 |
| 383.0875 | 14    |
| 383.125  | 15.75 |
| 383.16   | 15.25 |
| 383.19   | 12.75 |
| 383.2238 | 11    |
| 383.2563 | 17    |
| 383.2863 | 13.25 |
| 383.3213 | 15.5  |
| 383.36   | 18.75 |
| 383.395  | 14    |

|          |       |          |       |
|----------|-------|----------|-------|
| 383.4038 | 15.5  | 383.425  | 13    |
| 383.435  | 12    | 383.4563 | 13.25 |
| 383.4725 | 15.25 | 383.4888 | 14    |
| 383.5063 | 12.25 | 383.5213 | 16.75 |
| 383.5413 | 12.25 | 383.5525 | 14.25 |
| 383.5738 | 11.75 | 383.5888 | 13.75 |
| 383.6038 | 11.25 | 383.625  | 14    |
| 383.64   | 12    | 383.66   | 14    |
| 383.67   | 10.75 | 383.69   | 13.5  |
| 383.7013 | 12    | 383.7238 | 17.75 |
| 383.74   | 11.25 | 383.7563 | 18.5  |
| 383.7713 | 10.75 | 383.7863 | 17.5  |
| 383.8063 | 13.25 | 383.8213 | 16    |
| 383.8413 | 9     | 383.86   | 17.25 |
| 383.875  | 14.5  | 383.895  | 20.25 |
| 383.9063 | 12.25 | 383.925  | 14    |
| 383.9375 | 14    | 383.9563 | 13    |
| 383.9725 | 12.75 | 383.99   | 16.5  |
| 384.0063 | 12.25 | 384.0213 | 20.25 |
| 384.0413 | 12.5  | 384.0525 | 19    |
| 384.0738 | 10    | 384.0888 | 18.25 |
| 384.1038 | 11.25 | 384.125  | 20.5  |
| 384.14   | 9.75  | 384.16   | 21.75 |
| 384.17   | 11.75 | 384.19   | 23.5  |
| 384.2013 | 13.75 | 384.2238 | 14.25 |
| 384.24   | 8     | 384.2563 | 17    |
| 384.2738 | 11.25 | 384.2863 | 15.75 |
| 384.3063 | 11.75 | 384.3188 | 15.25 |
| 384.3413 | 10    | 384.3575 | 17.5  |
| 384.375  | 12.5  | 384.395  | 14.75 |
| 384.4063 | 11.25 | 384.425  | 17.25 |
| 384.4375 | 12.5  | 384.4563 | 16.5  |
| 384.475  | 10.5  | 384.4888 | 15.75 |
| 384.5075 | 11.75 | 384.5213 | 16.75 |
| 384.5413 | 8.25  | 384.5525 | 14.5  |
| 384.5738 | 10.75 | 384.5888 | 16.5  |
| 384.6063 | 7.5   | 384.625  | 14.25 |
| 384.64   | 9     | 384.66   | 17.5  |
| 384.67   | 13.25 | 384.69   | 15.5  |
| 384.7013 | 9.5   | 384.7238 | 14.5  |
| 384.74   | 9     | 384.7563 | 19.75 |
| 384.7738 | 13    | 384.7863 | 13.5  |
| 384.8063 | 11    | 384.8188 | 13.5  |
| 384.8413 | 9.25  | 384.8575 | 15    |
| 384.8763 | 11.75 | 384.895  | 16    |
| 384.9063 | 11.5  | 384.925  | 15    |
| 384.9375 | 13    | 384.9563 | 20.5  |
| 384.975  | 13.25 | 384.9888 | 14.5  |
| 385.0063 | 12.5  | 385.0213 | 13.5  |
| 385.0413 | 13    | 385.0525 | 16.75 |

|          |       |          |       |
|----------|-------|----------|-------|
| 385.0738 | 12    | 385.0888 | 16.75 |
| 385.1063 | 10.25 | 385.125  | 16    |
| 385.14   | 12.25 | 385.16   | 18    |
| 385.17   | 10    | 385.19   | 17.5  |
| 385.2013 | 8.75  | 385.2238 | 20.25 |
| 385.24   | 10.5  | 385.2563 | 19.75 |
| 385.2725 | 10    | 385.2863 | 17.5  |
| 385.3063 | 9.75  | 385.3188 | 16.75 |
| 385.3413 | 10.5  | 385.3575 | 17.75 |
| 385.3763 | 9.5   | 385.395  | 15.75 |
| 385.4063 | 8.5   | 385.425  | 17.5  |
| 385.4375 | 11.5  | 385.4563 | 18.5  |
| 385.475  | 12.5  | 385.4888 | 15.5  |
| 385.5063 | 10.75 | 385.5213 | 14.75 |
| 385.5413 | 8     | 385.5525 | 11.5  |
| 385.5738 | 8.75  | 385.5888 | 17    |
| 385.6063 | 13.5  | 385.6225 | 15    |
| 385.64   | 10.75 | 385.66   | 14    |
| 385.67   | 10.5  | 385.69   | 16    |
| 385.7063 | 13    | 385.7238 | 15.5  |
| 385.74   | 9.25  | 385.7563 | 14.75 |
| 385.7725 | 8.25  | 385.7863 | 16.5  |
| 385.8063 | 12.25 | 385.8213 | 15.5  |
| 385.8413 | 12    | 385.8575 | 12.5  |
| 385.8763 | 10.75 | 385.895  | 10.5  |
| 385.9063 | 12.75 | 385.925  | 15    |
| 385.9375 | 11    | 385.9563 | 14    |
| 385.975  | 13.75 | 385.9888 | 11.25 |
| 386.0063 | 12    | 386.0213 | 13.5  |
| 386.0413 | 11    | 386.0525 | 14.5  |
| 386.0738 | 12    | 386.0888 | 14.75 |
| 386.1063 | 11.75 | 386.1225 | 16.5  |
| 386.14   | 13.75 | 386.16   | 15    |
| 386.17   | 13.25 | 386.19   | 13.25 |
| 386.2063 | 10.75 | 386.2238 | 16.25 |
| 386.24   | 11.25 | 386.2563 | 16    |
| 386.2725 | 12    | 386.2863 | 14.25 |
| 386.3063 | 11.5  | 386.3225 | 18    |
| 386.3425 | 11.75 | 386.3575 | 15.5  |
| 386.3763 | 9.5   | 386.395  | 18    |
| 386.4088 | 9.25  | 386.425  | 18.25 |
| 386.4375 | 8     | 386.4563 | 18    |
| 386.475  | 6.25  | 386.4888 | 19.75 |
| 386.5063 | 12    | 386.5213 | 18    |
| 386.5413 | 9     | 386.5525 | 17.5  |
| 386.5738 | 8.75  | 386.5888 | 18.5  |
| 386.6063 | 14.75 | 386.6213 | 15.75 |
| 386.64   | 12    | 386.66   | 18    |
| 386.67   | 13.25 | 386.69   | 17    |
| 386.7063 | 10    | 386.7238 | 17.75 |



|          |       |          |       |
|----------|-------|----------|-------|
| 386.74   | 10    | 386.7563 | 16.25 |
| 386.7725 | 8.5   | 386.7863 | 16    |
| 386.8063 | 9     | 386.8225 | 18    |
| 386.8425 | 10.75 | 386.8575 | 14.25 |
| 386.8763 | 9.75  | 386.895  | 13.5  |
| 386.9063 | 8.5   | 386.925  | 16.25 |
| 386.9375 | 8     | 386.9563 | 18.5  |
| 386.975  | 7.25  | 386.9888 | 16.75 |
| 387.0063 | 11.25 | 387.0213 | 19    |
| 387.0425 | 12    | 387.0525 | 16    |
| 387.0738 | 10.5  | 387.0888 | 18.25 |
| 387.1063 | 11    | 387.1213 | 19.25 |
| 387.14   | 12    | 387.16   | 21.75 |
| 387.17   | 13.75 | 387.19   | 18.5  |
| 387.2063 | 11    | 387.2238 | 18.5  |
| 387.24   | 12.5  | 387.2563 | 20    |
| 387.2725 | 10.25 | 387.2888 | 25.75 |
| 387.3063 | 11.25 | 387.3238 | 22.5  |
| 387.3425 | 12.5  | 387.3613 | 21    |
| 387.3763 | 11    | 387.3963 | 23.25 |
| 387.4063 | 10    | 387.4263 | 25.25 |
| 387.4388 | 12.75 | 387.4588 | 21.5  |
| 387.475  | 16    | 387.49   | 19.5  |
| 387.5063 | 13.5  | 387.5225 | 21.5  |
| 387.5413 | 10.5  | 387.5575 | 24.75 |
| 387.5738 | 14.25 | 387.5913 | 18.75 |
| 387.6063 | 8.75  | 387.6238 | 19.25 |
| 387.64   | 10.75 | 387.6625 | 16.25 |
| 387.67   | 12    | 387.6925 | 17.5  |
| 387.7063 | 9.5   | 387.7275 | 16.5  |
| 387.74   | 14.25 | 387.7588 | 18    |
| 387.7725 | 11.25 | 387.7888 | 17    |
| 387.8063 | 13.25 | 387.8238 | 17    |
| 387.8425 | 15.25 | 387.8588 | 17.25 |
| 387.8763 | 11.75 | 387.8963 | 15.5  |
| 387.9063 | 12.25 | 387.9263 | 16.75 |
| 387.9388 | 11.5  | 387.9588 | 18.75 |
| 387.975  | 14.25 | 387.99   | 17.75 |
| 388.0063 | 11.25 | 388.0225 | 20.25 |
| 388.0413 | 14    | 388.0575 | 22.75 |
| 388.0763 | 13.25 | 388.0913 | 16.75 |
| 388.1063 | 10.25 | 388.1238 | 20    |
| 388.14   | 13.5  | 388.1625 | 19    |
| 388.17   | 7.25  | 388.1925 | 13.25 |
| 388.2063 | 9.25  | 388.2275 | 19.25 |
| 388.24   | 11.25 | 388.2588 | 17.5  |
| 388.2725 | 9.75  | 388.2888 | 18.25 |
| 388.3063 | 9.25  | 388.3238 | 18.5  |
| 388.3425 | 9.75  | 388.3588 | 19.25 |
| 388.3763 | 8     | 388.3938 | 16    |

|          |       |          |       |
|----------|-------|----------|-------|
| 388.4063 | 8     | 388.4263 | 21.5  |
| 388.4388 | 7.75  | 388.4588 | 18.25 |
| 388.475  | 10    | 388.49   | 18    |
| 388.5063 | 9.25  | 388.5225 | 17.25 |
| 388.5413 | 7.75  | 388.5575 | 15.5  |
| 388.5763 | 12.75 | 388.5913 | 14.75 |
| 388.6063 | 9.25  | 388.6238 | 15.25 |
| 388.64   | 13.75 | 388.6625 | 16.5  |
| 388.67   | 9.5   | 388.6925 | 18.5  |
| 388.7063 | 13.25 | 388.7275 | 20.25 |
| 388.74   | 10    | 388.7588 | 15.5  |
| 388.7725 | 10.5  | 388.7888 | 19.25 |
| 388.8063 | 11.5  | 388.8263 | 16.5  |
| 388.8425 | 8.25  | 388.8575 | 18    |
| 388.8763 | 10.75 | 388.8925 | 15.75 |
| 388.9063 | 13.75 | 388.9263 | 14    |
| 388.9388 | 8.75  | 388.9588 | 18.25 |
| 388.975  | 12    | 388.99   | 16    |
| 389.0063 | 9.5   | 389.0225 | 17.5  |
| 389.0413 | 17    | 389.0575 | 18.75 |
| 389.0763 | 9.75  | 389.0913 | 18.5  |
| 389.1063 | 13    | 389.1238 | 17.25 |
| 389.1425 | 15.25 | 389.1625 | 17.25 |
| 389.1725 | 10.75 | 389.1925 | 17    |
| 389.2088 | 11.25 | 389.2275 | 19    |
| 389.24   | 11    | 389.2588 | 16.75 |
| 389.2725 | 10.25 | 389.29   | 12.5  |
| 389.3063 | 9     | 389.3238 | 18.25 |
| 389.3425 | 9.5   | 389.3575 | 15    |
| 389.3763 | 14    | 389.3938 | 19.5  |
| 389.4063 | 9.5   | 389.4263 | 15    |
| 389.4388 | 12.5  | 389.46   | 12.75 |
| 389.475  | 13.5  | 389.49   | 13.5  |
| 389.5088 | 14.25 | 389.5225 | 20.5  |
| 389.5388 | 10.5  | 389.56   | 14.5  |
| 389.5763 | 14.75 | 389.5913 | 19    |
| 389.6063 | 10    | 389.6238 | 16.25 |
| 389.64   | 10.25 | 389.6625 | 17.25 |
| 389.6725 | 7.75  | 389.6925 | 16.75 |
| 389.7063 | 12    | 389.7275 | 18    |
| 389.7413 | 11    | 389.76   | 19.75 |
| 389.7725 | 10    | 389.79   | 15    |
| 389.8075 | 11.75 | 389.8238 | 15    |
| 389.8425 | 9     | 389.8575 | 18.75 |
| 389.8763 | 11.5  | 389.8913 | 15.5  |
| 389.9063 | 12    | 389.9263 | 15.75 |
| 389.9388 | 11.5  | 389.96   | 18.75 |
| 389.975  | 10.5  | 389.99   | 20.25 |
| 390.0088 | 9.25  | 390.0225 | 16.75 |
| 390.0388 | 10    | 390.06   | 16.75 |

|          |       |          |       |
|----------|-------|----------|-------|
| 390.0763 | 10.75 | 390.0913 | 15    |
| 390.1063 | 8.25  | 390.1238 | 16    |
| 390.14   | 8.25  | 390.16   | 13.75 |
| 390.1725 | 11    | 390.1925 | 16.5  |
| 390.2063 | 12.5  | 390.2275 | 12.25 |
| 390.24   | 11.75 | 390.2588 | 12.5  |
| 390.2725 | 8.75  | 390.29   | 13.5  |
| 390.3075 | 8.75  | 390.3238 | 12.75 |
| 390.3425 | 10.5  | 390.3575 | 15.5  |
| 390.3763 | 12.75 | 390.3938 | 16.5  |
| 390.4063 | 8.25  | 390.4263 | 16    |
| 390.4388 | 11.25 | 390.46   | 10.75 |
| 390.4725 | 8.75  | 390.49   | 14.25 |
| 390.5088 | 10    | 390.5225 | 13.5  |
| 390.54   | 15.5  | 390.56   | 16    |
| 390.5775 | 8.5   | 390.5913 | 16.5  |
| 390.61   | 10.75 | 390.6238 | 12.5  |
| 390.6413 | 13    | 390.66   | 14.75 |
| 390.6738 | 8.5   | 390.6925 | 13.75 |
| 390.7075 | 11.75 | 390.7275 | 17.5  |
| 390.7425 | 10.75 | 390.7588 | 13.5  |
| 390.775  | 13.25 | 390.79   | 17    |
| 390.81   | 9.75  | 390.8238 | 13.75 |
| 390.845  | 9.75  | 390.8575 | 15.75 |
| 390.8788 | 10.5  | 390.8913 | 18.25 |
| 390.91   | 13    | 390.9263 | 15.75 |
| 390.9413 | 9     | 390.96   | 13.25 |
| 390.975  | 9.75  | 390.99   | 16.75 |
| 391.01   | 13    | 391.025  | 18.75 |
| 391.04   | 11.75 | 391.06   | 16.75 |
| 391.0775 | 8.5   | 391.0913 | 18    |
| 391.11   | 8.75  | 391.1238 | 15.25 |
| 391.1413 | 10.25 | 391.16   | 19.5  |
| 391.1738 | 7.75  | 391.1925 | 19    |
| 391.2075 | 7.5   | 391.2275 | 17.5  |
| 391.2425 | 11    | 391.2588 | 19.75 |
| 391.2775 | 10    | 391.29   | 19.25 |
| 391.3125 | 6     | 391.3238 | 20.75 |
| 391.3488 | 11    | 391.3575 | 19.75 |
| 391.38   | 6.25  | 391.3925 | 17.75 |
| 391.4125 | 8.25  | 391.4263 | 16.5  |
| 391.4438 | 6.25  | 391.46   | 18    |
| 391.4763 | 9.25  | 391.49   | 18    |
| 391.5113 | 7     | 391.525  | 14    |
| 391.5413 | 10.25 | 391.56   | 15.75 |
| 391.58   | 7.75  | 391.5938 | 17.25 |
| 391.6125 | 10.75 | 391.6263 | 15.75 |
| 391.645  | 10.25 | 391.6613 | 14    |
| 391.675  | 13    | 391.695  | 12.5  |
| 391.71   | 9.5   | 391.73   | 14.5  |

|          |       |          |       |
|----------|-------|----------|-------|
| 391.7488 | 11.5  | 391.7613 | 18.75 |
| 391.7775 | 12.25 | 391.7925 | 18    |
| 391.8125 | 15.5  | 391.825  | 18    |
| 391.8463 | 10.5  | 391.8588 | 16    |
| 391.88   | 16    | 391.8963 | 17.25 |
| 391.9125 | 10.25 | 391.9275 | 20.25 |
| 391.9438 | 12.5  | 391.9613 | 14.75 |
| 391.9763 | 13    | 391.9913 | 17.5  |
| 392.0113 | 11    | 392.0263 | 16    |
| 392.0438 | 10    | 392.0625 | 15.25 |
| 392.08   | 12.75 | 392.0938 | 16.5  |
| 392.1125 | 11.75 | 392.1263 | 18    |
| 392.145  | 11.25 | 392.1613 | 21.25 |
| 392.175  | 9.5   | 392.195  | 16    |
| 392.21   | 9.5   | 392.23   | 15.75 |
| 392.245  | 10.5  | 392.2613 | 21.25 |
| 392.2775 | 12.25 | 392.2925 | 16.5  |
| 392.3125 | 12.75 | 392.325  | 15.75 |
| 392.3463 | 11.75 | 392.3588 | 14.75 |
| 392.38   | 10.5  | 392.3963 | 21    |
| 392.4125 | 11.25 | 392.4275 | 16    |
| 392.4438 | 11.75 | 392.4613 | 20    |
| 392.4763 | 9.75  | 392.4913 | 22.25 |
| 392.5113 | 10.25 | 392.5263 | 16.75 |
| 392.5438 | 12.75 | 392.5625 | 19    |
| 392.5775 | 11.75 | 392.5938 | 19.75 |
| 392.6125 | 15.25 | 392.6263 | 14.25 |
| 392.645  | 12.25 | 392.6613 | 16.5  |
| 392.6788 | 17.75 | 392.6975 | 18    |
| 392.7125 | 13.25 | 392.73   | 22    |
| 392.7475 | 10.75 | 392.7625 | 18.5  |
| 392.78   | 12.25 | 392.7925 | 17.25 |
| 392.815  | 9.25  | 392.825  | 16.75 |
| 392.8513 | 8.75  | 392.8613 | 15.25 |
| 392.8838 | 10    | 392.8988 | 16.25 |
| 392.9175 | 8.5   | 392.93   | 14.25 |
| 392.95   | 10.5  | 392.9638 | 13.75 |
| 392.9838 | 9.25  | 392.9938 | 15    |
| 393.0163 | 10.75 | 393.0275 | 14.5  |
| 393.0488 | 6.75  | 393.0638 | 17.5  |
| 393.085  | 8.25  | 393.095  | 18.25 |
| 393.1188 | 9.5   | 393.13   | 18.75 |
| 393.1513 | 8.25  | 393.1625 | 20.25 |
| 393.1825 | 10.25 | 393.1963 | 17.75 |
| 393.2175 | 9.5   | 393.2313 | 17.25 |
| 393.2513 | 10    | 393.265  | 17.5  |
| 393.2875 | 11.5  | 393.2975 | 17.75 |
| 393.3188 | 11    | 393.3275 | 15.75 |
| 393.3525 | 14.75 | 393.3613 | 15.5  |
| 393.3875 | 12    | 393.3988 | 18.5  |

|          |       |          |       |
|----------|-------|----------|-------|
| 393.4175 | 13    | 393.43   | 17.75 |
| 393.4475 | 10.25 | 393.4638 | 16.25 |
| 393.4838 | 11.75 | 393.4938 | 14.5  |
| 393.5188 | 12.75 | 393.5275 | 17    |
| 393.5488 | 10.75 | 393.5638 | 15.5  |
| 393.585  | 13.25 | 393.595  | 16.75 |
| 393.6188 | 12.75 | 393.63   | 17.5  |
| 393.6513 | 13.25 | 393.6625 | 16.25 |
| 393.6825 | 10.75 | 393.6938 | 14    |
| 393.72   | 10    | 393.7313 | 16.25 |
| 393.7513 | 12    | 393.765  | 14.25 |
| 393.7863 | 14.5  | 393.7963 | 17.5  |
| 393.8188 | 12.75 | 393.8275 | 16    |
| 393.8525 | 9.75  | 393.8613 | 16    |
| 393.8875 | 13.5  | 393.8963 | 14.75 |
| 393.9175 | 11    | 393.93   | 18.25 |
| 393.9475 | 12.5  | 393.9638 | 19.25 |
| 393.9838 | 12.75 | 393.9938 | 15.75 |
| 394.0188 | 11    | 394.0275 | 17.75 |
| 394.0488 | 10    | 394.0638 | 17.75 |
| 394.085  | 14    | 394.095  | 15.25 |
| 394.1188 | 8.5   | 394.1325 | 13.5  |
| 394.1513 | 12.75 | 394.1638 | 14.25 |
| 394.1825 | 12    | 394.195  | 15    |
| 394.22   | 13.5  | 394.2325 | 13.75 |
| 394.2513 | 9.5   | 394.2675 | 17.5  |
| 394.2863 | 10.5  | 394.2988 | 12.75 |
| 394.3188 | 12.5  | 394.3313 | 14.75 |
| 394.355  | 11.25 | 394.3625 | 16.5  |
| 394.3875 | 10.75 | 394.3988 | 13    |
| 394.4175 | 10.75 | 394.4325 | 12.25 |
| 394.4475 | 11.5  | 394.4663 | 14    |
| 394.4838 | 10.5  | 394.4988 | 17    |
| 394.5188 | 10.5  | 394.5288 | 15.25 |
| 394.5488 | 11.5  | 394.565  | 16    |
| 394.585  | 13.25 | 394.5975 | 15    |
| 394.6188 | 14.25 | 394.6325 | 11.75 |
| 394.6513 | 13    | 394.6638 | 12.75 |
| 394.6825 | 11.75 | 394.695  | 16    |
| 394.72   | 13    | 394.7325 | 14.75 |
| 394.7525 | 8.75  | 394.7675 | 13.75 |
| 394.7863 | 9.75  | 394.7988 | 17    |
| 394.8163 | 14    | 394.8313 | 15.5  |
| 394.8525 | 12.25 | 394.8625 | 14    |
| 394.8875 | 12.75 | 394.8988 | 15    |
| 394.9175 | 14.5  | 394.9325 | 18.25 |
| 394.9475 | 11.5  | 394.9663 | 11.25 |
| 394.9838 | 9.25  | 394.9988 | 18    |
| 395.0188 | 13    | 395.0288 | 13.25 |
| 395.0488 | 10.5  | 395.065  | 11.5  |

|          |       |          |       |
|----------|-------|----------|-------|
| 395.085  | 9.75  | 395.0975 | 14.5  |
| 395.1188 | 14    | 395.1325 | 14.25 |
| 395.1513 | 11.25 | 395.1638 | 15.75 |
| 395.1825 | 10    | 395.195  | 19.25 |
| 395.22   | 12.75 | 395.2325 | 10.5  |
| 395.2538 | 14    | 395.2675 | 13.75 |
| 395.2863 | 11.25 | 395.2988 | 11.75 |
| 395.3163 | 10.5  | 395.3313 | 15.5  |
| 395.3525 | 10.5  | 395.3625 | 13.25 |
| 395.3875 | 12.25 | 395.3988 | 16.5  |
| 395.4175 | 10.25 | 395.4325 | 15.25 |
| 395.4475 | 13.25 | 395.465  | 15.25 |
| 395.4838 | 14.25 | 395.4988 | 16.25 |
| 395.5188 | 9     | 395.5288 | 21.25 |
| 395.5488 | 12    | 395.565  | 17.75 |
| 395.585  | 11.5  | 395.5975 | 14    |
| 395.6188 | 10.5  | 395.6325 | 18    |
| 395.6513 | 9.25  | 395.6638 | 18.25 |
| 395.6825 | 10.5  | 395.695  | 13.75 |
| 395.72   | 11.75 | 395.7338 | 15.5  |
| 395.7538 | 13.25 | 395.7675 | 18.75 |
| 395.7863 | 14.25 | 395.7988 | 15.25 |
| 395.8163 | 12.25 | 395.8313 | 14.5  |
| 395.8525 | 15    | 395.8625 | 18.5  |
| 395.8875 | 9.75  | 395.8988 | 12.5  |
| 395.9175 | 11.5  | 395.9325 | 14.75 |
| 395.9475 | 15    | 395.965  | 19    |
| 395.9838 | 12.5  | 395.9988 | 18    |
| 396.0188 | 16.5  | 396.0288 | 15.25 |
| 396.0488 | 13.25 | 396.065  | 15    |
| 396.085  | 10.75 | 396.0975 | 13    |
| 396.12   | 12.5  | 396.1325 | 15.5  |
| 396.1525 | 11.75 | 396.1625 | 15    |
| 396.1825 | 16.75 | 396.195  | 11.5  |
| 396.22   | 11.75 | 396.2338 | 9.75  |
| 396.2538 | 12.5  | 396.2675 | 13    |
| 396.2875 | 10.25 | 396.2988 | 11.5  |
| 396.3163 | 11.5  | 396.3313 | 8     |
| 396.3538 | 14.5  | 396.3625 | 15.5  |
| 396.3875 | 12.5  | 396.3988 | 14.5  |
| 396.4175 | 11.25 | 396.4325 | 12    |
| 396.4475 | 11    | 396.465  | 17.25 |
| 396.4838 | 16.25 | 396.4988 | 13.75 |
| 396.5188 | 10.75 | 396.5288 | 14.75 |
| 396.5488 | 13.5  | 396.565  | 16.25 |
| 396.585  | 13.75 | 396.5975 | 15.5  |
| 396.62   | 11.75 | 396.6325 | 16    |
| 396.6513 | 14.75 | 396.6625 | 13.75 |
| 396.6825 | 14.25 | 396.695  | 17.5  |
| 396.72   | 13.5  | 396.7338 | 17.25 |

|          |       |
|----------|-------|
| 396.7538 | 14.5  |
| 396.7863 | 14.75 |
| 396.8188 | 15.5  |
| 396.8525 | 11.75 |
| 396.8875 | 14    |
| 396.9175 | 13.25 |
| 396.95   | 16.5  |
| 396.9838 | 12.75 |
| 397.0188 | 13    |
| 397.0488 | 12.5  |
| 397.085  | 12.5  |
| 397.12   | 12.25 |
| 397.1513 | 14    |
| 397.1825 | 12.5  |
| 397.22   | 10.5  |
| 397.2538 | 12.75 |
| 397.2863 | 13.25 |
| 397.3188 | 14.25 |
| 397.3525 | 15.75 |
| 397.3875 | 13.25 |
| 397.4175 | 13.75 |
| 397.4475 | 13    |
| 397.4863 | 14.5  |
| 397.5188 | 14    |
| 397.5488 | 11    |
| 397.585  | 11.25 |
| 397.62   | 12.75 |
| 397.6513 | 11.75 |
| 397.6825 | 10.25 |
| 397.72   | 9.75  |
| 397.7538 | 10.75 |
| 397.7863 | 12.5  |
| 397.8188 | 7     |
| 397.8525 | 11.75 |
| 397.8875 | 10.75 |
| 397.9175 | 11    |
| 397.9475 | 13.25 |
| 397.9863 | 11.25 |
| 398.0188 | 13.25 |
| 398.0488 | 13.75 |
| 398.085  | 12.75 |
| 398.12   | 15.25 |
| 398.1513 | 10.25 |
| 398.1825 | 10.25 |
| 398.22   | 13.75 |
| 398.2538 | 13    |
| 398.2863 | 15    |
| 398.3188 | 12.5  |
| 398.3525 | 13.75 |
| 398.3875 | 14.25 |

|          |       |
|----------|-------|
| 396.7675 | 14.5  |
| 396.7988 | 15.5  |
| 396.8313 | 16    |
| 396.8625 | 18.25 |
| 396.8988 | 17    |
| 396.9325 | 14    |
| 396.9675 | 17.25 |
| 396.9988 | 16.5  |
| 397.0288 | 15    |
| 397.065  | 19    |
| 397.0975 | 16.25 |
| 397.1325 | 14    |
| 397.1625 | 18.25 |
| 397.195  | 15.5  |
| 397.2338 | 16.25 |
| 397.2675 | 17.5  |
| 397.2988 | 15.5  |
| 397.3313 | 13.75 |
| 397.3625 | 20.75 |
| 397.3988 | 15.75 |
| 397.4325 | 18.25 |
| 397.4675 | 18.25 |
| 397.4988 | 15.75 |
| 397.5313 | 17.5  |
| 397.565  | 15    |
| 397.5975 | 15.75 |
| 397.6325 | 18.75 |
| 397.6625 | 19    |
| 397.695  | 16.25 |
| 397.7313 | 19    |
| 397.7675 | 17    |
| 397.7988 | 17.25 |
| 397.8313 | 17.75 |
| 397.8625 | 16.75 |
| 397.8988 | 15.5  |
| 397.9325 | 13.5  |
| 397.9675 | 13.75 |
| 397.9988 | 13.75 |
| 398.0313 | 18.25 |
| 398.0675 | 13.75 |
| 398.0988 | 22    |
| 398.1338 | 15    |
| 398.165  | 14.5  |
| 398.1975 | 15.25 |
| 398.235  | 17.75 |
| 398.2688 | 18.5  |
| 398.3013 | 19    |
| 398.3338 | 14.25 |
| 398.365  | 15.75 |
| 398.4013 | 11.25 |

|          |       |          |       |
|----------|-------|----------|-------|
| 398.4175 | 14.25 | 398.4313 | 16.25 |
| 398.45   | 13    | 398.4688 | 14.25 |
| 398.4863 | 15.25 | 398.5013 | 13.5  |
| 398.5188 | 13.25 | 398.5338 | 16    |
| 398.5488 | 16.25 | 398.5688 | 11.5  |
| 398.5838 | 14.75 | 398.5988 | 14    |
| 398.62   | 10    | 398.6338 | 15.5  |
| 398.6513 | 13.75 | 398.665  | 13    |
| 398.6825 | 16.25 | 398.7    | 13.25 |
| 398.7175 | 16.5  | 398.735  | 15.25 |
| 398.7538 | 18    | 398.7688 | 15.25 |
| 398.7863 | 14.25 | 398.8013 | 13.75 |
| 398.8188 | 16.25 | 398.8338 | 16    |
| 398.8525 | 15    | 398.865  | 15.75 |
| 398.8888 | 14.75 | 398.9013 | 13.5  |
| 398.9175 | 15.25 | 398.9313 | 12    |
| 398.95   | 14.5  | 398.9688 | 12.5  |
| 398.9863 | 12.25 | 399.0013 | 12    |
| 399.0188 | 11.5  | 399.0338 | 11.75 |
| 399.0488 | 8.25  | 399.0688 | 10.5  |
| 399.0838 | 14.5  | 399.0988 | 16.75 |
| 399.12   | 14.25 | 399.1338 | 14.75 |
| 399.1513 | 10.25 | 399.165  | 16.25 |
| 399.1825 | 12.25 | 399.2    | 15.5  |
| 399.2213 | 12.25 | 399.2338 | 16.75 |
| 399.2538 | 9.75  | 399.2688 | 18.25 |
| 399.2863 | 11    | 399.3013 | 20.75 |
| 399.3213 | 9.5   | 399.3338 | 18    |
| 399.3525 | 11.25 | 399.365  | 19.5  |
| 399.3875 | 9.5   | 399.4013 | 15.25 |
| 399.4175 | 9.25  | 399.4313 | 18.75 |
| 399.45   | 12    | 399.4688 | 19.25 |
| 399.4888 | 10.25 | 399.5013 | 19.5  |
| 399.5188 | 9     | 399.5338 | 18.25 |
| 399.5488 | 10    | 399.5688 | 18.25 |
| 399.5838 | 7.75  | 399.5988 | 20    |
| 399.62   | 8.75  | 399.6338 | 23.25 |
| 399.6513 | 7     | 399.665  | 16.25 |
| 399.6825 | 7.75  | 399.7    | 17.75 |
| 399.7213 | 7.25  | 399.7363 | 15    |
| 399.7538 | 5.75  | 399.7688 | 18.75 |
| 399.7863 | 8.5   | 399.8013 | 16.75 |
| 399.8188 | 7.5   | 399.8338 | 17.25 |
| 399.8525 | 8.5   | 399.865  | 16.5  |
| 399.8875 | 6.25  | 399.9013 | 20    |
| 399.9175 | 10.75 | 399.9313 | 19.5  |
| 399.95   | 11.25 | 399.9675 | 16.25 |
| 399.9888 | 12.25 | 400.0038 | 20.25 |
| 400.0188 | 9.75  | 400.0338 | 20    |
| 400.0488 | 11.75 | 400.0688 | 21.5  |



|          |       |
|----------|-------|
| 400.0838 | 8.5   |
| 400.12   | 13.75 |
| 400.1513 | 11.25 |
| 400.1825 | 10.25 |
| 400.2188 | 8.75  |
| 400.2538 | 9     |
| 400.2863 | 7.75  |
| 400.3188 | 10    |
| 400.3525 | 9.75  |
| 400.3875 | 10    |
| 400.4175 | 6.25  |
| 400.45   | 6     |
| 400.4913 | 6.75  |
| 400.5213 | 10.5  |
| 400.5513 | 8.5   |
| 400.5863 | 7.5   |
| 400.6213 | 7.25  |
| 400.6525 | 11.5  |
| 400.6863 | 10    |
| 400.7225 | 9.75  |
| 400.755  | 9.5   |
| 400.7875 | 8.5   |
| 400.82   | 9.25  |
| 400.8575 | 9.25  |
| 400.89   | 12.75 |
| 400.9213 | 12.75 |
| 400.9525 | 12.25 |
| 400.9913 | 9.5   |
| 401.0213 | 11.75 |
| 401.0513 | 14    |
| 401.0863 | 12.75 |
| 401.1213 | 13.5  |
| 401.1525 | 11.5  |
| 401.1863 | 11.25 |
| 401.2225 | 12.5  |
| 401.255  | 11.25 |
| 401.2875 | 13    |
| 401.32   | 16.25 |
| 401.355  | 14.75 |
| 401.39   | 14    |
| 401.4213 | 13.25 |
| 401.455  | 13.25 |
| 401.4913 | 15    |
| 401.5213 | 17    |
| 401.5525 | 15.25 |
| 401.5863 | 14.75 |
| 401.6213 | 9     |
| 401.6525 | 9.75  |
| 401.6863 | 13.25 |
| 401.7238 | 11    |

|          |       |
|----------|-------|
| 400.0988 | 23    |
| 400.1338 | 21    |
| 400.165  | 20.25 |
| 400.2    | 22.5  |
| 400.2338 | 18.75 |
| 400.27   | 16.25 |
| 400.3013 | 16.25 |
| 400.3338 | 21.25 |
| 400.365  | 13.75 |
| 400.4013 | 18.75 |
| 400.4313 | 14.25 |
| 400.4675 | 17.5  |
| 400.5013 | 17.75 |
| 400.5338 | 21.5  |
| 400.5688 | 18.25 |
| 400.5988 | 19.25 |
| 400.6338 | 22    |
| 400.665  | 18    |
| 400.7    | 17.75 |
| 400.7338 | 16    |
| 400.77   | 19    |
| 400.8013 | 14.25 |
| 400.8338 | 17.25 |
| 400.8688 | 17.25 |
| 400.9013 | 18.5  |
| 400.9325 | 16    |
| 400.9675 | 22    |
| 401.0013 | 20.75 |
| 401.0338 | 19.5  |
| 401.0688 | 17.5  |
| 401.1013 | 22.75 |
| 401.1338 | 22.25 |
| 401.165  | 25.75 |
| 401.1975 | 22.25 |
| 401.2338 | 21    |
| 401.27   | 19    |
| 401.3013 | 18.5  |
| 401.3338 | 25.25 |
| 401.3688 | 25.25 |
| 401.4013 | 19    |
| 401.4325 | 21    |
| 401.4675 | 21.5  |
| 401.4988 | 23.5  |
| 401.5338 | 22.25 |
| 401.5688 | 19.25 |
| 401.5988 | 20    |
| 401.6338 | 17.75 |
| 401.665  | 23.75 |
| 401.6975 | 19.75 |
| 401.7338 | 18.75 |

|          |       |          |       |
|----------|-------|----------|-------|
| 401.755  | 11.25 | 401.77   | 18.25 |
| 401.7875 | 12.75 | 401.8013 | 20.25 |
| 401.82   | 10.25 | 401.8338 | 19    |
| 401.855  | 9.75  | 401.8688 | 19.75 |
| 401.89   | 12.75 | 401.9013 | 16.25 |
| 401.9213 | 14.25 | 401.9325 | 20.75 |
| 401.955  | 9.25  | 401.9675 | 20.25 |
| 401.9913 | 14.75 | 401.9988 | 18.5  |
| 402.0213 | 10.5  | 402.0338 | 19    |
| 402.0525 | 8.75  | 402.0688 | 21.25 |
| 402.0863 | 12.75 | 402.0988 | 22    |
| 402.1213 | 7.5   | 402.1338 | 19.75 |
| 402.1525 | 9.5   | 402.165  | 16.75 |
| 402.1863 | 11    | 402.1975 | 16.5  |
| 402.2225 | 9     | 402.2338 | 18.25 |
| 402.255  | 10.5  | 402.27   | 22.5  |
| 402.2875 | 12.25 | 402.3013 | 21.25 |
| 402.32   | 11    | 402.3338 | 16.5  |
| 402.355  | 11.5  | 402.3688 | 21.5  |
| 402.39   | 10.25 | 402.4013 | 18.75 |
| 402.4213 | 11.75 | 402.4325 | 17    |
| 402.455  | 11    | 402.4675 | 17.75 |
| 402.4913 | 8.25  | 402.4988 | 19    |
| 402.5213 | 8     | 402.5338 | 16.25 |
| 402.5525 | 11.25 | 402.5713 | 15.5  |
| 402.5863 | 13.25 | 402.6025 | 19.25 |
| 402.6213 | 10.5  | 402.6363 | 17.25 |
| 402.6525 | 8.75  | 402.6675 | 17.75 |
| 402.6863 | 8     | 402.7    | 17    |
| 402.7225 | 10.75 | 402.7363 | 20.5  |
| 402.7575 | 11    | 402.7713 | 17.75 |
| 402.7875 | 10.25 | 402.8025 | 17.25 |
| 402.82   | 11    | 402.835  | 15.75 |
| 402.855  | 10.75 | 402.8713 | 14.75 |
| 402.89   | 12    | 402.9025 | 11.75 |
| 402.9225 | 11.25 | 402.9338 | 14    |
| 402.955  | 11.25 | 402.9675 | 14.25 |
| 402.9913 | 11.5  | 403.0013 | 14.5  |
| 403.0213 | 12.25 | 403.0363 | 17    |
| 403.0525 | 11.5  | 403.0713 | 15.75 |
| 403.0863 | 15    | 403.1025 | 20.5  |
| 403.1213 | 14.25 | 403.1363 | 16.5  |
| 403.1525 | 12.25 | 403.1675 | 19.75 |
| 403.1863 | 18.5  | 403.2    | 23.25 |
| 403.2225 | 14.25 | 403.2338 | 15.5  |
| 403.255  | 13.25 | 403.2713 | 16.25 |
| 403.2875 | 14.25 | 403.3025 | 16.5  |
| 403.32   | 17.5  | 403.335  | 18.75 |
| 403.355  | 13.75 | 403.3713 | 14.5  |
| 403.39   | 15    | 403.4025 | 19.75 |

|          |       |
|----------|-------|
| 403.4213 | 12.5  |
| 403.455  | 11.25 |
| 403.4913 | 10.25 |
| 403.5238 | 10.5  |
| 403.5525 | 14    |
| 403.5863 | 12.5  |
| 403.62   | 13.5  |
| 403.655  | 11.75 |
| 403.6875 | 16.25 |
| 403.7225 | 12.75 |
| 403.755  | 10.5  |
| 403.7875 | 10.75 |
| 403.8225 | 10.25 |
| 403.855  | 7.5   |
| 403.89   | 8     |
| 403.9213 | 11.5  |
| 403.955  | 13.75 |
| 403.9913 | 13.75 |
| 404.0213 | 9     |
| 404.0525 | 12.75 |
| 404.0863 | 11    |
| 404.1238 | 15.25 |
| 404.155  | 15    |
| 404.1875 | 16.5  |
| 404.2225 | 17.25 |
| 404.255  | 13.75 |
| 404.2875 | 12.5  |
| 404.32   | 18.25 |
| 404.355  | 13.5  |
| 404.39   | 13.25 |
| 404.4213 | 16    |
| 404.455  | 15.75 |
| 404.4913 | 16.5  |
| 404.5213 | 17.25 |
| 404.5525 | 13.25 |
| 404.5863 | 12.5  |
| 404.62   | 12.75 |
| 404.655  | 14    |
| 404.6875 | 10    |
| 404.72   | 12.75 |
| 404.755  | 9.5   |
| 404.79   | 11.75 |
| 404.8213 | 11.25 |
| 404.855  | 10    |
| 404.89   | 10.5  |
| 404.9213 | 11.5  |
| 404.955  | 12.75 |
| 404.9913 | 13.5  |
| 405.0213 | 16.25 |
| 405.0525 | 16.75 |

|          |       |
|----------|-------|
| 403.4338 | 18    |
| 403.4675 | 14    |
| 403.5013 | 17.5  |
| 403.5363 | 18    |
| 403.5713 | 21.5  |
| 403.6025 | 17    |
| 403.6363 | 15.25 |
| 403.6688 | 18.25 |
| 403.7    | 18.5  |
| 403.7338 | 16.5  |
| 403.7713 | 14    |
| 403.8025 | 22.75 |
| 403.835  | 18    |
| 403.8713 | 18.75 |
| 403.9025 | 17.75 |
| 403.9338 | 19.75 |
| 403.9675 | 16.5  |
| 404.0038 | 16.5  |
| 404.0375 | 20.5  |
| 404.0713 | 20.5  |
| 404.105  | 21.25 |
| 404.1363 | 22    |
| 404.1675 | 16.25 |
| 404.2    | 19.75 |
| 404.2338 | 20.5  |
| 404.2713 | 18.5  |
| 404.3025 | 19.75 |
| 404.335  | 18.75 |
| 404.3713 | 19    |
| 404.4025 | 16.5  |
| 404.4338 | 20.75 |
| 404.4675 | 21.25 |
| 404.5038 | 19.75 |
| 404.5363 | 16.75 |
| 404.5713 | 20    |
| 404.605  | 23.25 |
| 404.6363 | 18.25 |
| 404.6675 | 18.5  |
| 404.7    | 19.25 |
| 404.7338 | 17.75 |
| 404.77   | 21    |
| 404.8025 | 17.75 |
| 404.835  | 20.5  |
| 404.8713 | 22.5  |
| 404.9025 | 17.75 |
| 404.9338 | 18.25 |
| 404.9675 | 20.5  |
| 405.0038 | 16    |
| 405.0363 | 18    |
| 405.0713 | 18    |

|          |       |          |       |
|----------|-------|----------|-------|
| 405.0875 | 17.75 | 405.105  | 16.75 |
| 405.1225 | 13    | 405.1363 | 18.75 |
| 405.155  | 18.25 | 405.1675 | 16    |
| 405.1875 | 14.25 | 405.2    | 18.25 |
| 405.22   | 15.25 | 405.2313 | 14    |
| 405.255  | 13.75 | 405.27   | 15.75 |
| 405.2913 | 13    | 405.3025 | 16.25 |
| 405.32   | 13.25 | 405.3375 | 18.75 |
| 405.355  | 17.75 | 405.3713 | 17.5  |
| 405.39   | 14.25 | 405.4025 | 17.25 |
| 405.4238 | 19.25 | 405.4338 | 15.25 |
| 405.455  | 14.25 | 405.4675 | 18.75 |
| 405.4913 | 13.5  | 405.5025 | 20.5  |
| 405.5213 | 12    | 405.5363 | 19.5  |
| 405.5525 | 15.25 | 405.5713 | 18.25 |
| 405.5875 | 13    | 405.605  | 22    |
| 405.62   | 13    | 405.6363 | 22.75 |
| 405.655  | 13.5  | 405.6675 | 22    |
| 405.6875 | 14.75 | 405.7    | 20    |
| 405.7213 | 15    | 405.7313 | 17.5  |
| 405.755  | 14    | 405.77   | 20.25 |
| 405.79   | 15.25 | 405.8025 | 21.5  |
| 405.82   | 14.25 | 405.8375 | 19.5  |
| 405.8575 | 14.25 | 405.8713 | 18.25 |
| 405.8888 | 12.75 | 405.9025 | 21.25 |
| 405.9238 | 15.5  | 405.9338 | 18.5  |
| 405.955  | 15.75 | 405.9675 | 17.5  |
| 405.9913 | 15    | 406.0025 | 17    |
| 406.0213 | 15.75 | 406.0363 | 20    |
| 406.0525 | 18.75 | 406.0713 | 16.5  |
| 406.0875 | 12.5  | 406.1075 | 21.25 |
| 406.12   | 16.75 | 406.1363 | 16.25 |
| 406.1575 | 17.25 | 406.1675 | 19.75 |
| 406.19   | 17.75 | 406.2025 | 20.25 |
| 406.2238 | 13.25 | 406.2313 | 17.75 |
| 406.2563 | 12    | 406.27   | 20.5  |
| 406.2913 | 14.5  | 406.3025 | 16.75 |
| 406.3213 | 10    | 406.3375 | 18.5  |
| 406.3588 | 13.75 | 406.3713 | 19.5  |
| 406.39   | 15.5  | 406.4025 | 17.5  |
| 406.425  | 12.75 | 406.4338 | 19    |
| 406.4588 | 16.5  | 406.4675 | 18    |
| 406.4938 | 13.25 | 406.5025 | 16.5  |
| 406.5238 | 11.5  | 406.5363 | 19.5  |
| 406.555  | 11.75 | 406.5713 | 15.75 |
| 406.59   | 12.75 | 406.605  | 16.75 |
| 406.6225 | 14.5  | 406.6363 | 18.5  |
| 406.6575 | 14    | 406.6675 | 18.25 |
| 406.69   | 13.25 | 406.7    | 18.25 |
| 406.7238 | 10.5  | 406.7313 | 19.75 |

|          |       |          |       |
|----------|-------|----------|-------|
| 406.7563 | 16.25 | 406.77   | 22    |
| 406.7913 | 15.25 | 406.8038 | 19.5  |
| 406.8225 | 13.25 | 406.8388 | 14.75 |
| 406.8588 | 14.25 | 406.8713 | 19    |
| 406.89   | 15    | 406.9025 | 20.75 |
| 406.925  | 12.75 | 406.9338 | 17.25 |
| 406.9563 | 16.25 | 406.9675 | 20.5  |
| 406.9938 | 15.75 | 407      | 16.25 |
| 407.025  | 13.5  | 407.0363 | 18.25 |
| 407.0575 | 13.5  | 407.0713 | 15.25 |
| 407.09   | 15    | 407.105  | 21.5  |
| 407.1225 | 12    | 407.1363 | 19.75 |
| 407.16   | 10.5  | 407.1675 | 18.25 |
| 407.19   | 12    | 407.2025 | 20    |
| 407.2238 | 10.25 | 407.235  | 22.5  |
| 407.2563 | 7.5   | 407.2713 | 18.25 |
| 407.2913 | 10    | 407.305  | 20.25 |
| 407.3213 | 10    | 407.3413 | 16    |
| 407.3588 | 12    | 407.3738 | 17.5  |
| 407.39   | 11.5  | 407.405  | 23.25 |
| 407.425  | 12.25 | 407.4363 | 17.25 |
| 407.4563 | 13.5  | 407.4688 | 17.75 |
| 407.4938 | 12.75 | 407.5025 | 19.5  |
| 407.525  | 14    | 407.5388 | 16.5  |
| 407.555  | 13.75 | 407.5725 | 22.75 |
| 407.59   | 12.75 | 407.6063 | 19.5  |
| 407.625  | 14.75 | 407.6375 | 18    |
| 407.66   | 16.75 | 407.6688 | 19.5  |
| 407.69   | 16    | 407.7025 | 19.5  |
| 407.7238 | 18    | 407.735  | 18    |
| 407.7563 | 15.5  | 407.7713 | 19    |
| 407.7913 | 16.25 | 407.805  | 16.5  |
| 407.8213 | 16.25 | 407.8413 | 15.5  |
| 407.8588 | 17.75 | 407.8738 | 19.25 |
| 407.89   | 15.5  | 407.905  | 18.5  |
| 407.925  | 14.25 | 407.9363 | 18.5  |
| 407.96   | 16    | 407.9688 | 17    |
| 407.9938 | 14.75 | 408.0025 | 17.5  |
| 408.025  | 14    | 408.0388 | 16.75 |
| 408.055  | 15.5  | 408.0725 | 18.25 |
| 408.09   | 11.5  | 408.1063 | 18.5  |
| 408.125  | 15    | 408.1375 | 18    |
| 408.1588 | 14.75 | 408.1688 | 17    |
| 408.19   | 14    | 408.2025 | 20.5  |
| 408.2238 | 15.25 | 408.2338 | 18    |
| 408.2575 | 13.25 | 408.2688 | 21.25 |
| 408.2913 | 12.75 | 408.305  | 19.75 |
| 408.3213 | 15    | 408.3413 | 22    |
| 408.3588 | 16    | 408.375  | 21.25 |
| 408.39   | 12.75 | 408.405  | 23.25 |

|          |       |          |       |
|----------|-------|----------|-------|
| 408.425  | 12.75 | 408.4363 | 22.25 |
| 408.4563 | 14.25 | 408.4688 | 18.5  |
| 408.4938 | 11.75 | 408.5025 | 22.75 |
| 408.525  | 14.75 | 408.5388 | 17.75 |
| 408.555  | 15.25 | 408.5725 | 18    |
| 408.59   | 13.5  | 408.6063 | 16    |
| 408.625  | 16    | 408.6375 | 22    |
| 408.6588 | 19    | 408.6688 | 18    |
| 408.69   | 16    | 408.7025 | 19.75 |
| 408.7238 | 15.25 | 408.7338 | 21.25 |
| 408.7563 | 19.25 | 408.7688 | 19.75 |
| 408.7913 | 19.5  | 408.805  | 19.5  |
| 408.8213 | 20.5  | 408.8413 | 15.75 |
| 408.8613 | 18    | 408.8738 | 23.25 |
| 408.8913 | 17.75 | 408.905  | 21    |
| 408.9225 | 21.75 | 408.9363 | 21.5  |
| 408.9563 | 19.5  | 408.9688 | 23.25 |
| 408.9938 | 15.25 | 409.0025 | 20.5  |
| 409.025  | 19.25 | 409.0388 | 23.5  |
| 409.055  | 20.25 | 409.075  | 26.25 |
| 409.09   | 12.25 | 409.1063 | 23.25 |
| 409.125  | 13.25 | 409.1375 | 19.75 |
| 409.1588 | 11.5  | 409.1688 | 27.5  |
| 409.19   | 14.5  | 409.2025 | 22.25 |
| 409.2238 | 11.75 | 409.2338 | 24.75 |
| 409.2588 | 9.75  | 409.2688 | 23.75 |
| 409.2913 | 12    | 409.305  | 28.25 |
| 409.3238 | 12    | 409.3413 | 27.25 |
| 409.36   | 13.75 | 409.3738 | 26.25 |
| 409.3913 | 11    | 409.405  | 23    |
| 409.4225 | 11.5  | 409.4363 | 20.5  |
| 409.4588 | 12.5  | 409.4688 | 27    |
| 409.4938 | 13.75 | 409.5025 | 25    |
| 409.525  | 16.75 | 409.5388 | 21.75 |
| 409.555  | 21    | 409.5738 | 22.5  |
| 409.59   | 19    | 409.6063 | 22    |
| 409.625  | 19.25 | 409.64   | 22    |
| 409.6588 | 14.75 | 409.6688 | 20.5  |
| 409.69   | 17    | 409.7025 | 22.75 |
| 409.7238 | 16    | 409.7363 | 22.75 |
| 409.7588 | 17    | 409.7688 | 24.5  |
| 409.7913 | 14.5  | 409.8075 | 28.25 |
| 409.8238 | 15    | 409.8413 | 23    |
| 409.86   | 15.75 | 409.8738 | 22.25 |
| 409.8913 | 17.25 | 409.905  | 25.25 |
| 409.9225 | 18.5  | 409.9363 | 21    |
| 409.9563 | 19.25 | 409.9688 | 24.75 |
| 409.9938 | 18.5  | 410.0025 | 26.25 |
| 410.025  | 14.25 | 410.0388 | 25.25 |
| 410.0575 | 19.25 | 410.0738 | 28    |

|          |       |
|----------|-------|
| 410.09   | 17    |
| 410.1275 | 15.5  |
| 410.1588 | 18.25 |
| 410.19   | 16.5  |
| 410.2238 | 14.75 |
| 410.2588 | 17.5  |
| 410.2913 | 16    |
| 410.3238 | 14.75 |
| 410.36   | 17.5  |
| 410.3913 | 17.25 |
| 410.4225 | 16.25 |
| 410.4563 | 20.25 |
| 410.4938 | 15.5  |
| 410.525  | 20    |
| 410.555  | 18.25 |
| 410.59   | 18.25 |
| 410.6275 | 19.75 |
| 410.66   | 20.5  |
| 410.6888 | 16.75 |
| 410.7238 | 16.25 |
| 410.7588 | 15.75 |
| 410.7913 | 19.25 |
| 410.8263 | 16    |
| 410.86   | 15.5  |
| 410.8938 | 13.75 |
| 410.9225 | 13    |
| 410.9563 | 12.75 |
| 410.9938 | 12.25 |
| 411.025  | 16.75 |
| 411.055  | 11.75 |
| 411.0925 | 10.5  |
| 411.1275 | 12.25 |
| 411.1588 | 11.5  |
| 411.1888 | 11.5  |
| 411.2238 | 10    |
| 411.26   | 13    |
| 411.2913 | 14    |
| 411.3238 | 11.25 |
| 411.36   | 10.75 |
| 411.3913 | 10.25 |
| 411.425  | 13.25 |
| 411.4563 | 10.25 |
| 411.495  | 10.25 |
| 411.525  | 12.25 |
| 411.555  | 11.25 |
| 411.5925 | 12.75 |
| 411.6275 | 10.75 |
| 411.6588 | 12    |
| 411.6888 | 10    |
| 411.7238 | 9     |

|          |       |
|----------|-------|
| 410.1063 | 23.75 |
| 410.1375 | 29.75 |
| 410.1688 | 22.5  |
| 410.2025 | 27    |
| 410.2338 | 28    |
| 410.2688 | 25.25 |
| 410.305  | 25    |
| 410.3413 | 22.75 |
| 410.3738 | 25    |
| 410.405  | 22.75 |
| 410.4363 | 23    |
| 410.4688 | 23    |
| 410.5025 | 21.5  |
| 410.5388 | 19.5  |
| 410.5738 | 23    |
| 410.6063 | 22.25 |
| 410.6375 | 19.25 |
| 410.6713 | 21.75 |
| 410.7025 | 24.5  |
| 410.7338 | 21    |
| 410.7688 | 18.75 |
| 410.805  | 16.5  |
| 410.8413 | 19.25 |
| 410.8775 | 19.75 |
| 410.905  | 17.5  |
| 410.935  | 20.75 |
| 410.9688 | 21.5  |
| 411.0025 | 24.25 |
| 411.0388 | 19.75 |
| 411.0738 | 22.5  |
| 411.1063 | 23.25 |
| 411.1375 | 19.75 |
| 411.1688 | 22.75 |
| 411.2025 | 21.75 |
| 411.2338 | 22.75 |
| 411.2675 | 23.75 |
| 411.305  | 21    |
| 411.34   | 24    |
| 411.3738 | 25.25 |
| 411.405  | 27.75 |
| 411.435  | 26.25 |
| 411.4688 | 20    |
| 411.5025 | 24.5  |
| 411.5388 | 21.5  |
| 411.5738 | 26.5  |
| 411.6063 | 27.25 |
| 411.64   | 28.25 |
| 411.6713 | 24.75 |
| 411.705  | 24.5  |
| 411.735  | 26.5  |

|          |       |          |       |
|----------|-------|----------|-------|
| 411.7588 | 11.25 | 411.7713 | 23.25 |
| 411.7913 | 14.5  | 411.8088 | 21.75 |
| 411.8238 | 11    | 411.8425 | 28.75 |
| 411.8613 | 10.25 | 411.875  | 25.5  |
| 411.8913 | 11.5  | 411.9063 | 23    |
| 411.9225 | 11.5  | 411.9363 | 23    |
| 411.9563 | 9.75  | 411.9713 | 30    |
| 411.995  | 14    | 412.005  | 18    |
| 412.025  | 13.5  | 412.04   | 19.5  |
| 412.055  | 11.75 | 412.075  | 18    |
| 412.0925 | 12    | 412.1088 | 21.5  |
| 412.1275 | 12.75 | 412.14   | 21.5  |
| 412.1588 | 13    | 412.1713 | 17.5  |
| 412.1888 | 12.25 | 412.205  | 23.75 |
| 412.2238 | 13    | 412.235  | 21.75 |
| 412.2588 | 16.75 | 412.2738 | 23    |
| 412.2913 | 12.5  | 412.3088 | 22.5  |
| 412.3238 | 12    | 412.3425 | 15    |
| 412.3613 | 10.75 | 412.375  | 22    |
| 412.3913 | 9     | 412.4063 | 18.25 |
| 412.4225 | 14.75 | 412.4363 | 20.75 |
| 412.4613 | 11.25 | 412.4713 | 21.75 |
| 412.495  | 10.5  | 412.505  | 20    |
| 412.525  | 11.25 | 412.54   | 20    |
| 412.555  | 14    | 412.575  | 23.5  |
| 412.5925 | 11.75 | 412.6088 | 23.5  |
| 412.6275 | 9.5   | 412.64   | 21.5  |
| 412.6588 | 11    | 412.6713 | 21.5  |
| 412.6888 | 10.75 | 412.705  | 22.5  |
| 412.7238 | 11.75 | 412.735  | 23.75 |
| 412.7588 | 13.75 | 412.7713 | 21    |
| 412.7913 | 12    | 412.8088 | 19    |
| 412.8263 | 10.5  | 412.8425 | 19.5  |
| 412.8613 | 11.25 | 412.875  | 18.25 |
| 412.8913 | 13.75 | 412.9063 | 22.75 |
| 412.9225 | 11.75 | 412.9363 | 18    |
| 412.9563 | 13.75 | 412.9713 | 19.25 |
| 412.995  | 10.25 | 413.005  | 22.25 |
| 413.025  | 11.5  | 413.0388 | 23.75 |
| 413.055  | 11.75 | 413.075  | 22.75 |
| 413.0925 | 15.75 | 413.1063 | 21.25 |
| 413.1275 | 12    | 413.14   | 23    |
| 413.1588 | 10.75 | 413.1713 | 19.75 |
| 413.1888 | 11.5  | 413.205  | 19.75 |
| 413.2238 | 9.5   | 413.235  | 18.75 |
| 413.2588 | 11    | 413.2688 | 19    |
| 413.2913 | 11.75 | 413.3088 | 18    |
| 413.3263 | 10    | 413.3425 | 21.5  |
| 413.3613 | 10.25 | 413.375  | 21.25 |
| 413.3913 | 12.75 | 413.4063 | 20    |



|          |       |
|----------|-------|
| 413.4225 | 13    |
| 413.4563 | 10.75 |
| 413.495  | 10.75 |
| 413.525  | 11    |
| 413.555  | 10.75 |
| 413.5925 | 13.5  |
| 413.6275 | 11.5  |
| 413.6625 | 11.25 |
| 413.6888 | 11.25 |
| 413.7238 | 13.25 |
| 413.7588 | 14.25 |
| 413.7913 | 13.25 |
| 413.8263 | 16.25 |
| 413.8613 | 10    |
| 413.8913 | 13.75 |
| 413.9225 | 10.75 |
| 413.9563 | 12.25 |
| 413.995  | 10.75 |
| 414.025  | 13.5  |
| 414.0563 | 12    |
| 414.095  | 12.5  |
| 414.1275 | 13    |
| 414.1588 | 9.5   |
| 414.1888 | 14    |
| 414.2238 | 12.5  |
| 414.2588 | 13.25 |
| 414.2913 | 12.25 |
| 414.3263 | 12.25 |
| 414.3613 | 14.25 |
| 414.3913 | 12.5  |
| 414.4225 | 13    |
| 414.4563 | 12.5  |
| 414.495  | 13.25 |
| 414.525  | 11.75 |
| 414.5563 | 13    |
| 414.595  | 16.75 |
| 414.6275 | 13    |
| 414.6588 | 14    |
| 414.6888 | 11.75 |
| 414.7263 | 13    |
| 414.7588 | 11.75 |
| 414.7913 | 13.5  |
| 414.8263 | 10.75 |
| 414.8613 | 8.75  |
| 414.8913 | 12.75 |
| 414.9225 | 14.5  |
| 414.9588 | 13.5  |
| 414.9938 | 13    |
| 415.025  | 11.25 |
| 415.0563 | 14.75 |

|          |       |
|----------|-------|
| 413.4363 | 23    |
| 413.4713 | 20.5  |
| 413.505  | 19    |
| 413.5388 | 18.25 |
| 413.575  | 18.75 |
| 413.6063 | 20    |
| 413.64   | 21.75 |
| 413.6713 | 21.75 |
| 413.705  | 18.5  |
| 413.735  | 21.25 |
| 413.7688 | 18.5  |
| 413.8088 | 19    |
| 413.8425 | 18.25 |
| 413.875  | 17.75 |
| 413.9063 | 22    |
| 413.9363 | 22.25 |
| 413.9713 | 22.75 |
| 414.005  | 28    |
| 414.0388 | 16.5  |
| 414.075  | 20.75 |
| 414.1063 | 23.75 |
| 414.14   | 16.75 |
| 414.1713 | 23    |
| 414.2025 | 23.5  |
| 414.235  | 24.25 |
| 414.2688 | 22.75 |
| 414.3113 | 20.25 |
| 414.3425 | 23.75 |
| 414.3738 | 20    |
| 414.4063 | 21    |
| 414.4363 | 26.25 |
| 414.4713 | 24    |
| 414.505  | 20.5  |
| 414.5388 | 22    |
| 414.575  | 22    |
| 414.6063 | 21.75 |
| 414.6425 | 25    |
| 414.6713 | 24.75 |
| 414.7025 | 26    |
| 414.735  | 21.5  |
| 414.7688 | 23.75 |
| 414.8113 | 24.5  |
| 414.8425 | 21.75 |
| 414.8738 | 19.25 |
| 414.9063 | 25.75 |
| 414.9363 | 21    |
| 414.9713 | 16.75 |
| 415.005  | 22    |
| 415.0413 | 21    |
| 415.075  | 20.25 |

|          |       |
|----------|-------|
| 415.0975 | 8.75  |
| 415.1275 | 13.25 |
| 415.1588 | 11.5  |
| 415.1888 | 11.25 |
| 415.2238 | 11.25 |
| 415.2588 | 13.25 |
| 415.2938 | 14.5  |
| 415.3288 | 12.5  |
| 415.3613 | 13.75 |
| 415.3913 | 14.25 |
| 415.4225 | 19.5  |
| 415.4588 | 13.75 |
| 415.495  | 14    |
| 415.525  | 13.5  |
| 415.5563 | 14.25 |
| 415.595  | 15.25 |
| 415.6275 | 11.5  |
| 415.6588 | 12    |
| 415.69   | 8.75  |
| 415.7238 | 12.75 |
| 415.7588 | 12.5  |
| 415.7938 | 12.5  |
| 415.8263 | 12.5  |
| 415.8613 | 17.25 |
| 415.8913 | 14    |
| 415.9263 | 12    |
| 415.9588 | 14.5  |
| 415.9938 | 13.75 |
| 416.025  | 14    |
| 416.0563 | 13.25 |
| 416.0975 | 17.5  |
| 416.1275 | 13.75 |
| 416.1588 | 18    |
| 416.1913 | 10.75 |
| 416.2238 | 15.25 |
| 416.2588 | 16.25 |
| 416.2938 | 17.25 |
| 416.3288 | 12    |
| 416.3613 | 15.5  |
| 416.3913 | 17    |
| 416.4225 | 18    |
| 416.4588 | 19    |
| 416.4938 | 15.75 |
| 416.525  | 16.75 |
| 416.5563 | 13.75 |
| 416.5975 | 11.25 |
| 416.6275 | 12.5  |
| 416.6588 | 17    |
| 416.6913 | 15.25 |
| 416.7238 | 12    |

|          |       |
|----------|-------|
| 415.1063 | 15.5  |
| 415.14   | 21    |
| 415.1713 | 15.25 |
| 415.2025 | 18    |
| 415.235  | 22.5  |
| 415.2688 | 19.5  |
| 415.3113 | 21.25 |
| 415.3425 | 20.5  |
| 415.3738 | 22.25 |
| 415.4063 | 18.25 |
| 415.4363 | 24.5  |
| 415.4713 | 22.25 |
| 415.505  | 19    |
| 415.54   | 22.75 |
| 415.575  | 23.75 |
| 415.6088 | 25.5  |
| 415.64   | 21.25 |
| 415.6713 | 21.5  |
| 415.7025 | 23.5  |
| 415.735  | 19.25 |
| 415.7688 | 18.5  |
| 415.8113 | 27.25 |
| 415.8425 | 21.25 |
| 415.8738 | 26.25 |
| 415.9063 | 16.75 |
| 415.9363 | 19.5  |
| 415.9688 | 24    |
| 416.005  | 20.5  |
| 416.04   | 19.25 |
| 416.075  | 21.5  |
| 416.1063 | 20    |
| 416.1375 | 25.25 |
| 416.1713 | 20    |
| 416.2025 | 20.25 |
| 416.235  | 21    |
| 416.2688 | 27.25 |
| 416.3113 | 17    |
| 416.345  | 20    |
| 416.3738 | 21.25 |
| 416.4063 | 21.5  |
| 416.4363 | 19.5  |
| 416.4688 | 18.75 |
| 416.505  | 22.5  |
| 416.54   | 19    |
| 416.575  | 24    |
| 416.6063 | 19.5  |
| 416.6375 | 18.75 |
| 416.6713 | 23.25 |
| 416.7025 | 22.75 |
| 416.7375 | 23.75 |

|          |       |
|----------|-------|
| 416.7563 | 19    |
| 416.7938 | 14.5  |
| 416.8275 | 14.75 |
| 416.8613 | 12.5  |
| 416.8913 | 18    |
| 416.925  | 13    |
| 416.9588 | 12    |
| 416.9913 | 14    |
| 417.0263 | 14.25 |
| 417.0563 | 16.25 |
| 417.0975 | 15.5  |
| 417.1275 | 14.75 |
| 417.1588 | 13.75 |
| 417.1913 | 16.25 |
| 417.2238 | 16.25 |
| 417.2563 | 15.75 |
| 417.2938 | 15.5  |
| 417.3275 | 15    |
| 417.3613 | 14    |
| 417.3913 | 12.5  |
| 417.4225 | 14.5  |
| 417.4588 | 16    |
| 417.4913 | 14.75 |
| 417.5288 | 14.75 |
| 417.5563 | 16.5  |
| 417.5975 | 16.5  |
| 417.63   | 16.75 |
| 417.6588 | 20    |
| 417.6938 | 21    |
| 417.7238 | 19.25 |
| 417.7563 | 16.75 |
| 417.7938 | 18.5  |
| 417.8275 | 16    |
| 417.8613 | 18    |
| 417.8913 | 17.25 |
| 417.9225 | 14    |
| 417.9588 | 14.75 |
| 417.9913 | 17.75 |
| 418.0263 | 13.75 |
| 418.0563 | 15.25 |
| 418.0975 | 14.5  |
| 418.1275 | 17.5  |
| 418.1588 | 17    |
| 418.1913 | 12.25 |
| 418.2238 | 16.75 |
| 418.2588 | 17.75 |
| 418.2938 | 17    |
| 418.325  | 18.75 |
| 418.3613 | 16    |
| 418.3913 | 16    |

|          |       |
|----------|-------|
| 416.7688 | 23.25 |
| 416.8113 | 21.75 |
| 416.8425 | 21.25 |
| 416.8738 | 22    |
| 416.9063 | 19.25 |
| 416.9363 | 20.25 |
| 416.9688 | 20.75 |
| 417.005  | 22    |
| 417.04   | 20.25 |
| 417.075  | 23    |
| 417.1063 | 23.5  |
| 417.1375 | 22.75 |
| 417.1713 | 21    |
| 417.2025 | 23    |
| 417.235  | 20.75 |
| 417.2688 | 23    |
| 417.3113 | 23.5  |
| 417.3425 | 22    |
| 417.3738 | 24.25 |
| 417.4038 | 23.25 |
| 417.4363 | 20.75 |
| 417.4688 | 22.25 |
| 417.505  | 23.75 |
| 417.54   | 21.25 |
| 417.575  | 19    |
| 417.6063 | 24.75 |
| 417.6375 | 20.25 |
| 417.6713 | 21.5  |
| 417.7025 | 24.5  |
| 417.735  | 21.5  |
| 417.77   | 24.5  |
| 417.8125 | 22.25 |
| 417.8425 | 24    |
| 417.8738 | 19.75 |
| 417.9038 | 22.5  |
| 417.9363 | 23.75 |
| 417.9688 | 21.75 |
| 418.005  | 25.5  |
| 418.04   | 27.75 |
| 418.075  | 28    |
| 418.1063 | 27.75 |
| 418.1375 | 30.5  |
| 418.1713 | 21.5  |
| 418.2025 | 19.5  |
| 418.2338 | 27.25 |
| 418.2688 | 27.25 |
| 418.3088 | 24.5  |
| 418.3425 | 24    |
| 418.3738 | 27.75 |
| 418.4038 | 29    |

|          |       |          |       |
|----------|-------|----------|-------|
| 418.425  | 18.5  | 418.4363 | 28.25 |
| 418.4588 | 15    | 418.4713 | 26.75 |
| 418.4913 | 19.75 | 418.505  | 25    |
| 418.525  | 15.25 | 418.54   | 26.5  |
| 418.5563 | 17.25 | 418.575  | 23.25 |
| 418.5975 | 20.25 | 418.6063 | 26.25 |
| 418.6275 | 18.5  | 418.6375 | 22    |
| 418.6588 | 18.25 | 418.67   | 24    |
| 418.6913 | 19.75 | 418.7025 | 27    |
| 418.7263 | 18.25 | 418.735  | 26    |
| 418.7588 | 18    | 418.7688 | 21    |
| 418.7938 | 15.75 | 418.8088 | 23.25 |
| 418.825  | 18    | 418.8425 | 24.5  |
| 418.8613 | 16.25 | 418.8738 | 20.5  |
| 418.8913 | 15.5  | 418.9038 | 28.5  |
| 418.9275 | 15.5  | 418.9363 | 26.25 |
| 418.9588 | 15    | 418.9688 | 22.25 |
| 418.9913 | 17.25 | 419.005  | 23.75 |
| 419.025  | 14.5  | 419.0413 | 20.5  |
| 419.0563 | 14    | 419.075  | 21.25 |
| 419.0975 | 16.5  | 419.1063 | 26.75 |
| 419.1275 | 15    | 419.1375 | 21.25 |
| 419.1588 | 17    | 419.17   | 19.75 |
| 419.1938 | 18.25 | 419.2025 | 23.25 |
| 419.2263 | 13.25 | 419.235  | 18    |
| 419.2613 | 15    | 419.2688 | 21.25 |
| 419.295  | 15    | 419.3063 | 21.25 |
| 419.3263 | 16.5  | 419.3425 | 17    |
| 419.3625 | 19    | 419.3738 | 18.25 |
| 419.3938 | 14.25 | 419.4038 | 18.25 |
| 419.4288 | 12.5  | 419.4363 | 16.25 |
| 419.46   | 15.5  | 419.4688 | 18.25 |
| 419.4925 | 14.25 | 419.505  | 19.5  |
| 419.5275 | 15.75 | 419.5388 | 19.25 |
| 419.5588 | 14.25 | 419.575  | 19.25 |
| 419.6    | 17.5  | 419.6063 | 19.5  |
| 419.63   | 13.75 | 419.6375 | 25.25 |
| 419.6625 | 15    | 419.67   | 21    |
| 419.6938 | 10    | 419.7025 | 19.5  |
| 419.7263 | 12.25 | 419.735  | 18    |
| 419.7613 | 13.5  | 419.7688 | 25.25 |
| 419.795  | 12    | 419.8063 | 20    |
| 419.8263 | 10.75 | 419.8425 | 19    |
| 419.8625 | 16    | 419.8738 | 19.75 |
| 419.8938 | 12    | 419.9038 | 21.5  |
| 419.9288 | 15    | 419.9338 | 17.5  |
| 419.96   | 13.5  | 419.9688 | 19.75 |
| 419.9925 | 13.75 | 420.005  | 23    |
| 420.0275 | 12.25 | 420.0388 | 22.25 |
| 420.0588 | 15.25 | 420.075  | 21.75 |

|          |       |
|----------|-------|
| 420.1    | 12.5  |
| 420.13   | 11.75 |
| 420.1638 | 12    |
| 420.1938 | 13.5  |
| 420.2263 | 13.5  |
| 420.2613 | 14.5  |
| 420.295  | 11.75 |
| 420.3263 | 11.25 |
| 420.3625 | 13.75 |
| 420.3938 | 14.75 |
| 420.4288 | 11    |
| 420.46   | 11.75 |
| 420.4938 | 9.5   |
| 420.5288 | 11    |
| 420.5613 | 9.25  |
| 420.6    | 9.5   |
| 420.63   | 8.75  |
| 420.6638 | 10.25 |
| 420.6938 | 14.25 |
| 420.7263 | 14.25 |
| 420.76   | 13.5  |
| 420.795  | 13    |
| 420.8263 | 8     |
| 420.8625 | 8     |
| 420.8938 | 9.25  |
| 420.9288 | 13    |
| 420.96   | 13.5  |
| 420.9938 | 13    |
| 421.0275 | 12.25 |
| 421.0613 | 14.5  |
| 421.0988 | 13.25 |
| 421.13   | 11    |
| 421.1663 | 15.75 |
| 421.1938 | 15    |
| 421.2263 | 17.75 |
| 421.26   | 18.25 |
| 421.295  | 14.5  |
| 421.3263 | 16.25 |
| 421.3625 | 19.25 |
| 421.3938 | 17    |
| 421.4288 | 21.5  |
| 421.46   | 18.25 |
| 421.4938 | 21.25 |
| 421.5275 | 17.5  |
| 421.5613 | 18.25 |
| 421.5988 | 15.25 |
| 421.63   | 18.5  |
| 421.6638 | 12.5  |
| 421.6938 | 14.25 |
| 421.7288 | 15.25 |

|          |       |
|----------|-------|
| 420.1063 | 20    |
| 420.1375 | 24.75 |
| 420.17   | 20.25 |
| 420.2025 | 18.25 |
| 420.235  | 21.5  |
| 420.2688 | 20.5  |
| 420.3063 | 22.5  |
| 420.3425 | 22.25 |
| 420.3738 | 19.5  |
| 420.4038 | 21    |
| 420.4338 | 21.25 |
| 420.4688 | 18.5  |
| 420.5025 | 17    |
| 420.5388 | 18.5  |
| 420.575  | 18.5  |
| 420.6063 | 15.25 |
| 420.6375 | 17    |
| 420.67   | 17.25 |
| 420.7025 | 14.75 |
| 420.735  | 18    |
| 420.7688 | 17.25 |
| 420.8063 | 18.5  |
| 420.8425 | 14.75 |
| 420.8738 | 18    |
| 420.9038 | 19    |
| 420.9338 | 15.75 |
| 420.9688 | 15.5  |
| 421.0025 | 14.5  |
| 421.0388 | 20    |
| 421.075  | 21    |
| 421.1063 | 16    |
| 421.1375 | 21    |
| 421.17   | 18.75 |
| 421.2013 | 19.5  |
| 421.235  | 19.75 |
| 421.2688 | 18.75 |
| 421.3063 | 21.25 |
| 421.3425 | 20.25 |
| 421.3738 | 19.5  |
| 421.4038 | 17.75 |
| 421.4338 | 20.25 |
| 421.4713 | 19.25 |
| 421.5025 | 20    |
| 421.5388 | 19.25 |
| 421.575  | 20.25 |
| 421.6063 | 15.25 |
| 421.6375 | 19.5  |
| 421.67   | 18    |
| 421.7013 | 19.5  |
| 421.735  | 17.25 |

|          |       |
|----------|-------|
| 421.76   | 17.5  |
| 421.7925 | 13.5  |
| 421.8263 | 14.5  |
| 421.8625 | 14    |
| 421.8963 | 13.75 |
| 421.9288 | 13    |
| 421.96   | 15.75 |
| 421.9938 | 14.75 |
| 422.0275 | 12.75 |
| 422.0613 | 17    |
| 422.1    | 18    |
| 422.13   | 15.25 |
| 422.1638 | 13    |
| 422.1938 | 8.25  |
| 422.2263 | 14    |
| 422.26   | 14    |
| 422.2925 | 15.5  |
| 422.3288 | 13.5  |
| 422.3625 | 14.75 |
| 422.3963 | 14.25 |
| 422.4288 | 16    |
| 422.46   | 14    |
| 422.4938 | 16    |
| 422.5275 | 14    |
| 422.5638 | 16.5  |
| 422.6025 | 13.25 |
| 422.6325 | 15.5  |
| 422.6663 | 14.75 |
| 422.6963 | 14.75 |
| 422.73   | 15    |
| 422.7613 | 14.75 |
| 422.7938 | 11    |
| 422.8288 | 16.25 |
| 422.8638 | 15    |
| 422.8975 | 11.25 |
| 422.93   | 18.5  |
| 422.9625 | 14.25 |
| 422.9963 | 14    |
| 423.0275 | 15.75 |
| 423.0638 | 15.75 |
| 423.1    | 15.5  |
| 423.1325 | 16.25 |
| 423.1663 | 16.5  |
| 423.1963 | 14.25 |
| 423.23   | 15    |
| 423.2613 | 13.5  |
| 423.2938 | 14.25 |
| 423.3288 | 15.25 |
| 423.3638 | 9.75  |
| 423.3975 | 14.5  |

|          |       |
|----------|-------|
| 421.7688 | 19    |
| 421.8063 | 17.5  |
| 421.8425 | 16.75 |
| 421.8738 | 18    |
| 421.9038 | 15    |
| 421.9338 | 16    |
| 421.9713 | 20.75 |
| 422.0025 | 21.75 |
| 422.0388 | 12.75 |
| 422.075  | 15.75 |
| 422.1063 | 17.75 |
| 422.1375 | 18.75 |
| 422.17   | 20    |
| 422.2013 | 20.5  |
| 422.235  | 18.75 |
| 422.2688 | 17.5  |
| 422.3063 | 16.75 |
| 422.3425 | 19    |
| 422.3738 | 15.75 |
| 422.4038 | 14.25 |
| 422.4338 | 13    |
| 422.4713 | 17.25 |
| 422.5025 | 15.75 |
| 422.5388 | 15    |
| 422.575  | 15.25 |
| 422.6063 | 16.5  |
| 422.6375 | 15    |
| 422.67   | 15.5  |
| 422.7013 | 19    |
| 422.735  | 18    |
| 422.77   | 16.75 |
| 422.8038 | 17    |
| 422.8425 | 14.5  |
| 422.8738 | 18.25 |
| 422.9038 | 20.25 |
| 422.9338 | 19.75 |
| 422.9713 | 14.5  |
| 423.0025 | 16.25 |
| 423.0388 | 20.5  |
| 423.075  | 18.75 |
| 423.1063 | 15    |
| 423.1375 | 15.75 |
| 423.17   | 18.25 |
| 423.2013 | 17.25 |
| 423.235  | 18    |
| 423.27   | 15.5  |
| 423.3038 | 20    |
| 423.3425 | 17.75 |
| 423.3738 | 17.5  |
| 423.4038 | 14.75 |

|          |       |          |       |
|----------|-------|----------|-------|
| 423.43   | 12.75 | 423.4338 | 13.5  |
| 423.4625 | 14.25 | 423.4688 | 17.75 |
| 423.4963 | 16    | 423.5025 | 19.5  |
| 423.5288 | 12.25 | 423.5388 | 16    |
| 423.5638 | 13.25 | 423.575  | 20.5  |
| 423.6    | 15.75 | 423.6063 | 19.25 |
| 423.6325 | 10.75 | 423.6375 | 18.25 |
| 423.6663 | 13.25 | 423.67   | 16.5  |
| 423.6963 | 12    | 423.7013 | 13.5  |
| 423.73   | 14.25 | 423.735  | 17.75 |
| 423.7613 | 12.75 | 423.7713 | 21.25 |
| 423.7938 | 14.75 | 423.8038 | 17.25 |
| 423.8288 | 14.5  | 423.8425 | 17.25 |
| 423.8638 | 13.75 | 423.8763 | 16.75 |
| 423.8975 | 15.25 | 423.9038 | 20.75 |
| 423.93   | 16.5  | 423.9338 | 16.75 |
| 423.9625 | 17.25 | 423.9688 | 18.5  |
| 423.9963 | 14.75 | 424.0025 | 18.75 |
| 424.0275 | 14.75 | 424.0388 | 16.5  |
| 424.0638 | 14.75 | 424.075  | 20.25 |
| 424.1    | 19    | 424.1063 | 15    |
| 424.1338 | 11.75 | 424.1375 | 18.25 |
| 424.1688 | 20    | 424.17   | 15.25 |
| 424.1963 | 14.5  | 424.2025 | 17.5  |
| 424.23   | 13.75 | 424.235  | 11.5  |
| 424.2613 | 18.25 | 424.27   | 17.25 |
| 424.2938 | 15.25 | 424.3038 | 17.75 |
| 424.3288 | 12    | 424.3425 | 17    |
| 424.3638 | 21.5  | 424.3738 | 18.25 |
| 424.3975 | 14.25 | 424.4038 | 17    |
| 424.43   | 15.75 | 424.4338 | 19.5  |
| 424.4625 | 14.25 | 424.4688 | 18.25 |
| 424.4963 | 13.5  | 424.5025 | 16.25 |
| 424.5275 | 17    | 424.5388 | 19.75 |
| 424.5638 | 17.25 | 424.575  | 20.25 |
| 424.6    | 17    | 424.6063 | 19.75 |
| 424.6338 | 16.75 | 424.6375 | 20.25 |
| 424.6663 | 14.75 | 424.67   | 18.5  |
| 424.6963 | 14    | 424.705  | 20.5  |
| 424.73   | 13.25 | 424.7363 | 18.5  |
| 424.7613 | 13.5  | 424.7738 | 17.5  |
| 424.7938 | 14    | 424.8063 | 16    |
| 424.8288 | 16.75 | 424.8438 | 18.75 |
| 424.8638 | 15    | 424.875  | 14.75 |
| 424.8975 | 19    | 424.905  | 18.75 |
| 424.93   | 14.25 | 424.935  | 18    |
| 424.9638 | 16.5  | 424.9713 | 16.75 |
| 424.9963 | 18.75 | 425.005  | 14    |
| 425.0275 | 15    | 425.04   | 14.5  |
| 425.0638 | 18.5  | 425.0775 | 20.25 |

|          |       |
|----------|-------|
| 425.0975 | 18.75 |
| 425.1338 | 17.25 |
| 425.1663 | 16.25 |
| 425.1963 | 15    |
| 425.23   | 13.75 |
| 425.2613 | 15    |
| 425.2938 | 15.25 |
| 425.3288 | 13.5  |
| 425.3638 | 14.25 |
| 425.3975 | 11    |
| 425.43   | 11.25 |
| 425.4638 | 16.5  |
| 425.4963 | 16    |
| 425.5275 | 15    |
| 425.5638 | 14    |
| 425.5975 | 18    |
| 425.6338 | 15.75 |
| 425.6663 | 17.25 |
| 425.6963 | 17.5  |
| 425.73   | 14.5  |
| 425.7613 | 13.75 |
| 425.7938 | 18    |
| 425.8288 | 18.5  |
| 425.8625 | 18.25 |
| 425.8975 | 13.75 |
| 425.93   | 16.75 |
| 425.9638 | 12.25 |
| 425.9963 | 15.75 |
| 426.03   | 14.5  |
| 426.0638 | 17    |
| 426.0975 | 17.5  |
| 426.1338 | 19.5  |
| 426.1663 | 16.75 |
| 426.1963 | 20    |
| 426.23   | 16    |
| 426.2613 | 16.5  |
| 426.295  | 14    |
| 426.3288 | 12    |
| 426.3625 | 13    |
| 426.4    | 18.75 |
| 426.43   | 15.75 |
| 426.4638 | 14.5  |
| 426.4963 | 12.75 |
| 426.5275 | 15.25 |
| 426.5638 | 13.25 |
| 426.5975 | 12.25 |
| 426.6338 | 14.5  |
| 426.6663 | 14.75 |
| 426.6963 | 17.25 |
| 426.73   | 19.5  |

|          |       |
|----------|-------|
| 425.1088 | 16.75 |
| 425.14   | 19.5  |
| 425.1725 | 17.25 |
| 425.205  | 19.25 |
| 425.2363 | 15.5  |
| 425.2738 | 13.25 |
| 425.3063 | 16    |
| 425.3438 | 19.5  |
| 425.375  | 19.25 |
| 425.405  | 16.5  |
| 425.435  | 16.5  |
| 425.4713 | 17.5  |
| 425.505  | 18.75 |
| 425.54   | 17    |
| 425.5775 | 18    |
| 425.6088 | 17.75 |
| 425.64   | 17    |
| 425.6725 | 13.5  |
| 425.705  | 22    |
| 425.7363 | 16    |
| 425.7713 | 21.25 |
| 425.8063 | 17.25 |
| 425.8438 | 14.75 |
| 425.875  | 15.75 |
| 425.905  | 15    |
| 425.935  | 19    |
| 425.9713 | 19.25 |
| 426.005  | 16.75 |
| 426.04   | 17    |
| 426.0763 | 14    |
| 426.1088 | 15.5  |
| 426.14   | 15.75 |
| 426.1725 | 13.75 |
| 426.205  | 19.25 |
| 426.2363 | 18    |
| 426.2713 | 18    |
| 426.3063 | 13.75 |
| 426.3438 | 16.75 |
| 426.375  | 17    |
| 426.405  | 17    |
| 426.435  | 17.5  |
| 426.4713 | 15    |
| 426.5063 | 19    |
| 426.54   | 20.25 |
| 426.5763 | 14.5  |
| 426.6088 | 17    |
| 426.64   | 17.25 |
| 426.6725 | 18    |
| 426.705  | 18.25 |
| 426.7363 | 20.25 |



|          |       |
|----------|-------|
| 426.7613 | 17.75 |
| 426.7938 | 17.25 |
| 426.8288 | 24    |
| 426.8625 | 17.5  |
| 426.8988 | 17.75 |
| 426.93   | 14.75 |
| 426.9638 | 18    |
| 426.9975 | 19.5  |
| 427.0275 | 22    |
| 427.06   | 18.75 |
| 427.0975 | 20.25 |
| 427.1338 | 19.5  |
| 427.1663 | 18.25 |
| 427.1988 | 19    |
| 427.23   | 20.25 |
| 427.2613 | 16.25 |
| 427.2938 | 20    |
| 427.3288 | 18.25 |
| 427.365  | 16.75 |
| 427.3975 | 15.5  |
| 427.43   | 19    |
| 427.4638 | 20    |
| 427.4963 | 17    |
| 427.5275 | 16.5  |
| 427.56   | 18.25 |
| 427.5988 | 19.5  |
| 427.6338 | 15.25 |
| 427.6663 | 19.75 |
| 427.6988 | 17.75 |
| 427.73   | 13.75 |
| 427.7613 | 16.5  |
| 427.7938 | 21.25 |
| 427.8288 | 15.25 |
| 427.865  | 16.75 |
| 427.8975 | 18    |
| 427.93   | 16.25 |
| 427.9638 | 16.75 |
| 427.9963 | 15.25 |
| 428.0275 | 16.75 |
| 428.06   | 14.75 |
| 428.0988 | 12.25 |
| 428.1338 | 18    |
| 428.1663 | 13    |
| 428.2    | 16.5  |
| 428.23   | 19.25 |
| 428.2613 | 20.75 |
| 428.2938 | 16.25 |
| 428.3275 | 15.75 |
| 428.365  | 10    |
| 428.3975 | 14.75 |

|          |       |
|----------|-------|
| 426.7713 | 18    |
| 426.8063 | 18    |
| 426.8438 | 17.5  |
| 426.875  | 19    |
| 426.905  | 22    |
| 426.9375 | 17.75 |
| 426.9713 | 17.25 |
| 427.0063 | 17.25 |
| 427.0425 | 17    |
| 427.0763 | 19.25 |
| 427.1088 | 17.75 |
| 427.14   | 18    |
| 427.1725 | 18.5  |
| 427.205  | 17    |
| 427.2388 | 19    |
| 427.2738 | 16.75 |
| 427.31   | 21.75 |
| 427.3463 | 19.25 |
| 427.3775 | 17.5  |
| 427.4075 | 19.5  |
| 427.44   | 15.5  |
| 427.4725 | 16.5  |
| 427.5075 | 13.75 |
| 427.5413 | 19    |
| 427.5788 | 14.5  |
| 427.61   | 16.25 |
| 427.6413 | 17.5  |
| 427.6738 | 18.5  |
| 427.7075 | 17.25 |
| 427.7388 | 16.75 |
| 427.7738 | 18    |
| 427.81   | 16.25 |
| 427.8463 | 12.75 |
| 427.8775 | 19.5  |
| 427.9075 | 19.25 |
| 427.94   | 13    |
| 427.9725 | 14.75 |
| 428.0075 | 16    |
| 428.0413 | 15.5  |
| 428.0788 | 15.25 |
| 428.11   | 15.25 |
| 428.1413 | 16.25 |
| 428.1738 | 14.25 |
| 428.2075 | 19.5  |
| 428.2388 | 15.75 |
| 428.2738 | 14.75 |
| 428.31   | 15    |
| 428.3438 | 17.5  |
| 428.3775 | 19.25 |
| 428.4075 | 15.25 |

|          |       |
|----------|-------|
| 428.43   | 17.75 |
| 428.4638 | 13.25 |
| 428.4963 | 17.75 |
| 428.5275 | 15.75 |
| 428.56   | 20.75 |
| 428.5975 | 17.75 |
| 428.6313 | 16    |
| 428.6638 | 16.5  |
| 428.6988 | 17.25 |
| 428.73   | 17    |
| 428.7613 | 16.5  |
| 428.7975 | 17.25 |
| 428.8275 | 15.75 |
| 428.865  | 13    |
| 428.8975 | 13    |
| 428.93   | 17.5  |
| 428.9638 | 17.25 |
| 428.9963 | 14    |
| 429.0275 | 16.25 |
| 429.06   | 13.25 |
| 429.0975 | 17.75 |
| 429.1313 | 17.25 |
| 429.1638 | 16    |
| 429.1988 | 13    |
| 429.23   | 12    |
| 429.2613 | 12.5  |
| 429.2938 | 15.25 |
| 429.3275 | 16.75 |
| 429.365  | 14.25 |
| 429.4    | 13    |
| 429.4325 | 17    |
| 429.4638 | 14.5  |
| 429.4963 | 15.75 |
| 429.53   | 16.75 |
| 429.56   | 17.25 |
| 429.595  | 18    |
| 429.6313 | 16.5  |
| 429.6638 | 18.75 |
| 429.6988 | 17.5  |
| 429.73   | 15.25 |
| 429.7613 | 12    |
| 429.7938 | 14.5  |
| 429.8275 | 15    |
| 429.865  | 17    |
| 429.8975 | 16    |
| 429.9325 | 16    |
| 429.9638 | 11.5  |
| 429.9975 | 12.25 |
| 430.03   | 14.75 |
| 430.06   | 12.25 |

|          |       |
|----------|-------|
| 428.44   | 16.5  |
| 428.4725 | 18.75 |
| 428.5075 | 19.5  |
| 428.5413 | 15.75 |
| 428.5788 | 17    |
| 428.61   | 16.5  |
| 428.6413 | 17.25 |
| 428.6738 | 14.5  |
| 428.7075 | 14.75 |
| 428.7413 | 19.25 |
| 428.7738 | 19.5  |
| 428.81   | 18    |
| 428.8438 | 18    |
| 428.8775 | 17.25 |
| 428.9075 | 17.25 |
| 428.94   | 21    |
| 428.9725 | 18.75 |
| 429.0075 | 16    |
| 429.0388 | 18.25 |
| 429.0788 | 18    |
| 429.11   | 21    |
| 429.1413 | 18    |
| 429.1738 | 17.25 |
| 429.2075 | 16.5  |
| 429.2413 | 16.75 |
| 429.2738 | 22.5  |
| 429.31   | 18.25 |
| 429.3438 | 19.75 |
| 429.3775 | 16    |
| 429.4075 | 20    |
| 429.4425 | 16.25 |
| 429.475  | 18    |
| 429.5075 | 18    |
| 429.5375 | 18.75 |
| 429.5788 | 17.25 |
| 429.61   | 13.25 |
| 429.6413 | 18.5  |
| 429.6738 | 16.5  |
| 429.7075 | 16.25 |
| 429.7413 | 15.25 |
| 429.7738 | 16.5  |
| 429.81   | 16.5  |
| 429.8438 | 15.25 |
| 429.8775 | 19.25 |
| 429.9075 | 18.5  |
| 429.94   | 17    |
| 429.975  | 21    |
| 430.0075 | 17.25 |
| 430.0375 | 11.75 |
| 430.0788 | 16.25 |

|          |       |
|----------|-------|
| 430.0963 | 14.75 |
| 430.1313 | 13    |
| 430.1638 | 13.5  |
| 430.1988 | 14.75 |
| 430.23   | 13.75 |
| 430.2613 | 12.75 |
| 430.2938 | 12    |
| 430.3275 | 11.5  |
| 430.365  | 12.5  |
| 430.3975 | 14    |
| 430.4325 | 13.25 |
| 430.4638 | 12.25 |
| 430.4963 | 11.75 |
| 430.53   | 13.5  |
| 430.56   | 15.25 |
| 430.6    | 10    |
| 430.6313 | 12    |
| 430.6638 | 15.5  |
| 430.6988 | 14.75 |
| 430.73   | 11.75 |
| 430.7613 | 14    |
| 430.7938 | 10.75 |
| 430.8275 | 11.25 |
| 430.865  | 9.25  |
| 430.8963 | 14.75 |
| 430.9325 | 11    |
| 430.9638 | 12.75 |
| 430.9963 | 10.5  |
| 431.03   | 10.5  |
| 431.06   | 10.75 |
| 431.0963 | 10.75 |
| 431.1313 | 11.5  |
| 431.1663 | 14.25 |
| 431.1988 | 13.5  |
| 431.23   | 14.25 |
| 431.2613 | 15.75 |
| 431.2938 | 13    |
| 431.3275 | 14.75 |
| 431.3625 | 13.75 |
| 431.3963 | 13.5  |
| 431.4325 | 12.25 |
| 431.4638 | 13    |
| 431.4963 | 13    |
| 431.53   | 17.75 |
| 431.56   | 14.5  |
| 431.5963 | 18.25 |
| 431.6313 | 19.25 |
| 431.665  | 15    |
| 431.6988 | 15.75 |
| 431.73   | 18.5  |

|          |       |
|----------|-------|
| 430.11   | 16.75 |
| 430.1413 | 16.5  |
| 430.1763 | 18.75 |
| 430.2075 | 15.75 |
| 430.2413 | 18.25 |
| 430.2738 | 18.75 |
| 430.31   | 18.5  |
| 430.3438 | 20.25 |
| 430.3775 | 21    |
| 430.4075 | 16    |
| 430.44   | 17.75 |
| 430.4775 | 18.25 |
| 430.5075 | 19.75 |
| 430.5375 | 17    |
| 430.58   | 21.5  |
| 430.6088 | 16.75 |
| 430.6413 | 18    |
| 430.6763 | 20.25 |
| 430.7075 | 20.25 |
| 430.7413 | 17.5  |
| 430.7738 | 20.5  |
| 430.81   | 16.5  |
| 430.8438 | 17.25 |
| 430.8775 | 15.75 |
| 430.9075 | 24    |
| 430.94   | 17.5  |
| 430.9775 | 22.5  |
| 431.0075 | 16    |
| 431.04   | 18    |
| 431.0788 | 14.75 |
| 431.1088 | 16.25 |
| 431.1413 | 17    |
| 431.1763 | 18    |
| 431.2075 | 17.5  |
| 431.2413 | 16    |
| 431.2738 | 18    |
| 431.31   | 18.5  |
| 431.3438 | 14.5  |
| 431.3775 | 16    |
| 431.4075 | 18.25 |
| 431.44   | 13    |
| 431.4775 | 17.5  |
| 431.5075 | 16.5  |
| 431.54   | 18    |
| 431.5788 | 17.5  |
| 431.6088 | 19    |
| 431.6413 | 19    |
| 431.6763 | 17.25 |
| 431.7075 | 19.5  |
| 431.7413 | 22.5  |

|          |       |
|----------|-------|
| 431.7613 | 18    |
| 431.7938 | 17.75 |
| 431.8275 | 16.5  |
| 431.8625 | 15.5  |
| 431.8975 | 12.25 |
| 431.9325 | 14.75 |
| 431.9638 | 14.75 |
| 431.9963 | 17.25 |
| 432.03   | 15.75 |
| 432.06   | 12.75 |
| 432.0963 | 13.25 |
| 432.1313 | 13.5  |
| 432.1675 | 12    |
| 432.1988 | 12.25 |
| 432.23   | 14    |
| 432.2613 | 8.75  |
| 432.2938 | 15    |
| 432.3275 | 17.75 |
| 432.3625 | 15    |
| 432.3963 | 12.25 |
| 432.4325 | 11.75 |
| 432.4638 | 15    |
| 432.4963 | 14.25 |
| 432.53   | 15.75 |
| 432.56   | 15    |
| 432.5963 | 12.25 |
| 432.63   | 13.75 |
| 432.665  | 18.25 |
| 432.6988 | 11.5  |
| 432.73   | 16.5  |
| 432.7638 | 17.75 |
| 432.7938 | 14.25 |
| 432.83   | 15.75 |
| 432.8625 | 15.5  |
| 432.8988 | 15.5  |
| 432.9325 | 16.25 |
| 432.9663 | 18.25 |
| 432.9963 | 15.75 |
| 433.03   | 15.75 |
| 433.06   | 12.25 |
| 433.0963 | 15.25 |
| 433.13   | 15.75 |
| 433.1625 | 13.75 |
| 433.1988 | 11.5  |
| 433.23   | 14.25 |
| 433.2638 | 12.75 |
| 433.2938 | 13.5  |
| 433.33   | 13    |
| 433.3625 | 14.75 |
| 433.3988 | 13    |

|          |       |
|----------|-------|
| 431.7738 | 17    |
| 431.81   | 16.75 |
| 431.8438 | 21.25 |
| 431.8775 | 20    |
| 431.9075 | 21    |
| 431.94   | 24.75 |
| 431.9775 | 20.75 |
| 432.0075 | 17    |
| 432.0425 | 30.5  |
| 432.0788 | 26.5  |
| 432.1088 | 16.5  |
| 432.1413 | 19.5  |
| 432.1763 | 18    |
| 432.2088 | 17.75 |
| 432.2413 | 25    |
| 432.2738 | 21.25 |
| 432.3125 | 22.75 |
| 432.3438 | 16.5  |
| 432.3775 | 18    |
| 432.4075 | 17    |
| 432.44   | 16.5  |
| 432.4788 | 16    |
| 432.5075 | 19.25 |
| 432.54   | 16.75 |
| 432.5788 | 18.5  |
| 432.6088 | 14.75 |
| 432.6413 | 17    |
| 432.6763 | 15.75 |
| 432.71   | 17.5  |
| 432.7413 | 20.75 |
| 432.7738 | 17    |
| 432.8125 | 18.5  |
| 432.8438 | 18.75 |
| 432.875  | 18.25 |
| 432.9075 | 18.5  |
| 432.94   | 22    |
| 432.9775 | 17.5  |
| 433.0075 | 20.25 |
| 433.04   | 16.5  |
| 433.0788 | 16    |
| 433.1088 | 17.5  |
| 433.1413 | 18.75 |
| 433.1763 | 15.5  |
| 433.21   | 13.25 |
| 433.2413 | 15.5  |
| 433.2738 | 17.5  |
| 433.3125 | 12.5  |
| 433.3438 | 17.75 |
| 433.375  | 17.5  |
| 433.4075 | 18    |

|          |       |
|----------|-------|
| 433.4325 | 13.5  |
| 433.4638 | 16.5  |
| 433.4963 | 15.5  |
| 433.53   | 13    |
| 433.56   | 12.5  |
| 433.5963 | 14.5  |
| 433.63   | 13    |
| 433.6625 | 16    |
| 433.6988 | 15.5  |
| 433.73   | 17.75 |
| 433.7638 | 21.25 |
| 433.7938 | 16    |
| 433.83   | 15.75 |
| 433.8625 | 19    |
| 433.8963 | 14.75 |
| 433.9325 | 14.75 |
| 433.9638 | 15.75 |
| 433.9963 | 13.5  |
| 434.03   | 16.75 |
| 434.06   | 17.75 |
| 434.0963 | 15.25 |
| 434.1313 | 16.5  |
| 434.1625 | 16.5  |
| 434.1988 | 16.25 |
| 434.23   | 15.25 |
| 434.2638 | 13.75 |
| 434.2938 | 17    |
| 434.33   | 14.75 |
| 434.3625 | 15    |
| 434.3963 | 17.25 |
| 434.4325 | 14    |
| 434.4638 | 12    |
| 434.4963 | 13.25 |
| 434.53   | 14.5  |
| 434.5613 | 13    |
| 434.5963 | 13.75 |
| 434.63   | 18.5  |
| 434.6638 | 15.25 |
| 434.6988 | 15.5  |
| 434.73   | 14.75 |
| 434.7638 | 15.75 |
| 434.7938 | 14.5  |
| 434.83   | 14.5  |
| 434.8625 | 14.25 |
| 434.8963 | 17    |
| 434.9325 | 16.75 |
| 434.9638 | 17    |
| 434.9963 | 12.5  |
| 435.03   | 13    |
| 435.06   | 14    |

|          |       |
|----------|-------|
| 433.44   | 18.25 |
| 433.4775 | 17.75 |
| 433.5075 | 16.75 |
| 433.54   | 18.75 |
| 433.5788 | 22.75 |
| 433.6088 | 17.5  |
| 433.6413 | 16.5  |
| 433.6763 | 23    |
| 433.71   | 16    |
| 433.7413 | 20.25 |
| 433.7738 | 21.75 |
| 433.8125 | 23    |
| 433.8438 | 26.5  |
| 433.875  | 27.75 |
| 433.91   | 25    |
| 433.94   | 19.25 |
| 433.9775 | 23.25 |
| 434.0075 | 27    |
| 434.04   | 25.75 |
| 434.0788 | 26.25 |
| 434.1088 | 29    |
| 434.1413 | 23    |
| 434.1763 | 24    |
| 434.21   | 21.75 |
| 434.2413 | 19    |
| 434.2738 | 18.5  |
| 434.31   | 19    |
| 434.3438 | 17.75 |
| 434.375  | 18.75 |
| 434.4075 | 20.25 |
| 434.445  | 20.5  |
| 434.4775 | 21    |
| 434.5075 | 17    |
| 434.54   | 20    |
| 434.5788 | 16    |
| 434.6088 | 15.5  |
| 434.6413 | 18    |
| 434.6763 | 21.75 |
| 434.71   | 19.5  |
| 434.7413 | 18    |
| 434.7738 | 17.75 |
| 434.81   | 20    |
| 434.8438 | 18.25 |
| 434.875  | 19.5  |
| 434.9075 | 20    |
| 434.945  | 20    |
| 434.9775 | 25    |
| 435.0075 | 24    |
| 435.04   | 23    |
| 435.0788 | 20.5  |

|          |       |          |       |
|----------|-------|----------|-------|
| 435.0963 | 13.75 | 435.1088 | 20.25 |
| 435.1313 | 13.75 | 435.14   | 20.25 |
| 435.1613 | 17    | 435.1763 | 22.5  |
| 435.1988 | 10.5  | 435.21   | 21.75 |
| 435.23   | 10    | 435.2413 | 26.5  |
| 435.2638 | 14.5  | 435.2763 | 24.25 |
| 435.2938 | 18.5  | 435.3075 | 20    |
| 435.3275 | 13    | 435.3438 | 23.5  |
| 435.3625 | 15.75 | 435.375  | 22.25 |
| 435.3963 | 17.25 | 435.4075 | 24.5  |
| 435.4313 | 16.25 | 435.445  | 24    |
| 435.4638 | 18.5  | 435.4775 | 20.75 |
| 435.4975 | 14.5  | 435.5075 | 23    |
| 435.53   | 16.75 | 435.54   | 21.5  |
| 435.56   | 17    | 435.5788 | 21.75 |
| 435.5963 | 17.5  | 435.6088 | 20.75 |
| 435.6313 | 16.75 | 435.64   | 20.5  |
| 435.6638 | 19    | 435.6775 | 20.25 |
| 435.6988 | 17.25 | 435.71   | 16.75 |
| 435.73   | 16.25 | 435.7413 | 20.5  |
| 435.7638 | 17    | 435.7738 | 20.75 |
| 435.7938 | 14.75 | 435.8075 | 16.75 |
| 435.8275 | 15.5  | 435.8438 | 17.5  |
| 435.8625 | 16.75 | 435.875  | 17.5  |
| 435.8963 | 15.25 | 435.9075 | 16    |
| 435.9313 | 14.25 | 435.945  | 19    |
| 435.9638 | 13.75 | 435.9775 | 16    |
| 435.9975 | 14    | 436.0075 | 16.75 |
| 436.03   | 13    | 436.04   | 16.5  |
| 436.0625 | 13    | 436.0788 | 15.75 |
| 436.0963 | 14.5  | 436.1088 | 18    |
| 436.1313 | 10.75 | 436.14   | 15.5  |
| 436.1638 | 11.25 | 436.1788 | 18    |
| 436.1988 | 11.5  | 436.21   | 22    |
| 436.23   | 10.5  | 436.2413 | 15.75 |
| 436.2638 | 15.25 | 436.275  | 17.75 |
| 436.2938 | 13.5  | 436.3075 | 17.25 |
| 436.3275 | 13    | 436.3438 | 22.75 |
| 436.3625 | 12    | 436.375  | 22.75 |
| 436.3963 | 11.5  | 436.4075 | 17.75 |
| 436.4288 | 15.5  | 436.445  | 17.5  |
| 436.4638 | 13.5  | 436.4775 | 19.25 |
| 436.4975 | 15.25 | 436.5075 | 21.25 |
| 436.53   | 16.75 | 436.54   | 17.75 |
| 436.5625 | 11.5  | 436.5788 | 18.25 |
| 436.5963 | 17.25 | 436.6088 | 16.75 |
| 436.6313 | 20    | 436.64   | 17.25 |
| 436.6638 | 20.5  | 436.6788 | 19.25 |
| 436.6988 | 23    | 436.71   | 17.75 |
| 436.73   | 19.5  | 436.7413 | 21.5  |

|          |       |          |       |
|----------|-------|----------|-------|
| 436.7638 | 17.25 | 436.775  | 20    |
| 436.7938 | 17.5  | 436.8075 | 19.25 |
| 436.8275 | 16.75 | 436.8438 | 20.5  |
| 436.8663 | 15    | 436.875  | 18.5  |
| 436.8963 | 16.25 | 436.91   | 22.75 |
| 436.9288 | 15    | 436.945  | 19.75 |
| 436.9638 | 14.25 | 436.9775 | 22.25 |
| 436.9975 | 21.75 | 437.0075 | 19.5  |
| 437.03   | 13.25 | 437.04   | 16.5  |
| 437.0625 | 19    | 437.0788 | 16.75 |
| 437.0963 | 16.25 | 437.1088 | 17.75 |
| 437.1313 | 13.25 | 437.14   | 20.5  |
| 437.1638 | 19.75 | 437.1788 | 16.25 |
| 437.1988 | 13.75 | 437.21   | 15.75 |
| 437.23   | 14    | 437.2413 | 21.5  |
| 437.2638 | 15.25 | 437.275  | 14.25 |
| 437.2938 | 13.5  | 437.3075 | 20    |
| 437.3275 | 15    | 437.3438 | 17    |
| 437.365  | 11.75 | 437.375  | 15.25 |
| 437.3963 | 17    | 437.41   | 16    |
| 437.4288 | 11.75 | 437.445  | 16.5  |
| 437.4638 | 13.25 | 437.4775 | 16.5  |
| 437.4975 | 13    | 437.5075 | 20.75 |
| 437.53   | 16.25 | 437.54   | 23    |
| 437.5625 | 15    | 437.5788 | 18.5  |
| 437.5963 | 16    | 437.6088 | 15.75 |
| 437.6313 | 13.25 | 437.64   | 20.75 |
| 437.6638 | 12.75 | 437.6788 | 20.75 |
| 437.6988 | 15.25 | 437.71   | 18.75 |
| 437.7325 | 16    | 437.7413 | 21.25 |
| 437.7663 | 13    | 437.775  | 19    |
| 437.7938 | 12.75 | 437.8075 | 16.25 |
| 437.8275 | 16.25 | 437.8438 | 18.75 |
| 437.865  | 13    | 437.875  | 21.5  |
| 437.8963 | 14    | 437.91   | 17    |
| 437.9288 | 14.25 | 437.945  | 17.25 |
| 437.9638 | 16    | 437.9775 | 15.25 |
| 437.9975 | 12.25 | 438.0075 | 21    |
| 438.03   | 12.5  | 438.0425 | 22.25 |
| 438.0625 | 14.75 | 438.0788 | 22.75 |
| 438.0963 | 14.25 | 438.1088 | 18.5  |
| 438.1313 | 11    | 438.1425 | 22.75 |
| 438.1663 | 13.75 | 438.1788 | 16.75 |
| 438.2    | 12.75 | 438.21   | 20.25 |
| 438.235  | 9     | 438.2413 | 19.75 |
| 438.2663 | 13.5  | 438.275  | 22.25 |
| 438.2963 | 11    | 438.3075 | 16.5  |
| 438.3288 | 12.75 | 438.3438 | 19.5  |
| 438.3663 | 11.25 | 438.375  | 18.75 |
| 438.3975 | 9.75  | 438.41   | 18.5  |

|          |       |          |       |
|----------|-------|----------|-------|
| 438.43   | 14.5  | 438.445  | 20.75 |
| 438.465  | 13.25 | 438.4775 | 21    |
| 438.4988 | 14    | 438.5075 | 20.75 |
| 438.5313 | 15.5  | 438.54   | 21.5  |
| 438.565  | 15.25 | 438.5788 | 21.25 |
| 438.5988 | 12.75 | 438.6088 | 21    |
| 438.6338 | 14.25 | 438.6425 | 24.25 |
| 438.6675 | 11.75 | 438.6763 | 19.25 |
| 438.7    | 15.75 | 438.71   | 19    |
| 438.735  | 11.25 | 438.7413 | 18.25 |
| 438.7663 | 10    | 438.775  | 21    |
| 438.7963 | 11.75 | 438.8075 | 19.5  |
| 438.8288 | 12    | 438.8438 | 22    |
| 438.8663 | 11    | 438.875  | 22.5  |
| 438.8975 | 11    | 438.91   | 18    |
| 438.93   | 13.25 | 438.945  | 17.25 |
| 438.965  | 12    | 438.9775 | 16    |
| 438.9988 | 12    | 439.0075 | 18.75 |
| 439.0313 | 13.5  | 439.0425 | 15.75 |
| 439.065  | 11.75 | 439.0788 | 19.75 |
| 439.0988 | 11.25 | 439.1088 | 17.5  |
| 439.1338 | 8.25  | 439.1425 | 18    |
| 439.1638 | 10.75 | 439.1763 | 16    |
| 439.2    | 15.75 | 439.21   | 16.5  |
| 439.235  | 14.5  | 439.2413 | 16.75 |
| 439.2663 | 14.75 | 439.275  | 17.25 |
| 439.2963 | 12.25 | 439.3075 | 22.75 |
| 439.3288 | 12.25 | 439.3438 | 19    |
| 439.3663 | 12.5  | 439.3763 | 21    |
| 439.3975 | 10.25 | 439.41   | 17.25 |
| 439.43   | 14    | 439.445  | 21.75 |
| 439.4638 | 13    | 439.4775 | 18.25 |
| 439.4988 | 12.25 | 439.51   | 19.75 |
| 439.5313 | 14.5  | 439.54   | 18.75 |
| 439.5675 | 15.5  | 439.5763 | 17.5  |
| 439.5988 | 14.25 | 439.6088 | 23    |
| 439.6338 | 11    | 439.6438 | 18    |
| 439.6638 | 15.25 | 439.6763 | 22    |
| 439.7    | 12.5  | 439.71   | 21    |
| 439.735  | 14    | 439.7413 | 19.5  |
| 439.7688 | 15.5  | 439.775  | 20.5  |
| 439.7988 | 16    | 439.8075 | 19    |
| 439.8313 | 14.25 | 439.8463 | 15.5  |
| 439.8688 | 16.25 | 439.8763 | 13.5  |
| 439.9    | 15.75 | 439.91   | 18    |
| 439.9313 | 14    | 439.945  | 21.75 |
| 439.9663 | 15.25 | 439.9775 | 17.75 |
| 440.0013 | 13.25 | 440.01   | 20.75 |
| 440.0325 | 12.5  | 440.04   | 20.75 |
| 440.0663 | 13.75 | 440.0763 | 17.75 |



|          |       |
|----------|-------|
| 440.1    | 13    |
| 440.135  | 11.75 |
| 440.1663 | 13    |
| 440.2038 | 11    |
| 440.2363 | 11.25 |
| 440.2688 | 15.25 |
| 440.2988 | 15.5  |
| 440.3313 | 16.25 |
| 440.3688 | 14.25 |
| 440.4    | 13.5  |
| 440.4313 | 12    |
| 440.4663 | 12    |
| 440.5013 | 14.5  |
| 440.5325 | 16.75 |
| 440.5663 | 13.5  |
| 440.6    | 13    |
| 440.635  | 12.5  |
| 440.6663 | 11.25 |
| 440.7038 | 10.5  |
| 440.7363 | 11.25 |
| 440.7688 | 13.75 |
| 440.7988 | 12    |
| 440.8313 | 17    |
| 440.8725 | 13    |
| 440.9025 | 13.75 |
| 440.9313 | 15.5  |
| 440.9663 | 13.5  |
| 441.0013 | 11.5  |
| 441.0325 | 11    |
| 441.0663 | 11.25 |
| 441.0975 | 12.75 |
| 441.135  | 13    |
| 441.1663 | 13.5  |
| 441.2038 | 11.25 |
| 441.235  | 13.5  |
| 441.2688 | 12.75 |
| 441.2988 | 12.5  |
| 441.3313 | 16.25 |
| 441.3688 | 14.5  |
| 441.4    | 13    |
| 441.4313 | 11.5  |
| 441.4663 | 13.75 |
| 441.5013 | 12.25 |
| 441.5325 | 15.25 |
| 441.5663 | 12.75 |
| 441.5975 | 12.75 |
| 441.635  | 12.5  |
| 441.6663 | 12.5  |
| 441.7013 | 16.5  |
| 441.735  | 10.5  |

|          |       |
|----------|-------|
| 440.1088 | 19.5  |
| 440.1438 | 18.25 |
| 440.1763 | 19    |
| 440.21   | 22    |
| 440.2413 | 14.5  |
| 440.275  | 16.5  |
| 440.31   | 20    |
| 440.3463 | 22.5  |
| 440.3788 | 16.25 |
| 440.4125 | 17    |
| 440.4475 | 18    |
| 440.4788 | 18    |
| 440.5113 | 19.5  |
| 440.5413 | 20.75 |
| 440.58   | 18    |
| 440.6125 | 22.25 |
| 440.645  | 18.5  |
| 440.6775 | 18    |
| 440.7125 | 21    |
| 440.7438 | 17.25 |
| 440.7775 | 17.25 |
| 440.81   | 15.5  |
| 440.8463 | 19.5  |
| 440.8788 | 16.25 |
| 440.9125 | 18.25 |
| 440.9475 | 23.75 |
| 440.9788 | 18    |
| 441.0113 | 17.75 |
| 441.0413 | 17.5  |
| 441.08   | 18.25 |
| 441.1125 | 13.25 |
| 441.145  | 17.75 |
| 441.1775 | 16    |
| 441.2125 | 13    |
| 441.2438 | 16.75 |
| 441.2775 | 15.5  |
| 441.31   | 16.5  |
| 441.3463 | 18.75 |
| 441.3813 | 15.5  |
| 441.4125 | 13.75 |
| 441.4475 | 16.75 |
| 441.4788 | 16    |
| 441.5113 | 13.75 |
| 441.5413 | 19.5  |
| 441.58   | 16.25 |
| 441.6125 | 16.25 |
| 441.645  | 18    |
| 441.6775 | 18.75 |
| 441.7125 | 17.25 |
| 441.745  | 17.25 |

|          |       |          |       |
|----------|-------|----------|-------|
| 441.7688 | 12.25 | 441.7775 | 16.75 |
| 441.7988 | 14.75 | 441.81   | 15    |
| 441.8313 | 12.75 | 441.8475 | 16.5  |
| 441.8688 | 14.5  | 441.8813 | 16.25 |
| 441.9    | 17    | 441.9125 | 16.5  |
| 441.9338 | 16.5  | 441.945  | 17    |
| 441.9663 | 14.5  | 441.9788 | 14.25 |
| 442.0013 | 13.75 | 442.0113 | 13.75 |
| 442.0338 | 13.25 | 442.0413 | 17.75 |
| 442.0663 | 11.75 | 442.0775 | 15.25 |
| 442.0975 | 14    | 442.1125 | 16.25 |
| 442.135  | 8.25  | 442.145  | 15.5  |
| 442.1663 | 8.5   | 442.1775 | 15.5  |
| 442.2013 | 11.5  | 442.2125 | 13.25 |
| 442.235  | 12.5  | 442.245  | 16.25 |
| 442.2688 | 14    | 442.2775 | 17    |
| 442.2988 | 8.25  | 442.31   | 16.75 |
| 442.3338 | 11    | 442.3475 | 17.5  |
| 442.3688 | 11    | 442.3813 | 13.25 |
| 442.4    | 9.25  | 442.4125 | 15.5  |
| 442.4338 | 11    | 442.445  | 17.5  |
| 442.4663 | 11    | 442.4788 | 17    |
| 442.5013 | 8.5   | 442.5113 | 18.25 |
| 442.5325 | 7     | 442.5413 | 16.5  |
| 442.5663 | 11    | 442.5775 | 14.5  |
| 442.5975 | 9.75  | 442.6125 | 19.25 |
| 442.635  | 12.25 | 442.645  | 15.5  |
| 442.6663 | 9.75  | 442.6775 | 13.5  |
| 442.7013 | 13.25 | 442.7125 | 18.25 |
| 442.735  | 10.25 | 442.745  | 13    |
| 442.7688 | 10.75 | 442.7775 | 15.5  |
| 442.7988 | 10.75 | 442.81   | 17.75 |
| 442.8313 | 13    | 442.8475 | 14    |
| 442.8688 | 12    | 442.8813 | 14.75 |
| 442.9    | 8.75  | 442.9125 | 11.75 |
| 442.9338 | 12    | 442.945  | 15.75 |
| 442.9663 | 12    | 442.9788 | 15.25 |
| 443.0013 | 10.5  | 443.0113 | 14.5  |
| 443.0325 | 12    | 443.0413 | 16.5  |
| 443.0663 | 14.5  | 443.0775 | 14.25 |
| 443.0975 | 12    | 443.115  | 12.75 |
| 443.135  | 9.5   | 443.145  | 15.25 |
| 443.1663 | 11.25 | 443.1775 | 18.25 |
| 443.2013 | 10    | 443.2125 | 16    |
| 443.235  | 8.5   | 443.245  | 13.25 |
| 443.2688 | 13    | 443.2775 | 12.75 |
| 443.2988 | 12.75 | 443.31   | 13.5  |
| 443.3313 | 8.25  | 443.3475 | 16.75 |
| 443.3688 | 13    | 443.3813 | 14.75 |
| 443.4    | 11    | 443.4125 | 15.75 |

|          |       |          |       |
|----------|-------|----------|-------|
| 443.4338 | 9.75  | 443.4475 | 11.75 |
| 443.4663 | 11    | 443.4788 | 12.5  |
| 443.4988 | 10    | 443.5113 | 17.5  |
| 443.5325 | 10    | 443.5413 | 15.25 |
| 443.5638 | 9.25  | 443.5788 | 13.25 |
| 443.5975 | 10.75 | 443.615  | 15.5  |
| 443.6363 | 12.25 | 443.645  | 15.25 |
| 443.6663 | 11    | 443.6775 | 11.75 |
| 443.7013 | 9.75  | 443.7125 | 17.25 |
| 443.735  | 12    | 443.745  | 15.25 |
| 443.7688 | 9.75  | 443.7775 | 18.5  |
| 443.7988 | 9.75  | 443.81   | 12.75 |
| 443.8338 | 11.25 | 443.8475 | 13.75 |
| 443.8688 | 10.5  | 443.8813 | 14.75 |
| 443.9    | 10.5  | 443.9125 | 16.75 |
| 443.9325 | 10.5  | 443.945  | 15.25 |
| 443.9663 | 9     | 443.9813 | 17.75 |
| 443.9988 | 14    | 444.0113 | 16.25 |
| 444.0325 | 13.25 | 444.0413 | 15.25 |
| 444.0638 | 9     | 444.0788 | 20.25 |
| 444.0975 | 11.25 | 444.115  | 15.75 |
| 444.135  | 10.25 | 444.145  | 18.25 |
| 444.1675 | 6.75  | 444.1775 | 16.5  |
| 444.2013 | 11    | 444.2125 | 21    |
| 444.235  | 12.75 | 444.245  | 18.75 |
| 444.2688 | 9.25  | 444.2775 | 15.25 |
| 444.2988 | 12.25 | 444.31   | 16    |
| 444.3313 | 12.5  | 444.3475 | 15.25 |
| 444.3688 | 11.5  | 444.3813 | 15    |
| 444.4    | 10.5  | 444.4125 | 17.5  |
| 444.4325 | 10.75 | 444.445  | 11.75 |
| 444.4663 | 9.25  | 444.4813 | 16.5  |
| 444.4988 | 10    | 444.5113 | 12    |
| 444.5325 | 9     | 444.5413 | 13.75 |
| 444.5638 | 7.25  | 444.58   | 14    |
| 444.5975 | 12.75 | 444.615  | 12.5  |
| 444.635  | 9.25  | 444.645  | 15.25 |
| 444.6675 | 13.75 | 444.675  | 12.75 |
| 444.7013 | 9.5   | 444.7113 | 16    |
| 444.735  | 10.5  | 444.745  | 10.75 |
| 444.7688 | 12.25 | 444.7775 | 13.25 |
| 444.7988 | 6.75  | 444.81   | 16    |
| 444.8313 | 8.5   | 444.8475 | 14.5  |
| 444.8675 | 11.75 | 444.8813 | 12.25 |
| 444.9    | 10.75 | 444.915  | 11.5  |
| 444.9325 | 10.25 | 444.945  | 14.5  |
| 444.965  | 9     | 444.9813 | 15.5  |
| 444.9988 | 9.75  | 445.0113 | 15.75 |
| 445.0325 | 13    | 445.0413 | 17    |
| 445.0638 | 13.25 | 445.0788 | 15.75 |

|          |       |          |       |
|----------|-------|----------|-------|
| 445.1    | 11.75 | 445.115  | 17.25 |
| 445.135  | 12.75 | 445.145  | 18.5  |
| 445.1675 | 12.25 | 445.175  | 18.75 |
| 445.2013 | 12.25 | 445.2113 | 15    |
| 445.235  | 12.75 | 445.245  | 15.5  |
| 445.2663 | 14.5  | 445.2775 | 16.25 |
| 445.2988 | 13    | 445.31   | 17.5  |
| 445.3313 | 12.75 | 445.3488 | 14.25 |
| 445.3675 | 17.25 | 445.3813 | 19.5  |
| 445.4    | 13.5  | 445.4125 | 17.25 |
| 445.4325 | 15    | 445.445  | 17.75 |
| 445.465  | 12.5  | 445.4813 | 19.75 |
| 445.4988 | 11.25 | 445.5113 | 19    |
| 445.5325 | 14.75 | 445.5413 | 18.5  |
| 445.5638 | 16    | 445.5788 | 17.25 |
| 445.6    | 16.25 | 445.615  | 22.5  |
| 445.635  | 13.5  | 445.645  | 24.5  |
| 445.6675 | 11    | 445.675  | 20.5  |
| 445.7013 | 14.5  | 445.7125 | 21.25 |
| 445.735  | 11.75 | 445.745  | 19.25 |
| 445.7663 | 13    | 445.7775 | 20.5  |
| 445.7988 | 14.25 | 445.8113 | 17.25 |
| 445.8313 | 12.25 | 445.8488 | 19.5  |
| 445.8675 | 11    | 445.8813 | 14.5  |
| 445.9    | 11.5  | 445.9125 | 20    |
| 445.9325 | 11.5  | 445.945  | 21.75 |
| 445.965  | 15    | 445.9813 | 18.75 |
| 445.9988 | 13    | 446.0113 | 20    |
| 446.0325 | 13    | 446.0413 | 17.75 |
| 446.0638 | 12.5  | 446.0788 | 19.5  |
| 446.1    | 11    | 446.115  | 16.5  |
| 446.135  | 14.25 | 446.145  | 16.75 |
| 446.1688 | 9     | 446.175  | 14.5  |
| 446.2013 | 10.25 | 446.2125 | 15    |
| 446.235  | 11    | 446.245  | 20.5  |
| 446.2663 | 10    | 446.2775 | 16.25 |
| 446.2988 | 11.25 | 446.3113 | 18.75 |
| 446.3313 | 9.75  | 446.3488 | 17    |
| 446.3675 | 9.75  | 446.3813 | 16.25 |
| 446.4025 | 14.5  | 446.4125 | 10.75 |
| 446.4325 | 11    | 446.445  | 12    |
| 446.465  | 12.5  | 446.4813 | 18.75 |
| 446.4988 | 11.75 | 446.5113 | 15    |
| 446.5325 | 10.75 | 446.5413 | 20.5  |
| 446.5638 | 8.75  | 446.5788 | 17.5  |
| 446.6    | 10.25 | 446.615  | 20.75 |
| 446.6363 | 11.25 | 446.645  | 13.5  |
| 446.6675 | 11    | 446.675  | 19    |
| 446.7013 | 8.75  | 446.7125 | 19.75 |
| 446.735  | 12.75 | 446.745  | 18.75 |

|          |       |
|----------|-------|
| 446.7675 | 9.75  |
| 446.7988 | 9.75  |
| 446.8313 | 13.75 |
| 446.8675 | 11.5  |
| 446.9025 | 11    |
| 446.9325 | 12.75 |
| 446.965  | 12.25 |
| 446.9988 | 16.75 |
| 447.0325 | 10.75 |
| 447.0638 | 10    |
| 447.1    | 14    |
| 447.135  | 11.25 |
| 447.1675 | 13.75 |
| 447.1988 | 12    |
| 447.235  | 13.75 |
| 447.2663 | 14.75 |
| 447.2988 | 13.5  |
| 447.3313 | 15.25 |
| 447.3688 | 13.5  |
| 447.4025 | 16.75 |
| 447.4325 | 12.5  |
| 447.465  | 13.25 |
| 447.4988 | 14.25 |
| 447.5325 | 12.5  |
| 447.5638 | 17.25 |
| 447.6    | 19.5  |
| 447.635  | 17.25 |
| 447.67   | 19    |
| 447.7013 | 15.75 |
| 447.7363 | 13    |
| 447.7675 | 14.25 |
| 447.8    | 13.5  |
| 447.8325 | 11.25 |
| 447.8725 | 11.75 |
| 447.9063 | 12    |
| 447.9338 | 14.75 |
| 447.9675 | 14.5  |
| 448.0013 | 11.25 |
| 448.035  | 11.25 |
| 448.0688 | 11    |
| 448.1025 | 13.75 |
| 448.135  | 14.25 |
| 448.17   | 13.5  |
| 448.2013 | 13.5  |
| 448.2363 | 13.25 |
| 448.2675 | 14    |
| 448.3    | 11    |
| 448.3325 | 12.75 |
| 448.3688 | 12    |
| 448.4038 | 15.5  |

|          |       |
|----------|-------|
| 446.7775 | 21    |
| 446.8113 | 19.25 |
| 446.8488 | 16    |
| 446.8813 | 16.25 |
| 446.9125 | 13    |
| 446.945  | 16.5  |
| 446.9813 | 15.25 |
| 447.0113 | 16.75 |
| 447.0413 | 18    |
| 447.0813 | 21.5  |
| 447.115  | 22.5  |
| 447.145  | 20.75 |
| 447.175  | 18.75 |
| 447.2125 | 20    |
| 447.245  | 20    |
| 447.2775 | 16.5  |
| 447.31   | 17.25 |
| 447.3488 | 23    |
| 447.3813 | 19.5  |
| 447.4125 | 20.75 |
| 447.445  | 19.75 |
| 447.4788 | 15.75 |
| 447.5113 | 16    |
| 447.5413 | 16.75 |
| 447.5813 | 18    |
| 447.615  | 15    |
| 447.645  | 15.75 |
| 447.675  | 15.5  |
| 447.7125 | 18.5  |
| 447.745  | 17.75 |
| 447.7775 | 25.75 |
| 447.81   | 17    |
| 447.8463 | 19    |
| 447.8813 | 19.75 |
| 447.9125 | 16.5  |
| 447.9475 | 20.5  |
| 447.9788 | 20    |
| 448.0113 | 27.75 |
| 448.0413 | 21.25 |
| 448.0813 | 16.5  |
| 448.1175 | 17.75 |
| 448.145  | 17.75 |
| 448.175  | 17.75 |
| 448.2125 | 15.5  |
| 448.245  | 14.75 |
| 448.2775 | 16.75 |
| 448.31   | 21    |
| 448.3463 | 19.5  |
| 448.3813 | 21.75 |
| 448.4125 | 21    |

|          |       |
|----------|-------|
| 448.4338 | 14.25 |
| 448.4725 | 14    |
| 448.5013 | 13    |
| 448.535  | 14.25 |
| 448.5688 | 12.25 |
| 448.6025 | 11.75 |
| 448.6375 | 14.25 |
| 448.67   | 11    |
| 448.7013 | 10.5  |
| 448.7363 | 11    |
| 448.7675 | 11.75 |
| 448.8    | 10.25 |
| 448.8325 | 14.25 |
| 448.8688 | 10.5  |
| 448.9038 | 14.5  |
| 448.9338 | 16.5  |
| 448.9675 | 13.25 |
| 449.0013 | 10.75 |
| 449.035  | 14.5  |
| 449.07   | 14.25 |
| 449.1025 | 10.75 |
| 449.1375 | 15.5  |
| 449.17   | 10.5  |
| 449.2013 | 14.5  |
| 449.2338 | 10.5  |
| 449.2675 | 13.5  |
| 449.3    | 10.75 |
| 449.3325 | 13    |
| 449.3688 | 14    |
| 449.4038 | 14    |
| 449.4338 | 15    |
| 449.4675 | 18.75 |
| 449.5013 | 14    |
| 449.535  | 12    |
| 449.5688 | 15.25 |
| 449.6025 | 15    |
| 449.6375 | 14.75 |
| 449.6713 | 12.25 |
| 449.7013 | 13.25 |
| 449.7338 | 16.25 |
| 449.7675 | 10.5  |
| 449.8    | 13.25 |
| 449.835  | 15    |
| 449.8688 | 14.25 |
| 449.9038 | 12.5  |
| 449.9338 | 13.5  |
| 449.9675 | 12.5  |
| 450.0013 | 13    |
| 450.035  | 12.5  |
| 450.0663 | 11.75 |

|          |       |
|----------|-------|
| 448.4475 | 18    |
| 448.4788 | 19.75 |
| 448.5138 | 18.75 |
| 448.5438 | 16    |
| 448.5813 | 20.5  |
| 448.615  | 15.25 |
| 448.645  | 20    |
| 448.675  | 18    |
| 448.7125 | 16.5  |
| 448.745  | 17    |
| 448.7775 | 18.75 |
| 448.8113 | 17.5  |
| 448.845  | 19.75 |
| 448.8813 | 15.75 |
| 448.9125 | 18.25 |
| 448.9475 | 18    |
| 448.9788 | 17    |
| 449.0138 | 18.25 |
| 449.0438 | 18    |
| 449.0813 | 17.5  |
| 449.115  | 20.5  |
| 449.145  | 20    |
| 449.1775 | 17    |
| 449.2125 | 17.75 |
| 449.245  | 17.75 |
| 449.2775 | 18.5  |
| 449.3113 | 18.75 |
| 449.345  | 18    |
| 449.3813 | 20.75 |
| 449.4125 | 19.25 |
| 449.4463 | 18.75 |
| 449.4788 | 19.5  |
| 449.5113 | 18    |
| 449.5438 | 20.75 |
| 449.5813 | 17.75 |
| 449.615  | 16.75 |
| 449.645  | 20    |
| 449.6775 | 19    |
| 449.7125 | 20.25 |
| 449.745  | 20    |
| 449.7775 | 19    |
| 449.8113 | 18.75 |
| 449.8463 | 17.75 |
| 449.8838 | 18    |
| 449.915  | 17.75 |
| 449.9488 | 15.75 |
| 449.98   | 16    |
| 450.0125 | 16    |
| 450.045  | 18.75 |
| 450.0838 | 17.5  |

|          |       |          |       |
|----------|-------|----------|-------|
| 450.1025 | 9.5   | 450.1163 | 19    |
| 450.1375 | 11.25 | 450.1463 | 16.25 |
| 450.17   | 10.5  | 450.1788 | 16.5  |
| 450.2013 | 11.25 | 450.215  | 21.5  |
| 450.2338 | 13.5  | 450.2463 | 17.5  |
| 450.2675 | 11.25 | 450.28   | 16.25 |
| 450.3    | 12.75 | 450.315  | 19.5  |
| 450.335  | 9.25  | 450.3488 | 22.25 |
| 450.3688 | 9.75  | 450.3838 | 16.75 |
| 450.4025 | 10.75 | 450.415  | 16.25 |
| 450.435  | 10.75 | 450.4488 | 20    |
| 450.47   | 9     | 450.48   | 20    |
| 450.5038 | 10.75 | 450.5125 | 18.75 |
| 450.5363 | 9.75  | 450.5475 | 17.75 |
| 450.5675 | 11.75 | 450.5838 | 19.75 |
| 450.6038 | 13.5  | 450.6163 | 17.25 |
| 450.64   | 13    | 450.6463 | 19.5  |
| 450.6725 | 13.25 | 450.6788 | 16.5  |
| 450.705  | 11    | 450.715  | 18.25 |
| 450.735  | 12    | 450.7463 | 19.25 |
| 450.77   | 12.25 | 450.78   | 17    |
| 450.8025 | 7.5   | 450.8138 | 22.75 |
| 450.84   | 12.75 | 450.8488 | 16.75 |
| 450.8713 | 11.25 | 450.8838 | 18.25 |
| 450.9038 | 9.75  | 450.915  | 16.5  |
| 450.935  | 9.5   | 450.9488 | 18.25 |
| 450.97   | 11.75 | 450.98   | 18    |
| 451.0038 | 9     | 451.0125 | 14.25 |
| 451.0363 | 10    | 451.0475 | 15.25 |
| 451.0675 | 10.5  | 451.0838 | 17.5  |
| 451.105  | 10.75 | 451.1163 | 17.75 |
| 451.14   | 10.25 | 451.1463 | 16.5  |
| 451.1725 | 12.75 | 451.1788 | 12.25 |
| 451.205  | 13    | 451.2125 | 13.25 |
| 451.235  | 13.75 | 451.2463 | 17.25 |
| 451.27   | 12    | 451.2813 | 14.75 |
| 451.3025 | 16.25 | 451.3138 | 15.5  |
| 451.3375 | 16    | 451.3488 | 15.25 |
| 451.3713 | 13.5  | 451.3838 | 16    |
| 451.4038 | 12.25 | 451.415  | 13    |
| 451.435  | 13.25 | 451.4488 | 16    |
| 451.47   | 14.5  | 451.48   | 12    |
| 451.5038 | 11.25 | 451.5125 | 17    |
| 451.5363 | 11    | 451.5475 | 14    |
| 451.5675 | 12    | 451.5838 | 15.25 |
| 451.605  | 10.5  | 451.6163 | 13.75 |
| 451.64   | 9.75  | 451.6463 | 16    |
| 451.6725 | 12.25 | 451.6788 | 14.5  |
| 451.705  | 14.25 | 451.7125 | 15    |
| 451.735  | 11.25 | 451.7463 | 17    |

|          |       |          |       |
|----------|-------|----------|-------|
| 451.77   | 12.5  | 451.7813 | 18    |
| 451.8025 | 13.5  | 451.8138 | 15.5  |
| 451.8375 | 14.75 | 451.8513 | 19.75 |
| 451.8725 | 11    | 451.8838 | 15.25 |
| 451.905  | 15.25 | 451.9163 | 19.5  |
| 451.935  | 15    | 451.9488 | 21.5  |
| 451.97   | 11.75 | 451.98   | 17.5  |
| 452.0038 | 13.75 | 452.0125 | 16.5  |
| 452.0363 | 13.25 | 452.0475 | 19    |
| 452.0675 | 11    | 452.0838 | 24.5  |
| 452.105  | 14    | 452.1163 | 14.75 |
| 452.14   | 12.5  | 452.1463 | 15    |
| 452.1738 | 12.25 | 452.1788 | 11.25 |
| 452.205  | 11.75 | 452.2125 | 19.25 |
| 452.235  | 12.25 | 452.2463 | 12.75 |
| 452.27   | 11    | 452.2813 | 15.25 |
| 452.3025 | 12    | 452.3138 | 17.5  |
| 452.3375 | 10.75 | 452.3463 | 17.5  |
| 452.3725 | 8.75  | 452.3838 | 11.5  |
| 452.4038 | 10    | 452.4163 | 17.25 |
| 452.435  | 12.75 | 452.4488 | 16.25 |
| 452.4725 | 9.25  | 452.48   | 27.5  |
| 452.5025 | 11.75 | 452.5125 | 24.5  |
| 452.5363 | 9.75  | 452.5475 | 15.5  |
| 452.5675 | 11.25 | 452.5838 | 19.5  |
| 452.6063 | 11.5  | 452.6163 | 18.25 |
| 452.6425 | 16    | 452.6463 | 20.75 |
| 452.6725 | 11.5  | 452.6788 | 17.5  |
| 452.705  | 10.5  | 452.7125 | 15.5  |
| 452.735  | 12.25 | 452.7463 | 14.5  |
| 452.77   | 12    | 452.7813 | 15.25 |
| 452.8025 | 11.5  | 452.8138 | 21.5  |
| 452.84   | 14.25 | 452.8463 | 20    |
| 452.8725 | 12.5  | 452.8838 | 16.25 |
| 452.9038 | 13    | 452.9163 | 16.25 |
| 452.935  | 15    | 452.9488 | 19.75 |
| 452.97   | 12.75 | 452.9788 | 17.5  |
| 453.0025 | 13.25 | 453.01   | 17    |
| 453.0363 | 11.75 | 453.0475 | 15.5  |
| 453.0675 | 14    | 453.0838 | 17.5  |
| 453.105  | 10    | 453.1163 | 17    |
| 453.14   | 12    | 453.1463 | 18.75 |
| 453.1725 | 16.25 | 453.1788 | 21.5  |
| 453.205  | 13.5  | 453.2125 | 18.25 |
| 453.235  | 9.75  | 453.2463 | 17    |
| 453.27   | 8.75  | 453.2813 | 19.25 |
| 453.3025 | 10.25 | 453.3138 | 21    |
| 453.3375 | 8     | 453.3463 | 21.25 |
| 453.3725 | 9.75  | 453.3838 | 16.75 |
| 453.4038 | 10    | 453.4163 | 17.25 |



|          |       |          |       |
|----------|-------|----------|-------|
| 453.435  | 12    | 453.4488 | 15.75 |
| 453.47   | 10    | 453.4813 | 17.25 |
| 453.5025 | 11.25 | 453.51   | 22.25 |
| 453.5363 | 8.75  | 453.5475 | 18.75 |
| 453.5675 | 10.75 | 453.5838 | 22    |
| 453.605  | 13.5  | 453.615  | 18.25 |
| 453.64   | 8.75  | 453.6463 | 18.5  |
| 453.67   | 13.25 | 453.6788 | 18.25 |
| 453.7063 | 8     | 453.7125 | 24    |
| 453.735  | 12.25 | 453.7463 | 18.75 |
| 453.77   | 11.25 | 453.7825 | 27.25 |
| 453.8025 | 9     | 453.8138 | 21.25 |
| 453.8375 | 8.75  | 453.8463 | 19.5  |
| 453.8725 | 11    | 453.8838 | 14.5  |
| 453.9038 | 11    | 453.9163 | 23.25 |
| 453.935  | 10    | 453.9488 | 22.75 |
| 453.97   | 9.25  | 453.9788 | 20.75 |
| 454.0025 | 7.5   | 454.01   | 20    |
| 454.0363 | 7.25  | 454.0475 | 18    |
| 454.0675 | 8.75  | 454.0838 | 18.25 |
| 454.1075 | 12.75 | 454.115  | 20    |
| 454.14   | 11.5  | 454.1463 | 20.25 |
| 454.17   | 12    | 454.1788 | 18.5  |
| 454.205  | 14.5  | 454.2125 | 22    |
| 454.235  | 13.75 | 454.2438 | 19.25 |
| 454.27   | 13.5  | 454.2825 | 22.75 |
| 454.3025 | 15    | 454.315  | 21.25 |
| 454.3375 | 12.5  | 454.3463 | 20.25 |
| 454.3725 | 16.5  | 454.3838 | 18.75 |
| 454.4038 | 11.5  | 454.4163 | 25.5  |
| 454.435  | 13    | 454.4488 | 24.25 |
| 454.47   | 13.5  | 454.4788 | 17.75 |
| 454.5025 | 13.5  | 454.5125 | 20.75 |
| 454.5363 | 13.75 | 454.5475 | 18    |
| 454.5675 | 12.75 | 454.5838 | 17.25 |
| 454.6075 | 14.25 | 454.615  | 19.25 |
| 454.6425 | 13    | 454.6463 | 16    |
| 454.67   | 12.5  | 454.6788 | 20    |
| 454.705  | 11.75 | 454.7125 | 21.75 |
| 454.735  | 14.5  | 454.7438 | 19    |
| 454.7738 | 10.75 | 454.7838 | 20.75 |
| 454.8025 | 10.25 | 454.815  | 18.25 |
| 454.8375 | 10.5  | 454.8463 | 16.75 |
| 454.8725 | 12    | 454.8838 | 22    |
| 454.9038 | 9.75  | 454.9163 | 19    |
| 454.935  | 10    | 454.9488 | 14.25 |
| 454.97   | 16.25 | 454.9788 | 17.25 |
| 455.0025 | 10.5  | 455.0125 | 14.75 |
| 455.0363 | 12    | 455.0475 | 18.5  |
| 455.0675 | 11.25 | 455.0838 | 17    |

|          |       |
|----------|-------|
| 455.1075 | 12.25 |
| 455.14   | 11.5  |
| 455.1713 | 11    |
| 455.205  | 12    |
| 455.2363 | 15.75 |
| 455.2738 | 12    |
| 455.3038 | 14.5  |
| 455.3413 | 11    |
| 455.3738 | 9     |
| 455.405  | 11    |
| 455.4375 | 14    |
| 455.4725 | 10    |
| 455.505  | 13.5  |
| 455.5388 | 12.5  |
| 455.57   | 11.75 |
| 455.61   | 15    |
| 455.645  | 16    |
| 455.6725 | 13.5  |
| 455.7063 | 13.5  |
| 455.7363 | 9.5   |
| 455.7763 | 14    |
| 455.8038 | 12    |
| 455.8425 | 11.5  |
| 455.8738 | 11.5  |
| 455.905  | 14.5  |
| 455.9375 | 12.5  |
| 455.9725 | 16    |
| 456.005  | 13    |
| 456.0388 | 13.25 |
| 456.0713 | 12    |
| 456.11   | 12.5  |
| 456.1425 | 12.5  |
| 456.1725 | 17.75 |
| 456.2063 | 15    |
| 456.24   | 14.5  |
| 456.2738 | 15.25 |
| 456.3038 | 16    |
| 456.3425 | 12.25 |
| 456.3738 | 13.5  |
| 456.405  | 16    |
| 456.4375 | 8.5   |
| 456.4725 | 14.5  |
| 456.505  | 12.75 |
| 456.5388 | 13.75 |
| 456.57   | 10.75 |
| 456.61   | 11.25 |
| 456.6425 | 14.5  |
| 456.6725 | 12.25 |
| 456.7063 | 10.75 |
| 456.7363 | 13.25 |

|          |       |
|----------|-------|
| 455.1138 | 15.25 |
| 455.1488 | 15.25 |
| 455.1788 | 16.25 |
| 455.2125 | 16.75 |
| 455.2438 | 17.75 |
| 455.2825 | 22    |
| 455.315  | 16.75 |
| 455.3463 | 18    |
| 455.3838 | 17    |
| 455.4163 | 15.5  |
| 455.4488 | 19.75 |
| 455.48   | 15.5  |
| 455.5138 | 21.5  |
| 455.5513 | 19.75 |
| 455.585  | 17.25 |
| 455.6163 | 17.75 |
| 455.6513 | 16.25 |
| 455.6813 | 19    |
| 455.715  | 19    |
| 455.7463 | 18.5  |
| 455.7825 | 21    |
| 455.82   | 15.5  |
| 455.8488 | 19.25 |
| 455.885  | 19    |
| 455.9175 | 21    |
| 455.95   | 24.75 |
| 455.98   | 18.25 |
| 456.0138 | 24    |
| 456.0513 | 20.75 |
| 456.085  | 21    |
| 456.1163 | 24.75 |
| 456.1513 | 27.5  |
| 456.1813 | 21    |
| 456.215  | 16    |
| 456.2463 | 20.25 |
| 456.2825 | 24.75 |
| 456.3175 | 17.5  |
| 456.3488 | 21.75 |
| 456.385  | 22    |
| 456.4175 | 17.25 |
| 456.45   | 22.75 |
| 456.48   | 19    |
| 456.5138 | 19.25 |
| 456.5513 | 20.75 |
| 456.585  | 27.75 |
| 456.6163 | 23    |
| 456.6513 | 20.5  |
| 456.6813 | 19    |
| 456.715  | 22    |
| 456.7463 | 18.75 |

|          |       |          |       |
|----------|-------|----------|-------|
| 456.7738 | 14.75 | 456.7825 | 19    |
| 456.8038 | 13.75 | 456.8175 | 16    |
| 456.8475 | 12.5  | 456.8488 | 20.75 |
| 456.8738 | 12    | 456.885  | 18.5  |
| 456.905  | 12.5  | 456.9175 | 18.25 |
| 456.94   | 13.25 | 456.95   | 17.25 |
| 456.9725 | 12.25 | 456.98   | 22    |
| 457.005  | 13.25 | 457.0138 | 20    |
| 457.0388 | 15.25 | 457.0513 | 21.5  |
| 457.07   | 13.25 | 457.085  | 19.5  |
| 457.11   | 10.75 | 457.1163 | 15.75 |
| 457.1425 | 14.25 | 457.1513 | 22    |
| 457.1725 | 11.5  | 457.1813 | 21.25 |
| 457.2063 | 9.25  | 457.215  | 19.75 |
| 457.2363 | 12    | 457.2488 | 20    |
| 457.2713 | 7.5   | 457.28   | 16    |
| 457.3038 | 10.75 | 457.32   | 24    |
| 457.3475 | 8.5   | 457.3513 | 15    |
| 457.3738 | 10.5  | 457.3838 | 19.75 |
| 457.405  | 12.25 | 457.4188 | 18.75 |
| 457.4388 | 13.5  | 457.4513 | 17.5  |
| 457.4725 | 14    | 457.4825 | 14.25 |
| 457.505  | 12.75 | 457.5175 | 16.75 |
| 457.5388 | 14    | 457.55   | 15.25 |
| 457.575  | 13.75 | 457.5863 | 16    |
| 457.61   | 10.5  | 457.6188 | 14.75 |
| 457.6425 | 16    | 457.6538 | 13.75 |
| 457.6725 | 13    | 457.6838 | 17    |
| 457.7063 | 14.5  | 457.7175 | 15.5  |
| 457.7363 | 16.75 | 457.75   | 17    |
| 457.7713 | 18    | 457.7825 | 14.5  |
| 457.8038 | 15.75 | 457.82   | 15.75 |
| 457.8425 | 11.5  | 457.8513 | 13.25 |
| 457.8738 | 14    | 457.8838 | 15.5  |
| 457.905  | 13.5  | 457.9188 | 13.75 |
| 457.9425 | 17.25 | 457.9513 | 15.5  |
| 457.9725 | 12    | 457.9825 | 18.75 |
| 458.005  | 15.25 | 458.0175 | 16.25 |
| 458.0388 | 15    | 458.05   | 14.75 |
| 458.075  | 12.5  | 458.0863 | 16.25 |
| 458.11   | 15    | 458.1188 | 14.25 |
| 458.1425 | 14    | 458.1538 | 18.75 |
| 458.1725 | 15.5  | 458.1838 | 15.5  |
| 458.2063 | 13    | 458.2175 | 15    |
| 458.2363 | 16.5  | 458.25   | 15.5  |
| 458.2713 | 17.5  | 458.2825 | 15.75 |
| 458.3038 | 14.75 | 458.32   | 17.75 |
| 458.3425 | 13.25 | 458.3513 | 17.75 |
| 458.3738 | 17    | 458.385  | 16.25 |
| 458.405  | 14.75 | 458.4188 | 16.5  |

|          |       |
|----------|-------|
| 458.4388 | 16    |
| 458.4725 | 15.5  |
| 458.5075 | 18.25 |
| 458.54   | 14.5  |
| 458.575  | 13.25 |
| 458.61   | 14.75 |
| 458.6425 | 19.5  |
| 458.6725 | 10.25 |
| 458.7063 | 12.75 |
| 458.7363 | 14.25 |
| 458.7713 | 12    |
| 458.8038 | 12.25 |
| 458.8425 | 11.5  |
| 458.875  | 13    |
| 458.9075 | 14.5  |
| 458.9425 | 17    |
| 458.975  | 12    |
| 459.0088 | 12.25 |
| 459.04   | 11    |
| 459.0763 | 16    |
| 459.1125 | 13.25 |
| 459.1463 | 13.25 |
| 459.1763 | 16.75 |
| 459.2075 | 15.75 |
| 459.2388 | 18.75 |
| 459.2738 | 16.75 |
| 459.3075 | 17.75 |
| 459.345  | 13.5  |
| 459.375  | 12.75 |
| 459.4063 | 17    |
| 459.4425 | 13.5  |
| 459.475  | 18.75 |
| 459.5088 | 16.25 |
| 459.54   | 16    |
| 459.5763 | 15.75 |
| 459.6125 | 19.5  |
| 459.645  | 15.75 |
| 459.6763 | 20.5  |
| 459.7125 | 20.25 |
| 459.7388 | 15.75 |
| 459.7738 | 17.25 |
| 459.8075 | 15    |
| 459.8463 | 16    |
| 459.875  | 17    |
| 459.9063 | 14.5  |
| 459.9425 | 21    |
| 459.975  | 16.75 |
| 460.0088 | 10    |
| 460.04   | 16.75 |
| 460.0763 | 15    |

|          |       |
|----------|-------|
| 458.4513 | 15.25 |
| 458.4825 | 15.75 |
| 458.5175 | 17    |
| 458.5488 | 17.75 |
| 458.5863 | 15.5  |
| 458.6188 | 20.25 |
| 458.6538 | 18.5  |
| 458.6838 | 16.25 |
| 458.7175 | 17.75 |
| 458.75   | 18.25 |
| 458.785  | 18.25 |
| 458.82   | 14.75 |
| 458.8513 | 14.25 |
| 458.885  | 15.25 |
| 458.9188 | 14.5  |
| 458.9513 | 11.5  |
| 458.9825 | 14.25 |
| 459.0175 | 12    |
| 459.0488 | 13    |
| 459.0863 | 16    |
| 459.1188 | 14.75 |
| 459.1538 | 12.25 |
| 459.1838 | 18.25 |
| 459.2175 | 17.75 |
| 459.25   | 16.5  |
| 459.285  | 19    |
| 459.32   | 14.75 |
| 459.3513 | 17.5  |
| 459.385  | 15.5  |
| 459.4188 | 14.5  |
| 459.4513 | 15.25 |
| 459.4825 | 18.25 |
| 459.5175 | 16.75 |
| 459.5488 | 14.75 |
| 459.5863 | 14.75 |
| 459.6188 | 15.75 |
| 459.6525 | 19.5  |
| 459.6838 | 16.5  |
| 459.7175 | 13.25 |
| 459.75   | 16.25 |
| 459.785  | 19.5  |
| 459.8175 | 14.5  |
| 459.8513 | 17    |
| 459.885  | 19.5  |
| 459.9213 | 15    |
| 459.9513 | 19.5  |
| 459.9825 | 13.75 |
| 460.0175 | 15    |
| 460.0488 | 17.25 |
| 460.0863 | 14.75 |

|          |       |
|----------|-------|
| 460.1125 | 14.75 |
| 460.145  | 13.25 |
| 460.1763 | 17.5  |
| 460.2075 | 14.25 |
| 460.2388 | 21.5  |
| 460.2738 | 18.25 |
| 460.3075 | 16    |
| 460.345  | 15.75 |
| 460.375  | 15    |
| 460.4063 | 16.75 |
| 460.4425 | 11.5  |
| 460.475  | 15    |
| 460.5088 | 15.75 |
| 460.54   | 15.75 |
| 460.5763 | 14.5  |
| 460.6125 | 15.75 |
| 460.645  | 18.5  |
| 460.6763 | 16.25 |
| 460.7075 | 14.25 |
| 460.7388 | 18.25 |
| 460.7738 | 18.75 |
| 460.8088 | 15    |
| 460.845  | 16.25 |
| 460.875  | 16.25 |
| 460.9063 | 15.75 |
| 460.94   | 15    |
| 460.975  | 13.5  |
| 461.0088 | 10.25 |
| 461.0425 | 13.75 |
| 461.0788 | 14    |
| 461.1125 | 13    |
| 461.145  | 12.75 |
| 461.1763 | 11.5  |
| 461.2075 | 9.75  |
| 461.2388 | 13.25 |
| 461.2738 | 12.5  |
| 461.3075 | 12.25 |
| 461.345  | 15.25 |
| 461.375  | 13.75 |
| 461.4088 | 11.5  |
| 461.44   | 12.5  |
| 461.475  | 14.25 |
| 461.5088 | 10.5  |
| 461.5425 | 11.75 |
| 461.5788 | 11.75 |
| 461.6125 | 12.5  |
| 461.645  | 15    |
| 461.6763 | 12.75 |
| 461.7075 | 11.25 |
| 461.7388 | 12    |

|          |       |
|----------|-------|
| 460.1188 | 15.5  |
| 460.1525 | 14.75 |
| 460.1838 | 17.75 |
| 460.2175 | 17.75 |
| 460.25   | 19.75 |
| 460.285  | 18.75 |
| 460.315  | 14.5  |
| 460.3513 | 15.25 |
| 460.385  | 16.5  |
| 460.4188 | 14.25 |
| 460.4513 | 13.25 |
| 460.4838 | 11.25 |
| 460.5175 | 17.25 |
| 460.5488 | 11.25 |
| 460.5863 | 16    |
| 460.6188 | 14.25 |
| 460.6538 | 13.5  |
| 460.6838 | 13.25 |
| 460.7175 | 14    |
| 460.75   | 13.5  |
| 460.785  | 14    |
| 460.815  | 14.75 |
| 460.8513 | 17    |
| 460.885  | 16.75 |
| 460.9188 | 14.75 |
| 460.9513 | 18.75 |
| 460.9838 | 15.5  |
| 461.0175 | 19.25 |
| 461.0488 | 19    |
| 461.0863 | 17.75 |
| 461.1188 | 17.25 |
| 461.1525 | 16.5  |
| 461.1838 | 16.25 |
| 461.2175 | 16.25 |
| 461.25   | 16.5  |
| 461.285  | 18.75 |
| 461.315  | 15.25 |
| 461.3513 | 15    |
| 461.385  | 16.25 |
| 461.4188 | 17.25 |
| 461.4513 | 14    |
| 461.4838 | 16    |
| 461.5188 | 15    |
| 461.5488 | 15    |
| 461.5863 | 15.25 |
| 461.6188 | 15.25 |
| 461.6525 | 16.5  |
| 461.6838 | 15.75 |
| 461.7175 | 18    |
| 461.75   | 17    |

|          |       |
|----------|-------|
| 461.7738 | 10.5  |
| 461.8075 | 11.75 |
| 461.845  | 11.25 |
| 461.875  | 11.25 |
| 461.9088 | 11.5  |
| 461.94   | 9.5   |
| 461.975  | 10    |
| 462.0088 | 10    |
| 462.0425 | 15.75 |
| 462.0788 | 13    |
| 462.1125 | 12.5  |
| 462.145  | 14    |
| 462.1763 | 13    |
| 462.2075 | 11.75 |
| 462.2388 | 12.75 |
| 462.275  | 13.75 |
| 462.3075 | 14.25 |
| 462.345  | 13    |
| 462.3775 | 15.25 |
| 462.4088 | 11.75 |
| 462.44   | 21.5  |
| 462.475  | 13.75 |
| 462.5088 | 12.5  |
| 462.5425 | 16.25 |
| 462.5788 | 14.5  |
| 462.6163 | 14.5  |
| 462.645  | 15.5  |
| 462.6763 | 13.75 |
| 462.7075 | 13.5  |
| 462.7388 | 11.5  |
| 462.775  | 10.25 |
| 462.8075 | 13    |
| 462.845  | 12.5  |
| 462.875  | 12.75 |
| 462.9088 | 14.5  |
| 462.94   | 12    |
| 462.975  | 14    |
| 463.0088 | 14    |
| 463.0425 | 12.25 |
| 463.0788 | 14.25 |
| 463.1125 | 12.5  |
| 463.1463 | 10.75 |
| 463.1763 | 12.5  |
| 463.21   | 12.25 |
| 463.2388 | 12.25 |
| 463.275  | 11.5  |
| 463.3075 | 12    |
| 463.3425 | 11    |
| 463.375  | 15.5  |
| 463.4088 | 14.5  |

|          |       |
|----------|-------|
| 461.785  | 13    |
| 461.815  | 14.25 |
| 461.8513 | 17    |
| 461.885  | 19    |
| 461.9163 | 17.5  |
| 461.9513 | 14.75 |
| 461.9838 | 16.75 |
| 462.0188 | 15.75 |
| 462.0488 | 11.75 |
| 462.0863 | 13.75 |
| 462.1213 | 14    |
| 462.1525 | 14.5  |
| 462.1838 | 17    |
| 462.2175 | 14.5  |
| 462.25   | 14.5  |
| 462.285  | 14.75 |
| 462.315  | 15.25 |
| 462.3513 | 18    |
| 462.385  | 15.75 |
| 462.4163 | 14    |
| 462.4538 | 18.75 |
| 462.4838 | 15.25 |
| 462.5188 | 14.25 |
| 462.5488 | 14    |
| 462.5825 | 14    |
| 462.6213 | 11    |
| 462.6525 | 15.25 |
| 462.6838 | 15.75 |
| 462.7175 | 13.25 |
| 462.75   | 13    |
| 462.785  | 19    |
| 462.815  | 21    |
| 462.8513 | 13.25 |
| 462.885  | 21.75 |
| 462.9163 | 18.75 |
| 462.9513 | 20.5  |
| 462.9838 | 19.25 |
| 463.0188 | 16.5  |
| 463.0488 | 17.25 |
| 463.0825 | 16.75 |
| 463.1213 | 19.5  |
| 463.1525 | 19.75 |
| 463.1838 | 19.5  |
| 463.2175 | 17.5  |
| 463.2525 | 14.75 |
| 463.285  | 23.5  |
| 463.315  | 17.75 |
| 463.3513 | 16.25 |
| 463.385  | 16.75 |
| 463.4163 | 10.25 |

|          |       |          |       |
|----------|-------|----------|-------|
| 463.44   | 13.75 | 463.4513 | 18.25 |
| 463.475  | 14.25 | 463.4838 | 14.5  |
| 463.5088 | 15    | 463.5188 | 20.25 |
| 463.5425 | 13.75 | 463.5488 | 15    |
| 463.5788 | 18.25 | 463.5825 | 20    |
| 463.6125 | 15.5  | 463.6213 | 17.5  |
| 463.6463 | 15.25 | 463.6525 | 14    |
| 463.6763 | 14.5  | 463.6838 | 17.75 |
| 463.7075 | 15.75 | 463.7175 | 18    |
| 463.7388 | 16.25 | 463.7525 | 16.75 |
| 463.775  | 15.5  | 463.785  | 17.25 |
| 463.81   | 14    | 463.815  | 18.75 |
| 463.8425 | 12    | 463.8513 | 19    |
| 463.875  | 15.5  | 463.885  | 13.25 |
| 463.9088 | 14.75 | 463.9163 | 11.75 |
| 463.94   | 12.25 | 463.9513 | 14.75 |
| 463.975  | 15.25 | 463.9838 | 17.25 |
| 464.0113 | 13.5  | 464.0188 | 15.5  |
| 464.0425 | 11.75 | 464.0488 | 16.5  |
| 464.0813 | 12.25 | 464.0825 | 19    |
| 464.1125 | 14.75 | 464.1213 | 20    |
| 464.1463 | 13    | 464.1525 | 19.5  |
| 464.1763 | 14.5  | 464.1825 | 17.5  |
| 464.2063 | 16.25 | 464.2175 | 21.75 |
| 464.2413 | 15.75 | 464.2525 | 18.75 |
| 464.2763 | 16    | 464.285  | 12.25 |
| 464.31   | 13.5  | 464.315  | 13.25 |
| 464.3425 | 12.25 | 464.3513 | 19.25 |
| 464.375  | 15    | 464.385  | 11.5  |
| 464.4088 | 12.25 | 464.4163 | 12.5  |
| 464.44   | 16    | 464.4513 | 16    |
| 464.475  | 15.75 | 464.4838 | 14    |
| 464.5113 | 15.5  | 464.5188 | 13.75 |
| 464.5425 | 11    | 464.5488 | 17.5  |
| 464.5788 | 13    | 464.5825 | 13    |
| 464.6125 | 12.75 | 464.6213 | 11.5  |
| 464.6463 | 14.5  | 464.6525 | 13.5  |
| 464.6763 | 13.75 | 464.6825 | 14.75 |
| 464.7063 | 13.75 | 464.72   | 14.75 |
| 464.7388 | 17.25 | 464.7525 | 14.25 |
| 464.775  | 12.75 | 464.785  | 15    |
| 464.81   | 15.75 | 464.815  | 16    |
| 464.8425 | 17    | 464.85   | 12.25 |
| 464.8788 | 16    | 464.885  | 15.5  |
| 464.9088 | 15    | 464.9163 | 16.75 |
| 464.94   | 14.5  | 464.9513 | 14    |
| 464.975  | 14.5  | 464.9838 | 13.5  |
| 465.0113 | 13.5  | 465.0188 | 13    |
| 465.0425 | 17.25 | 465.0488 | 19    |
| 465.0788 | 15.5  | 465.0825 | 16.25 |

|          |       |          |       |
|----------|-------|----------|-------|
| 465.1125 | 16.25 | 465.1213 | 20    |
| 465.1463 | 13.25 | 465.1525 | 19.5  |
| 465.1763 | 15.25 | 465.1825 | 22    |
| 465.2063 | 14.25 | 465.22   | 18.5  |
| 465.2413 | 16.5  | 465.2525 | 19.25 |
| 465.275  | 18.75 | 465.285  | 19.25 |
| 465.31   | 17.25 | 465.315  | 19.25 |
| 465.3425 | 17.5  | 465.3513 | 20    |
| 465.3775 | 15.75 | 465.385  | 20    |
| 465.4088 | 17.75 | 465.4163 | 20.75 |
| 465.4425 | 13    | 465.4513 | 19    |
| 465.475  | 17.5  | 465.4863 | 17.5  |
| 465.5113 | 15.25 | 465.5188 | 19.25 |
| 465.5425 | 16.25 | 465.5488 | 24.75 |
| 465.5788 | 15.25 | 465.5825 | 18.25 |
| 465.6125 | 14    | 465.6213 | 20.5  |
| 465.6463 | 12    | 465.6525 | 19.5  |
| 465.6763 | 13.25 | 465.6825 | 21.5  |
| 465.7063 | 13.75 | 465.72   | 17.75 |
| 465.7413 | 15.5  | 465.7525 | 17.5  |
| 465.775  | 17.25 | 465.785  | 15    |
| 465.81   | 17.75 | 465.815  | 22.5  |
| 465.8425 | 17    | 465.8513 | 22    |
| 465.8775 | 12.25 | 465.885  | 17.75 |
| 465.9088 | 18.25 | 465.9163 | 20.5  |
| 465.94   | 17.25 | 465.9488 | 15.75 |
| 465.975  | 16.25 | 465.9863 | 24.5  |
| 466.0113 | 17    | 466.0188 | 21.25 |
| 466.0425 | 17    | 466.0488 | 17.25 |
| 466.0788 | 12.75 | 466.0825 | 18.75 |
| 466.1125 | 17.25 | 466.1225 | 19.75 |
| 466.1463 | 16.75 | 466.1525 | 16.75 |
| 466.1763 | 15.5  | 466.1825 | 17.25 |
| 466.2063 | 18    | 466.22   | 15    |
| 466.2413 | 15    | 466.2525 | 16    |
| 466.275  | 16    | 466.285  | 19.75 |
| 466.31   | 16.5  | 466.315  | 19    |
| 466.3425 | 17.75 | 466.3513 | 14.5  |
| 466.3775 | 13.5  | 466.385  | 17.5  |
| 466.4088 | 12.25 | 466.4163 | 17.75 |
| 466.44   | 16.75 | 466.4488 | 21.75 |
| 466.4725 | 18.75 | 466.4863 | 20.75 |
| 466.5113 | 13.5  | 466.5188 | 19.5  |
| 466.5425 | 14    | 466.5488 | 21.75 |
| 466.5788 | 15.75 | 466.5825 | 13.75 |
| 466.6125 | 15.25 | 466.6225 | 18.5  |
| 466.6463 | 17.25 | 466.6525 | 16    |
| 466.6763 | 19.75 | 466.6825 | 19.75 |
| 466.7063 | 18.25 | 466.72   | 20.5  |
| 466.7413 | 20.25 | 466.7525 | 19.25 |



|          |       |
|----------|-------|
| 466.775  | 17    |
| 466.81   | 14.5  |
| 466.8425 | 15.75 |
| 466.8775 | 17.25 |
| 466.9088 | 19.5  |
| 466.94   | 15.5  |
| 466.9738 | 14.75 |
| 467.0088 | 16    |
| 467.0438 | 13    |
| 467.0788 | 15.75 |
| 467.11   | 18.75 |
| 467.1463 | 15.5  |
| 467.1763 | 15.75 |
| 467.2063 | 12.5  |
| 467.2413 | 16.5  |
| 467.2775 | 19.5  |
| 467.31   | 20.75 |
| 467.3425 | 17.5  |
| 467.3775 | 17.5  |
| 467.4088 | 19    |
| 467.44   | 15.75 |
| 467.4738 | 21.25 |
| 467.5088 | 17.75 |
| 467.5438 | 14.75 |
| 467.5788 | 13    |
| 467.61   | 17.5  |
| 467.6463 | 18.5  |
| 467.6763 | 21.25 |
| 467.7063 | 16.25 |
| 467.7413 | 11.25 |
| 467.7775 | 14.25 |
| 467.81   | 18    |
| 467.8425 | 17.5  |
| 467.8775 | 14.5  |
| 467.9088 | 13.75 |
| 467.94   | 21.75 |
| 467.9738 | 16.25 |
| 468.0088 | 12.75 |
| 468.0438 | 15    |
| 468.0763 | 13.5  |
| 468.1125 | 15.25 |
| 468.1463 | 14.25 |
| 468.1763 | 13.25 |
| 468.2063 | 15.75 |
| 468.2413 | 13.75 |
| 468.2775 | 17.75 |
| 468.31   | 19    |
| 468.3425 | 15.25 |
| 468.3775 | 15.25 |
| 468.4088 | 15.5  |

|          |       |
|----------|-------|
| 466.785  | 17.5  |
| 466.815  | 21    |
| 466.8513 | 21    |
| 466.885  | 18.75 |
| 466.9163 | 18.75 |
| 466.9488 | 17.25 |
| 466.9863 | 18.75 |
| 467.0188 | 19.5  |
| 467.0488 | 18.75 |
| 467.0825 | 22.5  |
| 467.1225 | 21.25 |
| 467.1525 | 22.25 |
| 467.1825 | 17.25 |
| 467.22   | 16.25 |
| 467.2525 | 19.5  |
| 467.285  | 18.75 |
| 467.315  | 21.5  |
| 467.3513 | 20.75 |
| 467.385  | 19.75 |
| 467.4163 | 18.25 |
| 467.4488 | 19    |
| 467.4863 | 16.75 |
| 467.5188 | 17.5  |
| 467.5488 | 19.25 |
| 467.5825 | 20.75 |
| 467.6225 | 17    |
| 467.6525 | 17.75 |
| 467.6825 | 18    |
| 467.7188 | 15.25 |
| 467.7525 | 19.25 |
| 467.785  | 19.75 |
| 467.815  | 21.25 |
| 467.8513 | 11    |
| 467.885  | 14.25 |
| 467.9163 | 17.75 |
| 467.95   | 17.25 |
| 467.9863 | 16    |
| 468.0188 | 16    |
| 468.0488 | 18    |
| 468.0825 | 18.25 |
| 468.12   | 16    |
| 468.155  | 16.5  |
| 468.1825 | 19    |
| 468.2188 | 18.75 |
| 468.2525 | 19.75 |
| 468.285  | 20.75 |
| 468.315  | 17.25 |
| 468.3513 | 16    |
| 468.385  | 21.5  |
| 468.4163 | 18.75 |

|          |       |          |       |
|----------|-------|----------|-------|
| 468.44   | 14.75 | 468.45   | 20    |
| 468.4738 | 14.5  | 468.4863 | 18    |
| 468.5088 | 14.75 | 468.5188 | 21.75 |
| 468.5438 | 12.5  | 468.5488 | 16.25 |
| 468.5763 | 18    | 468.585  | 19.5  |
| 468.6125 | 19    | 468.62   | 21.75 |
| 468.6463 | 12.75 | 468.6525 | 22.25 |
| 468.6763 | 16    | 468.6825 | 20    |
| 468.7088 | 18.75 | 468.7188 | 19.25 |
| 468.7413 | 13.75 | 468.7525 | 17.5  |
| 468.7775 | 14.75 | 468.785  | 23.75 |
| 468.81   | 13    | 468.815  | 17.5  |
| 468.8425 | 14.5  | 468.8513 | 18    |
| 468.8775 | 10.5  | 468.885  | 16.25 |
| 468.9088 | 13    | 468.9163 | 18.5  |
| 468.94   | 15.75 | 468.95   | 19.25 |
| 468.9738 | 12.75 | 468.9863 | 18.25 |
| 469.0088 | 14.75 | 469.0188 | 24.25 |
| 469.0438 | 13.25 | 469.0488 | 18.5  |
| 469.0763 | 16.25 | 469.0863 | 15.75 |
| 469.1125 | 12.5  | 469.12   | 16    |
| 469.1463 | 16.75 | 469.1525 | 19    |
| 469.1763 | 15.25 | 469.1825 | 15.5  |
| 469.2088 | 15    | 469.2188 | 16.25 |
| 469.2388 | 16    | 469.2525 | 17    |
| 469.28   | 14.25 | 469.285  | 19    |
| 469.31   | 11.75 | 469.315  | 14    |
| 469.3425 | 14    | 469.3513 | 14.5  |
| 469.38   | 16.75 | 469.385  | 19.25 |
| 469.4088 | 16    | 469.4163 | 15    |
| 469.44   | 18.75 | 469.45   | 16    |
| 469.4738 | 16.75 | 469.4863 | 15.25 |
| 469.5088 | 15.5  | 469.5188 | 20    |
| 469.5438 | 15.25 | 469.5488 | 13.25 |
| 469.5763 | 18.75 | 469.585  | 17.25 |
| 469.6125 | 15.75 | 469.62   | 14    |
| 469.6463 | 14.75 | 469.6525 | 18.25 |
| 469.6763 | 17.25 | 469.6825 | 17    |
| 469.7088 | 15.5  | 469.7188 | 19.5  |
| 469.7388 | 18.5  | 469.7525 | 16    |
| 469.78   | 13.25 | 469.785  | 15.25 |
| 469.81   | 14.75 | 469.815  | 18.75 |
| 469.8425 | 15.25 | 469.8513 | 19    |
| 469.8775 | 13.75 | 469.885  | 16    |
| 469.9088 | 12.75 | 469.9163 | 18.75 |
| 469.94   | 15    | 469.9525 | 21.25 |
| 469.9738 | 14.5  | 469.985  | 19.25 |
| 470.0088 | 18.5  | 470.0188 | 18.25 |
| 470.0438 | 11.75 | 470.0488 | 18.25 |
| 470.0763 | 14.25 | 470.085  | 18.25 |

|          |       |
|----------|-------|
| 470.1125 | 13.25 |
| 470.1475 | 13.75 |
| 470.1763 | 14    |
| 470.2088 | 12.75 |
| 470.2388 | 12    |
| 470.2775 | 11.75 |
| 470.31   | 14.5  |
| 470.3425 | 11.5  |
| 470.3775 | 11.75 |
| 470.4088 | 16.75 |
| 470.4413 | 15.25 |
| 470.4738 | 15    |
| 470.5088 | 14.5  |
| 470.5438 | 9     |
| 470.5763 | 12    |
| 470.6125 | 12.25 |
| 470.6463 | 10.25 |
| 470.6763 | 10.5  |
| 470.7088 | 16    |
| 470.7413 | 12.5  |
| 470.7775 | 18    |
| 470.81   | 14.5  |
| 470.8425 | 11.25 |
| 470.8775 | 11.75 |
| 470.9088 | 12.75 |
| 470.9413 | 13    |
| 470.9738 | 13.5  |
| 471.01   | 13.25 |
| 471.0438 | 12    |
| 471.0763 | 13    |
| 471.1125 | 14.5  |
| 471.1463 | 13.5  |
| 471.1763 | 17.25 |
| 471.2088 | 13    |
| 471.2388 | 14.75 |
| 471.2775 | 16.25 |
| 471.31   | 13.5  |
| 471.345  | 10.75 |
| 471.3775 | 9     |
| 471.4088 | 10.25 |
| 471.4413 | 10    |
| 471.4738 | 9.75  |
| 471.51   | 8     |
| 471.5438 | 17.25 |
| 471.5763 | 8.75  |
| 471.6125 | 10.25 |
| 471.6463 | 10.75 |
| 471.6763 | 9.25  |
| 471.7088 | 9.5   |
| 471.7388 | 13.5  |

|          |       |
|----------|-------|
| 470.12   | 18.25 |
| 470.1525 | 17.5  |
| 470.1825 | 18.5  |
| 470.2188 | 22.75 |
| 470.2525 | 19    |
| 470.285  | 19.25 |
| 470.315  | 22.5  |
| 470.3513 | 18.25 |
| 470.385  | 24.25 |
| 470.4163 | 24    |
| 470.4525 | 23    |
| 470.485  | 21.75 |
| 470.5188 | 21.25 |
| 470.5488 | 19.5  |
| 470.585  | 21    |
| 470.62   | 20    |
| 470.6525 | 21.25 |
| 470.6825 | 19    |
| 470.7188 | 21    |
| 470.7525 | 18    |
| 470.785  | 19.75 |
| 470.815  | 19.75 |
| 470.8513 | 19    |
| 470.885  | 20.25 |
| 470.9163 | 20    |
| 470.9525 | 21.75 |
| 470.985  | 14    |
| 471.0188 | 14.5  |
| 471.0488 | 18    |
| 471.085  | 16.75 |
| 471.12   | 20.25 |
| 471.1525 | 17.25 |
| 471.1825 | 17    |
| 471.2188 | 22    |
| 471.2525 | 18.5  |
| 471.285  | 22.75 |
| 471.315  | 20    |
| 471.3513 | 19.25 |
| 471.385  | 21.25 |
| 471.4163 | 21.75 |
| 471.4525 | 23.75 |
| 471.485  | 20    |
| 471.5188 | 21    |
| 471.5513 | 17    |
| 471.585  | 19.75 |
| 471.62   | 21.25 |
| 471.6525 | 20.75 |
| 471.685  | 22.5  |
| 471.7188 | 20.5  |
| 471.7525 | 16.25 |

|          |       |          |       |
|----------|-------|----------|-------|
| 471.7775 | 12    | 471.7863 | 17.25 |
| 471.81   | 11.75 | 471.8175 | 16.5  |
| 471.8425 | 9     | 471.8513 | 20.5  |
| 471.8775 | 8.75  | 471.885  | 21.5  |
| 471.9088 | 12.25 | 471.9163 | 18    |
| 471.9438 | 11.75 | 471.9525 | 15    |
| 471.9738 | 11    | 471.985  | 24    |
| 472.01   | 9.25  | 472.0188 | 20.25 |
| 472.0438 | 11.25 | 472.0488 | 16.25 |
| 472.0763 | 8.25  | 472.085  | 16.25 |
| 472.1125 | 9.75  | 472.12   | 18.25 |
| 472.1463 | 11.5  | 472.1525 | 18.75 |
| 472.1788 | 9.75  | 472.1863 | 18.25 |
| 472.2088 | 10.75 | 472.2188 | 15    |
| 472.2413 | 12.25 | 472.25   | 16.5  |
| 472.2775 | 8     | 472.285  | 18.25 |
| 472.31   | 10.5  | 472.3175 | 19    |
| 472.3413 | 7.75  | 472.3513 | 18.25 |
| 472.3775 | 10.75 | 472.3838 | 13.75 |
| 472.4088 | 11.5  | 472.4163 | 18.5  |
| 472.4413 | 9.25  | 472.4525 | 19    |
| 472.4738 | 8.5   | 472.485  | 17.5  |
| 472.5088 | 9.75  | 472.5188 | 19    |
| 472.5425 | 12.25 | 472.5488 | 19    |
| 472.5763 | 11    | 472.585  | 16.25 |
| 472.6125 | 12    | 472.62   | 16.5  |
| 472.6463 | 12.75 | 472.6525 | 17.75 |
| 472.6788 | 12.25 | 472.6863 | 20.5  |
| 472.7088 | 12.5  | 472.7188 | 14    |
| 472.7388 | 9.5   | 472.75   | 16.25 |
| 472.7775 | 13    | 472.785  | 23    |
| 472.81   | 10.5  | 472.8175 | 26.5  |
| 472.8413 | 12.75 | 472.8513 | 23.25 |
| 472.8775 | 10.5  | 472.8838 | 19.25 |
| 472.9088 | 11.25 | 472.9163 | 17    |
| 472.9413 | 8.25  | 472.9525 | 19.5  |
| 472.9738 | 10.25 | 472.985  | 16.75 |
| 473.0088 | 12.5  | 473.0188 | 16.5  |
| 473.045  | 9.75  | 473.0488 | 20.25 |
| 473.0788 | 13.25 | 473.085  | 15.75 |
| 473.1125 | 10.5  | 473.12   | 15.5  |
| 473.1463 | 10.75 | 473.1525 | 21.75 |
| 473.1788 | 9     | 473.1863 | 18    |
| 473.2088 | 13.75 | 473.2188 | 13.25 |
| 473.2413 | 13    | 473.25   | 17    |
| 473.2775 | 11.75 | 473.285  | 18    |
| 473.31   | 13.25 | 473.3175 | 17.75 |
| 473.3413 | 12    | 473.3538 | 17.25 |
| 473.3775 | 13.5  | 473.3838 | 16.25 |
| 473.4088 | 9.5   | 473.4163 | 12.25 |

|          |       |
|----------|-------|
| 473.4413 | 16.25 |
| 473.4738 | 13.25 |
| 473.5088 | 10.5  |
| 473.5425 | 11.75 |
| 473.5763 | 11    |
| 473.6125 | 12.25 |
| 473.6463 | 14.5  |
| 473.6788 | 13.25 |
| 473.7088 | 12.25 |
| 473.7413 | 13.5  |
| 473.7775 | 9.75  |
| 473.81   | 12.5  |
| 473.8413 | 13.75 |
| 473.8775 | 15    |
| 473.91   | 12.25 |
| 473.9413 | 10.25 |
| 473.9738 | 9     |
| 474.01   | 13    |
| 474.0425 | 12.75 |
| 474.0763 | 11.25 |
| 474.1125 | 13.25 |
| 474.1463 | 16    |
| 474.1788 | 11.25 |
| 474.2088 | 10    |
| 474.2413 | 12.5  |
| 474.2775 | 14.25 |
| 474.31   | 12.5  |
| 474.3425 | 12    |
| 474.38   | 13.75 |
| 474.4125 | 15    |
| 474.4438 | 10.25 |
| 474.4788 | 14    |
| 474.5163 | 19.75 |
| 474.5463 | 14.75 |
| 474.5813 | 15    |
| 474.6138 | 13.75 |
| 474.6488 | 15.25 |
| 474.6813 | 15    |
| 474.7113 | 16.25 |
| 474.745  | 18.25 |
| 474.7813 | 17    |
| 474.8125 | 15.5  |
| 474.845  | 14.5  |
| 474.8825 | 16.25 |
| 474.915  | 14.25 |
| 474.9463 | 16.25 |
| 474.98   | 14.75 |
| 475.0163 | 15.5  |
| 475.0463 | 13.75 |
| 475.0813 | 15.25 |

|          |       |
|----------|-------|
| 473.4525 | 15    |
| 473.485  | 16    |
| 473.5188 | 14.5  |
| 473.55   | 13.75 |
| 473.585  | 13    |
| 473.62   | 14.5  |
| 473.6525 | 17.75 |
| 473.6863 | 16.25 |
| 473.7188 | 11.75 |
| 473.75   | 16.75 |
| 473.785  | 13.5  |
| 473.8175 | 15.5  |
| 473.8538 | 16.75 |
| 473.8838 | 15.5  |
| 473.9163 | 14.75 |
| 473.9525 | 22.75 |
| 473.985  | 16.25 |
| 474.0175 | 19.5  |
| 474.05   | 17    |
| 474.085  | 15    |
| 474.12   | 18.75 |
| 474.1525 | 15.75 |
| 474.1863 | 16.75 |
| 474.2188 | 18.5  |
| 474.25   | 15    |
| 474.285  | 13.75 |
| 474.3175 | 14.75 |
| 474.3538 | 16    |
| 474.3838 | 14.25 |
| 474.4163 | 11.5  |
| 474.4525 | 11.25 |
| 474.485  | 11    |
| 474.5175 | 15    |
| 474.55   | 14    |
| 474.585  | 16.5  |
| 474.62   | 12.25 |
| 474.6525 | 13    |
| 474.6863 | 16.75 |
| 474.7188 | 19.25 |
| 474.75   | 13    |
| 474.785  | 18.5  |
| 474.8175 | 16.25 |
| 474.8538 | 21.75 |
| 474.8838 | 15.75 |
| 474.9188 | 16.5  |
| 474.9525 | 14.5  |
| 474.985  | 20.25 |
| 475.0175 | 16    |
| 475.05   | 15.75 |
| 475.085  | 16.25 |

|          |       |          |       |
|----------|-------|----------|-------|
| 475.1138 | 11.5  | 475.12   | 20.5  |
| 475.1488 | 10.5  | 475.1525 | 15    |
| 475.1813 | 13.25 | 475.1863 | 14.25 |
| 475.2113 | 9.25  | 475.2188 | 16.5  |
| 475.245  | 10.5  | 475.25   | 17    |
| 475.2813 | 10.5  | 475.2875 | 16.25 |
| 475.3125 | 8.75  | 475.3175 | 16.75 |
| 475.345  | 7.75  | 475.3538 | 19    |
| 475.3825 | 12.25 | 475.3838 | 17.5  |
| 475.415  | 12    | 475.4188 | 16.75 |
| 475.4463 | 11.75 | 475.4525 | 18.25 |
| 475.48   | 10    | 475.485  | 11.5  |
| 475.5138 | 11.75 | 475.5175 | 14    |
| 475.5463 | 8.5   | 475.55   | 15.5  |
| 475.5813 | 12.25 | 475.585  | 17.5  |
| 475.6113 | 11.75 | 475.62   | 16.25 |
| 475.6513 | 11.25 | 475.6525 | 20    |
| 475.6813 | 11.5  | 475.6863 | 21.25 |
| 475.7113 | 11.25 | 475.7188 | 18.75 |
| 475.745  | 10.75 | 475.75   | 17.75 |
| 475.7813 | 8.5   | 475.7875 | 17    |
| 475.8113 | 12.25 | 475.8175 | 14    |
| 475.845  | 14    | 475.8538 | 14    |
| 475.8825 | 13.75 | 475.8838 | 16.5  |
| 475.915  | 12.25 | 475.9188 | 16    |
| 475.9463 | 10.5  | 475.9525 | 12.25 |
| 475.98   | 8.25  | 475.985  | 14.5  |
| 476.0138 | 6.75  | 476.0175 | 15.75 |
| 476.0463 | 11    | 476.05   | 19    |
| 476.0813 | 8.25  | 476.085  | 13    |
| 476.1113 | 10.75 | 476.12   | 16.75 |
| 476.1513 | 11.25 | 476.1525 | 19.75 |
| 476.1813 | 10.75 | 476.1863 | 20.25 |
| 476.2113 | 11.75 | 476.2188 | 14.75 |
| 476.245  | 9.75  | 476.25   | 16.5  |
| 476.2813 | 11.25 | 476.285  | 16.5  |
| 476.3113 | 11.5  | 476.3175 | 16.75 |
| 476.345  | 12.25 | 476.355  | 17.5  |
| 476.3825 | 9.5   | 476.3875 | 16.75 |
| 476.415  | 14.25 | 476.4213 | 18.25 |
| 476.4463 | 12    | 476.4538 | 17.5  |
| 476.4813 | 12    | 476.4863 | 15    |
| 476.5138 | 9.75  | 476.52   | 18.75 |
| 476.5463 | 9.5   | 476.5513 | 17.75 |
| 476.5813 | 13.5  | 476.5875 | 19.5  |
| 476.615  | 14.25 | 476.6225 | 14.25 |
| 476.655  | 11.25 | 476.6538 | 13.75 |
| 476.6825 | 11.75 | 476.6888 | 15.25 |
| 476.715  | 11.75 | 476.7213 | 11.5  |
| 476.7475 | 11.25 | 476.7525 | 13.25 |

|          |       |          |       |
|----------|-------|----------|-------|
| 476.7838 | 6     | 476.7875 | 15.75 |
| 476.8138 | 10    | 476.82   | 12.25 |
| 476.8475 | 9     | 476.855  | 11.75 |
| 476.885  | 6.75  | 476.8875 | 13.5  |
| 476.9175 | 9.75  | 476.9213 | 15.25 |
| 476.9488 | 7.25  | 476.9538 | 12.5  |
| 476.9825 | 9.5   | 476.9863 | 13.5  |
| 477.015  | 8.75  | 477.02   | 13.75 |
| 477.0475 | 11.5  | 477.0513 | 11.75 |
| 477.08   | 10.25 | 477.09   | 14.25 |
| 477.115  | 12.5  | 477.1225 | 15.25 |
| 477.1525 | 10.75 | 477.155  | 12.25 |
| 477.1838 | 14.75 | 477.1888 | 12    |
| 477.215  | 9.5   | 477.2213 | 12    |
| 477.25   | 11.75 | 477.2525 | 12.5  |
| 477.2838 | 9.75  | 477.2875 | 16.5  |
| 477.3138 | 13.75 | 477.32   | 15.5  |
| 477.3475 | 12.75 | 477.355  | 14.25 |
| 477.385  | 11.75 | 477.3875 | 16.25 |
| 477.4175 | 10.5  | 477.4213 | 18.25 |
| 477.4488 | 14    | 477.4538 | 18.5  |
| 477.4825 | 12.75 | 477.4863 | 21.25 |
| 477.515  | 12    | 477.52   | 21    |
| 477.5475 | 14.5  | 477.5513 | 18    |
| 477.58   | 9.5   | 477.59   | 19.5  |
| 477.615  | 9.75  | 477.6225 | 21.5  |
| 477.6525 | 13.5  | 477.655  | 18.75 |
| 477.6825 | 11    | 477.6888 | 22    |
| 477.715  | 8.25  | 477.7238 | 17.75 |
| 477.75   | 11    | 477.7525 | 19.5  |
| 477.7838 | 7     | 477.7875 | 16.75 |
| 477.8138 | 11    | 477.82   | 20.5  |
| 477.8475 | 9     | 477.855  | 18    |
| 477.885  | 11    | 477.8875 | 17.5  |
| 477.9175 | 11.5  | 477.9213 | 21    |
| 477.9488 | 10.25 | 477.9538 | 19.25 |
| 477.9825 | 9.75  | 477.9863 | 19.75 |
| 478.015  | 10    | 478.02   | 19.25 |
| 478.0475 | 15.25 | 478.0513 | 19.5  |
| 478.08   | 12    | 478.09   | 19    |
| 478.115  | 11.75 | 478.1225 | 18.25 |
| 478.1525 | 9.5   | 478.155  | 20.75 |
| 478.1825 | 10.75 | 478.1888 | 14    |
| 478.215  | 12.25 | 478.2213 | 15.5  |
| 478.25   | 11.5  | 478.255  | 14.75 |
| 478.2838 | 10.75 | 478.2875 | 17.75 |
| 478.3138 | 7.5   | 478.32   | 13.5  |
| 478.35   | 8     | 478.355  | 16    |
| 478.3863 | 10.75 | 478.3875 | 15.25 |
| 478.4175 | 10    | 478.4213 | 15.5  |

|          |       |          |       |
|----------|-------|----------|-------|
| 478.45   | 11.75 | 478.4538 | 19.75 |
| 478.4825 | 9.5   | 478.4863 | 14.5  |
| 478.515  | 9.5   | 478.52   | 19.5  |
| 478.5475 | 10.75 | 478.5513 | 19    |
| 478.58   | 12.75 | 478.59   | 13    |
| 478.615  | 10.25 | 478.6225 | 11.5  |
| 478.6525 | 10    | 478.655  | 16.5  |
| 478.6825 | 9     | 478.6888 | 12.75 |
| 478.715  | 10.5  | 478.7213 | 15    |
| 478.75   | 6.75  | 478.755  | 14.5  |
| 478.7838 | 9.5   | 478.7875 | 14.25 |
| 478.8138 | 7.25  | 478.82   | 16    |
| 478.8488 | 9.5   | 478.855  | 18.25 |
| 478.8863 | 6.25  | 478.8875 | 15.25 |
| 478.9175 | 7     | 478.9213 | 16.75 |
| 478.95   | 7.5   | 478.9563 | 14.5  |
| 478.9825 | 10    | 478.9888 | 19.5  |
| 479.015  | 10.75 | 479.02   | 15.5  |
| 479.0475 | 9.75  | 479.05   | 14    |
| 479.08   | 10    | 479.09   | 14.75 |
| 479.115  | 10.75 | 479.1225 | 17.25 |
| 479.1525 | 10    | 479.155  | 19.5  |
| 479.1825 | 8.75  | 479.1888 | 16.5  |
| 479.215  | 10    | 479.2213 | 19.5  |
| 479.25   | 12    | 479.255  | 18    |
| 479.2825 | 10    | 479.2875 | 17.5  |
| 479.3138 | 9.5   | 479.3225 | 16    |
| 479.3488 | 12    | 479.355  | 14.25 |
| 479.3838 | 10.5  | 479.3875 | 13.75 |
| 479.4175 | 12    | 479.4213 | 17.25 |
| 479.45   | 13.75 | 479.4563 | 18.5  |
| 479.4838 | 13.25 | 479.49   | 16.75 |
| 479.515  | 9.5   | 479.5225 | 14.75 |
| 479.5475 | 11.75 | 479.555  | 20.75 |
| 479.58   | 12    | 479.5925 | 17.5  |
| 479.615  | 8     | 479.625  | 19.5  |
| 479.6525 | 14.25 | 479.6575 | 13    |
| 479.6825 | 11.25 | 479.6913 | 17.75 |
| 479.715  | 10.25 | 479.7225 | 15    |
| 479.75   | 13.25 | 479.7563 | 21.5  |
| 479.7825 | 12    | 479.7888 | 19    |
| 479.8138 | 15    | 479.8238 | 20    |
| 479.8488 | 12    | 479.8563 | 19.25 |
| 479.8838 | 12.75 | 479.8888 | 22.75 |
| 479.9175 | 11.25 | 479.9225 | 15.75 |
| 479.95   | 11.25 | 479.9563 | 22.75 |
| 479.9838 | 13.5  | 479.99   | 21.25 |
| 480.015  | 14    | 480.0225 | 19.75 |
| 480.0475 | 11.75 | 480.055  | 20    |
| 480.08   | 14.75 | 480.0925 | 19    |



|          |       |
|----------|-------|
| 480.1125 | 10    |
| 480.1525 | 7.75  |
| 480.1875 | 11.5  |
| 480.215  | 8.5   |
| 480.25   | 11.5  |
| 480.2825 | 11    |
| 480.3138 | 11.75 |
| 480.3488 | 12.75 |
| 480.3838 | 10    |
| 480.4175 | 14.5  |
| 480.45   | 10.75 |
| 480.4838 | 11.75 |
| 480.515  | 10    |
| 480.5475 | 13    |
| 480.58   | 10.75 |
| 480.6138 | 8.75  |
| 480.6525 | 7     |
| 480.685  | 10    |
| 480.7175 | 10.5  |
| 480.75   | 10.5  |
| 480.7825 | 9     |
| 480.8138 | 9.5   |
| 480.8488 | 9.25  |
| 480.8838 | 10    |
| 480.9175 | 6.25  |
| 480.95   | 7.5   |
| 480.9838 | 7.5   |
| 481.015  | 9.5   |
| 481.0475 | 7.75  |
| 481.08   | 9.25  |
| 481.1138 | 9.5   |
| 481.15   | 9.75  |
| 481.185  | 9.75  |
| 481.215  | 10.5  |
| 481.2513 | 10.75 |
| 481.2825 | 10.25 |
| 481.3138 | 9.75  |
| 481.3488 | 5     |
| 481.3813 | 9.25  |
| 481.4175 | 9     |
| 481.45   | 7.75  |
| 481.4838 | 10.25 |
| 481.515  | 13    |
| 481.5475 | 10.5  |
| 481.5825 | 11.25 |
| 481.6138 | 13.75 |
| 481.65   | 10    |
| 481.685  | 11.5  |
| 481.715  | 11.25 |
| 481.7538 | 11.5  |

|          |       |
|----------|-------|
| 480.125  | 23    |
| 480.1575 | 20.25 |
| 480.1913 | 19.75 |
| 480.2225 | 20.25 |
| 480.2563 | 18    |
| 480.2888 | 24    |
| 480.3238 | 16.5  |
| 480.3563 | 20.5  |
| 480.3913 | 18.5  |
| 480.4225 | 21.5  |
| 480.4563 | 18.5  |
| 480.49   | 19    |
| 480.5225 | 19.75 |
| 480.555  | 19.5  |
| 480.5925 | 15.75 |
| 480.625  | 20    |
| 480.6575 | 16.75 |
| 480.6913 | 18.75 |
| 480.725  | 18.75 |
| 480.7563 | 18.25 |
| 480.7888 | 16    |
| 480.8238 | 19.75 |
| 480.8563 | 21.75 |
| 480.8913 | 18    |
| 480.9225 | 15.25 |
| 480.9563 | 15    |
| 480.99   | 17.75 |
| 481.0225 | 17    |
| 481.055  | 17.5  |
| 481.0925 | 13.25 |
| 481.125  | 15    |
| 481.1575 | 17.5  |
| 481.1913 | 16.5  |
| 481.225  | 19.25 |
| 481.2563 | 17.25 |
| 481.2913 | 16.75 |
| 481.3238 | 15.75 |
| 481.3563 | 16.5  |
| 481.3913 | 18.25 |
| 481.4225 | 18    |
| 481.4563 | 19    |
| 481.49   | 15.5  |
| 481.5225 | 18.75 |
| 481.555  | 16.5  |
| 481.5925 | 17.75 |
| 481.625  | 15.5  |
| 481.6575 | 12.75 |
| 481.6913 | 16    |
| 481.725  | 13.75 |
| 481.7563 | 14    |

|          |       |          |       |
|----------|-------|----------|-------|
| 481.7838 | 11    | 481.7913 | 18.25 |
| 481.815  | 13.5  | 481.8238 | 16.5  |
| 481.85   | 9     | 481.8563 | 15.75 |
| 481.885  | 11    | 481.8913 | 12.75 |
| 481.9213 | 12.5  | 481.9225 | 16.75 |
| 481.9513 | 11.5  | 481.9588 | 13    |
| 481.985  | 10.75 | 481.99   | 17.5  |
| 482.0175 | 10    | 482.0225 | 14    |
| 482.05   | 11.75 | 482.055  | 12.25 |
| 482.085  | 13    | 482.0925 | 14    |
| 482.1163 | 13.75 | 482.125  | 14    |
| 482.1525 | 10.75 | 482.1575 | 12.5  |
| 482.1888 | 12    | 482.1913 | 15.5  |
| 482.22   | 10.75 | 482.225  | 13.5  |
| 482.2525 | 11    | 482.2563 | 13.5  |
| 482.2838 | 11    | 482.2913 | 13.5  |
| 482.315  | 8.25  | 482.3238 | 11.75 |
| 482.3513 | 12    | 482.3563 | 20.5  |
| 482.385  | 11.75 | 482.3913 | 16    |
| 482.4213 | 10.25 | 482.4225 | 15    |
| 482.4513 | 9     | 482.4575 | 17.5  |
| 482.485  | 9.5   | 482.49   | 20.25 |
| 482.5175 | 9     | 482.5225 | 17.75 |
| 482.5475 | 7     | 482.555  | 18    |
| 482.585  | 10.25 | 482.5925 | 13.25 |
| 482.6163 | 11    | 482.625  | 20    |
| 482.6525 | 12    | 482.6575 | 15.25 |
| 482.6875 | 10    | 482.6888 | 17.25 |
| 482.72   | 10.5  | 482.725  | 15.5  |
| 482.7525 | 9.25  | 482.7563 | 17.25 |
| 482.7838 | 10.75 | 482.7913 | 14.75 |
| 482.815  | 11.5  | 482.8238 | 17.75 |
| 482.8525 | 13.25 | 482.8563 | 17.5  |
| 482.885  | 9.75  | 482.8913 | 23    |
| 482.9213 | 12.25 | 482.9225 | 20.75 |
| 482.9513 | 10    | 482.9575 | 17.75 |
| 482.985  | 11.25 | 482.99   | 15    |
| 483.0175 | 9.75  | 483.0225 | 18.25 |
| 483.0475 | 10.5  | 483.055  | 18    |
| 483.085  | 10.75 | 483.0925 | 16.25 |
| 483.1163 | 12    | 483.125  | 25.5  |
| 483.1513 | 8.75  | 483.1575 | 20.75 |
| 483.1875 | 8     | 483.1888 | 21.75 |
| 483.22   | 7.5   | 483.225  | 16    |
| 483.2525 | 11.25 | 483.2588 | 17.25 |
| 483.2838 | 9.5   | 483.2913 | 17.75 |
| 483.315  | 6.5   | 483.3238 | 16.75 |
| 483.3525 | 5.75  | 483.3563 | 17.75 |
| 483.385  | 6.5   | 483.3913 | 17    |
| 483.4213 | 6.25  | 483.4225 | 19.75 |

|          |       |          |       |
|----------|-------|----------|-------|
| 483.4513 | 7     | 483.4575 | 16    |
| 483.485  | 9     | 483.49   | 15    |
| 483.5175 | 8     | 483.5225 | 16.25 |
| 483.5475 | 9.25  | 483.555  | 16.75 |
| 483.585  | 8.75  | 483.5925 | 16.25 |
| 483.6163 | 9.5   | 483.6275 | 13.75 |
| 483.6513 | 12    | 483.6575 | 17    |
| 483.6875 | 7.25  | 483.6913 | 14    |
| 483.72   | 8.5   | 483.725  | 18.25 |
| 483.7525 | 10.5  | 483.7588 | 17.25 |
| 483.7838 | 9.75  | 483.7913 | 14    |
| 483.8163 | 9.5   | 483.8238 | 16    |
| 483.8525 | 10    | 483.8563 | 13.75 |
| 483.885  | 12    | 483.8913 | 13.5  |
| 483.9213 | 12.25 | 483.9225 | 17.25 |
| 483.9513 | 12.25 | 483.9575 | 18    |
| 483.985  | 12.25 | 483.99   | 16    |
| 484.0175 | 11.25 | 484.0238 | 19    |
| 484.0475 | 10    | 484.055  | 22    |
| 484.085  | 10.5  | 484.0913 | 20    |
| 484.1163 | 11.25 | 484.1275 | 17    |
| 484.1525 | 9.75  | 484.16   | 14.5  |
| 484.1875 | 8.5   | 484.1913 | 14.5  |
| 484.22   | 12.75 | 484.225  | 13.25 |
| 484.2525 | 10    | 484.2588 | 18.75 |
| 484.2838 | 11.75 | 484.2913 | 15.75 |
| 484.3163 | 11.5  | 484.3238 | 15    |
| 484.3525 | 14.25 | 484.3563 | 15    |
| 484.385  | 10.5  | 484.3913 | 19.5  |
| 484.4238 | 11.5  | 484.4225 | 16.5  |
| 484.455  | 11.25 | 484.4575 | 15.5  |
| 484.4875 | 10    | 484.49   | 18.25 |
| 484.52   | 13    | 484.5238 | 19.25 |
| 484.5513 | 12.25 | 484.555  | 20.75 |
| 484.5888 | 11.25 | 484.5913 | 18.25 |
| 484.6188 | 12.25 | 484.6275 | 20.5  |
| 484.655  | 9.25  | 484.6575 | 17.75 |
| 484.69   | 12.25 | 484.6913 | 16.5  |
| 484.7225 | 11.75 | 484.725  | 20.5  |
| 484.755  | 14    | 484.7588 | 17.25 |
| 484.785  | 12.75 | 484.7913 | 18.75 |
| 484.8188 | 13.5  | 484.8238 | 18.5  |
| 484.8538 | 12.5  | 484.8563 | 14.75 |
| 484.8863 | 12.75 | 484.8913 | 20.75 |
| 484.9213 | 10.75 | 484.925  | 18.5  |
| 484.955  | 14.5  | 484.9575 | 17.75 |
| 484.9875 | 16.5  | 484.99   | 17.5  |
| 485.02   | 13.75 | 485.0238 | 18.25 |
| 485.0513 | 11.75 | 485.055  | 17.5  |
| 485.0888 | 10.75 | 485.0913 | 26.5  |

|          |       |          |       |
|----------|-------|----------|-------|
| 485.1188 | 9.75  | 485.1275 | 24.25 |
| 485.155  | 9.75  | 485.1575 | 17.25 |
| 485.19   | 8.75  | 485.1913 | 17.75 |
| 485.2225 | 9.25  | 485.225  | 18.75 |
| 485.2538 | 8.75  | 485.2588 | 17.5  |
| 485.285  | 9     | 485.2913 | 18.25 |
| 485.3188 | 9.75  | 485.3238 | 19.5  |
| 485.3538 | 9.5   | 485.3563 | 17    |
| 485.3863 | 9.25  | 485.3913 | 19.75 |
| 485.4188 | 10.75 | 485.425  | 15    |
| 485.455  | 8.75  | 485.4575 | 19    |
| 485.4875 | 10.5  | 485.49   | 18    |
| 485.52   | 9     | 485.5238 | 14.5  |
| 485.5513 | 7.75  | 485.555  | 17.25 |
| 485.5888 | 8.5   | 485.5913 | 18.5  |
| 485.6188 | 6.5   | 485.6275 | 19    |
| 485.655  | 9.25  | 485.6575 | 19.75 |
| 485.69   | 11    | 485.6913 | 16    |
| 485.7225 | 9.25  | 485.725  | 20    |
| 485.7538 | 12.5  | 485.7588 | 14.5  |
| 485.785  | 13.75 | 485.7913 | 16.25 |
| 485.8188 | 10.5  | 485.8238 | 14.75 |
| 485.8538 | 9     | 485.8563 | 15.25 |
| 485.885  | 11.5  | 485.8913 | 16.5  |
| 485.9188 | 13.25 | 485.925  | 21    |
| 485.955  | 10.75 | 485.96   | 19.5  |
| 485.9875 | 12.5  | 485.99   | 19.25 |
| 486.02   | 11    | 486.0238 | 19    |
| 486.0513 | 10.25 | 486.055  | 19.75 |
| 486.0888 | 13.5  | 486.0913 | 19    |
| 486.1188 | 11    | 486.1275 | 20.25 |
| 486.155  | 10.5  | 486.1588 | 19.75 |
| 486.19   | 14    | 486.1913 | 17.75 |
| 486.2225 | 10.25 | 486.225  | 18.75 |
| 486.2538 | 11.25 | 486.2588 | 19    |
| 486.2875 | 10    | 486.2913 | 15.75 |
| 486.3175 | 11    | 486.3238 | 17.5  |
| 486.3538 | 10.75 | 486.3563 | 17.75 |
| 486.3875 | 12    | 486.3913 | 18.75 |
| 486.4188 | 10.25 | 486.425  | 18.5  |
| 486.455  | 9.5   | 486.4575 | 19.75 |
| 486.4875 | 10    | 486.4913 | 17.75 |
| 486.52   | 9.5   | 486.5238 | 20.5  |
| 486.5513 | 8.5   | 486.555  | 19    |
| 486.5888 | 11.25 | 486.5913 | 23.25 |
| 486.6188 | 13.25 | 486.6275 | 24.25 |
| 486.655  | 11.25 | 486.6588 | 18.5  |
| 486.6913 | 7.5   | 486.6913 | 16    |
| 486.7225 | 8.5   | 486.725  | 20.5  |
| 486.7538 | 7.5   | 486.76   | 20.75 |

|          |       |          |       |
|----------|-------|----------|-------|
| 486.7875 | 11    | 486.7925 | 18.5  |
| 486.8175 | 8.25  | 486.825  | 16.25 |
| 486.8538 | 10.5  | 486.86   | 18.25 |
| 486.8875 | 10.75 | 486.8925 | 22    |
| 486.9188 | 9.75  | 486.9263 | 21    |
| 486.955  | 7.25  | 486.9588 | 24.5  |
| 486.9875 | 9.25  | 486.9938 | 18    |
| 487.02   | 9.5   | 487.0263 | 21.25 |
| 487.0513 | 9     | 487.0575 | 18.75 |
| 487.0888 | 8.75  | 487.0963 | 19    |
| 487.1188 | 8.25  | 487.13   | 18    |
| 487.155  | 9.75  | 487.1613 | 19.25 |
| 487.1925 | 8     | 487.1938 | 17.5  |
| 487.2225 | 10.5  | 487.2275 | 19.5  |
| 487.2538 | 11.25 | 487.26   | 22.75 |
| 487.2875 | 9     | 487.2925 | 16.75 |
| 487.3175 | 5.5   | 487.325  | 23.75 |
| 487.3538 | 8     | 487.3625 | 21.5  |
| 487.3888 | 7.5   | 487.395  | 20    |
| 487.4188 | 11    | 487.4263 | 19.75 |
| 487.455  | 6.5   | 487.4588 | 18.75 |
| 487.4875 | 12.25 | 487.4938 | 20.25 |
| 487.52   | 9.25  | 487.5263 | 16.5  |
| 487.5513 | 7.75  | 487.5588 | 21    |
| 487.5888 | 9.5   | 487.5963 | 15.5  |
| 487.6188 | 9.25  | 487.63   | 19    |
| 487.655  | 6.5   | 487.6613 | 18.25 |
| 487.6913 | 8.25  | 487.6938 | 16.25 |
| 487.7225 | 6.25  | 487.7275 | 22.25 |
| 487.7538 | 5.5   | 487.76   | 20.25 |
| 487.7888 | 9     | 487.7925 | 21.75 |
| 487.82   | 7.5   | 487.825  | 17.25 |
| 487.8538 | 11.25 | 487.8625 | 20    |
| 487.8888 | 6.5   | 487.895  | 16.75 |
| 487.9188 | 7.75  | 487.9263 | 17.25 |
| 487.955  | 7.5   | 487.9588 | 16.25 |
| 487.9875 | 6.5   | 487.9938 | 20.5  |
| 488.02   | 7.75  | 488.0263 | 17.25 |
| 488.0513 | 7.75  | 488.0588 | 12    |
| 488.0888 | 6.25  | 488.0963 | 16.25 |
| 488.1188 | 9.75  | 488.13   | 18    |
| 488.155  | 11    | 488.1613 | 21.25 |
| 488.1888 | 11.75 | 488.1938 | 19.25 |
| 488.2225 | 9.25  | 488.2275 | 19.25 |
| 488.2538 | 8.5   | 488.26   | 22.5  |
| 488.2875 | 9.75  | 488.2925 | 18.25 |
| 488.32   | 12.5  | 488.325  | 18.75 |
| 488.3538 | 8     | 488.36   | 20    |
| 488.3888 | 9.75  | 488.3975 | 19.5  |
| 488.4213 | 10.25 | 488.4263 | 21.25 |

|          |       |          |       |
|----------|-------|----------|-------|
| 488.455  | 5.75  | 488.4575 | 17.5  |
| 488.4875 | 9.75  | 488.4938 | 20.75 |
| 488.52   | 8.5   | 488.5263 | 21.25 |
| 488.5513 | 10    | 488.5588 | 15    |
| 488.5888 | 11.25 | 488.5963 | 18.75 |
| 488.6188 | 11.25 | 488.6313 | 17.75 |
| 488.655  | 10.5  | 488.6613 | 16.5  |
| 488.6888 | 11    | 488.6938 | 19.5  |
| 488.7225 | 10    | 488.7275 | 18.75 |
| 488.7538 | 10    | 488.76   | 19    |
| 488.7875 | 12.75 | 488.7925 | 19.75 |
| 488.8213 | 9     | 488.825  | 18    |
| 488.8538 | 8     | 488.86   | 17.25 |
| 488.8888 | 10.75 | 488.895  | 16.25 |
| 488.9213 | 9.5   | 488.9263 | 18.5  |
| 488.955  | 8     | 488.9575 | 20.75 |
| 488.9875 | 8.5   | 488.9938 | 14.5  |
| 489.02   | 10.75 | 489.0263 | 14.75 |
| 489.0513 | 11.75 | 489.0588 | 14    |
| 489.0888 | 7     | 489.0963 | 16    |
| 489.1188 | 10.5  | 489.1313 | 18.25 |
| 489.155  | 8.25  | 489.1613 | 16.75 |
| 489.1875 | 9.5   | 489.1938 | 15    |
| 489.2225 | 9.75  | 489.23   | 13.5  |
| 489.255  | 10    | 489.26   | 16    |
| 489.2875 | 8.75  | 489.2925 | 14.75 |
| 489.32   | 7.5   | 489.325  | 13.5  |
| 489.3538 | 8     | 489.36   | 15.25 |
| 489.3888 | 7.5   | 489.395  | 11    |
| 489.4225 | 9.75  | 489.4263 | 16.25 |
| 489.455  | 10.75 | 489.4575 | 14.75 |
| 489.4875 | 5.25  | 489.4938 | 14.5  |
| 489.5213 | 9.75  | 489.5263 | 11.75 |
| 489.5513 | 7.75  | 489.5588 | 13.75 |
| 489.5888 | 9.5   | 489.5963 | 14.25 |
| 489.6188 | 8.25  | 489.6313 | 11.5  |
| 489.655  | 10.5  | 489.6613 | 18    |
| 489.6875 | 7     | 489.6938 | 15.5  |
| 489.7225 | 12.25 | 489.73   | 22    |
| 489.7538 | 11.5  | 489.76   | 14.75 |
| 489.7875 | 6.75  | 489.7925 | 18.25 |
| 489.82   | 9.75  | 489.825  | 14    |
| 489.8538 | 10.25 | 489.8625 | 13.5  |
| 489.8913 | 9.25  | 489.895  | 14.75 |
| 489.9213 | 11.75 | 489.9263 | 14    |
| 489.955  | 11    | 489.9575 | 10    |
| 489.9875 | 12.75 | 489.9938 | 18.25 |
| 490.0213 | 13    | 490.0263 | 16.75 |
| 490.0525 | 11.75 | 490.0588 | 16.25 |
| 490.0888 | 11.75 | 490.0963 | 15.5  |

|          |       |          |       |
|----------|-------|----------|-------|
| 490.12   | 9.75  | 490.1313 | 13.5  |
| 490.1588 | 9.25  | 490.1613 | 14    |
| 490.19   | 11.25 | 490.1938 | 19    |
| 490.225  | 10.75 | 490.23   | 19.75 |
| 490.255  | 8.5   | 490.26   | 20.25 |
| 490.2888 | 10    | 490.2925 | 16.5  |
| 490.3238 | 9.5   | 490.325  | 15.5  |
| 490.355  | 6     | 490.3625 | 21.25 |
| 490.39   | 7     | 490.395  | 17.25 |
| 490.4225 | 8     | 490.4263 | 12.5  |
| 490.4563 | 6.75  | 490.4575 | 17.25 |
| 490.49   | 7.5   | 490.4938 | 16.75 |
| 490.5238 | 7.25  | 490.5263 | 17.5  |
| 490.555  | 9.25  | 490.5588 | 19.75 |
| 490.5913 | 7.5   | 490.5963 | 19    |
| 490.6225 | 8.5   | 490.6313 | 19.75 |
| 490.6588 | 10.75 | 490.6613 | 13.75 |
| 490.69   | 9.75  | 490.6938 | 15    |
| 490.725  | 9.5   | 490.7325 | 18    |
| 490.755  | 8.75  | 490.76   | 15.5  |
| 490.7888 | 6     | 490.7925 | 15.5  |
| 490.8238 | 11.5  | 490.8275 | 14.5  |
| 490.855  | 8.25  | 490.8625 | 15    |
| 490.89   | 6.5   | 490.895  | 14.25 |
| 490.9225 | 7.5   | 490.9263 | 14    |
| 490.9563 | 9.25  | 490.9575 | 15.5  |
| 490.99   | 6.75  | 490.9938 | 16.75 |
| 491.0238 | 8.75  | 491.0263 | 13.25 |
| 491.055  | 8.5   | 491.0588 | 14.5  |
| 491.0913 | 7.75  | 491.0963 | 15.5  |
| 491.1225 | 8.75  | 491.1313 | 16.75 |
| 491.1588 | 8.5   | 491.1613 | 14.25 |
| 491.19   | 5     | 491.1938 | 13    |
| 491.225  | 8.75  | 491.23   | 13.25 |
| 491.255  | 9.25  | 491.26   | 15    |
| 491.2888 | 8.5   | 491.295  | 16    |
| 491.3213 | 6.75  | 491.3275 | 15.75 |
| 491.355  | 8.5   | 491.3625 | 15.5  |
| 491.39   | 7.5   | 491.395  | 17.5  |
| 491.4225 | 6.5   | 491.4263 | 12.75 |
| 491.4563 | 10.25 | 491.46   | 13.5  |
| 491.49   | 8     | 491.4938 | 14.75 |
| 491.5238 | 10.25 | 491.5263 | 14.25 |
| 491.555  | 7     | 491.5588 | 13.25 |
| 491.5913 | 8.75  | 491.5988 | 13    |
| 491.6225 | 9.75  | 491.63   | 13.75 |
| 491.6588 | 8     | 491.6613 | 12.25 |
| 491.69   | 10.25 | 491.6938 | 15.5  |
| 491.725  | 10.25 | 491.73   | 12.5  |
| 491.7563 | 8     | 491.76   | 13.25 |

|          |       |          |       |
|----------|-------|----------|-------|
| 491.7888 | 7.75  | 491.795  | 14.25 |
| 491.8213 | 7.25  | 491.8275 | 15.5  |
| 491.855  | 9.5   | 491.8625 | 18.25 |
| 491.89   | 5.75  | 491.895  | 17.5  |
| 491.9225 | 7.5   | 491.9263 | 12    |
| 491.9563 | 7.75  | 491.96   | 12.75 |
| 491.99   | 7     | 491.9938 | 15    |
| 492.0238 | 6.75  | 492.0263 | 15.5  |
| 492.055  | 5.75  | 492.0588 | 15.25 |
| 492.0913 | 7.5   | 492.0988 | 19.25 |
| 492.1225 | 5.25  | 492.13   | 23.75 |
| 492.1588 | 8.5   | 492.1613 | 15.5  |
| 492.19   | 5.25  | 492.1938 | 15.25 |
| 492.225  | 5.25  | 492.2275 | 18    |
| 492.255  | 7.25  | 492.26   | 15.5  |
| 492.2888 | 6.25  | 492.295  | 17.5  |
| 492.3213 | 6.75  | 492.3275 | 13.75 |
| 492.355  | 6.5   | 492.3625 | 18.75 |
| 492.3925 | 5.5   | 492.395  | 16.25 |
| 492.4225 | 5.5   | 492.4263 | 16    |
| 492.4563 | 7     | 492.46   | 18    |
| 492.49   | 6.75  | 492.4938 | 20    |
| 492.5238 | 8     | 492.5263 | 14.5  |
| 492.555  | 7.75  | 492.5588 | 16.25 |
| 492.5913 | 8.5   | 492.5988 | 17.25 |
| 492.6225 | 11.75 | 492.63   | 18.25 |
| 492.6588 | 7.5   | 492.6613 | 13    |
| 492.69   | 10    | 492.6938 | 15.25 |
| 492.725  | 11.5  | 492.7275 | 18.75 |
| 492.755  | 7.25  | 492.76   | 17    |
| 492.7888 | 6     | 492.795  | 17.25 |
| 492.8213 | 7.5   | 492.8275 | 15.75 |
| 492.855  | 7.75  | 492.8625 | 33.75 |
| 492.8925 | 8     | 492.895  | 27.75 |
| 492.9225 | 7.5   | 492.9263 | 22.5  |
| 492.955  | 7.5   | 492.96   | 33.75 |
| 492.99   | 9.25  | 492.9938 | 42.25 |
| 493.0238 | 8.75  | 493.0263 | 23.25 |
| 493.055  | 9.5   | 493.0588 | 21    |
| 493.0913 | 7.75  | 493.0988 | 26.5  |
| 493.1225 | 7.75  | 493.13   | 19.75 |
| 493.1588 | 8.5   | 493.1613 | 18.25 |
| 493.19   | 9.75  | 493.1938 | 20    |
| 493.225  | 5     | 493.2275 | 28.25 |
| 493.255  | 8.5   | 493.26   | 20.75 |
| 493.2888 | 9     | 493.295  | 36    |
| 493.3213 | 9     | 493.33   | 22.25 |
| 493.355  | 9.25  | 493.3625 | 42.5  |
| 493.3925 | 8.75  | 493.395  | 54    |
| 493.4225 | 10.5  | 493.4263 | 19.75 |



|          |       |          |       |
|----------|-------|----------|-------|
| 493.4563 | 8.25  | 493.46   | 45.75 |
| 493.49   | 10    | 493.4938 | 44.25 |
| 493.5238 | 10.25 | 493.5263 | 19.5  |
| 493.555  | 10.25 | 493.5588 | 18.25 |
| 493.5913 | 10.5  | 493.5988 | 18    |
| 493.6225 | 10    | 493.63   | 16.25 |
| 493.6588 | 10.5  | 493.6613 | 22.25 |
| 493.69   | 8.5   | 493.695  | 19    |
| 493.725  | 10.5  | 493.7275 | 17.5  |
| 493.755  | 10.75 | 493.76   | 20.25 |
| 493.7913 | 10    | 493.795  | 19.75 |
| 493.8213 | 8.75  | 493.83   | 16.75 |
| 493.855  | 11    | 493.8625 | 15.75 |
| 493.8925 | 7.5   | 493.895  | 19    |
| 493.9225 | 10.5  | 493.9263 | 19.25 |
| 493.955  | 10.25 | 493.96   | 24.5  |
| 493.99   | 10.25 | 493.9938 | 24.25 |
| 494.0238 | 8.25  | 494.0263 | 24.5  |
| 494.055  | 8.75  | 494.0588 | 18.5  |
| 494.0913 | 11.25 | 494.0988 | 20.5  |
| 494.1225 | 10.75 | 494.13   | 25.75 |
| 494.1588 | 14    | 494.1613 | 21.5  |
| 494.19   | 14.25 | 494.195  | 20.5  |
| 494.225  | 11.75 | 494.2275 | 17.25 |
| 494.2575 | 9.75  | 494.26   | 23.25 |
| 494.2913 | 15.5  | 494.295  | 21.25 |
| 494.3213 | 11.75 | 494.33   | 21.25 |
| 494.355  | 12.75 | 494.3625 | 35    |
| 494.3925 | 10    | 494.3925 | 24.5  |
| 494.4225 | 12.25 | 494.4263 | 18.5  |
| 494.455  | 12    | 494.46   | 20.75 |
| 494.49   | 13.75 | 494.4938 | 17.5  |
| 494.5238 | 12.25 | 494.5263 | 17.5  |
| 494.555  | 11.75 | 494.5588 | 16    |
| 494.5913 | 9.75  | 494.5988 | 15.75 |
| 494.6263 | 11.75 | 494.63   | 20    |
| 494.6613 | 10.5  | 494.6613 | 20.25 |
| 494.6925 | 12.5  | 494.695  | 19.25 |
| 494.7275 | 11.5  | 494.7275 | 17.25 |
| 494.7613 | 10.25 | 494.76   | 16.75 |
| 494.7938 | 9.5   | 494.795  | 21.25 |
| 494.8238 | 10    | 494.83   | 15.25 |
| 494.8563 | 12.25 | 494.8625 | 14.5  |
| 494.8938 | 8.25  | 494.8925 | 15.75 |
| 494.9238 | 11.5  | 494.9263 | 19.75 |
| 494.9563 | 8.75  | 494.96   | 21    |
| 494.9913 | 12.5  | 494.9938 | 19    |
| 495.025  | 10.75 | 495.0263 | 17    |
| 495.0563 | 10.5  | 495.0588 | 16.75 |
| 495.0938 | 12.5  | 495.0988 | 13.75 |

|          |       |          |       |
|----------|-------|----------|-------|
| 495.1263 | 10    | 495.13   | 16    |
| 495.1613 | 9.5   | 495.1613 | 18.75 |
| 495.1925 | 11    | 495.195  | 18.5  |
| 495.2275 | 8.75  | 495.2275 | 18    |
| 495.2575 | 11.5  | 495.26   | 18.25 |
| 495.2938 | 10.75 | 495.295  | 20    |
| 495.3238 | 9.5   | 495.33   | 16.75 |
| 495.3588 | 12.25 | 495.3625 | 18.5  |
| 495.3938 | 9.25  | 495.3925 | 19    |
| 495.4238 | 12.25 | 495.4263 | 18    |
| 495.4588 | 12.75 | 495.46   | 18    |
| 495.4913 | 10.5  | 495.4938 | 23.75 |
| 495.525  | 12.5  | 495.5275 | 19.75 |
| 495.5563 | 10.25 | 495.5588 | 19.5  |
| 495.5938 | 11.5  | 495.5988 | 21.5  |
| 495.6263 | 10.75 | 495.63   | 19    |
| 495.6613 | 10.25 | 495.6613 | 23    |
| 495.6925 | 9.75  | 495.695  | 22    |
| 495.7275 | 8     | 495.7275 | 22    |
| 495.7575 | 6.75  | 495.76   | 16.25 |
| 495.7938 | 8.75  | 495.795  | 24.75 |
| 495.8238 | 8.25  | 495.83   | 25.75 |
| 495.8563 | 8.75  | 495.8625 | 22    |
| 495.8938 | 11.75 | 495.8925 | 18.5  |
| 495.9238 | 6     | 495.9288 | 18.5  |
| 495.9563 | 10.25 | 495.9625 | 17.25 |
| 495.9913 | 11.25 | 495.9938 | 20.75 |
| 496.025  | 13.5  | 496.0275 | 20.75 |
| 496.0563 | 14.25 | 496.0588 | 20    |
| 496.0938 | 11    | 496.0988 | 22    |
| 496.1263 | 11.5  | 496.13   | 27.75 |
| 496.1613 | 10.75 | 496.1613 | 28.25 |
| 496.1925 | 11.5  | 496.195  | 26.5  |
| 496.2275 | 12.75 | 496.2275 | 34    |
| 496.2575 | 10.5  | 496.26   | 22.25 |
| 496.2938 | 10.5  | 496.295  | 21.5  |
| 496.3238 | 10.5  | 496.33   | 22.5  |
| 496.3563 | 11.25 | 496.3625 | 24.75 |
| 496.3938 | 16.25 | 496.3925 | 21.75 |
| 496.4238 | 12.5  | 496.4288 | 23.25 |
| 496.4588 | 12.25 | 496.46   | 22.25 |
| 496.4913 | 12    | 496.4938 | 15.75 |
| 496.525  | 11.25 |          |       |
| 496.5563 | 11.75 | 496.5588 | 45.25 |
| 496.5938 | 13.25 | 496.5988 | 23.75 |
| 496.6263 | 10.75 | 496.63   | 31.75 |
| 496.6613 | 11.75 |          |       |
| 496.6925 | 12    | 496.695  | 23    |
| 496.7275 | 15.25 | 496.7275 | 52    |
| 496.7575 | 11.5  | 496.76   | 34.75 |

|          |       |          |       |
|----------|-------|----------|-------|
| 496.7938 | 12.5  | 496.795  | 34.75 |
| 496.8238 | 12.5  | 496.8275 | 48    |
| 496.8563 | 11.5  | 496.8625 | 17    |
| 496.8938 | 9.75  |          |       |
| 496.9238 | 11    | 496.9288 | 30.75 |
| 496.9563 | 12    | 496.96   | 19.75 |
| 496.9913 | 10.75 | 496.9938 | 19.75 |
| 497.0263 | 12.25 | 497.0275 | 17    |
| 497.0575 | 11    | 497.0613 | 27.75 |
| 497.0938 | 12.75 | 497.0988 | 18.25 |
| 497.1263 | 14    | 497.1313 | 17.25 |
| 497.1613 | 15    | 497.1613 | 16    |
| 497.1925 | 16    | 497.195  | 17.5  |
| 497.2275 | 15.75 | 497.2275 | 17.25 |
| 497.2575 | 12.25 | 497.26   | 22    |
| 497.2938 | 10.75 | 497.295  | 33.25 |
| 497.3238 | 12.75 | 497.3275 | 18.75 |
| 497.3563 | 11.75 | 497.3625 | 31.75 |
| 497.3938 | 14    | 497.3925 | 40.25 |
| 497.4238 | 14    | 497.4288 | 19.5  |
| 497.4563 | 13.5  | 497.46   | 30.25 |
| 497.4913 | 14.75 | 497.4938 | 17.5  |
| 497.5263 | 16.5  | 497.5263 | 23.5  |
| 497.5575 | 15.5  | 497.5613 | 19.5  |
| 497.5913 | 9.5   | 497.5988 | 21    |
| 497.6263 | 11    | 497.63   | 18.5  |
| 497.6613 | 10    | 497.6625 | 28.5  |
| 497.6925 | 11.25 | 497.6963 | 22.5  |
| 497.7275 | 12.25 | 497.7288 | 17.75 |
| 497.7575 | 12.25 | 497.7613 | 33.25 |
| 497.7938 | 12.75 | 497.7988 | 17.75 |
| 497.8238 | 10.75 | 497.8288 | 24.75 |
| 497.8613 | 8.25  | 497.8638 | 24.25 |
| 497.8938 | 13.5  | 497.8938 | 17.5  |
| 497.9238 | 9.5   | 497.9313 | 19.5  |
| 497.9563 | 9     | 497.965  | 22.25 |
| 497.9913 | 10.25 | 497.9963 | 30.75 |
| 498.0263 | 12.25 | 498.03   | 22.25 |
| 498.0563 | 14.5  | 498.0638 | 21.25 |
| 498.0913 | 12.75 | 498.1013 | 23.75 |
| 498.1263 | 14.5  | 498.1325 | 17    |
| 498.1613 | 14.5  | 498.1638 | 23.75 |
| 498.1925 | 9.5   | 498.1963 | 21.75 |
| 498.2275 | 13.75 | 498.2288 | 18.25 |
| 498.2575 | 15.75 | 498.2613 | 16.75 |
| 498.2938 | 14    | 498.2988 | 29    |
| 498.3238 | 9.75  | 498.3288 | 18.25 |
| 498.3588 | 10.75 | 498.3638 | 16.75 |
| 498.3938 | 10.25 | 498.3938 | 18    |
| 498.4238 | 8.25  | 498.4313 | 16.75 |

|          |       |          |       |
|----------|-------|----------|-------|
| 498.4563 | 12    | 498.4625 | 20.25 |
| 498.4913 | 11.5  | 498.4963 | 22.5  |
| 498.5263 | 7.25  | 498.53   | 17.75 |
| 498.5563 | 8     | 498.5638 | 15.5  |
| 498.5913 | 8.5   | 498.6013 | 20.5  |
| 498.6263 | 8.25  | 498.6325 | 15.75 |
| 498.6613 | 9.5   | 498.6638 | 19.75 |
| 498.6925 | 9.5   | 498.6963 | 18    |
| 498.7275 | 10.25 | 498.7288 | 13.25 |
| 498.76   | 11.5  | 498.7613 | 16    |
| 498.7938 | 10.25 | 498.7988 | 20.25 |
| 498.8238 | 10.25 | 498.8288 | 22.5  |
| 498.8588 | 8.25  | 498.8638 | 14.5  |
| 498.8938 | 12.5  | 498.8938 | 19.25 |
| 498.9238 | 11    | 498.9313 | 16.25 |
| 498.9563 | 10    | 498.9625 | 17.25 |
| 498.9913 | 10    | 498.9963 | 18.5  |
| 499.0263 | 8.75  | 499.0288 | 18.5  |
| 499.0563 | 11.25 | 499.0638 | 13.5  |
| 499.0913 | 11    | 499.1    | 18.75 |
| 499.1288 | 11.75 | 499.1325 | 21.5  |
| 499.1613 | 8.25  | 499.1638 | 18.75 |
| 499.1925 | 12    | 499.1963 | 19.75 |
| 499.2275 | 10    | 499.2288 | 22.5  |
| 499.26   | 13.75 | 499.2638 | 21.5  |
| 499.2938 | 12    | 499.2988 | 21    |
| 499.3238 | 11    | 499.3288 | 21.25 |
| 499.3588 | 12.25 | 499.3638 | 23.25 |
| 499.3938 | 12.25 | 499.3938 | 19.75 |
| 499.4238 | 12.25 | 499.4313 | 21.5  |
| 499.4563 | 10.75 | 499.4625 | 24.25 |
| 499.4913 | 11    | 499.4963 | 17.5  |
| 499.5263 | 13.25 | 499.5288 | 16    |
| 499.5563 | 14.75 | 499.5638 | 16.5  |
| 499.5913 | 9.5   | 499.6    | 22    |
| 499.6263 | 9.75  | 499.6325 | 18.25 |
| 499.6613 | 8.25  | 499.6638 | 21    |
| 499.6925 | 7.5   | 499.6988 | 21    |
| 499.7275 | 7.25  | 499.7288 | 35.5  |
| 499.76   | 6     | 499.765  | 16.25 |
| 499.7938 | 8.5   | 499.7988 | 46    |
| 499.8238 | 12    | 499.8288 | 32.25 |
| 499.8588 | 7     | 499.8638 | 45.25 |
| 499.8938 | 11.25 | 499.8938 | 47.75 |
| 499.9238 | 12.25 | 499.9313 | 20.25 |
| 499.9563 | 8     | 499.9625 | 35    |
| 499.9913 | 10.25 | 499.9963 | 27.5  |
| 500.0263 | 11.25 | 500.0288 | 17.5  |
| 500.0563 | 8.75  | 500.0638 | 21.25 |
| 500.0913 | 10.75 | 500.1    | 25.5  |

|          |       |
|----------|-------|
| 500.1263 | 7.5   |
| 500.1613 | 13.75 |
| 500.1925 | 9.5   |
| 500.2275 | 12    |
| 500.26   | 8.75  |
| 500.2938 | 8.25  |
| 500.3238 | 11    |
| 500.3588 | 8.5   |
| 500.3938 | 9     |
| 500.4238 | 7.75  |
| 500.4588 | 8.5   |
| 500.4913 | 11    |
| 500.5263 | 11.75 |
| 500.5563 | 11.25 |
| 500.5913 | 11    |
| 500.6263 | 12    |
| 500.6613 | 9.25  |
| 500.6925 | 8.25  |
| 500.7275 | 8     |
| 500.76   | 8.75  |
| 500.7938 | 10.25 |
| 500.8238 | 10    |
| 500.8588 | 8     |
| 500.8938 | 11.5  |
| 500.9238 | 10.25 |
| 500.9588 | 11.75 |
| 500.9938 | 11.75 |
| 501.0263 | 11.75 |
| 501.0563 | 11.25 |
| 501.0913 | 7.5   |
| 501.1263 | 13.5  |
| 501.1613 | 10.25 |
| 501.1925 | 8.75  |
| 501.2275 | 11.75 |
| 501.26   | 13    |
| 501.2938 | 9.25  |
| 501.3238 | 11.25 |
| 501.3588 | 10.75 |
| 501.3938 | 8.5   |
| 501.4238 | 12.25 |
| 501.4588 | 9     |
| 501.4938 | 11    |
| 501.5263 | 7.5   |
| 501.5563 | 7.5   |
| 501.5913 | 11.5  |
| 501.6263 | 12.75 |
| 501.6613 | 14.25 |
| 501.6925 | 11    |
| 501.7275 | 10.25 |
| 501.76   | 10    |

|          |       |
|----------|-------|
| 500.1325 | 20.5  |
| 500.1638 | 22    |
| 500.1963 | 20.25 |
| 500.2288 | 17.5  |
| 500.2638 | 18.25 |
| 500.2988 | 17.75 |
| 500.3288 | 18.75 |
| 500.3638 | 20.5  |
| 500.3963 | 18.25 |
| 500.4313 | 15.5  |
| 500.4625 | 18    |
| 500.4963 | 19.25 |
| 500.5288 | 25.25 |
| 500.5638 | 16.75 |
| 500.6    | 16.25 |
| 500.6325 | 14.5  |
| 500.6638 | 18    |
| 500.6963 | 16    |
| 500.7288 | 12.5  |
| 500.7638 | 19.25 |
| 500.7988 | 15.5  |
| 500.8288 | 17    |
| 500.8638 | 16    |
| 500.8963 | 15.75 |
| 500.9288 | 19.5  |
| 500.9625 | 13.75 |
| 500.9963 | 21.75 |
| 501.0288 | 16    |
| 501.0638 | 25.75 |
| 501.1    | 17    |
| 501.1325 | 18    |
| 501.1638 | 30.5  |
| 501.1963 | 22.75 |
| 501.2288 | 21.75 |
| 501.2638 | 18.25 |
| 501.2963 | 23.75 |
| 501.3288 | 19.75 |
| 501.3638 | 27.75 |
| 501.3963 | 18.5  |
| 501.4288 | 17    |
| 501.4625 | 16.25 |
| 501.4963 | 19    |
| 501.5288 | 18.5  |
| 501.5638 | 13.5  |
| 501.6013 | 14.75 |
| 501.6325 | 15.5  |
| 501.6638 | 15.25 |
| 501.6963 | 15.75 |
| 501.7313 | 13.75 |
| 501.7638 | 17.25 |

|          |       |
|----------|-------|
| 501.7938 | 10.75 |
| 501.8238 | 8.5   |
| 501.8575 | 11    |
| 501.8938 | 12    |
| 501.9238 | 10.5  |
| 501.9588 | 15    |
| 501.9938 | 11    |
| 502.0263 | 12    |
| 502.0563 | 14    |
| 502.0925 | 13    |
| 502.1263 | 14.5  |
| 502.1613 | 13    |
| 502.1925 | 13.5  |
| 502.2275 | 12.25 |
| 502.26   | 13    |
| 502.2938 | 15.75 |
| 502.325  | 16.5  |
| 502.3588 | 11.25 |
| 502.3963 | 16.25 |
| 502.4263 | 13    |
| 502.4613 | 14    |
| 502.4963 | 12    |
| 502.5288 | 13.25 |
| 502.5588 | 11.25 |
| 502.595  | 12.5  |
| 502.6313 | 12.75 |
| 502.6625 | 10.25 |
| 502.6938 | 9.5   |
| 502.7313 | 12.75 |
| 502.7613 | 11.5  |
| 502.795  | 8.75  |
| 502.825  | 10.5  |
| 502.86   | 11.75 |
| 502.8963 | 11    |
| 502.9263 | 10.75 |
| 502.9625 | 10    |
| 502.9963 | 9     |
| 503.0288 | 9     |
| 503.0588 | 6.5   |
| 503.095  | 8.25  |
| 503.1313 | 9.75  |
| 503.1625 | 8.75  |
| 503.1938 | 12.5  |
| 503.2313 | 9.75  |
| 503.2613 | 10    |
| 503.295  | 7.75  |
| 503.325  | 7.75  |
| 503.3588 | 11    |
| 503.3963 | 8.5   |
| 503.4263 | 9     |

|          |       |
|----------|-------|
| 501.7963 | 14    |
| 501.8288 | 14    |
| 501.8638 | 12.25 |
| 501.8963 | 17.25 |
| 501.9288 | 13    |
| 501.9625 | 21.25 |
| 501.9963 | 12.25 |
| 502.0288 | 18    |
| 502.0638 | 23.25 |
| 502.1    | 20    |
| 502.1325 | 15.5  |
| 502.1638 | 15    |
| 502.1963 | 21    |
| 502.2313 | 14.75 |
| 502.2638 | 15.5  |
| 502.2963 | 14.25 |
| 502.3288 | 13.5  |
| 502.3638 | 13    |
| 502.3963 | 13.5  |
| 502.4288 | 15.25 |
| 502.4625 | 15.25 |
| 502.4963 | 16    |
| 502.5288 | 16.25 |
| 502.5638 | 17.5  |
| 502.6    | 17.75 |
| 502.635  | 16.25 |
| 502.6638 | 17.25 |
| 502.6963 | 18    |
| 502.7313 | 20    |
| 502.7638 | 16.25 |
| 502.7963 | 17.25 |
| 502.8288 | 16    |
| 502.8638 | 27    |
| 502.8963 | 24    |
| 502.9288 | 15.5  |
| 502.9625 | 16    |
| 502.9963 | 20.25 |
| 503.0288 | 14.5  |
| 503.0638 | 13.5  |
| 503.0975 | 14    |
| 503.1338 | 13    |
| 503.1638 | 17.25 |
| 503.1963 | 13.75 |
| 503.2313 | 13    |
| 503.2638 | 13.5  |
| 503.2963 | 16    |
| 503.3288 | 15.5  |
| 503.3638 | 13    |
| 503.3963 | 18    |
| 503.4288 | 17    |

|          |       |
|----------|-------|
| 503.4625 | 9.75  |
| 503.4963 | 7.75  |
| 503.5288 | 11.5  |
| 503.5588 | 10.5  |
| 503.595  | 8.25  |
| 503.6313 | 8.25  |
| 503.6625 | 8.25  |
| 503.6938 | 10.75 |
| 503.7313 | 7     |
| 503.7613 | 9.75  |
| 503.795  | 10.25 |
| 503.825  | 9.5   |
| 503.8588 | 7.25  |
| 503.8963 | 8.5   |
| 503.9263 | 10.5  |
| 503.965  | 9     |
| 503.9963 | 6.75  |
| 504.0288 | 8.25  |
| 504.0588 | 7.5   |
| 504.095  | 7     |
| 504.1313 | 5.25  |
| 504.1625 | 7     |
| 504.1938 | 10    |
| 504.2313 | 9.25  |
| 504.2613 | 7     |
| 504.295  | 10.5  |
| 504.325  | 7.75  |
| 504.3613 | 7     |
| 504.3963 | 6.75  |
| 504.4263 | 6.75  |
| 504.4625 | 7     |
| 504.4963 | 8.5   |
| 504.5288 | 6.75  |
| 504.5588 | 8.25  |
| 504.595  | 7.75  |
| 504.6288 | 8.75  |
| 504.6625 | 9.5   |
| 504.6938 | 9     |
| 504.7313 | 9     |
| 504.7613 | 8     |
| 504.795  | 8.5   |
| 504.825  | 7.75  |
| 504.8613 | 9.75  |
| 504.8963 | 6.5   |
| 504.9263 | 11    |
| 504.9625 | 8.25  |
| 504.9963 | 8.75  |
| 505.0288 | 11.5  |
| 505.0588 | 10.25 |
| 505.095  | 7.75  |

|          |       |
|----------|-------|
| 503.4625 | 16.5  |
| 503.4963 | 15.5  |
| 503.5288 | 15.25 |
| 503.5638 | 19.75 |
| 503.5975 | 16    |
| 503.6338 | 16.25 |
| 503.6663 | 20.75 |
| 503.6988 | 13.75 |
| 503.7325 | 13.75 |
| 503.7663 | 14.5  |
| 503.7988 | 17.75 |
| 503.8313 | 24.75 |
| 503.8663 | 16.75 |
| 503.8988 | 15.75 |
| 503.93   | 13.5  |
| 503.9663 | 13.75 |
| 503.9988 | 14.25 |
| 504.03   | 17.25 |
| 504.065  | 13    |
| 504.0988 | 13.25 |
| 504.135  | 14.5  |
| 504.1663 | 15.25 |
| 504.1988 | 16.25 |
| 504.2325 | 15.25 |
| 504.2663 | 14.75 |
| 504.2988 | 17    |
| 504.3313 | 21.25 |
| 504.3663 | 16.25 |
| 504.3988 | 14.25 |
| 504.43   | 19.5  |
| 504.4663 | 16.25 |
| 504.4988 | 12.5  |
| 504.53   | 17    |
| 504.565  | 20    |
| 504.5988 | 18    |
| 504.635  | 16    |
| 504.6663 | 19.75 |
| 504.6988 | 13.5  |
| 504.7325 | 18.5  |
| 504.7663 | 15.25 |
| 504.7988 | 13    |
| 504.8313 | 15.5  |
| 504.8663 | 18.75 |
| 504.8988 | 15.5  |
| 504.93   | 17.25 |
| 504.9663 | 19.25 |
| 504.9988 | 19.75 |
| 505.03   | 14.5  |
| 505.0625 | 17.75 |
| 505.0988 | 19    |

|          |       |          |       |
|----------|-------|----------|-------|
| 505.1313 | 8.25  | 505.1363 | 20.25 |
| 505.1625 | 8     | 505.1663 | 22    |
| 505.1975 | 7     | 505.2    | 20.25 |
| 505.2313 | 4.5   | 505.2325 | 18    |
| 505.2613 | 8.5   | 505.2663 | 19.75 |
| 505.295  | 9     | 505.2988 | 17.75 |
| 505.325  | 8     | 505.3313 | 18    |
| 505.3613 | 7     | 505.3688 | 17    |
| 505.3963 | 8     | 505.3988 | 17.75 |
| 505.4263 | 7     | 505.43   | 19.5  |
| 505.4625 | 8.5   | 505.4663 | 19.75 |
| 505.4963 | 7.5   | 505.4988 | 18.25 |
| 505.5288 | 6.75  | 505.53   | 16    |
| 505.5588 | 8.5   | 505.5625 | 15.5  |
| 505.595  | 8.5   | 505.5988 | 13.5  |
| 505.6288 | 9.5   | 505.635  | 19.5  |
| 505.6625 | 11.25 | 505.6663 | 12.75 |
| 505.6988 | 8.75  | 505.7    | 13    |
| 505.7313 | 6.5   | 505.7325 | 22    |
| 505.7613 | 9.25  | 505.7663 | 18.75 |
| 505.795  | 7.75  | 505.7988 | 14    |
| 505.825  | 6.75  | 505.8313 | 15    |
| 505.8613 | 8.5   | 505.8688 | 13.75 |
| 505.8963 | 9.5   | 505.8988 | 15.25 |
| 505.9263 | 8     | 505.93   | 15    |
| 505.9625 | 8.75  | 505.9663 | 13    |
| 505.9963 | 10.25 | 505.9988 | 14.75 |
| 506.0275 | 8.5   | 506.03   | 14.75 |
| 506.0588 | 12    | 506.0625 | 12.25 |
| 506.095  | 7     | 506.0988 | 16.5  |
| 506.1288 | 10    | 506.135  | 15.25 |
| 506.1625 | 10.75 | 506.1663 | 14.75 |
| 506.1975 | 12    | 506.2    | 15.5  |
| 506.2313 | 8.5   | 506.2325 | 12.75 |
| 506.2613 | 13.75 | 506.2663 | 12.25 |
| 506.2975 | 11.75 | 506.2988 | 13    |
| 506.325  | 10.25 | 506.3313 | 11.75 |
| 506.3638 | 11.25 | 506.3688 | 14.25 |
| 506.3963 | 11.75 | 506.3988 | 14    |
| 506.4263 | 10.5  | 506.43   | 10.5  |
| 506.465  | 10    | 506.4688 | 12.75 |
| 506.4963 | 12.5  | 506.4988 | 13.75 |
| 506.5275 | 11    | 506.5313 | 24    |
| 506.5588 | 14.25 | 506.5625 | 13    |
| 506.595  | 10.25 | 506.5988 | 16    |
| 506.6288 | 12    | 506.635  | 12.5  |
| 506.6625 | 13    | 506.6663 | 11.75 |
| 506.6975 | 13.5  | 506.7    | 11.75 |
| 506.7313 | 10.75 | 506.7325 | 13    |
| 506.7613 | 11.75 | 506.7663 | 9.5   |



|          |       |          |       |
|----------|-------|----------|-------|
| 506.7975 | 11.25 | 506.7988 | 16.75 |
| 506.825  | 13.5  | 506.8313 | 16.75 |
| 506.8638 | 13    | 506.8688 | 16    |
| 506.8963 | 10.25 | 506.8988 | 16.5  |
| 506.9275 | 11.25 | 506.93   | 13.25 |
| 506.9625 | 10.75 | 506.9663 | 16.25 |
| 506.9963 | 11.5  | 506.9988 | 15.5  |
| 507.0275 | 16    | 507.0313 | 13.75 |
| 507.0588 | 14.75 | 507.0625 | 13    |
| 507.095  | 14    | 507.0988 | 13.75 |
| 507.1288 | 14    | 507.135  | 15.5  |
| 507.1625 | 12.25 | 507.1663 | 11.75 |
| 507.1975 | 11.5  | 507.2    | 13    |
| 507.2313 | 10.75 | 507.2325 | 13.25 |
| 507.2613 | 10.5  | 507.2663 | 12.75 |
| 507.295  | 13.5  | 507.2988 | 11    |
| 507.325  | 11    | 507.33   | 11.5  |
| 507.3638 | 11.5  | 507.3688 | 14.5  |
| 507.3963 | 8.75  | 507.3988 | 6.25  |
| 507.4275 | 9.25  | 507.43   | 12.25 |
| 507.4625 | 10.25 | 507.4663 | 15.5  |
| 507.4963 | 10.5  | 507.4988 | 14.25 |
| 507.5275 | 8.75  | 507.5313 | 12    |
| 507.5588 | 6.75  | 507.5625 | 13.25 |
| 507.595  | 9.25  | 507.6    | 14.75 |
| 507.6288 | 6.75  | 507.6388 | 21.25 |
| 507.6625 | 8.75  | 507.6713 | 14    |
| 507.6988 | 10    | 507.7013 | 16.25 |
| 507.7313 | 7.75  | 507.7338 | 14.5  |
| 507.7613 | 8.5   | 507.7675 | 13    |
| 507.795  | 8.5   | 507.8    | 15.5  |
| 507.825  | 8.5   | 507.8325 | 16    |
| 507.8638 | 11    | 507.8688 | 12.25 |
| 507.895  | 8.5   | 507.9    | 12.75 |
| 507.9275 | 8.25  | 507.935  | 15    |
| 507.9625 | 10.25 | 507.9688 | 15.75 |
| 507.9975 | 8.5   | 508.0013 | 17.5  |
| 508.0275 | 7.5   | 508.0338 | 16.25 |
| 508.0588 | 10    | 508.065  | 13.5  |
| 508.095  | 10.5  | 508.1025 | 16.25 |
| 508.1288 | 9.5   | 508.1388 | 15.75 |
| 508.1625 | 10.25 | 508.1688 | 13    |
| 508.1988 | 10.75 | 508.2013 | 14.5  |
| 508.2313 | 9     | 508.2338 | 13.25 |
| 508.2613 | 13    | 508.2675 | 17.5  |
| 508.295  | 9     | 508.3    | 14.75 |
| 508.3275 | 10.75 | 508.3325 | 11.25 |
| 508.365  | 8.75  | 508.3688 | 17    |
| 508.3963 | 9     | 508.4    | 15    |
| 508.4275 | 8.5   | 508.435  | 12    |

|          |       |
|----------|-------|
| 508.4625 | 13    |
| 508.4963 | 9     |
| 508.5275 | 10.5  |
| 508.5588 | 11.5  |
| 508.595  | 10.25 |
| 508.6288 | 7.5   |
| 508.665  | 11    |
| 508.6988 | 11    |
| 508.7313 | 9.25  |
| 508.7613 | 10    |
| 508.795  | 9.25  |
| 508.8275 | 8.5   |
| 508.8663 | 9     |
| 508.895  | 8.25  |
| 508.93   | 9.5   |
| 508.9625 | 9     |
| 508.9963 | 8.75  |
| 509.0275 | 8.5   |
| 509.0588 | 9.5   |
| 509.095  | 8     |
| 509.1288 | 9.75  |
| 509.165  | 9.25  |
| 509.2    | 7.25  |
| 509.2313 | 9     |
| 509.2613 | 9.5   |
| 509.295  | 12    |
| 509.3275 | 11.75 |
| 509.3638 | 9     |
| 509.395  | 7.5   |
| 509.43   | 8     |
| 509.4625 | 10.25 |
| 509.4963 | 7.5   |
| 509.5275 | 8.5   |
| 509.5588 | 10    |
| 509.5963 | 6.75  |
| 509.6288 | 9.5   |
| 509.665  | 10    |
| 509.6988 | 6     |
| 509.7313 | 9.5   |
| 509.7613 | 10.25 |
| 509.795  | 7.25  |
| 509.8275 | 13.5  |
| 509.8638 | 12.75 |
| 509.895  | 7.75  |
| 509.93   | 9.25  |
| 509.9625 | 9.75  |
| 509.9988 | 12.5  |
| 510.03   | 13.25 |
| 510.0613 | 9.75  |
| 510.1    | 9.5   |

|          |       |
|----------|-------|
| 508.4688 | 13.25 |
| 508.5013 | 16.75 |
| 508.5338 | 12.75 |
| 508.565  | 13    |
| 508.6025 | 14.5  |
| 508.6375 | 12.5  |
| 508.6688 | 14    |
| 508.7013 | 15.5  |
| 508.7338 | 14.75 |
| 508.7675 | 14.25 |
| 508.8    | 20.5  |
| 508.8325 | 15.25 |
| 508.87   | 13.75 |
| 508.9    | 15.75 |
| 508.935  | 12.5  |
| 508.9688 | 15    |
| 509.0013 | 16    |
| 509.0338 | 13.75 |
| 509.065  | 13.75 |
| 509.1    | 14    |
| 509.1375 | 16.5  |
| 509.1688 | 15.75 |
| 509.2013 | 12.25 |
| 509.2338 | 15.25 |
| 509.2675 | 13.75 |
| 509.3    | 14.5  |
| 509.3325 | 11    |
| 509.3688 | 14    |
| 509.4    | 11    |
| 509.435  | 15.25 |
| 509.4688 | 15    |
| 509.5013 | 15    |
| 509.5338 | 12.5  |
| 509.565  | 13.75 |
| 509.6    | 16    |
| 509.6375 | 14    |
| 509.6688 | 15    |
| 509.7013 | 14.5  |
| 509.7338 | 15.75 |
| 509.7675 | 12.75 |
| 509.8    | 16    |
| 509.8325 | 14.5  |
| 509.8688 | 17    |
| 509.9    | 13    |
| 509.935  | 18.5  |
| 509.9688 | 17.75 |
| 510.0013 | 19.25 |
| 510.0338 | 19.75 |
| 510.065  | 14.5  |
| 510.1    | 19.25 |

|          |       |
|----------|-------|
| 510.1313 | 8.25  |
| 510.165  | 11.25 |
| 510.2    | 11.75 |
| 510.2325 | 9.25  |
| 510.2663 | 9.75  |
| 510.2963 | 11.5  |
| 510.33   | 9.75  |
| 510.365  | 8     |
| 510.3975 | 9.75  |
| 510.4325 | 8.25  |
| 510.465  | 9     |
| 510.4988 | 6.75  |
| 510.53   | 8.25  |
| 510.5613 | 12    |
| 510.6    | 8.5   |
| 510.6313 | 10.75 |
| 510.6663 | 9     |
| 510.7    | 10.75 |
| 510.7325 | 8.5   |
| 510.7625 | 8     |
| 510.7963 | 8.5   |
| 510.8313 | 7.75  |
| 510.865  | 10    |
| 510.8975 | 9     |
| 510.9325 | 10.25 |
| 510.965  | 9     |
| 510.9988 | 10.25 |
| 511.03   | 9.75  |
| 511.0613 | 9.25  |
| 511.1    | 10.5  |
| 511.1313 | 8.5   |
| 511.165  | 11.5  |
| 511.2    | 12    |
| 511.2325 | 10.25 |
| 511.2625 | 10    |
| 511.2963 | 13    |
| 511.3313 | 13.5  |
| 511.365  | 13.25 |
| 511.3975 | 10.25 |
| 511.435  | 9.5   |
| 511.465  | 13    |
| 511.4988 | 11.5  |
| 511.53   | 12.25 |
| 511.5613 | 9.75  |
| 511.6    | 13.5  |
| 511.6338 | 11.25 |
| 511.6663 | 12    |
| 511.7    | 11    |
| 511.7325 | 9.25  |
| 511.7625 | 13    |

|          |       |
|----------|-------|
| 510.1375 | 18.75 |
| 510.1688 | 18.5  |
| 510.2013 | 21.5  |
| 510.2338 | 16.5  |
| 510.2675 | 22.5  |
| 510.3    | 18    |
| 510.3325 | 18    |
| 510.3675 | 15    |
| 510.4    | 19.75 |
| 510.435  | 21    |
| 510.4688 | 20.25 |
| 510.5013 | 19.25 |
| 510.5338 | 19.25 |
| 510.565  | 18.25 |
| 510.6    | 23.5  |
| 510.6375 | 16.75 |
| 510.6688 | 14    |
| 510.7013 | 18.25 |
| 510.7338 | 15    |
| 510.7675 | 12.25 |
| 510.8    | 16.75 |
| 510.8325 | 17.25 |
| 510.8675 | 18    |
| 510.9    | 19    |
| 510.935  | 15.5  |
| 510.9688 | 15.5  |
| 511.0013 | 16    |
| 511.0338 | 15    |
| 511.065  | 15.5  |
| 511.1    | 17.75 |
| 511.1388 | 18    |
| 511.1688 | 14.25 |
| 511.2013 | 12.75 |
| 511.2338 | 20.25 |
| 511.2675 | 18.5  |
| 511.3    | 15.25 |
| 511.3325 | 10.75 |
| 511.3675 | 16.5  |
| 511.4    | 16.5  |
| 511.435  | 15.5  |
| 511.4688 | 18.5  |
| 511.5013 | 15.25 |
| 511.5338 | 21.25 |
| 511.5675 | 19    |
| 511.6    | 19.5  |
| 511.6375 | 20.5  |
| 511.6688 | 24    |
| 511.7013 | 16.5  |
| 511.7363 | 17    |
| 511.7675 | 15.75 |

|          |       |          |       |
|----------|-------|----------|-------|
| 511.7975 | 11    | 511.8    | 20.75 |
| 511.8313 | 11.5  | 511.8325 | 20    |
| 511.865  | 10.25 | 511.8675 | 17.5  |
| 511.8975 | 9.75  | 511.9    | 16.5  |
| 511.9325 | 9.75  | 511.935  | 22.75 |
| 511.965  | 10.25 | 511.9688 | 15.25 |
| 511.9988 | 10.5  | 512.0013 | 17.5  |
| 512.035  | 13    | 512.0338 | 18.25 |
| 512.065  | 8.5   | 512.065  | 18    |
| 512.1038 | 8     | 512.0975 | 18    |
| 512.1375 | 8.25  | 512.135  | 17.75 |
| 512.1725 | 6.75  | 512.1688 | 15.25 |
| 512.2038 | 9.75  | 512.2013 | 16.5  |
| 512.2363 | 6.75  | 512.2363 | 18.75 |
| 512.2663 | 5.25  | 512.265  | 15.75 |
| 512.3    | 7.25  | 512.3    | 19.5  |
| 512.3363 | 6.75  | 512.3325 | 13.75 |
| 512.3688 | 8.25  | 512.3675 | 22.5  |
| 512.4013 | 9.5   | 512.4025 | 25    |
| 512.4363 | 10.5  | 512.435  | 20.25 |
| 512.47   | 8     | 512.4688 | 19.75 |
| 512.5025 | 7     | 512.5013 | 21.5  |
| 512.5338 | 9.5   | 512.5338 | 26.75 |
| 512.565  | 7     | 512.565  | 16.5  |
| 512.6038 | 9     | 512.5975 | 17    |
| 512.64   | 8.75  | 512.635  | 14.75 |
| 512.6725 | 8.75  | 512.6688 | 19    |
| 512.7038 | 8     | 512.7013 | 18    |
| 512.7363 | 9.75  | 512.7338 | 15.75 |
| 512.7663 | 8     | 512.765  | 18    |
| 512.8    | 7.25  | 512.8    | 20.5  |
| 512.8363 | 6.75  | 512.8325 | 18    |
| 512.8713 | 8.5   | 512.8675 | 18    |
| 512.9013 | 9.25  | 512.9    | 19.25 |
| 512.9363 | 11.25 | 512.935  | 22.75 |
| 512.97   | 9.5   | 512.9688 | 16.75 |
| 513.0025 | 10.75 | 513.0013 | 17    |
| 513.0338 | 8     | 513.0338 | 17.5  |
| 513.065  | 8.25  | 513.065  | 20.25 |
| 513.1038 | 11.5  | 513.0975 | 16.25 |
| 513.1375 | 9.75  | 513.135  | 19.25 |
| 513.1725 | 9     | 513.1688 | 21.25 |
| 513.2063 | 11.25 | 513.2013 | 18.25 |
| 513.2363 | 9.75  | 513.2338 | 19.5  |
| 513.2663 | 8.5   | 513.2675 | 17.75 |
| 513.3    | 9.5   | 513.3    | 23.75 |
| 513.3388 | 10.5  | 513.3325 | 21.25 |
| 513.3713 | 10    | 513.3675 | 22    |
| 513.4013 | 10.75 | 513.4    | 19.25 |
| 513.4363 | 11.25 | 513.4375 | 21.25 |

|          |       |
|----------|-------|
| 513.47   | 9.5   |
| 513.5025 | 11.75 |
| 513.5338 | 7.75  |
| 513.565  | 8.5   |
| 513.6038 | 10.75 |
| 513.6375 | 9.75  |
| 513.6725 | 8.5   |
| 513.7038 | 8     |
| 513.7363 | 11.25 |
| 513.7663 | 11.25 |
| 513.8038 | 13.5  |
| 513.8388 | 11.75 |
| 513.8713 | 8     |
| 513.9013 | 10.5  |
| 513.9363 | 10.5  |
| 513.97   | 10.75 |
| 514.0025 | 11.75 |
| 514.0338 | 9.5   |
| 514.065  | 12.25 |
| 514.105  | 11.5  |
| 514.1375 | 10.5  |
| 514.1725 | 10.25 |
| 514.2038 | 12.25 |
| 514.2363 | 13    |
| 514.2663 | 15.75 |
| 514.2975 | 12.75 |
| 514.3388 | 11.5  |
| 514.3725 | 11.5  |
| 514.4038 | 11.25 |
| 514.4363 | 8.75  |
| 514.47   | 11.25 |
| 514.5025 | 10.25 |
| 514.5338 | 12.75 |
| 514.565  | 8.5   |
| 514.605  | 10    |
| 514.6375 | 12    |
| 514.6725 | 8.5   |
| 514.7038 | 8     |
| 514.7363 | 8.75  |
| 514.7663 | 9.5   |
| 514.7975 | 7.25  |
| 514.8388 | 8     |
| 514.8713 | 9     |
| 514.9038 | 9.25  |
| 514.9388 | 9.25  |
| 514.97   | 11    |
| 515.0025 | 10.5  |
| 515.0338 | 9.75  |
| 515.065  | 9     |
| 515.105  | 11.75 |

|          |       |
|----------|-------|
| 513.4688 | 18.5  |
| 513.5013 | 16    |
| 513.5338 | 21    |
| 513.565  | 20.25 |
| 513.5975 | 17    |
| 513.6325 | 23.25 |
| 513.6688 | 22.25 |
| 513.7013 | 19.5  |
| 513.7338 | 22    |
| 513.7675 | 20    |
| 513.8    | 18.5  |
| 513.8325 | 19.75 |
| 513.8675 | 22.25 |
| 513.8988 | 24.25 |
| 513.935  | 22.75 |
| 513.9688 | 23    |
| 514.0013 | 22.5  |
| 514.0338 | 25.25 |
| 514.065  | 24    |
| 514.0975 | 24.5  |
| 514.1325 | 19.25 |
| 514.1688 | 25.5  |
| 514.2013 | 27.75 |
| 514.2338 | 21.75 |
| 514.2675 | 22.75 |
| 514.3    | 22    |
| 514.3325 | 21.75 |
| 514.3675 | 20.5  |
| 514.3988 | 19.25 |
| 514.4375 | 21    |
| 514.4688 | 21    |
| 514.5013 | 16.75 |
| 514.5338 | 17.25 |
| 514.565  | 18.25 |
| 514.5975 | 19.75 |
| 514.6325 | 19.25 |
| 514.6688 | 18.5  |
| 514.7013 | 18.5  |
| 514.7338 | 23.5  |
| 514.7675 | 17    |
| 514.8    | 21.25 |
| 514.8325 | 17.25 |
| 514.8675 | 17.5  |
| 514.8988 | 17.75 |
| 514.9375 | 25.25 |
| 514.9688 | 19.5  |
| 515.0013 | 19    |
| 515.0338 | 19.5  |
| 515.065  | 24    |
| 515.0975 | 21.75 |

|          |       |
|----------|-------|
| 515.1375 | 10.25 |
| 515.17   | 9.25  |
| 515.2038 | 9.5   |
| 515.2363 | 8.5   |
| 515.2688 | 5.75  |
| 515.2975 | 11.25 |
| 515.3413 | 11    |
| 515.3713 | 8.25  |
| 515.4038 | 8     |
| 515.4363 | 8.75  |
| 515.47   | 7.25  |
| 515.5025 | 9.5   |
| 515.535  | 11    |
| 515.565  | 10.25 |
| 515.605  | 9.5   |
| 515.6375 | 12.75 |
| 515.67   | 12.5  |
| 515.7038 | 10.25 |
| 515.7363 | 8.5   |
| 515.7663 | 10    |
| 515.7975 | 12.25 |
| 515.8413 | 9.25  |
| 515.8713 | 11    |
| 515.9038 | 10.75 |
| 515.9363 | 7.25  |
| 515.97   | 11.25 |
| 516.0025 | 8     |
| 516.0338 | 9.25  |
| 516.0675 | 9.25  |
| 516.105  | 10.5  |
| 516.1388 | 9.5   |
| 516.17   | 12.75 |
| 516.2038 | 12.25 |
| 516.2363 | 10.5  |
| 516.2663 | 10    |
| 516.2975 | 12.75 |
| 516.3413 | 12    |
| 516.3713 | 9     |
| 516.4038 | 11    |
| 516.4363 | 9.75  |
| 516.47   | 11    |
| 516.5025 | 12.5  |
| 516.5338 | 8.5   |
| 516.5688 | 10.75 |
| 516.605  | 12.5  |
| 516.6388 | 12.25 |
| 516.67   | 15    |
| 516.7025 | 15    |
| 516.7388 | 10    |
| 516.7663 | 14.25 |

|          |       |
|----------|-------|
| 515.1325 | 22    |
| 515.1688 | 23.25 |
| 515.2013 | 22.5  |
| 515.2338 | 23.75 |
| 515.2675 | 21.25 |
| 515.3    | 20.5  |
| 515.3325 | 22    |
| 515.365  | 19.75 |
| 515.4013 | 17.25 |
| 515.4375 | 22    |
| 515.4688 | 23    |
| 515.5013 | 15    |
| 515.5338 | 21.5  |
| 515.565  | 20    |
| 515.5975 | 16.75 |
| 515.6325 | 19.75 |
| 515.6688 | 22    |
| 515.7013 | 21    |
| 515.7338 | 18.5  |
| 515.7675 | 17.75 |
| 515.8    | 23    |
| 515.8325 | 19    |
| 515.865  | 18.25 |
| 515.8988 | 21.25 |
| 515.935  | 18    |
| 515.9688 | 22.75 |
| 516.0013 | 20.5  |
| 516.0338 | 19.25 |
| 516.065  | 16.25 |
| 516.0975 | 20.75 |
| 516.1363 | 23.5  |
| 516.17   | 19.25 |
| 516.205  | 18    |
| 516.24   | 21    |
| 516.2713 | 19.5  |
| 516.3038 | 19.25 |
| 516.3363 | 21.5  |
| 516.3688 | 20.25 |
| 516.4025 | 25.25 |
| 516.44   | 28.75 |
| 516.4738 | 25    |
| 516.5063 | 30.75 |
| 516.5388 | 26    |
| 516.5688 | 22.5  |
| 516.6013 | 24.75 |
| 516.6363 | 23.75 |
| 516.67   | 23.75 |
| 516.7075 | 19.25 |
| 516.74   | 22.75 |
| 516.7713 | 21.25 |

|          |       |          |       |
|----------|-------|----------|-------|
| 516.7975 | 11.75 | 516.8038 | 20.5  |
| 516.8413 | 11.25 | 516.8363 | 21    |
| 516.8713 | 14    | 516.8688 | 28.5  |
| 516.9038 | 12.5  | 516.9025 | 23.5  |
| 516.9363 | 12.25 | 516.94   | 23.25 |
| 516.97   | 7.5   | 516.9738 | 23.25 |
| 517.0025 | 10.75 | 517.0063 | 23.75 |
| 517.0338 | 11.75 | 517.0388 | 22    |
| 517.0688 | 13.5  | 517.0688 | 26.75 |
| 517.105  | 11.75 | 517.1013 | 23.25 |
| 517.1388 | 11.75 | 517.1363 | 26.5  |
| 517.17   | 10    | 517.17   | 22.75 |
| 517.2025 | 13    | 517.205  | 26.25 |
| 517.2363 | 10.75 | 517.24   | 21.75 |
| 517.2663 | 9.25  | 517.2713 | 21.5  |
| 517.2975 | 10    | 517.3038 | 24.75 |
| 517.3425 | 9.5   | 517.3363 | 23.25 |
| 517.3713 | 10.5  | 517.3688 | 20    |
| 517.4038 | 13    | 517.4025 | 17.25 |
| 517.4363 | 10.25 | 517.4375 | 19.25 |
| 517.47   | 14.75 | 517.4738 | 25.25 |
| 517.5025 | 12    | 517.5063 | 27    |
| 517.5338 | 11.5  | 517.5388 | 22.25 |
| 517.5688 | 12.75 | 517.5688 | 23.5  |
| 517.605  | 11.25 | 517.6013 | 30    |
| 517.6388 | 9.75  | 517.6363 | 25.25 |
| 517.67   | 9.25  | 517.67   | 22.5  |
| 517.7025 | 9     | 517.705  | 24    |
| 517.7363 | 11    | 517.74   | 17.5  |
| 517.7663 | 10.25 | 517.7713 | 18.25 |
| 517.8    | 7.75  | 517.8038 | 21.75 |
| 517.8413 | 10    | 517.8363 | 23.75 |
| 517.8713 | 9.75  | 517.8688 | 18.5  |
| 517.9038 | 13.25 | 517.9025 | 16    |
| 517.9388 | 7.5   | 517.9375 | 19    |
| 517.97   | 7.5   | 517.9738 | 17.5  |
| 518.0025 | 13.25 | 518.0063 | 21    |
| 518.0338 | 12    | 518.0388 | 26.5  |
| 518.0688 | 10    | 518.0688 | 15.75 |
| 518.105  | 7.75  | 518.1013 | 16    |
| 518.1388 | 11.25 | 518.1363 | 17.25 |
| 518.17   | 12.75 | 518.17   | 18.5  |
| 518.2025 | 10.5  | 518.205  | 18.25 |
| 518.2363 | 9.25  | 518.24   | 16.25 |
| 518.2663 | 11.25 | 518.2713 | 15.5  |
| 518.3    | 12.25 | 518.3038 | 20.25 |
| 518.3413 | 10.75 | 518.3363 | 15.75 |
| 518.3738 | 11.75 | 518.3688 | 22.25 |
| 518.4038 | 12.5  | 518.4025 | 16    |
| 518.4388 | 9.75  | 518.4375 | 19.25 |

|          |       |
|----------|-------|
| 518.47   | 13.5  |
| 518.5025 | 13.25 |
| 518.5338 | 11.25 |
| 518.5688 | 13    |
| 518.605  | 12    |
| 518.6388 | 11.75 |
| 518.67   | 15    |
| 518.7025 | 12.5  |
| 518.7363 | 11.5  |
| 518.7663 | 11.75 |
| 518.8    | 10.75 |
| 518.8413 | 9.5   |
| 518.8738 | 9.5   |
| 518.9038 | 9.25  |
| 518.935  | 10.5  |
| 518.97   | 9.75  |
| 519.0025 | 10    |
| 519.0363 | 14    |
| 519.0688 | 9.75  |
| 519.105  | 6.75  |
| 519.1388 | 11.75 |
| 519.17   | 10.25 |
| 519.2025 | 11    |
| 519.2363 | 10.25 |
| 519.2688 | 13.5  |
| 519.3    | 12.25 |
| 519.3413 | 12.75 |
| 519.3738 | 9.5   |
| 519.4038 | 13    |
| 519.435  | 10.75 |
| 519.47   | 7.25  |
| 519.5025 | 7.75  |
| 519.535  | 13    |
| 519.57   | 9.5   |
| 519.6063 | 10    |
| 519.6425 | 8     |
| 519.67   | 11.25 |
| 519.7025 | 9.75  |
| 519.7363 | 11.25 |
| 519.7663 | 11.5  |
| 519.8    | 14.25 |
| 519.8413 | 9.25  |
| 519.8738 | 8     |
| 519.9038 | 13    |
| 519.935  | 9     |
| 519.9675 | 9.25  |
| 520.0025 | 9.75  |
| 520.035  | 12    |
| 520.07   | 9.75  |
| 520.1063 | 9.25  |

|          |       |
|----------|-------|
| 518.4738 | 16.75 |
| 518.5063 | 14.25 |
| 518.54   | 19    |
| 518.57   | 17    |
| 518.6025 | 14.25 |
| 518.6375 | 18.5  |
| 518.6725 | 16.25 |
| 518.7088 | 15.25 |
| 518.7413 | 14.5  |
| 518.7738 | 13.75 |
| 518.8063 | 14.5  |
| 518.8388 | 13.5  |
| 518.87   | 10.5  |
| 518.905  | 15.5  |
| 518.9388 | 15.25 |
| 518.9763 | 14.75 |
| 519.0088 | 14.75 |
| 519.04   | 17.25 |
| 519.07   | 15    |
| 519.1025 | 15.5  |
| 519.1375 | 16.25 |
| 519.1725 | 13.5  |
| 519.2088 | 15    |
| 519.2425 | 16    |
| 519.2738 | 17.5  |
| 519.3063 | 12.5  |
| 519.3388 | 13    |
| 519.37   | 16    |
| 519.405  | 13.5  |
| 519.4388 | 14    |
| 519.4763 | 12.25 |
| 519.5088 | 12.75 |
| 519.54   | 14.75 |
| 519.57   | 12.75 |
| 519.6025 | 16    |
| 519.64   | 12    |
| 519.6725 | 14.5  |
| 519.7075 | 14.25 |
| 519.7413 | 16.25 |
| 519.7738 | 15    |
| 519.8063 | 14.75 |
| 519.8388 | 18.75 |
| 519.8725 | 15    |
| 519.9063 | 18    |
| 519.9425 | 16    |
| 519.9788 | 13.5  |
| 520.0113 | 15.75 |
| 520.0425 | 19    |
| 520.0725 | 19.75 |
| 520.105  | 20.25 |



|          |       |          |       |
|----------|-------|----------|-------|
| 520.1388 | 12.25 | 520.1425 | 20.25 |
| 520.17   | 13.25 | 520.175  | 20.25 |
| 520.2025 | 13    | 520.21   | 17    |
| 520.2388 | 14.75 | 520.2425 | 19.25 |
| 520.2688 | 11    | 520.275  | 17.5  |
| 520.3    | 11.75 | 520.3075 | 17    |
| 520.3413 | 11.5  | 520.34   | 20.25 |
| 520.3738 | 12.5  | 520.3738 | 18.25 |
| 520.4038 | 12    | 520.4063 | 14.75 |
| 520.435  | 10.75 | 520.4425 | 18.25 |
| 520.4675 | 11.25 | 520.4788 | 19    |
| 520.5025 | 10.75 | 520.5113 | 21.5  |
| 520.535  | 10.25 | 520.5425 | 19.25 |
| 520.57   | 12    | 520.5725 | 19.75 |
| 520.6063 | 9.75  | 520.605  | 17.75 |
| 520.6388 | 11    | 520.6425 | 21.75 |
| 520.67   | 9.75  | 520.6763 | 16.5  |
| 520.7025 | 11    | 520.71   | 19.25 |
| 520.7363 | 7.25  | 520.7425 | 19.75 |
| 520.7688 | 9.5   | 520.775  | 20    |
| 520.8    | 9.25  | 520.8075 | 14.25 |
| 520.8413 | 12.25 | 520.84   | 18    |
| 520.8738 | 9.5   | 520.8738 | 13.5  |
| 520.9038 | 9.75  | 520.9063 | 13.5  |
| 520.935  | 11.75 | 520.9425 | 15.75 |
| 520.9675 | 12    | 520.9788 | 16.5  |
| 521.0025 | 10.5  | 521.0113 | 17.25 |
| 521.035  | 8     | 521.0425 | 14.5  |
| 521.07   | 9.25  | 521.0725 | 19    |
| 521.1063 | 5.75  | 521.105  | 19.5  |
| 521.1388 | 9.75  | 521.1425 | 16.5  |
| 521.17   | 10.5  | 521.175  | 16.75 |
| 521.2025 | 10.5  | 521.21   | 20    |
| 521.2363 | 9     | 521.2425 | 17.25 |
| 521.2688 | 10.25 | 521.275  | 22    |
| 521.3    | 7.5   | 521.3075 | 18.5  |
| 521.3413 | 10.25 | 521.34   | 17.5  |
| 521.3738 | 10.5  | 521.3738 | 21.5  |
| 521.4038 | 12.25 | 521.4063 | 19    |
| 521.4363 | 10.75 | 521.4425 | 19.5  |
| 521.4675 | 7.75  | 521.4788 | 19.75 |
| 521.5038 | 10.25 | 521.5113 | 19.5  |
| 521.535  | 9.75  | 521.5425 | 15    |
| 521.57   | 11.75 | 521.575  | 17    |
| 521.6063 | 11.5  | 521.605  | 26.5  |
| 521.6388 | 10.25 | 521.6425 | 25.75 |
| 521.67   | 10    | 521.675  | 20.5  |
| 521.7025 | 10    | 521.71   | 18.75 |
| 521.7363 | 9.25  | 521.7425 | 23.5  |
| 521.7688 | 7.75  | 521.775  | 21.25 |

|          |       |
|----------|-------|
| 521.8025 | 12.25 |
| 521.8438 | 9.25  |
| 521.8738 | 8.25  |
| 521.9038 | 7.75  |
| 521.935  | 8.5   |
| 521.9675 | 8.25  |
| 522.0038 | 6     |
| 522.0388 | 6.25  |
| 522.07   | 9.5   |
| 522.1063 | 8.5   |
| 522.1388 | 9     |
| 522.17   | 11.25 |
| 522.2025 | 8.25  |
| 522.235  | 9     |
| 522.2688 | 10.75 |
| 522.3025 | 11.75 |
| 522.3438 | 10    |
| 522.3738 | 14.25 |
| 522.4038 | 11.5  |
| 522.4363 | 9.25  |
| 522.4675 | 10    |
| 522.5038 | 11.5  |
| 522.535  | 9.5   |
| 522.57   | 11.25 |
| 522.6063 | 9.75  |
| 522.6388 | 9     |
| 522.67   | 10    |
| 522.7025 | 10.75 |
| 522.7375 | 12.75 |
| 522.7688 | 13.75 |
| 522.8025 | 10.75 |
| 522.8438 | 9.5   |
| 522.8738 | 7.25  |
| 522.9038 | 11.75 |
| 522.935  | 8.25  |
| 522.9675 | 12.5  |
| 523.0038 | 12.25 |
| 523.035  | 10.75 |
| 523.07   | 12.75 |
| 523.1063 | 10.5  |
| 523.1388 | 14    |
| 523.17   | 14.25 |
| 523.205  | 12.25 |
| 523.2413 | 9.5   |
| 523.2688 | 15.25 |
| 523.3025 | 12.75 |
| 523.3438 | 10.5  |
| 523.3738 | 14.25 |
| 523.4038 | 11.5  |
| 523.435  | 12.75 |

|          |       |
|----------|-------|
| 521.8075 | 18    |
| 521.84   | 18.75 |
| 521.8738 | 17.75 |
| 521.9063 | 20.25 |
| 521.9425 | 20    |
| 521.9788 | 18.75 |
| 522.0113 | 17.75 |
| 522.0425 | 17.75 |
| 522.0725 | 18.75 |
| 522.105  | 23.25 |
| 522.1425 | 20    |
| 522.175  | 20.5  |
| 522.21   | 19.5  |
| 522.2425 | 16.25 |
| 522.275  | 16    |
| 522.3075 | 14.5  |
| 522.34   | 19.75 |
| 522.3725 | 24.5  |
| 522.4063 | 21.25 |
| 522.4425 | 19.25 |
| 522.4763 | 19    |
| 522.5113 | 21.25 |
| 522.545  | 23    |
| 522.5725 | 20.25 |
| 522.6075 | 24.75 |
| 522.6425 | 21.5  |
| 522.675  | 22    |
| 522.7125 | 21.25 |
| 522.7425 | 20    |
| 522.775  | 23.25 |
| 522.8075 | 21.25 |
| 522.84   | 19.5  |
| 522.8725 | 20    |
| 522.9063 | 17.75 |
| 522.9425 | 24    |
| 522.9763 | 22.75 |
| 523.0113 | 20.25 |
| 523.0425 | 24    |
| 523.0725 | 21    |
| 523.105  | 23    |
| 523.145  | 16.25 |
| 523.175  | 20.75 |
| 523.21   | 16.75 |
| 523.2425 | 22.25 |
| 523.275  | 22.25 |
| 523.3075 | 21.5  |
| 523.34   | 16    |
| 523.3738 | 16    |
| 523.4063 | 18.5  |
| 523.4425 | 20    |

|          |       |
|----------|-------|
| 523.4675 | 13.75 |
| 523.5038 | 12.5  |
| 523.535  | 10.75 |
| 523.5725 | 14.25 |
| 523.6063 | 9.25  |
| 523.6388 | 10    |
| 523.67   | 9.5   |
| 523.7025 | 11.25 |
| 523.7375 | 8.5   |
| 523.7688 | 12    |
| 523.8025 | 12.25 |
| 523.8438 | 12    |
| 523.8738 | 13    |
| 523.9038 | 11    |
| 523.935  | 10.75 |
| 523.97   | 6.75  |
| 524.0013 | 7.5   |
| 524.035  | 9     |
| 524.0725 | 9.25  |
| 524.1063 | 11    |
| 524.1388 | 13    |
| 524.17   | 9.5   |
| 524.2    | 8.75  |
| 524.2375 | 9     |
| 524.2688 | 11.75 |
| 524.305  | 10    |
| 524.3475 | 9.75  |
| 524.3738 | 9.25  |
| 524.4038 | 9.25  |
| 524.435  | 8.75  |
| 524.47   | 11.75 |
| 524.5013 | 14.25 |
| 524.535  | 11.75 |
| 524.5725 | 12    |
| 524.6063 | 13.25 |
| 524.6388 | 10.25 |
| 524.67   | 12    |
| 524.7    | 12    |
| 524.7375 | 10    |
| 524.7688 | 15.5  |
| 524.805  | 12.5  |
| 524.8438 | 11.75 |
| 524.8738 | 13    |
| 524.9038 | 8     |
| 524.935  | 13.5  |
| 524.97   | 11.25 |
| 525.0013 | 8.75  |
| 525.035  | 9.25  |
| 525.0725 | 11.5  |
| 525.1063 | 10.5  |

|          |       |
|----------|-------|
| 523.4763 | 21.5  |
| 523.5113 | 17.5  |
| 523.5425 | 22.5  |
| 523.5725 | 18.5  |
| 523.605  | 21.25 |
| 523.6425 | 17.75 |
| 523.675  | 16.75 |
| 523.71   | 17.5  |
| 523.7425 | 21    |
| 523.775  | 17    |
| 523.8075 | 16.5  |
| 523.84   | 21    |
| 523.8738 | 21.75 |
| 523.9063 | 23.25 |
| 523.9438 | 18.75 |
| 523.9763 | 18.25 |
| 524.0113 | 21.5  |
| 524.0425 | 23    |
| 524.0738 | 18.75 |
| 524.105  | 16.75 |
| 524.1425 | 22.75 |
| 524.1763 | 20    |
| 524.21   | 23.5  |
| 524.2425 | 25.75 |
| 524.275  | 21    |
| 524.3075 | 20.5  |
| 524.34   | 21.5  |
| 524.3738 | 19.25 |
| 524.4063 | 18.75 |
| 524.4425 | 23.5  |
| 524.4763 | 22.5  |
| 524.5113 | 20    |
| 524.5425 | 22.75 |
| 524.5725 | 20.75 |
| 524.605  | 21.5  |
| 524.6425 | 21    |
| 524.6788 | 18.75 |
| 524.71   | 20.75 |
| 524.7425 | 18.5  |
| 524.775  | 22    |
| 524.8075 | 22.75 |
| 524.84   | 23.25 |
| 524.8738 | 23.75 |
| 524.9063 | 19.25 |
| 524.9425 | 21    |
| 524.9763 | 18.75 |
| 525.0113 | 22.25 |
| 525.0425 | 17    |
| 525.0725 | 23.75 |
| 525.105  | 16.5  |

|          |       |          |       |
|----------|-------|----------|-------|
| 525.14   | 11    | 525.1425 | 21.25 |
| 525.17   | 10.75 | 525.1788 | 21.5  |
| 525.2013 | 9.25  | 525.2088 | 19.75 |
| 525.2375 | 10.25 | 525.2425 | 20.25 |
| 525.2688 | 10.75 | 525.275  | 23    |
| 525.305  | 11.5  | 525.3075 | 24    |
| 525.3438 | 12.25 | 525.34   | 24    |
| 525.3738 | 15    | 525.3763 | 24    |
| 525.4038 | 9.75  | 525.4063 | 21.25 |
| 525.435  | 11.25 | 525.4425 | 19.5  |
| 525.47   | 13.75 | 525.4763 | 22.75 |
| 525.5013 | 13    | 525.5113 | 25.5  |
| 525.5363 | 15    | 525.5425 | 23.5  |
| 525.57   | 14.5  | 525.5725 | 23    |
| 525.6063 | 10    | 525.605  | 20.25 |
| 525.6388 | 12.5  | 525.6413 | 23.5  |
| 525.67   | 11    | 525.6788 | 20.5  |
| 525.7013 | 13.25 | 525.7088 | 19.75 |
| 525.7375 | 13    | 525.7413 | 24.5  |
| 525.7688 | 10.5  | 525.775  | 26.5  |
| 525.8063 | 17    | 525.8075 | 25    |
| 525.8438 | 14.25 | 525.84   | 21.75 |
| 525.8738 | 16    | 525.8763 | 20.75 |
| 525.905  | 19    | 525.9088 | 23.25 |
| 525.9363 | 9.5   | 525.945  | 20.25 |
| 525.9725 | 12.5  | 525.9788 | 28.25 |
| 526.0038 | 13.5  | 526.0125 | 25.5  |
| 526.04   | 10.75 | 526.0438 | 26.75 |
| 526.0725 | 12    | 526.0738 | 24    |
| 526.1088 | 14    | 526.1088 | 23.5  |
| 526.1413 | 11.25 | 526.1413 | 21    |
| 526.1725 | 12.25 | 526.18   | 19    |
| 526.2038 | 11.75 | 526.21   | 15    |
| 526.2388 | 12    | 526.2438 | 23.25 |
| 526.2688 | 12.75 | 526.2775 | 20.75 |
| 526.3088 | 11.25 | 526.31   | 21    |
| 526.3425 | 12    | 526.3425 | 22.75 |
| 526.375  | 11.75 | 526.3763 | 20.5  |
| 526.405  | 9.75  | 526.4088 | 20.5  |
| 526.4363 | 14.5  | 526.445  | 20.25 |
| 526.4725 | 15.25 | 526.4788 | 18.25 |
| 526.5038 | 13.25 | 526.5125 | 21.75 |
| 526.54   | 12.75 | 526.5438 | 19.5  |
| 526.5725 | 12.25 | 526.5738 | 20.25 |
| 526.6113 | 9.25  | 526.6088 | 22.25 |
| 526.6413 | 9.75  | 526.6413 | 13.75 |
| 526.6725 | 10    | 526.68   | 22.5  |
| 526.7038 | 13.75 | 526.71   | 18.25 |
| 526.74   | 11.75 | 526.7438 | 18.25 |
| 526.7688 | 11.75 | 526.7775 | 19.25 |

|          |       |          |       |
|----------|-------|----------|-------|
| 526.8088 | 10.25 | 526.81   | 19.75 |
| 526.8425 | 14    | 526.8425 | 16.25 |
| 526.875  | 12.25 | 526.8763 | 15.75 |
| 526.905  | 11.75 | 526.9088 | 15.75 |
| 526.9388 | 13.75 | 526.945  | 17.5  |
| 526.9725 | 11.5  | 526.9788 | 21.5  |
| 527.0038 | 10.5  | 527.0125 | 21    |
| 527.04   | 9.75  | 527.0438 | 18.75 |
| 527.0725 | 11.25 | 527.0738 | 14.5  |
| 527.1088 | 12.75 | 527.1088 | 16.25 |
| 527.1413 | 14.75 | 527.1413 | 16.75 |
| 527.1725 | 12.25 | 527.18   | 19.75 |
| 527.2063 | 15.25 | 527.21   | 16.75 |
| 527.2388 | 12.5  | 527.2438 | 25    |
| 527.2688 | 10.75 | 527.2775 | 20    |
| 527.3088 | 15.25 | 527.31   | 20.75 |
| 527.3438 | 13.5  | 527.3425 | 20    |
| 527.375  | 10    | 527.3763 | 21.25 |
| 527.405  | 10.25 | 527.41   | 16.75 |
| 527.4388 | 8.75  | 527.445  | 19.25 |
| 527.4725 | 11.5  | 527.4788 | 22.5  |
| 527.5038 | 10.75 | 527.5125 | 19.5  |
| 527.54   | 11.5  | 527.5438 | 17    |
| 527.5725 | 12.75 | 527.5738 | 14.75 |
| 527.6088 | 12.75 | 527.6088 | 16.5  |
| 527.6413 | 13.5  | 527.6413 | 17.25 |
| 527.6725 | 12.25 | 527.68   | 18.5  |
| 527.7038 | 10.5  | 527.71   | 19.75 |
| 527.7388 | 14    | 527.7438 | 22.5  |
| 527.7713 | 8.5   | 527.7775 | 20.5  |
| 527.8088 | 11    | 527.81   | 19.5  |
| 527.8425 | 12.75 | 527.845  | 17.75 |
| 527.8775 | 10    | 527.8775 | 17.75 |
| 527.905  | 8.75  | 527.9125 | 24.5  |
| 527.9388 | 9     | 527.945  | 20.75 |
| 527.9725 | 7     | 527.9788 | 23.5  |
| 528.0038 | 10.25 | 528.0125 | 21.25 |
| 528.0375 | 10    | 528.0425 | 21    |
| 528.0725 | 11.75 | 528.0738 | 22.25 |
| 528.1088 | 10.5  | 528.1088 | 19.75 |
| 528.1413 | 9.75  | 528.1413 | 18.75 |
| 528.1738 | 9.25  | 528.18   | 18.75 |
| 528.2038 | 12    | 528.21   | 20.25 |
| 528.2388 | 12.75 | 528.2438 | 20.75 |
| 528.2738 | 12.5  | 528.2775 | 19.25 |
| 528.3088 | 11.25 | 528.3113 | 21.5  |
| 528.3425 | 13    | 528.345  | 22.5  |
| 528.375  | 12    | 528.3775 | 20.75 |
| 528.4088 | 10    | 528.4125 | 18.25 |
| 528.4388 | 9     | 528.445  | 15.75 |

|          |       |
|----------|-------|
| 528.4725 | 12.75 |
| 528.5038 | 13.75 |
| 528.5375 | 10    |
| 528.5725 | 10.75 |
| 528.6088 | 10    |
| 528.6413 | 13    |
| 528.6763 | 9.25  |
| 528.7038 | 10.25 |
| 528.7388 | 10.75 |
| 528.7738 | 12.75 |
| 528.8088 | 14.75 |
| 528.8425 | 11.75 |
| 528.875  | 11.5  |
| 528.905  | 10    |
| 528.9388 | 10.25 |
| 528.9725 | 8.5   |
| 529.0075 | 10.25 |
| 529.0388 | 10    |
| 529.0725 | 9.5   |
| 529.1088 | 9.5   |
| 529.1413 | 10.5  |
| 529.1738 | 9     |
| 529.2038 | 9.5   |
| 529.2388 | 10    |
| 529.2738 | 10.5  |
| 529.3088 | 9.25  |
| 529.3425 | 7.25  |
| 529.375  | 9.75  |
| 529.4075 | 9.5   |
| 529.4388 | 9     |
| 529.4725 | 9.75  |
| 529.5038 | 9     |
| 529.5388 | 9.75  |
| 529.5725 | 10    |
| 529.6125 | 11.5  |
| 529.6413 | 11    |
| 529.6738 | 10.25 |
| 529.7038 | 8.5   |
| 529.7388 | 8.5   |
| 529.7738 | 10.25 |
| 529.8063 | 10.25 |
| 529.8413 | 8.25  |
| 529.875  | 8.5   |
| 529.9075 | 7.75  |
| 529.9388 | 11    |
| 529.9725 | 8     |
| 530.005  | 10.5  |
| 530.0388 | 10.5  |
| 530.0725 | 12    |
| 530.1125 | 11.25 |

|          |       |
|----------|-------|
| 528.4788 | 19.25 |
| 528.5125 | 18.5  |
| 528.5425 | 18.75 |
| 528.5738 | 21.75 |
| 528.6088 | 20.75 |
| 528.6413 | 23.5  |
| 528.68   | 19    |
| 528.71   | 16.75 |
| 528.7438 | 19.25 |
| 528.7775 | 16.5  |
| 528.81   | 17.75 |
| 528.845  | 20.25 |
| 528.8775 | 20.75 |
| 528.9125 | 21.75 |
| 528.945  | 16.25 |
| 528.9788 | 20.25 |
| 529.0138 | 16.25 |
| 529.0425 | 17.75 |
| 529.0738 | 21    |
| 529.1113 | 17    |
| 529.1413 | 21    |
| 529.18   | 20.25 |
| 529.21   | 18.25 |
| 529.2438 | 20.75 |
| 529.2775 | 20    |
| 529.31   | 20    |
| 529.345  | 16.25 |
| 529.3775 | 15.5  |
| 529.4125 | 21.25 |
| 529.445  | 15.75 |
| 529.4788 | 11.75 |
| 529.5125 | 16.5  |
| 529.5425 | 14.75 |
| 529.5738 | 20    |
| 529.6088 | 14.75 |
| 529.6438 | 15.75 |
| 529.68   | 20    |
| 529.71   | 20    |
| 529.7438 | 19.75 |
| 529.7775 | 18    |
| 529.81   | 19.5  |
| 529.845  | 16.75 |
| 529.8775 | 16.5  |
| 529.9125 | 21.75 |
| 529.945  | 21.25 |
| 529.9763 | 18.5  |
| 530.0125 | 16.5  |
| 530.0425 | 21.75 |
| 530.0738 | 18.25 |
| 530.1113 | 16.75 |

|          |       |
|----------|-------|
| 530.1413 | 11.75 |
| 530.1738 | 14    |
| 530.2038 | 9.25  |
| 530.2388 | 12.25 |
| 530.2738 | 12.25 |
| 530.3063 | 12.25 |
| 530.3413 | 11    |
| 530.375  | 11.25 |
| 530.4075 | 9.5   |
| 530.4388 | 14    |
| 530.47   | 12    |
| 530.5063 | 12    |
| 530.5388 | 13    |
| 530.5725 | 11.75 |
| 530.6088 | 14.25 |
| 530.6413 | 15.5  |
| 530.6738 | 12.25 |
| 530.7063 | 11.75 |
| 530.7388 | 11.75 |
| 530.7738 | 13.75 |
| 530.8063 | 14.25 |
| 530.8413 | 13    |
| 530.875  | 8.5   |
| 530.9075 | 12.25 |
| 530.9388 | 11.25 |
| 530.97   | 11.5  |
| 531.0063 | 12.5  |
| 531.0388 | 14.25 |
| 531.0725 | 13.25 |
| 531.1088 | 14    |
| 531.1425 | 16.5  |
| 531.1738 | 12.25 |
| 531.2038 | 14    |
| 531.2388 | 10.75 |
| 531.2738 | 13    |
| 531.3063 | 13.25 |
| 531.3413 | 13    |
| 531.375  | 10.75 |
| 531.4075 | 14    |
| 531.4388 | 14    |
| 531.47   | 18    |
| 531.5063 | 11.75 |
| 531.5388 | 16.25 |
| 531.5725 | 16    |
| 531.6088 | 13.75 |
| 531.6425 | 12.75 |
| 531.6738 | 13.25 |
| 531.7038 | 12.5  |
| 531.7388 | 13.5  |
| 531.7738 | 13.25 |

|          |       |
|----------|-------|
| 530.1438 | 19.5  |
| 530.18   | 13    |
| 530.21   | 18.75 |
| 530.2438 | 16.75 |
| 530.2775 | 19    |
| 530.31   | 23.75 |
| 530.345  | 19.75 |
| 530.3775 | 21    |
| 530.4125 | 19.5  |
| 530.445  | 18.5  |
| 530.4763 | 19.25 |
| 530.5125 | 19.25 |
| 530.5425 | 22.5  |
| 530.5738 | 23.25 |
| 530.6088 | 18    |
| 530.6438 | 22    |
| 530.68   | 20.5  |
| 530.71   | 21.5  |
| 530.7438 | 20.25 |
| 530.7775 | 20    |
| 530.81   | 20.25 |
| 530.845  | 21.25 |
| 530.8775 | 25    |
| 530.9125 | 24    |
| 530.945  | 25.75 |
| 530.9763 | 24.25 |
| 531.0125 | 29.25 |
| 531.0425 | 23.75 |
| 531.0738 | 25.25 |
| 531.1088 | 20.75 |
| 531.1463 | 29    |
| 531.18   | 22.75 |
| 531.21   | 21.75 |
| 531.2438 | 21.25 |
| 531.2775 | 23.5  |
| 531.31   | 19.75 |
| 531.345  | 23.5  |
| 531.3775 | 18.75 |
| 531.4113 | 21    |
| 531.445  | 19.75 |
| 531.4763 | 20.25 |
| 531.5125 | 25.75 |
| 531.5425 | 18.25 |
| 531.5738 | 19    |
| 531.6088 | 23.25 |
| 531.6463 | 26.25 |
| 531.68   | 19.5  |
| 531.71   | 22    |
| 531.7438 | 20.75 |
| 531.7775 | 17    |

|          |       |          |       |
|----------|-------|----------|-------|
| 531.8063 | 12.25 | 531.81   | 23.25 |
| 531.8413 | 10    | 531.845  | 27.5  |
| 531.875  | 9     | 531.8775 | 29.5  |
| 531.9075 | 12    | 531.9113 | 24    |
| 531.9388 | 7.25  | 531.945  | 20    |
| 531.97   | 12.25 | 531.9763 | 29    |
| 532.0063 | 7.75  | 532.0125 | 27.75 |
| 532.0388 | 10.25 | 532.0425 | 25.25 |
| 532.0738 | 16.5  | 532.0738 | 26    |
| 532.1113 | 9     | 532.1088 | 27    |
| 532.145  | 12.75 | 532.1463 | 25.25 |
| 532.1763 | 12.5  | 532.18   | 26.75 |
| 532.2063 | 9.75  | 532.21   | 23.25 |
| 532.2425 | 10    | 532.2438 | 24.75 |
| 532.2763 | 11.25 | 532.2775 | 22    |
| 532.3075 | 9.25  | 532.31   | 16.75 |
| 532.345  | 8.5   | 532.345  | 26.75 |
| 532.3788 | 13.25 | 532.3788 | 24    |
| 532.4088 | 9.5   | 532.4113 | 25.5  |
| 532.44   | 12.25 | 532.4475 | 21.75 |
| 532.4725 | 14.25 | 532.4813 | 23.25 |
| 532.5088 | 11.25 | 532.515  | 26.25 |
| 532.5413 | 12.75 | 532.545  | 22.25 |
| 532.5738 | 11.75 | 532.5763 | 24.5  |
| 532.6088 | 14.5  | 532.61   | 27.25 |
| 532.645  | 10.25 | 532.6475 | 26.75 |
| 532.6763 | 11.5  | 532.6813 | 24.75 |
| 532.7063 | 13.75 | 532.7113 | 23.25 |
| 532.7425 | 11.75 | 532.745  | 25    |
| 532.775  | 10.75 | 532.7788 | 24.25 |
| 532.8075 | 12.75 | 532.8088 | 21.5  |
| 532.845  | 14    | 532.8475 | 22.75 |
| 532.8788 | 11    | 532.8813 | 20.5  |
| 532.9088 | 11.25 | 532.9138 | 19    |
| 532.94   | 13.25 | 532.9475 | 21.25 |
| 532.9725 | 12    | 532.9813 | 22    |
| 533.0088 | 12.5  | 533.015  | 22.5  |
| 533.0413 | 16.25 | 533.045  | 26.25 |
| 533.0738 | 11.5  | 533.0763 | 23.75 |
| 533.1088 | 8.5   | 533.11   | 25.5  |
| 533.145  | 11.75 | 533.1475 | 23.75 |
| 533.1763 | 12    | 533.1813 | 19.5  |
| 533.2063 | 16.25 | 533.2113 | 23.5  |
| 533.245  | 12.75 | 533.245  | 19.75 |
| 533.275  | 12.25 | 533.2788 | 23.5  |
| 533.3075 | 12    | 533.3088 | 19.25 |
| 533.3425 | 14.5  | 533.3475 | 19    |
| 533.3788 | 12.5  | 533.3813 | 19.5  |
| 533.4088 | 11.25 | 533.4138 | 19.25 |
| 533.44   | 10.25 | 533.4475 | 20.75 |



|          |       |
|----------|-------|
| 533.4725 | 13    |
| 533.5088 | 11    |
| 533.5413 | 11    |
| 533.5738 | 10    |
| 533.6088 | 10    |
| 533.645  | 13.75 |
| 533.6763 | 9.75  |
| 533.7088 | 9.5   |
| 533.7463 | 15.5  |
| 533.7763 | 10.5  |
| 533.81   | 13.75 |
| 533.845  | 10.5  |
| 533.8813 | 10    |
| 533.9113 | 8.5   |
| 533.9425 | 15.25 |
| 533.9763 | 15    |
| 534.0113 | 12.75 |
| 534.0438 | 12.25 |
| 534.075  | 12.5  |
| 534.11   | 7.75  |
| 534.1463 | 9.5   |
| 534.1775 | 12    |
| 534.2088 | 9.25  |
| 534.2463 | 6.75  |
| 534.2763 | 8     |
| 534.31   | 9.75  |
| 534.345  | 9.25  |
| 534.3838 | 8.75  |
| 534.4113 | 10.5  |
| 534.4425 | 12.5  |
| 534.4788 | 13.25 |
| 534.5113 | 14.5  |
| 534.5438 | 15    |
| 534.575  | 12.75 |
| 534.6125 | 11.75 |
| 534.6463 | 12.5  |
| 534.6775 | 10.75 |
| 534.7088 | 12    |
| 534.7463 | 12.75 |
| 534.7763 | 12.75 |
| 534.81   | 12.25 |
| 534.845  | 9.25  |
| 534.8813 | 13.5  |
| 534.9113 | 11.5  |
| 534.9425 | 14.5  |
| 534.9788 | 12.75 |
| 535.0113 | 9     |
| 535.0438 | 11    |
| 535.075  | 10    |
| 535.1113 | 11.25 |

|          |       |
|----------|-------|
| 533.4788 | 21.75 |
| 533.515  | 25.25 |
| 533.5475 | 22.25 |
| 533.5763 | 19.25 |
| 533.61   | 23.5  |
| 533.6475 | 21    |
| 533.6813 | 19.75 |
| 533.7113 | 21.75 |
| 533.745  | 17.25 |
| 533.7788 | 21.5  |
| 533.8088 | 19    |
| 533.8475 | 23.5  |
| 533.8813 | 19.5  |
| 533.9138 | 23.25 |
| 533.9475 | 21.75 |
| 533.9788 | 23.75 |
| 534.015  | 22.25 |
| 534.045  | 23.75 |
| 534.0763 | 23.25 |
| 534.1125 | 22.25 |
| 534.1475 | 20    |
| 534.1825 | 23.5  |
| 534.2113 | 19.75 |
| 534.2463 | 20.75 |
| 534.2788 | 20    |
| 534.3088 | 22.75 |
| 534.3475 | 23.5  |
| 534.3813 | 20.75 |
| 534.4138 | 18.25 |
| 534.4475 | 18    |
| 534.4788 | 19.25 |
| 534.515  | 19.75 |
| 534.545  | 18.25 |
| 534.5763 | 19.75 |
| 534.615  | 23.5  |
| 534.6475 | 18    |
| 534.6813 | 26    |
| 534.7113 | 20    |
| 534.7463 | 19.25 |
| 534.7788 | 15.75 |
| 534.8088 | 20.25 |
| 534.8475 | 17.5  |
| 534.8813 | 14.75 |
| 534.9138 | 17.5  |
| 534.9475 | 17    |
| 534.9788 | 17.75 |
| 535.015  | 12    |
| 535.045  | 19.25 |
| 535.0763 | 17    |
| 535.115  | 16.75 |

|          |       |          |       |
|----------|-------|----------|-------|
| 535.1463 | 11    | 535.1475 | 21.25 |
| 535.1775 | 9.75  | 535.1788 | 22.25 |
| 535.2088 | 8.75  | 535.2113 | 14.75 |
| 535.2463 | 8.75  | 535.2463 | 20.5  |
| 535.2763 | 13    | 535.2788 | 23    |
| 535.31   | 9.25  | 535.3088 | 20.25 |
| 535.345  | 7.25  | 535.3488 | 17.5  |
| 535.3813 | 10    | 535.3825 | 23.25 |
| 535.4113 | 9.5   | 535.4138 | 18.25 |
| 535.4425 | 12.75 | 535.4475 | 19.5  |
| 535.4788 | 9.75  | 535.4788 | 23.5  |
| 535.5113 | 8.75  | 535.515  | 18    |
| 535.5438 | 10    | 535.545  | 15    |
| 535.575  | 9.5   | 535.575  | 19    |
| 535.6113 | 7.75  | 535.615  | 17.75 |
| 535.6463 | 10.25 | 535.6475 | 19.5  |
| 535.6775 | 10.25 | 535.6788 | 19.5  |
| 535.71   | 9.75  | 535.7113 | 16.5  |
| 535.7463 | 10    | 535.7463 | 18    |
| 535.7763 | 10.75 | 535.7788 | 17.5  |
| 535.81   | 8.5   | 535.8088 | 14.75 |
| 535.845  | 11    | 535.845  | 22.25 |
| 535.8813 | 7.5   | 535.8825 | 15.75 |
| 535.9113 | 10.5  | 535.9138 | 18.25 |
| 535.9425 | 11    | 535.9488 | 19    |
| 535.9788 | 10.75 | 535.9788 | 18.5  |
| 536.0113 | 9     | 536.015  | 20.25 |
| 536.0438 | 11.75 | 536.045  | 18.25 |
| 536.075  | 8.5   | 536.075  | 16.75 |
| 536.1113 | 9.75  | 536.115  | 15.25 |
| 536.1463 | 7.25  | 536.1475 | 19    |
| 536.1775 | 9.75  | 536.1788 | 18.75 |
| 536.21   | 10.5  | 536.2113 | 18    |
| 536.2463 | 8     | 536.2463 | 19.5  |
| 536.2763 | 9.5   | 536.2788 | 16.25 |
| 536.31   | 9.75  | 536.3088 | 17.5  |
| 536.3475 | 11.75 | 536.3463 | 15    |
| 536.3813 | 10.5  | 536.3825 | 16.75 |
| 536.4113 | 8     | 536.4138 | 16    |
| 536.4425 | 7.75  | 536.4475 | 14.75 |
| 536.4788 | 7.5   | 536.4788 | 16.5  |
| 536.5113 | 7     | 536.515  | 17    |
| 536.5438 | 8.5   | 536.545  | 19.5  |
| 536.575  | 9.25  | 536.575  | 17.25 |
| 536.6113 | 6.75  | 536.615  | 20.5  |
| 536.6463 | 8.5   | 536.6475 | 23.5  |
| 536.6775 | 12.5  | 536.6788 | 28    |
| 536.71   | 9     | 536.7113 | 36.75 |
| 536.7463 | 8.25  | 536.745  | 23.5  |
| 536.7763 | 9.75  | 536.7813 | 18.5  |

|          |       |          |       |
|----------|-------|----------|-------|
| 536.81   | 11.5  | 536.8113 | 23.5  |
| 536.8463 | 6.5   | 536.8488 | 23.5  |
| 536.8775 | 9.75  | 536.885  | 31    |
| 536.9113 | 7.25  | 536.9163 | 35    |
| 536.9425 | 6.5   | 536.9488 | 20.5  |
| 536.9788 | 6.5   | 536.9825 | 23.75 |
| 537.0113 | 9.25  | 537.0163 | 21.75 |
| 537.0425 | 10.75 | 537.0463 | 22.25 |
| 537.0775 | 11.25 | 537.0788 | 22.25 |
| 537.1138 | 6     | 537.1163 | 23    |
| 537.1488 | 7.5   | 537.1488 | 20    |
| 537.18   | 10.25 | 537.1813 | 20.25 |
| 537.2125 | 9.25  | 537.2138 | 25.5  |
| 537.2488 | 11.5  | 537.2475 | 20.5  |
| 537.2788 | 8.5   | 537.2813 | 19.25 |
| 537.3125 | 12    | 537.3113 | 16.25 |
| 537.3475 | 6.75  | 537.3488 | 18.5  |
| 537.3788 | 12    | 537.385  | 17.5  |
| 537.4125 | 8.75  | 537.4163 | 21.75 |
| 537.4438 | 10.25 | 537.4488 | 17.75 |
| 537.4825 | 10.25 | 537.4825 | 21.5  |
| 537.5125 | 7.5   | 537.5163 | 15.75 |
| 537.5438 | 13.25 | 537.5463 | 18.25 |
| 537.5788 | 13.75 | 537.5788 | 20.25 |
| 537.6138 | 9     | 537.6163 | 19.25 |
| 537.6488 | 14.75 | 537.6488 | 15.25 |
| 537.68   | 11.25 | 537.6813 | 19.75 |
| 537.7138 | 11.5  | 537.7138 | 17.5  |
| 537.7488 | 9.75  | 537.7475 | 15.25 |
| 537.7788 | 12.5  | 537.7813 | 13    |
| 537.8125 | 9.25  | 537.8113 | 17.5  |
| 537.8475 | 13    | 537.8488 | 17.5  |
| 537.8788 | 10.75 | 537.885  | 22.75 |
| 537.9125 | 13.75 | 537.9188 | 20    |
| 537.9438 | 11.75 | 537.9488 | 20.25 |
| 537.9825 | 10.25 | 537.9825 | 17.5  |
| 538.0125 | 12.25 | 538.0163 | 14.25 |
| 538.0438 | 12    | 538.0463 | 19.25 |
| 538.08   | 9.75  | 538.0788 | 20    |
| 538.1138 | 11.5  | 538.115  | 16.75 |
| 538.1488 | 14.25 | 538.1488 | 17.5  |
| 538.18   | 10.75 | 538.1813 | 19    |
| 538.2138 | 8.75  | 538.2138 | 18.75 |
| 538.2488 | 10.5  | 538.2475 | 18.5  |
| 538.2788 | 12.5  | 538.2813 | 17.25 |
| 538.3125 | 14.75 | 538.3113 | 22.25 |
| 538.3475 | 10.5  | 538.3463 | 19.75 |
| 538.3788 | 13    | 538.385  | 17.5  |
| 538.4125 | 13.5  | 538.4163 | 18.25 |
| 538.4438 | 10.75 | 538.4463 | 17    |

|          |       |
|----------|-------|
| 538.4825 | 11.5  |
| 538.5125 | 9.75  |
| 538.5438 | 12.25 |
| 538.58   | 10    |
| 538.6138 | 12.5  |
| 538.6475 | 10.75 |
| 538.68   | 10.5  |
| 538.7138 | 12.75 |
| 538.7488 | 10.5  |
| 538.7788 | 10.25 |
| 538.8125 | 12.5  |
| 538.8475 | 9.5   |
| 538.8788 | 9.25  |
| 538.9125 | 13.5  |
| 538.9463 | 9     |
| 538.9825 | 11.5  |
| 539.0125 | 11.5  |
| 539.0438 | 8     |
| 539.0813 | 11.5  |
| 539.1138 | 11    |
| 539.1475 | 13.5  |
| 539.18   | 14    |
| 539.2138 | 11.25 |
| 539.2488 | 10    |
| 539.2788 | 9.5   |
| 539.3125 | 12.5  |
| 539.3475 | 9.25  |
| 539.3788 | 10.75 |
| 539.4125 | 11.75 |
| 539.4463 | 12.75 |
| 539.4825 | 11.5  |
| 539.5125 | 12    |
| 539.5438 | 11    |
| 539.58   | 11    |
| 539.6138 | 11.5  |
| 539.6475 | 15    |
| 539.6838 | 8.75  |
| 539.7138 | 11.5  |
| 539.7488 | 15.75 |
| 539.7788 | 12.75 |
| 539.8138 | 10.5  |
| 539.8475 | 14    |
| 539.8788 | 11.75 |
| 539.91   | 10.75 |
| 539.9463 | 13.75 |
| 539.9825 | 15    |
| 540.0125 | 13.25 |
| 540.0438 | 13.5  |
| 540.08   | 11    |
| 540.1138 | 14.75 |

|          |       |
|----------|-------|
| 538.4825 | 16    |
| 538.5163 | 18.5  |
| 538.5463 | 18.5  |
| 538.5788 | 17.25 |
| 538.615  | 14.75 |
| 538.6488 | 14.75 |
| 538.6813 | 23.75 |
| 538.7138 | 19.75 |
| 538.7475 | 17    |
| 538.7813 | 19.5  |
| 538.8138 | 17.5  |
| 538.8463 | 25.75 |
| 538.885  | 18    |
| 538.9163 | 19.75 |
| 538.9463 | 15    |
| 538.9825 | 15.5  |
| 539.0163 | 17.5  |
| 539.0463 | 14.5  |
| 539.0788 | 16.5  |
| 539.1175 | 17    |
| 539.1488 | 17.5  |
| 539.1813 | 20    |
| 539.215  | 20.75 |
| 539.2475 | 18.5  |
| 539.2813 | 20.75 |
| 539.3138 | 19.75 |
| 539.3463 | 19    |
| 539.385  | 19.5  |
| 539.4163 | 20.5  |
| 539.4463 | 16    |
| 539.4825 | 15.25 |
| 539.5163 | 17    |
| 539.5463 | 17.25 |
| 539.5788 | 19    |
| 539.6175 | 16.75 |
| 539.6488 | 19.75 |
| 539.6813 | 20    |
| 539.715  | 22.75 |
| 539.7475 | 17.25 |
| 539.7813 | 17.75 |
| 539.8138 | 20.5  |
| 539.8463 | 17.25 |
| 539.885  | 15.75 |
| 539.9163 | 19.75 |
| 539.9463 | 20.25 |
| 539.9825 | 17.5  |
| 540.0163 | 21    |
| 540.0463 | 19.5  |
| 540.0788 | 21.25 |
| 540.1175 | 17.25 |

|          |       |
|----------|-------|
| 540.1475 | 12.25 |
| 540.1838 | 13.75 |
| 540.2138 | 11.5  |
| 540.2488 | 13.25 |
| 540.2788 | 13.75 |
| 540.3138 | 13.25 |
| 540.3475 | 11.75 |
| 540.3788 | 15.75 |
| 540.41   | 13.5  |
| 540.4463 | 11.75 |
| 540.485  | 9.75  |
| 540.5125 | 11.5  |
| 540.5438 | 10.5  |
| 540.58   | 9.5   |
| 540.6138 | 13.5  |
| 540.6475 | 10.5  |
| 540.68   | 9.25  |
| 540.7138 | 9.25  |
| 540.7488 | 11    |
| 540.7788 | 10    |
| 540.8138 | 9     |
| 540.8475 | 9.75  |
| 540.8788 | 11    |
| 540.91   | 11.5  |
| 540.9463 | 10.25 |
| 540.9813 | 6.75  |
| 541.0125 | 9.25  |
| 541.0463 | 11.5  |
| 541.08   | 8.75  |
| 541.1138 | 9.5   |
| 541.1475 | 10.5  |
| 541.18   | 9     |
| 541.2138 | 11.25 |
| 541.2488 | 11.25 |
| 541.2788 | 8.75  |
| 541.3138 | 10.75 |
| 541.3475 | 13.25 |
| 541.3788 | 12.25 |
| 541.41   | 11.75 |
| 541.4463 | 13.75 |
| 541.4813 | 9     |
| 541.5125 | 8.75  |
| 541.5463 | 11.75 |
| 541.58   | 10    |
| 541.6138 | 8     |
| 541.6475 | 9.25  |
| 541.6775 | 11    |
| 541.7138 | 9.5   |
| 541.7488 | 12    |
| 541.7788 | 11.25 |

|          |       |
|----------|-------|
| 540.1488 | 18    |
| 540.1813 | 19.5  |
| 540.215  | 16.25 |
| 540.2475 | 19.75 |
| 540.2813 | 17.5  |
| 540.3138 | 17    |
| 540.3463 | 15.75 |
| 540.3825 | 15.75 |
| 540.4163 | 18.5  |
| 540.4488 | 16.75 |
| 540.4825 | 17.25 |
| 540.5163 | 16    |
| 540.5488 | 16.25 |
| 540.5788 | 21    |
| 540.6175 | 19    |
| 540.6488 | 18.25 |
| 540.6813 | 16.5  |
| 540.715  | 16.25 |
| 540.7475 | 17.75 |
| 540.7813 | 20.75 |
| 540.8138 | 22    |
| 540.8463 | 20    |
| 540.8825 | 20.25 |
| 540.9163 | 25    |
| 540.9488 | 20.5  |
| 540.9825 | 19.75 |
| 541.0138 | 22.25 |
| 541.0488 | 19    |
| 541.0788 | 18    |
| 541.115  | 17.75 |
| 541.1488 | 19.5  |
| 541.1813 | 18.75 |
| 541.215  | 17.75 |
| 541.2475 | 18.25 |
| 541.2813 | 18.25 |
| 541.3138 | 15    |
| 541.3463 | 21.25 |
| 541.3825 | 16.75 |
| 541.4163 | 15.75 |
| 541.4488 | 18.5  |
| 541.4825 | 18.75 |
| 541.5163 | 16    |
| 541.5513 | 15.5  |
| 541.5813 | 18    |
| 541.6163 | 20.75 |
| 541.6513 | 17.75 |
| 541.685  | 23    |
| 541.7175 | 20.25 |
| 541.7488 | 23.5  |
| 541.785  | 17    |

|          |       |          |       |
|----------|-------|----------|-------|
| 541.8138 | 12.5  | 541.815  | 15    |
| 541.8475 | 10.75 | 541.85   | 24    |
| 541.8813 | 10.5  | 541.8863 | 19.25 |
| 541.91   | 12.75 | 541.9175 | 18    |
| 541.9463 | 12.25 | 541.95   | 22.25 |
| 541.9813 | 10    | 541.985  | 20.75 |
| 542.0125 | 13.25 | 542.0163 | 20.5  |
| 542.0463 | 12.25 | 542.0513 | 18    |
| 542.08   | 12.75 | 542.0813 | 20.75 |
| 542.1138 | 13.5  | 542.1163 | 21.25 |
| 542.1475 | 17.5  | 542.1513 | 20.75 |
| 542.1775 | 13.5  | 542.185  | 17.75 |
| 542.2138 | 13.25 | 542.2175 | 17.5  |
| 542.2488 | 10.25 | 542.2488 | 19.25 |
| 542.2788 | 10.75 | 542.2838 | 18.75 |
| 542.3113 | 14.5  | 542.315  | 16.5  |
| 542.3475 | 10.75 | 542.3488 | 18.25 |
| 542.3788 | 10    | 542.3888 | 19    |
| 542.41   | 10.25 | 542.4175 | 20.25 |
| 542.4463 | 10.5  | 542.45   | 16.75 |
| 542.4825 | 9     | 542.485  | 18.75 |
| 542.515  | 11.5  | 542.5163 | 21    |
| 542.5463 | 9.75  | 542.5513 | 22.75 |
| 542.58   | 11.5  | 542.5813 | 15.25 |
| 542.6138 | 8.25  | 542.6163 | 16.5  |
| 542.6475 | 10.75 | 542.6513 | 20.25 |
| 542.6775 | 8.25  | 542.685  | 20.5  |
| 542.7138 | 12    | 542.7175 | 18.75 |
| 542.7488 | 11    | 542.7488 | 15.5  |
| 542.78   | 9     | 542.7838 | 21.25 |
| 542.8113 | 10.75 | 542.815  | 17.75 |
| 542.8475 | 8.25  | 542.8513 | 16    |
| 542.88   | 10.5  | 542.885  | 17    |
| 542.91   | 9.25  | 542.92   | 18.25 |
| 542.9488 | 7.75  | 542.95   | 18.25 |
| 542.9813 | 9.75  | 542.985  | 18.25 |
| 543.0125 | 11.5  | 543.0163 | 18    |
| 543.0463 | 8.75  | 543.0513 | 19    |
| 543.0813 | 8.75  | 543.0813 | 17.5  |
| 543.1138 | 9     | 543.1163 | 19.75 |
| 543.1475 | 11    | 543.1513 | 17.5  |
| 543.1775 | 8.75  | 543.185  | 18.75 |
| 543.2138 | 15.25 | 543.2175 | 18.5  |
| 543.2488 | 10    | 543.2488 | 20    |
| 543.28   | 12.75 | 543.2838 | 16.25 |
| 543.3113 | 11    | 543.315  | 20    |
| 543.3475 | 11.75 | 543.3525 | 20.5  |
| 543.38   | 14.75 | 543.385  | 17.75 |
| 543.41   | 12.75 | 543.42   | 17.75 |
| 543.4488 | 12.25 | 543.45   | 15.25 |

|          |       |          |       |
|----------|-------|----------|-------|
| 543.4813 | 10.75 | 543.485  | 16.25 |
| 543.5125 | 10    | 543.5188 | 20.25 |
| 543.5463 | 13.25 | 543.5513 | 19.75 |
| 543.58   | 11    | 543.5813 | 19.5  |
| 543.6138 | 12.25 | 543.6163 | 17.75 |
| 543.6475 | 12.25 | 543.6513 | 16.5  |
| 543.6775 | 12    | 543.6875 | 20    |
| 543.7138 | 9     | 543.7175 | 19.75 |
| 543.75   | 9     | 543.7488 | 21.25 |
| 543.78   | 12    | 543.7838 | 21    |
| 543.8113 | 12.5  | 543.815  | 21.75 |
| 543.8475 | 8.5   | 543.8525 | 18.75 |
| 543.88   | 9.25  | 543.885  | 15.75 |
| 543.91   | 12.75 | 543.92   | 16.75 |
| 543.9475 | 11.75 | 543.95   | 23.25 |
| 543.9813 | 12.75 | 543.985  | 19.25 |
| 544.015  | 16.5  | 544.0188 | 17    |
| 544.0463 | 12.5  | 544.0513 | 16    |
| 544.08   | 12.25 | 544.0813 | 21.5  |
| 544.1138 | 12    | 544.1163 | 16.25 |
| 544.1488 | 12.75 | 544.1513 | 16.25 |
| 544.1775 | 9     | 544.185  | 17.5  |
| 544.2138 | 11    | 544.2175 | 20.5  |
| 544.2488 | 12    | 544.2488 | 17.75 |
| 544.28   | 10.25 | 544.2838 | 16.75 |
| 544.3113 | 9.5   | 544.315  | 16.25 |
| 544.3475 | 14.75 | 544.3525 | 19    |
| 544.38   | 13    | 544.3838 | 22.75 |
| 544.41   | 12.5  | 544.42   | 24.25 |
| 544.4475 | 11.25 | 544.45   | 16.25 |
| 544.4813 | 8.5   | 544.485  | 19    |
| 544.515  | 12.25 | 544.5188 | 19.25 |
| 544.5463 | 10.25 | 544.5513 | 19.5  |
| 544.58   | 9.75  | 544.5813 | 19    |
| 544.6138 | 10.25 | 544.6163 | 15.75 |
| 544.6475 | 12.75 | 544.6525 | 15.5  |
| 544.6775 | 9.5   | 544.685  | 17    |
| 544.7138 | 11.5  | 544.7175 | 19.75 |
| 544.75   | 13.25 | 544.7488 | 15.5  |
| 544.78   | 9     | 544.7838 | 15.5  |
| 544.8113 | 13.25 | 544.815  | 17.25 |
| 544.8475 | 11.75 | 544.8525 | 17.5  |
| 544.88   | 13.75 | 544.8838 | 18    |
| 544.91   | 9.75  | 544.92   | 16.5  |
| 544.9475 | 11.5  | 544.95   | 17.25 |
| 544.9813 | 12.75 | 544.985  | 16.25 |
| 545.015  | 10.25 | 545.0188 | 14.25 |
| 545.0463 | 9     | 545.0513 | 18.5  |
| 545.0788 | 9.75  | 545.0813 | 14.5  |
| 545.1138 | 9.25  | 545.1163 | 16.25 |

|          |       |
|----------|-------|
| 545.1475 | 9.75  |
| 545.1775 | 9     |
| 545.2138 | 8.75  |
| 545.25   | 9.75  |
| 545.28   | 11.75 |
| 545.3113 | 7.75  |
| 545.3513 | 14    |
| 545.38   | 11.5  |
| 545.41   | 10.75 |
| 545.4475 | 11.5  |
| 545.4813 | 10    |
| 545.515  | 13.25 |
| 545.5463 | 11.25 |
| 545.5788 | 11.75 |
| 545.6138 | 8.25  |
| 545.6475 | 12.25 |
| 545.6775 | 12    |
| 545.7138 | 12.5  |
| 545.7475 | 13.5  |
| 545.78   | 11.25 |
| 545.8113 | 12    |
| 545.8475 | 11.75 |
| 545.88   | 13    |
| 545.91   | 9     |
| 545.9475 | 10.75 |
| 545.9813 | 9.75  |
| 546.015  | 10.75 |
| 546.0463 | 9.5   |
| 546.0788 | 12    |
| 546.1138 | 6.75  |
| 546.15   | 9     |
| 546.18   | 11    |
| 546.2138 | 9     |
| 546.2475 | 8.5   |
| 546.28   | 8.75  |
| 546.3113 | 10    |
| 546.3475 | 9.75  |
| 546.38   | 9.25  |
| 546.41   | 11.25 |
| 546.4475 | 12    |
| 546.4813 | 14.5  |
| 546.515  | 9.75  |
| 546.5463 | 10.5  |
| 546.5788 | 12    |
| 546.6138 | 10.25 |
| 546.6475 | 11    |
| 546.68   | 10.5  |
| 546.7113 | 12.25 |
| 546.7475 | 7.75  |
| 546.78   | 12.5  |

|          |       |
|----------|-------|
| 545.1513 | 16    |
| 545.185  | 14.75 |
| 545.2175 | 15    |
| 545.2488 | 17.75 |
| 545.2838 | 14.75 |
| 545.315  | 18    |
| 545.3525 | 18.75 |
| 545.385  | 18.25 |
| 545.42   | 19    |
| 545.45   | 21.5  |
| 545.485  | 22.5  |
| 545.5188 | 25.5  |
| 545.5513 | 18.5  |
| 545.5813 | 23    |
| 545.6163 | 21    |
| 545.6513 | 26.25 |
| 545.685  | 21    |
| 545.7175 | 25.25 |
| 545.75   | 18.25 |
| 545.7838 | 20.75 |
| 545.815  | 18.25 |
| 545.8525 | 21.25 |
| 545.885  | 22.25 |
| 545.92   | 24.75 |
| 545.95   | 22    |
| 545.985  | 25.75 |
| 546.0188 | 21    |
| 546.0513 | 23.25 |
| 546.0813 | 20.75 |
| 546.1163 | 26    |
| 546.1513 | 20.25 |
| 546.185  | 23.25 |
| 546.2175 | 18.5  |
| 546.25   | 16    |
| 546.2838 | 21.5  |
| 546.315  | 16.75 |
| 546.3525 | 19.5  |
| 546.385  | 20.75 |
| 546.42   | 19.5  |
| 546.45   | 16.5  |
| 546.485  | 18.25 |
| 546.5225 | 14.75 |
| 546.5513 | 15.25 |
| 546.5813 | 17    |
| 546.6188 | 16.75 |
| 546.6513 | 24    |
| 546.685  | 20    |
| 546.7175 | 19.25 |
| 546.7525 | 23    |
| 546.7863 | 22.5  |



|          |       |          |       |
|----------|-------|----------|-------|
| 546.8113 | 12.25 | 546.8175 | 19.75 |
| 546.8475 | 9.75  | 546.8538 | 20.5  |
| 546.88   | 9.5   | 546.8863 | 22    |
| 546.91   | 14    | 546.9213 | 21    |
| 546.9475 | 12.75 | 546.9538 | 21.5  |
| 546.9838 | 10.25 | 546.9863 | 19.25 |
| 547.0175 | 12    | 547.0225 | 22.75 |
| 547.0488 | 13    | 547.0525 | 21    |
| 547.0813 | 10.75 | 547.0838 | 21.25 |
| 547.1175 | 13    | 547.1213 | 20    |
| 547.15   | 11.5  | 547.1538 | 17.75 |
| 547.1838 | 14.75 | 547.1875 | 18.5  |
| 547.2138 | 10.75 | 547.22   | 16.5  |
| 547.2488 | 12    | 547.2525 | 21    |
| 547.2813 | 7.25  | 547.2863 | 18.75 |
| 547.3125 | 11    | 547.3175 | 17.75 |
| 547.35   | 12    | 547.3525 | 19.5  |
| 547.3825 | 12.5  | 547.3863 | 15.75 |
| 547.4125 | 14.25 | 547.42   | 15    |
| 547.4488 | 8.75  | 547.4538 | 16.5  |
| 547.4863 | 11.25 | 547.4888 | 17    |
| 547.5175 | 13    | 547.5225 | 20    |
| 547.5488 | 10.25 | 547.555  | 14.5  |
| 547.5813 | 8.25  | 547.5838 | 18.25 |
| 547.6175 | 12    | 547.6213 | 14.25 |
| 547.6488 | 12.75 | 547.6513 | 14    |
| 547.6838 | 11.75 | 547.6875 | 17.75 |
| 547.7138 | 10.25 | 547.72   | 21.5  |
| 547.7513 | 9     | 547.7525 | 15.5  |
| 547.7813 | 11    | 547.7863 | 19.5  |
| 547.8125 | 8.75  | 547.8175 | 19.25 |
| 547.8475 | 7.75  | 547.8525 | 17.75 |
| 547.8825 | 10.25 | 547.8863 | 16.75 |
| 547.9125 | 10.25 | 547.92   | 15    |
| 547.9488 | 14.5  | 547.9538 | 17.5  |
| 547.9863 | 9.25  | 547.9888 | 20.75 |
| 548.0163 | 7.5   | 548.0225 | 20.5  |
| 548.0488 | 13.25 | 548.0525 | 22.25 |
| 548.0813 | 9.75  | 548.0863 | 25.75 |
| 548.1175 | 8.75  | 548.1238 | 18.5  |
| 548.1488 | 9.25  | 548.1538 | 22    |
| 548.1838 | 9.5   | 548.19   | 26.75 |
| 548.2163 | 11.25 | 548.2225 | 20.5  |
| 548.2488 | 9.75  | 548.2563 | 25.75 |
| 548.2813 | 7.5   | 548.2888 | 23.75 |
| 548.3125 | 9.5   | 548.32   | 29.25 |
| 548.3475 | 10.75 | 548.355  | 28.5  |
| 548.3825 | 8.5   | 548.3875 | 26.75 |
| 548.4125 | 8.5   | 548.4213 | 26.75 |
| 548.4488 | 9.75  | 548.455  | 25.75 |

|          |       |
|----------|-------|
| 548.4863 | 9     |
| 548.5163 | 9     |
| 548.5488 | 8.75  |
| 548.5813 | 9     |
| 548.6175 | 10.75 |
| 548.6488 | 7.25  |
| 548.6838 | 8.75  |
| 548.7163 | 7.75  |
| 548.7538 | 9     |
| 548.7813 | 10    |
| 548.8125 | 10.75 |
| 548.8475 | 10    |
| 548.8825 | 12.25 |
| 548.915  | 11.75 |
| 548.9488 | 9     |
| 548.9863 | 12.5  |
| 549.0163 | 10    |
| 549.0488 | 12.75 |
| 549.0838 | 14.25 |
| 549.1188 | 18    |
| 549.15   | 13    |
| 549.1863 | 15    |
| 549.2188 | 13.5  |
| 549.2513 | 17    |
| 549.2838 | 13.75 |
| 549.315  | 14.5  |
| 549.3525 | 20    |
| 549.3863 | 15.25 |
| 549.4188 | 11.5  |
| 549.4525 | 16.25 |
| 549.4888 | 14.75 |
| 549.52   | 14.75 |
| 549.5525 | 15.25 |
| 549.5875 | 16.25 |
| 549.6213 | 14.5  |
| 549.6525 | 13.5  |
| 549.6888 | 17.5  |
| 549.7213 | 12.75 |
| 549.7538 | 12.75 |
| 549.7863 | 11.25 |
| 549.8163 | 12.25 |
| 549.8525 | 14.5  |
| 549.8863 | 12.25 |
| 549.9188 | 11.75 |
| 549.9525 | 14    |
| 549.9888 | 11.75 |
| 550.0188 | 15.25 |
| 550.0525 | 10.25 |
| 550.0875 | 10.5  |
| 550.1213 | 11.25 |

|          |       |
|----------|-------|
| 548.4913 | 23    |
| 548.5238 | 21.25 |
| 548.5538 | 21.5  |
| 548.5863 | 21.25 |
| 548.6238 | 27    |
| 548.6538 | 23.75 |
| 548.69   | 25    |
| 548.7225 | 26.5  |
| 548.7563 | 21.5  |
| 548.7888 | 23.75 |
| 548.82   | 25    |
| 548.855  | 21.5  |
| 548.8875 | 25.75 |
| 548.9238 | 25    |
| 548.9538 | 24    |
| 548.9913 | 25.75 |
| 549.0238 | 26    |
| 549.0538 | 19    |
| 549.0863 | 19.75 |
| 549.1238 | 24.25 |
| 549.1538 | 24.25 |
| 549.19   | 21.75 |
| 549.2225 | 24    |
| 549.2563 | 21    |
| 549.2888 | 22.75 |
| 549.32   | 23.5  |
| 549.355  | 23.5  |
| 549.3875 | 26.75 |
| 549.4213 | 22.75 |
| 549.4538 | 22.75 |
| 549.4913 | 22.75 |
| 549.5238 | 26    |
| 549.5538 | 22.25 |
| 549.5888 | 28    |
| 549.6238 | 24.25 |
| 549.6538 | 23.5  |
| 549.69   | 22.75 |
| 549.7238 | 24.25 |
| 549.7563 | 25.25 |
| 549.7888 | 24.25 |
| 549.82   | 23.75 |
| 549.855  | 24.25 |
| 549.8875 | 23.75 |
| 549.9213 | 21.5  |
| 549.9538 | 20.5  |
| 549.9913 | 18    |
| 550.0238 | 23    |
| 550.0538 | 21.25 |
| 550.0888 | 20.25 |
| 550.1238 | 19.25 |

|          |       |
|----------|-------|
| 550.1525 | 11.75 |
| 550.1888 | 11    |
| 550.2213 | 12.25 |
| 550.2538 | 11.75 |
| 550.2838 | 13.75 |
| 550.3163 | 12.75 |
| 550.355  | 13    |
| 550.3863 | 16.5  |
| 550.4188 | 14.5  |
| 550.4525 | 13    |
| 550.4888 | 14.5  |
| 550.5188 | 15    |
| 550.5525 | 11    |
| 550.5875 | 13.75 |
| 550.6213 | 11    |
| 550.6525 | 11.75 |
| 550.6913 | 12.75 |
| 550.7238 | 10.5  |
| 550.7538 | 11.5  |
| 550.7838 | 13.25 |
| 550.8163 | 11.5  |
| 550.8525 | 12.5  |
| 550.8863 | 12.25 |
| 550.9188 | 10.5  |
| 550.9525 | 11.25 |
| 550.9888 | 13.5  |
| 551.0188 | 10.75 |
| 551.0525 | 10    |
| 551.0875 | 11.5  |
| 551.12   | 9.75  |
| 551.1525 | 13.75 |
| 551.1888 | 16.5  |
| 551.2213 | 10.75 |
| 551.2538 | 10.75 |
| 551.2838 | 11    |
| 551.3188 | 12.75 |
| 551.3513 | 10.5  |
| 551.3863 | 12.75 |
| 551.4188 | 9.25  |
| 551.4525 | 11.5  |
| 551.4888 | 10.5  |
| 551.5188 | 9.25  |
| 551.5525 | 10.25 |
| 551.5875 | 9.5   |
| 551.62   | 13.75 |
| 551.6525 | 9     |
| 551.6888 | 13.75 |
| 551.7213 | 12.25 |
| 551.7538 | 9.5   |
| 551.7838 | 11.25 |

|          |       |
|----------|-------|
| 550.1538 | 19.25 |
| 550.1875 | 22.25 |
| 550.2238 | 23.5  |
| 550.2563 | 19.5  |
| 550.2888 | 22.5  |
| 550.32   | 20.5  |
| 550.355  | 20.25 |
| 550.3875 | 21.75 |
| 550.4213 | 25    |
| 550.4538 | 24    |
| 550.4925 | 23    |
| 550.5238 | 26.25 |
| 550.5538 | 22.25 |
| 550.5888 | 19    |
| 550.6238 | 23.25 |
| 550.6563 | 21.75 |
| 550.6875 | 24    |
| 550.7238 | 22    |
| 550.7563 | 23    |
| 550.7888 | 21.75 |
| 550.8213 | 20.25 |
| 550.855  | 23.25 |
| 550.8875 | 20.5  |
| 550.92   | 25.5  |
| 550.9538 | 21    |
| 550.9925 | 22    |
| 551.0238 | 21.25 |
| 551.0538 | 24    |
| 551.0888 | 20.25 |
| 551.1213 | 22.5  |
| 551.1538 | 26.25 |
| 551.1875 | 24.75 |
| 551.2238 | 25.5  |
| 551.2563 | 21.75 |
| 551.2888 | 23.75 |
| 551.3213 | 23    |
| 551.355  | 21.5  |
| 551.3875 | 19.5  |
| 551.42   | 22    |
| 551.4563 | 19.5  |
| 551.4925 | 19.75 |
| 551.5238 | 22.75 |
| 551.5538 | 20    |
| 551.59   | 21.75 |
| 551.6213 | 17.75 |
| 551.6538 | 21    |
| 551.6875 | 20.5  |
| 551.7238 | 18    |
| 551.7563 | 18.75 |
| 551.7888 | 17    |

|          |       |          |       |
|----------|-------|----------|-------|
| 551.8163 | 11.25 | 551.8213 | 19    |
| 551.8513 | 10.5  | 551.855  | 18.5  |
| 551.8863 | 11.75 | 551.8875 | 19    |
| 551.9188 | 12.75 | 551.92   | 19.75 |
| 551.9525 | 10.25 | 551.9563 | 15.5  |
| 551.9888 | 11.75 | 551.9925 | 22.75 |
| 552.0188 | 16.25 | 552.0238 | 19.75 |
| 552.0513 | 11.5  | 552.0563 | 18.25 |
| 552.0875 | 10.75 | 552.09   | 21    |
| 552.12   | 12.25 | 552.1213 | 20.5  |
| 552.1525 | 7.75  | 552.1538 | 20.5  |
| 552.1888 | 11    | 552.1875 | 22.5  |
| 552.2213 | 12.25 | 552.2238 | 19.25 |
| 552.2538 | 10.75 | 552.2563 | 16.5  |
| 552.2838 | 9.5   | 552.2888 | 17.25 |
| 552.3188 | 11    | 552.3213 | 19.25 |
| 552.3513 | 11    | 552.355  | 15.75 |
| 552.3863 | 13.75 | 552.3875 | 19    |
| 552.42   | 11    | 552.42   | 15.5  |
| 552.4525 | 16.25 | 552.455  | 19.75 |
| 552.4888 | 12.25 | 552.4925 | 17.25 |
| 552.5188 | 10.25 | 552.5238 | 20.75 |
| 552.5513 | 11    | 552.5563 | 22    |
| 552.5875 | 12.75 | 552.59   | 18.5  |
| 552.62   | 13    | 552.6213 | 16    |
| 552.6525 | 12.25 | 552.6538 | 16.5  |
| 552.6888 | 13    | 552.6875 | 18.25 |
| 552.7213 | 14    | 552.7263 | 12.25 |
| 552.7538 | 11.75 | 552.7563 | 19    |
| 552.7838 | 15.5  | 552.7888 | 16.75 |
| 552.8213 | 9.75  | 552.8213 | 19.5  |
| 552.8513 | 16    | 552.855  | 16    |
| 552.8863 | 13.5  | 552.8875 | 15.75 |
| 552.92   | 15.75 | 552.92   | 16.75 |
| 552.9525 | 14.75 | 552.955  | 15    |
| 552.9888 | 16.5  | 552.9925 | 16.25 |
| 553.0188 | 13    | 553.0238 | 18    |
| 553.0513 | 14.5  | 553.0563 | 16.75 |
| 553.0875 | 10.25 | 553.09   | 17.5  |
| 553.12   | 9.75  | 553.1238 | 15.25 |
| 553.1525 | 13.25 | 553.1538 | 15.5  |
| 553.1888 | 11.75 | 553.1888 | 16.25 |
| 553.2213 | 11    | 553.2263 | 16    |
| 553.2538 | 9.5   | 553.2563 | 19.75 |
| 553.2838 | 14.75 | 553.2888 | 14.75 |
| 553.3163 | 12    | 553.3213 | 17    |
| 553.3513 | 11.5  | 553.355  | 16.75 |
| 553.3863 | 9.25  | 553.3863 | 18.5  |
| 553.42   | 9.25  | 553.42   | 16.5  |
| 553.4525 | 8.75  | 553.455  | 18    |

|          |       |
|----------|-------|
| 553.4888 | 7.25  |
| 553.5188 | 8     |
| 553.5513 | 10.75 |
| 553.5875 | 13    |
| 553.62   | 9.75  |
| 553.655  | 10.5  |
| 553.6888 | 14.25 |
| 553.7213 | 11.75 |
| 553.7538 | 13    |
| 553.7838 | 10.25 |
| 553.8163 | 13.5  |
| 553.8513 | 11.75 |
| 553.8863 | 12.5  |
| 553.92   | 10.5  |
| 553.9525 | 12.25 |
| 553.9888 | 12.5  |
| 554.0188 | 13.75 |
| 554.0513 | 13.25 |
| 554.0875 | 12    |
| 554.12   | 15.75 |
| 554.155  | 14.75 |
| 554.1888 | 10.5  |
| 554.2238 | 11.75 |
| 554.2538 | 14.75 |
| 554.2838 | 12.75 |
| 554.3163 | 12.75 |
| 554.3513 | 13.5  |
| 554.3863 | 11.75 |
| 554.42   | 13    |
| 554.4525 | 13.25 |
| 554.4888 | 13.75 |
| 554.5188 | 16.5  |
| 554.5538 | 10.5  |
| 554.585  | 14.5  |
| 554.62   | 12    |
| 554.655  | 9.75  |
| 554.6888 | 11.75 |
| 554.7238 | 11    |
| 554.7538 | 10.25 |
| 554.7838 | 13.25 |
| 554.8163 | 12.75 |
| 554.8513 | 10.75 |
| 554.8863 | 11    |
| 554.92   | 9.75  |
| 554.9525 | 9.25  |
| 554.9888 | 12.25 |
| 555.0188 | 12.5  |
| 555.0538 | 10.75 |
| 555.085  | 8.75  |
| 555.12   | 13    |

|          |       |
|----------|-------|
| 553.4925 | 19    |
| 553.5238 | 13.75 |
| 553.5563 | 17.25 |
| 553.59   | 17.75 |
| 553.6213 | 15.5  |
| 553.6538 | 15.75 |
| 553.6888 | 17.5  |
| 553.7263 | 19.25 |
| 553.7563 | 17.75 |
| 553.79   | 20.25 |
| 553.8213 | 14.5  |
| 553.855  | 18.75 |
| 553.8863 | 21.5  |
| 553.92   | 15    |
| 553.955  | 17.5  |
| 553.9925 | 17    |
| 554.0238 | 21.5  |
| 554.0563 | 17.5  |
| 554.09   | 23    |
| 554.1213 | 19.75 |
| 554.1538 | 20.5  |
| 554.1888 | 24.25 |
| 554.2263 | 25.5  |
| 554.2563 | 22.75 |
| 554.29   | 20.25 |
| 554.3213 | 20.5  |
| 554.355  | 18.25 |
| 554.3863 | 20.25 |
| 554.42   | 18    |
| 554.455  | 17.5  |
| 554.4925 | 17    |
| 554.5238 | 23.75 |
| 554.5563 | 21.25 |
| 554.59   | 15.25 |
| 554.6213 | 15    |
| 554.6538 | 17.25 |
| 554.6888 | 18    |
| 554.7213 | 17.75 |
| 554.7563 | 19.75 |
| 554.79   | 17.75 |
| 554.8213 | 16.25 |
| 554.855  | 18    |
| 554.8863 | 20.5  |
| 554.92   | 18.5  |
| 554.9575 | 17    |
| 554.9925 | 18.75 |
| 555.0238 | 22.25 |
| 555.0563 | 22.25 |
| 555.09   | 18    |
| 555.1213 | 24    |

|          |       |
|----------|-------|
| 555.155  | 9.5   |
| 555.1888 | 10.75 |
| 555.2213 | 10.75 |
| 555.2538 | 14.75 |
| 555.2838 | 8.75  |
| 555.3163 | 11    |
| 555.3513 | 14.75 |
| 555.3863 | 10.75 |
| 555.42   | 11    |
| 555.4525 | 9.75  |
| 555.4913 | 10.25 |
| 555.5188 | 12    |
| 555.5538 | 11.75 |
| 555.585  | 12.25 |
| 555.62   | 11    |
| 555.6563 | 13.5  |
| 555.6888 | 14.5  |
| 555.7213 | 14.5  |
| 555.7538 | 11.25 |
| 555.7838 | 9.5   |
| 555.8163 | 9     |
| 555.85   | 12.25 |
| 555.8875 | 10.5  |
| 555.9225 | 10.25 |
| 555.9525 | 10    |
| 555.9888 | 11.25 |
| 556.0188 | 10.5  |
| 556.0538 | 9.25  |
| 556.085  | 10.5  |
| 556.12   | 10.75 |
| 556.1563 | 9.5   |
| 556.1888 | 13.25 |
| 556.2213 | 13    |
| 556.2538 | 12.75 |
| 556.285  | 15.5  |
| 556.3163 | 14    |
| 556.3513 | 10.75 |
| 556.3875 | 11.75 |
| 556.42   | 15.75 |
| 556.4525 | 13.75 |
| 556.4888 | 10.5  |
| 556.52   | 11.75 |
| 556.5538 | 13.25 |
| 556.585  | 10.25 |
| 556.62   | 10    |
| 556.6563 | 10.75 |
| 556.6888 | 12    |
| 556.7213 | 8.75  |
| 556.7538 | 9.25  |
| 556.785  | 9.25  |

|          |       |
|----------|-------|
| 555.1513 | 19.75 |
| 555.1888 | 24    |
| 555.2238 | 24.5  |
| 555.2563 | 24    |
| 555.29   | 19.25 |
| 555.3238 | 21.75 |
| 555.355  | 20    |
| 555.3863 | 23.25 |
| 555.4225 | 20.25 |
| 555.4575 | 20.75 |
| 555.4925 | 22    |
| 555.5238 | 20    |
| 555.5563 | 21.75 |
| 555.59   | 22.75 |
| 555.6238 | 21    |
| 555.6513 | 20    |
| 555.6888 | 21.25 |
| 555.7213 | 18    |
| 555.7563 | 18.75 |
| 555.79   | 19.25 |
| 555.8238 | 21.25 |
| 555.855  | 18.75 |
| 555.8888 | 16.75 |
| 555.925  | 22.5  |
| 555.96   | 22    |
| 555.995  | 18.5  |
| 556.0288 | 17.5  |
| 556.0588 | 14.5  |
| 556.0913 | 17    |
| 556.1225 | 17.25 |
| 556.1525 | 19.5  |
| 556.1925 | 14.75 |
| 556.2225 | 15.25 |
| 556.2575 | 13.25 |
| 556.2913 | 17.75 |
| 556.3263 | 15.5  |
| 556.3575 | 15.5  |
| 556.3888 | 15.75 |
| 556.425  | 17    |
| 556.46   | 15    |
| 556.4925 | 15    |
| 556.5288 | 14.5  |
| 556.5588 | 17    |
| 556.5913 | 18.25 |
| 556.6225 | 15.5  |
| 556.6525 | 14    |
| 556.6925 | 19    |
| 556.7225 | 19    |
| 556.7575 | 16.5  |
| 556.7938 | 17    |

|          |       |          |       |
|----------|-------|----------|-------|
| 556.8163 | 10.25 | 556.8263 | 18.5  |
| 556.8513 | 8.75  | 556.8575 | 12.25 |
| 556.8875 | 10    | 556.8888 | 22.5  |
| 556.92   | 9.25  | 556.9238 | 21.5  |
| 556.9513 | 10    | 556.9613 | 20.5  |
| 556.9888 | 11    | 556.9925 | 15.5  |
| 557.0188 | 8     | 557.0288 | 18.5  |
| 557.0538 | 11    | 557.0588 | 17.25 |
| 557.085  | 10.5  | 557.0913 | 16.75 |
| 557.1175 | 14.5  | 557.1225 | 15.25 |
| 557.1563 | 12.75 | 557.1525 | 18.75 |
| 557.1888 | 12.5  | 557.1925 | 16.25 |
| 557.2213 | 9     | 557.2225 | 14.5  |
| 557.2538 | 10.25 | 557.2575 | 15.25 |
| 557.285  | 12.25 | 557.2913 | 17    |
| 557.3163 | 11.25 | 557.3263 | 19.75 |
| 557.35   | 10.25 | 557.3575 | 17.75 |
| 557.3875 | 10.25 | 557.3888 | 15.25 |
| 557.42   | 14.5  | 557.4238 | 16.75 |
| 557.4513 | 12.25 | 557.46   | 17.75 |
| 557.4888 | 11.75 | 557.4925 | 21.75 |
| 557.5188 | 6.5   | 557.5288 | 17.5  |
| 557.5538 | 11.25 | 557.5588 | 16    |
| 557.585  | 8.75  | 557.5913 | 18.75 |
| 557.62   | 9     | 557.625  | 18.25 |
| 557.6563 | 11    | 557.6575 | 19.5  |
| 557.6888 | 8.25  | 557.695  | 16.5  |
| 557.7238 | 9.75  | 557.725  | 20.75 |
| 557.7538 | 8.75  | 557.76   | 19.5  |
| 557.785  | 10.25 | 557.7925 | 22.25 |
| 557.8163 | 8.25  | 557.8275 | 16.5  |
| 557.85   | 10.25 | 557.8588 | 16.5  |
| 557.8875 | 7.75  | 557.89   | 18.5  |
| 557.92   | 10.25 | 557.9275 | 14.75 |
| 557.9513 | 10    | 557.9613 | 21.25 |
| 557.9888 | 9.75  | 557.9938 | 18.25 |
| 558.0188 | 8.5   | 558.0313 | 14.5  |
| 558.0538 | 11.75 | 558.0613 | 22    |
| 558.085  | 12    | 558.0938 | 17.25 |
| 558.12   | 11.5  | 558.125  | 22.75 |
| 558.1563 | 12.75 | 558.1575 | 22.75 |
| 558.1888 | 13.5  | 558.195  | 21.25 |
| 558.2238 | 9.5   | 558.225  | 20    |
| 558.2538 | 12.5  | 558.2588 | 23    |
| 558.285  | 10    | 558.2925 | 19.25 |
| 558.3163 | 11.25 | 558.3275 | 22.25 |
| 558.35   | 9     | 558.3588 | 18.75 |
| 558.3875 | 8.75  | 558.39   | 19.25 |
| 558.42   | 12    | 558.4275 | 18.25 |
| 558.4513 | 7.5   | 558.4613 | 23    |

|          |       |
|----------|-------|
| 558.4888 | 13.25 |
| 558.5213 | 9.5   |
| 558.5538 | 10.5  |
| 558.585  | 12    |
| 558.62   | 11.75 |
| 558.6563 | 13    |
| 558.6888 | 11.75 |
| 558.7238 | 13    |
| 558.7538 | 11    |
| 558.785  | 11    |
| 558.8163 | 11    |
| 558.85   | 10    |
| 558.8863 | 9.25  |
| 558.92   | 8     |
| 558.9513 | 8.25  |
| 558.9888 | 8.5   |
| 559.0213 | 7.5   |
| 559.0538 | 10.25 |
| 559.085  | 9.75  |
| 559.12   | 8.5   |
| 559.1563 | 10.25 |
| 559.1888 | 10.25 |
| 559.2238 | 11.25 |
| 559.2538 | 11.75 |
| 559.285  | 13.25 |
| 559.3163 | 15    |
| 559.3525 | 11.25 |
| 559.3863 | 13    |
| 559.42   | 14.5  |
| 559.4513 | 11    |
| 559.4888 | 12.25 |
| 559.5213 | 11.75 |
| 559.5538 | 10.75 |
| 559.585  | 11.75 |
| 559.62   | 15    |
| 559.6563 | 13.75 |
| 559.6888 | 12.5  |
| 559.7238 | 13.25 |
| 559.7538 | 13.25 |
| 559.785  | 12.75 |
| 559.8163 | 17.5  |
| 559.8538 | 14    |
| 559.8863 | 12.5  |
| 559.92   | 13.25 |
| 559.9513 | 13    |
| 559.9888 | 12.25 |
| 560.0213 | 14.75 |
| 560.0538 | 13.25 |
| 560.085  | 13.5  |
| 560.1175 | 12    |

|          |       |
|----------|-------|
| 558.4938 | 19.25 |
| 558.5313 | 17.75 |
| 558.5613 | 19.25 |
| 558.5938 | 15.25 |
| 558.625  | 18    |
| 558.6575 | 20.5  |
| 558.695  | 22.75 |
| 558.725  | 20.25 |
| 558.7588 | 21    |
| 558.7925 | 21.5  |
| 558.8275 | 17.25 |
| 558.8613 | 22.5  |
| 558.89   | 18    |
| 558.9263 | 19    |
| 558.9613 | 17.75 |
| 558.9938 | 20.25 |
| 559.0313 | 18.75 |
| 559.0625 | 15.25 |
| 559.0938 | 20.5  |
| 559.125  | 15.5  |
| 559.16   | 16.5  |
| 559.195  | 15.75 |
| 559.225  | 15    |
| 559.2613 | 17    |
| 559.2925 | 17.25 |
| 559.3275 | 15.25 |
| 559.3588 | 18.5  |
| 559.39   | 18.75 |
| 559.4263 | 16.25 |
| 559.4613 | 24    |
| 559.4925 | 17.5  |
| 559.5313 | 17.5  |
| 559.5625 | 18    |
| 559.5938 | 19.25 |
| 559.625  | 22    |
| 559.66   | 17.75 |
| 559.695  | 13.75 |
| 559.725  | 20.5  |
| 559.7613 | 15    |
| 559.7925 | 14    |
| 559.8275 | 14.75 |
| 559.8588 | 15    |
| 559.8913 | 15.25 |
| 559.9263 | 15.75 |
| 559.9613 | 15.5  |
| 559.9925 | 13    |
| 560.0288 | 15.25 |
| 560.0625 | 15.5  |
| 560.0938 | 17.25 |
| 560.125  | 15.25 |



|          |       |          |       |
|----------|-------|----------|-------|
| 560.1538 | 10.5  | 560.16   | 13.5  |
| 560.1888 | 14    | 560.195  | 14.75 |
| 560.2213 | 13.5  | 560.225  | 14.5  |
| 560.255  | 12.75 | 560.2613 | 15.25 |
| 560.285  | 12.75 | 560.2925 | 14.25 |
| 560.3163 | 11.5  | 560.3275 | 15.75 |
| 560.3525 | 14    | 560.3588 | 14.25 |
| 560.3888 | 12.5  | 560.3913 | 15.5  |
| 560.4263 | 14    | 560.4263 | 16.5  |
| 560.455  | 12.75 | 560.4613 | 14.25 |
| 560.495  | 13.75 | 560.4925 | 14.75 |
| 560.525  | 12.5  | 560.5288 | 13.25 |
| 560.5575 | 13.5  | 560.5625 | 15.25 |
| 560.5888 | 11.75 | 560.5938 | 17.25 |
| 560.6213 | 8.25  | 560.625  | 16.25 |
| 560.6588 | 10.25 | 560.66   | 17.75 |
| 560.6938 | 7.75  | 560.6925 | 17    |
| 560.7263 | 10.75 | 560.725  | 17.75 |
| 560.7588 | 9.25  | 560.7613 | 17.25 |
| 560.79   | 9.5   | 560.7925 | 20.5  |
| 560.8225 | 9.25  | 560.8275 | 16.5  |
| 560.8563 | 11.25 | 560.8588 | 16    |
| 560.8925 | 11.75 | 560.8925 | 15.25 |
| 560.9238 | 10    | 560.9263 | 16.25 |
| 560.9563 | 11    | 560.9613 | 20.5  |
| 560.995  | 10    | 560.9925 | 21.5  |
| 561.025  | 11.5  | 561.0288 | 17    |
| 561.0575 | 10.5  | 561.0625 | 18.75 |
| 561.09   | 9     | 561.0938 | 16.5  |
| 561.1213 | 14.25 | 561.125  | 18.25 |
| 561.1588 | 12    | 561.16   | 20    |
| 561.1925 | 13    | 561.1925 | 19    |
| 561.2263 | 12    | 561.225  | 15.5  |
| 561.2588 | 9.75  | 561.2613 | 16.5  |
| 561.29   | 13.25 | 561.2925 | 18.25 |
| 561.32   | 12.5  | 561.3275 | 14.75 |
| 561.3563 | 12.75 | 561.3588 | 15    |
| 561.3925 | 12.5  | 561.3925 | 18.25 |
| 561.4225 | 8.5   | 561.4263 | 21    |
| 561.4563 | 13.25 | 561.4613 | 20.25 |
| 561.495  | 10.75 | 561.4925 | 20.5  |
| 561.525  | 10    | 561.5288 | 23    |
| 561.5575 | 9.5   | 561.5625 | 24.5  |
| 561.59   | 7.5   | 561.5938 | 21    |
| 561.6213 | 11    | 561.625  | 28.75 |
| 561.6588 | 11    | 561.66   | 24.25 |
| 561.6925 | 10.75 | 561.6925 | 24    |
| 561.7288 | 9.25  | 561.725  | 23.25 |
| 561.7588 | 12    | 561.7613 | 22.25 |
| 561.79   | 11.75 | 561.7913 | 21.25 |

|          |       |          |       |
|----------|-------|----------|-------|
| 561.82   | 10.5  | 561.8275 | 20.25 |
| 561.8563 | 11    | 561.8588 | 21.25 |
| 561.8925 | 10.75 | 561.8925 | 21.5  |
| 561.9225 | 11.5  | 561.9263 | 24.75 |
| 561.9563 | 11.75 | 561.9613 | 19.75 |
| 561.995  | 10.25 | 561.9925 | 21.75 |
| 562.025  | 10    | 562.0288 | 25    |
| 562.0575 | 10    | 562.0625 | 22.75 |
| 562.09   | 13.75 | 562.0938 | 21    |
| 562.1213 | 11.5  | 562.125  | 18    |
| 562.1588 | 10.25 | 562.16   | 19.25 |
| 562.1925 | 13    | 562.1925 | 20.5  |
| 562.2263 | 10.5  | 562.225  | 20    |
| 562.2588 | 10.75 | 562.2613 | 23    |
| 562.29   | 11.5  | 562.2913 | 18.5  |
| 562.32   | 14.5  | 562.3275 | 21.5  |
| 562.3563 | 12.75 | 562.3588 | 18.75 |
| 562.3925 | 9.75  | 562.395  | 23.75 |
| 562.4225 | 13.25 | 562.4288 | 13.25 |
| 562.4588 | 12.25 | 562.4625 | 22.25 |
| 562.495  | 9.5   | 562.4963 | 15    |
| 562.525  | 12.5  | 562.5313 | 23.5  |
| 562.5575 | 9.75  | 562.565  | 21    |
| 562.59   | 11    | 562.595  | 18    |
| 562.6213 | 9.25  | 562.6263 | 17.75 |
| 562.6613 | 9     | 562.6613 | 17.5  |
| 562.6975 | 11.5  | 562.695  | 18.25 |
| 562.7313 | 9.75  | 562.7275 | 17.75 |
| 562.7613 | 12.5  | 562.7625 | 16    |
| 562.7925 | 8.25  | 562.7963 | 19.5  |
| 562.8225 | 9     | 562.83   | 16.25 |
| 562.8575 | 7.25  | 562.8613 | 16.75 |
| 562.8938 | 8.5   | 562.895  | 14.75 |
| 562.9238 | 8.25  | 562.9288 | 19.5  |
| 562.96   | 6.75  | 562.9613 | 17.75 |
| 562.9963 | 8.5   | 562.9963 | 19.25 |
| 563.0263 | 8     | 563.0313 | 16    |
| 563.0588 | 12    | 563.065  | 18.5  |
| 563.0925 | 10    | 563.095  | 16.5  |
| 563.1238 | 10.25 | 563.1288 | 19.75 |
| 563.1613 | 9.5   | 563.1613 | 19    |
| 563.195  | 8     | 563.195  | 18.25 |
| 563.2288 | 9.5   | 563.2275 | 21    |
| 563.2613 | 9.75  | 563.2625 | 19.5  |
| 563.2925 | 11.75 | 563.295  | 18.75 |
| 563.325  | 8.5   | 563.33   | 21.75 |
| 563.3575 | 10.25 | 563.3613 | 17    |
| 563.3925 | 10.75 | 563.395  | 19.75 |
| 563.4238 | 10    | 563.4288 | 17.25 |
| 563.46   | 8.5   | 563.4613 | 16.75 |

|          |       |
|----------|-------|
| 563.4963 | 11    |
| 563.5263 | 8.75  |
| 563.5588 | 10.25 |
| 563.5925 | 9     |
| 563.6238 | 12.5  |
| 563.6613 | 9.75  |
| 563.695  | 10.75 |
| 563.7288 | 7     |
| 563.7613 | 10.25 |
| 563.7925 | 9     |
| 563.825  | 6     |
| 563.8575 | 8     |
| 563.8925 | 11.75 |
| 563.9238 | 7.25  |
| 563.96   | 9.75  |
| 563.9963 | 10.5  |
| 564.0288 | 10.5  |
| 564.0588 | 13    |
| 564.0925 | 10.75 |
| 564.1238 | 10.5  |
| 564.1613 | 9     |
| 564.195  | 10.25 |
| 564.2288 | 10.75 |
| 564.2613 | 12    |
| 564.2925 | 10.5  |
| 564.325  | 9.25  |
| 564.3575 | 6.5   |
| 564.3925 | 6.75  |
| 564.4263 | 8.75  |
| 564.46   | 7.5   |
| 564.4963 | 11.5  |
| 564.5263 | 8.5   |
| 564.5613 | 8.75  |
| 564.5925 | 7.75  |
| 564.6238 | 8.75  |
| 564.6613 | 8.5   |
| 564.6963 | 10    |
| 564.7288 | 8     |
| 564.7613 | 8.75  |
| 564.7925 | 7.5   |
| 564.825  | 8.75  |
| 564.8575 | 5.5   |
| 564.8925 | 9.75  |
| 564.9263 | 8     |
| 564.9588 | 10.25 |
| 564.9963 | 10.75 |
| 565.0263 | 9.75  |
| 565.06   | 13.75 |
| 565.0925 | 10.75 |
| 565.125  | 10    |

|          |       |
|----------|-------|
| 563.4963 | 19.25 |
| 563.5313 | 15    |
| 563.5625 | 17.75 |
| 563.595  | 19.5  |
| 563.6313 | 19    |
| 563.6613 | 17.25 |
| 563.695  | 17.25 |
| 563.7275 | 16.25 |
| 563.7625 | 18.5  |
| 563.795  | 15.25 |
| 563.83   | 16    |
| 563.8613 | 20    |
| 563.895  | 17.5  |
| 563.9288 | 19    |
| 563.9613 | 17.75 |
| 563.9963 | 18.75 |
| 564.0313 | 18    |
| 564.0625 | 21.75 |
| 564.095  | 20.75 |
| 564.1313 | 18.75 |
| 564.1613 | 19.5  |
| 564.195  | 15.75 |
| 564.2275 | 18.5  |
| 564.2625 | 19.25 |
| 564.295  | 16.75 |
| 564.33   | 17.5  |
| 564.3613 | 19.25 |
| 564.395  | 18.5  |
| 564.4288 | 18.5  |
| 564.4613 | 20.5  |
| 564.4938 | 18.75 |
| 564.5313 | 17    |
| 564.5625 | 20.25 |
| 564.595  | 14.5  |
| 564.6313 | 20.75 |
| 564.6613 | 20    |
| 564.695  | 18.5  |
| 564.7275 | 21.5  |
| 564.7625 | 14.5  |
| 564.795  | 21.25 |
| 564.83   | 16.25 |
| 564.8613 | 20.25 |
| 564.895  | 18    |
| 564.9288 | 20    |
| 564.9613 | 17.75 |
| 564.9963 | 22.25 |
| 565.0338 | 19.75 |
| 565.0663 | 27.5  |
| 565.0975 | 20.25 |
| 565.1338 | 18.25 |

|          |       |
|----------|-------|
| 565.1613 | 8     |
| 565.1963 | 9.75  |
| 565.2288 | 12.75 |
| 565.2613 | 10.75 |
| 565.2925 | 9.75  |
| 565.325  | 9.25  |
| 565.3575 | 10    |
| 565.3925 | 10.5  |
| 565.4263 | 10    |
| 565.4588 | 10.5  |
| 565.495  | 10    |
| 565.5263 | 7.75  |
| 565.5613 | 10.5  |
| 565.5925 | 8.25  |
| 565.625  | 10.25 |
| 565.6613 | 10    |
| 565.6975 | 9.75  |
| 565.7288 | 8.75  |
| 565.7613 | 8.75  |
| 565.7925 | 7.75  |
| 565.825  | 8     |
| 565.8575 | 10.75 |
| 565.8925 | 8.25  |
| 565.9263 | 8.5   |
| 565.9588 | 10.5  |
| 565.995  | 8.5   |
| 566.0263 | 8.25  |
| 566.06   | 10.5  |
| 566.0925 | 9     |
| 566.125  | 11    |
| 566.16   | 10.75 |
| 566.1963 | 11.25 |
| 566.2313 | 11.75 |
| 566.2613 | 9.75  |
| 566.2925 | 10.5  |
| 566.325  | 9     |
| 566.3575 | 13    |
| 566.3925 | 9     |
| 566.4263 | 10.5  |
| 566.4588 | 8.5   |
| 566.495  | 10.25 |
| 566.5263 | 8.75  |
| 566.56   | 8.5   |
| 566.5925 | 8.5   |
| 566.6263 | 10.25 |
| 566.66   | 10.5  |
| 566.6963 | 9     |
| 566.7263 | 12.5  |
| 566.7613 | 10.75 |
| 566.7925 | 10.25 |

|          |       |
|----------|-------|
| 565.1638 | 22.5  |
| 565.1975 | 16.5  |
| 565.23   | 19.75 |
| 565.2613 | 18.75 |
| 565.2963 | 16.75 |
| 565.3325 | 19.25 |
| 565.3625 | 19.5  |
| 565.3963 | 18.5  |
| 565.43   | 22    |
| 565.4625 | 19.25 |
| 565.4963 | 21.25 |
| 565.5338 | 18.5  |
| 565.5663 | 16.25 |
| 565.5975 | 18.75 |
| 565.6338 | 16.75 |
| 565.6638 | 17.75 |
| 565.6975 | 20.5  |
| 565.73   | 14    |
| 565.7613 | 13.25 |
| 565.7963 | 17.25 |
| 565.8325 | 16    |
| 565.8638 | 16.25 |
| 565.8963 | 18.75 |
| 565.93   | 14.5  |
| 565.9625 | 13.5  |
| 565.9963 | 16.75 |
| 566.0338 | 15    |
| 566.0663 | 13.75 |
| 566.0975 | 15.75 |
| 566.1338 | 22.75 |
| 566.1638 | 16.5  |
| 566.1975 | 14.25 |
| 566.2275 | 14.5  |
| 566.2613 | 16.75 |
| 566.2963 | 17    |
| 566.3325 | 16.5  |
| 566.3638 | 19    |
| 566.3963 | 17.25 |
| 566.43   | 23.5  |
| 566.4625 | 18    |
| 566.4963 | 16.25 |
| 566.535  | 17    |
| 566.5663 | 17    |
| 566.5975 | 17.25 |
| 566.6338 | 17    |
| 566.6638 | 25.5  |
| 566.6975 | 16.75 |
| 566.7275 | 18.75 |
| 566.7613 | 18    |
| 566.7963 | 20.75 |

|          |       |          |       |
|----------|-------|----------|-------|
| 566.825  | 11.5  | 566.8325 | 17.75 |
| 566.8575 | 11    | 566.8638 | 19.5  |
| 566.8925 | 10    | 566.8963 | 15    |
| 566.9263 | 10    | 566.93   | 18.75 |
| 566.9588 | 8     | 566.9625 | 15    |
| 566.995  | 13    | 566.9963 | 19    |
| 567.0263 | 10    | 567.035  | 19.25 |
| 567.06   | 7     | 567.065  | 17.75 |
| 567.0925 | 8.5   | 567.0975 | 17.5  |
| 567.1263 | 11.75 | 567.1338 | 17    |
| 567.16   | 10.25 | 567.1638 | 16.25 |
| 567.1963 | 11.5  | 567.1975 | 15.25 |
| 567.2263 | 10.25 | 567.2275 | 16.75 |
| 567.2613 | 8.25  | 567.2638 | 19.75 |
| 567.2925 | 7.75  | 567.2988 | 13.75 |
| 567.325  | 8     | 567.335  | 9.75  |
| 567.3575 | 9.25  | 567.3663 | 16    |
| 567.3925 | 7.5   | 567.4    | 13.75 |
| 567.4288 | 11.75 | 567.4338 | 14.75 |
| 567.4588 | 10.75 | 567.465  | 16    |
| 567.495  | 13.75 | 567.4988 | 15.5  |
| 567.5263 | 12.75 | 567.5363 | 13.5  |
| 567.56   | 11.25 | 567.5663 | 13.5  |
| 567.5925 | 8     | 567.5988 | 14.75 |
| 567.6263 | 12.75 | 567.6338 | 10.75 |
| 567.66   | 13.75 | 567.6675 | 15.75 |
| 567.6963 | 12    | 567.6988 | 14.5  |
| 567.7288 | 12    | 567.7288 | 14    |
| 567.7588 | 14.5  | 567.7638 | 15.75 |
| 567.795  | 9.75  | 567.7988 | 14.25 |
| 567.825  | 8.5   | 567.835  | 15.5  |
| 567.8575 | 10.5  | 567.8663 | 15.75 |
| 567.8925 | 12    | 567.8975 | 15.5  |
| 567.9288 | 11.5  | 567.9338 | 18.5  |
| 567.9588 | 8.75  | 567.965  | 18    |
| 567.995  | 9.5   | 567.9988 | 16    |
| 568.0288 | 15    | 568.0363 | 17.75 |
| 568.06   | 11    | 568.0688 | 19    |
| 568.0925 | 14.25 | 568.1038 | 20    |
| 568.1263 | 12    | 568.1375 | 17.5  |
| 568.16   | 10    | 568.17   | 18.75 |
| 568.1963 | 12    | 568.2013 | 18.75 |
| 568.2263 | 10.5  | 568.2313 | 17    |
| 568.2588 | 12.5  | 568.2663 | 16.5  |
| 568.295  | 10.5  | 568.3013 | 17.5  |
| 568.325  | 16.75 | 568.3363 | 15.25 |
| 568.3575 | 9.75  | 568.3675 | 19    |
| 568.3975 | 11.5  | 568.4    | 19.5  |
| 568.4288 | 8.5   | 568.435  | 19    |
| 568.4588 | 8.75  | 568.4663 | 18.25 |

|          |       |          |       |
|----------|-------|----------|-------|
| 568.495  | 9.5   | 568.5    | 21.25 |
| 568.5263 | 10.5  | 568.535  | 21.5  |
| 568.56   | 8     | 568.5688 | 15.5  |
| 568.5925 | 8.75  | 568.6038 | 13.75 |
| 568.6263 | 8.5   | 568.6375 | 17.75 |
| 568.66   | 9.25  | 568.67   | 19    |
| 568.6963 | 9.5   | 568.7013 | 16.25 |
| 568.7263 | 8.5   | 568.7313 | 14.25 |
| 568.7588 | 9.25  | 568.7688 | 18.75 |
| 568.795  | 7.75  | 568.8013 | 17    |
| 568.825  | 11.25 | 568.8363 | 17    |
| 568.8575 | 9     | 568.8675 | 19.75 |
| 568.895  | 9.75  | 568.9    | 23    |
| 568.9288 | 11.25 | 568.9375 | 23.75 |
| 568.9588 | 9.25  | 568.9663 | 16.5  |
| 568.9925 | 11.75 | 569      | 19.75 |
| 569.0263 | 10    | 569.035  | 16.75 |
| 569.06   | 8.25  | 569.0688 | 20.75 |
| 569.0925 | 8.5   | 569.1038 | 16.25 |
| 569.1263 | 9.25  | 569.1375 | 16    |
| 569.16   | 8     | 569.17   | 20.75 |
| 569.1963 | 9.5   | 569.2013 | 15.75 |
| 569.2263 | 11.75 | 569.2313 | 18.25 |
| 569.2588 | 8     | 569.2688 | 17.75 |
| 569.295  | 10.75 | 569.3013 | 17.5  |
| 569.325  | 8     | 569.3363 | 20.75 |
| 569.3575 | 11.75 | 569.3675 | 18.25 |
| 569.395  | 10    | 569.4    | 19.25 |
| 569.4288 | 9     | 569.435  | 15    |
| 569.4588 | 9.25  | 569.4675 | 18.5  |
| 569.4925 | 11.75 | 569.5    | 19.5  |
| 569.5263 | 11    | 569.535  | 17.75 |
| 569.56   | 9.5   | 569.5688 | 15.25 |
| 569.5925 | 13.25 | 569.6038 | 16.5  |
| 569.6263 | 13    | 569.6375 | 22    |
| 569.66   | 10    | 569.67   | 16.5  |
| 569.6963 | 12.75 | 569.7013 | 19    |
| 569.7263 | 11.5  | 569.7313 | 17.25 |
| 569.7588 | 12.5  | 569.7688 | 18.5  |
| 569.795  | 9     | 569.8038 | 19    |
| 569.825  | 11.25 | 569.8363 | 22    |
| 569.8575 | 10.75 | 569.8675 | 20.75 |
| 569.895  | 16.25 | 569.9    | 16.25 |
| 569.9288 | 13.5  | 569.935  | 21.25 |
| 569.9588 | 13.5  | 569.9663 | 23.75 |
| 569.9925 | 12.5  | 570      | 21    |
| 570.025  | 11.25 | 570.035  | 23    |
| 570.06   | 13.25 | 570.0688 | 17.25 |
| 570.0925 | 11.25 | 570.1038 | 16    |
| 570.1263 | 9     | 570.1375 | 21.75 |

|          |       |
|----------|-------|
| 570.16   | 10.75 |
| 570.1963 | 10.75 |
| 570.2263 | 10.75 |
| 570.2588 | 10.5  |
| 570.295  | 10    |
| 570.325  | 13    |
| 570.36   | 9.75  |
| 570.395  | 10.25 |
| 570.4288 | 14.75 |
| 570.4588 | 12.5  |
| 570.4925 | 10.25 |
| 570.5263 | 12.75 |
| 570.56   | 14.25 |
| 570.5925 | 13    |
| 570.6275 | 12.5  |
| 570.6613 | 10.75 |
| 570.6963 | 14    |
| 570.7263 | 12.5  |
| 570.7575 | 12.5  |
| 570.795  | 11.75 |
| 570.825  | 10    |
| 570.86   | 10.5  |
| 570.895  | 12    |
| 570.9288 | 9     |
| 570.9588 | 10.25 |
| 570.9925 | 11    |
| 571.0263 | 15.25 |
| 571.06   | 11.75 |
| 571.0925 | 12.5  |
| 571.1275 | 12.25 |
| 571.1613 | 12.25 |
| 571.1963 | 10.25 |
| 571.2263 | 12.75 |
| 571.2575 | 9     |
| 571.295  | 12    |
| 571.325  | 10.5  |
| 571.36   | 11    |
| 571.395  | 11.25 |
| 571.4275 | 10.75 |
| 571.4588 | 10.75 |
| 571.4925 | 9.25  |
| 571.5263 | 12.5  |
| 571.56   | 8.5   |
| 571.5925 | 11.5  |
| 571.6275 | 9.75  |
| 571.6613 | 14.75 |
| 571.6963 | 13.5  |
| 571.7263 | 10    |
| 571.7575 | 8.5   |
| 571.795  | 13.25 |

|          |       |
|----------|-------|
| 570.17   | 15.75 |
| 570.2013 | 18.75 |
| 570.2313 | 14.75 |
| 570.2688 | 19.25 |
| 570.3013 | 17.75 |
| 570.3375 | 17    |
| 570.3675 | 17.75 |
| 570.4    | 15.5  |
| 570.435  | 18.25 |
| 570.4663 | 14.75 |
| 570.4988 | 18.5  |
| 570.535  | 19    |
| 570.5688 | 19    |
| 570.6038 | 18.75 |
| 570.6375 | 14.75 |
| 570.67   | 16    |
| 570.7013 | 14.25 |
| 570.7313 | 14.75 |
| 570.7688 | 14.75 |
| 570.8013 | 11.25 |
| 570.8375 | 12    |
| 570.8675 | 13.5  |
| 570.9    | 11.25 |
| 570.935  | 14    |
| 570.9663 | 15.75 |
| 570.9988 | 16    |
| 571.035  | 14.25 |
| 571.07   | 13.75 |
| 571.1038 | 12    |
| 571.1363 | 16    |
| 571.17   | 16.5  |
| 571.2013 | 19    |
| 571.2313 | 16.75 |
| 571.2675 | 15.5  |
| 571.3038 | 21.75 |
| 571.3375 | 19.25 |
| 571.3675 | 21.25 |
| 571.4    | 23    |
| 571.435  | 19.75 |
| 571.4663 | 16    |
| 571.5    | 19.25 |
| 571.535  | 19.75 |
| 571.57   | 18    |
| 571.6038 | 16.75 |
| 571.6363 | 14.25 |
| 571.67   | 18.75 |
| 571.7013 | 21.75 |
| 571.7313 | 15.5  |
| 571.7675 | 14.25 |
| 571.8013 | 18.5  |

|          |       |
|----------|-------|
| 571.825  | 12    |
| 571.86   | 8.5   |
| 571.895  | 10.75 |
| 571.9275 | 12.25 |
| 571.9588 | 11.5  |
| 571.9925 | 13.5  |
| 572.0263 | 12.75 |
| 572.06   | 12.25 |
| 572.0925 | 11.25 |
| 572.1263 | 15.25 |
| 572.1613 | 11.75 |
| 572.1963 | 12.75 |
| 572.2263 | 9.5   |
| 572.2575 | 12    |
| 572.2925 | 12    |
| 572.325  | 11.75 |
| 572.36   | 9.75  |
| 572.395  | 12.5  |
| 572.4275 | 10.25 |
| 572.4588 | 12.5  |
| 572.4925 | 11.25 |
| 572.5263 | 7.75  |
| 572.56   | 13.75 |
| 572.5925 | 11.5  |
| 572.6263 | 11.25 |
| 572.6613 | 12    |
| 572.6963 | 13    |
| 572.7263 | 14.5  |
| 572.7575 | 12.25 |
| 572.795  | 10.25 |
| 572.825  | 11.75 |
| 572.86   | 14.5  |
| 572.895  | 11.5  |
| 572.9275 | 14.5  |
| 572.9588 | 11.75 |
| 572.9925 | 10.25 |
| 573.0238 | 14.25 |
| 573.06   | 11    |
| 573.0925 | 10    |
| 573.1263 | 10    |
| 573.1613 | 11.75 |
| 573.1963 | 15.25 |
| 573.2263 | 10.75 |
| 573.2575 | 10.25 |
| 573.2925 | 11.5  |
| 573.325  | 9.5   |
| 573.36   | 12.5  |
| 573.3975 | 13    |
| 573.4275 | 14.5  |
| 573.4588 | 10    |

|          |       |
|----------|-------|
| 571.8375 | 18.5  |
| 571.8675 | 15.25 |
| 571.9    | 15.75 |
| 571.935  | 19.25 |
| 571.9663 | 20.5  |
| 572      | 19    |
| 572.035  | 18    |
| 572.07   | 17    |
| 572.1038 | 21    |
| 572.1363 | 22    |
| 572.17   | 22    |
| 572.2013 | 23.25 |
| 572.2313 | 19.75 |
| 572.2675 | 21    |
| 572.3013 | 20    |
| 572.3375 | 22.75 |
| 572.3675 | 20.75 |
| 572.4    | 18.75 |
| 572.435  | 20    |
| 572.4663 | 26    |
| 572.5    | 22.5  |
| 572.5363 | 21.25 |
| 572.5725 | 20    |
| 572.6038 | 20.25 |
| 572.6363 | 21.75 |
| 572.67   | 19.25 |
| 572.7013 | 21    |
| 572.7313 | 18.75 |
| 572.7675 | 20.75 |
| 572.8013 | 17.5  |
| 572.8375 | 18.25 |
| 572.8675 | 15    |
| 572.8975 | 17.75 |
| 572.935  | 21    |
| 572.9663 | 16.75 |
| 573      | 21.5  |
| 573.035  | 17.75 |
| 573.0725 | 15.5  |
| 573.1038 | 17.5  |
| 573.1363 | 18    |
| 573.17   | 16.75 |
| 573.2013 | 19.25 |
| 573.2313 | 16.25 |
| 573.2675 | 17    |
| 573.3038 | 19.5  |
| 573.34   | 16.5  |
| 573.37   | 20    |
| 573.4025 | 18.5  |
| 573.4363 | 18.5  |
| 573.4675 | 18    |



|          |       |
|----------|-------|
| 573.4925 | 13.25 |
| 573.5238 | 14    |
| 573.56   | 11    |
| 573.5925 | 12.25 |
| 573.6263 | 11.5  |
| 573.6613 | 9.5   |
| 573.6963 | 9.25  |
| 573.7263 | 10    |
| 573.76   | 9     |
| 573.7925 | 9.5   |
| 573.825  | 11.75 |
| 573.8625 | 9.25  |
| 573.8975 | 10.75 |
| 573.9275 | 10.25 |
| 573.9588 | 11.5  |
| 573.9925 | 9     |
| 574.0238 | 7.75  |
| 574.06   | 11    |
| 574.0925 | 11.25 |
| 574.1263 | 12.75 |
| 574.1613 | 12.25 |
| 574.1963 | 10.5  |
| 574.2263 | 12.25 |
| 574.26   | 11.25 |
| 574.2925 | 11.5  |
| 574.325  | 11.5  |
| 574.3625 | 12    |
| 574.3975 | 11    |
| 574.4275 | 9.5   |
| 574.4588 | 10.75 |
| 574.4925 | 8.75  |
| 574.5238 | 10.5  |
| 574.56   | 12.5  |
| 574.5925 | 12.25 |
| 574.6263 | 11.5  |
| 574.6613 | 9.5   |
| 574.6963 | 12    |
| 574.7263 | 12.75 |
| 574.76   | 13    |
| 574.7925 | 12.75 |
| 574.825  | 10.5  |
| 574.8625 | 11.75 |
| 574.8975 | 12.5  |
| 574.9275 | 10    |
| 574.9588 | 10.75 |
| 574.9925 | 9.75  |
| 575.0238 | 10.5  |
| 575.0588 | 11    |
| 575.0925 | 11.75 |
| 575.1263 | 12    |

|          |       |
|----------|-------|
| 573.5038 | 18    |
| 573.5363 | 20.5  |
| 573.5738 | 20.5  |
| 573.605  | 17.25 |
| 573.6375 | 19.25 |
| 573.6738 | 16    |
| 573.7038 | 20.5  |
| 573.7338 | 20.5  |
| 573.77   | 19    |
| 573.8038 | 22    |
| 573.84   | 14.75 |
| 573.87   | 18.75 |
| 573.9    | 19.75 |
| 573.9363 | 19.25 |
| 573.9675 | 20.5  |
| 574.0038 | 18.25 |
| 574.0363 | 15    |
| 574.0738 | 14    |
| 574.105  | 14.75 |
| 574.1375 | 20.25 |
| 574.1725 | 16.75 |
| 574.2038 | 16.75 |
| 574.2338 | 14    |
| 574.27   | 13.25 |
| 574.3038 | 16    |
| 574.34   | 14.75 |
| 574.37   | 15.25 |
| 574.4025 | 15.5  |
| 574.4363 | 20    |
| 574.4675 | 23    |
| 574.5038 | 16.5  |
| 574.5363 | 15.5  |
| 574.5738 | 17    |
| 574.6063 | 16    |
| 574.6375 | 17.5  |
| 574.6725 | 16.75 |
| 574.7038 | 15.25 |
| 574.7338 | 17    |
| 574.77   | 18    |
| 574.8063 | 12.75 |
| 574.84   | 13.75 |
| 574.87   | 17    |
| 574.9025 | 17.75 |
| 574.9388 | 20    |
| 574.9675 | 15    |
| 575.0038 | 14    |
| 575.0363 | 18.25 |
| 575.0738 | 18.5  |
| 575.105  | 19.5  |
| 575.1375 | 20.5  |

|          |       |
|----------|-------|
| 575.1613 | 12    |
| 575.1963 | 9.5   |
| 575.2263 | 11.75 |
| 575.26   | 10.5  |
| 575.2913 | 10.25 |
| 575.325  | 13.25 |
| 575.365  | 11.75 |
| 575.3975 | 10.5  |
| 575.4275 | 11    |
| 575.4588 | 12.25 |
| 575.4925 | 9.75  |
| 575.5238 | 11.25 |
| 575.5588 | 12.5  |
| 575.5938 | 9     |
| 575.63   | 12.25 |
| 575.6625 | 11    |
| 575.6975 | 10    |
| 575.7275 | 7.75  |
| 575.7613 | 12.25 |
| 575.7938 | 11    |
| 575.8275 | 11    |
| 575.865  | 9     |
| 575.9    | 7.25  |
| 575.93   | 10    |
| 575.9613 | 9.75  |
| 575.995  | 10    |
| 576.0263 | 8     |
| 576.06   | 10.75 |
| 576.095  | 8.5   |
| 576.1325 | 9     |
| 576.1625 | 7.5   |
| 576.1975 | 12    |
| 576.2275 | 7.5   |
| 576.2613 | 9     |
| 576.2938 | 10    |
| 576.3275 | 8.75  |
| 576.365  | 10    |
| 576.4    | 12.25 |
| 576.43   | 12.5  |
| 576.4613 | 14.75 |
| 576.4963 | 14.5  |
| 576.5263 | 12.5  |
| 576.56   | 15.25 |
| 576.595  | 12.25 |
| 576.6325 | 11.25 |
| 576.6625 | 9.75  |
| 576.6975 | 13.75 |
| 576.7275 | 14.25 |
| 576.7613 | 14    |
| 576.7938 | 10.25 |

|          |       |
|----------|-------|
| 575.1725 | 18    |
| 575.2038 | 21    |
| 575.2363 | 15.75 |
| 575.27   | 17.75 |
| 575.3063 | 21.75 |
| 575.34   | 16.5  |
| 575.37   | 17.5  |
| 575.4025 | 17.25 |
| 575.4363 | 21.25 |
| 575.4675 | 16.75 |
| 575.5013 | 22.25 |
| 575.5363 | 15.75 |
| 575.5738 | 19.75 |
| 575.605  | 19.25 |
| 575.6375 | 17.75 |
| 575.67   | 21.75 |
| 575.7038 | 20    |
| 575.7363 | 22.5  |
| 575.77   | 22    |
| 575.8088 | 22.5  |
| 575.84   | 24    |
| 575.87   | 20.75 |
| 575.9025 | 18.25 |
| 575.9363 | 19.25 |
| 575.9675 | 20.25 |
| 576.0013 | 22    |
| 576.0388 | 20.25 |
| 576.0738 | 16.5  |
| 576.105  | 18    |
| 576.1375 | 21.25 |
| 576.17   | 21.25 |
| 576.2038 | 20.5  |
| 576.2363 | 23    |
| 576.27   | 23.75 |
| 576.3088 | 23.5  |
| 576.34   | 22    |
| 576.37   | 24.5  |
| 576.4025 | 20.5  |
| 576.4363 | 18.5  |
| 576.4675 | 22    |
| 576.5013 | 22.75 |
| 576.5388 | 21.75 |
| 576.5738 | 23.75 |
| 576.605  | 19.5  |
| 576.6375 | 17.5  |
| 576.67   | 17.25 |
| 576.7038 | 23.5  |
| 576.7388 | 18.5  |
| 576.77   | 24.25 |
| 576.8088 | 25.5  |

|          |       |          |       |
|----------|-------|----------|-------|
| 576.8275 | 14.25 | 576.84   | 26.5  |
| 576.865  | 12.5  | 576.87   | 26.5  |
| 576.9    | 9.25  | 576.9025 | 24    |
| 576.93   | 10    | 576.9363 | 24.25 |
| 576.9613 | 8.75  | 576.9675 | 24.75 |
| 576.995  | 13.25 | 577.0013 | 25.5  |
| 577.0263 | 7.25  | 577.0388 | 26    |
| 577.06   | 8.75  | 577.0738 | 21.75 |
| 577.095  | 10.75 | 577.105  | 24.25 |
| 577.1325 | 8.25  | 577.1375 | 25.5  |
| 577.1625 | 10.5  | 577.17   | 22.75 |
| 577.1975 | 11    | 577.2038 | 21.25 |
| 577.2275 | 11.75 | 577.2363 | 20.5  |
| 577.2613 | 11.5  | 577.27   | 20.5  |
| 577.2938 | 9     | 577.3088 | 20    |
| 577.3275 | 12.5  | 577.34   | 19.25 |
| 577.365  | 10.75 | 577.37   | 15.5  |
| 577.4    | 11    | 577.4025 | 18.25 |
| 577.43   | 11.25 | 577.4363 | 18.25 |
| 577.4613 | 12.5  | 577.4675 | 16.5  |
| 577.4963 | 11.75 | 577.5013 | 17    |
| 577.5263 | 11.25 | 577.54   | 21    |
| 577.56   | 12.25 | 577.5738 | 17.25 |
| 577.595  | 15.5  | 577.605  | 21.5  |
| 577.6325 | 11    | 577.6375 | 16.5  |
| 577.6625 | 13.5  | 577.67   | 18    |
| 577.6975 | 11    | 577.7038 | 14.5  |
| 577.7275 | 10.5  | 577.7363 | 16    |
| 577.7613 | 10.25 | 577.77   | 18.5  |
| 577.7938 | 10.75 | 577.8088 | 15    |
| 577.825  | 10.5  | 577.84   | 17.5  |
| 577.865  | 12.25 | 577.87   | 16    |
| 577.9    | 9.75  | 577.9025 | 16.25 |
| 577.93   | 10.25 | 577.9363 | 16.75 |
| 577.9613 | 8     | 577.9675 | 18    |
| 577.9975 | 10.25 | 578.0013 | 19.25 |
| 578.0263 | 13.25 | 578.04   | 18.75 |
| 578.0575 | 12    | 578.0738 | 17.75 |
| 578.095  | 9.5   | 578.105  | 22    |
| 578.1325 | 9.5   | 578.1375 | 20.5  |
| 578.165  | 8.75  | 578.17   | 25.25 |
| 578.195  | 8     | 578.2038 | 24.5  |
| 578.2275 | 11    | 578.2363 | 20    |
| 578.2613 | 9.25  | 578.2725 | 18.75 |
| 578.2938 | 9.5   | 578.3088 | 22.25 |
| 578.325  | 11    | 578.34   | 27    |
| 578.365  | 11.75 | 578.37   | 18    |
| 578.4    | 11.75 | 578.4025 | 24.5  |
| 578.43   | 10.75 | 578.4363 | 21.25 |
| 578.4613 | 10.5  | 578.4675 | 22.75 |

|          |       |          |       |
|----------|-------|----------|-------|
| 578.4963 | 10.25 | 578.5013 | 24.5  |
| 578.5263 | 10.5  | 578.54   | 21.5  |
| 578.5575 | 9.75  | 578.5738 | 19    |
| 578.595  | 11    | 578.605  | 16.5  |
| 578.6325 | 13.5  | 578.6375 | 17.75 |
| 578.6625 | 11    | 578.67   | 18.5  |
| 578.695  | 11.75 | 578.7038 | 19.75 |
| 578.7275 | 10.75 | 578.7363 | 19    |
| 578.7613 | 11.75 | 578.7738 | 22.5  |
| 578.7938 | 12.25 | 578.8088 | 18.25 |
| 578.825  | 13.25 | 578.84   | 21    |
| 578.8663 | 12    | 578.8725 | 21.5  |
| 578.9    | 12.5  | 578.9025 | 18    |
| 578.93   | 11.5  | 578.9363 | 22.5  |
| 578.9613 | 13    | 578.9675 | 22.5  |
| 578.9963 | 14.5  | 579.0013 | 23.25 |
| 579.0263 | 14    | 579.0413 | 27    |
| 579.0575 | 14.5  | 579.0738 | 20.25 |
| 579.095  | 11.5  | 579.105  | 23.75 |
| 579.1325 | 14    | 579.1375 | 18    |
| 579.1625 | 11.5  | 579.17   | 18.75 |
| 579.195  | 10.75 | 579.2038 | 18.25 |
| 579.2275 | 11.5  | 579.2363 | 18.25 |
| 579.2613 | 14.5  | 579.2738 | 18.75 |
| 579.2938 | 11.5  | 579.3088 | 19.25 |
| 579.325  | 8.75  | 579.34   | 21.5  |
| 579.3663 | 10.25 | 579.37   | 18    |
| 579.4    | 13.25 | 579.4025 | 24.5  |
| 579.4313 | 8.5   | 579.4363 | 19.5  |
| 579.4613 | 11.5  | 579.47   | 21.5  |
| 579.4963 | 9.75  | 579.5013 | 19    |
| 579.5263 | 11.25 | 579.5413 | 22    |
| 579.5575 | 14.5  | 579.5738 | 24    |
| 579.595  | 12.25 | 579.605  | 23    |
| 579.6325 | 9     | 579.6375 | 25    |
| 579.6625 | 12.5  | 579.67   | 21.75 |
| 579.695  | 13.5  | 579.7038 | 21.75 |
| 579.7275 | 10.75 | 579.7363 | 22.5  |
| 579.7613 | 10.5  | 579.7763 | 24.25 |
| 579.7938 | 11.25 | 579.8088 | 23.75 |
| 579.825  | 10.25 | 579.84   | 25.75 |
| 579.8663 | 9.25  | 579.87   | 22.25 |
| 579.9    | 9.75  | 579.9025 | 17.25 |
| 579.93   | 9.75  | 579.9363 | 22    |
| 579.9613 | 9.25  | 579.9675 | 26.5  |
| 579.9963 | 10.25 | 580.0025 | 23    |
| 580.0263 | 10    | 580.0413 | 22    |
| 580.0575 | 9.25  | 580.0738 | 17.25 |
| 580.0925 | 11    | 580.105  | 19.25 |
| 580.1313 | 13.75 | 580.1375 | 16.75 |

|          |       |          |       |
|----------|-------|----------|-------|
| 580.1625 | 11.75 | 580.17   | 18.75 |
| 580.195  | 12    | 580.2038 | 18.75 |
| 580.2275 | 13.25 | 580.2363 | 19    |
| 580.2613 | 12    | 580.2763 | 16.75 |
| 580.2938 | 12.25 | 580.3088 | 24.5  |
| 580.3263 | 9.25  | 580.34   | 19.25 |
| 580.3688 | 12    | 580.37   | 20.25 |
| 580.4013 | 13.5  | 580.4025 | 21    |
| 580.4313 | 10    | 580.4363 | 23    |
| 580.4625 | 8     | 580.4675 | 19.5  |
| 580.4975 | 12    | 580.5025 | 22.5  |
| 580.5313 | 10    | 580.5413 | 20.25 |
| 580.5625 | 10.5  | 580.5738 | 27    |
| 580.5988 | 9.5   | 580.605  | 26    |
| 580.6338 | 8.75  | 580.6375 | 22.25 |
| 580.6663 | 9     | 580.67   | 23.5  |
| 580.6988 | 11    | 580.7038 | 21.5  |
| 580.7338 | 13.25 | 580.7363 | 26    |
| 580.765  | 10.5  | 580.7763 | 19    |
| 580.7963 | 12    | 580.8088 | 27    |
| 580.8275 | 10.75 | 580.84   | 25    |
| 580.8713 | 11.25 | 580.87   | 22    |
| 580.9038 | 12.75 | 580.9    | 28    |
| 580.9338 | 7     | 580.9363 | 25.5  |
| 580.9675 | 9.25  | 580.9675 | 22.75 |
| 581      | 11    | 581.0025 | 22.5  |
| 581.0313 | 10.25 | 581.0413 | 20.5  |
| 581.0625 | 10.5  | 581.0738 | 23.25 |
| 581.0988 | 9     | 581.105  | 22.25 |
| 581.1338 | 9     | 581.1375 | 21.25 |
| 581.1688 | 10    | 581.17   | 22.75 |
| 581.1988 | 10.25 | 581.2038 | 25.25 |
| 581.2363 | 8.5   | 581.2363 | 22.5  |
| 581.265  | 8.5   | 581.2763 | 21    |
| 581.2963 | 10.75 | 581.3088 | 24    |
| 581.33   | 12    | 581.34   | 20.75 |
| 581.3713 | 13    | 581.37   | 24.5  |
| 581.4038 | 10.75 | 581.4    | 16    |
| 581.4338 | 9.5   | 581.4363 | 23.25 |
| 581.4675 | 11    | 581.4675 | 25.75 |
| 581.5    | 8.75  | 581.5025 | 24    |
| 581.5313 | 10    | 581.5413 | 22    |
| 581.5625 | 11.25 | 581.5738 | 24    |
| 581.5988 | 10.25 | 581.605  | 23.25 |
| 581.6338 | 8.5   | 581.6375 | 20.25 |
| 581.6663 | 12.25 | 581.67   | 21.5  |
| 581.6988 | 9     | 581.7038 | 21    |
| 581.7338 | 13    | 581.7388 | 23.5  |
| 581.765  | 13.25 | 581.7763 | 26.75 |
| 581.7963 | 11.75 | 581.8088 | 19    |

|          |       |          |       |
|----------|-------|----------|-------|
| 581.83   | 12.5  | 581.84   | 20.75 |
| 581.8713 | 8.25  | 581.87   | 22.75 |
| 581.9038 | 9.5   | 581.9025 | 23    |
| 581.9338 | 9.75  | 581.9363 | 16.75 |
| 581.9663 | 14.75 | 581.9675 | 19.75 |
| 582      | 13.75 | 582.0063 | 18.75 |
| 582.0313 | 11.75 | 582.0413 | 25.75 |
| 582.0625 | 11    | 582.0738 | 20.75 |
| 582.0988 | 9     | 582.105  | 19.75 |
| 582.1338 | 12    | 582.1375 | 19.75 |
| 582.1663 | 10.5  | 582.17   | 20.25 |
| 582.1988 | 8.25  | 582.2038 | 24    |
| 582.2338 | 11.75 | 582.2388 | 23.5  |
| 582.2675 | 10.75 | 582.2763 | 20.75 |
| 582.2963 | 14    | 582.3088 | 23.25 |
| 582.3325 | 12    | 582.34   | 22.25 |
| 582.3713 | 9.25  | 582.37   | 21.5  |
| 582.4038 | 12    | 582.4    | 20.5  |
| 582.4338 | 10.5  | 582.4363 | 21    |
| 582.4663 | 8.75  | 582.47   | 21.25 |
| 582.5    | 9.25  | 582.5038 | 25.75 |
| 582.5313 | 12.5  | 582.5413 | 27.75 |
| 582.5625 | 8.25  | 582.5738 | 23.75 |
| 582.5988 | 9.75  | 582.605  | 17    |
| 582.6338 | 12.25 | 582.6375 | 20.5  |
| 582.6663 | 6.75  | 582.67   | 22.5  |
| 582.6988 | 8.5   | 582.7038 | 23.5  |
| 582.7338 | 9.25  | 582.7388 | 21.25 |
| 582.765  | 9.75  | 582.7763 | 19.75 |
| 582.7963 | 11.25 | 582.8088 | 20    |
| 582.83   | 9.5   | 582.84   | 18.5  |
| 582.87   | 12    | 582.87   | 18.25 |
| 582.9038 | 10    | 582.9    | 21    |
| 582.9338 | 10.25 | 582.9363 | 16.75 |
| 582.9663 | 10.5  | 582.9675 | 20.75 |
| 583      | 10    | 583.0038 | 15.75 |
| 583.0313 | 9.5   | 583.0413 | 22.25 |
| 583.0625 | 10.5  | 583.0738 | 19.75 |
| 583.0988 | 11    | 583.105  | 20    |
| 583.1338 | 10.5  | 583.1375 | 16.75 |
| 583.1663 | 10.5  | 583.17   | 18.75 |
| 583.1988 | 9.25  | 583.2063 | 19    |
| 583.2338 | 9.25  | 583.2388 | 18    |
| 583.265  | 8.25  | 583.2788 | 18.75 |
| 583.2963 | 9     | 583.3088 | 17    |
| 583.33   | 6.25  | 583.34   | 16.75 |
| 583.37   | 9.75  | 583.37   | 17.75 |
| 583.4038 | 8.75  | 583.4    | 21.5  |
| 583.4338 | 7.5   | 583.4363 | 19.25 |
| 583.4663 | 7.75  | 583.4688 | 17    |

|          |       |          |       |
|----------|-------|----------|-------|
| 583.5    | 9     | 583.5038 | 21.25 |
| 583.5313 | 8.25  | 583.5413 | 16.75 |
| 583.5625 | 10.75 | 583.5738 | 17.75 |
| 583.5988 | 12    | 583.605  | 23.25 |
| 583.6338 | 12    | 583.6375 | 17    |
| 583.6663 | 9.25  | 583.6725 | 19.5  |
| 583.6988 | 8.75  | 583.705  | 20.5  |
| 583.7338 | 7.25  | 583.74   | 20.5  |
| 583.765  | 9.75  | 583.78   | 14.5  |
| 583.7963 | 12    | 583.8113 | 20.75 |
| 583.83   | 10    | 583.8425 | 21.25 |
| 583.87   | 10    | 583.8725 | 17.5  |
| 583.9038 | 10    | 583.9025 | 17.5  |
| 583.9338 | 9.5   | 583.9388 | 20.75 |
| 583.9663 | 9.25  | 583.9713 | 19    |
| 584      | 8.25  | 584.0063 | 16.5  |
| 584.0313 | 7.5   | 584.045  | 17.5  |
| 584.0625 | 7.5   | 584.075  | 16.25 |
| 584.0988 | 10    | 584.1063 | 14    |
| 584.1363 | 11.25 | 584.1388 | 17.25 |
| 584.1663 | 8.75  | 584.1738 | 14.5  |
| 584.1988 | 7     | 584.205  | 17    |
| 584.2338 | 9.5   | 584.2425 | 14.75 |
| 584.265  | 6.5   | 584.28   | 12.5  |
| 584.2963 | 9.75  | 584.3113 | 17.25 |
| 584.33   | 7.75  | 584.3425 | 11.5  |
| 584.37   | 5.75  | 584.3725 | 16.75 |
| 584.4038 | 8.5   | 584.4025 | 14.5  |
| 584.4338 | 13.25 | 584.4388 | 17.5  |
| 584.4663 | 12.25 | 584.4713 | 20    |
| 584.5    | 12    | 584.5113 | 18.5  |
| 584.5313 | 7     | 584.5438 | 17.5  |
| 584.5625 | 9.5   | 584.575  | 17.25 |
| 584.5988 | 7     | 584.6063 | 19.5  |
| 584.6338 | 7.75  | 584.6388 | 22.25 |
| 584.6663 | 10    | 584.6725 | 16    |
| 584.7013 | 8.25  | 584.7075 | 14    |
| 584.7338 | 7.5   | 584.7425 | 19.5  |
| 584.765  | 8.75  | 584.78   | 17.5  |
| 584.7963 | 11.5  | 584.8113 | 17.75 |
| 584.83   | 6.75  | 584.8425 | 15.25 |
| 584.87   | 9.75  | 584.8725 | 17    |
| 584.9038 | 7.25  | 584.9025 | 20    |
| 584.9338 | 10.25 | 584.9388 | 17.25 |
| 584.9663 | 10.75 | 584.9713 | 17.75 |
| 585      | 7     | 585.0113 | 21.25 |
| 585.0313 | 6.5   | 585.0438 | 14    |
| 585.0638 | 9     | 585.075  | 19.75 |
| 585.0988 | 9.25  | 585.1063 | 19.75 |
| 585.1338 | 11    | 585.1388 | 23    |

|          |       |          |       |
|----------|-------|----------|-------|
| 585.1663 | 7.25  | 585.1725 | 17.5  |
| 585.2013 | 6.5   | 585.2075 | 20.25 |
| 585.2338 | 9     | 585.2425 | 20    |
| 585.265  | 9.25  | 585.28   | 18.75 |
| 585.2963 | 9.5   | 585.3113 | 19.75 |
| 585.33   | 8.5   | 585.3425 | 23.5  |
| 585.37   | 10    | 585.3725 | 21.5  |
| 585.4038 | 12.25 | 585.405  | 21    |
| 585.435  | 10.25 | 585.4388 | 23.75 |
| 585.4663 | 12.75 | 585.4738 | 17.5  |
| 585.5    | 10    | 585.5113 | 23.25 |
| 585.5313 | 11.75 | 585.5438 | 19.75 |
| 585.5638 | 8.25  | 585.575  | 20.75 |
| 585.5988 | 10    | 585.6063 | 21    |
| 585.6338 | 11    | 585.6388 | 20.25 |
| 585.6663 | 11.5  | 585.6738 | 23.25 |
| 585.7013 | 10.75 | 585.7075 | 18.25 |
| 585.7338 | 10.5  | 585.7425 | 16    |
| 585.765  | 11.75 | 585.78   | 17    |
| 585.7963 | 12.25 | 585.8113 | 19.25 |
| 585.83   | 10    | 585.8425 | 19.25 |
| 585.87   | 11.25 | 585.8725 | 21.25 |
| 585.9038 | 9     | 585.905  | 20.25 |
| 585.9338 | 11.75 | 585.9388 | 18.75 |
| 585.9663 | 10.5  | 585.9738 | 18.25 |
| 586      | 10.25 | 586.0113 | 22    |
| 586.0313 | 11    | 586.0438 | 20.75 |
| 586.0638 | 10.5  | 586.075  | 24.5  |
| 586.0988 | 11    | 586.1063 | 20    |
| 586.135  | 10.75 | 586.1388 | 20.5  |
| 586.1675 | 7.75  | 586.1725 | 18.25 |
| 586.2025 | 8     | 586.2075 | 21.75 |
| 586.2363 | 14.75 | 586.2425 | 21.25 |
| 586.2675 | 10.5  | 586.2813 | 20    |
| 586.2988 | 10.75 | 586.3113 | 19    |
| 586.3325 | 6.75  | 586.3425 | 15.75 |
| 586.3738 | 9.25  | 586.3725 | 22.75 |
| 586.4063 | 7.75  | 586.405  | 20.5  |
| 586.4363 | 11.5  | 586.44   | 16.5  |
| 586.4688 | 8.25  | 586.4738 | 17.5  |
| 586.5013 | 9.25  | 586.5113 | 18.5  |
| 586.5325 | 8.5   | 586.5438 | 20.5  |
| 586.565  | 10.25 | 586.575  | 18.5  |
| 586.6013 | 12.5  | 586.6063 | 15.75 |
| 586.635  | 11.5  | 586.6388 | 16    |
| 586.6675 | 10.25 | 586.6725 | 15.75 |
| 586.7025 | 13.5  | 586.7075 | 13.75 |
| 586.7363 | 14.25 | 586.7425 | 16.5  |
| 586.7675 | 10.5  | 586.78   | 16.75 |
| 586.7988 | 9.25  | 586.8113 | 17.25 |



|          |       |
|----------|-------|
| 586.8325 | 10    |
| 586.8738 | 11.5  |
| 586.9063 | 12.5  |
| 586.9363 | 11.5  |
| 586.9688 | 14.5  |
| 587.0013 | 9     |
| 587.0325 | 15.75 |
| 587.065  | 10    |
| 587.1013 | 8.5   |
| 587.135  | 9     |
| 587.1675 | 10    |
| 587.2025 | 9.25  |
| 587.2363 | 13.75 |
| 587.2675 | 8.25  |
| 587.2988 | 12    |
| 587.3325 | 11.75 |
| 587.3713 | 10.25 |
| 587.4063 | 10.75 |
| 587.4375 | 11.5  |
| 587.4688 | 15.75 |
| 587.5013 | 11.5  |
| 587.5325 | 10.25 |
| 587.565  | 13    |
| 587.6013 | 10.5  |
| 587.635  | 11.75 |
| 587.6675 | 9     |
| 587.7025 | 13.5  |
| 587.7363 | 8.5   |
| 587.7675 | 12    |
| 587.7988 | 9.25  |
| 587.8325 | 9.75  |
| 587.8713 | 8.75  |
| 587.9063 | 11.25 |
| 587.9375 | 12.25 |
| 587.9688 | 12    |
| 588.0013 | 11.75 |
| 588.0325 | 12.75 |
| 588.065  | 10.25 |
| 588.1038 | 12.25 |
| 588.135  | 10.25 |
| 588.1675 | 13.25 |
| 588.2025 | 11.25 |
| 588.2363 | 8.75  |
| 588.2675 | 11.75 |
| 588.3013 | 10.25 |
| 588.3325 | 10.25 |
| 588.3713 | 11.75 |
| 588.4063 | 12.25 |
| 588.4375 | 14    |
| 588.4688 | 11.75 |

|          |       |
|----------|-------|
| 586.8425 | 21    |
| 586.8725 | 18    |
| 586.905  | 14.75 |
| 586.94   | 11.25 |
| 586.975  | 19.75 |
| 587.0113 | 17.25 |
| 587.045  | 17.25 |
| 587.075  | 14.25 |
| 587.1063 | 16.25 |
| 587.1388 | 17    |
| 587.1725 | 13.5  |
| 587.2075 | 12.75 |
| 587.2425 | 13.25 |
| 587.28   | 12.25 |
| 587.3113 | 14    |
| 587.3425 | 12.5  |
| 587.3725 | 12    |
| 587.405  | 13    |
| 587.44   | 16.75 |
| 587.475  | 12    |
| 587.5113 | 14.75 |
| 587.5438 | 13.25 |
| 587.575  | 13.25 |
| 587.6063 | 14.5  |
| 587.6388 | 12.25 |
| 587.6725 | 13.25 |
| 587.7075 | 14.5  |
| 587.7425 | 13    |
| 587.78   | 11.25 |
| 587.8113 | 11.75 |
| 587.8425 | 11    |
| 587.8725 | 13    |
| 587.905  | 14    |
| 587.9375 | 16.25 |
| 587.975  | 16.25 |
| 588.0113 | 16.5  |
| 588.0438 | 13.5  |
| 588.075  | 14    |
| 588.1063 | 13.75 |
| 588.1413 | 12.5  |
| 588.175  | 14.75 |
| 588.2075 | 9.75  |
| 588.2425 | 11    |
| 588.28   | 12    |
| 588.3113 | 12    |
| 588.345  | 11    |
| 588.3725 | 11.25 |
| 588.405  | 14.25 |
| 588.4375 | 13.25 |
| 588.4763 | 12.5  |

|          |       |
|----------|-------|
| 588.5013 | 12.75 |
| 588.5325 | 14.25 |
| 588.565  | 16.75 |
| 588.6013 | 15    |
| 588.635  | 18.5  |
| 588.6675 | 17    |
| 588.7025 | 17.75 |
| 588.7363 | 15.75 |
| 588.7675 | 14.25 |
| 588.8013 | 14.25 |
| 588.8325 | 14    |
| 588.8713 | 12.5  |
| 588.9063 | 14.5  |
| 588.9375 | 13    |
| 588.9688 | 13    |
| 589.0013 | 11.5  |
| 589.0325 | 13.75 |
| 589.065  | 16.5  |
| 589.1013 | 14.5  |
| 589.135  | 12    |
| 589.17   | 12.5  |
| 589.2025 | 10    |
| 589.2363 | 14.75 |
| 589.2675 | 14.5  |
| 589.3013 | 15.5  |
| 589.3325 | 13.25 |
| 589.3713 | 13.25 |
| 589.4063 | 12    |
| 589.4375 | 15    |
| 589.4688 | 15.75 |
| 589.5013 | 18    |
| 589.5325 | 13    |
| 589.565  | 13.5  |
| 589.6013 | 15    |
| 589.635  | 16.5  |
| 589.67   | 13.5  |
| 589.705  | 10.25 |
| 589.7363 | 18.25 |
| 589.7675 | 15.25 |
| 589.8013 | 11    |
| 589.8325 | 10.5  |
| 589.8713 | 9.5   |
| 589.9063 | 12    |
| 589.9375 | 13    |
| 589.9688 | 14    |
| 590.0013 | 11.25 |
| 590.0325 | 11.75 |
| 590.065  | 8.5   |
| 590.1013 | 12.25 |
| 590.135  | 8.75  |

|          |       |
|----------|-------|
| 588.5113 | 12    |
| 588.5438 | 12    |
| 588.575  | 12    |
| 588.6063 | 12.5  |
| 588.6413 | 10    |
| 588.675  | 13    |
| 588.7075 | 11.25 |
| 588.7425 | 13    |
| 588.78   | 13    |
| 588.8113 | 14.75 |
| 588.8425 | 16.75 |
| 588.8725 | 14.5  |
| 588.905  | 16.75 |
| 588.94   | 16.25 |
| 588.9775 | 13.25 |
| 589.0138 | 12.75 |
| 589.0463 | 16    |
| 589.0775 | 15.25 |
| 589.1088 | 12.75 |
| 589.1438 | 12    |
| 589.1763 | 12    |
| 589.2088 | 12    |
| 589.2463 | 15.25 |
| 589.2813 | 13.25 |
| 589.3125 | 13.25 |
| 589.3438 | 12    |
| 589.3738 | 16.5  |
| 589.4075 | 14    |
| 589.44   | 13.25 |
| 589.4788 | 16    |
| 589.5138 | 9.5   |
| 589.5463 | 13.5  |
| 589.5775 | 14.25 |
| 589.6088 | 11.25 |
| 589.6438 | 12.25 |
| 589.6763 | 14.75 |
| 589.7088 | 11    |
| 589.7475 | 12.75 |
| 589.7813 | 16.25 |
| 589.8125 | 16.5  |
| 589.8438 | 14.25 |
| 589.875  | 12.75 |
| 589.9075 | 14.5  |
| 589.94   | 14    |
| 589.9788 | 13.25 |
| 590.0138 | 15    |
| 590.0463 | 15.25 |
| 590.0775 | 13.75 |
| 590.1088 | 14.75 |
| 590.1438 | 12.75 |

|          |       |          |       |
|----------|-------|----------|-------|
| 590.17   | 8.25  | 590.1763 | 10.75 |
| 590.2025 | 11.5  | 590.2088 | 11.75 |
| 590.2338 | 11.5  | 590.2475 | 11.75 |
| 590.2675 | 11    | 590.2813 | 11.25 |
| 590.3013 | 8.25  | 590.3125 | 10.25 |
| 590.3325 | 9     | 590.3438 | 10.5  |
| 590.3713 | 13.5  | 590.375  | 13.25 |
| 590.4063 | 12.5  | 590.4075 | 11.25 |
| 590.4375 | 11.5  | 590.44   | 13.25 |
| 590.4688 | 7.75  | 590.4788 | 14.5  |
| 590.5013 | 8     | 590.5138 | 9.75  |
| 590.5325 | 11.5  | 590.5463 | 12.75 |
| 590.5675 | 7.5   | 590.5775 | 14    |
| 590.6013 | 9.5   | 590.6088 | 14.25 |
| 590.635  | 10.75 | 590.6438 | 12.75 |
| 590.67   | 11    | 590.6763 | 14.5  |
| 590.7025 | 6.5   | 590.7113 | 13.75 |
| 590.7338 | 12    | 590.7475 | 15.25 |
| 590.7675 | 7.75  | 590.7813 | 12.5  |
| 590.8013 | 10.5  | 590.8125 | 13.5  |
| 590.8325 | 10    | 590.8438 | 12.75 |
| 590.8713 | 9.75  | 590.8775 | 12.5  |
| 590.9075 | 9.25  | 590.91   | 13.5  |
| 590.9388 | 8.25  | 590.94   | 17.5  |
| 590.9688 | 6.75  | 590.9788 | 13.75 |
| 591.0013 | 8.25  | 591.0138 | 10.75 |
| 591.0338 | 8.25  | 591.0463 | 13.75 |
| 591.065  | 7.25  | 591.0775 | 12.75 |
| 591.1013 | 8.25  | 591.1088 | 15.5  |
| 591.135  | 9     | 591.1438 | 17    |
| 591.17   | 9.75  | 591.1788 | 12.75 |
| 591.2025 | 7.75  | 591.21   | 13    |
| 591.2338 | 5.5   | 591.2475 | 13    |
| 591.27   | 8.5   | 591.2813 | 18.25 |
| 591.3013 | 7.25  | 591.3125 | 16.75 |
| 591.3313 | 7.75  | 591.3438 | 16.5  |
| 591.3713 | 7.75  | 591.375  | 16.25 |
| 591.405  | 8.25  | 591.41   | 17    |
| 591.4375 | 8     | 591.44   | 16    |
| 591.4688 | 9.5   | 591.4788 | 15.5  |
| 591.5013 | 9     | 591.5138 | 16.25 |
| 591.5338 | 6     | 591.5463 | 14.5  |
| 591.565  | 5     | 591.5775 | 15.5  |
| 591.6013 | 6.5   | 591.6113 | 12.5  |
| 591.635  | 6.25  | 591.6438 | 12.75 |
| 591.67   | 5.75  | 591.6763 | 13.5  |
| 591.7025 | 10.75 | 591.71   | 15.75 |
| 591.7338 | 7.5   | 591.7475 | 13.5  |
| 591.7675 | 11.5  | 591.7788 | 20.25 |
| 591.8013 | 10.75 | 591.8125 | 14.25 |

|          |       |          |       |
|----------|-------|----------|-------|
| 591.8313 | 7.25  | 591.8438 | 17.75 |
| 591.8713 | 7.25  | 591.875  | 15.75 |
| 591.905  | 8     | 591.91   | 17    |
| 591.9375 | 9.75  | 591.94   | 16.25 |
| 591.9688 | 8.5   | 591.9788 | 18.75 |
| 592.0013 | 9.25  | 592.0138 | 14.25 |
| 592.0338 | 7.5   | 592.0463 | 17    |
| 592.065  | 9.75  | 592.0775 | 20    |
| 592.1013 | 9.25  | 592.1113 | 15.75 |
| 592.135  | 12    | 592.1438 | 16.5  |
| 592.17   | 9.25  | 592.1763 | 16.5  |
| 592.2025 | 6.75  | 592.2125 | 17    |
| 592.235  | 9.75  | 592.2475 | 17.5  |
| 592.2675 | 9.5   | 592.2788 | 13.75 |
| 592.3013 | 9.25  | 592.3125 | 14.25 |
| 592.3313 | 13.25 | 592.3438 | 16.5  |
| 592.3713 | 6.75  | 592.375  | 14.25 |
| 592.405  | 11.5  | 592.41   | 19    |
| 592.4375 | 11    | 592.44   | 12.75 |
| 592.4688 | 10.25 | 592.4788 | 15    |
| 592.5013 | 8.75  | 592.5138 | 14.25 |
| 592.5338 | 8.25  | 592.5463 | 14    |
| 592.5675 | 9.25  | 592.5775 | 18.25 |
| 592.6013 | 11.25 | 592.6113 | 13    |
| 592.6375 | 7.5   | 592.6438 | 13.75 |
| 592.67   | 10.5  | 592.6763 | 19.25 |
| 592.7025 | 10    | 592.7125 | 19.25 |
| 592.7338 | 9.75  | 592.7475 | 15.25 |
| 592.7675 | 10    | 592.7788 | 15    |
| 592.8013 | 12.5  | 592.8125 | 19.25 |
| 592.8313 | 9     | 592.8438 | 20.5  |
| 592.8713 | 10.5  | 592.875  | 18.75 |
| 592.905  | 11    | 592.91   | 19.25 |
| 592.9375 | 10.75 | 592.94   | 16    |
| 592.9688 | 10.75 | 592.9788 | 18.75 |
| 593.0013 | 9.75  | 593.0138 | 14.75 |
| 593.0363 | 9.5   | 593.0463 | 15.5  |
| 593.065  | 12    | 593.0775 | 19.75 |
| 593.1013 | 10.25 | 593.1113 | 15.75 |
| 593.1375 | 10.5  | 593.1438 | 14.5  |
| 593.17   | 8.75  | 593.1763 | 12.25 |
| 593.2025 | 9.25  | 593.2125 | 13.5  |
| 593.2338 | 12.5  | 593.2475 | 19.25 |
| 593.27   | 11.75 | 593.2788 | 16    |
| 593.3013 | 8.75  | 593.3138 | 17.5  |
| 593.3313 | 10    | 593.3438 | 16.75 |
| 593.3713 | 8     | 593.375  | 14    |
| 593.405  | 10.5  | 593.41   | 14.75 |
| 593.4375 | 8.75  | 593.44   | 13.75 |
| 593.4688 | 11.25 | 593.4788 | 16.25 |

|          |       |          |       |
|----------|-------|----------|-------|
| 593.5013 | 11.5  | 593.5138 | 20.25 |
| 593.5338 | 8.25  | 593.5463 | 21.75 |
| 593.565  | 10.25 | 593.5775 | 17    |
| 593.6013 | 9.5   | 593.6113 | 16.75 |
| 593.6388 | 9.75  | 593.6438 | 17.75 |
| 593.67   | 10.25 | 593.6763 | 16    |
| 593.7025 | 7.5   | 593.7125 | 18    |
| 593.7338 | 10.25 | 593.7475 | 15    |
| 593.77   | 9.25  | 593.7788 | 15.5  |
| 593.8013 | 8.5   | 593.8125 | 19.75 |
| 593.8313 | 10.75 | 593.845  | 17.75 |
| 593.8713 | 11.5  | 593.875  | 13.75 |
| 593.905  | 11.25 | 593.91   | 16.5  |
| 593.9375 | 7.75  | 593.94   | 18    |
| 593.9688 | 7.5   | 593.9763 | 15.75 |
| 594.0013 | 7.25  | 594.0138 | 15.25 |
| 594.0338 | 12    | 594.0463 | 12.75 |
| 594.065  | 11    | 594.0775 | 15.25 |
| 594.1013 | 8.5   | 594.1113 | 17.75 |
| 594.1375 | 11.25 | 594.145  | 14.25 |
| 594.17   | 10.25 | 594.1763 | 17.75 |
| 594.2025 | 9.75  | 594.2125 | 12.5  |
| 594.2338 | 9.5   | 594.2475 | 17.25 |
| 594.27   | 10.75 | 594.2788 | 16.25 |
| 594.3013 | 8.5   | 594.3125 | 15.75 |
| 594.3338 | 13    | 594.345  | 17.75 |
| 594.3725 | 11    | 594.3775 | 15.5  |
| 594.405  | 11.25 | 594.41   | 16.25 |
| 594.4375 | 11.5  | 594.44   | 17.75 |
| 594.4688 | 9.75  | 594.4763 | 16.25 |
| 594.5013 | 12    | 594.5138 | 18.75 |
| 594.5338 | 12.25 | 594.545  | 19.5  |
| 594.565  | 12.25 | 594.5775 | 15.25 |
| 594.6013 | 12    | 594.6113 | 15    |
| 594.6375 | 5.75  | 594.645  | 15    |
| 594.67   | 11.5  | 594.6763 | 19    |
| 594.7025 | 10.5  | 594.7125 | 15.25 |
| 594.7338 | 10    | 594.7475 | 17.25 |
| 594.77   | 8.25  | 594.7788 | 18    |
| 594.8013 | 12.25 | 594.8125 | 17    |
| 594.8338 | 10.75 | 594.845  | 19.25 |
| 594.8725 | 10.25 | 594.875  | 17.25 |
| 594.905  | 10.75 | 594.91   | 11.25 |
| 594.9375 | 10.5  | 594.9413 | 16.75 |
| 594.9688 | 14.5  | 594.9763 | 13.75 |
| 595.0013 | 12.25 | 595.0138 | 19.25 |
| 595.0338 | 13.75 | 595.045  | 13.75 |
| 595.065  | 12.5  | 595.0775 | 15.75 |
| 595.1013 | 12.5  | 595.1113 | 17.25 |
| 595.1375 | 12.25 | 595.145  | 15.75 |

|          |       |          |       |
|----------|-------|----------|-------|
| 595.17   | 14.25 | 595.1763 | 12.5  |
| 595.205  | 13    | 595.2125 | 17.25 |
| 595.2338 | 11.75 | 595.2475 | 14    |
| 595.27   | 13.25 | 595.2788 | 14.5  |
| 595.3013 | 8.5   | 595.3125 | 14.5  |
| 595.3338 | 9.25  | 595.345  | 15.75 |
| 595.3725 | 10.75 | 595.375  | 16.5  |
| 595.405  | 11.25 | 595.41   | 15    |
| 595.4375 | 8.75  | 595.4413 | 17    |
| 595.4688 | 7.5   | 595.4763 | 18    |
| 595.5038 | 8.75  | 595.5138 | 14.75 |
| 595.5338 | 9.25  | 595.545  | 14    |
| 595.565  | 6.75  | 595.58   | 15.5  |
| 595.6038 | 9.5   | 595.6113 | 17.5  |
| 595.6375 | 9.75  | 595.645  | 17.75 |
| 595.67   | 10    | 595.6763 | 15.25 |
| 595.7025 | 5.75  | 595.7125 | 14.75 |
| 595.7338 | 9.75  | 595.7475 | 15.5  |
| 595.77   | 7     | 595.7788 | 16.5  |
| 595.8013 | 8.25  | 595.8125 | 17.25 |
| 595.8338 | 11.25 | 595.845  | 14.5  |
| 595.87   | 7.25  | 595.875  | 14.75 |
| 595.905  | 11.25 | 595.91   | 15.75 |
| 595.9375 | 10.5  | 595.9413 | 11.75 |
| 595.9688 | 11.25 | 595.9763 | 16.25 |
| 596.0013 | 11.25 | 596.0138 | 13.25 |
| 596.0338 | 11    | 596.045  | 10.5  |
| 596.065  | 12    | 596.0813 | 14.25 |
| 596.1038 | 13.5  | 596.1113 | 13.5  |
| 596.1375 | 14.5  | 596.145  | 14.25 |
| 596.17   | 13.25 | 596.1763 | 17.5  |
| 596.2025 | 11    | 596.2125 | 15.75 |
| 596.2338 | 11.5  | 596.2475 | 15.5  |
| 596.27   | 11.5  | 596.2788 | 16.75 |
| 596.3013 | 12.25 | 596.31   | 15    |
| 596.3338 | 13    | 596.345  | 12.75 |
| 596.37   | 13.5  | 596.375  | 14.75 |
| 596.405  | 11    | 596.41   | 15.25 |
| 596.4375 | 13.75 | 596.4413 | 13.25 |
| 596.4688 | 15.25 | 596.4763 | 11.75 |
| 596.5013 | 11.75 | 596.5138 | 15.25 |
| 596.5338 | 13    | 596.545  | 12.75 |
| 596.565  | 13    | 596.58   | 15.25 |
| 596.6038 | 13.5  | 596.6113 | 15    |
| 596.6375 | 14.5  | 596.645  | 12    |
| 596.6688 | 12.75 | 596.6788 | 13.25 |
| 596.7025 | 11.5  | 596.7125 | 12.75 |
| 596.7338 | 16    | 596.7475 | 11.75 |
| 596.77   | 12.75 | 596.7788 | 11    |
| 596.8013 | 14.75 | 596.81   | 12.25 |

|          |       |          |       |
|----------|-------|----------|-------|
| 596.8338 | 14.25 | 596.845  | 16.5  |
| 596.87   | 16.25 | 596.875  | 15.75 |
| 596.905  | 15.75 | 596.9113 | 16.75 |
| 596.9375 | 15    | 596.9413 | 12.25 |
| 596.9688 | 13.75 | 596.9763 | 17.5  |
| 597.0013 | 14.5  | 597.0138 | 15.25 |
| 597.0338 | 11.25 | 597.045  | 14.25 |
| 597.065  | 13.75 | 597.08   | 14    |
| 597.1038 | 11.5  | 597.1113 | 16    |
| 597.1375 | 11.5  | 597.145  | 13    |
| 597.1688 | 12.25 | 597.1788 | 14.75 |
| 597.2025 | 13.5  | 597.2125 | 16.5  |
| 597.2338 | 14.75 | 597.2475 | 15.75 |
| 597.27   | 13.5  | 597.2788 | 17.25 |
| 597.3013 | 11.75 | 597.3113 | 16    |
| 597.3363 | 8.75  | 597.345  | 17.25 |
| 597.37   | 12.25 | 597.375  | 18    |
| 597.405  | 10.25 | 597.41   | 15.75 |
| 597.4375 | 13.25 | 597.4413 | 18.5  |
| 597.4688 | 11.25 | 597.4763 | 14.75 |
| 597.5013 | 9.5   | 597.5138 | 15.25 |
| 597.5338 | 13.5  | 597.545  | 15.75 |
| 597.565  | 11.25 | 597.58   | 15.5  |
| 597.6038 | 11.25 | 597.6113 | 16.75 |
| 597.6375 | 11.5  | 597.645  | 19.75 |
| 597.67   | 11.75 | 597.6788 | 18.75 |
| 597.7025 | 13.75 | 597.7125 | 13.5  |
| 597.735  | 14.5  | 597.7475 | 14    |
| 597.77   | 9     | 597.7813 | 16    |
| 597.8013 | 11.75 | 597.8113 | 15.25 |
| 597.8363 | 14    | 597.845  | 14.25 |
| 597.87   | 12    | 597.875  | 16    |
| 597.905  | 12    | 597.91   | 11.5  |
| 597.9375 | 11.25 | 597.9413 | 14    |
| 597.9688 | 12.25 | 597.9763 | 13.75 |
| 598.0013 | 12    | 598.0138 | 11    |
| 598.0338 | 14    | 598.045  | 13.25 |
| 598.065  | 13.5  | 598.0788 | 11    |
| 598.1013 | 11    | 598.1113 | 9.5   |
| 598.1375 | 12.75 | 598.145  | 13.25 |
| 598.1688 | 10    | 598.1788 | 11    |
| 598.2025 | 14.5  | 598.2125 | 13.75 |
| 598.2363 | 10.5  | 598.2475 | 13.5  |
| 598.27   | 10.75 | 598.2788 | 17.75 |
| 598.3013 | 14.75 | 598.3113 | 15.5  |
| 598.3363 | 10.5  | 598.345  | 13.75 |
| 598.37   | 14.25 | 598.375  | 15    |
| 598.405  | 14.5  | 598.41   | 16    |
| 598.4375 | 20.75 | 598.4413 | 16    |
| 598.4688 | 10.75 | 598.4763 | 16.25 |

|          |       |
|----------|-------|
| 598.5013 | 17.25 |
| 598.5338 | 12.25 |
| 598.565  | 12    |
| 598.6013 | 11.25 |
| 598.6375 | 13    |
| 598.6688 | 12    |
| 598.7025 | 15    |
| 598.735  | 12.5  |
| 598.77   | 13.75 |
| 598.8013 | 12.25 |
| 598.8363 | 24.75 |
| 598.87   | 12    |
| 598.905  | 32.75 |
| 598.9375 | 15.25 |
| 598.9713 | 28.5  |
| 599.0013 | 22.5  |
| 599.0338 | 22.75 |
| 599.0675 | 18.25 |
| 599.1013 | 13.5  |
| 599.1375 | 14.75 |
| 599.1688 | 12.5  |
| 599.2025 | 8.5   |
| 599.235  | 14.5  |
| 599.2688 | 7.5   |
| 599.3013 | 13.5  |
| 599.3363 | 11    |
| 599.37   | 14.5  |
| 599.405  | 11.5  |
| 599.4375 | 14.75 |
| 599.4713 | 12.25 |
| 599.5013 | 14.5  |
| 599.5363 | 18.5  |
| 599.57   | 10    |
| 599.6025 | 16.25 |
| 599.64   | 16    |
| 599.6713 | 16.25 |
| 599.7038 | 12.5  |
| 599.7363 | 12    |
| 599.77   | 18.25 |
| 599.8025 | 16.75 |

|          |       |
|----------|-------|
| 598.5138 | 13    |
| 598.545  | 12.5  |
| 598.5788 | 17    |
| 598.6113 | 14.5  |
| 598.645  | 20    |
| 598.6788 | 20.5  |
| 598.7125 | 16    |
| 598.7475 | 18.5  |
| 598.7788 | 17.5  |
| 598.8113 | 16.25 |
| 598.845  | 14    |
| 598.875  | 19    |
| 598.91   | 17.5  |
| 598.9438 | 12.75 |
| 598.9763 | 11.5  |
| 599.0138 | 14.5  |
| 599.0475 | 11.5  |
| 599.0788 | 13.75 |
| 599.1113 | 15.25 |
| 599.145  | 15.75 |
| 599.1788 | 15.5  |
| 599.2125 | 16    |
| 599.245  | 12    |
| 599.2788 | 14    |
| 599.3113 | 16.5  |
| 599.3425 | 11.75 |
| 599.375  | 11.25 |
| 599.41   | 16.5  |
| 599.4413 | 14.25 |
| 599.4763 | 12.5  |
| 599.5138 | 15    |
| 599.5475 | 13    |
| 599.5788 | 14.5  |
| 599.6113 | 10.5  |
| 599.645  | 13.75 |
| 599.6788 | 13    |
| 599.7125 | 11.25 |
| 599.745  | 13    |
| 599.78   | 11.75 |
| 599.8113 | 11.25 |
| 599.8438 | 13.25 |
| 599.875  | 12.75 |
| 599.91   | 11.75 |
