# Supplementary material
Source: publisher figshare collection journal article supplement (https://plos.figshare.com/articles/dataset/_/1323015)
Supplement: Supplementary file [file 1]

| treatment         | time (min) |           |         |          |          |
|-------------------|------------|-----------|---------|----------|----------|
|                   | treat code | replicate | walking | mounting | coupling |
| untreated coupled | 1          | 1         | 0.28    | 0.3      | 363.25   |
| untreated coupled | 1          | 2         | 0.03    | 0.52     | 239.93   |
| untreated coupled | 1          | 3         | 0.3     | 0.1      | 360.37   |
| untreated coupled | 1          | 4         | 1       | 0.18     | 418.31   |
| untreated coupled | 1          | 5         | 1.55    | 0.35     | 358.28   |
| untreated coupled | 1          | 6         | 1.67    | 0.02     | 238.13   |
| untreated coupled | 1          | 7         | 0.38    | 0.52     | 299.12   |
| untreated coupled | 1          | 8         | 0.52    | 0.12     | 239.86   |
| untreated coupled | 1          | 9         | 0.65    | 0.13     | 479.47   |
| untreated coupled | 1          | 10        | 0.62    | 0.23     | 360.12   |
| untreated coupled | 1          | 11        | 1.55    | 1.98     | 297.24   |
| untreated coupled | 1          | 12        | 0.98    | 0.44     | 419.08   |
| untreated coupled | 1          | 13        | 0.33    | 0.27     | 359.88   |
| untreated coupled | 1          | 14        | 1.75    | 1.1      | 357.65   |
| untreated coupled | 1          | 15        | 0.98    | 0.41     | 418.86   |
| untreated coupled | 1          | 16        | 0.87    | 0.16     | 419.12   |
| untreated coupled | 1          | 17        | 0.37    | 0.35     | 239.53   |
| untreated coupled | 1          | 18        | 1.62    | 0.53     | 358.45   |
| untreated coupled | 1          | 19        | 1.62    | 0.53     | 238.33   |
| untreated coupled | 1          | 20        | 3.47    | 0.09     | 296.86   |
| treated female    | 2          | 1         | 0.98    | 0.4      | 293.62   |
| treated female    | 2          | 2         | 0.77    | 0.09     | 363.14   |
| treated female    | 2          | 3         | 4.55    | 0.27     | 298.18   |
| treated female    | 2          | 4         | 0.52    | 0.35     | 297.13   |
| treated female    | 2          | 5         | 0.62    | 1.96     | 330.42   |
| treated female    | 2          | 6         | 0.25    | 0.05     | 97.7     |
| treated female    | 2          | 7         | 8.92    | 0.7      | 65.38    |
| treated female    | 2          | 8         | 0.28    | 0.22     | 404.5    |
| treated female    | 2          | 9         | 0.17    | 0.83     | 239.58   |
| treated female    | 2          | 10        | 0.57    | 0.38     | 323.05   |
| treated female    | 2          | 11        | 0.32    | 0.28     | 383.4    |
| treated female    | 2          | 12        | 0.42    | 0.05     | 439.53   |
| treated female    | 2          | 13        | 0.5     | 0.12     | 431.38   |
| treated female    | 2          | 14        | 0.03    | 0.08     | 29.89    |
| treated female    | 2          | 15        | 0.73    | 0.2      | 401.07   |
| treated female    | 2          | 16        | 0.87    | 0.29     | 221.84   |
| treated female    | 2          | 17        | 0.28    | 0.32     | 250.4    |
| treated female    | 2          | 18        | 0.37    | 0.92     | 230.71   |
| treated female    | 2          | 19        | 2.37    | 0.74     | 326.89   |
| treated female    | 2          | 20        | 0.67    | 0.27     | 343.06   |
| treated male      | 3          | 1         | 2.05    | 0.53     | 231.42   |
| treated male      | 3          | 2         | 2.92    | 0.04     | 249.04   |
| treated male      | 3          | 3         | 2       | 0.13     | 310.87   |
| treated male      | 3          | 4         | 1.93    | 0.18     | 420.49   |
| treated male      | 3          | 5         | 1.65    | 0.42     | 262.76   |
| treated male      | 3          | 6         | 1.65    | 0.47     | 158.88   |

|                |   |    |      |      |        |
|----------------|---|----|------|------|--------|
| treated male   | 3 | 7  | 1.52 | 0.25 | 124.59 |
| treated male   | 3 | 8  | 1.58 | 0.37 | 93.05  |
| treated male   | 3 | 9  | 1.2  | 0.83 | 38.97  |
| treated male   | 3 | 10 | 2.35 | 0.46 | 388.55 |
| treated male   | 3 | 11 | 3.15 | 0.2  | 33.43  |
| treated male   | 3 | 12 | 0.92 | 0.25 | 111.83 |
| treated male   | 3 | 13 | 7    | 0.05 | 113.95 |
| treated male   | 3 | 14 | 0.3  | 0.47 | 354.23 |
| treated male   | 3 | 15 | 1.12 | 0.17 | 390.71 |
| treated male   | 3 | 16 | 0.92 | 0.98 | 267.1  |
| treated male   | 3 | 17 | 1.86 | 0.36 | 231.78 |
| treated male   | 3 | 18 | 0.05 | 0.24 | 236.71 |
| treated male   | 3 | 19 | 2.03 | 0.27 | 230.7  |
| treated male   | 3 | 20 | 1.22 | 0.72 | 436.06 |
| treated couple | 4 | 1  | 0.67 | 0.85 | 454.48 |
| treated couple | 4 | 2  | 0.75 | 1.1  | 362.15 |
| treated couple | 4 | 3  | 0.4  | 0.34 | 326.26 |
| treated couple | 4 | 4  | 0.22 | 0.33 | 351.45 |
| treated couple | 4 | 5  | 1.35 | 1    | 519.57 |
| treated couple | 4 | 6  | 3.07 | 0.5  | 16.33  |
| treated couple | 4 | 7  | 1.67 | 0.2  | 434.23 |
| treated couple | 4 | 8  | 1.28 | 0.22 | 418.03 |
| treated couple | 4 | 9  | 2.35 | 0.35 | 443.3  |
| treated couple | 4 | 10 | 3.3  | 0.24 | 327.23 |
| treated couple | 4 | 11 | 0.67 | 0.28 | 409.05 |
| treated couple | 4 | 12 | 0.32 | 0.34 | 239.34 |
| treated couple | 4 | 13 | 0.38 | 0.38 | 76.24  |
| treated couple | 4 | 14 | 0.57 | 0.37 | 385.06 |
| treated couple | 4 | 15 | 2.93 | 0.42 | 270.93 |
| treated couple | 4 | 16 | 0.3  | 0.2  | 45.5   |
| treated couple | 4 | 17 | 0.88 | 0.31 | 483.81 |
| treated couple | 4 | 18 | 0.3  | 0.43 | 421.27 |
| treated couple | 4 | 19 | 3.03 | 0.2  | 353.77 |
| treated couple | 4 | 20 | 1.35 | 0.71 | 345.24 |
