# Supplementary material
Source: publisher figshare collection journal article supplement (https://plos.figshare.com/articles/dataset/_/1323015)
Supplement: Supplementary file [file 1]

Time in each group of activities  
(segundos)

|          | freezing | middle   | burst    |        | freezing | middle   | burst    |
|----------|----------|----------|----------|--------|----------|----------|----------|
| controle | 22.9     | 73.6     | 503.6    | azamax | 125.5    | 179.2    | 295.3    |
| controle | 58.5     | 72.4     | 469.1    | azamax | 125      | 126.5    | 348.5    |
| controle | 16.1     | 42.2     | 541.8    | azamax | 100.9    | 133.5    | 365.6    |
| controle | 4.5      | 20.8     | 574.7    | azamax | 52.6     | 140.3    | 407.1    |
| controle | 7.2      | 22.5     | 570.3    | azamax | 16.9     | 40.6     | 542.5    |
| controle | 10.7     | 35.5     | 553.8    | azamax | 170.8    | 204.7    | 224.5    |
| controle | 8.4      | 45.2     | 546.4    | azamax | 8.2      | 36.4     | 555.5    |
| controle | 2.8      | 14.8     | 582.4    | azamax | 30.7     | 89.5     | 479.8    |
| media    | 16.3875  | 40.875   | 542.7625 |        | 78.825   | 118.8375 | 402.35   |
| EPM      | 6.439899 | 7.944737 | 13.65735 |        | 21.16422 | 21.35084 | 41.50274 |

Frequency in each group of activity  
unidade

|          | freezing | middle   | burst    |        | freezing | middle   | burst    |
|----------|----------|----------|----------|--------|----------|----------|----------|
| controle | 553      | 1660     | 1713     | azamax | 2248     | 3307     | 2535     |
| controle | 818      | 1575     | 1414     | azamax | 1576     | 2610     | 2238     |
| controle | 319      | 970      | 974      | azamax | 1448     | 2618     | 2150     |
| controle | 116      | 521      | 555      | azamax | 1198     | 2758     | 2681     |
| controle | 171      | 534      | 575      | azamax | 344      | 883      | 881      |
| controle | 245      | 787      | 809      | azamax | 2669     | 3846     | 2846     |
| controle | 227      | 1065     | 1154     | azamax | 196      | 845      | 860      |
| controle | 65       | 333      | 336      | azamax | 700      | 1868     | 1846     |
| media    | 314.25   | 930.625  | 941.25   |        | 1297.375 | 2341.875 | 2004.625 |
| EPM      | 89.15731 | 172.6734 | 165.4308 |        | 309.7824 | 380.5227 | 271.2455 |
